# Supplementary material for: [Retracted] Shared Genetic and Epigenetic Mechanisms between the Osteogenic Differentiation of Dental Pulp Stem Cells and Bone Marrow Stem Cells
Source: Hindawi journal article supplement (doi:10.1155/2021/6697810), 2021-01-01
Supplement: f1 [file 6697810.f1.pdf]

| final_gene        | logFC    | AveExpr  | t        | P.Value  | adj.P.ValB | regulate    |
|-------------------|----------|----------|----------|----------|------------|-------------|
| hsa-let-7f-2-3p   | 4.542015 | -0.66057 | 21.0273  | 1.45E-06 | 0.000107   | 6.188199 up |
| hsa-miR-1468-3p   | 4.542015 | -0.66057 | 21.0273  | 1.45E-06 | 0.000107   | 6.188199 up |
| hsa-miR-153-3p    | 4.542015 | -0.66057 | 21.0273  | 1.45E-06 | 0.000107   | 6.188199 up |
| hsa-miR-212-5p    | 4.542015 | -0.66057 | 21.0273  | 1.45E-06 | 0.000107   | 6.188199 up |
| hsa-miR-2355-5p   | 4.542015 | -0.66057 | 21.0273  | 1.45E-06 | 0.000107   | 6.188199 up |
| hsa-miR-342-5p    | 4.542015 | -0.66057 | 21.0273  | 1.45E-06 | 0.000107   | 6.188199 up |
| hsa-miR-3658      | 4.542015 | -0.66057 | 21.0273  | 1.45E-06 | 0.000107   | 6.188199 up |
| hsa-miR-450a-1-3p | 4.542015 | -0.66057 | 21.0273  | 1.45E-06 | 0.000107   | 6.188199 up |
| hsa-miR-450b-3p   | 4.542015 | -0.66057 | 21.0273  | 1.45E-06 | 0.000107   | 6.188199 up |
| hsa-miR-4639-5p   | 4.542015 | -0.66057 | 21.0273  | 1.45E-06 | 0.000107   | 6.188199 up |
| hsa-miR-4730      | 4.542015 | -0.66057 | 21.0273  | 1.45E-06 | 0.000107   | 6.188199 up |
| hsa-miR-508-3p    | 4.542015 | -0.66057 | 21.0273  | 1.45E-06 | 0.000107   | 6.188199 up |
| hsa-miR-548d-5p   | 4.542015 | -0.66057 | 21.0273  | 1.45E-06 | 0.000107   | 6.188199 up |
| hsa-miR-588       | 4.542015 | -0.66057 | 21.0273  | 1.45E-06 | 0.000107   | 6.188199 up |
| hsa-miR-6077      | 4.542015 | -0.66057 | 21.0273  | 1.45E-06 | 0.000107   | 6.188199 up |
| hsa-miR-99a-3p    | 4.542015 | -0.66057 | 21.0273  | 1.45E-06 | 0.000107   | 6.188199 up |
| hsa-miR-1203      | 4.159148 | -0.46914 | 19.69086 | 2.09E-06 | 0.000107   | 5.870298 up |
| hsa-miR-1238-5p   | 4.159148 | -0.46914 | 19.69086 | 2.09E-06 | 0.000107   | 5.870298 up |
| hsa-miR-128-2-5p  | 4.159148 | -0.46914 | 19.69086 | 2.09E-06 | 0.000107   | 5.870298 up |
| hsa-miR-1288-5p   | 4.159148 | -0.46914 | 19.69086 | 2.09E-06 | 0.000107   | 5.870298 up |
| hsa-miR-129-5p    | 4.159148 | -0.46914 | 19.69086 | 2.09E-06 | 0.000107   | 5.870298 up |
| hsa-miR-138-1-3p  | 4.159148 | -0.46914 | 19.69086 | 2.09E-06 | 0.000107   | 5.870298 up |
| hsa-miR-141-3p    | 4.159148 | -0.46914 | 19.69086 | 2.09E-06 | 0.000107   | 5.870298 up |
| hsa-miR-1972      | 4.159148 | -0.46914 | 19.69086 | 2.09E-06 | 0.000107   | 5.870298 up |
| hsa-miR-3074-5p   | 4.159148 | -0.46914 | 19.69086 | 2.09E-06 | 0.000107   | 5.870298 up |
| hsa-miR-339-5p    | 4.159148 | -0.46914 | 19.69086 | 2.09E-06 | 0.000107   | 5.870298 up |
| hsa-miR-33a-3p    | 4.159148 | -0.46914 | 19.69086 | 2.09E-06 | 0.000107   | 5.870298 up |
| hsa-miR-34b-3p    | 4.159148 | -0.46914 | 19.69086 | 2.09E-06 | 0.000107   | 5.870298 up |
| hsa-miR-369-3p    | 4.159148 | -0.46914 | 19.69086 | 2.09E-06 | 0.000107   | 5.870298 up |
| hsa-miR-382-3p    | 4.159148 | -0.46914 | 19.69086 | 2.09E-06 | 0.000107   | 5.870298 up |
| hsa-miR-4421      | 4.159148 | -0.46914 | 19.69086 | 2.09E-06 | 0.000107   | 5.870298 up |
| hsa-miR-4435      | 4.159148 | -0.46914 | 19.69086 | 2.09E-06 | 0.000107   | 5.870298 up |
| hsa-miR-4436a     | 4.159148 | -0.46914 | 19.69086 | 2.09E-06 | 0.000107   | 5.870298 up |
| hsa-miR-4445-3p   | 4.159148 | -0.46914 | 19.69086 | 2.09E-06 | 0.000107   | 5.870298 up |
| hsa-miR-4667-3p   | 4.159148 | -0.46914 | 19.69086 | 2.09E-06 | 0.000107   | 5.870298 up |
| hsa-miR-4668-5p   | 4.159148 | -0.46914 | 19.69086 | 2.09E-06 | 0.000107   | 5.870298 up |
| hsa-miR-4717-3p   | 4.159148 | -0.46914 | 19.69086 | 2.09E-06 | 0.000107   | 5.870298 up |
| hsa-miR-4723-5p   | 4.159148 | -0.46914 | 19.69086 | 2.09E-06 | 0.000107   | 5.870298 up |
| hsa-miR-491-5p    | 4.159148 | -0.46914 | 19.69086 | 2.09E-06 | 0.000107   | 5.870298 up |
| hsa-miR-525-5p    | 4.159148 | -0.46914 | 19.69086 | 2.09E-06 | 0.000107   | 5.870298 up |
| hsa-miR-548am-5p  | 4.159148 | -0.46914 | 19.69086 | 2.09E-06 | 0.000107   | 5.870298 up |
| hsa-miR-5585-3p   | 4.159148 | -0.46914 | 19.69086 | 2.09E-06 | 0.000107   | 5.870298 up |
| hsa-miR-625-3p    | 4.159148 | -0.46914 | 19.69086 | 2.09E-06 | 0.000107   | 5.870298 up |
| hsa-miR-6512-3p   | 4.159148 | -0.46914 | 19.69086 | 2.09E-06 | 0.000107   | 5.870298 up |
| hsa-miR-656-3p    | 4.159148 | -0.46914 | 19.69086 | 2.09E-06 | 0.000107   | 5.870298 up |
| hsa-miR-660-3p    | 4.159148 | -0.46914 | 19.69086 | 2.09E-06 | 0.000107   | 5.870298 up |

|                  |          |          |          |          |          |          |      |
|------------------|----------|----------|----------|----------|----------|----------|------|
| hsa-miR-7153-5p  | 4.159148 | -0.46914 | 19.69086 | 2.09E-06 | 0.000107 | 5.870298 | up   |
| hsa-miR-7160-5p  | 4.159148 | -0.46914 | 19.69086 | 2.09E-06 | 0.000107 | 5.870298 | up   |
| hsa-miR-744-3p   | 4.159148 | -0.46914 | 19.69086 | 2.09E-06 | 0.000107 | 5.870298 | up   |
| hsa-miR-889-3p   | 4.159148 | -0.46914 | 19.69086 | 2.09E-06 | 0.000107 | 5.870298 | up   |
| hsa-miR-146b-5p  | 2.597821 | 3.929303 | 15.40817 | 8.13E-06 | 0.000406 | 4.603682 | up   |
| hsa-miR-340-5p   | 2.354598 | 3.793945 | 14.75304 | 1.03E-05 | 0.000506 | 4.368458 | up   |
| hsa-miR-374a-5p  | 1.36862  | 8.664616 | 8.588766 | 0.000193 | 0.009269 | 1.295918 | up   |
| hsa-miR-143-3p   | 1.792133 | 6.183356 | 8.440896 | 0.000211 | 0.00997  | 1.195654 | up   |
| hsa-miR-26a-5p   | 1.453034 | 10.01843 | 8.409893 | 0.000215 | 0.009981 | 1.174417 | up   |
| hsa-miR-374c-5p  | 2.242582 | 4.024352 | 8.038755 | 0.000273 | 0.012424 | 0.914201 | up   |
| hsa-miR-671-5p   | -3.2252  | 5.25711  | -7.95206 | 0.000289 | 0.012919 | 0.851776 | down |
| hsa-miR-34c-5p   | 1.919399 | 3.86025  | 7.510987 | 0.000389 | 0.017055 | 0.524062 | up   |
| hsa-miR-18a-5p   | 1.527156 | 4.594849 | 7.488931 | 0.000395 | 0.017055 | 0.507215 | up   |
| hsa-miR-6516-3p  | 1.19681  | 3.212137 | 7.409095 | 0.000417 | 0.017727 | 0.445856 | up   |
| hsa-miR-32-5p    | 1.158802 | 3.094503 | 7.306883 | 0.000448 | 0.018734 | 0.366424 | up   |
| hsa-miR-1273g-3p | -1.29359 | 10.78852 | -7.14202 | 0.000504 | 0.020731 | 0.236191 | down |
| hsa-miR-455-3p   | 1.790093 | 6.030445 | 7.106294 | 0.000517 | 0.020934 | 0.207617 | up   |
| hsa-miR-15a-5p   | 1.188892 | 8.970213 | 7.051944 | 0.000538 | 0.021341 | 0.163906 | up   |
| hsa-miR-376b-3p  | 1.761822 | 3.609335 | 6.748062 | 0.000674 | 0.021341 | -0.08603 | up   |
| hsa-miR-662      | -1.3515  | 2.286186 | -6.66233 | 0.000719 | 0.021341 | -0.15829 | down |
| hsa-miR-19a-3p   | 1.284872 | 8.327223 | 6.602564 | 0.000753 | 0.021341 | -0.20913 | up   |
| hsa-miR-3064-5p  | -1.28011 | 2.250488 | -6.23825 | 0.001002 | 0.021341 | -0.52761 | down |
| hsa-miR-6806-5p  | -1.00071 | 2.110791 | -6.23128 | 0.001008 | 0.021341 | -0.53384 | down |
| hsa-miR-3607-3p  | 1.727758 | 3.839161 | 6.222553 | 0.001015 | 0.021341 | -0.54167 | up   |
| hsa-miR-132-5p   | 1.897066 | 3.941561 | 6.214478 | 0.001021 | 0.021341 | -0.54891 | up   |
| hsa-miR-376a-3p  | 1.177259 | 7.200841 | 6.173801 | 0.001056 | 0.021483 | -0.58552 | up   |
| hsa-miR-605-5p   | -1.00714 | 2.114002 | -6.17258 | 0.001057 | 0.021483 | -0.58663 | down |
| hsa-miR-3074-3p  | -1.01365 | 2.117258 | -6.10974 | 0.001112 | 0.021918 | -0.64357 | down |
| hsa-miR-136-3p   | 1.251    | 4.495451 | 6.072738 | 0.001146 | 0.022034 | -0.67733 | up   |
| hsa-miR-450a-5p  | 1.772141 | 5.375757 | 6.068923 | 0.00115  | 0.022034 | -0.68082 | up   |
| hsa-miR-491-3p   | -1.02137 | 2.121121 | -6.03168 | 0.001185 | 0.02253  | -0.71497 | down |
| hsa-miR-4522     | -1.02215 | 2.121509 | -6.02365 | 0.001193 | 0.02253  | -0.72235 | down |
| hsa-miR-4767     | -1.02729 | 2.124079 | -5.9698  | 0.001248 | 0.023037 | -0.77209 | down |
| hsa-miR-342-3p   | 1.569669 | 5.278768 | 5.961143 | 0.001257 | 0.023037 | -0.78012 | up   |
| hsa-miR-30b-5p   | 1.115816 | 8.956931 | 5.953481 | 0.001265 | 0.023037 | -0.78723 | up   |
| hsa-miR-9500     | -1.03161 | 2.126237 | -5.92377 | 0.001296 | 0.023236 | -0.81489 | down |
| hsa-miR-186-5p   | 1.35849  | 4.73354  | 5.917204 | 0.001304 | 0.023236 | -0.82101 | up   |
| hsa-miR-140-3p   | 1.517593 | 5.927255 | 5.880692 | 0.001344 | 0.023792 | -0.85517 | up   |
| hsa-miR-145-3p   | 1.737849 | 4.120659 | 5.858621 | 0.001369 | 0.02398  | -0.87589 | up   |
| hsa-miR-145-5p   | 1.058773 | 8.370659 | 5.854275 | 0.001374 | 0.02398  | -0.87998 | up   |
| hsa-miR-26b-5p   | 1.116578 | 9.335342 | 5.846845 | 0.001383 | 0.02398  | -0.88698 | up   |
| hsa-miR-17-3p    | 1.172518 | 3.762659 | 5.709791 | 0.001554 | 0.026765 | -1.01726 | up   |
| hsa-miR-146a-5p  | -1.87683 | 8.071928 | -5.67213 | 0.001605 | 0.027279 | -1.05347 | down |
| hsa-miR-3610     | -1.38237 | 2.301617 | -5.65713 | 0.001626 | 0.027452 | -1.06794 | down |
| hsa-miR-4253     | -1.29906 | 3.34246  | -5.61563 | 0.001686 | 0.028271 | -1.10815 | down |
| hsa-miR-6779-5p  | -1.0665  | 2.143684 | -5.53828 | 0.001804 | 0.030051 | -1.18367 | down |
| hsa-miR-2681-5p  | -1.07207 | 2.14647  | -5.47647 | 0.001905 | 0.031529 | -1.24458 | down |

|                 |          |          |          |          |          |          |      |
|-----------------|----------|----------|----------|----------|----------|----------|------|
| hsa-miR-1266-3p | -1.0764  | 2.148635 | -5.42868 | 0.001987 | 0.032684 | -1.29202 | down |
| hsa-miR-7114-3p | -1.08052 | 2.150693 | -5.3835  | 0.002069 | 0.033789 | -1.33715 | down |
| hsa-miR-132-3p  | 1.869621 | 6.130689 | 5.37719  | 0.002081 | 0.033789 | -1.34348 | up   |
| hsa-miR-5196-5p | -1.08566 | 2.153265 | -5.32743 | 0.002177 | 0.035114 | -1.39354 | down |
| hsa-miR-423-5p  | 1.131993 | 4.719787 | 5.316737 | 0.002198 | 0.035232 | -1.40434 | up   |
| hsa-miR-18b-5p  | 1.189691 | 3.256923 | 5.294257 | 0.002243 | 0.035733 | -1.4271  | up   |
| hsa-miR-6746-5p | -1.09238 | 2.156624 | -5.25502 | 0.002324 | 0.036703 | -1.467   | down |
| hsa-miR-5684    | -1.10919 | 4.466116 | -5.25117 | 0.002333 | 0.036703 | -1.47092 | down |
| hsa-miR-188-5p  | -1.21407 | 4.464776 | -5.23916 | 0.002358 | 0.036881 | -1.48318 | down |
| hsa-miR-3653-3p | 1.498623 | 4.912086 | 5.22296  | 0.002394 | 0.037016 | -1.49975 | up   |
| hsa-miR-193b-3p | 1.018439 | 6.248498 | 5.221626 | 0.002397 | 0.037016 | -1.50111 | up   |
| hsa-miR-542-3p  | 1.489799 | 4.872849 | 5.177128 | 0.002497 | 0.037881 | -1.54682 | up   |
| hsa-miR-224-5p  | 1.914143 | 3.485365 | 5.149977 | 0.00256  | 0.038613 | -1.57484 | up   |
| hsa-miR-337-3p  | 1.294409 | 3.719895 | 5.119755 | 0.002633 | 0.039477 | -1.60614 | up   |
| hsa-miR-3621    | -1.10829 | 2.164581 | -5.08774 | 0.002713 | 0.040435 | -1.63945 | down |
| hsa-miR-6817-3p | -1.10977 | 2.165317 | -5.07261 | 0.002751 | 0.04065  | -1.65524 | down |
| hsa-miR-365a-3p | 1.639558 | 8.359128 | 5.069623 | 0.002759 | 0.04065  | -1.65836 | up   |
| hsa-miR-4487    | -1.47433 | 2.347598 | -4.99176 | 0.002969 | 0.043239 | -1.74016 | down |
| hsa-miR-378d    | 4.522969 | 0.592851 | 4.970719 | 0.003028 | 0.043859 | -1.76242 | up   |
| hsa-miR-4429    | -1.12102 | 2.170943 | -4.95896 | 0.003062 | 0.044101 | -1.77488 | down |
| hsa-miR-6774-5p | -1.13178 | 2.176325 | -4.8538  | 0.003387 | 0.047958 | -1.88723 | down |
| hsa-miR-6856-3p | -1.1428  | 2.181833 | -4.74993 | 0.003746 | 0.052177 | -1.99977 | down |
| hsa-miR-374b-5p | 1.181797 | 7.626935 | 4.731909 | 0.003813 | 0.052817 | -2.01946 | up   |
| hsa-miR-5003-5p | 1.121896 | 3.819027 | 4.676881 | 0.004025 | 0.055455 | -2.07987 | up   |
| hsa-miR-6798-5p | -1.16244 | 2.191656 | -4.57425 | 0.004458 | 0.060761 | -2.19372 | down |
| hsa-miR-376a-5p | 1.314329 | 3.736387 | 4.548071 | 0.004576 | 0.062047 | -2.22302 | up   |
| hsa-miR-574-3p  | 1.076232 | 5.920441 | 4.426052 | 0.005179 | 0.068052 | -2.3609  | up   |
| hsa-miR-6728-3p | -1.19503 | 2.207949 | -4.30947 | 0.005841 | 0.07558  | -2.49475 | down |
| hsa-miR-210-3p  | 2.236921 | 7.13388  | 4.248522 | 0.006225 | 0.079339 | -2.56554 | up   |
| hsa-miR-378i    | 1.148906 | 4.12097  | 4.189598 | 0.006624 | 0.083582 | -2.63452 | up   |
| hsa-miR-744-5p  | 4.979853 | 1.160045 | 4.173855 | 0.006735 | 0.084155 | -2.65303 | up   |
| hsa-miR-101-3p  | 1.749971 | 6.132248 | 4.077173 | 0.007467 | 0.090636 | -2.76759 | up   |
| hsa-miR-1471    | -1.64369 | 2.432278 | -4.01437 | 0.007991 | 0.096077 | -2.84276 | down |
| hsa-miR-199b-5p | 1.9098   | 9.953779 | 3.949902 | 0.008572 | 0.100689 | -2.92056 | up   |
| hsa-miR-4642    | -1.27391 | 2.932077 | -3.9137  | 0.008919 | 0.104275 | -2.96452 | down |
| hsa-miR-411-5p  | 1.017538 | 4.356002 | 3.909628 | 0.008959 | 0.104275 | -2.96948 | up   |
| hsa-miR-6088    | -1.0785  | 6.833107 | -3.87249 | 0.009333 | 0.107651 | -3.01481 | down |
| hsa-miR-7157-3p | 1.18265  | 2.76607  | 3.658818 | 0.011862 | 0.131463 | -3.27964 | up   |
| hsa-miR-874-5p  | 3.285345 | -0.03224 | 3.627031 | 0.0123   | 0.133575 | -3.31962 | up   |
| hsa-miR-378e    | 3.284499 | -0.03182 | 3.623276 | 0.012353 | 0.133575 | -3.32435 | up   |
| hsa-miR-619-5p  | 3.284026 | -0.03158 | 3.621183 | 0.012383 | 0.133575 | -3.32699 | up   |
| hsa-miR-640     | 3.282041 | -0.03059 | 3.612407 | 0.012508 | 0.133575 | -3.33806 | up   |
| hsa-miR-3189-5p | 3.281579 | -0.03036 | 3.610368 | 0.012537 | 0.133575 | -3.34063 | up   |
| hsa-miR-204-3p  | 3.28052  | -0.02983 | 3.605704 | 0.012604 | 0.133575 | -3.34652 | up   |
| hsa-miR-148a-3p | 2.071276 | 5.140517 | 3.603995 | 0.012629 | 0.133575 | -3.34868 | up   |
| hsa-miR-6793-3p | 3.278944 | -0.02904 | 3.598778 | 0.012705 | 0.133661 | -3.35528 | up   |
| hsa-miR-4293    | 3.277548 | -0.02834 | 3.592662 | 0.012795 | 0.133661 | -3.36301 | up   |

|                 |          |          |          |          |          |          |      |
|-----------------|----------|----------|----------|----------|----------|----------|------|
| hsa-miR-4259    | -2.21287 | 4.498193 | -3.58519 | 0.012905 | 0.134264 | -3.37247 | down |
| hsa-miR-3193    | 3.274538 | -0.02683 | 3.57952  | 0.012989 | 0.134593 | -3.37965 | up   |
| hsa-miR-4530    | -1.23649 | 8.372501 | -3.5714  | 0.013111 | 0.134752 | -3.38994 | down |
| hsa-miR-5095    | 3.271863 | -0.0255  | 3.567904 | 0.013164 | 0.134752 | -3.39438 | up   |
| hsa-miR-31-5p   | 1.663262 | 7.253576 | 3.565994 | 0.013193 | 0.134752 | -3.3968  | up   |
| hsa-miR-4282    | 3.271075 | -0.0251  | 3.564494 | 0.013216 | 0.134752 | -3.3987  | up   |
| hsa-miR-6134    | 1.011217 | 3.76022  | 3.538103 | 0.013625 | 0.138371 | -3.43225 | up   |
| hsa-miR-4485-3p | -1.54112 | 5.730019 | -3.49016 | 0.014405 | 0.145712 | -3.49344 | down |
| hsa-miR-148b-3p | 1.057841 | 4.962578 | 3.447687 | 0.015138 | 0.152519 | -3.54793 | up   |
| hsa-miR-181a-2' | 1.280156 | 3.917589 | 3.423145 | 0.015581 | 0.155136 | -3.57953 | up   |
| hsa-miR-345-3p  | -1.35269 | 2.28678  | -3.40513 | 0.015914 | 0.157843 | -3.60277 | down |
| hsa-miR-6726-5p | -1.35435 | 2.287609 | -3.39815 | 0.016046 | 0.158531 | -3.6118  | down |
| hsa-miR-1915-5p | -1.35711 | 2.288988 | -3.38661 | 0.016266 | 0.159468 | -3.62672 | down |
| hsa-miR-6781-5p | -1.37965 | 2.30026  | -3.29629 | 0.018108 | 0.174248 | -3.74419 | down |
| hsa-miR-301a-3p | 1.075828 | 4.903057 | 3.293936 | 0.018159 | 0.174248 | -3.74726 | up   |
| hsa-miR-6076    | -1.96507 | 5.272728 | -3.27411 | 0.018595 | 0.174248 | -3.77319 | down |
| hsa-miR-6869-5p | -1.13218 | 7.39827  | -3.26435 | 0.018815 | 0.174248 | -3.78599 | down |
| hsa-miR-135a-3p | -1.11162 | 4.434706 | -3.1406  | 0.021852 | 0.174248 | -3.94918 | down |
| hsa-miR-224-3p  | 3.767549 | 0.551589 | 3.049461 | 0.024435 | 0.174248 | -4.07057 | up   |
| hsa-miR-5703    | -3.02564 | 4.246269 | -3.04479 | 0.024576 | 0.174248 | -4.07681 | down |
| hsa-miR-8063    | -1.22747 | 5.462025 | -3.04027 | 0.024714 | 0.174248 | -4.08287 | down |
| hsa-miR-4516    | -2.22933 | 9.189867 | -2.934   | 0.0282   | 0.174248 | -4.22571 | down |
| hsa-miR-5787    | -1.67568 | 5.604019 | -2.90533 | 0.029231 | 0.174248 | -4.26445 | down |
| hsa-miR-4459    | -1.70951 | 8.55978  | -2.89417 | 0.029643 | 0.174248 | -4.27956 | down |
| hsa-miR-10a-5p  | 1.097321 | 6.408513 | 2.87606  | 0.030326 | 0.174248 | -4.30409 | up   |
| hsa-miR-483-3p  | -1.48228 | 2.705507 | -2.8321  | 0.032055 | 0.175338 | -4.36378 | down |
| hsa-miR-7111-3p | -1.02347 | 2.442079 | -2.82336 | 0.032411 | 0.176366 | -4.37567 | down |
| hsa-miR-6089    | -1.00436 | 9.712561 | -2.8224  | 0.03245  | 0.176366 | -4.37697 | down |
| hsa-miR-2277-3p | -3.76267 | 0.295842 | -2.81005 | 0.032962 | 0.177841 | -4.39378 | down |
| hsa-miR-6892-3p | -1.49759 | 2.72778  | -2.80912 | 0.033001 | 0.177841 | -4.39505 | down |
| hsa-miR-671-3p  | -1.54331 | 2.382088 | -2.80454 | 0.033193 | 0.178386 | -4.40129 | down |
| hsa-miR-4267    | -1.06037 | 2.454623 | -2.71339 | 0.037281 | 0.195939 | -4.5258  | down |
| hsa-miR-4508    | -3.87546 | -1.19625 | -2.68421 | 0.038703 | 0.200249 | -4.56579 | down |
| hsa-miR-630     | -2.87494 | 4.512782 | -2.68331 | 0.038748 | 0.200249 | -4.56702 | down |
| hsa-miR-520b    | -3.88615 | -1.1909  | -2.68318 | 0.038754 | 0.200249 | -4.5672  | down |
| hsa-miR-4519    | -3.89259 | -1.18768 | -2.68253 | 0.038787 | 0.200249 | -4.5681  | down |
| hsa-miR-10b-3p  | -3.89675 | -1.1856  | -2.68209 | 0.038809 | 0.200249 | -4.56869 | down |
| hsa-miR-3197    | -3.55133 | -1.35831 | -2.67399 | 0.039215 | 0.201628 | -4.57981 | down |
| hsa-miR-4444    | -3.54565 | -1.36115 | -2.67296 | 0.039266 | 0.201628 | -4.58122 | down |
| hsa-miR-191-5p  | 3.829235 | 1.12583  | 2.646131 | 0.040647 | 0.207632 | -4.61806 | up   |
| hsa-miR-34a-3p  | 1.018171 | 6.000175 | 2.639824 | 0.040979 | 0.208493 | -4.62673 | up   |
| hsa-miR-455-5p  | 1.339823 | 4.841864 | 2.5978   | 0.043267 | 0.21747  | -4.68454 | up   |
| hsa-miR-21-3p   | 1.256959 | 6.846537 | 2.565243 | 0.045133 | 0.224697 | -4.7294  | up   |
| hsa-miR-3164    | -3.20729 | -1.53033 | -2.54607 | 0.046273 | 0.229302 | -4.75583 | down |
| hsa-miR-6087    | -1.1209  | 8.373423 | -2.51226 | 0.048358 | 0.238024 | -4.8025  | down |
| hsa-miR-3680-3p | 3.669098 | 0.822035 | 2.512065 | 0.04837  | 0.238024 | -4.80277 | up   |
