# Supplementary material for: [Retracted] Shared Genetic and Epigenetic Mechanisms between the Osteogenic Differentiation of Dental Pulp Stem Cells and Bone Marrow Stem Cells
Source: Hindawi journal article supplement (doi:10.1155/2021/6697810), 2021-01-01
Supplement: f2 [file 6697810.f2.pdf]

|           |   |        |          |          |          |          |          |    |
|-----------|---|--------|----------|----------|----------|----------|----------|----|
| hsa-miR-6 | 4 | 159148 | -0.46914 | 19.69086 | 2.09E-06 | 0.000107 | 5.870298 | up |
| hsa-miR-6 | 4 | 159148 | -0.46914 | 19.69086 | 2.09E-06 | 0.000107 | 5.870298 | up |
| hsa-miR-7 | 4 | 159148 | -0.46914 | 19.69086 | 2.09E-06 | 0.000107 | 5.870298 | up |
| hsa-miR-7 | 4 | 159148 | -0.46914 | 19.69086 | 2.09E-06 | 0.000107 | 5.870298 | up |
| hsa-miR-7 | 4 | 159148 | -0.46914 | 19.69086 | 2.09E-06 | 0.000107 | 5.870298 | up |
| hsa-miR-8 | 4 | 159148 | -0.46914 | 19.69086 | 2.09E-06 | 0.000107 | 5.870298 | up |
| hsa-miR-1 | 3 | 829235 | 1.12583  | 2.646131 | 0.040647 | 0.207632 | -4.61806 | up |
| hsa-miR-2 | 3 | 767549 | 0.551589 | 3.049461 | 0.024435 | 0.174248 | -4.07057 | up |
| hsa-miR-3 | 3 | 669098 | 0.822035 | 2.512065 | 0.04837  | 0.238024 | -4.80277 | up |
| hsa-miR-8 | 3 | 285345 | -0.03224 | 3.627031 | 0.0123   | 0.133575 | -3.31962 | up |
| hsa-miR-3 | 3 | 284499 | -0.03182 | 3.623276 | 0.012353 | 0.133575 | -3.32435 | up |
| hsa-miR-6 | 3 | 284026 | -0.03158 | 3.621183 | 0.012383 | 0.133575 | -3.32699 | up |
| hsa-miR-6 | 3 | 282041 | -0.03059 | 3.612407 | 0.012508 | 0.133575 | -3.33806 | up |
| hsa-miR-3 | 3 | 281579 | -0.03036 | 3.610368 | 0.012537 | 0.133575 | -3.34063 | up |
| hsa-miR-2 | 3 | 28052  | -0.02983 | 3.605704 | 0.012604 | 0.133575 | -3.34652 | up |
| hsa-miR-6 | 3 | 278944 | -0.02904 | 3.598778 | 0.012705 | 0.133661 | -3.35528 | up |
| hsa-miR-4 | 3 | 277548 | -0.02834 | 3.592662 | 0.012795 | 0.133661 | -3.36301 | up |
| hsa-miR-3 | 3 | 274538 | -0.02683 | 3.57952  | 0.012989 | 0.134593 | -3.37965 | up |
| hsa-miR-5 | 3 | 271863 | -0.0255  | 3.567904 | 0.013164 | 0.134752 | -3.39438 | up |
| hsa-miR-4 | 3 | 271075 | -0.0251  | 3.564494 | 0.013216 | 0.134752 | -3.3987  | up |
| hsa-miR-1 | 2 | 597821 | 3.929303 | 15.40817 | 8.13E-06 | 0.000406 | 4.603682 | up |
| hsa-miR-3 | 2 | 354598 | 3.793945 | 14.75304 | 1.03E-05 | 0.000506 | 4.368458 | up |
| hsa-miR-3 | 2 | 242582 | 4.024352 | 8.038755 | 0.000273 | 0.012424 | 0.914201 | up |
| hsa-miR-2 | 2 | 236921 | 7.13388  | 4.248522 | 0.006225 | 0.079339 | -2.56554 | up |
| hsa-miR-1 | 2 | 071276 | 5.140517 | 3.603995 | 0.012629 | 0.133575 | -3.34868 | up |
| hsa-miR-3 | 1 | 919399 | 3.86025  | 7.510987 | 0.000389 | 0.017055 | 0.524062 | up |
| hsa-miR-2 | 1 | 914143 | 3.485365 | 5.149977 | 0.00256  | 0.038613 | -1.57484 | up |
| hsa-miR-1 | 1 | 9098   | 9.953779 | 3.949902 | 0.008572 | 0.100689 | -2.92056 | up |
| hsa-miR-1 | 1 | 897066 | 3.941561 | 6.214478 | 0.001021 | 0.021341 | -0.54891 | up |
| hsa-miR-1 | 1 | 869621 | 6.130689 | 5.37719  | 0.002081 | 0.033789 | -1.34348 | up |
| hsa-miR-1 | 1 | 792133 | 6.183356 | 8.440896 | 0.000211 | 0.00997  | 1.195654 | up |
| hsa-miR-4 | 1 | 790093 | 6.030445 | 7.106294 | 0.000517 | 0.020934 | 0.207617 | up |
| hsa-miR-4 | 1 | 772141 | 5.375757 | 6.068923 | 0.00115  | 0.022034 | -0.68082 | up |
| hsa-miR-3 | 1 | 761822 | 3.609335 | 6.748062 | 0.000674 | 0.021341 | -0.08603 | up |
| hsa-miR-1 | 1 | 749971 | 6.132248 | 4.077173 | 0.007467 | 0.090636 | -2.76759 | up |
| hsa-miR-1 | 1 | 737849 | 4.120659 | 5.858621 | 0.001369 | 0.02398  | -0.87589 | up |
| hsa-miR-3 | 1 | 727758 | 3.839161 | 6.222553 | 0.001015 | 0.021341 | -0.54167 | up |
| hsa-miR-3 | 1 | 663262 | 7.253576 | 3.565994 | 0.013193 | 0.134752 | -3.3968  | up |
| hsa-miR-3 | 1 | 639558 | 8.359128 | 5.069623 | 0.002759 | 0.04065  | -1.65836 | up |
| hsa-miR-3 | 1 | 569669 | 5.278768 | 5.961143 | 0.001257 | 0.023037 | -0.78012 | up |
| hsa-miR-1 | 1 | 527156 | 4.594849 | 7.488931 | 0.000395 | 0.017055 | 0.507215 | up |
| hsa-miR-1 | 1 | 517593 | 5.927255 | 5.880692 | 0.001344 | 0.023792 | -0.85517 | up |
| hsa-miR-3 | 1 | 498623 | 4.912086 | 5.22296  | 0.002394 | 0.037016 | -1.49975 | up |
| hsa-miR-5 | 1 | 489799 | 4.872849 | 5.177128 | 0.002497 | 0.037881 | -1.54682 | up |
| hsa-miR-2 | 1 | 453034 | 10.01843 | 8.409893 | 0.000215 | 0.009981 | 1.174417 | up |
| hsa-miR-3 | 1 | 36862  | 8.664616 | 8.588766 | 0.000193 | 0.009269 | 1.295918 | up |
| hsa-miR-1 | 1 | 35849  | 4.73354  | 5.917204 | 0.001304 | 0.023236 | -0.82101 | up |

|           |           |           |           |           |           |           |      |
|-----------|-----------|-----------|-----------|-----------|-----------|-----------|------|
| hsa-miR-4 | 1. 339823 | 4. 841864 | 2. 5978   | 0. 043267 | 0. 21747  | -4. 68454 | up   |
| hsa-miR-3 | 1. 314329 | 3. 736387 | 4. 548071 | 0. 004576 | 0. 062047 | -2. 22302 | up   |
| hsa-miR-3 | 1. 294409 | 3. 719895 | 5. 119755 | 0. 002633 | 0. 039477 | -1. 60614 | up   |
| hsa-miR-1 | 1. 284872 | 8. 327223 | 6. 602564 | 0. 000753 | 0. 021341 | -0. 20913 | up   |
| hsa-miR-1 | 1. 280156 | 3. 917589 | 3. 423145 | 0. 015581 | 0. 155136 | -3. 57953 | up   |
| hsa-miR-2 | 1. 256959 | 6. 846537 | 2. 565243 | 0. 045133 | 0. 224697 | -4. 7294  | up   |
| hsa-miR-1 | 1. 251    | 4. 495451 | 6. 072738 | 0. 001146 | 0. 022034 | -0. 67733 | up   |
| hsa-miR-6 | 1. 19681  | 3. 212137 | 7. 409095 | 0. 000417 | 0. 017727 | 0. 445856 | up   |
| hsa-miR-1 | 1. 189691 | 3. 256923 | 5. 294257 | 0. 002243 | 0. 035733 | -1. 4271  | up   |
| hsa-miR-1 | 1. 188892 | 8. 970213 | 7. 051944 | 0. 000538 | 0. 021341 | 0. 163906 | up   |
| hsa-miR-7 | 1. 18265  | 2. 76607  | 3. 658818 | 0. 011862 | 0. 131463 | -3. 27964 | up   |
| hsa-miR-3 | 1. 181797 | 7. 626935 | 4. 731909 | 0. 003813 | 0. 052817 | -2. 01946 | up   |
| hsa-miR-3 | 1. 177259 | 7. 200841 | 6. 173801 | 0. 001056 | 0. 021483 | -0. 58552 | up   |
| hsa-miR-1 | 1. 172518 | 3. 762659 | 5. 709791 | 0. 001554 | 0. 026765 | -1. 01726 | up   |
| hsa-miR-3 | 1. 158802 | 3. 094503 | 7. 306883 | 0. 000448 | 0. 018734 | 0. 366424 | up   |
| hsa-miR-3 | 1. 148906 | 4. 12097  | 4. 189598 | 0. 006624 | 0. 083582 | -2. 63452 | up   |
| hsa-miR-4 | 1. 131993 | 4. 719787 | 5. 316737 | 0. 002198 | 0. 035232 | -1. 40434 | up   |
| hsa-miR-5 | 1. 121896 | 3. 819027 | 4. 676881 | 0. 004025 | 0. 055455 | -2. 07987 | up   |
| hsa-miR-2 | 1. 116578 | 9. 335342 | 5. 846845 | 0. 001383 | 0. 02398  | -0. 88698 | up   |
| hsa-miR-3 | 1. 115816 | 8. 956931 | 5. 953481 | 0. 001265 | 0. 023037 | -0. 78723 | up   |
| hsa-miR-1 | 1. 097321 | 6. 408513 | 2. 87606  | 0. 030326 | 0. 174248 | -4. 30409 | up   |
| hsa-miR-5 | 1. 076232 | 5. 920441 | 4. 426052 | 0. 005179 | 0. 068052 | -2. 3609  | up   |
| hsa-miR-3 | 1. 075828 | 4. 903057 | 3. 293936 | 0. 018159 | 0. 174248 | -3. 74726 | up   |
| hsa-miR-1 | 1. 058773 | 8. 370659 | 5. 854275 | 0. 001374 | 0. 02398  | -0. 87998 | up   |
| hsa-miR-1 | 1. 057841 | 4. 962578 | 3. 447687 | 0. 015138 | 0. 152519 | -3. 54793 | up   |
| hsa-miR-1 | 1. 018439 | 6. 248498 | 5. 221626 | 0. 002397 | 0. 037016 | -1. 50111 | up   |
| hsa-miR-3 | 1. 018171 | 6. 000175 | 2. 639824 | 0. 040979 | 0. 208493 | -4. 62673 | up   |
| hsa-miR-4 | 1. 017538 | 4. 356002 | 3. 909628 | 0. 008959 | 0. 104275 | -2. 96948 | up   |
| hsa-miR-6 | 1. 011217 | 3. 76022  | 3. 538103 | 0. 013625 | 0. 138371 | -3. 43225 | up   |
| hsa-miR-6 | -1. 00071 | 2. 110791 | -6. 23128 | 0. 001008 | 0. 021341 | -0. 53384 | down |
| hsa-miR-6 | -1. 00436 | 9. 712561 | -2. 8224  | 0. 03245  | 0. 176366 | -4. 37697 | down |
| hsa-miR-6 | -1. 00714 | 2. 114002 | -6. 17258 | 0. 001057 | 0. 021483 | -0. 58663 | down |
| hsa-miR-3 | -1. 01365 | 2. 117258 | -6. 10974 | 0. 001112 | 0. 021918 | -0. 64357 | down |
| hsa-miR-4 | -1. 02137 | 2. 121121 | -6. 03168 | 0. 001185 | 0. 02253  | -0. 71497 | down |
| hsa-miR-4 | -1. 02215 | 2. 121509 | -6. 02365 | 0. 001193 | 0. 02253  | -0. 72235 | down |
| hsa-miR-7 | -1. 02347 | 2. 442079 | -2. 82336 | 0. 032411 | 0. 176366 | -4. 37567 | down |
| hsa-miR-4 | -1. 02729 | 2. 124079 | -5. 9698  | 0. 001248 | 0. 023037 | -0. 77209 | down |
| hsa-miR-9 | -1. 03161 | 2. 126237 | -5. 92377 | 0. 001296 | 0. 023236 | -0. 81489 | down |
| hsa-miR-4 | -1. 06037 | 2. 454623 | -2. 71339 | 0. 037281 | 0. 195939 | -4. 5258  | down |
| hsa-miR-6 | -1. 0665  | 2. 143684 | -5. 53828 | 0. 001804 | 0. 030051 | -1. 18367 | down |
| hsa-miR-2 | -1. 07207 | 2. 14647  | -5. 47647 | 0. 001905 | 0. 031529 | -1. 24458 | down |
| hsa-miR-1 | -1. 0764  | 2. 148635 | -5. 42868 | 0. 001987 | 0. 032684 | -1. 29202 | down |
| hsa-miR-6 | -1. 0785  | 6. 833107 | -3. 87249 | 0. 009333 | 0. 107651 | -3. 01481 | down |
| hsa-miR-7 | -1. 08052 | 2. 150693 | -5. 3835  | 0. 002069 | 0. 033789 | -1. 33715 | down |
| hsa-miR-5 | -1. 08566 | 2. 153265 | -5. 32743 | 0. 002177 | 0. 035114 | -1. 39354 | down |
| hsa-miR-6 | -1. 09238 | 2. 156624 | -5. 25502 | 0. 002324 | 0. 036703 | -1. 467   | down |
| hsa-miR-3 | -1. 10829 | 2. 164581 | -5. 08774 | 0. 002713 | 0. 040435 | -1. 63945 | down |

|           |          |          |          |          |          |          |      |
|-----------|----------|----------|----------|----------|----------|----------|------|
| hsa-miR-5 | -1.10919 | 4.466116 | -5.25117 | 0.002333 | 0.036703 | -1.47092 | down |
| hsa-miR-6 | -1.10977 | 2.165317 | -5.07261 | 0.002751 | 0.04065  | -1.65524 | down |
| hsa-miR-1 | -1.11162 | 4.434706 | -3.1406  | 0.021852 | 0.174248 | -3.94918 | down |
| hsa-miR-6 | -1.1209  | 8.373423 | -2.51226 | 0.048358 | 0.238024 | -4.8025  | down |
| hsa-miR-4 | -1.12102 | 2.170943 | -4.95896 | 0.003062 | 0.044101 | -1.77488 | down |
| hsa-miR-6 | -1.13178 | 2.176325 | -4.8538  | 0.003387 | 0.047958 | -1.88723 | down |
| hsa-miR-6 | -1.13218 | 7.39827  | -3.26435 | 0.018815 | 0.174248 | -3.78599 | down |
| hsa-miR-6 | -1.1428  | 2.181833 | -4.74993 | 0.003746 | 0.052177 | -1.99977 | down |
| hsa-miR-6 | -1.16244 | 2.191656 | -4.57425 | 0.004458 | 0.060761 | -2.19372 | down |
| hsa-miR-6 | -1.19503 | 2.207949 | -4.30947 | 0.005841 | 0.07558  | -2.49475 | down |
| hsa-miR-1 | -1.21407 | 4.464776 | -5.23916 | 0.002358 | 0.036881 | -1.48318 | down |
| hsa-miR-8 | -1.22747 | 5.462025 | -3.04027 | 0.024714 | 0.174248 | -4.08287 | down |
| hsa-miR-4 | -1.23649 | 8.372501 | -3.5714  | 0.013111 | 0.134752 | -3.38994 | down |
| hsa-miR-4 | -1.27391 | 2.932077 | -3.9137  | 0.008919 | 0.104275 | -2.96452 | down |
| hsa-miR-3 | -1.28011 | 2.250488 | -6.23825 | 0.001002 | 0.021341 | -0.52761 | down |
| hsa-miR-1 | -1.29359 | 10.78852 | -7.14202 | 0.000504 | 0.020731 | 0.236191 | down |
| hsa-miR-4 | -1.29906 | 3.34246  | -5.61563 | 0.001686 | 0.028271 | -1.10815 | down |
| hsa-miR-6 | -1.3515  | 2.286186 | -6.66233 | 0.000719 | 0.021341 | -0.15829 | down |
| hsa-miR-3 | -1.35269 | 2.28678  | -3.40513 | 0.015914 | 0.157843 | -3.60277 | down |
| hsa-miR-6 | -1.35435 | 2.287609 | -3.39815 | 0.016046 | 0.158531 | -3.6118  | down |
| hsa-miR-1 | -1.35711 | 2.288988 | -3.38661 | 0.016266 | 0.159468 | -3.62672 | down |
| hsa-miR-6 | -1.37965 | 2.30026  | -3.29629 | 0.018108 | 0.174248 | -3.74419 | down |
| hsa-miR-3 | -1.38237 | 2.301617 | -5.65713 | 0.001626 | 0.027452 | -1.06794 | down |
| hsa-miR-4 | -1.47433 | 2.347598 | -4.99176 | 0.002969 | 0.043239 | -1.74016 | down |
| hsa-miR-4 | -1.48228 | 2.705507 | -2.8321  | 0.032055 | 0.175338 | -4.36378 | down |
| hsa-miR-6 | -1.49759 | 2.72778  | -2.80912 | 0.033001 | 0.177841 | -4.39505 | down |
| hsa-miR-4 | -1.54112 | 5.730019 | -3.49016 | 0.014405 | 0.145712 | -3.49344 | down |
| hsa-miR-6 | -1.54331 | 2.382088 | -2.80454 | 0.033193 | 0.178386 | -4.40129 | down |
| hsa-miR-1 | -1.64369 | 2.432278 | -4.01437 | 0.007991 | 0.096077 | -2.84276 | down |
| hsa-miR-5 | -1.67568 | 5.604019 | -2.90533 | 0.029231 | 0.174248 | -4.26445 | down |
| hsa-miR-4 | -1.70951 | 8.55978  | -2.89417 | 0.029643 | 0.174248 | -4.27956 | down |
| hsa-miR-1 | -1.87683 | 8.071928 | -5.67213 | 0.001605 | 0.027279 | -1.05347 | down |
| hsa-miR-6 | -1.96507 | 5.272728 | -3.27411 | 0.018595 | 0.174248 | -3.77319 | down |
| hsa-miR-4 | -2.21287 | 4.498193 | -3.58519 | 0.012905 | 0.134264 | -3.37247 | down |
| hsa-miR-4 | -2.22933 | 9.189867 | -2.934   | 0.0282   | 0.174248 | -4.22571 | down |
| hsa-miR-6 | -2.87494 | 4.512782 | -2.68331 | 0.038748 | 0.200249 | -4.56702 | down |
| hsa-miR-5 | -3.02564 | 4.246269 | -3.04479 | 0.024576 | 0.174248 | -4.07681 | down |
| hsa-miR-3 | -3.20729 | -1.53033 | -2.54607 | 0.046273 | 0.229302 | -4.75583 | down |
| hsa-miR-6 | -3.2252  | 5.25711  | -7.95206 | 0.000289 | 0.012919 | 0.851776 | down |
| hsa-miR-4 | -3.54565 | -1.36115 | -2.67296 | 0.039266 | 0.201628 | -4.58122 | down |
| hsa-miR-3 | -3.55133 | -1.35831 | -2.67399 | 0.039215 | 0.201628 | -4.57981 | down |
| hsa-miR-2 | -3.76267 | 0.295842 | -2.81005 | 0.032962 | 0.177841 | -4.39378 | down |
| hsa-miR-4 | -3.87546 | -1.19625 | -2.68421 | 0.038703 | 0.200249 | -4.56579 | down |
| hsa-miR-5 | -3.88615 | -1.1909  | -2.68318 | 0.038754 | 0.200249 | -4.5672  | down |
| hsa-miR-4 | -3.89259 | -1.18768 | -2.68253 | 0.038787 | 0.200249 | -4.5681  | down |
| hsa-miR-1 | -3.89675 | -1.1856  | -2.68209 | 0.038809 | 0.200249 | -4.56869 | down |
