# Supplementary material for: [Retracted] Shared Genetic and Epigenetic Mechanisms between the Osteogenic Differentiation of Dental Pulp Stem Cells and Bone Marrow Stem Cells
Source: Hindawi journal article supplement (doi:10.1155/2021/6697810), 2021-01-01
Supplement: f3 [file 6697810.f3.pdf]

| SUID  | AverageSh | Betweenne | ClosenessC | ClusteringC | Degree | Eccentricity | IsSingleNo | lab   | name       |
|-------|-----------|-----------|------------|-------------|--------|--------------|------------|-------|------------|
| 11819 | 2.496221  | 0.301148  | 0.400606   | 0           | 1358   | 3            | FALSE      | miRNA | hsa-miR-10 |
| 12062 | 2.431705  | 0.003363  | 0.411234   | 0           | 8      | 4            | FALSE      |       | BTG2       |
| 12152 | 2.517604  | 0.003716  | 0.397203   | 0           | 8      | 4            | FALSE      |       | CCND2      |
| 13314 | 2.449032  | 0.003768  | 0.408325   | 0           | 8      | 4            | FALSE      |       | NUFIP2     |
| 14098 | 2.231521  | 0.005344  | 0.448125   | 0           | 8      | 4            | FALSE      |       | THBS1      |
| 14272 | 2.587281  | 0.004042  | 0.386506   | 0           | 8      | 4            | FALSE      |       | UBN2       |
| 16035 | 2.589493  | 0.003609  | 0.386176   | 0           | 8      | 4            | FALSE      |       | GIGYF1     |
| 12150 | 2.485899  | 0.002815  | 0.402269   | 0           | 7      | 4            | FALSE      |       | CCND1      |
| 12846 | 2.426175  | 0.003724  | 0.412171   | 0           | 7      | 4            | FALSE      |       | IGF1R      |
| 12864 | 2.631152  | 0.00312   | 0.380062   | 0           | 7      | 4            | FALSE      |       | IREB2      |
| 13684 | 2.838341  | 0.002574  | 0.352318   | 0           | 7      | 4            | FALSE      |       | REL        |
| 14170 | 2.514286  | 0.002822  | 0.397727   | 0           | 7      | 4            | FALSE      |       | TNRC6A     |
| 14290 | 2.499171  | 0.002866  | 0.400133   | 0           | 7      | 4            | FALSE      |       | UHMK1      |
| 14959 | 2.519816  | 0.003737  | 0.396854   | 0           | 7      | 4            | FALSE      |       | MDM2       |
| 11850 | 2.52682   | 0.001899  | 0.395754   | 0           | 6      | 4            | FALSE      |       | ADAM10     |
| 12212 | 2.667281  | 0.001979  | 0.374914   | 0           | 6      | 4            | FALSE      |       | CDKN1A     |
| 12466 | 2.655853  | 0.001796  | 0.376527   | 0           | 6      | 4            | FALSE      |       | EIF4G2     |
| 12476 | 2.542304  | 0.001911  | 0.393344   | 0           | 6      | 4            | FALSE      |       | ELK4       |
| 12506 | 2.726636  | 0.001859  | 0.366752   | 0           | 6      | 4            | FALSE      |       | ETNK1      |
| 12798 | 2.652903  | 0.001945  | 0.376946   | 0           | 6      | 4            | FALSE      |       | HNRNPU     |
| 12800 | 2.610876  | 0.001817  | 0.383013   | 0           | 6      | 4            | FALSE      |       | HNRNPUL1   |
| 13010 | 2.652903  | 0.001945  | 0.376946   | 0           | 6      | 4            | FALSE      |       | LRRC58     |
| 13036 | 2.741382  | 0.001822  | 0.364779   | 0           | 6      | 4            | FALSE      |       | MAP1B      |
| 13230 | 2.780092  | 0.002673  | 0.3597     | 0           | 6      | 4            | FALSE      |       | NACC1      |
| 13360 | 2.901382  | 0.002215  | 0.344663   | 0           | 6      | 4            | FALSE      |       | PANK3      |
| 13530 | 2.437235  | 0.002245  | 0.410301   | 0           | 6      | 4            | FALSE      |       | PRDM2      |
| 13600 | 2.785622  | 0.002027  | 0.358986   | 0           | 6      | 4            | FALSE      |       | PURB       |
| 13688 | 2.652166  | 0.001623  | 0.37705    | 0           | 6      | 4            | FALSE      |       | REV3L      |
| 13762 | 2.823594  | 0.002115  | 0.354159   | 0           | 6      | 4            | FALSE      |       | RREB1      |
| 13830 | 2.652166  | 0.001623  | 0.37705    | 0           | 6      | 4            | FALSE      |       | SFT2D2     |
| 14076 | 2.52682   | 0.001899  | 0.395754   | 0           | 6      | 4            | FALSE      |       | TET3       |
| 14114 | 2.52682   | 0.001899  | 0.395754   | 0           | 6      | 4            | FALSE      |       | TMBIM6     |
| 14166 | 2.567373  | 0.002674  | 0.389503   | 0           | 6      | 4            | FALSE      |       | TNPO1      |
| 14460 | 2.627834  | 0.001775  | 0.380542   | 0           | 6      | 4            | FALSE      |       | ZNF264     |
| 14508 | 2.57106   | 0.001949  | 0.388945   | 0           | 6      | 4            | FALSE      |       | ZNF678     |
| 14560 | 2.781198  | 0.002859  | 0.359557   | 0           | 6      | 4            | FALSE      |       | ALDOA      |
| 14657 | 2.662488  | 0.00286   | 0.375588   | 0           | 6      | 4            | FALSE      |       | CCDC80     |
| 15029 | 3.205161  | 0.002464  | 0.311997   | 0           | 6      | 4            | FALSE      |       | NF2        |
| 15710 | 2.693456  | 0.001811  | 0.37127    | 0           | 6      | 4            | FALSE      |       | CBX6       |
| 15856 | 2.772719  | 0.001683  | 0.360657   | 0           | 6      | 4            | FALSE      |       | DDX21      |
| 11870 | 2.6153    | 0.001389  | 0.382365   | 0           | 5      | 4            | FALSE      |       | AGO1       |
| 11872 | 2.795207  | 0.002346  | 0.357755   | 0           | 5      | 4            | FALSE      |       | AGO3       |
| 11898 | 2.575853  | 0.001664  | 0.388221   | 0           | 5      | 4            | FALSE      |       | ANKRD17    |
| 12008 | 2.762765  | 0.001108  | 0.361956   | 0           | 5      | 4            | FALSE      |       | ATXN1L     |
| 12022 | 2.645899  | 0.002389  | 0.377943   | 0           | 5      | 4            | FALSE      |       | BAG5       |
| 12078 | 2.675392  | 0.001154  | 0.373777   | 0           | 5      | 4            | FALSE      |       | C16orf72   |

|       |          |          |          |   |   |         |           |
|-------|----------|----------|----------|---|---|---------|-----------|
| 12208 | 2.786359 | 0.001575 | 0.358891 | 0 | 5 | 4 FALSE | CDK6      |
| 12282 | 2.927558 | 0.001324 | 0.341582 | 0 | 5 | 4 FALSE | COL12A1   |
| 12284 | 2.763871 | 0.001399 | 0.361811 | 0 | 5 | 4 FALSE | COL5A2    |
| 12300 | 2.798894 | 0.001585 | 0.357284 | 0 | 5 | 4 FALSE | CPEB4     |
| 12444 | 2.97106  | 0.001075 | 0.33658  | 0 | 5 | 4 FALSE | EDEM3     |
| 12640 | 2.619355 | 0.002417 | 0.381773 | 0 | 5 | 4 FALSE | GAN       |
| 12724 | 2.721475 | 0.001191 | 0.367448 | 0 | 5 | 4 FALSE | GSK3B     |
| 12870 | 2.59318  | 0.002185 | 0.385627 | 0 | 5 | 4 FALSE | IRF4      |
| 12876 | 2.669493 | 0.001638 | 0.374603 | 0 | 5 | 4 FALSE | ITGB8     |
| 12888 | 3.013456 | 0.001293 | 0.331845 | 0 | 5 | 4 FALSE | JMJD1C    |
| 12948 | 2.815115 | 0.001068 | 0.355225 | 0 | 5 | 4 FALSE | KMT2C     |
| 12972 | 3.093456 | 0.001024 | 0.323263 | 0 | 5 | 4 FALSE | LCOR      |
| 12988 | 3.033364 | 0.001042 | 0.329667 | 0 | 5 | 4 FALSE | LMNB2     |
| 12990 | 2.97106  | 0.001075 | 0.33658  | 0 | 5 | 4 FALSE | LNPEP     |
| 13046 | 3.020461 | 0.000923 | 0.331075 | 0 | 5 | 4 FALSE | MAP3K7    |
| 13092 | 2.815115 | 0.001068 | 0.355225 | 0 | 5 | 4 FALSE | MED13     |
| 13138 | 2.762765 | 0.001108 | 0.361956 | 0 | 5 | 4 FALSE | MKLN1     |
| 13406 | 2.686452 | 0.002163 | 0.372238 | 0 | 5 | 4 FALSE | PEG10     |
| 13458 | 2.675392 | 0.001154 | 0.373777 | 0 | 5 | 4 FALSE | PLAG1     |
| 13554 | 2.589124 | 0.001677 | 0.386231 | 0 | 5 | 4 FALSE | PRRC2C    |
| 13716 | 2.568479 | 0.002056 | 0.389335 | 0 | 5 | 4 FALSE | RNF11     |
| 13738 | 2.721475 | 0.001191 | 0.367448 | 0 | 5 | 4 FALSE | RORA      |
| 13808 | 2.676129 | 0.001397 | 0.373674 | 0 | 5 | 4 FALSE | SECISBP2L |
| 13882 | 2.675392 | 0.001154 | 0.373777 | 0 | 5 | 4 FALSE | SLC38A1   |
| 13884 | 2.646267 | 0.001493 | 0.377891 | 0 | 5 | 4 FALSE | SLC38A2   |
| 14048 | 2.621935 | 0.001663 | 0.381398 | 0 | 5 | 4 FALSE | TAOK1     |
| 14054 | 3.057696 | 0.001632 | 0.327044 | 0 | 5 | 4 FALSE | TBC1D24   |
| 14056 | 2.641475 | 0.002234 | 0.378576 | 0 | 5 | 4 FALSE | TBL1XR1   |
| 14126 | 3.08977  | 0.001113 | 0.323649 | 0 | 5 | 4 FALSE | TMEM167/  |
| 14236 | 2.890691 | 0.001147 | 0.345938 | 0 | 5 | 4 FALSE | TULP4     |
| 14320 | 2.846083 | 0.001017 | 0.35136  | 0 | 5 | 4 FALSE | VANGL1    |
| 14368 | 2.567742 | 0.001511 | 0.389447 | 0 | 5 | 4 FALSE | YOD1      |
| 14440 | 2.809954 | 0.001195 | 0.355878 | 0 | 5 | 4 FALSE | ZNF12     |
| 14466 | 3.090507 | 0.001504 | 0.323572 | 0 | 5 | 4 FALSE | ZNF292    |
| 14470 | 2.762765 | 0.001108 | 0.361956 | 0 | 5 | 4 FALSE | ZNF367    |
| 14480 | 3.057696 | 0.001632 | 0.327044 | 0 | 5 | 4 FALSE | ZNF490    |
| 14582 | 2.818433 | 0.001676 | 0.354807 | 0 | 5 | 4 FALSE | ARPP19    |
| 15241 | 3.149862 | 0.002125 | 0.317474 | 0 | 5 | 4 FALSE | SLC7A5    |
| 15556 | 2.93788  | 0.001323 | 0.340381 | 0 | 5 | 4 FALSE | AKT1      |
| 15578 | 2.814009 | 0.001703 | 0.355365 | 0 | 5 | 4 FALSE | ANKRD52   |
| 15716 | 3.168295 | 0.00103  | 0.315627 | 0 | 5 | 4 FALSE | CCDC6     |
| 15782 | 3.113733 | 0.001285 | 0.321158 | 0 | 5 | 4 FALSE | COL1A1    |
| 16027 | 2.793364 | 0.001176 | 0.357991 | 0 | 5 | 4 FALSE | GATAD2B   |
| 16088 | 2.793364 | 0.001176 | 0.357991 | 0 | 5 | 4 FALSE | HEATR1    |
| 16303 | 3.229862 | 0.001026 | 0.309611 | 0 | 5 | 4 FALSE | MIDN      |
| 16342 | 3.221751 | 0.001096 | 0.31039  | 0 | 5 | 4 FALSE | MYO6      |
| 16642 | 2.85235  | 0.001132 | 0.350588 | 0 | 5 | 4 FALSE | SEC61A1   |

|       |          |          |          |   |   |         |         |
|-------|----------|----------|----------|---|---|---------|---------|
| 17593 | 2.889585 | 0.001414 | 0.34607  | 0 | 5 | 4 FALSE | GMFB    |
| 17770 | 2.959631 | 0.001228 | 0.33788  | 0 | 5 | 4 FALSE | MBD4    |
| 17947 | 2.996498 | 0.001019 | 0.333723 | 0 | 5 | 4 FALSE | PRPF8   |
| 18036 | 2.997972 | 0.001133 | 0.333559 | 0 | 5 | 4 FALSE | SESN3   |
| 18072 | 2.770507 | 0.001447 | 0.360945 | 0 | 5 | 4 FALSE | SMAD4   |
| 18372 | 2.888111 | 0.001108 | 0.346247 | 0 | 5 | 4 FALSE | ATP13A3 |
| 18411 | 2.997235 | 0.001098 | 0.333641 | 0 | 5 | 4 FALSE | BRWD1   |
| 18640 | 2.936406 | 0.001131 | 0.340552 | 0 | 5 | 4 FALSE | HERPUD1 |
| 18980 | 3.059539 | 0.001124 | 0.326847 | 0 | 5 | 4 FALSE | RAB2B   |
| 19053 | 2.941567 | 0.001188 | 0.339955 | 0 | 5 | 4 FALSE | SERTAD2 |
| 21745 | 3.025253 | 0.001955 | 0.330551 | 0 | 5 | 4 FALSE | REXO1   |
| 22381 | 2.989862 | 0.001259 | 0.334464 | 0 | 5 | 4 FALSE | YY1     |
| 11868 | 2.867465 | 0.000586 | 0.34874  | 0 | 4 | 4 FALSE | AGFG1   |
| 11910 | 2.828387 | 0.000954 | 0.353558 | 0 | 4 | 4 FALSE | AP1G1   |
| 11930 | 3.016406 | 0.000896 | 0.33152  | 0 | 4 | 4 FALSE | ARCN1   |
| 11938 | 2.846452 | 0.001357 | 0.351315 | 0 | 4 | 4 FALSE | ARHGAP1 |
| 11984 | 2.690138 | 0.001508 | 0.371728 | 0 | 4 | 4 FALSE | ATL2    |
| 12020 | 2.790415 | 0.000819 | 0.35837  | 0 | 4 | 4 FALSE | BACH1   |
| 12024 | 2.988387 | 0.000941 | 0.334629 | 0 | 4 | 4 FALSE | BAZ2A   |
| 12044 | 3.048848 | 0.001125 | 0.327993 | 0 | 4 | 4 FALSE | BICD2   |
| 12058 | 2.867465 | 0.000586 | 0.34874  | 0 | 4 | 4 FALSE | BTBD3   |
| 12060 | 2.75871  | 0.000984 | 0.362488 | 0 | 4 | 4 FALSE | BTBD7   |
| 12126 | 3.104885 | 0.000626 | 0.322073 | 0 | 4 | 4 FALSE | CAPN2   |
| 12140 | 2.669493 | 0.001059 | 0.374603 | 0 | 4 | 4 FALSE | CBX5    |
| 12176 | 2.930138 | 0.000801 | 0.341281 | 0 | 4 | 4 FALSE | CD44    |
| 12184 | 3.087189 | 0.00061  | 0.323919 | 0 | 4 | 4 FALSE | CD81    |
| 12190 | 2.833917 | 0.001417 | 0.352868 | 0 | 4 | 4 FALSE | CDC14B  |
| 12234 | 2.724793 | 0.001012 | 0.367    | 0 | 4 | 4 FALSE | CHD1    |
| 12272 | 2.759816 | 0.000833 | 0.362343 | 0 | 4 | 4 FALSE | CLTC    |
| 12280 | 2.774194 | 0.000998 | 0.360465 | 0 | 4 | 4 FALSE | CNOT6   |
| 12314 | 2.867465 | 0.000586 | 0.34874  | 0 | 4 | 4 FALSE | CSDE1   |
| 12322 | 3.035945 | 0.000708 | 0.329387 | 0 | 4 | 4 FALSE | CSNK1G3 |
| 12342 | 2.839447 | 0.000899 | 0.352181 | 0 | 4 | 4 FALSE | DAZAP2  |
| 12366 | 3.050323 | 0.000916 | 0.327834 | 0 | 4 | 4 FALSE | DDIT4   |
| 12372 | 2.860092 | 0.000985 | 0.349639 | 0 | 4 | 4 FALSE | DDX3X   |
| 12390 | 2.75871  | 0.000984 | 0.362488 | 0 | 4 | 4 FALSE | DICER1  |
| 12418 | 2.903226 | 0.001244 | 0.344444 | 0 | 4 | 4 FALSE | DR1     |
| 12426 | 2.669493 | 0.001059 | 0.374603 | 0 | 4 | 4 FALSE | DSTYK   |
| 12432 | 3.048848 | 0.000586 | 0.327993 | 0 | 4 | 4 FALSE | DYNLL2  |
| 12436 | 2.774194 | 0.000998 | 0.360465 | 0 | 4 | 4 FALSE | E2F3    |
| 12572 | 2.856037 | 0.000829 | 0.350136 | 0 | 4 | 4 FALSE | FBN1    |
| 12598 | 3.142488 | 0.001086 | 0.318219 | 0 | 4 | 4 FALSE | FKBP8   |
| 12630 | 2.718157 | 0.001074 | 0.367896 | 0 | 4 | 4 FALSE | FZD6    |
| 12634 | 3.104885 | 0.000626 | 0.322073 | 0 | 4 | 4 FALSE | G3BP1   |
| 12686 | 2.846452 | 0.001357 | 0.351315 | 0 | 4 | 4 FALSE | GNPTAB  |
| 12742 | 2.856037 | 0.000829 | 0.350136 | 0 | 4 | 4 FALSE | HBP1    |
| 12746 | 3.083502 | 0.000835 | 0.324307 | 0 | 4 | 4 FALSE | HDGF    |

|       |          |          |          |   |   |         |          |
|-------|----------|----------|----------|---|---|---------|----------|
| 12750 | 2.685714 | 0.00105  | 0.37234  | 0 | 4 | 4 FALSE | HECTD1   |
| 12770 | 2.867465 | 0.000586 | 0.34874  | 0 | 4 | 4 FALSE | HIPK1    |
| 12772 | 2.816959 | 0.000803 | 0.354993 | 0 | 4 | 4 FALSE | HIPK3    |
| 12788 | 3.048848 | 0.000586 | 0.327993 | 0 | 4 | 4 FALSE | HNRNPA2E |
| 12794 | 2.867465 | 0.000586 | 0.34874  | 0 | 4 | 4 FALSE | HNRNPF   |
| 12820 | 2.9047   | 0.000843 | 0.34427  | 0 | 4 | 4 FALSE | HSPA1A   |
| 12822 | 3.048848 | 0.000586 | 0.327993 | 0 | 4 | 4 FALSE | HSPA4L   |
| 12828 | 2.685714 | 0.00105  | 0.37234  | 0 | 4 | 4 FALSE | HUWE1    |
| 12908 | 3.048848 | 0.000586 | 0.327993 | 0 | 4 | 4 FALSE | KDM6B    |
| 12920 | 3.246452 | 0.000623 | 0.308029 | 0 | 4 | 4 FALSE | KIAA1586 |
| 12956 | 2.955576 | 0.000963 | 0.338344 | 0 | 4 | 4 FALSE | KPNA6    |
| 12958 | 2.892903 | 0.001004 | 0.345674 | 0 | 4 | 4 FALSE | KRT80    |
| 12970 | 3.087189 | 0.00061  | 0.323919 | 0 | 4 | 4 FALSE | LBR      |
| 12978 | 2.669493 | 0.001059 | 0.374603 | 0 | 4 | 4 FALSE | LIFR     |
| 13054 | 2.828387 | 0.000954 | 0.353558 | 0 | 4 | 4 FALSE | MAPK14   |
| 13074 | 2.807373 | 0.001023 | 0.356205 | 0 | 4 | 4 FALSE | MBD2     |
| 13076 | 2.75871  | 0.000984 | 0.362488 | 0 | 4 | 4 FALSE | MBD6     |
| 13120 | 2.867465 | 0.000586 | 0.34874  | 0 | 4 | 4 FALSE | MFSD6    |
| 13134 | 2.988387 | 0.000941 | 0.334629 | 0 | 4 | 4 FALSE | MKI67    |
| 13154 | 2.867465 | 0.000586 | 0.34874  | 0 | 4 | 4 FALSE | MOB1B    |
| 13234 | 2.774194 | 0.000998 | 0.360465 | 0 | 4 | 4 FALSE | NAP1L1   |
| 13240 | 2.754654 | 0.001453 | 0.363022 | 0 | 4 | 4 FALSE | NCKAP1   |
| 13286 | 3.01788  | 0.000816 | 0.331358 | 0 | 4 | 4 FALSE | NOTCH1   |
| 13300 | 2.718157 | 0.001074 | 0.367896 | 0 | 4 | 4 FALSE | NRAS     |
| 13308 | 3.048848 | 0.000586 | 0.327993 | 0 | 4 | 4 FALSE | NSD1     |
| 13312 | 2.912442 | 0.000795 | 0.343354 | 0 | 4 | 4 FALSE | NUCKS1   |
| 13322 | 3.124424 | 0.000941 | 0.320059 | 0 | 4 | 4 FALSE | NUPL2    |
| 13330 | 3.021935 | 0.001435 | 0.330914 | 0 | 4 | 4 FALSE | ORAI2    |
| 13340 | 2.669493 | 0.001059 | 0.374603 | 0 | 4 | 4 FALSE | OTUD4    |
| 13350 | 3.216221 | 0.000627 | 0.310924 | 0 | 4 | 4 FALSE | PABPN1   |
| 13402 | 2.972903 | 0.0014   | 0.336372 | 0 | 4 | 4 FALSE | PDZD8    |
| 13424 | 3.048848 | 0.000586 | 0.327993 | 0 | 4 | 4 FALSE | PHF3     |
| 13440 | 2.992811 | 0.001046 | 0.334134 | 0 | 4 | 4 FALSE | PIM1     |
| 13450 | 2.875945 | 0.000852 | 0.347712 | 0 | 4 | 4 FALSE | PJA2     |
| 13462 | 2.998341 | 0.0009   | 0.333518 | 0 | 4 | 4 FALSE | PLEKHA1  |
| 13512 | 2.669493 | 0.001059 | 0.374603 | 0 | 4 | 4 FALSE | PPP2R5E  |
| 13516 | 2.806636 | 0.001098 | 0.356298 | 0 | 4 | 4 FALSE | PPP3R1   |
| 13540 | 2.867465 | 0.000586 | 0.34874  | 0 | 4 | 4 FALSE | PRKAA1   |
| 13544 | 2.9047   | 0.000843 | 0.34427  | 0 | 4 | 4 FALSE | PRKCE    |
| 13570 | 3.048848 | 0.000586 | 0.327993 | 0 | 4 | 4 FALSE | PTBP3    |
| 13576 | 3.048848 | 0.000586 | 0.327993 | 0 | 4 | 4 FALSE | PTGS2    |
| 13616 | 2.828387 | 0.000954 | 0.353558 | 0 | 4 | 4 FALSE | RAB14    |
| 13634 | 2.892903 | 0.001004 | 0.345674 | 0 | 4 | 4 FALSE | RAD23B   |
| 13654 | 3.152074 | 0.000566 | 0.317251 | 0 | 4 | 4 FALSE | RAPH1    |
| 13676 | 2.778249 | 0.000953 | 0.359939 | 0 | 4 | 4 FALSE | RC3H2    |
| 13680 | 2.823594 | 0.001579 | 0.354159 | 0 | 4 | 4 FALSE | REEP3    |
| 13694 | 3.048848 | 0.000586 | 0.327993 | 0 | 4 | 4 FALSE | RFX7     |

|       |          |          |          |   |   |         |          |
|-------|----------|----------|----------|---|---|---------|----------|
| 13782 | 3.224332 | 0.000667 | 0.310142 | 0 | 4 | 4 FALSE | SCAF11   |
| 13820 | 2.952627 | 0.000957 | 0.338681 | 0 | 4 | 4 FALSE | SESN2    |
| 13864 | 3.124424 | 0.000941 | 0.320059 | 0 | 4 | 4 FALSE | SLC1A5   |
| 13874 | 3.048848 | 0.000586 | 0.327993 | 0 | 4 | 4 FALSE | SLC25A33 |
| 13954 | 2.712627 | 0.000813 | 0.368646 | 0 | 4 | 4 FALSE | SP3      |
| 13976 | 3.048848 | 0.000586 | 0.327993 | 0 | 4 | 4 FALSE | SQSTM1   |
| 13988 | 3.2      | 0.000825 | 0.3125   | 0 | 4 | 4 FALSE | SRSF1    |
| 14086 | 2.774194 | 0.000998 | 0.360465 | 0 | 4 | 4 FALSE | TGFBR2   |
| 14188 | 2.867465 | 0.000586 | 0.34874  | 0 | 4 | 4 FALSE | TPD52    |
| 14224 | 3.2      | 0.000825 | 0.3125   | 0 | 4 | 4 FALSE | TSPYL1   |
| 14246 | 3.152074 | 0.000566 | 0.317251 | 0 | 4 | 4 FALSE | TXNIP    |
| 14264 | 2.84977  | 0.000852 | 0.350906 | 0 | 4 | 4 FALSE | UBE2G1   |
| 14268 | 2.669493 | 0.001059 | 0.374603 | 0 | 4 | 4 FALSE | UBE2Z    |
| 14308 | 2.718157 | 0.001074 | 0.367896 | 0 | 4 | 4 FALSE | USP37    |
| 14338 | 2.797419 | 0.001088 | 0.357472 | 0 | 4 | 4 FALSE | VWA9     |
| 14344 | 2.869677 | 0.000793 | 0.348471 | 0 | 4 | 4 FALSE | WDR33    |
| 14350 | 2.690138 | 0.001508 | 0.371728 | 0 | 4 | 4 FALSE | WNK1     |
| 14358 | 2.690138 | 0.001508 | 0.371728 | 0 | 4 | 4 FALSE | XIAP     |
| 14372 | 2.809217 | 0.00096  | 0.355971 | 0 | 4 | 4 FALSE | YWHAG    |
| 14378 | 2.669493 | 0.001059 | 0.374603 | 0 | 4 | 4 FALSE | ZBTB18   |
| 14452 | 2.669493 | 0.001059 | 0.374603 | 0 | 4 | 4 FALSE | ZNF217   |
| 14476 | 2.718157 | 0.001074 | 0.367896 | 0 | 4 | 4 FALSE | ZNF451   |
| 14593 | 2.809954 | 0.001596 | 0.355878 | 0 | 4 | 4 FALSE | ATP6V0E1 |
| 14677 | 2.979908 | 0.001759 | 0.335581 | 0 | 4 | 4 FALSE | CEP104   |
| 14688 | 3.651613 | 0.000811 | 0.273852 | 0 | 4 | 4 FALSE | CKAP4    |
| 14749 | 3.022304 | 0.00157  | 0.330873 | 0 | 4 | 4 FALSE | DSEL     |
| 14759 | 3.030415 | 0.001009 | 0.329988 | 0 | 4 | 4 FALSE | EIF4EBP2 |
| 14890 | 3.030415 | 0.001009 | 0.329988 | 0 | 4 | 4 FALSE | ITPRIPL2 |
| 14900 | 2.933456 | 0.00138  | 0.340895 | 0 | 4 | 4 FALSE | KDELR1   |
| 14980 | 2.928295 | 0.001419 | 0.341496 | 0 | 4 | 4 FALSE | MIER3    |
| 15005 | 3.030415 | 0.001009 | 0.329988 | 0 | 4 | 4 FALSE | MTHFD1   |
| 15013 | 3.278157 | 0.001388 | 0.305049 | 0 | 4 | 4 FALSE | MYADM    |
| 15072 | 2.968111 | 0.001476 | 0.336915 | 0 | 4 | 4 FALSE | OTUD7B   |
| 15138 | 2.809954 | 0.001596 | 0.355878 | 0 | 4 | 4 FALSE | PSMA4    |
| 15146 | 2.809954 | 0.001596 | 0.355878 | 0 | 4 | 4 FALSE | PTEN     |
| 15257 | 3.623594 | 0.000874 | 0.275969 | 0 | 4 | 4 FALSE | SNRPD1   |
| 15279 | 3.087926 | 0.001408 | 0.323842 | 0 | 4 | 4 FALSE | STK4     |
| 15389 | 3.030415 | 0.001009 | 0.329988 | 0 | 4 | 4 FALSE | TXLNG    |
| 15444 | 3.030415 | 0.001009 | 0.329988 | 0 | 4 | 4 FALSE | ZNF117   |
| 15517 | 3.24977  | 0.000593 | 0.307714 | 0 | 4 | 4 FALSE | ABHD2    |
| 15543 | 2.809217 | 0.001066 | 0.355971 | 0 | 4 | 4 FALSE | AHNAK    |
| 15558 | 3.301014 | 0.000544 | 0.302937 | 0 | 4 | 4 FALSE | AKT2     |
| 15642 | 2.850138 | 0.000997 | 0.35086  | 0 | 4 | 4 FALSE | BAZ1B    |
| 15652 | 3.154654 | 0.000701 | 0.316992 | 0 | 4 | 4 FALSE | BCL2L13  |
| 15664 | 2.899171 | 0.001002 | 0.344926 | 0 | 4 | 4 FALSE | BRWD3    |
| 15687 | 2.809217 | 0.001066 | 0.355971 | 0 | 4 | 4 FALSE | CALD1    |
| 15689 | 2.92682  | 0.001113 | 0.341668 | 0 | 4 | 4 FALSE | CALM1    |

|       |          |          |          |   |   |         |          |
|-------|----------|----------|----------|---|---|---------|----------|
| 15748 | 2.921659 | 0.001    | 0.342271 | 0 | 4 | 4 FALSE | CELF1    |
| 15777 | 2.850138 | 0.000997 | 0.35086  | 0 | 4 | 4 FALSE | CNOT4    |
| 15786 | 3.198157 | 0.000981 | 0.31268  | 0 | 4 | 4 FALSE | COL5A1   |
| 15822 | 2.954101 | 0.000832 | 0.338512 | 0 | 4 | 4 FALSE | CTGF     |
| 15858 | 2.957788 | 0.001011 | 0.33809  | 0 | 4 | 4 FALSE | DDX6     |
| 15914 | 3.23576  | 0.000561 | 0.309046 | 0 | 4 | 4 FALSE | EIF4A3   |
| 15929 | 2.964793 | 0.000613 | 0.337292 | 0 | 4 | 4 FALSE | ELP2     |
| 16046 | 3.008664 | 0.000756 | 0.332373 | 0 | 4 | 4 FALSE | GLS      |
| 16114 | 3.491244 | 0.00103  | 0.286431 | 0 | 4 | 4 FALSE | HOOK3    |
| 16127 | 3.369585 | 0.000531 | 0.296772 | 0 | 4 | 4 FALSE | HSPH1    |
| 16306 | 2.931244 | 0.000875 | 0.341152 | 0 | 4 | 4 FALSE | MINK1    |
| 16321 | 3.135853 | 0.000884 | 0.318893 | 0 | 4 | 4 FALSE | MMP2     |
| 16362 | 3.053641 | 0.000858 | 0.327478 | 0 | 4 | 4 FALSE | NFIC     |
| 16408 | 3.23576  | 0.000561 | 0.309046 | 0 | 4 | 4 FALSE | OAZ1     |
| 16497 | 3.301014 | 0.000544 | 0.302937 | 0 | 4 | 4 FALSE | PPP1R11  |
| 16540 | 2.921659 | 0.001    | 0.342271 | 0 | 4 | 4 FALSE | QKI      |
| 16560 | 2.964793 | 0.000613 | 0.337292 | 0 | 4 | 4 FALSE | RASSF5   |
| 16579 | 3.23576  | 0.000561 | 0.309046 | 0 | 4 | 4 FALSE | RER1     |
| 16658 | 2.850138 | 0.000997 | 0.35086  | 0 | 4 | 4 FALSE | SF3B3    |
| 16711 | 3.233548 | 0.000724 | 0.309258 | 0 | 4 | 4 FALSE | SMAD3    |
| 16769 | 2.964793 | 0.000613 | 0.337292 | 0 | 4 | 4 FALSE | TAB2     |
| 16803 | 2.833917 | 0.000838 | 0.352868 | 0 | 4 | 4 FALSE | TLN1     |
| 16851 | 2.964793 | 0.000613 | 0.337292 | 0 | 4 | 4 FALSE | TRAK2    |
| 16855 | 2.964793 | 0.000613 | 0.337292 | 0 | 4 | 4 FALSE | TRIM26   |
| 16960 | 2.936037 | 0.000915 | 0.340595 | 0 | 4 | 4 FALSE | ZBTB4    |
| 17035 | 3.480553 | 0.00043  | 0.287311 | 0 | 4 | 4 FALSE | AAK1     |
| 17038 | 3.480553 | 0.00043  | 0.287311 | 0 | 4 | 4 FALSE | ABRACL   |
| 17044 | 3.557972 | 0.001019 | 0.281059 | 0 | 4 | 4 FALSE | AGO2     |
| 17075 | 3.567926 | 0.000656 | 0.280275 | 0 | 4 | 4 FALSE | CLSTN2   |
| 17255 | 3.047373 | 0.001005 | 0.328151 | 0 | 4 | 4 FALSE | ACTB     |
| 17466 | 2.905069 | 0.000992 | 0.344226 | 0 | 4 | 4 FALSE | DDX17    |
| 17498 | 3.48424  | 0.000459 | 0.287007 | 0 | 4 | 4 FALSE | EGFR     |
| 17522 | 3.019355 | 0.000646 | 0.331197 | 0 | 4 | 4 FALSE | ERBB4    |
| 17707 | 3.019355 | 0.000646 | 0.331197 | 0 | 4 | 4 FALSE | KDM5B    |
| 17744 | 3.29659  | 0.000609 | 0.303344 | 0 | 4 | 4 FALSE | LTA4H    |
| 17761 | 3.019355 | 0.000646 | 0.331197 | 0 | 4 | 4 FALSE | MAP3K5   |
| 18249 | 2.905069 | 0.000992 | 0.344226 | 0 | 4 | 4 FALSE | VGLL4    |
| 18278 | 3.367373 | 0.000563 | 0.296967 | 0 | 4 | 4 FALSE | ZDHHC16  |
| 18361 | 2.999078 | 0.000628 | 0.333436 | 0 | 4 | 4 FALSE | ARL8A    |
| 18366 | 2.999078 | 0.000628 | 0.333436 | 0 | 4 | 4 FALSE | ATG9A    |
| 18380 | 3.162396 | 0.000509 | 0.316216 | 0 | 4 | 4 FALSE | AZIN1    |
| 18419 | 2.999078 | 0.000628 | 0.333436 | 0 | 4 | 4 FALSE | C16orf52 |
| 18492 | 3.463226 | 0.000442 | 0.288748 | 0 | 4 | 4 FALSE | COPA     |
| 18533 | 3.107097 | 0.000885 | 0.321844 | 0 | 4 | 4 FALSE | DHX40    |
| 18591 | 2.999078 | 0.000628 | 0.333436 | 0 | 4 | 4 FALSE | FASTK    |
| 18593 | 3.351521 | 0.000519 | 0.298372 | 0 | 4 | 4 FALSE | FBXL19   |
| 18604 | 3.166083 | 0.000575 | 0.315848 | 0 | 4 | 4 FALSE | FXR1     |

|       |          |          |          |   |   |         |            |
|-------|----------|----------|----------|---|---|---------|------------|
| 18632 | 3.486452 | 0.000534 | 0.286825 | 0 | 4 | 4 FALSE | GXYLT2     |
| 18744 | 3.063226 | 0.000582 | 0.326453 | 0 | 4 | 4 FALSE | KLHL15     |
| 18810 | 3.107097 | 0.000885 | 0.321844 | 0 | 4 | 4 FALSE | MICAL2     |
| 18999 | 3.628756 | 0.000398 | 0.275577 | 0 | 4 | 4 FALSE | RBM26      |
| 19048 | 2.999078 | 0.000628 | 0.333436 | 0 | 4 | 4 FALSE | SERBP1     |
| 19106 | 3.125899 | 0.000621 | 0.319908 | 0 | 4 | 4 FALSE | SOX4       |
| 19138 | 3.154286 | 0.000649 | 0.317029 | 0 | 4 | 4 FALSE | STX12      |
| 19193 | 3.162396 | 0.000509 | 0.316216 | 0 | 4 | 4 FALSE | TP53INP1   |
| 19216 | 3.063226 | 0.000582 | 0.326453 | 0 | 4 | 4 FALSE | ULK1       |
| 19230 | 3.063226 | 0.000582 | 0.326453 | 0 | 4 | 4 FALSE | WASL       |
| 19238 | 3.121475 | 0.000585 | 0.320361 | 0 | 4 | 4 FALSE | YTHDF3     |
| 19907 | 2.930138 | 0.000774 | 0.341281 | 0 | 4 | 4 FALSE | XPO4       |
| 19921 | 3.129217 | 0.001065 | 0.319569 | 0 | 4 | 4 FALSE | ZNF107     |
| 20536 | 2.999447 | 0.000949 | 0.333395 | 0 | 4 | 4 FALSE | DGKH       |
| 21218 | 3.101567 | 0.001253 | 0.322418 | 0 | 4 | 4 FALSE | MDM4       |
| 11828 | 3.112258 | 0.000488 | 0.32131  | 0 | 3 | 4 FALSE | AASDHPPT   |
| 11830 | 2.957051 | 0.000784 | 0.338175 | 0 | 3 | 4 FALSE | ABCC5      |
| 11834 | 2.88     | 0.000526 | 0.347222 | 0 | 3 | 4 FALSE | ABHD17C    |
| 11836 | 3.393548 | 0.000408 | 0.294677 | 0 | 3 | 4 FALSE | ABT1       |
| 11838 | 3.050691 | 0.000509 | 0.327795 | 0 | 3 | 4 FALSE | ACLY       |
| 11842 | 2.921659 | 0.000485 | 0.342271 | 0 | 3 | 4 FALSE | ACSL4      |
| 11854 | 2.827281 | 0.000524 | 0.353697 | 0 | 3 | 4 FALSE | ADIPOR2    |
| 11888 | 2.860829 | 0.000535 | 0.349549 | 0 | 3 | 4 FALSE | AMMECR1    |
| 11902 | 2.887373 | 0.000864 | 0.346336 | 0 | 3 | 4 FALSE | ANKRD50    |
| 11916 | 3.050691 | 0.000509 | 0.327795 | 0 | 3 | 4 FALSE | AP3M1      |
| 11958 | 2.979908 | 0.000442 | 0.335581 | 0 | 3 | 4 FALSE | ARID4B     |
| 11960 | 3.112258 | 0.000488 | 0.32131  | 0 | 3 | 4 FALSE | ARID5B     |
| 11968 | 3.209217 | 0.000374 | 0.311603 | 0 | 3 | 4 FALSE | ARRDC4     |
| 11974 | 3.176774 | 0.000553 | 0.314785 | 0 | 3 | 4 FALSE | ASH1L      |
| 11976 | 2.907281 | 0.000352 | 0.343964 | 0 | 3 | 4 FALSE | ATAD1      |
| 11988 | 3.013825 | 0.000481 | 0.331804 | 0 | 3 | 4 FALSE | ATP11A     |
| 12066 | 2.860829 | 0.000535 | 0.349549 | 0 | 3 | 4 FALSE | BUB3       |
| 12076 | 2.979908 | 0.000442 | 0.335581 | 0 | 3 | 4 FALSE | C11orf30   |
| 12104 | 3.221751 | 0.000434 | 0.31039  | 0 | 3 | 4 FALSE | C7orf55-LL |
| 12122 | 2.907281 | 0.000352 | 0.343964 | 0 | 3 | 4 FALSE | CAMSAP1    |
| 12156 | 3.146175 | 0.000868 | 0.317846 | 0 | 3 | 4 FALSE | CCNG1      |
| 12162 | 2.907281 | 0.000352 | 0.343964 | 0 | 3 | 4 FALSE | CCNT2      |
| 12166 | 2.88     | 0.000526 | 0.347222 | 0 | 3 | 4 FALSE | CCT5       |
| 12180 | 2.860829 | 0.000535 | 0.349549 | 0 | 3 | 4 FALSE | CD47       |
| 12204 | 3.31871  | 0.000374 | 0.301322 | 0 | 3 | 4 FALSE | CDK17      |
| 12228 | 3.147281 | 0.000385 | 0.317735 | 0 | 3 | 4 FALSE | CFTR       |
| 12238 | 2.887373 | 0.000864 | 0.346336 | 0 | 3 | 4 FALSE | CHEK1      |
| 12264 | 2.897327 | 0.000385 | 0.345146 | 0 | 3 | 4 FALSE | CLIC4      |
| 12266 | 2.897327 | 0.000385 | 0.345146 | 0 | 3 | 4 FALSE | CLIP1      |
| 12292 | 3.082765 | 0.000394 | 0.324384 | 0 | 3 | 4 FALSE | COX2       |
| 12296 | 3.013825 | 0.000481 | 0.331804 | 0 | 3 | 4 FALSE | CPEB2      |
| 12298 | 3.154286 | 0.000459 | 0.317029 | 0 | 3 | 4 FALSE | CPEB3      |

|       |          |          |          |   |   |         |         |
|-------|----------|----------|----------|---|---|---------|---------|
| 12302 | 3.282949 | 0.000217 | 0.304604 | 0 | 3 | 4 FALSE | CPNE8   |
| 12336 | 3.087558 | 0.000768 | 0.323881 | 0 | 3 | 4 FALSE | CYP1B1  |
| 12350 | 2.975484 | 0.000558 | 0.33608  | 0 | 3 | 4 FALSE | DCAF7   |
| 12356 | 2.827281 | 0.000524 | 0.353697 | 0 | 3 | 4 FALSE | DCP2    |
| 12370 | 3.190783 | 0.00082  | 0.313403 | 0 | 3 | 4 FALSE | DDX19B  |
| 12388 | 3.070599 | 0.000502 | 0.325669 | 0 | 3 | 4 FALSE | DIAPH1  |
| 12408 | 3.146175 | 0.000868 | 0.317846 | 0 | 3 | 4 FALSE | DNAJC28 |
| 12414 | 3.282949 | 0.000217 | 0.304604 | 0 | 3 | 4 FALSE | DNM2    |
| 12422 | 3.276313 | 0.000347 | 0.305221 | 0 | 3 | 4 FALSE | DSC2    |
| 12450 | 3.105622 | 0.000526 | 0.321997 | 0 | 3 | 4 FALSE | EEF2    |
| 12470 | 3.290323 | 0.000424 | 0.303922 | 0 | 3 | 4 FALSE | ELAVL2  |
| 12478 | 3.050691 | 0.000509 | 0.327795 | 0 | 3 | 4 FALSE | EMP1    |
| 12480 | 2.975484 | 0.000558 | 0.33608  | 0 | 3 | 4 FALSE | EMP2    |
| 12484 | 3.070599 | 0.000502 | 0.325669 | 0 | 3 | 4 FALSE | ENPP2   |
| 12486 | 3.213641 | 0.000443 | 0.311174 | 0 | 3 | 4 FALSE | EP300   |
| 12508 | 3.345622 | 0.000573 | 0.298898 | 0 | 3 | 4 FALSE | EVI5    |
| 12512 | 2.860829 | 0.000535 | 0.349549 | 0 | 3 | 4 FALSE | EXOC5   |
| 12538 | 2.979908 | 0.000442 | 0.335581 | 0 | 3 | 4 FALSE | FAM217B |
| 12546 | 3.154286 | 0.000459 | 0.317029 | 0 | 3 | 4 FALSE | FAM69B  |
| 12554 | 3.282949 | 0.000217 | 0.304604 | 0 | 3 | 4 FALSE | FAM8A1  |
| 12556 | 3.003134 | 0.000549 | 0.332986 | 0 | 3 | 4 FALSE | FAM91A1 |
| 12566 | 2.897327 | 0.000385 | 0.345146 | 0 | 3 | 4 FALSE | FAS     |
| 12568 | 3.112258 | 0.000488 | 0.32131  | 0 | 3 | 4 FALSE | FASN    |
| 12576 | 3.282949 | 0.000217 | 0.304604 | 0 | 3 | 4 FALSE | FBXL3   |
| 12590 | 2.979908 | 0.000442 | 0.335581 | 0 | 3 | 4 FALSE | FGF2    |
| 12604 | 2.921659 | 0.000485 | 0.342271 | 0 | 3 | 4 FALSE | FMR1    |
| 12606 | 2.827281 | 0.000524 | 0.353697 | 0 | 3 | 4 FALSE | FNDC3A  |
| 12612 | 2.921659 | 0.000485 | 0.342271 | 0 | 3 | 4 FALSE | FOSL2   |
| 12620 | 2.860829 | 0.000535 | 0.349549 | 0 | 3 | 4 FALSE | FRMD6   |
| 12644 | 3.070599 | 0.000502 | 0.325669 | 0 | 3 | 4 FALSE | GATAD1  |
| 12714 | 2.921659 | 0.000485 | 0.342271 | 0 | 3 | 4 FALSE | GREB1L  |
| 12752 | 3.392074 | 0.000379 | 0.294805 | 0 | 3 | 4 FALSE | HECTD2  |
| 12768 | 3.070599 | 0.000502 | 0.325669 | 0 | 3 | 4 FALSE | HIF1AN  |
| 12784 | 2.827281 | 0.000524 | 0.353697 | 0 | 3 | 4 FALSE | HN1     |
| 12816 | 2.975484 | 0.000558 | 0.33608  | 0 | 3 | 4 FALSE | HSP90B1 |
| 12832 | 2.88     | 0.000526 | 0.347222 | 0 | 3 | 4 FALSE | ID4     |
| 12834 | 3.282949 | 0.000217 | 0.304604 | 0 | 3 | 4 FALSE | IER2    |
| 12838 | 3.112258 | 0.000488 | 0.32131  | 0 | 3 | 4 FALSE | IER5    |
| 12844 | 3.154286 | 0.000459 | 0.317029 | 0 | 3 | 4 FALSE | IFNGR2  |
| 12848 | 3.112258 | 0.000488 | 0.32131  | 0 | 3 | 4 FALSE | IGF2    |
| 12850 | 2.827281 | 0.000524 | 0.353697 | 0 | 3 | 4 FALSE | IGF2R   |
| 12860 | 3.112258 | 0.000488 | 0.32131  | 0 | 3 | 4 FALSE | INO80D  |
| 12862 | 2.88     | 0.000526 | 0.347222 | 0 | 3 | 4 FALSE | IPO7    |
| 12868 | 3.32424  | 0.000402 | 0.300821 | 0 | 3 | 4 FALSE | IRF2BP2 |
| 12892 | 3.282949 | 0.000217 | 0.304604 | 0 | 3 | 4 FALSE | JUN     |
| 12894 | 2.827281 | 0.000524 | 0.353697 | 0 | 3 | 4 FALSE | KANSL1  |
| 12906 | 2.827281 | 0.000524 | 0.353697 | 0 | 3 | 4 FALSE | KDM3B   |



|       |          |          |          |   |   |         |          |
|-------|----------|----------|----------|---|---|---------|----------|
| 12916 | 3.340829 | 0.000642 | 0.299327 | 0 | 3 | 4 FALSE | KIAA1456 |
| 12918 | 2.827281 | 0.000524 | 0.353697 | 0 | 3 | 4 FALSE | KIAA1551 |
| 12932 | 3.087558 | 0.000768 | 0.323881 | 0 | 3 | 4 FALSE | KIF5B    |
| 12938 | 2.887373 | 0.000864 | 0.346336 | 0 | 3 | 4 FALSE | KLF10    |
| 12964 | 2.979908 | 0.000442 | 0.335581 | 0 | 3 | 4 FALSE | LARP4    |
| 12982 | 3.221751 | 0.000434 | 0.31039  | 0 | 3 | 4 FALSE | LIN28B   |
| 13020 | 2.975484 | 0.000558 | 0.33608  | 0 | 3 | 4 FALSE | LZIC     |
| 13052 | 2.827281 | 0.000524 | 0.353697 | 0 | 3 | 4 FALSE | MAPK1    |
| 13086 | 3.154286 | 0.000459 | 0.317029 | 0 | 3 | 4 FALSE | MCL1     |
| 13100 | 2.827281 | 0.000524 | 0.353697 | 0 | 3 | 4 FALSE | MEF2D    |
| 13116 | 2.921659 | 0.000485 | 0.342271 | 0 | 3 | 4 FALSE | MEX3C    |
| 13128 | 2.921659 | 0.000485 | 0.342271 | 0 | 3 | 4 FALSE | MGRN1    |
| 13140 | 3.112258 | 0.000488 | 0.32131  | 0 | 3 | 4 FALSE | MKNK2    |
| 13146 | 2.827281 | 0.000524 | 0.353697 | 0 | 3 | 4 FALSE | MLLT10   |
| 13148 | 2.907281 | 0.000352 | 0.343964 | 0 | 3 | 4 FALSE | MMGT1    |
| 13188 | 2.860829 | 0.000535 | 0.349549 | 0 | 3 | 4 FALSE | MSMO1    |
| 13204 | 3.282949 | 0.000217 | 0.304604 | 0 | 3 | 4 FALSE | MTPN     |
| 13208 | 2.921659 | 0.000485 | 0.342271 | 0 | 3 | 4 FALSE | MYCN     |
| 13238 | 2.88     | 0.000526 | 0.347222 | 0 | 3 | 4 FALSE | NCBP2    |
| 13244 | 3.282949 | 0.000217 | 0.304604 | 0 | 3 | 4 FALSE | NDC1     |
| 13258 | 3.282949 | 0.000217 | 0.304604 | 0 | 3 | 4 FALSE | NEK7     |
| 13290 | 2.88     | 0.000526 | 0.347222 | 0 | 3 | 4 FALSE | NPTN     |
| 13292 | 3.070599 | 0.000502 | 0.325669 | 0 | 3 | 4 FALSE | NR1D2    |
| 13302 | 2.88     | 0.000526 | 0.347222 | 0 | 3 | 4 FALSE | NRIP1    |
| 13342 | 3.292535 | 0.000345 | 0.303717 | 0 | 3 | 4 FALSE | OTULIN   |
| 13352 | 2.88     | 0.000526 | 0.347222 | 0 | 3 | 4 FALSE | PAFAH1B1 |
| 13358 | 3.070599 | 0.000502 | 0.325669 | 0 | 3 | 4 FALSE | PANK1    |
| 13364 | 3.282949 | 0.000217 | 0.304604 | 0 | 3 | 4 FALSE | PAPOLA   |
| 13366 | 3.090138 | 0.000363 | 0.32361  | 0 | 3 | 4 FALSE | PAPPA    |
| 13372 | 2.860829 | 0.000535 | 0.349549 | 0 | 3 | 4 FALSE | PATL1    |
| 13384 | 3.393548 | 0.000408 | 0.294677 | 0 | 3 | 4 FALSE | PCNX     |
| 13410 | 2.979908 | 0.000442 | 0.335581 | 0 | 3 | 4 FALSE | PFN2     |
| 13442 | 2.827281 | 0.000524 | 0.353697 | 0 | 3 | 4 FALSE | PIP4K2A  |
| 13446 | 3.070599 | 0.000502 | 0.325669 | 0 | 3 | 4 FALSE | PISD     |
| 13454 | 3.403502 | 0.000443 | 0.293815 | 0 | 3 | 4 FALSE | PKN2     |
| 13460 | 3.070599 | 0.000502 | 0.325669 | 0 | 3 | 4 FALSE | PLEC     |
| 13486 | 2.827281 | 0.000524 | 0.353697 | 0 | 3 | 4 FALSE | POU2F1   |
| 13494 | 3.243871 | 0.000431 | 0.308274 | 0 | 3 | 4 FALSE | PPM1D    |
| 13500 | 2.827281 | 0.000524 | 0.353697 | 0 | 3 | 4 FALSE | PPP1R15B |
| 13504 | 2.827281 | 0.000524 | 0.353697 | 0 | 3 | 4 FALSE | PPP2R2A  |
| 13510 | 3.282949 | 0.000217 | 0.304604 | 0 | 3 | 4 FALSE | PPP2R5D  |
| 13532 | 2.860829 | 0.000535 | 0.349549 | 0 | 3 | 4 FALSE | PREPL    |
| 13556 | 2.860829 | 0.000535 | 0.349549 | 0 | 3 | 4 FALSE | PSAP     |
| 13586 | 2.827281 | 0.000524 | 0.353697 | 0 | 3 | 4 FALSE | PTPN4    |
| 13590 | 3.32424  | 0.000402 | 0.300821 | 0 | 3 | 4 FALSE | PTPRJ    |
| 13594 | 3.007189 | 0.000395 | 0.332536 | 0 | 3 | 4 FALSE | PUM1     |
| 13598 | 2.827281 | 0.000524 | 0.353697 | 0 | 3 | 4 FALSE | PURA     |

|       |          |          |          |   |   |         |           |
|-------|----------|----------|----------|---|---|---------|-----------|
| 13612 | 3.182673 | 0.000428 | 0.314201 | 0 | 3 | 4 FALSE | QSER1     |
| 13614 | 3.209217 | 0.000374 | 0.311603 | 0 | 3 | 4 FALSE | RAB11FIP1 |
| 13622 | 3.15871  | 0.000756 | 0.316585 | 0 | 3 | 4 FALSE | RAB33B    |
| 13632 | 3.141382 | 0.000416 | 0.318331 | 0 | 3 | 4 FALSE | RAC1      |
| 13642 | 2.957051 | 0.000784 | 0.338175 | 0 | 3 | 4 FALSE | RANBP6    |
| 13646 | 3.023779 | 0.000352 | 0.330712 | 0 | 3 | 4 FALSE | RAP1B     |
| 13648 | 2.979908 | 0.000442 | 0.335581 | 0 | 3 | 4 FALSE | RAP2B     |
| 13660 | 2.88     | 0.000526 | 0.347222 | 0 | 3 | 4 FALSE | RASA1     |
| 13664 | 3.105622 | 0.000526 | 0.321997 | 0 | 3 | 4 FALSE | RBBP7     |
| 13696 | 2.860829 | 0.000535 | 0.349549 | 0 | 3 | 4 FALSE | RGL1      |
| 13698 | 2.827281 | 0.000524 | 0.353697 | 0 | 3 | 4 FALSE | RGMB      |
| 13700 | 3.282949 | 0.000217 | 0.304604 | 0 | 3 | 4 FALSE | RHOA      |
| 13702 | 3.282949 | 0.000217 | 0.304604 | 0 | 3 | 4 FALSE | RIC1      |
| 13708 | 2.88     | 0.000526 | 0.347222 | 0 | 3 | 4 FALSE | RLIM      |
| 13734 | 3.253825 | 0.001232 | 0.307331 | 0 | 3 | 4 FALSE | RNF41     |
| 13736 | 2.979908 | 0.000442 | 0.335581 | 0 | 3 | 4 FALSE | RNF44     |
| 13740 | 2.921659 | 0.000485 | 0.342271 | 0 | 3 | 4 FALSE | RPA2      |
| 13770 | 2.827281 | 0.000524 | 0.353697 | 0 | 3 | 4 FALSE | RTN4      |
| 13778 | 2.827281 | 0.000524 | 0.353697 | 0 | 3 | 4 FALSE | SAMD8     |
| 13790 | 2.88     | 0.000526 | 0.347222 | 0 | 3 | 4 FALSE | SCARB2    |
| 13818 | 2.860829 | 0.000535 | 0.349549 | 0 | 3 | 4 FALSE | SERINC3   |
| 13822 | 3.011982 | 0.00044  | 0.332007 | 0 | 3 | 4 FALSE | SETD5     |
| 13838 | 3.050691 | 0.000509 | 0.327795 | 0 | 3 | 4 FALSE | SH3BP4    |
| 13846 | 2.887373 | 0.000864 | 0.346336 | 0 | 3 | 4 FALSE | SIX4      |
| 13870 | 3.254931 | 0.00041  | 0.307226 | 0 | 3 | 4 FALSE | SLC23A2   |
| 13896 | 3.050691 | 0.000509 | 0.327795 | 0 | 3 | 4 FALSE | SLC7A1    |
| 13906 | 3.141382 | 0.000416 | 0.318331 | 0 | 3 | 4 FALSE | SMAD2     |
| 13912 | 2.887373 | 0.000864 | 0.346336 | 0 | 3 | 4 FALSE | SMARCA5   |
| 13922 | 2.827281 | 0.000524 | 0.353697 | 0 | 3 | 4 FALSE | SMIM13    |
| 13934 | 3.282949 | 0.000217 | 0.304604 | 0 | 3 | 4 FALSE | SNRNP27   |
| 13948 | 2.88     | 0.000526 | 0.347222 | 0 | 3 | 4 FALSE | SOX11     |
| 14014 | 2.979908 | 0.000442 | 0.335581 | 0 | 3 | 4 FALSE | STX16     |
| 14024 | 3.246083 | 0.000552 | 0.308064 | 0 | 3 | 4 FALSE | SURF4     |
| 14046 | 3.105622 | 0.000526 | 0.321997 | 0 | 3 | 4 FALSE | TANK      |
| 14090 | 2.887373 | 0.000864 | 0.346336 | 0 | 3 | 4 FALSE | TGIF1     |
| 14092 | 3.290323 | 0.000424 | 0.303922 | 0 | 3 | 4 FALSE | TGIF2     |
| 14094 | 2.827281 | 0.000524 | 0.353697 | 0 | 3 | 4 FALSE | TGOLN2    |
| 14104 | 3.087558 | 0.000768 | 0.323881 | 0 | 3 | 4 FALSE | TIMM8A    |
| 14108 | 3.173456 | 0.000476 | 0.315114 | 0 | 3 | 4 FALSE | TJP1      |
| 14112 | 2.921659 | 0.000485 | 0.342271 | 0 | 3 | 4 FALSE | TM9SF3    |
| 14132 | 3.050691 | 0.000509 | 0.327795 | 0 | 3 | 4 FALSE | TMEM179I  |
| 14144 | 3.205161 | 0.000526 | 0.311997 | 0 | 3 | 4 FALSE | TMEM33    |
| 14154 | 3.182673 | 0.000428 | 0.314201 | 0 | 3 | 4 FALSE | TMPO      |
| 14162 | 2.979908 | 0.000442 | 0.335581 | 0 | 3 | 4 FALSE | TNKS      |
| 14172 | 2.827281 | 0.000524 | 0.353697 | 0 | 3 | 4 FALSE | TNRC6B    |
| 14176 | 3.154286 | 0.000459 | 0.317029 | 0 | 3 | 4 FALSE | TOB1      |
| 14202 | 3.182673 | 0.000428 | 0.314201 | 0 | 3 | 4 FALSE | TRIM71    |

|       |          |          |          |   |   |         |         |
|-------|----------|----------|----------|---|---|---------|---------|
| 14216 | 3.154286 | 0.000459 | 0.317029 | 0 | 3 | 4 FALSE | TSN     |
| 14222 | 3.302488 | 0.000353 | 0.302802 | 0 | 3 | 4 FALSE | TSPAN3  |
| 14232 | 3.112258 | 0.000488 | 0.32131  | 0 | 3 | 4 FALSE | TTYH3   |
| 14242 | 3.259724 | 0.000692 | 0.306774 | 0 | 3 | 4 FALSE | TVP23C  |
| 14244 | 3.259724 | 0.000692 | 0.306774 | 0 | 3 | 4 FALSE | TXNDC16 |
| 14248 | 2.921659 | 0.000485 | 0.342271 | 0 | 3 | 4 FALSE | UBAC2   |
| 14250 | 2.860829 | 0.000535 | 0.349549 | 0 | 3 | 4 FALSE | UBE2A   |
| 14284 | 2.88     | 0.000526 | 0.347222 | 0 | 3 | 4 FALSE | UGCG    |
| 14298 | 3.154286 | 0.000459 | 0.317029 | 0 | 3 | 4 FALSE | USP22   |
| 14324 | 2.860829 | 0.000535 | 0.349549 | 0 | 3 | 4 FALSE | VAPB    |
| 14330 | 3.141382 | 0.000416 | 0.318331 | 0 | 3 | 4 FALSE | VEGFA   |
| 14334 | 3.112258 | 0.000488 | 0.32131  | 0 | 3 | 4 FALSE | VEZT    |
| 14346 | 3.282949 | 0.000217 | 0.304604 | 0 | 3 | 4 FALSE | WDR36   |
| 14354 | 3.146175 | 0.000868 | 0.317846 | 0 | 3 | 4 FALSE | WSB1    |
| 14356 | 3.023779 | 0.000352 | 0.330712 | 0 | 3 | 4 FALSE | WTAP    |
| 14374 | 3.173456 | 0.000476 | 0.315114 | 0 | 3 | 4 FALSE | ZBED4   |
| 14392 | 3.070599 | 0.000502 | 0.325669 | 0 | 3 | 4 FALSE | ZC3H11A |
| 14402 | 3.259724 | 0.000692 | 0.306774 | 0 | 3 | 4 FALSE | ZDHHC24 |
| 14406 | 3.243871 | 0.000431 | 0.308274 | 0 | 3 | 4 FALSE | ZEB1    |
| 14408 | 3.173456 | 0.000476 | 0.315114 | 0 | 3 | 4 FALSE | ZEB2    |
| 14412 | 2.827281 | 0.000524 | 0.353697 | 0 | 3 | 4 FALSE | ZFH3    |
| 14416 | 3.249401 | 0.000392 | 0.307749 | 0 | 3 | 4 FALSE | ZFP36L2 |
| 14424 | 2.975484 | 0.000558 | 0.33608  | 0 | 3 | 4 FALSE | ZFP91   |
| 14448 | 3.282949 | 0.000217 | 0.304604 | 0 | 3 | 4 FALSE | ZNF197  |
| 14456 | 3.282949 | 0.000217 | 0.304604 | 0 | 3 | 4 FALSE | ZNF24   |
| 14458 | 3.282949 | 0.000217 | 0.304604 | 0 | 3 | 4 FALSE | ZNF260  |
| 14472 | 2.979908 | 0.000442 | 0.335581 | 0 | 3 | 4 FALSE | ZNF430  |
| 14492 | 2.827281 | 0.000524 | 0.353697 | 0 | 3 | 4 FALSE | ZNF618  |
| 14494 | 3.154286 | 0.000459 | 0.317029 | 0 | 3 | 4 FALSE | ZNF623  |
| 14530 | 3.087558 | 0.000768 | 0.323881 | 0 | 3 | 4 FALSE | ZSCAN22 |
| 14541 | 3.153917 | 0.000818 | 0.317066 | 0 | 3 | 4 FALSE | ABC7    |
| 14545 | 3.548756 | 0.000403 | 0.281789 | 0 | 3 | 4 FALSE | ABHD17B |
| 14558 | 3.480184 | 0.000689 | 0.287341 | 0 | 3 | 4 FALSE | ALDH9A1 |
| 14599 | 3.548756 | 0.000403 | 0.281789 | 0 | 3 | 4 FALSE | AVL9    |
| 14609 | 3.090507 | 0.000901 | 0.323572 | 0 | 3 | 4 FALSE | BMP3    |
| 14635 | 3.617327 | 0.000512 | 0.276447 | 0 | 3 | 4 FALSE | CACNG8  |
| 14666 | 3.305069 | 0.000794 | 0.302566 | 0 | 3 | 4 FALSE | CD28    |
| 14694 | 3.153917 | 0.000818 | 0.317066 | 0 | 3 | 4 FALSE | CNBP    |
| 14740 | 3.548756 | 0.000403 | 0.281789 | 0 | 3 | 4 FALSE | DNAJB4  |
| 14775 | 3.548756 | 0.000403 | 0.281789 | 0 | 3 | 4 FALSE | EVC     |
| 14807 | 3.480184 | 0.000689 | 0.287341 | 0 | 3 | 4 FALSE | FUS     |
| 14821 | 3.693272 | 0.000385 | 0.270763 | 0 | 3 | 4 FALSE | GJC1    |
| 14825 | 3.542488 | 0.000639 | 0.282287 | 0 | 3 | 4 FALSE | GK5     |
| 14829 | 3.470599 | 0.000617 | 0.288135 | 0 | 3 | 4 FALSE | GLG1    |
| 14835 | 3.47318  | 0.000775 | 0.287921 | 0 | 3 | 4 FALSE | GNS     |
| 14865 | 3.510783 | 0.000725 | 0.284837 | 0 | 3 | 4 FALSE | HP1BP3  |
| 14873 | 3.568295 | 0.000516 | 0.280246 | 0 | 3 | 4 FALSE | IFIT3   |

|       |          |          |          |   |   |         |          |
|-------|----------|----------|----------|---|---|---------|----------|
| 14875 | 3.56129  | 0.000622 | 0.280797 | 0 | 3 | 4 FALSE | IFNLR1   |
| 14896 | 3.090507 | 0.000901 | 0.323572 | 0 | 3 | 4 FALSE | KATNAL1  |
| 14906 | 3.712442 | 0.000413 | 0.269364 | 0 | 3 | 4 FALSE | KIF18B   |
| 14914 | 2.98765  | 0.00086  | 0.334711 | 0 | 3 | 4 FALSE | KLHL11   |
| 14931 | 3.200737 | 0.000752 | 0.312428 | 0 | 3 | 4 FALSE | LIN9     |
| 14935 | 3.427097 | 0.000653 | 0.291792 | 0 | 3 | 4 FALSE | LIX1L    |
| 14982 | 3.090507 | 0.000901 | 0.323572 | 0 | 3 | 4 FALSE | MIGA1    |
| 15074 | 3.090507 | 0.000901 | 0.323572 | 0 | 3 | 4 FALSE | PABPC1   |
| 15093 | 3.02341  | 0.000972 | 0.330752 | 0 | 3 | 4 FALSE | PHF12    |
| 15130 | 3.47318  | 0.000775 | 0.287921 | 0 | 3 | 4 FALSE | PRPS1    |
| 15176 | 3.548756 | 0.000403 | 0.281789 | 0 | 3 | 4 FALSE | RGS9BP   |
| 15180 | 3.548756 | 0.000403 | 0.281789 | 0 | 3 | 4 FALSE | RHPN2    |
| 15202 | 3.153917 | 0.000818 | 0.317066 | 0 | 3 | 4 FALSE | S1PR2    |
| 15218 | 3.497512 | 0.000753 | 0.285918 | 0 | 3 | 4 FALSE | SH2B3    |
| 15220 | 3.56129  | 0.000622 | 0.280797 | 0 | 3 | 4 FALSE | SHOC2    |
| 15263 | 3.548756 | 0.000699 | 0.281789 | 0 | 3 | 4 FALSE | SRPX2    |
| 15269 | 3.555392 | 0.000663 | 0.281263 | 0 | 3 | 4 FALSE | SSBP2    |
| 15302 | 3.153917 | 0.000818 | 0.317066 | 0 | 3 | 4 FALSE | TANGO2   |
| 15309 | 3.425622 | 0.000658 | 0.291918 | 0 | 3 | 4 FALSE | TFDP2    |
| 15336 | 3.497512 | 0.000753 | 0.285918 | 0 | 3 | 4 FALSE | TMEM170A |
| 15397 | 3.505991 | 0.000695 | 0.285226 | 0 | 3 | 4 FALSE | UBXN2A   |
| 15403 | 3.432995 | 0.000593 | 0.291291 | 0 | 3 | 4 FALSE | UHRF1BP1 |
| 15412 | 3.465438 | 0.000573 | 0.288564 | 0 | 3 | 4 FALSE | VGLL3    |
| 15425 | 3.730138 | 0.000528 | 0.268087 | 0 | 3 | 4 FALSE | XKR4     |
| 15465 | 3.388018 | 0.000668 | 0.295158 | 0 | 3 | 4 FALSE | ZNF43    |
| 15480 | 3.465438 | 0.000573 | 0.288564 | 0 | 3 | 4 FALSE | ZNF573   |
| 15521 | 3.261198 | 0.000472 | 0.306636 | 0 | 3 | 4 FALSE | ABL2     |
| 15552 | 3.443687 | 0.000198 | 0.290386 | 0 | 3 | 4 FALSE | AKAP8    |
| 15560 | 3.443687 | 0.000198 | 0.290386 | 0 | 3 | 4 FALSE | ALG10B   |
| 15575 | 2.979539 | 0.000548 | 0.335622 | 0 | 3 | 4 FALSE | ANKRD12  |
| 15588 | 2.979539 | 0.000548 | 0.335622 | 0 | 3 | 4 FALSE | AP2B1    |
| 15602 | 3.128848 | 0.000377 | 0.319606 | 0 | 3 | 4 FALSE | ARL8B    |
| 15606 | 3.347097 | 0.000334 | 0.298766 | 0 | 3 | 4 FALSE | ARPC5    |
| 15636 | 3.018986 | 0.000527 | 0.331237 | 0 | 3 | 4 FALSE | ATXN7L3B |
| 15644 | 3.381014 | 0.000826 | 0.295769 | 0 | 3 | 4 FALSE | BBC3     |
| 15660 | 2.979539 | 0.000548 | 0.335622 | 0 | 3 | 4 FALSE | BRAF     |
| 15666 | 3.077972 | 0.000512 | 0.324889 | 0 | 3 | 4 FALSE | BTF3L4   |
| 15669 | 3.310599 | 0.000426 | 0.30206  | 0 | 3 | 4 FALSE | C11orf68 |
| 15691 | 3.310599 | 0.000426 | 0.30206  | 0 | 3 | 4 FALSE | CALM3    |
| 15712 | 3.443687 | 0.000198 | 0.290386 | 0 | 3 | 4 FALSE | CCDC117  |
| 15734 | 3.443687 | 0.000198 | 0.290386 | 0 | 3 | 4 FALSE | CD84     |
| 15736 | 3.443687 | 0.000198 | 0.290386 | 0 | 3 | 4 FALSE | CDC25B   |
| 15741 | 3.443687 | 0.000198 | 0.290386 | 0 | 3 | 4 FALSE | CDC73    |
| 15743 | 3.327558 | 0.000448 | 0.300521 | 0 | 3 | 4 FALSE | CDK4     |
| 15759 | 2.957788 | 0.000551 | 0.33809  | 0 | 3 | 4 FALSE | CHERP    |
| 15761 | 3.418618 | 0.00037  | 0.292516 | 0 | 3 | 4 FALSE | CHPF2    |
| 15784 | 2.979539 | 0.000548 | 0.335622 | 0 | 3 | 4 FALSE | COL3A1   |

|       |          |          |          |   |   |         |          |
|-------|----------|----------|----------|---|---|---------|----------|
| 15803 | 3.00682  | 0.000388 | 0.332577 | 0 | 3 | 4 FALSE | CREB3L2  |
| 15805 | 2.957788 | 0.000551 | 0.33809  | 0 | 3 | 4 FALSE | CREBRF   |
| 15812 | 3.375484 | 0.00043  | 0.296254 | 0 | 3 | 4 FALSE | CRTC3    |
| 15872 | 3.545069 | 0.000558 | 0.282082 | 0 | 3 | 4 FALSE | DNTTIP2  |
| 15966 | 2.979539 | 0.000548 | 0.335622 | 0 | 3 | 4 FALSE | FAM46C   |
| 15986 | 2.957788 | 0.000551 | 0.33809  | 0 | 3 | 4 FALSE | FGFR10P  |
| 16005 | 3.261198 | 0.000472 | 0.306636 | 0 | 3 | 4 FALSE | FSCN1    |
| 16037 | 3.409401 | 0.000504 | 0.293307 | 0 | 3 | 4 FALSE | GJD2     |
| 16052 | 3.018986 | 0.000527 | 0.331237 | 0 | 3 | 4 FALSE | GNB2L1   |
| 16080 | 3.443687 | 0.000198 | 0.290386 | 0 | 3 | 4 FALSE | HAAO     |
| 16132 | 3.443687 | 0.000198 | 0.290386 | 0 | 3 | 4 FALSE | HYOU1    |
| 16145 | 3.400922 | 0.000504 | 0.294038 | 0 | 3 | 4 FALSE | IGFBP5   |
| 16159 | 2.979539 | 0.000548 | 0.335622 | 0 | 3 | 4 FALSE | IRS1     |
| 16161 | 3.443687 | 0.000198 | 0.290386 | 0 | 3 | 4 FALSE | ISG20L2  |
| 16163 | 2.979539 | 0.000548 | 0.335622 | 0 | 3 | 4 FALSE | ITGB1    |
| 16167 | 2.979539 | 0.000548 | 0.335622 | 0 | 3 | 4 FALSE | IVNS1ABP |
| 16173 | 3.018986 | 0.000527 | 0.331237 | 0 | 3 | 4 FALSE | JARID2   |
| 16217 | 3.310599 | 0.000426 | 0.30206  | 0 | 3 | 4 FALSE | KMT2D    |
| 16235 | 3.424147 | 0.000358 | 0.292044 | 0 | 3 | 4 FALSE | LIMK1    |
| 16325 | 3.443687 | 0.000198 | 0.290386 | 0 | 3 | 4 FALSE | MOB1A    |
| 16372 | 3.561659 | 0.00043  | 0.280768 | 0 | 3 | 4 FALSE | NLGN2    |
| 16404 | 3.443687 | 0.000198 | 0.290386 | 0 | 3 | 4 FALSE | NUP153   |
| 16421 | 3.018986 | 0.000527 | 0.331237 | 0 | 3 | 4 FALSE | PACS1    |
| 16423 | 2.957788 | 0.000551 | 0.33809  | 0 | 3 | 4 FALSE | PAFAH1B2 |
| 16444 | 3.347097 | 0.000334 | 0.298766 | 0 | 3 | 4 FALSE | PDGFRA   |
| 16448 | 3.443687 | 0.000198 | 0.290386 | 0 | 3 | 4 FALSE | PDP1     |
| 16472 | 2.957788 | 0.000551 | 0.33809  | 0 | 3 | 4 FALSE | PLAU     |
| 16512 | 2.957788 | 0.000551 | 0.33809  | 0 | 3 | 4 FALSE | PROSER1  |
| 16528 | 2.979539 | 0.000548 | 0.335622 | 0 | 3 | 4 FALSE | PTP4A1   |
| 16590 | 3.117419 | 0.000532 | 0.320778 | 0 | 3 | 4 FALSE | RICTOR   |
| 16599 | 3.060277 | 0.000841 | 0.326768 | 0 | 3 | 4 FALSE | RNF125   |
| 16651 | 3.327558 | 0.000448 | 0.300521 | 0 | 3 | 4 FALSE | SERPINE1 |
| 16730 | 2.979539 | 0.000548 | 0.335622 | 0 | 3 | 4 FALSE | SON      |
| 16739 | 3.261198 | 0.000472 | 0.306636 | 0 | 3 | 4 FALSE | SPTBN1   |
| 16750 | 3.443687 | 0.000198 | 0.290386 | 0 | 3 | 4 FALSE | SRSF11   |
| 16757 | 3.281106 | 0.00034  | 0.304775 | 0 | 3 | 4 FALSE | STRAP    |
| 16784 | 3.443687 | 0.000198 | 0.290386 | 0 | 3 | 4 FALSE | TCF20    |
| 16805 | 2.996498 | 0.000421 | 0.333723 | 0 | 3 | 4 FALSE | TLR2     |
| 16812 | 3.115207 | 0.000475 | 0.321006 | 0 | 3 | 4 FALSE | TMED2    |
| 16815 | 3.443687 | 0.000198 | 0.290386 | 0 | 3 | 4 FALSE | TMEM101  |
| 16825 | 3.443687 | 0.000198 | 0.290386 | 0 | 3 | 4 FALSE | TMEM214  |
| 16827 | 3.018986 | 0.000527 | 0.331237 | 0 | 3 | 4 FALSE | TMEM245  |
| 16829 | 3.117419 | 0.000532 | 0.320778 | 0 | 3 | 4 FALSE | TMEM248  |
| 16837 | 2.979539 | 0.000548 | 0.335622 | 0 | 3 | 4 FALSE | TNFAIP3  |
| 16847 | 3.381014 | 0.000826 | 0.295769 | 0 | 3 | 4 FALSE | TPM3     |
| 16903 | 3.443687 | 0.000198 | 0.290386 | 0 | 3 | 4 FALSE | USP54    |
| 16958 | 2.957788 | 0.000551 | 0.33809  | 0 | 3 | 4 FALSE | ZBTB37   |

|       |          |          |          |   |   |         |          |
|-------|----------|----------|----------|---|---|---------|----------|
| 16975 | 3.080922 | 0.000571 | 0.324578 | 0 | 3 | 4 FALSE | ZFAND5   |
| 16990 | 3.018986 | 0.000527 | 0.331237 | 0 | 3 | 4 FALSE | ZMYND11  |
| 17000 | 3.413088 | 0.000344 | 0.29299  | 0 | 3 | 4 FALSE | ZNF281   |
| 17007 | 3.456221 | 0.000607 | 0.289333 | 0 | 3 | 4 FALSE | ZNF426   |
| 17065 | 3.688479 | 0.000137 | 0.271114 | 0 | 3 | 4 FALSE | CDC23    |
| 17078 | 3.176774 | 0.00039  | 0.314785 | 0 | 3 | 4 FALSE | COL1A2   |
| 17098 | 3.176774 | 0.00039  | 0.314785 | 0 | 3 | 4 FALSE | FN1      |
| 17104 | 3.176774 | 0.00039  | 0.314785 | 0 | 3 | 4 FALSE | GDA      |
| 17111 | 3.692903 | 0.000191 | 0.27079  | 0 | 3 | 4 FALSE | GLUD2    |
| 17131 | 3.203318 | 0.000293 | 0.312176 | 0 | 3 | 4 FALSE | MACF1    |
| 17144 | 3.675207 | 0.000242 | 0.272093 | 0 | 3 | 4 FALSE | OGT      |
| 17159 | 3.698433 | 0.000304 | 0.270385 | 0 | 3 | 4 FALSE | POTED    |
| 17194 | 3.176774 | 0.00039  | 0.314785 | 0 | 3 | 4 FALSE | SLC6A8   |
| 17199 | 3.617696 | 0.00032  | 0.276419 | 0 | 3 | 4 FALSE | SOD2     |
| 17213 | 3.203318 | 0.000293 | 0.312176 | 0 | 3 | 4 FALSE | TPM1     |
| 17226 | 3.688479 | 0.000137 | 0.271114 | 0 | 3 | 4 FALSE | ZC3H10   |
| 17298 | 3.558341 | 0.000425 | 0.28103  | 0 | 3 | 4 FALSE | APOPT1   |
| 17332 | 3.171982 | 0.000535 | 0.31526  | 0 | 3 | 4 FALSE | BMP2     |
| 17361 | 3.079816 | 0.000509 | 0.324695 | 0 | 3 | 4 FALSE | CAV1     |
| 17376 | 3.079816 | 0.000509 | 0.324695 | 0 | 3 | 4 FALSE | CCPG1    |
| 17453 | 3.181567 | 0.000426 | 0.314311 | 0 | 3 | 4 FALSE | CUL5     |
| 17459 | 3.443318 | 0.000441 | 0.290418 | 0 | 3 | 4 FALSE | DDI2     |
| 17478 | 3.377327 | 0.000422 | 0.296092 | 0 | 3 | 4 FALSE | DLC1     |
| 17528 | 3.512627 | 0.000234 | 0.284687 | 0 | 3 | 4 FALSE | ERRFI1   |
| 17562 | 3.512627 | 0.000234 | 0.284687 | 0 | 3 | 4 FALSE | FLI1     |
| 17569 | 3.63318  | 0.000545 | 0.275241 | 0 | 3 | 4 FALSE | FOXK1    |
| 17726 | 3.171982 | 0.000535 | 0.31526  | 0 | 3 | 4 FALSE | LARP1    |
| 17730 | 3.017143 | 0.000562 | 0.331439 | 0 | 3 | 4 FALSE | LDLR     |
| 17746 | 3.504516 | 0.000449 | 0.285346 | 0 | 3 | 4 FALSE | LYPLA2   |
| 17811 | 3.079816 | 0.000509 | 0.324695 | 0 | 3 | 4 FALSE | MYC      |
| 17909 | 3.570507 | 0.000356 | 0.280072 | 0 | 3 | 4 FALSE | PDGFRB   |
| 17922 | 3.512627 | 0.000234 | 0.284687 | 0 | 3 | 4 FALSE | PLEKHM1  |
| 17930 | 3.377327 | 0.000422 | 0.296092 | 0 | 3 | 4 FALSE | PODXL    |
| 17954 | 3.512627 | 0.000234 | 0.284687 | 0 | 3 | 4 FALSE | PSMD3    |
| 17997 | 3.079816 | 0.000509 | 0.324695 | 0 | 3 | 4 FALSE | RNF24    |
| 18032 | 3.512627 | 0.000234 | 0.284687 | 0 | 3 | 4 FALSE | SERPINB9 |
| 18047 | 3.143594 | 0.000574 | 0.318107 | 0 | 3 | 4 FALSE | SIPA1L1  |
| 18060 | 3.512627 | 0.000234 | 0.284687 | 0 | 3 | 4 FALSE | SLC26A2  |
| 18096 | 3.409401 | 0.000365 | 0.293307 | 0 | 3 | 4 FALSE | SOX2     |
| 18115 | 3.017143 | 0.000562 | 0.331439 | 0 | 3 | 4 FALSE | SREBF1   |
| 18122 | 3.512627 | 0.000234 | 0.284687 | 0 | 3 | 4 FALSE | STAT1    |
| 18124 | 3.653456 | 0.000385 | 0.273713 | 0 | 3 | 4 FALSE | STAT3    |
| 18140 | 3.017143 | 0.000562 | 0.331439 | 0 | 3 | 4 FALSE | TACC1    |
| 18243 | 3.512627 | 0.000234 | 0.284687 | 0 | 3 | 4 FALSE | UTP15    |
| 18267 | 3.649401 | 0.000608 | 0.274018 | 0 | 3 | 4 FALSE | YES1     |
| 18273 | 3.512627 | 0.000234 | 0.284687 | 0 | 3 | 4 FALSE | ZBTB33   |
| 18301 | 3.079816 | 0.000509 | 0.324695 | 0 | 3 | 4 FALSE | ZNF644   |

|       |          |          |          |   |   |         |          |
|-------|----------|----------|----------|---|---|---------|----------|
| 18306 | 3.079816 | 0.000509 | 0.324695 | 0 | 3 | 4 FALSE | ZNF772   |
| 18310 | 3.512627 | 0.000234 | 0.284687 | 0 | 3 | 4 FALSE | ZSWIM4   |
| 18316 | 3.712811 | 0.000279 | 0.269338 | 0 | 3 | 4 FALSE | ABL1     |
| 18325 | 3.490876 | 0.000212 | 0.286461 | 0 | 3 | 4 FALSE | ACTL6A   |
| 18330 | 3.644608 | 0.000195 | 0.274378 | 0 | 3 | 4 FALSE | ADD1     |
| 18332 | 3.18894  | 0.000219 | 0.313584 | 0 | 3 | 4 FALSE | AEN      |
| 18353 | 3.18894  | 0.000219 | 0.313584 | 0 | 3 | 4 FALSE | AP3S2    |
| 18370 | 3.18894  | 0.000219 | 0.313584 | 0 | 3 | 4 FALSE | ATP11B   |
| 18374 | 3.490876 | 0.000212 | 0.286461 | 0 | 3 | 4 FALSE | ATP5G2   |
| 18389 | 3.490876 | 0.000212 | 0.286461 | 0 | 3 | 4 FALSE | BAZ1A    |
| 18395 | 3.18894  | 0.000219 | 0.313584 | 0 | 3 | 4 FALSE | BCL7B    |
| 18407 | 3.18894  | 0.000219 | 0.313584 | 0 | 3 | 4 FALSE | BRK1     |
| 18409 | 3.490876 | 0.000212 | 0.286461 | 0 | 3 | 4 FALSE | BRMS1L   |
| 18415 | 3.490876 | 0.000212 | 0.286461 | 0 | 3 | 4 FALSE | BTN2A2   |
| 18417 | 3.18894  | 0.000219 | 0.313584 | 0 | 3 | 4 FALSE | C12orf4  |
| 18422 | 3.18894  | 0.000219 | 0.313584 | 0 | 3 | 4 FALSE | C17orf51 |
| 18426 | 3.18894  | 0.000219 | 0.313584 | 0 | 3 | 4 FALSE | C1RL     |
| 18428 | 3.18894  | 0.000219 | 0.313584 | 0 | 3 | 4 FALSE | CALU     |
| 18433 | 3.634654 | 0.000323 | 0.275129 | 0 | 3 | 4 FALSE | CARD8    |
| 18450 | 3.18894  | 0.000219 | 0.313584 | 0 | 3 | 4 FALSE | CCNB1    |
| 18474 | 3.56682  | 0.000192 | 0.280362 | 0 | 3 | 4 FALSE | CDS2     |
| 18480 | 3.18894  | 0.000219 | 0.313584 | 0 | 3 | 4 FALSE | CHMP4B   |
| 18482 | 3.634654 | 0.000323 | 0.275129 | 0 | 3 | 4 FALSE | CLASP1   |
| 18486 | 3.18894  | 0.000219 | 0.313584 | 0 | 3 | 4 FALSE | CMC2     |
| 18509 | 3.490876 | 0.000212 | 0.286461 | 0 | 3 | 4 FALSE | CYBRD1   |
| 18518 | 3.18894  | 0.000219 | 0.313584 | 0 | 3 | 4 FALSE | DCUN1D4  |
| 18520 | 3.18894  | 0.000219 | 0.313584 | 0 | 3 | 4 FALSE | DDHD1    |
| 18537 | 3.18894  | 0.000219 | 0.313584 | 0 | 3 | 4 FALSE | DKC1     |
| 18547 | 3.18894  | 0.000219 | 0.313584 | 0 | 3 | 4 FALSE | EDARADD  |
| 18556 | 3.031521 | 0.00043  | 0.329867 | 0 | 3 | 4 FALSE | ELAVL1   |
| 18607 | 3.18894  | 0.000219 | 0.313584 | 0 | 3 | 4 FALSE | GART     |
| 18615 | 3.490876 | 0.000212 | 0.286461 | 0 | 3 | 4 FALSE | GNAI2    |
| 18623 | 3.698433 | 0.000196 | 0.270385 | 0 | 3 | 4 FALSE | GPRIN2   |
| 18649 | 3.18894  | 0.000219 | 0.313584 | 0 | 3 | 4 FALSE | HM13     |
| 18683 | 3.031521 | 0.00043  | 0.329867 | 0 | 3 | 4 FALSE | IFITM1   |
| 18688 | 3.490876 | 0.000212 | 0.286461 | 0 | 3 | 4 FALSE | IGF2BP1  |
| 18692 | 3.18894  | 0.000219 | 0.313584 | 0 | 3 | 4 FALSE | IL1RAP   |
| 18698 | 3.711336 | 0.000156 | 0.269445 | 0 | 3 | 4 FALSE | ING3     |
| 18727 | 3.56682  | 0.000192 | 0.280362 | 0 | 3 | 4 FALSE | KBTBD6   |
| 18746 | 3.18894  | 0.000219 | 0.313584 | 0 | 3 | 4 FALSE | KLHL20   |
| 18748 | 3.18894  | 0.000219 | 0.313584 | 0 | 3 | 4 FALSE | KLHL42   |
| 18757 | 3.644608 | 0.000195 | 0.274378 | 0 | 3 | 4 FALSE | LATS1    |
| 18763 | 3.56682  | 0.000192 | 0.280362 | 0 | 3 | 4 FALSE | LIMD2    |
| 18771 | 3.18894  | 0.000219 | 0.313584 | 0 | 3 | 4 FALSE | LMTK2    |
| 18779 | 3.18894  | 0.000219 | 0.313584 | 0 | 3 | 4 FALSE | LSM4     |
| 18786 | 3.56682  | 0.000192 | 0.280362 | 0 | 3 | 4 FALSE | MAML1    |
| 18792 | 3.18894  | 0.000219 | 0.313584 | 0 | 3 | 4 FALSE | MAPRE3   |

|       |          |          |          |   |   |         |          |
|-------|----------|----------|----------|---|---|---------|----------|
| 18797 | 3.18894  | 0.000219 | 0.313584 | 0 | 3 | 4 FALSE | MDFIC    |
| 18812 | 3.18894  | 0.000219 | 0.313584 | 0 | 3 | 4 FALSE | MID1     |
| 18847 | 3.18894  | 0.000219 | 0.313584 | 0 | 3 | 4 FALSE | NACC2    |
| 18851 | 3.18894  | 0.000219 | 0.313584 | 0 | 3 | 4 FALSE | NCAPG2   |
| 18855 | 3.18894  | 0.000219 | 0.313584 | 0 | 3 | 4 FALSE | NF1      |
| 18859 | 3.56682  | 0.000192 | 0.280362 | 0 | 3 | 4 FALSE | NFE2L1   |
| 18875 | 3.65235  | 0.000206 | 0.273796 | 0 | 3 | 4 FALSE | NSL1     |
| 18881 | 3.18894  | 0.000219 | 0.313584 | 0 | 3 | 4 FALSE | NUPL1    |
| 18896 | 3.18894  | 0.000219 | 0.313584 | 0 | 3 | 4 FALSE | OTUD1    |
| 18907 | 3.698433 | 0.000196 | 0.270385 | 0 | 3 | 4 FALSE | PAPD5    |
| 18910 | 3.18894  | 0.000219 | 0.313584 | 0 | 3 | 4 FALSE | PARD6B   |
| 18917 | 3.18894  | 0.000219 | 0.313584 | 0 | 3 | 4 FALSE | PDS5A    |
| 18935 | 3.634654 | 0.000323 | 0.275129 | 0 | 3 | 4 FALSE | PLEKHG5  |
| 18942 | 3.490876 | 0.000212 | 0.286461 | 0 | 3 | 4 FALSE | POLR2E   |
| 18944 | 3.65235  | 0.000206 | 0.273796 | 0 | 3 | 4 FALSE | POU3F1   |
| 18951 | 3.18894  | 0.000219 | 0.313584 | 0 | 3 | 4 FALSE | PPP2R4   |
| 18966 | 3.18894  | 0.000219 | 0.313584 | 0 | 3 | 4 FALSE | PTAR1    |
| 18974 | 3.18894  | 0.000219 | 0.313584 | 0 | 3 | 4 FALSE | PWP2     |
| 18976 | 3.18894  | 0.000219 | 0.313584 | 0 | 3 | 4 FALSE | RAB18    |
| 19010 | 3.634654 | 0.000323 | 0.275129 | 0 | 3 | 4 FALSE | RHBDD1   |
| 19030 | 3.18894  | 0.000219 | 0.313584 | 0 | 3 | 4 FALSE | RPS3     |
| 19058 | 3.490876 | 0.000212 | 0.286461 | 0 | 3 | 4 FALSE | SF1      |
| 19063 | 3.18894  | 0.000219 | 0.313584 | 0 | 3 | 4 FALSE | SHCBP1   |
| 19088 | 3.18894  | 0.000219 | 0.313584 | 0 | 3 | 4 FALSE | SLFN11   |
| 19110 | 3.56682  | 0.000192 | 0.280362 | 0 | 3 | 4 FALSE | SPEN     |
| 19124 | 3.490876 | 0.000212 | 0.286461 | 0 | 3 | 4 FALSE | STARD7   |
| 19127 | 3.18894  | 0.000219 | 0.313584 | 0 | 3 | 4 FALSE | STAT5B   |
| 19129 | 3.56682  | 0.000192 | 0.280362 | 0 | 3 | 4 FALSE | STC1     |
| 19154 | 3.56682  | 0.000192 | 0.280362 | 0 | 3 | 4 FALSE | TFG      |
| 19170 | 3.490876 | 0.000212 | 0.286461 | 0 | 3 | 4 FALSE | TMEM164  |
| 19196 | 3.65235  | 0.000206 | 0.273796 | 0 | 3 | 4 FALSE | TRAF6    |
| 19278 | 3.18894  | 0.000219 | 0.313584 | 0 | 3 | 4 FALSE | ZNF738   |
| 19284 | 3.18894  | 0.000219 | 0.313584 | 0 | 3 | 4 FALSE | ZNF92    |
| 19335 | 3.587465 | 0.000256 | 0.278748 | 0 | 3 | 4 FALSE | ATXN2L   |
| 19365 | 3.042581 | 0.000395 | 0.328668 | 0 | 3 | 4 FALSE | CAMTA1   |
| 19480 | 3.527373 | 0.000324 | 0.283497 | 0 | 3 | 4 FALSE | FBRS     |
| 19484 | 3.167189 | 0.000363 | 0.315737 | 0 | 3 | 4 FALSE | FBXO28   |
| 19883 | 3.211429 | 0.00035  | 0.311388 | 0 | 3 | 4 FALSE | TRPS1    |
| 19915 | 3.107465 | 0.000361 | 0.321806 | 0 | 3 | 4 FALSE | ZBTB47   |
| 20239 | 3.117419 | 0.00051  | 0.320778 | 0 | 3 | 4 FALSE | C5orf24  |
| 20260 | 3.340092 | 0.000333 | 0.299393 | 0 | 3 | 4 FALSE | CAB39    |
| 20342 | 3.062488 | 0.000489 | 0.326532 | 0 | 3 | 4 FALSE | CDKN1B   |
| 20521 | 3.117419 | 0.00051  | 0.320778 | 0 | 3 | 4 FALSE | DEF8     |
| 20780 | 3.062488 | 0.000489 | 0.326532 | 0 | 3 | 4 FALSE | FICD     |
| 20918 | 3.100461 | 0.000852 | 0.322533 | 0 | 3 | 4 FALSE | HECTD3   |
| 20922 | 3.308756 | 0.000675 | 0.302228 | 0 | 3 | 4 FALSE | HIC1     |
| 21063 | 3.226175 | 0.000422 | 0.309965 | 0 | 3 | 4 FALSE | KIAA0907 |



|       |          |          |          |   |   |         |         |
|-------|----------|----------|----------|---|---|---------|---------|
| 21099 | 3.159447 | 0.000433 | 0.316511 | 0 | 3 | 4 FALSE | KMT2A   |
| 21271 | 3.122949 | 0.000556 | 0.32021  | 0 | 3 | 4 FALSE | MNT     |
| 21290 | 3.23023  | 0.000423 | 0.309575 | 0 | 3 | 4 FALSE | MTF1    |
| 21315 | 3.062488 | 0.000489 | 0.326532 | 0 | 3 | 4 FALSE | MYH9    |
| 21343 | 3.282581 | 0.000492 | 0.304638 | 0 | 3 | 4 FALSE | NCOA3   |
| 21463 | 3.23023  | 0.000423 | 0.309575 | 0 | 3 | 4 FALSE | PCGF2   |
| 21626 | 3.117419 | 0.00051  | 0.320778 | 0 | 3 | 4 FALSE | PRR14L  |
| 21636 | 3.149124 | 0.000594 | 0.317549 | 0 | 3 | 4 FALSE | PRUNE2  |
| 21642 | 3.062488 | 0.000489 | 0.326532 | 0 | 3 | 4 FALSE | PSME3   |
| 21690 | 3.288479 | 0.000499 | 0.304092 | 0 | 3 | 4 FALSE | RACGAP1 |
| 21741 | 3.310599 | 0.00041  | 0.30206  | 0 | 3 | 4 FALSE | REST    |
| 21749 | 3.275945 | 0.000578 | 0.305255 | 0 | 3 | 4 FALSE | RHOB    |
| 21839 | 3.183779 | 0.000496 | 0.314092 | 0 | 3 | 4 FALSE | SCD     |
| 22086 | 3.299539 | 0.000439 | 0.303073 | 0 | 3 | 4 FALSE | TBC1D13 |
| 22186 | 3.190415 | 0.000508 | 0.313439 | 0 | 3 | 4 FALSE | TNPO2   |
| 22205 | 3.062488 | 0.000489 | 0.326532 | 0 | 3 | 4 FALSE | TPRG1L  |
| 22313 | 3.240553 | 0.000322 | 0.308589 | 0 | 3 | 4 FALSE | VPS37B  |
| 22585 | 3.772166 | 0.000186 | 0.2651   | 0 | 3 | 4 FALSE | RDH11   |
| 22619 | 3.772903 | 0.000254 | 0.265048 | 0 | 3 | 4 FALSE | TRPV2   |
| 23050 | 3.536959 | 0.000458 | 0.282729 | 0 | 3 | 4 FALSE | MYL6    |
| 23064 | 3.505622 | 0.000411 | 0.285256 | 0 | 3 | 4 FALSE | NID1    |
| 23201 | 3.505622 | 0.000411 | 0.285256 | 0 | 3 | 4 FALSE | SLC4A2  |
| 23308 | 3.56424  | 0.000318 | 0.280565 | 0 | 3 | 4 FALSE | VAV3    |
| 23432 | 3.792811 | 0.000311 | 0.263657 | 0 | 3 | 4 FALSE | CYP20A1 |
| 23672 | 3.794654 | 0.000312 | 0.263529 | 0 | 3 | 4 FALSE | TRIM59  |
| 24022 | 3.686267 | 0.000267 | 0.271277 | 0 | 3 | 4 FALSE | U2AF2   |
| 11820 | 3.034839 | 0.000153 | 0.329507 | 0 | 2 | 4 FALSE | 11-Sep  |
| 11822 | 3.280737 | 0.000183 | 0.30481  | 0 | 2 | 4 FALSE | 2-Sep   |
| 11824 | 3.034839 | 0.000153 | 0.329507 | 0 | 2 | 4 FALSE | 7-Mar   |
| 11826 | 3.034839 | 0.000153 | 0.329507 | 0 | 2 | 4 FALSE | 7-Sep   |
| 11856 | 3.034839 | 0.000153 | 0.329507 | 0 | 2 | 4 FALSE | ADNP    |
| 11860 | 3.280737 | 0.000183 | 0.30481  | 0 | 2 | 4 FALSE | ADO     |
| 11862 | 3.034839 | 0.000153 | 0.329507 | 0 | 2 | 4 FALSE | ADRB1   |
| 11864 | 3.430415 | 0.000115 | 0.29151  | 0 | 2 | 4 FALSE | AEBP2   |
| 11874 | 3.280737 | 0.000183 | 0.30481  | 0 | 2 | 4 FALSE | AGO4    |
| 11878 | 3.430415 | 0.000115 | 0.29151  | 0 | 2 | 4 FALSE | AK6     |
| 11880 | 3.240184 | 0.000173 | 0.308624 | 0 | 2 | 4 FALSE | AKAP11  |
| 11882 | 3.327189 | 9.97E-05 | 0.300554 | 0 | 2 | 4 FALSE | AKT3    |
| 11884 | 3.32977  | 0.000322 | 0.300321 | 0 | 2 | 4 FALSE | ALG14   |
| 11892 | 3.409032 | 0.000286 | 0.293338 | 0 | 2 | 4 FALSE | ANKDD1A |
| 11894 | 3.280737 | 0.000183 | 0.30481  | 0 | 2 | 4 FALSE | ANKFY1  |
| 11896 | 3.240184 | 0.000173 | 0.308624 | 0 | 2 | 4 FALSE | ANKRD11 |
| 11900 | 3.32977  | 0.000322 | 0.300321 | 0 | 2 | 4 FALSE | ANKRD42 |
| 11904 | 3.034839 | 0.000153 | 0.329507 | 0 | 2 | 4 FALSE | ANLN    |
| 11906 | 3.461382 | 0.00011  | 0.288902 | 0 | 2 | 4 FALSE | ANO6    |
| 11908 | 3.280737 | 0.000183 | 0.30481  | 0 | 2 | 4 FALSE | ANP32E  |
| 11920 | 3.424885 | 0.000206 | 0.291981 | 0 | 2 | 4 FALSE | APLP2   |

|       |          |          |          |   |   |         |          |
|-------|----------|----------|----------|---|---|---------|----------|
| 11924 | 3.034839 | 0.000153 | 0.329507 | 0 | 2 | 4 FALSE | APP      |
| 11928 | 3.034839 | 0.000153 | 0.329507 | 0 | 2 | 4 FALSE | ARAP2    |
| 11932 | 3.034839 | 0.000153 | 0.329507 | 0 | 2 | 4 FALSE | AREL1    |
| 11936 | 3.305438 | 0.000177 | 0.302532 | 0 | 2 | 4 FALSE | ARF6     |
| 11940 | 3.034839 | 0.000153 | 0.329507 | 0 | 2 | 4 FALSE | ARHGAP12 |
| 11944 | 3.240184 | 0.000173 | 0.308624 | 0 | 2 | 4 FALSE | ARHGAP18 |
| 11946 | 3.034839 | 0.000153 | 0.329507 | 0 | 2 | 4 FALSE | ARHGAP5  |
| 11952 | 3.034839 | 0.000153 | 0.329507 | 0 | 2 | 4 FALSE | ARID1A   |
| 11964 | 3.32977  | 0.000322 | 0.300321 | 0 | 2 | 4 FALSE | ARL5A    |
| 11966 | 3.352258 | 0.000159 | 0.298306 | 0 | 2 | 4 FALSE | ARNTL2   |
| 11970 | 3.280737 | 0.000183 | 0.30481  | 0 | 2 | 4 FALSE | ASAP1    |
| 11972 | 3.240184 | 0.000173 | 0.308624 | 0 | 2 | 4 FALSE | ASCC3    |
| 11978 | 3.240184 | 0.000173 | 0.308624 | 0 | 2 | 4 FALSE | ATF7IP   |
| 11986 | 3.305438 | 0.000177 | 0.302532 | 0 | 2 | 4 FALSE | ATM      |
| 11992 | 3.034839 | 0.000153 | 0.329507 | 0 | 2 | 4 FALSE | ATP2B1   |
| 12002 | 3.280737 | 0.000183 | 0.30481  | 0 | 2 | 4 FALSE | ATP6V1A  |
| 12004 | 3.034839 | 0.000153 | 0.329507 | 0 | 2 | 4 FALSE | ATRX     |
| 12006 | 3.034839 | 0.000153 | 0.329507 | 0 | 2 | 4 FALSE | ATXN1    |
| 12010 | 3.240184 | 0.000173 | 0.308624 | 0 | 2 | 4 FALSE | ATXN7L3  |
| 12016 | 3.034839 | 0.000153 | 0.329507 | 0 | 2 | 4 FALSE | B3GALNT2 |
| 12018 | 3.430415 | 0.000115 | 0.29151  | 0 | 2 | 4 FALSE | B4GALT6  |
| 12026 | 3.034839 | 0.000153 | 0.329507 | 0 | 2 | 4 FALSE | BBX      |
| 12030 | 3.034839 | 0.000153 | 0.329507 | 0 | 2 | 4 FALSE | BCL2L11  |
| 12034 | 3.424885 | 0.000206 | 0.291981 | 0 | 2 | 4 FALSE | BCL9L    |
| 12036 | 3.280737 | 0.000183 | 0.30481  | 0 | 2 | 4 FALSE | BCOR     |
| 12038 | 3.305438 | 0.000177 | 0.302532 | 0 | 2 | 4 FALSE | BDP1     |
| 12048 | 3.034839 | 0.000153 | 0.329507 | 0 | 2 | 4 FALSE | BIRC6    |
| 12052 | 3.280737 | 0.000183 | 0.30481  | 0 | 2 | 4 FALSE | BMP2K    |
| 12080 | 3.430415 | 0.000115 | 0.29151  | 0 | 2 | 4 FALSE | C16orf87 |
| 12090 | 3.034839 | 0.000153 | 0.329507 | 0 | 2 | 4 FALSE | C21orf91 |
| 12098 | 3.034839 | 0.000153 | 0.329507 | 0 | 2 | 4 FALSE | C6orf62  |
| 12116 | 3.034839 | 0.000153 | 0.329507 | 0 | 2 | 4 FALSE | CACUL1   |
| 12118 | 3.280737 | 0.000183 | 0.30481  | 0 | 2 | 4 FALSE | CADM1    |
| 12120 | 3.034839 | 0.000153 | 0.329507 | 0 | 2 | 4 FALSE | CALM2    |
| 12124 | 3.034839 | 0.000153 | 0.329507 | 0 | 2 | 4 FALSE | CAMSAP2  |
| 12132 | 3.034839 | 0.000153 | 0.329507 | 0 | 2 | 4 FALSE | CASP3    |
| 12134 | 3.32977  | 0.000322 | 0.300321 | 0 | 2 | 4 FALSE | CBFA2T2  |
| 12138 | 3.280737 | 0.000183 | 0.30481  | 0 | 2 | 4 FALSE | CBX4     |
| 12142 | 3.32977  | 0.000322 | 0.300321 | 0 | 2 | 4 FALSE | CCDC113  |
| 12144 | 3.409032 | 0.000286 | 0.293338 | 0 | 2 | 4 FALSE | CCDC125  |
| 12154 | 3.409032 | 0.000286 | 0.293338 | 0 | 2 | 4 FALSE | CCNF     |
| 12158 | 3.240184 | 0.000173 | 0.308624 | 0 | 2 | 4 FALSE | CCNI     |
| 12168 | 3.409032 | 0.000286 | 0.293338 | 0 | 2 | 4 FALSE | CD180    |
| 12170 | 3.034839 | 0.000153 | 0.329507 | 0 | 2 | 4 FALSE | CD200R1  |
| 12172 | 3.430415 | 0.000115 | 0.29151  | 0 | 2 | 4 FALSE | CD2AP    |
| 12178 | 3.034839 | 0.000153 | 0.329507 | 0 | 2 | 4 FALSE | CD46     |
| 12186 | 3.32129  | 0.000115 | 0.301088 | 0 | 2 | 4 FALSE | CD86     |

|       |          |          |          |   |   |         |          |
|-------|----------|----------|----------|---|---|---------|----------|
| 12188 | 3.280737 | 0.000183 | 0.30481  | 0 | 2 | 4 FALSE | CDC123   |
| 12192 | 3.409032 | 0.000286 | 0.293338 | 0 | 2 | 4 FALSE | CDC42EP4 |
| 12194 | 3.352258 | 0.000159 | 0.298306 | 0 | 2 | 4 FALSE | CDC42SE2 |
| 12196 | 3.240184 | 0.000173 | 0.308624 | 0 | 2 | 4 FALSE | CDC7     |
| 12198 | 3.305438 | 0.000177 | 0.302532 | 0 | 2 | 4 FALSE | CDH2     |
| 12220 | 3.034839 | 0.000153 | 0.329507 | 0 | 2 | 4 FALSE | CEP350   |
| 12224 | 3.352258 | 0.000159 | 0.298306 | 0 | 2 | 4 FALSE | CERS2    |
| 12226 | 3.034839 | 0.000153 | 0.329507 | 0 | 2 | 4 FALSE | CFL2     |
| 12230 | 3.034839 | 0.000153 | 0.329507 | 0 | 2 | 4 FALSE | CGGBP1   |
| 12236 | 3.466175 | 0.000141 | 0.288502 | 0 | 2 | 4 FALSE | CHD7     |
| 12240 | 3.280737 | 0.000183 | 0.30481  | 0 | 2 | 4 FALSE | CHMP3    |
| 12256 | 3.034839 | 0.000153 | 0.329507 | 0 | 2 | 4 FALSE | CLASP2   |
| 12262 | 3.430415 | 0.000115 | 0.29151  | 0 | 2 | 4 FALSE | CLDND1   |
| 12288 | 3.32129  | 0.000115 | 0.301088 | 0 | 2 | 4 FALSE | COPS8    |
| 12290 | 3.034839 | 0.000153 | 0.329507 | 0 | 2 | 4 FALSE | COX10    |
| 12306 | 3.327189 | 9.97E-05 | 0.300554 | 0 | 2 | 4 FALSE | CPSF2    |
| 12308 | 3.327189 | 9.97E-05 | 0.300554 | 0 | 2 | 4 FALSE | CPSF6    |
| 12310 | 3.240184 | 0.000173 | 0.308624 | 0 | 2 | 4 FALSE | CREBZF   |
| 12312 | 3.458433 | 0.000186 | 0.289148 | 0 | 2 | 4 FALSE | CRK      |
| 12318 | 3.034839 | 0.000153 | 0.329507 | 0 | 2 | 4 FALSE | CSNK1A1  |
| 12320 | 3.327189 | 9.97E-05 | 0.300554 | 0 | 2 | 4 FALSE | CSNK1D   |
| 12326 | 3.305438 | 0.000177 | 0.302532 | 0 | 2 | 4 FALSE | CTDSPL2  |
| 12328 | 3.305438 | 0.000177 | 0.302532 | 0 | 2 | 4 FALSE | CTNNB1   |
| 12330 | 3.305438 | 0.000177 | 0.302532 | 0 | 2 | 4 FALSE | CTR9     |
| 12332 | 3.034839 | 0.000153 | 0.329507 | 0 | 2 | 4 FALSE | CUL4B    |
| 12334 | 3.034839 | 0.000153 | 0.329507 | 0 | 2 | 4 FALSE | CUX1     |
| 12340 | 3.034839 | 0.000153 | 0.329507 | 0 | 2 | 4 FALSE | DAG1     |
| 12344 | 3.466175 | 0.000141 | 0.288502 | 0 | 2 | 4 FALSE | DCAF12   |
| 12348 | 3.034839 | 0.000153 | 0.329507 | 0 | 2 | 4 FALSE | DCAF13   |
| 12352 | 3.034839 | 0.000153 | 0.329507 | 0 | 2 | 4 FALSE | DCBLD2   |
| 12358 | 3.280737 | 0.000183 | 0.30481  | 0 | 2 | 4 FALSE | DCTD     |
| 12360 | 3.034839 | 0.000153 | 0.329507 | 0 | 2 | 4 FALSE | DCUN1D1  |
| 12362 | 3.034839 | 0.000153 | 0.329507 | 0 | 2 | 4 FALSE | DCUN1D3  |
| 12368 | 3.034839 | 0.000153 | 0.329507 | 0 | 2 | 4 FALSE | DDX1     |
| 12374 | 3.034839 | 0.000153 | 0.329507 | 0 | 2 | 4 FALSE | DEGS1    |
| 12384 | 3.430415 | 0.000115 | 0.29151  | 0 | 2 | 4 FALSE | DHX15    |
| 12386 | 3.034839 | 0.000153 | 0.329507 | 0 | 2 | 4 FALSE | DHX33    |
| 12402 | 3.034839 | 0.000153 | 0.329507 | 0 | 2 | 4 FALSE | DLG5     |
| 12406 | 3.034839 | 0.000153 | 0.329507 | 0 | 2 | 4 FALSE | DNAJA1   |
| 12412 | 3.034839 | 0.000153 | 0.329507 | 0 | 2 | 4 FALSE | DNAJC7   |
| 12416 | 3.240184 | 0.000173 | 0.308624 | 0 | 2 | 4 FALSE | DNMT3A   |
| 12424 | 3.240184 | 0.000173 | 0.308624 | 0 | 2 | 4 FALSE | DST      |
| 12428 | 3.32129  | 0.000115 | 0.301088 | 0 | 2 | 4 FALSE | DUSP1    |
| 12430 | 3.034839 | 0.000153 | 0.329507 | 0 | 2 | 4 FALSE | DYNC1LI2 |
| 12442 | 3.034839 | 0.000153 | 0.329507 | 0 | 2 | 4 FALSE | EDEM1    |
| 12452 | 3.240184 | 0.000173 | 0.308624 | 0 | 2 | 4 FALSE | EFCAB14  |
| 12464 | 3.034839 | 0.000153 | 0.329507 | 0 | 2 | 4 FALSE | EIF4A2   |

|       |          |          |          |   |   |         |         |
|-------|----------|----------|----------|---|---|---------|---------|
| 12468 | 3.240184 | 0.000173 | 0.308624 | 0 | 2 | 4 FALSE | EIF5    |
| 12474 | 3.240184 | 0.000173 | 0.308624 | 0 | 2 | 4 FALSE | ELK3    |
| 12482 | 3.424885 | 0.000206 | 0.291981 | 0 | 2 | 4 FALSE | EN2     |
| 12490 | 3.034839 | 0.000153 | 0.329507 | 0 | 2 | 4 FALSE | EPC1    |
| 12498 | 3.280737 | 0.000183 | 0.30481  | 0 | 2 | 4 FALSE | ERLIN2  |
| 12500 | 3.430415 | 0.000115 | 0.29151  | 0 | 2 | 4 FALSE | ERO1L   |
| 12504 | 3.430415 | 0.000115 | 0.29151  | 0 | 2 | 4 FALSE | ETF1    |
| 12514 | 3.458433 | 0.000186 | 0.289148 | 0 | 2 | 4 FALSE | EXOC8   |
| 12518 | 3.034839 | 0.000153 | 0.329507 | 0 | 2 | 4 FALSE | EXTL3   |
| 12524 | 3.034839 | 0.000153 | 0.329507 | 0 | 2 | 4 FALSE | EZH2    |
| 12542 | 3.034839 | 0.000153 | 0.329507 | 0 | 2 | 4 FALSE | FAM46A  |
| 12544 | 3.034839 | 0.000153 | 0.329507 | 0 | 2 | 4 FALSE | FAM69A  |
| 12552 | 3.280737 | 0.000183 | 0.30481  | 0 | 2 | 4 FALSE | FAM84B  |
| 12562 | 3.32129  | 0.000115 | 0.301088 | 0 | 2 | 4 FALSE | FANCM   |
| 12564 | 3.034839 | 0.000153 | 0.329507 | 0 | 2 | 4 FALSE | FAR1    |
| 12574 | 3.034839 | 0.000153 | 0.329507 | 0 | 2 | 4 FALSE | FBN2    |
| 12580 | 3.034839 | 0.000153 | 0.329507 | 0 | 2 | 4 FALSE | FBXO11  |
| 12584 | 3.424885 | 0.000206 | 0.291981 | 0 | 2 | 4 FALSE | FBXW11  |
| 12594 | 3.469124 | 0.000166 | 0.288257 | 0 | 2 | 4 FALSE | FHL1    |
| 12608 | 3.409032 | 0.000286 | 0.293338 | 0 | 2 | 4 FALSE | FNIP1   |
| 12610 | 3.32129  | 0.000115 | 0.301088 | 0 | 2 | 4 FALSE | FOS     |
| 12616 | 3.430415 | 0.000115 | 0.29151  | 0 | 2 | 4 FALSE | FOXK2   |
| 12622 | 3.034839 | 0.000153 | 0.329507 | 0 | 2 | 4 FALSE | FRS2    |
| 12624 | 3.32977  | 0.000322 | 0.300321 | 0 | 2 | 4 FALSE | FUT11   |
| 12626 | 3.424885 | 0.000206 | 0.291981 | 0 | 2 | 4 FALSE | FXR2    |
| 12628 | 3.034839 | 0.000153 | 0.329507 | 0 | 2 | 4 FALSE | FYN     |
| 12632 | 3.352258 | 0.000159 | 0.298306 | 0 | 2 | 4 FALSE | FZR1    |
| 12636 | 3.034839 | 0.000153 | 0.329507 | 0 | 2 | 4 FALSE | G3BP2   |
| 12646 | 3.280737 | 0.000183 | 0.30481  | 0 | 2 | 4 FALSE | GCC1    |
| 12648 | 3.034839 | 0.000153 | 0.329507 | 0 | 2 | 4 FALSE | GCLC    |
| 12652 | 3.352258 | 0.000159 | 0.298306 | 0 | 2 | 4 FALSE | GCN1L1  |
| 12658 | 3.424885 | 0.000206 | 0.291981 | 0 | 2 | 4 FALSE | GFPT2   |
| 12668 | 3.034839 | 0.000153 | 0.329507 | 0 | 2 | 4 FALSE | GMEB2   |
| 12670 | 3.305438 | 0.000177 | 0.302532 | 0 | 2 | 4 FALSE | GMPS    |
| 12672 | 3.034839 | 0.000153 | 0.329507 | 0 | 2 | 4 FALSE | GNA13   |
| 12674 | 3.430415 | 0.000115 | 0.29151  | 0 | 2 | 4 FALSE | GNAI1   |
| 12690 | 3.327189 | 9.97E-05 | 0.300554 | 0 | 2 | 4 FALSE | GOLGA7  |
| 12694 | 3.327189 | 9.97E-05 | 0.300554 | 0 | 2 | 4 FALSE | GORASP2 |
| 12696 | 3.034839 | 0.000153 | 0.329507 | 0 | 2 | 4 FALSE | GPAM    |
| 12700 | 3.034839 | 0.000153 | 0.329507 | 0 | 2 | 4 FALSE | GPCPD1  |
| 12702 | 3.034839 | 0.000153 | 0.329507 | 0 | 2 | 4 FALSE | GPD2    |
| 12710 | 3.240184 | 0.000173 | 0.308624 | 0 | 2 | 4 FALSE | GPRC5A  |
| 12712 | 3.32977  | 0.000322 | 0.300321 | 0 | 2 | 4 FALSE | GRAMD1B |
| 12716 | 3.034839 | 0.000153 | 0.329507 | 0 | 2 | 4 FALSE | GRIK3   |
| 12720 | 3.034839 | 0.000153 | 0.329507 | 0 | 2 | 4 FALSE | GRSF1   |
| 12722 | 3.034839 | 0.000153 | 0.329507 | 0 | 2 | 4 FALSE | GSE1    |
| 12726 | 3.034839 | 0.000153 | 0.329507 | 0 | 2 | 4 FALSE | GTF2A1  |

|       |          |          |          |   |   |         |           |
|-------|----------|----------|----------|---|---|---------|-----------|
| 12730 | 3.32977  | 0.000322 | 0.300321 | 0 | 2 | 4 FALSE | GTF2E2    |
| 12744 | 3.305438 | 0.000177 | 0.302532 | 0 | 2 | 4 FALSE | HDAC2     |
| 12756 | 3.430415 | 0.000115 | 0.29151  | 0 | 2 | 4 FALSE | HELLS     |
| 12764 | 3.327189 | 9.97E-05 | 0.300554 | 0 | 2 | 4 FALSE | HIAT1     |
| 12766 | 3.305438 | 0.000177 | 0.302532 | 0 | 2 | 4 FALSE | HIATL1    |
| 12774 | 3.466175 | 0.000141 | 0.288502 | 0 | 2 | 4 FALSE | HIST1H4C  |
| 12778 | 3.461382 | 0.00011  | 0.288902 | 0 | 2 | 4 FALSE | HIVEP3    |
| 12782 | 3.240184 | 0.000173 | 0.308624 | 0 | 2 | 4 FALSE | HMGXB4    |
| 12786 | 3.430415 | 0.000115 | 0.29151  | 0 | 2 | 4 FALSE | HNRNPAO   |
| 12796 | 3.458433 | 0.000186 | 0.289148 | 0 | 2 | 4 FALSE | HNRNPH2   |
| 12802 | 3.352258 | 0.000159 | 0.298306 | 0 | 2 | 4 FALSE | HOXA10    |
| 12804 | 3.305438 | 0.000177 | 0.302532 | 0 | 2 | 4 FALSE | HOXA9     |
| 12808 | 3.034839 | 0.000153 | 0.329507 | 0 | 2 | 4 FALSE | HPRT1     |
| 12810 | 3.240184 | 0.000173 | 0.308624 | 0 | 2 | 4 FALSE | HSDL1     |
| 12812 | 3.352258 | 0.000159 | 0.298306 | 0 | 2 | 4 FALSE | HSP90AA1  |
| 12814 | 3.305438 | 0.000177 | 0.302532 | 0 | 2 | 4 FALSE | HSP90AB1  |
| 12818 | 3.352258 | 0.000159 | 0.298306 | 0 | 2 | 4 FALSE | HSPA13    |
| 12836 | 3.240184 | 0.000173 | 0.308624 | 0 | 2 | 4 FALSE | IER3      |
| 12842 | 3.32129  | 0.000115 | 0.301088 | 0 | 2 | 4 FALSE | IFITM3    |
| 12858 | 3.034839 | 0.000153 | 0.329507 | 0 | 2 | 4 FALSE | INA       |
| 12874 | 3.305438 | 0.000177 | 0.302532 | 0 | 2 | 4 FALSE | ITGA3     |
| 12884 | 3.034839 | 0.000153 | 0.329507 | 0 | 2 | 4 FALSE | JAZF1     |
| 12896 | 3.034839 | 0.000153 | 0.329507 | 0 | 2 | 4 FALSE | KBTBD2    |
| 12900 | 3.034839 | 0.000153 | 0.329507 | 0 | 2 | 4 FALSE | KCNQ5     |
| 12904 | 3.430415 | 0.000115 | 0.29151  | 0 | 2 | 4 FALSE | KCTD2     |
| 12914 | 3.352258 | 0.000159 | 0.298306 | 0 | 2 | 4 FALSE | KIAA0319L |
| 12922 | 3.034839 | 0.000153 | 0.329507 | 0 | 2 | 4 FALSE | KIAA1598  |
| 12924 | 3.034839 | 0.000153 | 0.329507 | 0 | 2 | 4 FALSE | KIAA2026  |
| 12926 | 3.034839 | 0.000153 | 0.329507 | 0 | 2 | 4 FALSE | KIF13A    |
| 12928 | 3.327189 | 9.97E-05 | 0.300554 | 0 | 2 | 4 FALSE | KIF1B     |
| 12936 | 3.305438 | 0.000177 | 0.302532 | 0 | 2 | 4 FALSE | KLC1      |
| 12940 | 3.034839 | 0.000153 | 0.329507 | 0 | 2 | 4 FALSE | KLF12     |
| 12942 | 3.034839 | 0.000153 | 0.329507 | 0 | 2 | 4 FALSE | KLF3      |
| 12944 | 3.034839 | 0.000153 | 0.329507 | 0 | 2 | 4 FALSE | KLF6      |
| 12950 | 3.327189 | 9.97E-05 | 0.300554 | 0 | 2 | 4 FALSE | KMT2E     |
| 12960 | 3.469124 | 0.000166 | 0.288257 | 0 | 2 | 4 FALSE | L2HGDH    |
| 12962 | 3.32977  | 0.000322 | 0.300321 | 0 | 2 | 4 FALSE | LANCL3    |
| 12984 | 3.280737 | 0.000183 | 0.30481  | 0 | 2 | 4 FALSE | LIN7C     |
| 12998 | 3.034839 | 0.000153 | 0.329507 | 0 | 2 | 4 FALSE | LPGAT1    |
| 13000 | 3.034839 | 0.000153 | 0.329507 | 0 | 2 | 4 FALSE | LPHN2     |
| 13004 | 3.32977  | 0.000322 | 0.300321 | 0 | 2 | 4 FALSE | LRIF1     |
| 13014 | 3.034839 | 0.000153 | 0.329507 | 0 | 2 | 4 FALSE | LTN1      |
| 13024 | 3.280737 | 0.000183 | 0.30481  | 0 | 2 | 4 FALSE | MAFK      |
| 13028 | 3.240184 | 0.000173 | 0.308624 | 0 | 2 | 4 FALSE | MAGT1     |
| 13032 | 3.32977  | 0.000322 | 0.300321 | 0 | 2 | 4 FALSE | MAML3     |
| 13038 | 3.352258 | 0.000159 | 0.298306 | 0 | 2 | 4 FALSE | MAP2K1    |
| 13042 | 3.034839 | 0.000153 | 0.329507 | 0 | 2 | 4 FALSE | MAP3K2    |

|       |          |          |          |   |   |         |          |
|-------|----------|----------|----------|---|---|---------|----------|
| 13048 | 3.034839 | 0.000153 | 0.329507 | 0 | 2 | 4 FALSE | MAP3K9   |
| 13056 | 3.034839 | 0.000153 | 0.329507 | 0 | 2 | 4 FALSE | MAPK1IP1 |
| 13058 | 3.280737 | 0.000183 | 0.30481  | 0 | 2 | 4 FALSE | MAPK6    |
| 13060 | 3.352258 | 0.000159 | 0.298306 | 0 | 2 | 4 FALSE | MARCKSL1 |
| 13068 | 3.240184 | 0.000173 | 0.308624 | 0 | 2 | 4 FALSE | MATR3    |
| 13070 | 3.034839 | 0.000153 | 0.329507 | 0 | 2 | 4 FALSE | MAVS     |
| 13078 | 3.034839 | 0.000153 | 0.329507 | 0 | 2 | 4 FALSE | MBNL1    |
| 13080 | 3.034839 | 0.000153 | 0.329507 | 0 | 2 | 4 FALSE | MBNL2    |
| 13084 | 3.034839 | 0.000153 | 0.329507 | 0 | 2 | 4 FALSE | MCC      |
| 13088 | 3.280737 | 0.000183 | 0.30481  | 0 | 2 | 4 FALSE | MCTS1    |
| 13094 | 3.32977  | 0.000322 | 0.300321 | 0 | 2 | 4 FALSE | MED17    |
| 13098 | 3.034839 | 0.000153 | 0.329507 | 0 | 2 | 4 FALSE | MEF2A    |
| 13108 | 3.352258 | 0.000159 | 0.298306 | 0 | 2 | 4 FALSE | MET      |
| 13110 | 3.409032 | 0.000286 | 0.293338 | 0 | 2 | 4 FALSE | METTL14  |
| 13114 | 3.034839 | 0.000153 | 0.329507 | 0 | 2 | 4 FALSE | MEX3B    |
| 13118 | 3.034839 | 0.000153 | 0.329507 | 0 | 2 | 4 FALSE | MFF      |
| 13122 | 3.240184 | 0.000173 | 0.308624 | 0 | 2 | 4 FALSE | MGARP    |
| 13124 | 3.034839 | 0.000153 | 0.329507 | 0 | 2 | 4 FALSE | MGAT4A   |
| 13132 | 3.240184 | 0.000173 | 0.308624 | 0 | 2 | 4 FALSE | MITF     |
| 13136 | 3.034839 | 0.000153 | 0.329507 | 0 | 2 | 4 FALSE | MKL2     |
| 13142 | 3.034839 | 0.000153 | 0.329507 | 0 | 2 | 4 FALSE | MLEC     |
| 13144 | 3.034839 | 0.000153 | 0.329507 | 0 | 2 | 4 FALSE | MLK4     |
| 13150 | 3.32977  | 0.000322 | 0.300321 | 0 | 2 | 4 FALSE | MMS22L   |
| 13162 | 3.430415 | 0.000115 | 0.29151  | 0 | 2 | 4 FALSE | MORC3    |
| 13164 | 3.466175 | 0.000141 | 0.288502 | 0 | 2 | 4 FALSE | MPHOSPH  |
| 13170 | 3.034839 | 0.000153 | 0.329507 | 0 | 2 | 4 FALSE | MPRIP    |
| 13172 | 3.466175 | 0.000141 | 0.288502 | 0 | 2 | 4 FALSE | MRFAP1   |
| 13190 | 3.305438 | 0.000177 | 0.302532 | 0 | 2 | 4 FALSE | MSN      |
| 13192 | 3.034839 | 0.000153 | 0.329507 | 0 | 2 | 4 FALSE | MTF2     |
| 13196 | 3.034839 | 0.000153 | 0.329507 | 0 | 2 | 4 FALSE | MTMR4    |
| 13198 | 3.034839 | 0.000153 | 0.329507 | 0 | 2 | 4 FALSE | MTMR6    |
| 13212 | 3.461382 | 0.00011  | 0.288902 | 0 | 2 | 4 FALSE | MYO1B    |
| 13214 | 3.305438 | 0.000177 | 0.302532 | 0 | 2 | 4 FALSE | MYO5A    |
| 13218 | 3.352258 | 0.000159 | 0.298306 | 0 | 2 | 4 FALSE | MYPOP    |
| 13220 | 3.430415 | 0.000115 | 0.29151  | 0 | 2 | 4 FALSE | N4BP1    |
| 13224 | 3.305438 | 0.000177 | 0.302532 | 0 | 2 | 4 FALSE | NAA30    |
| 13226 | 3.280737 | 0.000183 | 0.30481  | 0 | 2 | 4 FALSE | NACA     |
| 13246 | 3.409032 | 0.000286 | 0.293338 | 0 | 2 | 4 FALSE | NDEL1    |
| 13264 | 3.034839 | 0.000153 | 0.329507 | 0 | 2 | 4 FALSE | NFIB     |
| 13266 | 3.280737 | 0.000183 | 0.30481  | 0 | 2 | 4 FALSE | NHLRC2   |
| 13270 | 3.352258 | 0.000159 | 0.298306 | 0 | 2 | 4 FALSE | NISCH    |
| 13282 | 3.32129  | 0.000115 | 0.301088 | 0 | 2 | 4 FALSE | NMI      |
| 13296 | 3.32977  | 0.000322 | 0.300321 | 0 | 2 | 4 FALSE | NR2F6    |
| 13298 | 3.482028 | 0.000101 | 0.287189 | 0 | 2 | 4 FALSE | NR3C1    |
| 13304 | 3.305438 | 0.000177 | 0.302532 | 0 | 2 | 4 FALSE | NRP1     |
| 13324 | 3.034839 | 0.000153 | 0.329507 | 0 | 2 | 4 FALSE | NUS1     |
| 13336 | 3.409032 | 0.000286 | 0.293338 | 0 | 2 | 4 FALSE | OSMR     |

|       |          |          |          |   |   |         |          |
|-------|----------|----------|----------|---|---|---------|----------|
| 13354 | 3.32977  | 0.000322 | 0.300321 | 0 | 2 | 4 FALSE | PAK2     |
| 13370 | 3.352258 | 0.000159 | 0.298306 | 0 | 2 | 4 FALSE | PARVA    |
| 13376 | 3.034839 | 0.000153 | 0.329507 | 0 | 2 | 4 FALSE | PCDH10   |
| 13378 | 3.034839 | 0.000153 | 0.329507 | 0 | 2 | 4 FALSE | PCDH7    |
| 13382 | 3.034839 | 0.000153 | 0.329507 | 0 | 2 | 4 FALSE | PCGF5    |
| 13388 | 3.034839 | 0.000153 | 0.329507 | 0 | 2 | 4 FALSE | PDCD10   |
| 13396 | 3.430415 | 0.000115 | 0.29151  | 0 | 2 | 4 FALSE | PDK1     |
| 13398 | 3.034839 | 0.000153 | 0.329507 | 0 | 2 | 4 FALSE | PDLIM5   |
| 13400 | 3.034839 | 0.000153 | 0.329507 | 0 | 2 | 4 FALSE | PDXDC1   |
| 13418 | 3.305438 | 0.000177 | 0.302532 | 0 | 2 | 4 FALSE | PHACTR2  |
| 13420 | 3.034839 | 0.000153 | 0.329507 | 0 | 2 | 4 FALSE | PHF13    |
| 13422 | 3.034839 | 0.000153 | 0.329507 | 0 | 2 | 4 FALSE | PHF20    |
| 13426 | 3.034839 | 0.000153 | 0.329507 | 0 | 2 | 4 FALSE | PHIP     |
| 13434 | 3.034839 | 0.000153 | 0.329507 | 0 | 2 | 4 FALSE | PIK3CB   |
| 13436 | 3.409032 | 0.000286 | 0.293338 | 0 | 2 | 4 FALSE | PIK3CD   |
| 13438 | 3.034839 | 0.000153 | 0.329507 | 0 | 2 | 4 FALSE | PIKFYVE  |
| 13464 | 3.32977  | 0.000322 | 0.300321 | 0 | 2 | 4 FALSE | PLEKHA3  |
| 13470 | 3.240184 | 0.000173 | 0.308624 | 0 | 2 | 4 FALSE | PMP22    |
| 13490 | 3.482028 | 0.000101 | 0.287189 | 0 | 2 | 4 FALSE | PPARGC1B |
| 13492 | 3.034839 | 0.000153 | 0.329507 | 0 | 2 | 4 FALSE | PPM1A    |
| 13498 | 3.352258 | 0.000159 | 0.298306 | 0 | 2 | 4 FALSE | PPP1CC   |
| 13508 | 3.034839 | 0.000153 | 0.329507 | 0 | 2 | 4 FALSE | PPP2R5A  |
| 13514 | 3.32977  | 0.000322 | 0.300321 | 0 | 2 | 4 FALSE | PPP3CB   |
| 13522 | 3.034839 | 0.000153 | 0.329507 | 0 | 2 | 4 FALSE | PPTC7    |
| 13524 | 3.034839 | 0.000153 | 0.329507 | 0 | 2 | 4 FALSE | PRC1     |
| 13526 | 3.305438 | 0.000177 | 0.302532 | 0 | 2 | 4 FALSE | PRDM1    |
| 13536 | 3.034839 | 0.000153 | 0.329507 | 0 | 2 | 4 FALSE | PRICKLE2 |
| 13538 | 3.32977  | 0.000322 | 0.300321 | 0 | 2 | 4 FALSE | PRIM1    |
| 13546 | 3.034839 | 0.000153 | 0.329507 | 0 | 2 | 4 FALSE | PRLR     |
| 13562 | 3.280737 | 0.000183 | 0.30481  | 0 | 2 | 4 FALSE | PSMB2    |
| 13568 | 3.240184 | 0.000173 | 0.308624 | 0 | 2 | 4 FALSE | PSPC1    |
| 13582 | 3.424885 | 0.000206 | 0.291981 | 0 | 2 | 4 FALSE | PTPN14   |
| 13592 | 3.034839 | 0.000153 | 0.329507 | 0 | 2 | 4 FALSE | PTX3     |
| 13596 | 3.034839 | 0.000153 | 0.329507 | 0 | 2 | 4 FALSE | PUM2     |
| 13618 | 3.034839 | 0.000153 | 0.329507 | 0 | 2 | 4 FALSE | RAB1A    |
| 13620 | 3.034839 | 0.000153 | 0.329507 | 0 | 2 | 4 FALSE | RAB21    |
| 13626 | 3.32977  | 0.000322 | 0.300321 | 0 | 2 | 4 FALSE | RAB3D    |
| 13630 | 3.034839 | 0.000153 | 0.329507 | 0 | 2 | 4 FALSE | RAB8B    |
| 13636 | 3.034839 | 0.000153 | 0.329507 | 0 | 2 | 4 FALSE | RAI1     |
| 13650 | 3.034839 | 0.000153 | 0.329507 | 0 | 2 | 4 FALSE | RAP2C    |
| 13652 | 3.034839 | 0.000153 | 0.329507 | 0 | 2 | 4 FALSE | RAPGEF6  |
| 13662 | 3.32977  | 0.000322 | 0.300321 | 0 | 2 | 4 FALSE | RASSF9   |
| 13668 | 3.32977  | 0.000322 | 0.300321 | 0 | 2 | 4 FALSE | RBM12B   |
| 13670 | 3.32977  | 0.000322 | 0.300321 | 0 | 2 | 4 FALSE | RBM22    |
| 13672 | 3.034839 | 0.000153 | 0.329507 | 0 | 2 | 4 FALSE | RBM25    |
| 13674 | 3.240184 | 0.000173 | 0.308624 | 0 | 2 | 4 FALSE | RBM27    |
| 13682 | 3.280737 | 0.000183 | 0.30481  | 0 | 2 | 4 FALSE | REEP5    |

|       |          |          |          |   |   |         |          |
|-------|----------|----------|----------|---|---|---------|----------|
| 13686 | 3.32977  | 0.000322 | 0.300321 | 0 | 2 | 4 FALSE | REPIN1   |
| 13692 | 3.352258 | 0.000159 | 0.298306 | 0 | 2 | 4 FALSE | RFX3     |
| 13718 | 3.034839 | 0.000153 | 0.329507 | 0 | 2 | 4 FALSE | RNF111   |
| 13722 | 3.034839 | 0.000153 | 0.329507 | 0 | 2 | 4 FALSE | RNF139   |
| 13728 | 3.240184 | 0.000173 | 0.308624 | 0 | 2 | 4 FALSE | RNF213   |
| 13730 | 3.034839 | 0.000153 | 0.329507 | 0 | 2 | 4 FALSE | RNF216   |
| 13742 | 3.034839 | 0.000153 | 0.329507 | 0 | 2 | 4 FALSE | RPL15    |
| 13746 | 3.280737 | 0.000183 | 0.30481  | 0 | 2 | 4 FALSE | RPL3     |
| 13748 | 3.32977  | 0.000322 | 0.300321 | 0 | 2 | 4 FALSE | RPL7L1   |
| 13756 | 3.034839 | 0.000153 | 0.329507 | 0 | 2 | 4 FALSE | RPS23    |
| 13758 | 3.305438 | 0.000177 | 0.302532 | 0 | 2 | 4 FALSE | RPS6KA3  |
| 13760 | 3.034839 | 0.000153 | 0.329507 | 0 | 2 | 4 FALSE | RPS6KA5  |
| 13764 | 3.034839 | 0.000153 | 0.329507 | 0 | 2 | 4 FALSE | RRM1     |
| 13768 | 3.430415 | 0.000115 | 0.29151  | 0 | 2 | 4 FALSE | RRN3     |
| 13774 | 3.280737 | 0.000183 | 0.30481  | 0 | 2 | 4 FALSE | SACM1L   |
| 13776 | 3.280737 | 0.000183 | 0.30481  | 0 | 2 | 4 FALSE | SACS     |
| 13794 | 3.424885 | 0.000206 | 0.291981 | 0 | 2 | 4 FALSE | SCOC     |
| 13798 | 3.034839 | 0.000153 | 0.329507 | 0 | 2 | 4 FALSE | SDC2     |
| 13800 | 3.034839 | 0.000153 | 0.329507 | 0 | 2 | 4 FALSE | SDE2     |
| 13810 | 3.034839 | 0.000153 | 0.329507 | 0 | 2 | 4 FALSE | SEL1L    |
| 13816 | 3.034839 | 0.000153 | 0.329507 | 0 | 2 | 4 FALSE | SERINC1  |
| 13824 | 3.280737 | 0.000183 | 0.30481  | 0 | 2 | 4 FALSE | SETD7    |
| 13826 | 3.280737 | 0.000183 | 0.30481  | 0 | 2 | 4 FALSE | SETX     |
| 13832 | 3.240184 | 0.000173 | 0.308624 | 0 | 2 | 4 FALSE | SFXN1    |
| 13836 | 3.240184 | 0.000173 | 0.308624 | 0 | 2 | 4 FALSE | SGPL1    |
| 13842 | 3.352258 | 0.000159 | 0.298306 | 0 | 2 | 4 FALSE | SHMT1    |
| 13844 | 3.32129  | 0.000115 | 0.301088 | 0 | 2 | 4 FALSE | SIKE1    |
| 13848 | 3.034839 | 0.000153 | 0.329507 | 0 | 2 | 4 FALSE | SKIL     |
| 13856 | 3.32977  | 0.000322 | 0.300321 | 0 | 2 | 4 FALSE | SLC11A2  |
| 13860 | 3.327189 | 9.97E-05 | 0.300554 | 0 | 2 | 4 FALSE | SLC19A2  |
| 13886 | 3.240184 | 0.000173 | 0.308624 | 0 | 2 | 4 FALSE | SLC39A10 |
| 13900 | 3.034839 | 0.000153 | 0.329507 | 0 | 2 | 4 FALSE | SLC9A1   |
| 13904 | 3.034839 | 0.000153 | 0.329507 | 0 | 2 | 4 FALSE | SLTM     |
| 13918 | 3.461382 | 0.00011  | 0.288902 | 0 | 2 | 4 FALSE | SMC4     |
| 13920 | 3.461382 | 0.00011  | 0.288902 | 0 | 2 | 4 FALSE | SMCO4    |
| 13924 | 3.430415 | 0.000115 | 0.29151  | 0 | 2 | 4 FALSE | SMIM15   |
| 13928 | 3.32977  | 0.000322 | 0.300321 | 0 | 2 | 4 FALSE | SMU1     |
| 13940 | 3.034839 | 0.000153 | 0.329507 | 0 | 2 | 4 FALSE | SNX27    |
| 13946 | 3.280737 | 0.000183 | 0.30481  | 0 | 2 | 4 FALSE | SOGA3    |
| 13950 | 3.305438 | 0.000177 | 0.302532 | 0 | 2 | 4 FALSE | SOX9     |
| 13952 | 3.305438 | 0.000177 | 0.302532 | 0 | 2 | 4 FALSE | SP1      |
| 13960 | 3.034839 | 0.000153 | 0.329507 | 0 | 2 | 4 FALSE | SPATA2   |
| 13996 | 3.280737 | 0.000183 | 0.30481  | 0 | 2 | 4 FALSE | STAG2    |
| 14000 | 3.034839 | 0.000153 | 0.329507 | 0 | 2 | 4 FALSE | STARD3NL |
| 14006 | 3.352258 | 0.000159 | 0.298306 | 0 | 2 | 4 FALSE | STC2     |
| 14008 | 3.034839 | 0.000153 | 0.329507 | 0 | 2 | 4 FALSE | STMN1    |
| 14010 | 3.32129  | 0.000115 | 0.301088 | 0 | 2 | 4 FALSE | STON2    |



|       |          |          |          |   |   |         |          |
|-------|----------|----------|----------|---|---|---------|----------|
| 14012 | 3.034839 | 0.000153 | 0.329507 | 0 | 2 | 4 FALSE | STRN3    |
| 14018 | 3.034839 | 0.000153 | 0.329507 | 0 | 2 | 4 FALSE | STYX     |
| 14020 | 3.466175 | 0.000141 | 0.288502 | 0 | 2 | 4 FALSE | SUB1     |
| 14028 | 3.034839 | 0.000153 | 0.329507 | 0 | 2 | 4 FALSE | SUZ12    |
| 14030 | 3.034839 | 0.000153 | 0.329507 | 0 | 2 | 4 FALSE | SYNCRIP  |
| 14034 | 3.034839 | 0.000153 | 0.329507 | 0 | 2 | 4 FALSE | SYPL1    |
| 14036 | 3.280737 | 0.000183 | 0.30481  | 0 | 2 | 4 FALSE | SZRD1    |
| 14038 | 3.352258 | 0.000159 | 0.298306 | 0 | 2 | 4 FALSE | TADA2B   |
| 14040 | 3.32977  | 0.000322 | 0.300321 | 0 | 2 | 4 FALSE | TAF13    |
| 14042 | 3.034839 | 0.000153 | 0.329507 | 0 | 2 | 4 FALSE | TAF3     |
| 14044 | 3.034839 | 0.000153 | 0.329507 | 0 | 2 | 4 FALSE | TANC2    |
| 14058 | 3.034839 | 0.000153 | 0.329507 | 0 | 2 | 4 FALSE | TBPL1    |
| 14062 | 3.32977  | 0.000322 | 0.300321 | 0 | 2 | 4 FALSE | TBX20    |
| 14074 | 3.240184 | 0.000173 | 0.308624 | 0 | 2 | 4 FALSE | TET2     |
| 14078 | 3.240184 | 0.000173 | 0.308624 | 0 | 2 | 4 FALSE | TFAP4    |
| 14084 | 3.469124 | 0.000166 | 0.288257 | 0 | 2 | 4 FALSE | TGFBR1   |
| 14088 | 3.458433 | 0.000186 | 0.289148 | 0 | 2 | 4 FALSE | TGFBR3   |
| 14100 | 3.430415 | 0.000115 | 0.29151  | 0 | 2 | 4 FALSE | THR3     |
| 14116 | 3.240184 | 0.000173 | 0.308624 | 0 | 2 | 4 FALSE | TMED5    |
| 14136 | 3.240184 | 0.000173 | 0.308624 | 0 | 2 | 4 FALSE | TMEM19   |
| 14138 | 3.430415 | 0.000115 | 0.29151  | 0 | 2 | 4 FALSE | TMEM192  |
| 14140 | 3.280737 | 0.000183 | 0.30481  | 0 | 2 | 4 FALSE | TMEM201  |
| 14142 | 3.034839 | 0.000153 | 0.329507 | 0 | 2 | 4 FALSE | TMEM30A  |
| 14148 | 3.034839 | 0.000153 | 0.329507 | 0 | 2 | 4 FALSE | TMEM64   |
| 14150 | 3.32977  | 0.000322 | 0.300321 | 0 | 2 | 4 FALSE | TMEM65   |
| 14152 | 3.034839 | 0.000153 | 0.329507 | 0 | 2 | 4 FALSE | TMEM87A  |
| 14156 | 3.034839 | 0.000153 | 0.329507 | 0 | 2 | 4 FALSE | TMTC3    |
| 14158 | 3.424885 | 0.000206 | 0.291981 | 0 | 2 | 4 FALSE | TNFAIP1  |
| 14160 | 3.424885 | 0.000206 | 0.291981 | 0 | 2 | 4 FALSE | TNFRSF21 |
| 14168 | 3.352258 | 0.000159 | 0.298306 | 0 | 2 | 4 FALSE | TNRC18P2 |
| 14174 | 3.034839 | 0.000153 | 0.329507 | 0 | 2 | 4 FALSE | TNRC6C   |
| 14182 | 3.034839 | 0.000153 | 0.329507 | 0 | 2 | 4 FALSE | TOP2B    |
| 14184 | 3.034839 | 0.000153 | 0.329507 | 0 | 2 | 4 FALSE | TOR1AIP1 |
| 14186 | 3.034839 | 0.000153 | 0.329507 | 0 | 2 | 4 FALSE | TOR1AIP2 |
| 14190 | 3.280737 | 0.000183 | 0.30481  | 0 | 2 | 4 FALSE | TPI1     |
| 14200 | 3.034839 | 0.000153 | 0.329507 | 0 | 2 | 4 FALSE | TRIM37   |
| 14204 | 3.305438 | 0.000177 | 0.302532 | 0 | 2 | 4 FALSE | TRIO     |
| 14206 | 3.034839 | 0.000153 | 0.329507 | 0 | 2 | 4 FALSE | TRIP12   |
| 14210 | 3.034839 | 0.000153 | 0.329507 | 0 | 2 | 4 FALSE | TROVE2   |
| 14218 | 3.034839 | 0.000153 | 0.329507 | 0 | 2 | 4 FALSE | TSPAN12  |
| 14220 | 3.305438 | 0.000177 | 0.302532 | 0 | 2 | 4 FALSE | TSPAN13  |
| 14234 | 3.240184 | 0.000173 | 0.308624 | 0 | 2 | 4 FALSE | TUBA1C   |
| 14238 | 3.034839 | 0.000153 | 0.329507 | 0 | 2 | 4 FALSE | TUSC2    |
| 14256 | 3.034839 | 0.000153 | 0.329507 | 0 | 2 | 4 FALSE | UBE2D2   |
| 14258 | 3.034839 | 0.000153 | 0.329507 | 0 | 2 | 4 FALSE | UBE2D3   |
| 14260 | 3.430415 | 0.000115 | 0.29151  | 0 | 2 | 4 FALSE | UBE2E2   |
| 14276 | 3.034839 | 0.000153 | 0.329507 | 0 | 2 | 4 FALSE | UBQLN1   |

|       |          |          |          |   |   |         |           |
|-------|----------|----------|----------|---|---|---------|-----------|
| 14282 | 3.280737 | 0.000183 | 0.30481  | 0 | 2 | 4 FALSE | UBXN1     |
| 14302 | 3.469124 | 0.000166 | 0.288257 | 0 | 2 | 4 FALSE | USP3      |
| 14304 | 3.034839 | 0.000153 | 0.329507 | 0 | 2 | 4 FALSE | USP34     |
| 14306 | 3.424885 | 0.000206 | 0.291981 | 0 | 2 | 4 FALSE | USP36     |
| 14310 | 3.280737 | 0.000183 | 0.30481  | 0 | 2 | 4 FALSE | USP46     |
| 14316 | 3.430415 | 0.000115 | 0.29151  | 0 | 2 | 4 FALSE | USP9X     |
| 14318 | 3.034839 | 0.000153 | 0.329507 | 0 | 2 | 4 FALSE | VAMP3     |
| 14322 | 3.034839 | 0.000153 | 0.329507 | 0 | 2 | 4 FALSE | VAPA      |
| 14326 | 3.305438 | 0.000177 | 0.302532 | 0 | 2 | 4 FALSE | VCAN      |
| 14328 | 3.352258 | 0.000159 | 0.298306 | 0 | 2 | 4 FALSE | VCL       |
| 14332 | 3.32977  | 0.000322 | 0.300321 | 0 | 2 | 4 FALSE | VEGFC     |
| 14340 | 3.034839 | 0.000153 | 0.329507 | 0 | 2 | 4 FALSE | WAC       |
| 14348 | 3.240184 | 0.000173 | 0.308624 | 0 | 2 | 4 FALSE | WEE1      |
| 14364 | 3.466175 | 0.000141 | 0.288502 | 0 | 2 | 4 FALSE | YAE1D1    |
| 14370 | 3.240184 | 0.000173 | 0.308624 | 0 | 2 | 4 FALSE | YTHDC1    |
| 14382 | 3.034839 | 0.000153 | 0.329507 | 0 | 2 | 4 FALSE | ZBTB34    |
| 14384 | 3.034839 | 0.000153 | 0.329507 | 0 | 2 | 4 FALSE | ZBTB38    |
| 14390 | 3.352258 | 0.000159 | 0.298306 | 0 | 2 | 4 FALSE | ZBTB7A    |
| 14396 | 3.461382 | 0.00011  | 0.288902 | 0 | 2 | 4 FALSE | ZC3H6     |
| 14398 | 3.430415 | 0.000115 | 0.29151  | 0 | 2 | 4 FALSE | ZCCHC2    |
| 14400 | 3.469124 | 0.000166 | 0.288257 | 0 | 2 | 4 FALSE | ZDHC15    |
| 14410 | 3.327189 | 9.97E-05 | 0.300554 | 0 | 2 | 4 FALSE | ZFAND6    |
| 14430 | 3.034839 | 0.000153 | 0.329507 | 0 | 2 | 4 FALSE | ZKSCAN1   |
| 14434 | 3.034839 | 0.000153 | 0.329507 | 0 | 2 | 4 FALSE | ZMAT3     |
| 14436 | 3.034839 | 0.000153 | 0.329507 | 0 | 2 | 4 FALSE | ZMYM2     |
| 14438 | 3.305438 | 0.000177 | 0.302532 | 0 | 2 | 4 FALSE | ZNF100    |
| 14446 | 3.280737 | 0.000183 | 0.30481  | 0 | 2 | 4 FALSE | ZNF146    |
| 14474 | 3.034839 | 0.000153 | 0.329507 | 0 | 2 | 4 FALSE | ZNF431    |
| 14488 | 3.280737 | 0.000183 | 0.30481  | 0 | 2 | 4 FALSE | ZNF567    |
| 14500 | 3.034839 | 0.000153 | 0.329507 | 0 | 2 | 4 FALSE | ZNF654    |
| 14502 | 3.034839 | 0.000153 | 0.329507 | 0 | 2 | 4 FALSE | ZNF655    |
| 14522 | 3.034839 | 0.000153 | 0.329507 | 0 | 2 | 4 FALSE | ZNF800    |
| 14524 | 3.352258 | 0.000159 | 0.298306 | 0 | 2 | 4 FALSE | ZNF827    |
| 14534 | 3.305438 | 0.000177 | 0.302532 | 0 | 2 | 4 FALSE | ZSWIM6    |
| 14539 | 3.576774 | 0.000369 | 0.279582 | 0 | 2 | 4 FALSE | AAED1     |
| 14563 | 3.576774 | 0.000369 | 0.279582 | 0 | 2 | 4 FALSE | ALG9      |
| 14575 | 3.576774 | 0.000369 | 0.279582 | 0 | 2 | 4 FALSE | AQR       |
| 14579 | 3.223963 | 0.000389 | 0.310177 | 0 | 2 | 4 FALSE | ARL10     |
| 14584 | 3.726452 | 8.37E-05 | 0.268352 | 0 | 2 | 4 FALSE | ASB16     |
| 14607 | 3.726452 | 8.37E-05 | 0.268352 | 0 | 2 | 4 FALSE | BLOC1S4   |
| 14613 | 3.726452 | 8.37E-05 | 0.268352 | 0 | 2 | 4 FALSE | C11orf54  |
| 14615 | 3.726452 | 8.37E-05 | 0.268352 | 0 | 2 | 4 FALSE | C11orf98  |
| 14617 | 3.726452 | 8.37E-05 | 0.268352 | 0 | 2 | 4 FALSE | C17orf105 |
| 14621 | 3.501567 | 0.000273 | 0.285586 | 0 | 2 | 4 FALSE | C1orf50   |
| 14625 | 3.726452 | 8.37E-05 | 0.268352 | 0 | 2 | 4 FALSE | C3        |
| 14653 | 3.726452 | 8.37E-05 | 0.268352 | 0 | 2 | 4 FALSE | CCDC38    |
| 14659 | 3.730507 | 0.000148 | 0.26806  | 0 | 2 | 4 FALSE | CCL16     |

|       |          |          |          |   |   |         |           |
|-------|----------|----------|----------|---|---|---------|-----------|
| 14664 | 3.726452 | 8.37E-05 | 0.268352 | 0 | 2 | 4 FALSE | CD209     |
| 14668 | 3.549124 | 0.000383 | 0.28176  | 0 | 2 | 4 FALSE | CD63      |
| 14690 | 3.764793 | 0.000158 | 0.265619 | 0 | 2 | 4 FALSE | CLMP      |
| 14704 | 3.501567 | 0.000273 | 0.285586 | 0 | 2 | 4 FALSE | COX6B1    |
| 14706 | 3.223963 | 0.000389 | 0.310177 | 0 | 2 | 4 FALSE | CREB1     |
| 14714 | 3.501567 | 0.000273 | 0.285586 | 0 | 2 | 4 FALSE | CSE1L     |
| 14745 | 3.223963 | 0.000389 | 0.310177 | 0 | 2 | 4 FALSE | DNAL1     |
| 14753 | 3.726452 | 8.37E-05 | 0.268352 | 0 | 2 | 4 FALSE | DUSP28    |
| 14757 | 3.719447 | 0.000245 | 0.268857 | 0 | 2 | 4 FALSE | EHD4      |
| 14763 | 3.730507 | 0.000148 | 0.26806  | 0 | 2 | 4 FALSE | ELOVL6    |
| 14767 | 3.223963 | 0.000389 | 0.310177 | 0 | 2 | 4 FALSE | ENPP1     |
| 14769 | 3.549124 | 0.000383 | 0.28176  | 0 | 2 | 4 FALSE | ENTPD1    |
| 14771 | 3.549124 | 0.000383 | 0.28176  | 0 | 2 | 4 FALSE | EPB41     |
| 14773 | 3.576774 | 0.000369 | 0.279582 | 0 | 2 | 4 FALSE | EPRS      |
| 14785 | 3.501567 | 0.000273 | 0.285586 | 0 | 2 | 4 FALSE | FAM241A   |
| 14789 | 3.501567 | 0.000273 | 0.285586 | 0 | 2 | 4 FALSE | FAXC      |
| 14816 | 3.501567 | 0.000273 | 0.285586 | 0 | 2 | 4 FALSE | GABPB2    |
| 14823 | 3.764793 | 0.000158 | 0.265619 | 0 | 2 | 4 FALSE | GJD3      |
| 14827 | 3.632074 | 0.000339 | 0.275325 | 0 | 2 | 4 FALSE | GLB1L3    |
| 14833 | 3.501567 | 0.000273 | 0.285586 | 0 | 2 | 4 FALSE | GNL3L     |
| 14841 | 3.223963 | 0.000389 | 0.310177 | 0 | 2 | 4 FALSE | GPBP1L1   |
| 14849 | 3.789862 | 0.000124 | 0.263862 | 0 | 2 | 4 FALSE | HAUS3     |
| 14857 | 3.726452 | 8.37E-05 | 0.268352 | 0 | 2 | 4 FALSE | HIST1H2AC |
| 14859 | 3.576774 | 0.000369 | 0.279582 | 0 | 2 | 4 FALSE | HIST1H2AF |
| 14869 | 3.764793 | 0.000158 | 0.265619 | 0 | 2 | 4 FALSE | HSD17B12  |
| 14877 | 3.501567 | 0.000273 | 0.285586 | 0 | 2 | 4 FALSE | IKZF3     |
| 14888 | 3.549124 | 0.000383 | 0.28176  | 0 | 2 | 4 FALSE | ISY1      |
| 14904 | 3.730507 | 0.000148 | 0.26806  | 0 | 2 | 4 FALSE | KIAA1958  |
| 14908 | 3.223963 | 0.000389 | 0.310177 | 0 | 2 | 4 FALSE | KIF3A     |
| 14937 | 3.726452 | 8.37E-05 | 0.268352 | 0 | 2 | 4 FALSE | LPIN3     |
| 14940 | 3.730507 | 0.000148 | 0.26806  | 0 | 2 | 4 FALSE | LRRC3C    |
| 14948 | 3.501567 | 0.000273 | 0.285586 | 0 | 2 | 4 FALSE | LYRM4     |
| 14955 | 3.223963 | 0.000389 | 0.310177 | 0 | 2 | 4 FALSE | MBD3      |
| 14957 | 3.726452 | 8.37E-05 | 0.268352 | 0 | 2 | 4 FALSE | MCF2L2    |
| 14978 | 3.223963 | 0.000389 | 0.310177 | 0 | 2 | 4 FALSE | MFSD2A    |
| 14986 | 3.576774 | 0.000369 | 0.279582 | 0 | 2 | 4 FALSE | MIXL1     |
| 14989 | 3.719447 | 0.000245 | 0.268857 | 0 | 2 | 4 FALSE | MOGAT1    |
| 14991 | 3.719447 | 0.000245 | 0.268857 | 0 | 2 | 4 FALSE | MPLKIP    |
| 14993 | 3.549124 | 0.000383 | 0.28176  | 0 | 2 | 4 FALSE | MPZL3     |
| 14999 | 3.632074 | 0.000339 | 0.275325 | 0 | 2 | 4 FALSE | MRNIP     |
| 15001 | 3.726452 | 8.37E-05 | 0.268352 | 0 | 2 | 4 FALSE | MRPS21    |
| 15009 | 3.223963 | 0.000389 | 0.310177 | 0 | 2 | 4 FALSE | MTX3      |
| 15019 | 3.576774 | 0.000369 | 0.279582 | 0 | 2 | 4 FALSE | MYO1C     |
| 15021 | 3.501567 | 0.000273 | 0.285586 | 0 | 2 | 4 FALSE | MYPN      |
| 15027 | 3.549124 | 0.000383 | 0.28176  | 0 | 2 | 4 FALSE | NEK9      |
| 15037 | 3.726452 | 8.37E-05 | 0.268352 | 0 | 2 | 4 FALSE | NOL9      |
| 15050 | 3.501567 | 0.000273 | 0.285586 | 0 | 2 | 4 FALSE | NUP155    |

|       |          |          |          |   |   |         |           |
|-------|----------|----------|----------|---|---|---------|-----------|
| 15052 | 3.223963 | 0.000389 | 0.310177 | 0 | 2 | 4 FALSE | NUP35     |
| 15057 | 3.501567 | 0.000273 | 0.285586 | 0 | 2 | 4 FALSE | OAS3      |
| 15063 | 3.597419 | 0.00021  | 0.277977 | 0 | 2 | 4 FALSE | OLFML2A   |
| 15067 | 3.501567 | 0.000273 | 0.285586 | 0 | 2 | 4 FALSE | OR7D2     |
| 15076 | 3.223963 | 0.000389 | 0.310177 | 0 | 2 | 4 FALSE | PAICS     |
| 15081 | 3.726452 | 8.37E-05 | 0.268352 | 0 | 2 | 4 FALSE | PCNP      |
| 15083 | 3.719447 | 0.000245 | 0.268857 | 0 | 2 | 4 FALSE | PDCL3     |
| 15089 | 3.223963 | 0.000389 | 0.310177 | 0 | 2 | 4 FALSE | PGK1      |
| 15095 | 3.223963 | 0.000389 | 0.310177 | 0 | 2 | 4 FALSE | PKNOX1    |
| 15108 | 3.763318 | 0.000209 | 0.265723 | 0 | 2 | 4 FALSE | POLA2     |
| 15110 | 3.719447 | 0.000245 | 0.268857 | 0 | 2 | 4 FALSE | POLQ      |
| 15118 | 3.501567 | 0.000273 | 0.285586 | 0 | 2 | 4 FALSE | PPIL4     |
| 15134 | 3.223963 | 0.000389 | 0.310177 | 0 | 2 | 4 FALSE | PRRG4     |
| 15136 | 3.790599 | 0.000271 | 0.263811 | 0 | 2 | 4 FALSE | PRX       |
| 15159 | 3.576774 | 0.000369 | 0.279582 | 0 | 2 | 4 FALSE | RABGEF1   |
| 15166 | 3.730507 | 0.000148 | 0.26806  | 0 | 2 | 4 FALSE | RBM23     |
| 15168 | 3.726452 | 8.37E-05 | 0.268352 | 0 | 2 | 4 FALSE | RBM43     |
| 15191 | 3.223963 | 0.000389 | 0.310177 | 0 | 2 | 4 FALSE | RPL27A    |
| 15196 | 3.501567 | 0.000273 | 0.285586 | 0 | 2 | 4 FALSE | RPS19     |
| 15206 | 3.730507 | 0.000148 | 0.26806  | 0 | 2 | 4 FALSE | SCARF1    |
| 15210 | 3.223963 | 0.000389 | 0.310177 | 0 | 2 | 4 FALSE | SEC63     |
| 15212 | 3.726452 | 8.37E-05 | 0.268352 | 0 | 2 | 4 FALSE | SEPHS1    |
| 15216 | 3.600737 | 0.000191 | 0.277721 | 0 | 2 | 4 FALSE | SETD1A    |
| 15224 | 3.726452 | 8.37E-05 | 0.268352 | 0 | 2 | 4 FALSE | SIGLEC9   |
| 15235 | 3.501567 | 0.000273 | 0.285586 | 0 | 2 | 4 FALSE | SLC25A16  |
| 15237 | 3.223963 | 0.000389 | 0.310177 | 0 | 2 | 4 FALSE | SLC30A4   |
| 15247 | 3.726452 | 8.37E-05 | 0.268352 | 0 | 2 | 4 FALSE | SLX4      |
| 15259 | 3.223963 | 0.000389 | 0.310177 | 0 | 2 | 4 FALSE | SPRYD4    |
| 15275 | 3.501567 | 0.000273 | 0.285586 | 0 | 2 | 4 FALSE | STAR      |
| 15283 | 3.764793 | 0.000158 | 0.265619 | 0 | 2 | 4 FALSE | STX7      |
| 15300 | 3.549124 | 0.000383 | 0.28176  | 0 | 2 | 4 FALSE | TAF8      |
| 15317 | 3.223963 | 0.000389 | 0.310177 | 0 | 2 | 4 FALSE | TIMELESS  |
| 15324 | 3.223963 | 0.000389 | 0.310177 | 0 | 2 | 4 FALSE | TIPIN     |
| 15326 | 3.549124 | 0.000383 | 0.28176  | 0 | 2 | 4 FALSE | TMCO1     |
| 15330 | 3.726452 | 8.37E-05 | 0.268352 | 0 | 2 | 4 FALSE | TMEM120f  |
| 15343 | 3.597419 | 0.00021  | 0.277977 | 0 | 2 | 4 FALSE | TMEM67    |
| 15345 | 3.726452 | 8.37E-05 | 0.268352 | 0 | 2 | 4 FALSE | TNFRSF10A |
| 15349 | 3.726452 | 8.37E-05 | 0.268352 | 0 | 2 | 4 FALSE | TNFRSF13C |
| 15354 | 3.764793 | 0.000158 | 0.265619 | 0 | 2 | 4 FALSE | TRAF1     |
| 15360 | 3.726452 | 8.37E-05 | 0.268352 | 0 | 2 | 4 FALSE | TRAPPC2   |
| 15368 | 3.632074 | 0.000339 | 0.275325 | 0 | 2 | 4 FALSE | TRIM65    |
| 15372 | 3.501567 | 0.000273 | 0.285586 | 0 | 2 | 4 FALSE | TRMT2B    |
| 15416 | 3.726452 | 8.37E-05 | 0.268352 | 0 | 2 | 4 FALSE | VPS53     |
| 15429 | 3.730507 | 0.000148 | 0.26806  | 0 | 2 | 4 FALSE | ZADH2     |
| 15431 | 3.726452 | 8.37E-05 | 0.268352 | 0 | 2 | 4 FALSE | ZBTB8B    |
| 15446 | 3.223963 | 0.000389 | 0.310177 | 0 | 2 | 4 FALSE | ZNF138    |
| 15461 | 3.501567 | 0.000273 | 0.285586 | 0 | 2 | 4 FALSE | ZNF417    |

|       |          |          |          |   |     |   |       |                  |
|-------|----------|----------|----------|---|-----|---|-------|------------------|
| 15467 | 3.223963 | 0.000389 | 0.310177 | 0 | 2   | 4 | FALSE | ZNF460           |
| 15470 | 3.719447 | 0.000245 | 0.268857 | 0 | 2   | 4 | FALSE | ZNF543           |
| 15474 | 3.726452 | 8.37E-05 | 0.268352 | 0 | 2   | 4 | FALSE | ZNF556           |
| 15478 | 3.726452 | 8.37E-05 | 0.268352 | 0 | 2   | 4 | FALSE | ZNF566           |
| 15486 | 3.775484 | 0.0002   | 0.264867 | 0 | 2   | 4 | FALSE | ZNF652           |
| 15504 | 3.447005 | 0.000153 | 0.290107 | 0 | 2   | 4 | FALSE | 3-Sep            |
| 15506 | 3.140277 | 0.000199 | 0.318443 | 0 | 2   | 4 | FALSE | 9-Mar            |
| 15510 | 3.470968 | 0.000153 | 0.288104 | 0 | 2   | 4 | FALSE | AARS             |
| 15513 | 3.140277 | 0.000199 | 0.318443 | 0 | 2   | 4 | FALSE | ABAT             |
| 15523 | 3.140277 | 0.000199 | 0.318443 | 0 | 2   | 4 | FALSE | ACD              |
| 15539 | 3.140277 | 0.000199 | 0.318443 | 0 | 2   | 4 | FALSE | AGPAT3           |
| 15568 | 3.140277 | 0.000199 | 0.318443 | 0 | 2   | 4 | FALSE | AMOTL1           |
| 15593 | 3.595207 | 0.00014  | 0.278148 | 0 | 2   | 4 | FALSE | APAF1            |
| 15595 | 3.644977 | 0.000171 | 0.27435  | 0 | 2   | 4 | FALSE | APOL6            |
| 15609 | 3.140277 | 0.000199 | 0.318443 | 0 | 2   | 4 | FALSE | ARRDC3           |
| 15614 | 3.642396 | 0.00013  | 0.274545 | 0 | 2   | 4 | FALSE | ASB8             |
| 15618 | 3.470968 | 0.000153 | 0.288104 | 0 | 2   | 4 | FALSE | ASPH             |
| 15620 | 3.140277 | 0.000199 | 0.318443 | 0 | 2   | 4 | FALSE | ASXL2            |
| 15624 | 3.6      | 0.000173 | 0.277778 | 0 | 2   | 4 | FALSE | ATF7             |
| 15628 | 3.140277 | 0.000199 | 0.318443 | 0 | 2   | 4 | FALSE | ATP2B4           |
| 15633 | 3.140277 | 0.000199 | 0.318443 | 0 | 2   | 4 | FALSE | ATXN7            |
| 15650 | 3.516682 | 0.000156 | 0.284359 | 0 | 2   | 4 | FALSE | BCL2             |
| 15654 | 3.140277 | 0.000199 | 0.318443 | 0 | 2   | 4 | FALSE | BCL3             |
| 15656 | 3.470968 | 0.000153 | 0.288104 | 0 | 2   | 4 | FALSE | BLOC1S5-T        |
| 15658 | 3.470968 | 0.000153 | 0.288104 | 0 | 2   | 4 | FALSE | BNIP3            |
| 15697 | 3.6      | 0.000173 | 0.277778 | 0 | 2   | 4 | FALSE | CANX             |
| 15701 | 3.447005 | 0.000153 | 0.290107 | 0 | 2   | 4 | FALSE | CASP4            |
| 15705 | 3.140277 | 0.000199 | 0.318443 | 0 | 2   | 4 | FALSE | CAST             |
| 15732 | 3.485346 | 0.000106 | 0.286916 | 0 | 2   | 4 | FALSE | CD83             |
| 15789 | 3.644977 | 0.000171 | 0.27435  | 0 | 2   | 4 | FALSE | COMMD2           |
| 15795 | 3.642396 | 0.00013  | 0.274545 | 0 | 2   | 4 | FALSE | CPA4             |
| 15818 | 3.447005 | 0.000153 | 0.290107 | 0 | 2   | 4 | FALSE | CSRNP2           |
| 15826 | 3.642396 | 0.00013  | 0.274545 | 0 | 2   | 4 | FALSE | CTNNA1           |
| 15828 | 3.470968 | 0.000153 | 0.288104 | 0 | 2   | 4 | FALSE | CTNND1           |
| 15832 | 3.485346 | 0.000106 | 0.286916 | 0 | 2   | 4 | FALSE | CXCL12           |
| 15841 | 3.140277 | 0.000199 | 0.318443 | 0 | 2   | 4 | FALSE | DAD1             |
| 15845 | 3.140277 | 0.000199 | 0.318443 | 0 | 2   | 4 | FALSE | DBF4             |
| 15862 | 3.140277 | 0.000199 | 0.318443 | 0 | 2   | 4 | FALSE | DHX30            |
| 15878 | 3.140277 | 0.000199 | 0.318443 | 0 | 2   | 4 | FALSE | DRAM1            |
| 15893 | 3.140277 | 0.000199 | 0.318443 | 0 | 2   | 4 | FALSE | E2F8             |
| 15895 | 3.516682 | 0.000156 | 0.284359 | 0 | 2   | 4 | FALSE | EEF1D            |
| 15902 | 3.140277 | 0.000199 | 0.318443 | 0 | 2   | 4 | FALSE | EIF1AD           |
| 15904 | 3.140277 | 0.000199 | 0.318443 | 0 | 2   | 4 | FALSE | EIF2AK1          |
| 15916 | 3.447005 | 0.000153 | 0.290107 | 0 | 2   | 4 | FALSE | EIF4G1           |
| 14536 | 2.806636 | 0.120157 | 0.356298 | 0 | 516 | 3 | FALSE | miRNA hsa-miR-12 |
| 15921 | 3.140277 | 0.000199 | 0.318443 | 0 | 2   | 4 | FALSE | ELL2             |
| 15927 | 3.140277 | 0.000199 | 0.318443 | 0 | 2   | 4 | FALSE | ELOVL5           |

|       |          |          |          |   |   |         |           |
|-------|----------|----------|----------|---|---|---------|-----------|
| 15938 | 3.140277 | 0.000199 | 0.318443 | 0 | 2 | 4 FALSE | EPG5      |
| 15942 | 3.470968 | 0.000153 | 0.288104 | 0 | 2 | 4 FALSE | ERBB3     |
| 15948 | 3.659724 | 7.97E-05 | 0.273245 | 0 | 2 | 4 FALSE | ESYT2     |
| 15955 | 3.140277 | 0.000199 | 0.318443 | 0 | 2 | 4 FALSE | FAM102A   |
| 15957 | 3.595207 | 0.00014  | 0.278148 | 0 | 2 | 4 FALSE | FAM107B   |
| 15961 | 3.470968 | 0.000153 | 0.288104 | 0 | 2 | 4 FALSE | FAM127B   |
| 15963 | 3.140277 | 0.000199 | 0.318443 | 0 | 2 | 4 FALSE | FAM134C   |
| 15976 | 3.6      | 0.000173 | 0.277778 | 0 | 2 | 4 FALSE | FAM83H    |
| 15992 | 3.581567 | 0.000297 | 0.279207 | 0 | 2 | 4 FALSE | FNBP1     |
| 15997 | 3.516682 | 0.000156 | 0.284359 | 0 | 2 | 4 FALSE | FNDC3B    |
| 16003 | 3.447005 | 0.000153 | 0.290107 | 0 | 2 | 4 FALSE | FOXM1     |
| 16015 | 3.140277 | 0.000199 | 0.318443 | 0 | 2 | 4 FALSE | GABARAPL  |
| 16022 | 3.140277 | 0.000199 | 0.318443 | 0 | 2 | 4 FALSE | GALNT6    |
| 16024 | 3.516682 | 0.000156 | 0.284359 | 0 | 2 | 4 FALSE | GAS1      |
| 16031 | 3.140277 | 0.000199 | 0.318443 | 0 | 2 | 4 FALSE | GFPT1     |
| 16033 | 3.595207 | 0.00014  | 0.278148 | 0 | 2 | 4 FALSE | GGA2      |
| 16042 | 3.447005 | 0.000153 | 0.290107 | 0 | 2 | 4 FALSE | GLI2      |
| 16048 | 3.470968 | 0.000153 | 0.288104 | 0 | 2 | 4 FALSE | GLUL      |
| 16059 | 3.595207 | 0.00014  | 0.278148 | 0 | 2 | 4 FALSE | GPATCH8   |
| 16061 | 3.447005 | 0.000153 | 0.290107 | 0 | 2 | 4 FALSE | GPD1L     |
| 16086 | 3.140277 | 0.000199 | 0.318443 | 0 | 2 | 4 FALSE | HDLBP     |
| 16094 | 3.470968 | 0.000153 | 0.288104 | 0 | 2 | 4 FALSE | HIPK2     |
| 16097 | 3.140277 | 0.000199 | 0.318443 | 0 | 2 | 4 FALSE | HIST1H2BC |
| 16103 | 3.470968 | 0.000153 | 0.288104 | 0 | 2 | 4 FALSE | HK2       |
| 16111 | 3.516682 | 0.000156 | 0.284359 | 0 | 2 | 4 FALSE | HNF4A     |
| 16169 | 3.470968 | 0.000153 | 0.288104 | 0 | 2 | 4 FALSE | JAG1      |
| 16189 | 3.581567 | 0.000297 | 0.279207 | 0 | 2 | 4 FALSE | KAT7      |
| 16196 | 3.140277 | 0.000199 | 0.318443 | 0 | 2 | 4 FALSE | KDM2A     |
| 16202 | 3.492719 | 9.03E-05 | 0.28631  | 0 | 2 | 4 FALSE | KIAA0430  |
| 16204 | 3.140277 | 0.000199 | 0.318443 | 0 | 2 | 4 FALSE | KIAA0930  |
| 16212 | 3.470968 | 0.000153 | 0.288104 | 0 | 2 | 4 FALSE | KLF5      |
| 16221 | 3.447005 | 0.000153 | 0.290107 | 0 | 2 | 4 FALSE | KRAS      |
| 16224 | 3.140277 | 0.000199 | 0.318443 | 0 | 2 | 4 FALSE | LAMC1     |
| 16226 | 3.447005 | 0.000153 | 0.290107 | 0 | 2 | 4 FALSE | LCT       |
| 16231 | 3.470968 | 0.000153 | 0.288104 | 0 | 2 | 4 FALSE | LILRB1    |
| 16233 | 3.447005 | 0.000153 | 0.290107 | 0 | 2 | 4 FALSE | LIMD1     |
| 16253 | 3.637235 | 9.16E-05 | 0.274934 | 0 | 2 | 4 FALSE | LRRC2     |
| 16255 | 3.516682 | 0.000156 | 0.284359 | 0 | 2 | 4 FALSE | LRRC41    |
| 16257 | 3.6      | 0.000173 | 0.277778 | 0 | 2 | 4 FALSE | LURAP1L   |
| 16272 | 3.140277 | 0.000199 | 0.318443 | 0 | 2 | 4 FALSE | MARS2     |
| 16276 | 3.470968 | 0.000153 | 0.288104 | 0 | 2 | 4 FALSE | MCM2      |
| 16280 | 3.516682 | 0.000156 | 0.284359 | 0 | 2 | 4 FALSE | MCM3AP    |
| 16284 | 3.595207 | 0.00014  | 0.278148 | 0 | 2 | 4 FALSE | MCOLN2    |
| 16295 | 3.447005 | 0.000153 | 0.290107 | 0 | 2 | 4 FALSE | MED22     |
| 16319 | 3.470968 | 0.000153 | 0.288104 | 0 | 2 | 4 FALSE | MMP14     |
| 16323 | 3.470968 | 0.000153 | 0.288104 | 0 | 2 | 4 FALSE | MMP9      |
| 16331 | 3.644977 | 0.000171 | 0.27435  | 0 | 2 | 4 FALSE | MTA3      |

|       |          |          |          |   |   |         |          |
|-------|----------|----------|----------|---|---|---------|----------|
| 16337 | 3.485346 | 0.000106 | 0.286916 | 0 | 2 | 4 FALSE | MVD      |
| 16340 | 3.447005 | 0.000153 | 0.290107 | 0 | 2 | 4 FALSE | MYCBP    |
| 16345 | 3.140277 | 0.000199 | 0.318443 | 0 | 2 | 4 FALSE | NAPEPLD  |
| 16358 | 3.485346 | 0.000106 | 0.286916 | 0 | 2 | 4 FALSE | NFAT5    |
| 16360 | 3.470968 | 0.000153 | 0.288104 | 0 | 2 | 4 FALSE | NFATC1   |
| 16366 | 3.447005 | 0.000153 | 0.290107 | 0 | 2 | 4 FALSE | NFYB     |
| 16368 | 3.140277 | 0.000199 | 0.318443 | 0 | 2 | 4 FALSE | NIPBL    |
| 16376 | 3.485346 | 0.000106 | 0.286916 | 0 | 2 | 4 FALSE | NOS1     |
| 16387 | 3.140277 | 0.000199 | 0.318443 | 0 | 2 | 4 FALSE | NR2C2    |
| 16389 | 3.447005 | 0.000153 | 0.290107 | 0 | 2 | 4 FALSE | NR2F1    |
| 16401 | 3.516682 | 0.000156 | 0.284359 | 0 | 2 | 4 FALSE | NUDT3    |
| 16438 | 3.470968 | 0.000153 | 0.288104 | 0 | 2 | 4 FALSE | PDE3A    |
| 16440 | 3.6      | 0.000173 | 0.277778 | 0 | 2 | 4 FALSE | PDE4DIP  |
| 16446 | 3.634286 | 0.000167 | 0.275157 | 0 | 2 | 4 FALSE | PDIA5    |
| 16453 | 3.140277 | 0.000199 | 0.318443 | 0 | 2 | 4 FALSE | PFN1     |
| 16462 | 3.140277 | 0.000199 | 0.318443 | 0 | 2 | 4 FALSE | PIK3R1   |
| 16487 | 3.140277 | 0.000199 | 0.318443 | 0 | 2 | 4 FALSE | POGZ     |
| 16530 | 3.516682 | 0.000156 | 0.284359 | 0 | 2 | 4 FALSE | PTPN11   |
| 16532 | 3.516682 | 0.000156 | 0.284359 | 0 | 2 | 4 FALSE | PTPN23   |
| 16536 | 3.140277 | 0.000199 | 0.318443 | 0 | 2 | 4 FALSE | PXDN     |
| 16554 | 3.140277 | 0.000199 | 0.318443 | 0 | 2 | 4 FALSE | RAN      |
| 16558 | 3.516682 | 0.000156 | 0.284359 | 0 | 2 | 4 FALSE | RARG     |
| 16576 | 3.140277 | 0.000199 | 0.318443 | 0 | 2 | 4 FALSE | RCOR1    |
| 16584 | 3.516682 | 0.000156 | 0.284359 | 0 | 2 | 4 FALSE | RGP1     |
| 16608 | 3.581567 | 0.000297 | 0.279207 | 0 | 2 | 4 FALSE | RPP30    |
| 16618 | 3.581567 | 0.000297 | 0.279207 | 0 | 2 | 4 FALSE | RRP7A    |
| 16636 | 3.140277 | 0.000199 | 0.318443 | 0 | 2 | 4 FALSE | SDC1     |
| 16638 | 3.485346 | 0.000106 | 0.286916 | 0 | 2 | 4 FALSE | SDCBP    |
| 16645 | 3.6      | 0.000173 | 0.277778 | 0 | 2 | 4 FALSE | SENP2    |
| 16647 | 3.470968 | 0.000153 | 0.288104 | 0 | 2 | 4 FALSE | SENP5    |
| 16670 | 3.447005 | 0.000153 | 0.290107 | 0 | 2 | 4 FALSE | SKAP2    |
| 16677 | 3.470968 | 0.000153 | 0.288104 | 0 | 2 | 4 FALSE | SLC25A25 |
| 16680 | 3.6      | 0.000173 | 0.277778 | 0 | 2 | 4 FALSE | SLC25A36 |
| 16684 | 3.140277 | 0.000199 | 0.318443 | 0 | 2 | 4 FALSE | SLC25A44 |
| 16686 | 3.595207 | 0.00014  | 0.278148 | 0 | 2 | 4 FALSE | SLC25A46 |
| 16709 | 3.470968 | 0.000153 | 0.288104 | 0 | 2 | 4 FALSE | SLC7A6   |
| 16713 | 3.447005 | 0.000153 | 0.290107 | 0 | 2 | 4 FALSE | SMARCC1  |
| 16715 | 3.140277 | 0.000199 | 0.318443 | 0 | 2 | 4 FALSE | SMARCD2  |
| 16717 | 3.447005 | 0.000153 | 0.290107 | 0 | 2 | 4 FALSE | SMC1A    |
| 16724 | 3.516682 | 0.000156 | 0.284359 | 0 | 2 | 4 FALSE | SOAT1    |
| 16728 | 3.140277 | 0.000199 | 0.318443 | 0 | 2 | 4 FALSE | SOCS4    |
| 16752 | 3.659724 | 7.97E-05 | 0.273245 | 0 | 2 | 4 FALSE | SSH2     |
| 16755 | 3.140277 | 0.000199 | 0.318443 | 0 | 2 | 4 FALSE | STOX2    |
| 16767 | 3.6      | 0.000173 | 0.277778 | 0 | 2 | 4 FALSE | SYT7     |
| 16773 | 3.634286 | 0.000167 | 0.275157 | 0 | 2 | 4 FALSE | TAF1D    |
| 16779 | 3.516682 | 0.000156 | 0.284359 | 0 | 2 | 4 FALSE | TAOK2    |
| 16790 | 3.447005 | 0.000153 | 0.290107 | 0 | 2 | 4 FALSE | TERT     |

|       |          |          |          |   |   |         |           |
|-------|----------|----------|----------|---|---|---------|-----------|
| 16819 | 3.140277 | 0.000199 | 0.318443 | 0 | 2 | 4 FALSE | TMEM178I  |
| 16835 | 3.140277 | 0.000199 | 0.318443 | 0 | 2 | 4 FALSE | TNF       |
| 16839 | 3.140277 | 0.000199 | 0.318443 | 0 | 2 | 4 FALSE | TNFRSF10E |
| 16841 | 3.140277 | 0.000199 | 0.318443 | 0 | 2 | 4 FALSE | TNIP1     |
| 16857 | 3.140277 | 0.000199 | 0.318443 | 0 | 2 | 4 FALSE | TRIM33    |
| 16869 | 3.516682 | 0.000156 | 0.284359 | 0 | 2 | 4 FALSE | TUBB      |
| 16878 | 3.140277 | 0.000199 | 0.318443 | 0 | 2 | 4 FALSE | UBAP2L    |
| 16886 | 3.595207 | 0.00014  | 0.278148 | 0 | 2 | 4 FALSE | UBE2V2    |
| 16899 | 3.140277 | 0.000199 | 0.318443 | 0 | 2 | 4 FALSE | USP12     |
| 16901 | 3.595207 | 0.00014  | 0.278148 | 0 | 2 | 4 FALSE | USP42     |
| 16905 | 3.140277 | 0.000199 | 0.318443 | 0 | 2 | 4 FALSE | USP6NL    |
| 16915 | 3.140277 | 0.000199 | 0.318443 | 0 | 2 | 4 FALSE | VPS45     |
| 16926 | 3.447005 | 0.000153 | 0.290107 | 0 | 2 | 4 FALSE | WDR6      |
| 16943 | 3.6      | 0.000173 | 0.277778 | 0 | 2 | 4 FALSE | YARS      |
| 16949 | 3.492719 | 9.03E-05 | 0.28631  | 0 | 2 | 4 FALSE | YWHAB     |
| 16954 | 3.485346 | 0.000106 | 0.286916 | 0 | 2 | 4 FALSE | ZBTB22    |
| 16965 | 3.595207 | 0.00014  | 0.278148 | 0 | 2 | 4 FALSE | ZC3H14    |
| 16969 | 3.581567 | 0.000297 | 0.279207 | 0 | 2 | 4 FALSE | ZC3HAV1L  |
| 16980 | 3.595207 | 0.00014  | 0.278148 | 0 | 2 | 4 FALSE | ZFP36L1   |
| 16986 | 3.140277 | 0.000199 | 0.318443 | 0 | 2 | 4 FALSE | ZIC5      |
| 16988 | 3.140277 | 0.000199 | 0.318443 | 0 | 2 | 4 FALSE | ZMIZ2     |
| 16998 | 3.447005 | 0.000153 | 0.290107 | 0 | 2 | 4 FALSE | ZNF277    |
| 17002 | 3.492719 | 9.03E-05 | 0.28631  | 0 | 2 | 4 FALSE | ZNF3      |
| 17013 | 3.140277 | 0.000199 | 0.318443 | 0 | 2 | 4 FALSE | ZNF503    |
| 17021 | 3.581567 | 0.000297 | 0.279207 | 0 | 2 | 4 FALSE | ZNF708    |
| 17023 | 3.447005 | 0.000153 | 0.290107 | 0 | 2 | 4 FALSE | ZNF709    |
| 17025 | 3.140277 | 0.000199 | 0.318443 | 0 | 2 | 4 FALSE | ZNF711    |
| 17027 | 3.140277 | 0.000199 | 0.318443 | 0 | 2 | 4 FALSE | ZNF83     |
| 17029 | 3.581567 | 0.000297 | 0.279207 | 0 | 2 | 4 FALSE | ZNF878    |
| 17031 | 3.447005 | 0.000153 | 0.290107 | 0 | 2 | 4 FALSE | ZNFX1     |
| 17042 | 3.35447  | 0.000133 | 0.29811  | 0 | 2 | 4 FALSE | AFTPH     |
| 17046 | 3.35447  | 0.000133 | 0.29811  | 0 | 2 | 4 FALSE | AKAP2     |
| 17057 | 3.69106  | 9.96E-05 | 0.270925 | 0 | 2 | 4 FALSE | BUB1      |
| 17059 | 3.916682 | 4.72E-05 | 0.255318 | 0 | 2 | 6 FALSE | C8orf37   |
| 17081 | 3.723134 | 6.08E-05 | 0.268591 | 0 | 2 | 4 FALSE | DESI1     |
| 17083 | 3.862857 | 7.93E-05 | 0.258876 | 0 | 2 | 4 FALSE | DHX36     |
| 17085 | 3.870968 | 6.31E-05 | 0.258333 | 0 | 2 | 4 FALSE | DNAJC10   |
| 17089 | 3.35447  | 0.000133 | 0.29811  | 0 | 2 | 4 FALSE | EIF4E2    |
| 17100 | 3.774378 | 0.000105 | 0.264944 | 0 | 2 | 4 FALSE | FNIP2     |
| 17121 | 3.35447  | 0.000133 | 0.29811  | 0 | 2 | 4 FALSE | LGALS1    |
| 17126 | 3.92     | 7.08E-05 | 0.255102 | 0 | 2 | 4 FALSE | LOX       |
| 17136 | 3.741567 | 6.12E-05 | 0.267268 | 0 | 2 | 4 FALSE | MMP16     |
| 17138 | 3.723134 | 6.08E-05 | 0.268591 | 0 | 2 | 4 FALSE | MTDH      |
| 17146 | 3.35447  | 0.000133 | 0.29811  | 0 | 2 | 4 FALSE | PALM2-AK  |
| 17152 | 3.35447  | 0.000133 | 0.29811  | 0 | 2 | 4 FALSE | PLXNC1    |
| 17157 | 3.774378 | 0.000105 | 0.264944 | 0 | 2 | 4 FALSE | POLL      |
| 17167 | 3.69106  | 9.96E-05 | 0.270925 | 0 | 2 | 4 FALSE | PRKAG1    |



|       |          |          |          |   |   |   |       |          |
|-------|----------|----------|----------|---|---|---|-------|----------|
| 17179 | 3.916682 | 4.72E-05 | 0.255318 | 0 | 2 | 6 | FALSE | RPS4X    |
| 17182 | 3.723134 | 6.08E-05 | 0.268591 | 0 | 2 | 4 | FALSE | SERPINA1 |
| 17192 | 3.862857 | 7.93E-05 | 0.258876 | 0 | 2 | 4 | FALSE | SLC38A9  |
| 17201 | 3.35447  | 0.000133 | 0.29811  | 0 | 2 | 4 | FALSE | STK38    |
| 17203 | 3.35447  | 0.000133 | 0.29811  | 0 | 2 | 4 | FALSE | TACSTD2  |
| 17211 | 3.35447  | 0.000133 | 0.29811  | 0 | 2 | 4 | FALSE | TMEM1061 |
| 17217 | 3.35447  | 0.000133 | 0.29811  | 0 | 2 | 4 | FALSE | TRIM23   |
| 17231 | 3.723134 | 6.08E-05 | 0.268591 | 0 | 2 | 4 | FALSE | ZNF37A   |
| 17234 | 3.916682 | 4.72E-05 | 0.255318 | 0 | 2 | 6 | FALSE | ZSCAN16  |
| 17242 | 3.20553  | 0.000196 | 0.311961 | 0 | 2 | 4 | FALSE | ABCA1    |
| 17244 | 3.517419 | 0.000166 | 0.284299 | 0 | 2 | 4 | FALSE | ABCC1    |
| 17259 | 3.517419 | 0.000166 | 0.284299 | 0 | 2 | 4 | FALSE | ACTR2    |
| 17265 | 3.20553  | 0.000196 | 0.311961 | 0 | 2 | 4 | FALSE | ADD3     |
| 17279 | 3.727926 | 8.23E-05 | 0.268246 | 0 | 2 | 4 | FALSE | ALDH18A1 |
| 17292 | 3.517419 | 0.000166 | 0.284299 | 0 | 2 | 4 | FALSE | ANPEP    |
| 17309 | 3.20553  | 0.000196 | 0.311961 | 0 | 2 | 4 | FALSE | ARL6IP5  |
| 17313 | 3.71871  | 0.000128 | 0.26891  | 0 | 2 | 4 | FALSE | ATP9A    |
| 17315 | 3.517419 | 0.000166 | 0.284299 | 0 | 2 | 4 | FALSE | ATRN     |
| 17342 | 3.20553  | 0.000196 | 0.311961 | 0 | 2 | 4 | FALSE | BTG1     |
| 17347 | 3.597051 | 0.00014  | 0.278006 | 0 | 2 | 4 | FALSE | C15orf39 |
| 17363 | 3.676313 | 0.000138 | 0.272012 | 0 | 2 | 4 | FALSE | CAV2     |
| 17385 | 3.517419 | 0.000166 | 0.284299 | 0 | 2 | 4 | FALSE | CDCP1    |
| 17387 | 3.597051 | 0.00014  | 0.278006 | 0 | 2 | 4 | FALSE | CDH1     |
| 17406 | 3.20553  | 0.000196 | 0.311961 | 0 | 2 | 4 | FALSE | CITED2   |
| 17412 | 3.597051 | 0.00014  | 0.278006 | 0 | 2 | 4 | FALSE | CLDN12   |
| 17427 | 3.517419 | 0.000166 | 0.284299 | 0 | 2 | 4 | FALSE | COL6A1   |
| 17429 | 3.517419 | 0.000166 | 0.284299 | 0 | 2 | 4 | FALSE | CORO1C   |
| 17444 | 3.20553  | 0.000196 | 0.311961 | 0 | 2 | 4 | FALSE | CSRNP3   |
| 17449 | 3.517419 | 0.000166 | 0.284299 | 0 | 2 | 4 | FALSE | CTNNBIP1 |
| 17473 | 3.727926 | 8.23E-05 | 0.268246 | 0 | 2 | 4 | FALSE | DFFA     |
| 17492 | 3.20553  | 0.000196 | 0.311961 | 0 | 2 | 4 | FALSE | DYNC1H1  |
| 17502 | 3.676313 | 0.000138 | 0.272012 | 0 | 2 | 4 | FALSE | EIF4E    |
| 17504 | 3.20553  | 0.000196 | 0.311961 | 0 | 2 | 4 | FALSE | EIF4G3   |
| 17509 | 3.517419 | 0.000166 | 0.284299 | 0 | 2 | 4 | FALSE | ENAH     |
| 17514 | 3.597051 | 0.00014  | 0.278006 | 0 | 2 | 4 | FALSE | ENTPD6   |
| 17530 | 3.20553  | 0.000196 | 0.311961 | 0 | 2 | 4 | FALSE | ESR1     |
| 17537 | 3.20553  | 0.000196 | 0.311961 | 0 | 2 | 4 | FALSE | EWSR1    |
| 17548 | 3.676313 | 0.000138 | 0.272012 | 0 | 2 | 4 | FALSE | FAM3C    |
| 17565 | 3.20553  | 0.000196 | 0.311961 | 0 | 2 | 4 | FALSE | FN3KRP   |
| 17578 | 3.662673 | 0.000376 | 0.273025 | 0 | 2 | 4 | FALSE | FXN      |
| 17602 | 3.20553  | 0.000196 | 0.311961 | 0 | 2 | 4 | FALSE | GOLM1    |
| 17606 | 3.727926 | 8.23E-05 | 0.268246 | 0 | 2 | 4 | FALSE | GPRASP1  |
| 17610 | 3.517419 | 0.000166 | 0.284299 | 0 | 2 | 4 | FALSE | GRN      |
| 17623 | 3.20553  | 0.000196 | 0.311961 | 0 | 2 | 4 | FALSE | HECW2    |
| 17628 | 3.20553  | 0.000196 | 0.311961 | 0 | 2 | 4 | FALSE | HIF1A    |
| 17638 | 3.727926 | 8.23E-05 | 0.268246 | 0 | 2 | 4 | FALSE | HMG20A   |
| 17640 | 3.517419 | 0.000166 | 0.284299 | 0 | 2 | 4 | FALSE | HMGA1    |

|       |          |          |          |   |   |         |          |
|-------|----------|----------|----------|---|---|---------|----------|
| 17644 | 3.20553  | 0.000196 | 0.311961 | 0 | 2 | 4 FALSE | HNRNPC   |
| 17652 | 3.517419 | 0.000166 | 0.284299 | 0 | 2 | 4 FALSE | HSPA8    |
| 17655 | 3.20553  | 0.000196 | 0.311961 | 0 | 2 | 4 FALSE | IBTK     |
| 17663 | 3.597051 | 0.00014  | 0.278006 | 0 | 2 | 4 FALSE | IGFBP4   |
| 17668 | 3.517419 | 0.000166 | 0.284299 | 0 | 2 | 4 FALSE | IL24     |
| 17674 | 3.517419 | 0.000166 | 0.284299 | 0 | 2 | 4 FALSE | INPPL1   |
| 17679 | 3.20553  | 0.000196 | 0.311961 | 0 | 2 | 4 FALSE | IRS2     |
| 17681 | 3.597051 | 0.00014  | 0.278006 | 0 | 2 | 4 FALSE | ITGA11   |
| 17690 | 3.676313 | 0.000138 | 0.272012 | 0 | 2 | 4 FALSE | ITSN1    |
| 17693 | 3.20553  | 0.000196 | 0.311961 | 0 | 2 | 4 FALSE | JADE1    |
| 17697 | 3.20553  | 0.000196 | 0.311961 | 0 | 2 | 4 FALSE | JUNB     |
| 17701 | 3.562396 | 0.000108 | 0.28071  | 0 | 2 | 4 FALSE | KCTD3    |
| 17712 | 3.562396 | 0.000108 | 0.28071  | 0 | 2 | 4 FALSE | KLF4     |
| 17728 | 3.20553  | 0.000196 | 0.311961 | 0 | 2 | 4 FALSE | LARS     |
| 17748 | 3.727926 | 8.23E-05 | 0.268246 | 0 | 2 | 4 FALSE | MADD     |
| 17784 | 3.597051 | 0.00014  | 0.278006 | 0 | 2 | 4 FALSE | MLLT1    |
| 17820 | 3.743779 | 6.72E-05 | 0.26711  | 0 | 2 | 4 FALSE | MYRF     |
| 17825 | 3.597051 | 0.00014  | 0.278006 | 0 | 2 | 4 FALSE | NANOG    |
| 17833 | 3.20553  | 0.000196 | 0.311961 | 0 | 2 | 4 FALSE | NCOA2    |
| 17851 | 3.517419 | 0.000166 | 0.284299 | 0 | 2 | 4 FALSE | NHLRC3   |
| 17855 | 3.20553  | 0.000196 | 0.311961 | 0 | 2 | 4 FALSE | NIPSNAP1 |
| 17878 | 3.662673 | 0.000376 | 0.273025 | 0 | 2 | 4 FALSE | NUP43    |
| 17880 | 3.681475 | 0.000179 | 0.27163  | 0 | 2 | 4 FALSE | OCLN     |
| 17882 | 3.681475 | 0.000179 | 0.27163  | 0 | 2 | 4 FALSE | ORC4     |
| 17898 | 3.20553  | 0.000196 | 0.311961 | 0 | 2 | 4 FALSE | PARD3    |
| 17915 | 3.517419 | 0.000166 | 0.284299 | 0 | 2 | 4 FALSE | PLAGL2   |
| 17941 | 3.20553  | 0.000196 | 0.311961 | 0 | 2 | 4 FALSE | PRKACB   |
| 17950 | 3.71871  | 0.000128 | 0.26891  | 0 | 2 | 4 FALSE | PRRX1    |
| 17968 | 3.517419 | 0.000166 | 0.284299 | 0 | 2 | 4 FALSE | RAB3IP   |
| 17970 | 3.676313 | 0.000138 | 0.272012 | 0 | 2 | 4 FALSE | RAB7A    |
| 17986 | 3.20553  | 0.000196 | 0.311961 | 0 | 2 | 4 FALSE | REV1     |
| 17990 | 3.517419 | 0.000166 | 0.284299 | 0 | 2 | 4 FALSE | RGS4     |
| 18001 | 3.557972 | 0.000123 | 0.281059 | 0 | 2 | 4 FALSE | ROCK1    |
| 18011 | 3.20553  | 0.000196 | 0.311961 | 0 | 2 | 4 FALSE | RRAGC    |
| 18014 | 3.517419 | 0.000166 | 0.284299 | 0 | 2 | 4 FALSE | RSBN1L   |
| 18029 | 3.20553  | 0.000196 | 0.311961 | 0 | 2 | 4 FALSE | SERINC5  |
| 18038 | 3.681475 | 0.000179 | 0.27163  | 0 | 2 | 4 FALSE | SET      |
| 18043 | 3.20553  | 0.000196 | 0.311961 | 0 | 2 | 4 FALSE | SH3KBP1  |
| 18062 | 3.20553  | 0.000196 | 0.311961 | 0 | 2 | 4 FALSE | SLC27A1  |
| 18064 | 3.20553  | 0.000196 | 0.311961 | 0 | 2 | 4 FALSE | SLC30A7  |
| 18074 | 3.20553  | 0.000196 | 0.311961 | 0 | 2 | 4 FALSE | SMAD5    |
| 18078 | 3.597051 | 0.00014  | 0.278006 | 0 | 2 | 4 FALSE | SNAI1    |
| 18080 | 3.20553  | 0.000196 | 0.311961 | 0 | 2 | 4 FALSE | SNAI2    |
| 18090 | 3.20553  | 0.000196 | 0.311961 | 0 | 2 | 4 FALSE | SOCS7    |
| 18108 | 3.557972 | 0.000123 | 0.281059 | 0 | 2 | 4 FALSE | SPP1     |
| 18117 | 3.20553  | 0.000196 | 0.311961 | 0 | 2 | 4 FALSE | SRGAP1   |
| 18152 | 3.681475 | 0.000179 | 0.27163  | 0 | 2 | 4 FALSE | TCF4     |

|       |          |          |          |   |   |         |          |
|-------|----------|----------|----------|---|---|---------|----------|
| 18158 | 3.557972 | 0.000123 | 0.281059 | 0 | 2 | 4 FALSE | TGFB1    |
| 18160 | 3.743779 | 6.72E-05 | 0.26711  | 0 | 2 | 4 FALSE | TGFB2    |
| 18164 | 3.20553  | 0.000196 | 0.311961 | 0 | 2 | 4 FALSE | TGFBI    |
| 18172 | 3.517419 | 0.000166 | 0.284299 | 0 | 2 | 4 FALSE | TIMP1    |
| 18181 | 3.20553  | 0.000196 | 0.311961 | 0 | 2 | 4 FALSE | TMEFF1   |
| 18188 | 3.20553  | 0.000196 | 0.311961 | 0 | 2 | 4 FALSE | TMEM189- |
| 18192 | 3.20553  | 0.000196 | 0.311961 | 0 | 2 | 4 FALSE | TMEM9B   |
| 18196 | 3.20553  | 0.000196 | 0.311961 | 0 | 2 | 4 FALSE | TMOD3    |
| 18217 | 3.20553  | 0.000196 | 0.311961 | 0 | 2 | 4 FALSE | TRIM28   |
| 18223 | 3.517419 | 0.000166 | 0.284299 | 0 | 2 | 4 FALSE | TSPAN6   |
| 18232 | 3.71871  | 0.000128 | 0.26891  | 0 | 2 | 4 FALSE | UBE2W    |
| 18234 | 3.20553  | 0.000196 | 0.311961 | 0 | 2 | 4 FALSE | UBE4A    |
| 18271 | 3.20553  | 0.000196 | 0.311961 | 0 | 2 | 4 FALSE | ZBTB25   |
| 18280 | 3.20553  | 0.000196 | 0.311961 | 0 | 2 | 4 FALSE | ZDHC6    |
| 18286 | 3.20553  | 0.000196 | 0.311961 | 0 | 2 | 4 FALSE | ZFYVE9   |
| 18288 | 3.597051 | 0.00014  | 0.278006 | 0 | 2 | 4 FALSE | ZMYM4    |
| 18291 | 3.20553  | 0.000196 | 0.311961 | 0 | 2 | 4 FALSE | ZNF180   |
| 18293 | 3.20553  | 0.000196 | 0.311961 | 0 | 2 | 4 FALSE | ZNF267   |
| 18308 | 3.20553  | 0.000196 | 0.311961 | 0 | 2 | 4 FALSE | ZRANB1   |
| 18319 | 3.727926 | 2.1E-06  | 0.268246 | 0 | 2 | 4 FALSE | ACBD3    |
| 18321 | 3.727926 | 2.1E-06  | 0.268246 | 0 | 2 | 4 FALSE | ACO1     |
| 18323 | 3.727926 | 2.1E-06  | 0.268246 | 0 | 2 | 4 FALSE | ACTBL2   |
| 18327 | 3.727926 | 2.1E-06  | 0.268246 | 0 | 2 | 4 FALSE | ACTN1    |
| 18349 | 3.727926 | 2.1E-06  | 0.268246 | 0 | 2 | 4 FALSE | ANXA7    |
| 18351 | 3.727926 | 2.1E-06  | 0.268246 | 0 | 2 | 4 FALSE | AP1G2    |
| 18355 | 3.727926 | 2.1E-06  | 0.268246 | 0 | 2 | 4 FALSE | APMAP    |
| 18357 | 3.727926 | 2.1E-06  | 0.268246 | 0 | 2 | 4 FALSE | ARF3     |
| 18359 | 3.727926 | 2.1E-06  | 0.268246 | 0 | 2 | 4 FALSE | ARGLU1   |
| 18364 | 3.727926 | 2.1E-06  | 0.268246 | 0 | 2 | 4 FALSE | ATF6     |
| 18368 | 3.727926 | 2.1E-06  | 0.268246 | 0 | 2 | 4 FALSE | ATP11AUN |
| 18376 | 3.612903 | 0.000102 | 0.276786 | 0 | 2 | 4 FALSE | ATP6V1H  |
| 18382 | 3.727926 | 2.1E-06  | 0.268246 | 0 | 2 | 4 FALSE | BABAM1   |
| 18385 | 3.727926 | 2.1E-06  | 0.268246 | 0 | 2 | 4 FALSE | BAG6     |
| 18387 | 3.727926 | 2.1E-06  | 0.268246 | 0 | 2 | 4 FALSE | BAIAP2   |
| 18391 | 3.727926 | 2.1E-06  | 0.268246 | 0 | 2 | 4 FALSE | BCHE     |
| 18397 | 3.727926 | 2.1E-06  | 0.268246 | 0 | 2 | 4 FALSE | BCLAF1   |
| 18431 | 3.727926 | 2.1E-06  | 0.268246 | 0 | 2 | 4 FALSE | CARD10   |
| 18435 | 3.727926 | 2.1E-06  | 0.268246 | 0 | 2 | 4 FALSE | CARHSP1  |
| 18437 | 3.727926 | 2.1E-06  | 0.268246 | 0 | 2 | 4 FALSE | CASK     |
| 18444 | 3.727926 | 2.1E-06  | 0.268246 | 0 | 2 | 4 FALSE | CCDC83   |
| 18448 | 3.226175 | 0.000117 | 0.309965 | 0 | 2 | 4 FALSE | CCNA2    |
| 18456 | 3.727926 | 2.1E-06  | 0.268246 | 0 | 2 | 4 FALSE | CD300LB  |
| 18467 | 3.727926 | 2.1E-06  | 0.268246 | 0 | 2 | 4 FALSE | CDC25A   |
| 18476 | 3.727926 | 2.1E-06  | 0.268246 | 0 | 2 | 4 FALSE | CECR2    |
| 18478 | 3.226175 | 0.000117 | 0.309965 | 0 | 2 | 4 FALSE | CFH      |
| 18488 | 3.727926 | 2.1E-06  | 0.268246 | 0 | 2 | 4 FALSE | CNNM3    |
| 18498 | 3.727926 | 2.1E-06  | 0.268246 | 0 | 2 | 4 FALSE | CPNE1    |

|       |          |          |          |   |   |         |          |
|-------|----------|----------|----------|---|---|---------|----------|
| 18511 | 3.727926 | 2.1E-06  | 0.268246 | 0 | 2 | 4 FALSE | CYTIP    |
| 18514 | 3.727926 | 2.1E-06  | 0.268246 | 0 | 2 | 4 FALSE | DBF4B    |
| 18516 | 3.727926 | 2.1E-06  | 0.268246 | 0 | 2 | 4 FALSE | DCAF16   |
| 18523 | 3.727926 | 2.1E-06  | 0.268246 | 0 | 2 | 4 FALSE | DDX60    |
| 18525 | 3.727926 | 2.1E-06  | 0.268246 | 0 | 2 | 4 FALSE | DECR1    |
| 18527 | 3.727926 | 2.1E-06  | 0.268246 | 0 | 2 | 4 FALSE | DEDD     |
| 18529 | 3.727926 | 2.1E-06  | 0.268246 | 0 | 2 | 4 FALSE | DGCR6L   |
| 18531 | 3.727926 | 2.1E-06  | 0.268246 | 0 | 2 | 4 FALSE | DHRS1    |
| 18535 | 3.727926 | 2.1E-06  | 0.268246 | 0 | 2 | 4 FALSE | DHX8     |
| 18543 | 3.727926 | 2.1E-06  | 0.268246 | 0 | 2 | 4 FALSE | DNPH1    |
| 18550 | 3.727926 | 2.1E-06  | 0.268246 | 0 | 2 | 4 FALSE | EFNA5    |
| 18559 | 3.727926 | 2.1E-06  | 0.268246 | 0 | 2 | 4 FALSE | ELMSAN1  |
| 18562 | 3.727926 | 2.1E-06  | 0.268246 | 0 | 2 | 4 FALSE | EML1     |
| 18566 | 3.727926 | 2.1E-06  | 0.268246 | 0 | 2 | 4 FALSE | ENTPD5   |
| 18568 | 3.727926 | 2.1E-06  | 0.268246 | 0 | 2 | 4 FALSE | EPB41L4A |
| 18574 | 3.727926 | 2.1E-06  | 0.268246 | 0 | 2 | 4 FALSE | ESD      |
| 18576 | 3.727926 | 2.1E-06  | 0.268246 | 0 | 2 | 4 FALSE | ETAA1    |
| 18584 | 3.727926 | 2.1E-06  | 0.268246 | 0 | 2 | 4 FALSE | FAM111A  |
| 18587 | 3.727926 | 2.1E-06  | 0.268246 | 0 | 2 | 4 FALSE | FANCF    |
| 18596 | 3.727926 | 2.1E-06  | 0.268246 | 0 | 2 | 4 FALSE | FBXO3    |
| 18601 | 3.727926 | 2.1E-06  | 0.268246 | 0 | 2 | 4 FALSE | FNBP4    |
| 18613 | 3.727926 | 2.1E-06  | 0.268246 | 0 | 2 | 4 FALSE | GLTP     |
| 18617 | 3.727926 | 2.1E-06  | 0.268246 | 0 | 2 | 4 FALSE | GOPC     |
| 18619 | 3.727926 | 2.1E-06  | 0.268246 | 0 | 2 | 4 FALSE | GPANK1   |
| 18621 | 3.727926 | 2.1E-06  | 0.268246 | 0 | 2 | 4 FALSE | GPM6B    |
| 18625 | 3.727926 | 2.1E-06  | 0.268246 | 0 | 2 | 4 FALSE | GRAP2    |
| 18627 | 3.727926 | 2.1E-06  | 0.268246 | 0 | 2 | 4 FALSE | GRPEL1   |
| 18630 | 3.727926 | 2.1E-06  | 0.268246 | 0 | 2 | 4 FALSE | GTPBP3   |
| 18635 | 3.727926 | 2.1E-06  | 0.268246 | 0 | 2 | 4 FALSE | HAS2     |
| 18643 | 3.727926 | 2.1E-06  | 0.268246 | 0 | 2 | 4 FALSE | HIST1H4B |
| 18645 | 3.727926 | 2.1E-06  | 0.268246 | 0 | 2 | 4 FALSE | HLA-C    |
| 18647 | 3.727926 | 2.1E-06  | 0.268246 | 0 | 2 | 4 FALSE | HLA-DPA1 |
| 18652 | 3.727926 | 2.1E-06  | 0.268246 | 0 | 2 | 4 FALSE | HNRNPA3  |
| 18657 | 3.727926 | 2.1E-06  | 0.268246 | 0 | 2 | 4 FALSE | HORMAD2  |
| 18659 | 3.727926 | 2.1E-06  | 0.268246 | 0 | 2 | 4 FALSE | HOXB8    |
| 18670 | 3.226175 | 0.000117 | 0.309965 | 0 | 2 | 4 FALSE | IER5L    |
| 18678 | 3.534009 | 0.000113 | 0.282965 | 0 | 2 | 4 FALSE | IFIT1    |
| 18685 | 3.534009 | 0.000113 | 0.282965 | 0 | 2 | 4 FALSE | IFITM2   |
| 18694 | 3.727926 | 2.1E-06  | 0.268246 | 0 | 2 | 4 FALSE | IL1RL2   |
| 18696 | 3.727926 | 2.1E-06  | 0.268246 | 0 | 2 | 4 FALSE | IL6      |
| 18700 | 3.727926 | 2.1E-06  | 0.268246 | 0 | 2 | 4 FALSE | INTU     |
| 18702 | 3.727926 | 2.1E-06  | 0.268246 | 0 | 2 | 4 FALSE | IQCE     |
| 18704 | 3.727926 | 2.1E-06  | 0.268246 | 0 | 2 | 4 FALSE | IRAK1    |
| 18717 | 3.727926 | 2.1E-06  | 0.268246 | 0 | 2 | 4 FALSE | ITCH     |
| 18721 | 3.736037 | 0.000115 | 0.267663 | 0 | 2 | 4 FALSE | ITGBL1   |
| 18724 | 3.727926 | 2.1E-06  | 0.268246 | 0 | 2 | 4 FALSE | JADE2    |
| 18729 | 3.727926 | 2.1E-06  | 0.268246 | 0 | 2 | 4 FALSE | KCTD15   |

|       |          |          |          |   |   |         |          |
|-------|----------|----------|----------|---|---|---------|----------|
| 18735 | 3.727926 | 2.1E-06  | 0.268246 | 0 | 2 | 4 FALSE | KIAA0040 |
| 18737 | 3.727926 | 2.1E-06  | 0.268246 | 0 | 2 | 4 FALSE | KIAA1524 |
| 18742 | 3.727926 | 2.1E-06  | 0.268246 | 0 | 2 | 4 FALSE | KLF9     |
| 18751 | 3.727926 | 2.1E-06  | 0.268246 | 0 | 2 | 4 FALSE | KSR1     |
| 18761 | 3.727926 | 2.1E-06  | 0.268246 | 0 | 2 | 4 FALSE | LFNG     |
| 18777 | 3.727926 | 2.1E-06  | 0.268246 | 0 | 2 | 4 FALSE | LRRC8D   |
| 18782 | 3.727926 | 2.1E-06  | 0.268246 | 0 | 2 | 4 FALSE | LTB4R2   |
| 18784 | 3.226175 | 0.000117 | 0.309965 | 0 | 2 | 4 FALSE | LY75     |
| 18788 | 3.727926 | 2.1E-06  | 0.268246 | 0 | 2 | 4 FALSE | MAN1C1   |
| 18795 | 3.727926 | 2.1E-06  | 0.268246 | 0 | 2 | 4 FALSE | MBOAT1   |
| 18800 | 3.727926 | 2.1E-06  | 0.268246 | 0 | 2 | 4 FALSE | MDN1     |
| 18802 | 3.727926 | 2.1E-06  | 0.268246 | 0 | 2 | 4 FALSE | MEA1     |
| 18805 | 3.727926 | 2.1E-06  | 0.268246 | 0 | 2 | 4 FALSE | METRNL   |
| 18807 | 3.727926 | 2.1E-06  | 0.268246 | 0 | 2 | 4 FALSE | METTL7A  |
| 18818 | 3.727926 | 2.1E-06  | 0.268246 | 0 | 2 | 4 FALSE | MKRN2    |
| 18822 | 3.727926 | 2.1E-06  | 0.268246 | 0 | 2 | 4 FALSE | MPP2     |
| 18824 | 3.727926 | 2.1E-06  | 0.268246 | 0 | 2 | 4 FALSE | MR1      |
| 18826 | 3.727926 | 2.1E-06  | 0.268246 | 0 | 2 | 4 FALSE | MRPL10   |
| 18828 | 3.727926 | 2.1E-06  | 0.268246 | 0 | 2 | 4 FALSE | MRPS30   |
| 18832 | 3.612903 | 0.000102 | 0.276786 | 0 | 2 | 4 FALSE | MTA2     |
| 18841 | 3.727926 | 2.1E-06  | 0.268246 | 0 | 2 | 4 FALSE | MYL12B   |
| 18843 | 3.727926 | 2.1E-06  | 0.268246 | 0 | 2 | 4 FALSE | MYLK     |
| 18849 | 3.727926 | 2.1E-06  | 0.268246 | 0 | 2 | 4 FALSE | NAPG     |
| 18863 | 3.727926 | 2.1E-06  | 0.268246 | 0 | 2 | 4 FALSE | NFKB1    |
| 18865 | 3.727926 | 2.1E-06  | 0.268246 | 0 | 2 | 4 FALSE | NLGN1    |
| 18870 | 3.534009 | 0.000113 | 0.282965 | 0 | 2 | 4 FALSE | NOTCH2   |
| 18872 | 3.727926 | 2.1E-06  | 0.268246 | 0 | 2 | 4 FALSE | NR6A1    |
| 18889 | 3.727926 | 2.1E-06  | 0.268246 | 0 | 2 | 4 FALSE | OGFOD1   |
| 18898 | 3.727926 | 2.1E-06  | 0.268246 | 0 | 2 | 4 FALSE | P2RX5    |
| 18903 | 3.727926 | 2.1E-06  | 0.268246 | 0 | 2 | 4 FALSE | PACS2    |
| 18905 | 3.727926 | 2.1E-06  | 0.268246 | 0 | 2 | 4 FALSE | PAFAH2   |
| 18912 | 3.727926 | 2.1E-06  | 0.268246 | 0 | 2 | 4 FALSE | PCDHGB6  |
| 18914 | 3.727926 | 2.1E-06  | 0.268246 | 0 | 2 | 4 FALSE | PCMTD2   |
| 18919 | 3.226175 | 0.000117 | 0.309965 | 0 | 2 | 4 FALSE | PELI1    |
| 18921 | 3.727926 | 2.1E-06  | 0.268246 | 0 | 2 | 4 FALSE | PHB2     |
| 18923 | 3.727926 | 2.1E-06  | 0.268246 | 0 | 2 | 4 FALSE | PHF20L1  |
| 18925 | 3.727926 | 2.1E-06  | 0.268246 | 0 | 2 | 4 FALSE | PHF23    |
| 18928 | 3.727926 | 2.1E-06  | 0.268246 | 0 | 2 | 4 FALSE | PIGB     |
| 18930 | 3.727926 | 2.1E-06  | 0.268246 | 0 | 2 | 4 FALSE | PLA1A    |
| 18938 | 3.727926 | 2.1E-06  | 0.268246 | 0 | 2 | 4 FALSE | PLIN2    |
| 18940 | 3.727926 | 2.1E-06  | 0.268246 | 0 | 2 | 4 FALSE | PMAIP1   |
| 18946 | 3.727926 | 2.1E-06  | 0.268246 | 0 | 2 | 4 FALSE | PPHLN1   |
| 18954 | 3.727926 | 2.1E-06  | 0.268246 | 0 | 2 | 4 FALSE | PPRC1    |
| 18956 | 3.727926 | 2.1E-06  | 0.268246 | 0 | 2 | 4 FALSE | PPWD1    |
| 18960 | 3.727926 | 2.1E-06  | 0.268246 | 0 | 2 | 4 FALSE | PRKDC    |
| 18963 | 3.727926 | 2.1E-06  | 0.268246 | 0 | 2 | 4 FALSE | PRRC2A   |
| 18972 | 3.727926 | 2.1E-06  | 0.268246 | 0 | 2 | 4 FALSE | PTMS     |

|       |          |          |          |   |   |         |           |
|-------|----------|----------|----------|---|---|---------|-----------|
| 18978 | 3.727926 | 2.1E-06  | 0.268246 | 0 | 2 | 4 FALSE | RAB20     |
| 18985 | 3.727926 | 2.1E-06  | 0.268246 | 0 | 2 | 4 FALSE | RAD54L2   |
| 18987 | 3.727926 | 2.1E-06  | 0.268246 | 0 | 2 | 4 FALSE | RAD9A     |
| 18991 | 3.727926 | 2.1E-06  | 0.268246 | 0 | 2 | 4 FALSE | RAPGEF5   |
| 18994 | 3.727926 | 2.1E-06  | 0.268246 | 0 | 2 | 4 FALSE | RARB      |
| 18997 | 3.727926 | 2.1E-06  | 0.268246 | 0 | 2 | 4 FALSE | RBL1      |
| 19004 | 3.727926 | 2.1E-06  | 0.268246 | 0 | 2 | 4 FALSE | RFX5      |
| 19015 | 3.727926 | 2.1E-06  | 0.268246 | 0 | 2 | 4 FALSE | RHOBTB3   |
| 19019 | 3.727926 | 2.1E-06  | 0.268246 | 0 | 2 | 4 FALSE | RNASET2   |
| 19026 | 3.727926 | 2.1E-06  | 0.268246 | 0 | 2 | 4 FALSE | RP11-111M |
| 19028 | 3.727926 | 2.1E-06  | 0.268246 | 0 | 2 | 4 FALSE | RPL11     |
| 19032 | 3.727926 | 2.1E-06  | 0.268246 | 0 | 2 | 4 FALSE | RPS6      |
| 19036 | 3.727926 | 2.1E-06  | 0.268246 | 0 | 2 | 4 FALSE | RUFY2     |
| 19038 | 3.727926 | 2.1E-06  | 0.268246 | 0 | 2 | 4 FALSE | S100A12   |
| 19042 | 3.727926 | 2.1E-06  | 0.268246 | 0 | 2 | 4 FALSE | SCAF8     |
| 19044 | 3.727926 | 2.1E-06  | 0.268246 | 0 | 2 | 4 FALSE | SCARF2    |
| 19050 | 3.727926 | 2.1E-06  | 0.268246 | 0 | 2 | 4 FALSE | SERPINA4  |
| 19056 | 3.727926 | 2.1E-06  | 0.268246 | 0 | 2 | 4 FALSE | SESTD1    |
| 19060 | 3.727926 | 2.1E-06  | 0.268246 | 0 | 2 | 4 FALSE | SFRP1     |
| 19066 | 3.727926 | 2.1E-06  | 0.268246 | 0 | 2 | 4 FALSE | SKA2      |
| 19068 | 3.727926 | 2.1E-06  | 0.268246 | 0 | 2 | 4 FALSE | SLC10A3   |
| 19070 | 3.727926 | 2.1E-06  | 0.268246 | 0 | 2 | 4 FALSE | SLC16A3   |
| 19072 | 3.727926 | 2.1E-06  | 0.268246 | 0 | 2 | 4 FALSE | SLC17A5   |
| 19075 | 3.727926 | 2.1E-06  | 0.268246 | 0 | 2 | 4 FALSE | SLC22A15  |
| 19079 | 3.727926 | 2.1E-06  | 0.268246 | 0 | 2 | 4 FALSE | SLC2A12   |
| 19081 | 3.727926 | 2.1E-06  | 0.268246 | 0 | 2 | 4 FALSE | SLC2A3    |
| 19084 | 3.727926 | 2.1E-06  | 0.268246 | 0 | 2 | 4 FALSE | SLC4A1AP  |
| 19086 | 3.727926 | 2.1E-06  | 0.268246 | 0 | 2 | 4 FALSE | SLC50A1   |
| 19090 | 3.727926 | 2.1E-06  | 0.268246 | 0 | 2 | 4 FALSE | SLK       |
| 19096 | 3.727926 | 2.1E-06  | 0.268246 | 0 | 2 | 4 FALSE | SMARCAD1  |
| 19103 | 3.226175 | 0.000117 | 0.309965 | 0 | 2 | 4 FALSE | SOS1      |
| 19108 | 3.684055 | 0.000169 | 0.27144  | 0 | 2 | 4 FALSE | SPATS2L   |
| 19114 | 3.727926 | 2.1E-06  | 0.268246 | 0 | 2 | 4 FALSE | SREK1     |
| 19116 | 3.727926 | 2.1E-06  | 0.268246 | 0 | 2 | 4 FALSE | SRPK1     |
| 19118 | 3.727926 | 2.1E-06  | 0.268246 | 0 | 2 | 4 FALSE | SRPRB     |
| 19122 | 3.727926 | 2.1E-06  | 0.268246 | 0 | 2 | 4 FALSE | ST6GAL2   |
| 19131 | 3.727926 | 2.1E-06  | 0.268246 | 0 | 2 | 4 FALSE | STIM1     |
| 19133 | 3.727926 | 2.1E-06  | 0.268246 | 0 | 2 | 4 FALSE | STK40     |
| 19135 | 3.727926 | 2.1E-06  | 0.268246 | 0 | 2 | 4 FALSE | STMN3     |
| 19140 | 3.727926 | 2.1E-06  | 0.268246 | 0 | 2 | 4 FALSE | STXBP2    |
| 19142 | 3.727926 | 2.1E-06  | 0.268246 | 0 | 2 | 4 FALSE | SUPT16H   |
| 19144 | 3.727926 | 2.1E-06  | 0.268246 | 0 | 2 | 4 FALSE | SYNJ1     |
| 19157 | 3.727926 | 2.1E-06  | 0.268246 | 0 | 2 | 4 FALSE | THAP5     |
| 19161 | 3.727926 | 2.1E-06  | 0.268246 | 0 | 2 | 4 FALSE | TLL1      |
| 19164 | 3.727926 | 2.1E-06  | 0.268246 | 0 | 2 | 4 FALSE | TLR4      |
| 19168 | 3.727926 | 2.1E-06  | 0.268246 | 0 | 2 | 4 FALSE | TMEM136   |
| 19174 | 3.727926 | 2.1E-06  | 0.268246 | 0 | 2 | 4 FALSE | TMEM41B   |

|       |          |          |          |   |     |   |       |       |            |
|-------|----------|----------|----------|---|-----|---|-------|-------|------------|
| 19177 | 3.727926 | 2.1E-06  | 0.268246 | 0 | 2   | 4 | FALSE |       | TMPPE      |
| 19179 | 3.727926 | 2.1E-06  | 0.268246 | 0 | 2   | 4 | FALSE |       | TMPRSS5    |
| 19183 | 3.226175 | 0.000117 | 0.309965 | 0 | 2   | 4 | FALSE |       | TNF-??     |
| 19185 | 3.727926 | 2.1E-06  | 0.268246 | 0 | 2   | 4 | FALSE |       | TNFAIP8    |
| 19187 | 3.727926 | 2.1E-06  | 0.268246 | 0 | 2   | 4 | FALSE |       | TNIK       |
| 19191 | 3.727926 | 2.1E-06  | 0.268246 | 0 | 2   | 4 | FALSE |       | TOMM70A    |
| 19199 | 3.534009 | 0.000113 | 0.282965 | 0 | 2   | 4 | FALSE |       | TRAM1      |
| 19204 | 3.727926 | 2.1E-06  | 0.268246 | 0 | 2   | 4 | FALSE |       | TRMT112    |
| 19206 | 3.684055 | 0.000169 | 0.27144  | 0 | 2   | 4 | FALSE |       | TSPAN14    |
| 19214 | 3.727926 | 2.1E-06  | 0.268246 | 0 | 2   | 4 | FALSE |       | UHRF1      |
| 19218 | 3.727926 | 2.1E-06  | 0.268246 | 0 | 2   | 4 | FALSE |       | UMPS       |
| 19220 | 3.727926 | 2.1E-06  | 0.268246 | 0 | 2   | 4 | FALSE |       | USP48      |
| 19233 | 3.727926 | 2.1E-06  | 0.268246 | 0 | 2   | 4 | FALSE |       | WSB2       |
| 19236 | 3.727926 | 2.1E-06  | 0.268246 | 0 | 2   | 4 | FALSE |       | YTHDF2     |
| 19245 | 3.226175 | 0.000117 | 0.309965 | 0 | 2   | 4 | FALSE |       | ZDHHC12    |
| 19250 | 3.727926 | 2.1E-06  | 0.268246 | 0 | 2   | 4 | FALSE |       | ZHX1       |
| 19254 | 3.727926 | 2.1E-06  | 0.268246 | 0 | 2   | 4 | FALSE |       | ZNF175     |
| 19258 | 3.727926 | 2.1E-06  | 0.268246 | 0 | 2   | 4 | FALSE |       | ZNF257     |
| 19260 | 3.727926 | 2.1E-06  | 0.268246 | 0 | 2   | 4 | FALSE |       | ZNF26      |
| 19266 | 3.727926 | 2.1E-06  | 0.268246 | 0 | 2   | 4 | FALSE |       | ZNF410     |
| 19269 | 3.727926 | 2.1E-06  | 0.268246 | 0 | 2   | 4 | FALSE |       | ZNF493     |
| 19271 | 3.727926 | 2.1E-06  | 0.268246 | 0 | 2   | 4 | FALSE |       | ZNF597     |
| 19273 | 3.727926 | 2.1E-06  | 0.268246 | 0 | 2   | 4 | FALSE |       | ZNF620     |
| 19275 | 3.727926 | 2.1E-06  | 0.268246 | 0 | 2   | 4 | FALSE |       | ZNF629     |
| 19280 | 3.727926 | 2.1E-06  | 0.268246 | 0 | 2   | 4 | FALSE |       | ZNF768     |
| 15503 | 2.674654 | 0.18831  | 0.37388  | 0 | 874 | 3 | FALSE | miRNA | hsa-miR-14 |
| 19282 | 3.727926 | 2.1E-06  | 0.268246 | 0 | 2   | 4 | FALSE |       | ZNF823     |
| 19303 | 3.234654 | 9.93E-05 | 0.309152 | 0 | 2   | 4 | FALSE |       | AFF1       |
| 19329 | 3.617696 | 8.83E-05 | 0.276419 | 0 | 2   | 4 | FALSE |       | ATP1A1     |
| 19343 | 3.749309 | 6.56E-05 | 0.266716 | 0 | 2   | 4 | FALSE |       | BCAT2      |
| 19435 | 3.540277 | 9.66E-05 | 0.282464 | 0 | 2   | 4 | FALSE |       | DDX26B     |
| 19473 | 3.234654 | 9.93E-05 | 0.309152 | 0 | 2   | 4 | FALSE |       | FAM160A1   |
| 19500 | 3.234654 | 9.93E-05 | 0.309152 | 0 | 2   | 4 | FALSE |       | GINS1      |
| 19539 | 3.617696 | 8.83E-05 | 0.276419 | 0 | 2   | 4 | FALSE |       | HSPA1B     |
| 19562 | 3.234654 | 9.93E-05 | 0.309152 | 0 | 2   | 4 | FALSE |       | ITSN2      |
| 19577 | 3.234654 | 9.93E-05 | 0.309152 | 0 | 2   | 4 | FALSE |       | KIAA2018   |
| 19580 | 3.234654 | 9.93E-05 | 0.309152 | 0 | 2   | 4 | FALSE |       | KIT        |
| 19605 | 3.540277 | 9.66E-05 | 0.282464 | 0 | 2   | 4 | FALSE |       | LYPLA1     |
| 19684 | 3.234654 | 9.93E-05 | 0.309152 | 0 | 2   | 4 | FALSE |       | PBX1       |
| 19691 | 3.540277 | 9.66E-05 | 0.282464 | 0 | 2   | 4 | FALSE |       | PDK4       |
| 19695 | 3.540277 | 9.66E-05 | 0.282464 | 0 | 2   | 4 | FALSE |       | PEAK1      |
| 19705 | 3.234654 | 9.93E-05 | 0.309152 | 0 | 2   | 4 | FALSE |       | PHTF2      |
| 19820 | 3.234654 | 9.93E-05 | 0.309152 | 0 | 2   | 4 | FALSE |       | SOGA1      |
| 19822 | 3.234654 | 9.93E-05 | 0.309152 | 0 | 2   | 4 | FALSE |       | SORT1      |
| 19833 | 3.540277 | 9.66E-05 | 0.282464 | 0 | 2   | 4 | FALSE |       | SSR3       |
| 19951 | 3.234654 | 9.93E-05 | 0.309152 | 0 | 2   | 4 | FALSE |       | ZNRF3      |
| 19972 | 3.376221 | 9.92E-05 | 0.296189 | 0 | 2   | 4 | FALSE |       | ACACA      |

|       |          |          |          |   |   |         |          |
|-------|----------|----------|----------|---|---|---------|----------|
| 20001 | 3.183041 | 0.0002   | 0.314165 | 0 | 2 | 4 FALSE | AHDC1    |
| 20049 | 3.183041 | 0.0002   | 0.314165 | 0 | 2 | 4 FALSE | ARHGAP11 |
| 20054 | 3.251982 | 0.000173 | 0.307505 | 0 | 2 | 4 FALSE | ARHGAP22 |
| 20070 | 3.183041 | 0.0002   | 0.314165 | 0 | 2 | 4 FALSE | ARL6IP1  |
| 20075 | 3.183041 | 0.0002   | 0.314165 | 0 | 2 | 4 FALSE | ARMC8    |
| 20079 | 3.183041 | 0.0002   | 0.314165 | 0 | 2 | 4 FALSE | ARPC2    |
| 20085 | 3.374009 | 0.000371 | 0.296383 | 0 | 2 | 4 FALSE | ASB6     |
| 20089 | 3.183041 | 0.0002   | 0.314165 | 0 | 2 | 4 FALSE | ASCL2    |
| 20091 | 3.251982 | 0.000173 | 0.307505 | 0 | 2 | 4 FALSE | ASNA1    |
| 20101 | 3.360737 | 0.000147 | 0.297554 | 0 | 2 | 4 FALSE | ATG14    |
| 20111 | 3.183041 | 0.0002   | 0.314165 | 0 | 2 | 4 FALSE | ATL3     |
| 20118 | 3.183041 | 0.0002   | 0.314165 | 0 | 2 | 4 FALSE | ATP2A2   |
| 20174 | 3.183041 | 0.0002   | 0.314165 | 0 | 2 | 4 FALSE | BLCAP    |
| 20221 | 3.183041 | 0.0002   | 0.314165 | 0 | 2 | 4 FALSE | C19orf48 |
| 20227 | 3.251982 | 0.000173 | 0.307505 | 0 | 2 | 4 FALSE | C22orf29 |
| 20256 | 3.183041 | 0.0002   | 0.314165 | 0 | 2 | 4 FALSE | C7orf60  |
| 20278 | 3.323134 | 0.000199 | 0.300921 | 0 | 2 | 4 FALSE | CAPZA1   |
| 20289 | 3.183041 | 0.0002   | 0.314165 | 0 | 2 | 4 FALSE | CBX7     |
| 20301 | 3.251982 | 0.000173 | 0.307505 | 0 | 2 | 4 FALSE | CCDC137  |
| 20314 | 3.251982 | 0.000173 | 0.307505 | 0 | 2 | 4 FALSE | CCNE2    |
| 20366 | 3.323134 | 0.000199 | 0.300921 | 0 | 2 | 4 FALSE | CHAC1    |
| 20371 | 3.317972 | 0.000174 | 0.301389 | 0 | 2 | 4 FALSE | CHD9     |
| 20392 | 3.360737 | 0.000147 | 0.297554 | 0 | 2 | 4 FALSE | CLIP4    |
| 20394 | 3.251982 | 0.000173 | 0.307505 | 0 | 2 | 4 FALSE | CLN6     |
| 20445 | 3.364055 | 0.000163 | 0.29726  | 0 | 2 | 4 FALSE | CRIM1    |
| 20453 | 3.317972 | 0.000174 | 0.301389 | 0 | 2 | 4 FALSE | CSNK1G1  |
| 20455 | 3.364055 | 0.000163 | 0.29726  | 0 | 2 | 4 FALSE | CSNK2A1  |
| 20478 | 3.183041 | 0.0002   | 0.314165 | 0 | 2 | 4 FALSE | CYR61    |
| 20511 | 3.183041 | 0.0002   | 0.314165 | 0 | 2 | 4 FALSE | DDX39B   |
| 20550 | 3.251982 | 0.000173 | 0.307505 | 0 | 2 | 4 FALSE | DIXDC1   |
| 20561 | 3.183041 | 0.0002   | 0.314165 | 0 | 2 | 4 FALSE | DNAJB14  |
| 20565 | 3.183041 | 0.0002   | 0.314165 | 0 | 2 | 4 FALSE | DNMT1    |
| 20585 | 3.251982 | 0.000173 | 0.307505 | 0 | 2 | 4 FALSE | DTL      |
| 20599 | 3.183041 | 0.0002   | 0.314165 | 0 | 2 | 4 FALSE | DYRK1A   |
| 20605 | 3.183041 | 0.0002   | 0.314165 | 0 | 2 | 4 FALSE | EAF1     |
| 20622 | 3.360737 | 0.000147 | 0.297554 | 0 | 2 | 4 FALSE | EIF2A    |
| 20637 | 3.317972 | 0.000174 | 0.301389 | 0 | 2 | 4 FALSE | ELMOD2   |
| 20641 | 3.183041 | 0.0002   | 0.314165 | 0 | 2 | 4 FALSE | EMC10    |
| 20651 | 3.183041 | 0.0002   | 0.314165 | 0 | 2 | 4 FALSE | ENTPD4   |
| 20679 | 3.364055 | 0.000163 | 0.29726  | 0 | 2 | 4 FALSE | ESRP1    |
| 20683 | 3.317972 | 0.000174 | 0.301389 | 0 | 2 | 4 FALSE | ESYT1    |
| 20687 | 3.251982 | 0.000173 | 0.307505 | 0 | 2 | 4 FALSE | EVI5L    |
| 20762 | 3.302488 | 0.000345 | 0.302802 | 0 | 2 | 4 FALSE | FBXW2    |
| 20768 | 3.183041 | 0.0002   | 0.314165 | 0 | 2 | 4 FALSE | FEM1B    |
| 20778 | 3.251982 | 0.000173 | 0.307505 | 0 | 2 | 4 FALSE | FGFRL1   |
| 20786 | 3.317972 | 0.000174 | 0.301389 | 0 | 2 | 4 FALSE | FLCN     |
| 20799 | 3.183041 | 0.0002   | 0.314165 | 0 | 2 | 4 FALSE | FOXO3    |



|       |          |          |          |   |   |         |         |
|-------|----------|----------|----------|---|---|---------|---------|
| 20801 | 3.183041 | 0.0002   | 0.314165 | 0 | 2 | 4 FALSE | FOXP1   |
| 20803 | 3.183041 | 0.0002   | 0.314165 | 0 | 2 | 4 FALSE | FOXP2   |
| 20874 | 3.183041 | 0.0002   | 0.314165 | 0 | 2 | 4 FALSE | GPR137B |
| 20878 | 3.360737 | 0.000147 | 0.297554 | 0 | 2 | 4 FALSE | GRB10   |
| 20891 | 3.183041 | 0.0002   | 0.314165 | 0 | 2 | 4 FALSE | GSKIP   |
| 20907 | 3.251982 | 0.000173 | 0.307505 | 0 | 2 | 4 FALSE | HCFC1   |
| 20951 | 3.323134 | 0.000199 | 0.300921 | 0 | 2 | 4 FALSE | HS2ST1  |
| 20959 | 3.323134 | 0.000199 | 0.300921 | 0 | 2 | 4 FALSE | IDH1    |
| 20973 | 3.317972 | 0.000174 | 0.301389 | 0 | 2 | 4 FALSE | IKZF1   |
| 20975 | 3.183041 | 0.0002   | 0.314165 | 0 | 2 | 4 FALSE | IL10    |
| 21004 | 3.183041 | 0.0002   | 0.314165 | 0 | 2 | 4 FALSE | IPO8    |
| 21006 | 3.352258 | 0.000211 | 0.298306 | 0 | 2 | 4 FALSE | IPPK    |
| 21024 | 3.251982 | 0.000173 | 0.307505 | 0 | 2 | 4 FALSE | ITPR1   |
| 21077 | 3.251982 | 0.000173 | 0.307505 | 0 | 2 | 4 FALSE | KIF2A   |
| 21080 | 3.360737 | 0.000147 | 0.297554 | 0 | 2 | 4 FALSE | KIFAP3  |
| 21087 | 3.302488 | 0.000345 | 0.302802 | 0 | 2 | 4 FALSE | KLF13   |
| 21142 | 3.352258 | 0.000211 | 0.298306 | 0 | 2 | 4 FALSE | LRIG3   |
| 21161 | 3.251982 | 0.000173 | 0.307505 | 0 | 2 | 4 FALSE | LZTFL1  |
| 21175 | 3.251982 | 0.000173 | 0.307505 | 0 | 2 | 4 FALSE | MAP4    |
| 21193 | 3.251982 | 0.000173 | 0.307505 | 0 | 2 | 4 FALSE | MAZ     |
| 21207 | 3.183041 | 0.0002   | 0.314165 | 0 | 2 | 4 FALSE | MBOAT7  |
| 21220 | 3.323134 | 0.000199 | 0.300921 | 0 | 2 | 4 FALSE | MECP2   |
| 21245 | 3.183041 | 0.0002   | 0.314165 | 0 | 2 | 4 FALSE | MGEA5   |
| 21274 | 3.302488 | 0.000345 | 0.302802 | 0 | 2 | 4 FALSE | MOCS3   |
| 21298 | 3.302488 | 0.000345 | 0.302802 | 0 | 2 | 4 FALSE | MTPAP   |
| 21317 | 3.352258 | 0.000211 | 0.298306 | 0 | 2 | 4 FALSE | MYLIP   |
| 21340 | 3.323134 | 0.000199 | 0.300921 | 0 | 2 | 4 FALSE | NCOA1   |
| 21347 | 3.302488 | 0.000345 | 0.302802 | 0 | 2 | 4 FALSE | NCOR2   |
| 21372 | 3.317972 | 0.000174 | 0.301389 | 0 | 2 | 4 FALSE | NIPA1   |
| 21399 | 3.352258 | 0.000211 | 0.298306 | 0 | 2 | 4 FALSE | NRBF2   |
| 21415 | 3.251982 | 0.000173 | 0.307505 | 0 | 2 | 4 FALSE | NUP188  |
| 21418 | 3.183041 | 0.0002   | 0.314165 | 0 | 2 | 4 FALSE | NUP50   |
| 21473 | 3.302488 | 0.000345 | 0.302802 | 0 | 2 | 4 FALSE | PDE7A   |
| 21499 | 3.323134 | 0.000199 | 0.300921 | 0 | 2 | 4 FALSE | PGM2L1  |
| 21560 | 3.183041 | 0.0002   | 0.314165 | 0 | 2 | 4 FALSE | POLG    |
| 21562 | 3.360737 | 0.000147 | 0.297554 | 0 | 2 | 4 FALSE | POLI    |
| 21566 | 3.352258 | 0.000211 | 0.298306 | 0 | 2 | 4 FALSE | POLR2B  |
| 21587 | 3.183041 | 0.0002   | 0.314165 | 0 | 2 | 4 FALSE | PPP2CA  |
| 21619 | 3.360737 | 0.000147 | 0.297554 | 0 | 2 | 4 FALSE | PRKX    |
| 21647 | 3.323134 | 0.000199 | 0.300921 | 0 | 2 | 4 FALSE | PTCD2   |
| 21670 | 3.183041 | 0.0002   | 0.314165 | 0 | 2 | 4 FALSE | QTRTD1  |
| 21683 | 3.251982 | 0.000173 | 0.307505 | 0 | 2 | 4 FALSE | RAB34   |
| 21699 | 3.364055 | 0.000163 | 0.29726  | 0 | 2 | 4 FALSE | RAP1A   |
| 21717 | 3.302488 | 0.000345 | 0.302802 | 0 | 2 | 4 FALSE | RBBP8   |
| 21719 | 3.251982 | 0.000173 | 0.307505 | 0 | 2 | 4 FALSE | RBCK1   |
| 21721 | 3.251982 | 0.000173 | 0.307505 | 0 | 2 | 4 FALSE | RBM14   |
| 21726 | 3.323134 | 0.000199 | 0.300921 | 0 | 2 | 4 FALSE | RBM38   |

|       |          |          |          |   |   |         |          |
|-------|----------|----------|----------|---|---|---------|----------|
| 21769 | 3.183041 | 0.0002   | 0.314165 | 0 | 2 | 4 FALSE | RNF38    |
| 21776 | 3.364055 | 0.000163 | 0.29726  | 0 | 2 | 4 FALSE | RNMT     |
| 21779 | 3.360737 | 0.000147 | 0.297554 | 0 | 2 | 4 FALSE | RORB     |
| 21802 | 3.251982 | 0.000173 | 0.307505 | 0 | 2 | 4 FALSE | RRAGD    |
| 21807 | 3.183041 | 0.0002   | 0.314165 | 0 | 2 | 4 FALSE | RSPRY1   |
| 21810 | 3.251982 | 0.000173 | 0.307505 | 0 | 2 | 4 FALSE | RUNX2    |
| 21812 | 3.183041 | 0.0002   | 0.314165 | 0 | 2 | 4 FALSE | RYBP     |
| 21828 | 3.251982 | 0.000173 | 0.307505 | 0 | 2 | 4 FALSE | SAR1A    |
| 21841 | 3.352258 | 0.000211 | 0.298306 | 0 | 2 | 4 FALSE | SCML1    |
| 21852 | 3.183041 | 0.0002   | 0.314165 | 0 | 2 | 4 FALSE | SEC24C   |
| 21914 | 3.251982 | 0.000173 | 0.307505 | 0 | 2 | 4 FALSE | SLC2A13  |
| 21971 | 3.323134 | 0.000199 | 0.300921 | 0 | 2 | 4 FALSE | SMYD2    |
| 21976 | 3.251982 | 0.000173 | 0.307505 | 0 | 2 | 4 FALSE | SNX17    |
| 22007 | 3.183041 | 0.0002   | 0.314165 | 0 | 2 | 4 FALSE | SPHK2    |
| 22009 | 3.323134 | 0.000199 | 0.300921 | 0 | 2 | 4 FALSE | SPOPL    |
| 22013 | 3.323134 | 0.000199 | 0.300921 | 0 | 2 | 4 FALSE | SPRYD3   |
| 22016 | 3.251982 | 0.000173 | 0.307505 | 0 | 2 | 4 FALSE | SPTSSA   |
| 22030 | 3.183041 | 0.0002   | 0.314165 | 0 | 2 | 4 FALSE | SSR1     |
| 22040 | 3.251982 | 0.000173 | 0.307505 | 0 | 2 | 4 FALSE | STEAP3   |
| 22044 | 3.183041 | 0.0002   | 0.314165 | 0 | 2 | 4 FALSE | STK35    |
| 22063 | 3.183041 | 0.0002   | 0.314165 | 0 | 2 | 4 FALSE | SV2A     |
| 22094 | 3.183041 | 0.0002   | 0.314165 | 0 | 2 | 4 FALSE | TBRG1    |
| 22112 | 3.183041 | 0.0002   | 0.314165 | 0 | 2 | 4 FALSE | TIA1     |
| 22137 | 3.251982 | 0.000173 | 0.307505 | 0 | 2 | 4 FALSE | TMEM127  |
| 22198 | 3.323134 | 0.000199 | 0.300921 | 0 | 2 | 4 FALSE | TP53     |
| 22212 | 3.183041 | 0.0002   | 0.314165 | 0 | 2 | 4 FALSE | TRIM2    |
| 22251 | 3.251982 | 0.000173 | 0.307505 | 0 | 2 | 4 FALSE | UBA52    |
| 22261 | 3.251982 | 0.000173 | 0.307505 | 0 | 2 | 4 FALSE | UBE2Q1   |
| 22269 | 3.360737 | 0.000147 | 0.297554 | 0 | 2 | 4 FALSE | UBFD1    |
| 22271 | 3.183041 | 0.0002   | 0.314165 | 0 | 2 | 4 FALSE | UBL3     |
| 22275 | 3.317972 | 0.000174 | 0.301389 | 0 | 2 | 4 FALSE | UBQLN2   |
| 22292 | 3.251982 | 0.000173 | 0.307505 | 0 | 2 | 4 FALSE | USP8     |
| 22303 | 3.183041 | 0.0002   | 0.314165 | 0 | 2 | 4 FALSE | VMA21    |
| 22309 | 3.302488 | 0.000345 | 0.302802 | 0 | 2 | 4 FALSE | VPS35    |
| 22329 | 3.183041 | 0.0002   | 0.314165 | 0 | 2 | 4 FALSE | WBP2     |
| 22344 | 3.183041 | 0.0002   | 0.314165 | 0 | 2 | 4 FALSE | WDR43    |
| 22383 | 3.251982 | 0.000173 | 0.307505 | 0 | 2 | 4 FALSE | ZBTB10   |
| 22413 | 3.183041 | 0.0002   | 0.314165 | 0 | 2 | 4 FALSE | ZFYVE26  |
| 22472 | 3.302488 | 0.000345 | 0.302802 | 0 | 2 | 4 FALSE | ZNF584   |
| 22506 | 3.894562 | 7.65E-05 | 0.256768 | 0 | 2 | 6 FALSE | 1-Mar    |
| 22526 | 3.787281 | 8.67E-05 | 0.264042 | 0 | 2 | 4 FALSE | CNN3     |
| 22540 | 3.92     | 6.66E-05 | 0.255102 | 0 | 2 | 4 FALSE | FPR1     |
| 22543 | 3.787281 | 8.67E-05 | 0.264042 | 0 | 2 | 4 FALSE | GAS7     |
| 22560 | 3.787281 | 8.67E-05 | 0.264042 | 0 | 2 | 4 FALSE | LNPB     |
| 22606 | 3.787281 | 8.67E-05 | 0.264042 | 0 | 2 | 4 FALSE | TBCK     |
| 22664 | 3.720922 | 0.000241 | 0.268751 | 0 | 2 | 4 FALSE | ANKS1A   |
| 22671 | 3.802028 | 9.02E-05 | 0.263018 | 0 | 2 | 4 FALSE | ARHGDI1A |

|       |          |          |          |   |   |         |           |
|-------|----------|----------|----------|---|---|---------|-----------|
| 22689 | 3.782857 | 0.000102 | 0.26435  | 0 | 2 | 4 FALSE | AUTS2     |
| 22720 | 3.576406 | 0.000117 | 0.27961  | 0 | 2 | 4 FALSE | C1orf109  |
| 22723 | 3.80129  | 4.99E-05 | 0.263069 | 0 | 2 | 4 FALSE | C3orf58   |
| 22748 | 3.576406 | 0.000117 | 0.27961  | 0 | 2 | 4 FALSE | CDK16     |
| 22756 | 3.576406 | 0.000117 | 0.27961  | 0 | 2 | 4 FALSE | CHAF1A    |
| 22759 | 3.773641 | 0.000158 | 0.264996 | 0 | 2 | 4 FALSE | CHD4      |
| 22763 | 3.730507 | 0.000149 | 0.26806  | 0 | 2 | 4 FALSE | CHFR      |
| 22773 | 3.738618 | 0.000136 | 0.267479 | 0 | 2 | 4 FALSE | CMTM4     |
| 22793 | 3.782857 | 0.000102 | 0.26435  | 0 | 2 | 4 FALSE | CTIF      |
| 22867 | 3.730507 | 0.000149 | 0.26806  | 0 | 2 | 4 FALSE | FOXN3     |
| 22871 | 3.576406 | 0.000117 | 0.27961  | 0 | 2 | 4 FALSE | FZD3      |
| 22898 | 3.720922 | 0.000241 | 0.268751 | 0 | 2 | 4 FALSE | GNB1L     |
| 22904 | 3.738618 | 0.000136 | 0.267479 | 0 | 2 | 4 FALSE | GPR137C   |
| 22914 | 3.576406 | 0.000117 | 0.27961  | 0 | 2 | 4 FALSE | H6PD      |
| 22946 | 3.576406 | 0.000117 | 0.27961  | 0 | 2 | 4 FALSE | ILF3      |
| 22963 | 3.576406 | 0.000117 | 0.27961  | 0 | 2 | 4 FALSE | KIAA0195  |
| 22979 | 3.576406 | 0.000117 | 0.27961  | 0 | 2 | 4 FALSE | LENG8     |
| 22989 | 3.720922 | 0.000241 | 0.268751 | 0 | 2 | 4 FALSE | LRRC47    |
| 22991 | 3.576406 | 0.000117 | 0.27961  | 0 | 2 | 4 FALSE | LTBP3     |
| 22994 | 3.576406 | 0.000117 | 0.27961  | 0 | 2 | 4 FALSE | LZTS2     |
| 23002 | 3.720922 | 0.000241 | 0.268751 | 0 | 2 | 4 FALSE | MAST3     |
| 23011 | 3.802028 | 9.02E-05 | 0.263018 | 0 | 2 | 4 FALSE | MED28     |
| 23070 | 3.576406 | 0.000117 | 0.27961  | 0 | 2 | 4 FALSE | NPDC1     |
| 23078 | 3.576406 | 0.000117 | 0.27961  | 0 | 2 | 4 FALSE | NUDT16L1  |
| 23103 | 3.720922 | 0.000241 | 0.268751 | 0 | 2 | 4 FALSE | PDXX      |
| 23122 | 3.576406 | 0.000117 | 0.27961  | 0 | 2 | 4 FALSE | POLR3E    |
| 23127 | 3.576406 | 0.000117 | 0.27961  | 0 | 2 | 4 FALSE | PPP1CA    |
| 23138 | 3.738618 | 0.000136 | 0.267479 | 0 | 2 | 4 FALSE | PSMD11    |
| 23141 | 3.802028 | 9.02E-05 | 0.263018 | 0 | 2 | 4 FALSE | PTDSS2    |
| 23148 | 3.738618 | 0.000136 | 0.267479 | 0 | 2 | 4 FALSE | RAB11FIP2 |
| 23159 | 3.738618 | 0.000136 | 0.267479 | 0 | 2 | 4 FALSE | RASL10B   |
| 23181 | 3.576406 | 0.000117 | 0.27961  | 0 | 2 | 4 FALSE | SATB2     |
| 23204 | 3.773641 | 0.000158 | 0.264996 | 0 | 2 | 4 FALSE | SMARCC2   |
| 23251 | 3.576406 | 0.000117 | 0.27961  | 0 | 2 | 4 FALSE | TMEM1321  |
| 23266 | 3.576406 | 0.000117 | 0.27961  | 0 | 2 | 4 FALSE | TNRC18    |
| 23416 | 3.649401 | 0.000136 | 0.274018 | 0 | 2 | 4 FALSE | CENPQ     |
| 23425 | 3.649401 | 0.000136 | 0.274018 | 0 | 2 | 4 FALSE | CRLF3     |
| 23448 | 3.649401 | 0.000136 | 0.274018 | 0 | 2 | 4 FALSE | DONSON    |
| 23566 | 3.824885 | 0.000136 | 0.261446 | 0 | 2 | 4 FALSE | P2RY10    |
| 23584 | 3.649401 | 0.000136 | 0.274018 | 0 | 2 | 4 FALSE | PHACTR4   |
| 23586 | 3.862488 | 0.000107 | 0.2589   | 0 | 2 | 4 FALSE | PIK3C2A   |
| 23619 | 3.824885 | 0.000136 | 0.261446 | 0 | 2 | 4 FALSE | RIF1      |
| 23677 | 3.870599 | 0.000141 | 0.258358 | 0 | 2 | 4 FALSE | UBA3      |
| 23688 | 3.649401 | 0.000136 | 0.274018 | 0 | 2 | 4 FALSE | YPEL2     |
| 23703 | 3.649401 | 0.000136 | 0.274018 | 0 | 2 | 4 FALSE | ZNF248    |
| 23717 | 3.880184 | 9.08E-05 | 0.25772  | 0 | 2 | 4 FALSE | ARGFX     |
| 23725 | 3.714286 | 0.000112 | 0.269231 | 0 | 2 | 4 FALSE | CCNI2     |

|       |          |          |          |   |   |   |       |          |
|-------|----------|----------|----------|---|---|---|-------|----------|
| 23743 | 3.943594 | 2.36E-05 | 0.253576 | 0 | 2 | 6 | FALSE | KCNJ6    |
| 23754 | 3.714286 | 0.000112 | 0.269231 | 0 | 2 | 4 | FALSE | P4HB     |
| 23801 | 3.852903 | 0.000212 | 0.259545 | 0 | 2 | 4 | FALSE | CCDC127  |
| 23807 | 3.87023  | 8.92E-05 | 0.258383 | 0 | 2 | 4 | FALSE | CEBPB    |
| 23846 | 3.87023  | 8.92E-05 | 0.258383 | 0 | 2 | 4 | FALSE | KLF7     |
| 23860 | 3.87023  | 8.92E-05 | 0.258383 | 0 | 2 | 4 | FALSE | MAP2     |
| 23911 | 3.688848 | 0.000183 | 0.271087 | 0 | 2 | 4 | FALSE | SPATA13  |
| 23919 | 3.87023  | 8.92E-05 | 0.258383 | 0 | 2 | 4 | FALSE | SULT1B1  |
| 23948 | 3.688848 | 0.000183 | 0.271087 | 0 | 2 | 4 | FALSE | ZC3H12C  |
| 23974 | 3.716866 | 0.000111 | 0.269044 | 0 | 2 | 4 | FALSE | CAPN15   |
| 24018 | 3.897512 | 0.000105 | 0.256574 | 0 | 2 | 4 | FALSE | TOR4A    |
| 24055 | 3.816774 | 0.000149 | 0.262001 | 0 | 2 | 4 | FALSE | C2orf82  |
| 24099 | 3.6553   | 0.000158 | 0.273575 | 0 | 2 | 4 | FALSE | FMNL3    |
| 24107 | 3.6553   | 0.000158 | 0.273575 | 0 | 2 | 4 | FALSE | GATA2    |
| 24167 | 3.816774 | 0.000149 | 0.262001 | 0 | 2 | 4 | FALSE | LRIG2    |
| 24175 | 3.6553   | 0.000158 | 0.273575 | 0 | 2 | 4 | FALSE | M6PR     |
| 24188 | 3.816774 | 0.000149 | 0.262001 | 0 | 2 | 4 | FALSE | MINOS1   |
| 24207 | 3.6553   | 0.000158 | 0.273575 | 0 | 2 | 4 | FALSE | NKIRAS2  |
| 24219 | 3.6553   | 0.000158 | 0.273575 | 0 | 2 | 4 | FALSE | OXA1L    |
| 24252 | 3.6553   | 0.000158 | 0.273575 | 0 | 2 | 4 | FALSE | RAC3     |
| 24287 | 3.816774 | 0.000149 | 0.262001 | 0 | 2 | 4 | FALSE | SLC10A6  |
| 24346 | 3.6553   | 0.000158 | 0.273575 | 0 | 2 | 4 | FALSE | YWHAZ    |
| 24351 | 3.816774 | 0.000149 | 0.262001 | 0 | 2 | 4 | FALSE | ZMYM1    |
| 24428 | 3.636129 | 0.000307 | 0.275018 | 0 | 2 | 4 | FALSE | CDR1     |
| 24465 | 3.863226 | 8.63E-05 | 0.258851 | 0 | 2 | 4 | FALSE | FADS1    |
| 24467 | 3.636129 | 0.000307 | 0.275018 | 0 | 2 | 4 | FALSE | FBXL18   |
| 24621 | 3.636129 | 0.000307 | 0.275018 | 0 | 2 | 4 | FALSE | PTBP1    |
| 24703 | 3.636129 | 0.000307 | 0.275018 | 0 | 2 | 4 | FALSE | TMEM109  |
| 24801 | 3.699908 | 8.67E-05 | 0.270277 | 0 | 2 | 4 | FALSE | ERGIC2   |
| 24823 | 3.699908 | 8.67E-05 | 0.270277 | 0 | 2 | 4 | FALSE | INIP     |
| 24830 | 3.699908 | 8.67E-05 | 0.270277 | 0 | 2 | 4 | FALSE | LGALS3BP |
| 24883 | 3.699908 | 8.67E-05 | 0.270277 | 0 | 2 | 4 | FALSE | TNPO3    |
| 11832 | 3.496037 | 0        | 0.286038 | 0 | 1 | 4 | FALSE | ABHD10   |
| 11840 | 3.496037 | 0        | 0.286038 | 0 | 1 | 4 | FALSE | ACP2     |
| 11844 | 3.496037 | 0        | 0.286038 | 0 | 1 | 4 | FALSE | ACTN4    |
| 11846 | 3.496037 | 0        | 0.286038 | 0 | 1 | 4 | FALSE | ACVR2B   |
| 11848 | 3.496037 | 0        | 0.286038 | 0 | 1 | 4 | FALSE | ACYP1    |
| 11852 | 3.496037 | 0        | 0.286038 | 0 | 1 | 4 | FALSE | ADAT1    |
| 11858 | 3.496037 | 0        | 0.286038 | 0 | 1 | 4 | FALSE | ADNP2    |
| 11866 | 3.496037 | 0        | 0.286038 | 0 | 1 | 4 | FALSE | AFF4     |
| 11876 | 3.496037 | 0        | 0.286038 | 0 | 1 | 4 | FALSE | AHCY     |
| 11886 | 3.496037 | 0        | 0.286038 | 0 | 1 | 4 | FALSE | AMD1     |
| 11890 | 3.496037 | 0        | 0.286038 | 0 | 1 | 4 | FALSE | ANK3     |
| 11912 | 3.496037 | 0        | 0.286038 | 0 | 1 | 4 | FALSE | AP1S2    |
| 11914 | 3.496037 | 0        | 0.286038 | 0 | 1 | 4 | FALSE | AP1S3    |
| 11918 | 3.496037 | 0        | 0.286038 | 0 | 1 | 4 | FALSE | AP4E1    |
| 11922 | 3.496037 | 0        | 0.286038 | 0 | 1 | 4 | FALSE | APOOL    |

|       |          |   |          |   |   |         |           |
|-------|----------|---|----------|---|---|---------|-----------|
| 11926 | 3.496037 | 0 | 0.286038 | 0 | 1 | 4 FALSE | APPBP2    |
| 11934 | 3.496037 | 0 | 0.286038 | 0 | 1 | 4 FALSE | ARF1      |
| 11942 | 3.496037 | 0 | 0.286038 | 0 | 1 | 4 FALSE | ARHGAP17  |
| 11948 | 3.496037 | 0 | 0.286038 | 0 | 1 | 4 FALSE | ARHGEF11  |
| 11950 | 3.496037 | 0 | 0.286038 | 0 | 1 | 4 FALSE | ARHGEF3   |
| 11954 | 3.496037 | 0 | 0.286038 | 0 | 1 | 4 FALSE | ARID2     |
| 11956 | 3.496037 | 0 | 0.286038 | 0 | 1 | 4 FALSE | ARID4A    |
| 11962 | 3.496037 | 0 | 0.286038 | 0 | 1 | 4 FALSE | ARL4C     |
| 11980 | 3.496037 | 0 | 0.286038 | 0 | 1 | 4 FALSE | ATG12     |
| 11982 | 3.496037 | 0 | 0.286038 | 0 | 1 | 4 FALSE | ATG4D     |
| 11990 | 3.496037 | 0 | 0.286038 | 0 | 1 | 4 FALSE | ATP1B1    |
| 11994 | 3.496037 | 0 | 0.286038 | 0 | 1 | 4 FALSE | ATP5A1    |
| 11996 | 3.496037 | 0 | 0.286038 | 0 | 1 | 4 FALSE | ATP5B     |
| 11998 | 3.496037 | 0 | 0.286038 | 0 | 1 | 4 FALSE | ATP5G3    |
| 12000 | 3.496037 | 0 | 0.286038 | 0 | 1 | 4 FALSE | ATP6AP2   |
| 12012 | 3.496037 | 0 | 0.286038 | 0 | 1 | 4 FALSE | AVPI1     |
| 12014 | 3.496037 | 0 | 0.286038 | 0 | 1 | 4 FALSE | B2M       |
| 12028 | 3.496037 | 0 | 0.286038 | 0 | 1 | 4 FALSE | BCL11B    |
| 12032 | 3.496037 | 0 | 0.286038 | 0 | 1 | 4 FALSE | BCL9      |
| 12040 | 3.496037 | 0 | 0.286038 | 0 | 1 | 4 FALSE | BEND4     |
| 12042 | 3.496037 | 0 | 0.286038 | 0 | 1 | 4 FALSE | BICC1     |
| 12046 | 3.496037 | 0 | 0.286038 | 0 | 1 | 4 FALSE | BIRC5     |
| 12050 | 3.496037 | 0 | 0.286038 | 0 | 1 | 4 FALSE | BLOC1S6   |
| 12054 | 3.496037 | 0 | 0.286038 | 0 | 1 | 4 FALSE | BMT2      |
| 12056 | 3.496037 | 0 | 0.286038 | 0 | 1 | 4 FALSE | BRIP1     |
| 12064 | 3.496037 | 0 | 0.286038 | 0 | 1 | 4 FALSE | BTRC      |
| 12068 | 3.496037 | 0 | 0.286038 | 0 | 1 | 4 FALSE | BZW1      |
| 12070 | 3.496037 | 0 | 0.286038 | 0 | 1 | 4 FALSE | BZW2      |
| 12072 | 3.496037 | 0 | 0.286038 | 0 | 1 | 4 FALSE | C10orf12  |
| 12074 | 3.496037 | 0 | 0.286038 | 0 | 1 | 4 FALSE | C10orf88  |
| 12082 | 3.496037 | 0 | 0.286038 | 0 | 1 | 4 FALSE | C17orf104 |
| 12084 | 3.496037 | 0 | 0.286038 | 0 | 1 | 4 FALSE | C19orf12  |
| 12086 | 3.496037 | 0 | 0.286038 | 0 | 1 | 4 FALSE | C1orf147  |
| 12088 | 3.496037 | 0 | 0.286038 | 0 | 1 | 4 FALSE | C1orf52   |
| 12092 | 3.496037 | 0 | 0.286038 | 0 | 1 | 4 FALSE | C22orf39  |
| 12094 | 3.496037 | 0 | 0.286038 | 0 | 1 | 4 FALSE | C3orf38   |
| 12096 | 3.496037 | 0 | 0.286038 | 0 | 1 | 4 FALSE | C5orf15   |
| 12100 | 3.496037 | 0 | 0.286038 | 0 | 1 | 4 FALSE | C7orf31   |
| 12102 | 3.496037 | 0 | 0.286038 | 0 | 1 | 4 FALSE | C7orf49   |
| 12106 | 3.496037 | 0 | 0.286038 | 0 | 1 | 4 FALSE | C7orf73   |
| 12108 | 3.496037 | 0 | 0.286038 | 0 | 1 | 4 FALSE | C8orf4    |
| 12110 | 3.496037 | 0 | 0.286038 | 0 | 1 | 4 FALSE | C8orf76   |
| 12112 | 3.496037 | 0 | 0.286038 | 0 | 1 | 4 FALSE | CA12      |
| 12114 | 3.496037 | 0 | 0.286038 | 0 | 1 | 4 FALSE | CAAP1     |
| 12128 | 3.496037 | 0 | 0.286038 | 0 | 1 | 4 FALSE | CAPZB     |
| 12130 | 3.496037 | 0 | 0.286038 | 0 | 1 | 4 FALSE | CARNMT1   |
| 12136 | 3.496037 | 0 | 0.286038 | 0 | 1 | 4 FALSE | CBX2      |

|       |          |   |          |   |   |         |          |
|-------|----------|---|----------|---|---|---------|----------|
| 12146 | 3.496037 | 0 | 0.286038 | 0 | 1 | 4 FALSE | CCDC186  |
| 12148 | 3.496037 | 0 | 0.286038 | 0 | 1 | 4 FALSE | CCNC     |
| 12160 | 3.496037 | 0 | 0.286038 | 0 | 1 | 4 FALSE | CCNJ     |
| 12164 | 3.496037 | 0 | 0.286038 | 0 | 1 | 4 FALSE | CCNY     |
| 12174 | 3.496037 | 0 | 0.286038 | 0 | 1 | 4 FALSE | CD38     |
| 12182 | 3.496037 | 0 | 0.286038 | 0 | 1 | 4 FALSE | CD55     |
| 12200 | 3.496037 | 0 | 0.286038 | 0 | 1 | 4 FALSE | CDH5     |
| 12202 | 3.496037 | 0 | 0.286038 | 0 | 1 | 4 FALSE | CDK1     |
| 12206 | 3.496037 | 0 | 0.286038 | 0 | 1 | 4 FALSE | CDK2AP1  |
| 12210 | 3.496037 | 0 | 0.286038 | 0 | 1 | 4 FALSE | CDK8     |
| 12214 | 3.496037 | 0 | 0.286038 | 0 | 1 | 4 FALSE | CEBPA    |
| 12216 | 3.496037 | 0 | 0.286038 | 0 | 1 | 4 FALSE | CEBPD    |
| 12218 | 3.496037 | 0 | 0.286038 | 0 | 1 | 4 FALSE | CELF2    |
| 12222 | 3.496037 | 0 | 0.286038 | 0 | 1 | 4 FALSE | CERK     |
| 12232 | 3.496037 | 0 | 0.286038 | 0 | 1 | 4 FALSE | CHAMP1   |
| 12242 | 3.496037 | 0 | 0.286038 | 0 | 1 | 4 FALSE | CHRAC1   |
| 12244 | 3.496037 | 0 | 0.286038 | 0 | 1 | 4 FALSE | CHST15   |
| 12246 | 3.496037 | 0 | 0.286038 | 0 | 1 | 4 FALSE | CHSY1    |
| 12248 | 3.496037 | 0 | 0.286038 | 0 | 1 | 4 FALSE | CIAPIN1  |
| 12250 | 3.496037 | 0 | 0.286038 | 0 | 1 | 4 FALSE | CIC      |
| 12252 | 3.496037 | 0 | 0.286038 | 0 | 1 | 4 FALSE | CKAP2    |
| 12254 | 3.496037 | 0 | 0.286038 | 0 | 1 | 4 FALSE | CKS2     |
| 12258 | 3.496037 | 0 | 0.286038 | 0 | 1 | 4 FALSE | CLCN3    |
| 12260 | 3.496037 | 0 | 0.286038 | 0 | 1 | 4 FALSE | CLDN4    |
| 12268 | 3.496037 | 0 | 0.286038 | 0 | 1 | 4 FALSE | CLSPN    |
| 12270 | 3.496037 | 0 | 0.286038 | 0 | 1 | 4 FALSE | CLSTN1   |
| 12274 | 3.496037 | 0 | 0.286038 | 0 | 1 | 4 FALSE | CMIP     |
| 12276 | 3.496037 | 0 | 0.286038 | 0 | 1 | 4 FALSE | CMTM6    |
| 12278 | 3.496037 | 0 | 0.286038 | 0 | 1 | 4 FALSE | CNEP1R1  |
| 12286 | 3.496037 | 0 | 0.286038 | 0 | 1 | 4 FALSE | COPS7B   |
| 12294 | 3.496037 | 0 | 0.286038 | 0 | 1 | 4 FALSE | CPEB1    |
| 12304 | 3.496037 | 0 | 0.286038 | 0 | 1 | 4 FALSE | CPS1     |
| 12316 | 3.496037 | 0 | 0.286038 | 0 | 1 | 4 FALSE | CSF1     |
| 12324 | 3.496037 | 0 | 0.286038 | 0 | 1 | 4 FALSE | CSRP2    |
| 12338 | 3.496037 | 0 | 0.286038 | 0 | 1 | 4 FALSE | CYP51A1  |
| 12346 | 3.496037 | 0 | 0.286038 | 0 | 1 | 4 FALSE | DCAF12L2 |
| 12354 | 3.496037 | 0 | 0.286038 | 0 | 1 | 4 FALSE | DCLRE1B  |
| 12364 | 3.496037 | 0 | 0.286038 | 0 | 1 | 4 FALSE | DDAH1    |
| 12376 | 3.496037 | 0 | 0.286038 | 0 | 1 | 4 FALSE | DENND5B  |
| 12378 | 3.496037 | 0 | 0.286038 | 0 | 1 | 4 FALSE | DERL2    |
| 12380 | 3.496037 | 0 | 0.286038 | 0 | 1 | 4 FALSE | DGCR2    |
| 12382 | 3.496037 | 0 | 0.286038 | 0 | 1 | 4 FALSE | DHTKD1   |
| 12392 | 3.496037 | 0 | 0.286038 | 0 | 1 | 4 FALSE | DIDO1    |
| 12394 | 3.496037 | 0 | 0.286038 | 0 | 1 | 4 FALSE | DIMT1    |
| 12396 | 3.496037 | 0 | 0.286038 | 0 | 1 | 4 FALSE | DIP2B    |
| 12398 | 3.496037 | 0 | 0.286038 | 0 | 1 | 4 FALSE | DIS3     |
| 12400 | 3.496037 | 0 | 0.286038 | 0 | 1 | 4 FALSE | DLG3     |

|       |          |   |          |   |   |         |          |
|-------|----------|---|----------|---|---|---------|----------|
| 12404 | 3.496037 | 0 | 0.286038 | 0 | 1 | 4 FALSE | DLX1     |
| 12410 | 3.496037 | 0 | 0.286038 | 0 | 1 | 4 FALSE | DNAJC3   |
| 12420 | 3.496037 | 0 | 0.286038 | 0 | 1 | 4 FALSE | DSC1     |
| 12434 | 3.496037 | 0 | 0.286038 | 0 | 1 | 4 FALSE | DYRK2    |
| 12438 | 3.496037 | 0 | 0.286038 | 0 | 1 | 4 FALSE | EAPP     |
| 12440 | 3.496037 | 0 | 0.286038 | 0 | 1 | 4 FALSE | EBAG9    |
| 12446 | 3.496037 | 0 | 0.286038 | 0 | 1 | 4 FALSE | EEA1     |
| 12448 | 3.496037 | 0 | 0.286038 | 0 | 1 | 4 FALSE | EED      |
| 12454 | 3.496037 | 0 | 0.286038 | 0 | 1 | 4 FALSE | EFHD1    |
| 12456 | 3.496037 | 0 | 0.286038 | 0 | 1 | 4 FALSE | EIF2S1   |
| 12458 | 3.496037 | 0 | 0.286038 | 0 | 1 | 4 FALSE | EIF2S3   |
| 12460 | 3.496037 | 0 | 0.286038 | 0 | 1 | 4 FALSE | EIF3L    |
| 12462 | 3.496037 | 0 | 0.286038 | 0 | 1 | 4 FALSE | EIF3M    |
| 12472 | 3.496037 | 0 | 0.286038 | 0 | 1 | 4 FALSE | ELAVL3   |
| 12488 | 3.496037 | 0 | 0.286038 | 0 | 1 | 4 FALSE | EPB41L4B |
| 12492 | 3.496037 | 0 | 0.286038 | 0 | 1 | 4 FALSE | EPC2     |
| 12494 | 3.496037 | 0 | 0.286038 | 0 | 1 | 4 FALSE | ERBB2IP  |
| 12496 | 3.496037 | 0 | 0.286038 | 0 | 1 | 4 FALSE | ERH      |
| 12502 | 3.496037 | 0 | 0.286038 | 0 | 1 | 4 FALSE | ERO1LB   |
| 12510 | 3.496037 | 0 | 0.286038 | 0 | 1 | 4 FALSE | EVL      |
| 12516 | 3.496037 | 0 | 0.286038 | 0 | 1 | 4 FALSE | EXPH5    |
| 12520 | 3.496037 | 0 | 0.286038 | 0 | 1 | 4 FALSE | EYA1     |
| 12522 | 3.496037 | 0 | 0.286038 | 0 | 1 | 4 FALSE | EYA4     |
| 12526 | 3.496037 | 0 | 0.286038 | 0 | 1 | 4 FALSE | FAM103A1 |
| 12528 | 3.496037 | 0 | 0.286038 | 0 | 1 | 4 FALSE | FAM110C  |
| 12530 | 3.496037 | 0 | 0.286038 | 0 | 1 | 4 FALSE | FAM115A  |
| 12532 | 3.496037 | 0 | 0.286038 | 0 | 1 | 4 FALSE | FAM117B  |
| 12534 | 3.496037 | 0 | 0.286038 | 0 | 1 | 4 FALSE | FAM174A  |
| 12536 | 3.496037 | 0 | 0.286038 | 0 | 1 | 4 FALSE | FAM175A  |
| 12540 | 3.496037 | 0 | 0.286038 | 0 | 1 | 4 FALSE | FAM222B  |
| 12548 | 3.496037 | 0 | 0.286038 | 0 | 1 | 4 FALSE | FAM73A   |
| 12550 | 3.496037 | 0 | 0.286038 | 0 | 1 | 4 FALSE | FAM78A   |
| 12558 | 3.496037 | 0 | 0.286038 | 0 | 1 | 4 FALSE | FAM96A   |
| 12560 | 3.496037 | 0 | 0.286038 | 0 | 1 | 4 FALSE | FAM98A   |
| 12570 | 3.496037 | 0 | 0.286038 | 0 | 1 | 4 FALSE | FAT4     |
| 12578 | 3.496037 | 0 | 0.286038 | 0 | 1 | 4 FALSE | FBXL5    |
| 12582 | 3.496037 | 0 | 0.286038 | 0 | 1 | 4 FALSE | FBXO30   |
| 12586 | 3.496037 | 0 | 0.286038 | 0 | 1 | 4 FALSE | FBXW7    |
| 12588 | 3.496037 | 0 | 0.286038 | 0 | 1 | 4 FALSE | FGF1     |
| 12592 | 3.496037 | 0 | 0.286038 | 0 | 1 | 4 FALSE | FH       |
| 12596 | 3.496037 | 0 | 0.286038 | 0 | 1 | 4 FALSE | FKBP14   |
| 12600 | 3.496037 | 0 | 0.286038 | 0 | 1 | 4 FALSE | FLVCR1   |
| 12602 | 3.496037 | 0 | 0.286038 | 0 | 1 | 4 FALSE | FMN2     |
| 12614 | 3.496037 | 0 | 0.286038 | 0 | 1 | 4 FALSE | FOXF1    |
| 12618 | 3.496037 | 0 | 0.286038 | 0 | 1 | 4 FALSE | FOXP4    |
| 12638 | 3.496037 | 0 | 0.286038 | 0 | 1 | 4 FALSE | GAB1     |
| 12642 | 3.496037 | 0 | 0.286038 | 0 | 1 | 4 FALSE | GATA3    |

|       |          |   |          |   |   |         |           |
|-------|----------|---|----------|---|---|---------|-----------|
| 12650 | 3.496037 | 0 | 0.286038 | 0 | 1 | 4 FALSE | GCLM      |
| 12654 | 3.496037 | 0 | 0.286038 | 0 | 1 | 4 FALSE | GCNT1     |
| 12656 | 3.496037 | 0 | 0.286038 | 0 | 1 | 4 FALSE | GDE1      |
| 12660 | 3.496037 | 0 | 0.286038 | 0 | 1 | 4 FALSE | GFRA1     |
| 12662 | 3.496037 | 0 | 0.286038 | 0 | 1 | 4 FALSE | GLCC11    |
| 12664 | 3.496037 | 0 | 0.286038 | 0 | 1 | 4 FALSE | GLRX5     |
| 12666 | 3.496037 | 0 | 0.286038 | 0 | 1 | 4 FALSE | GLTSCR1   |
| 12676 | 3.496037 | 0 | 0.286038 | 0 | 1 | 4 FALSE | GNB1      |
| 12678 | 3.496037 | 0 | 0.286038 | 0 | 1 | 4 FALSE | GNB4      |
| 12680 | 3.496037 | 0 | 0.286038 | 0 | 1 | 4 FALSE | GNG12     |
| 12682 | 3.496037 | 0 | 0.286038 | 0 | 1 | 4 FALSE | GNG2      |
| 12684 | 3.496037 | 0 | 0.286038 | 0 | 1 | 4 FALSE | GPNPAT1   |
| 12688 | 3.496037 | 0 | 0.286038 | 0 | 1 | 4 FALSE | GOLGA4    |
| 12692 | 3.496037 | 0 | 0.286038 | 0 | 1 | 4 FALSE | GOLGA8A   |
| 12698 | 3.496037 | 0 | 0.286038 | 0 | 1 | 4 FALSE | GPATCH2L  |
| 12704 | 3.496037 | 0 | 0.286038 | 0 | 1 | 4 FALSE | GPR135    |
| 12706 | 3.496037 | 0 | 0.286038 | 0 | 1 | 4 FALSE | GPR27     |
| 12708 | 3.496037 | 0 | 0.286038 | 0 | 1 | 4 FALSE | GPR50     |
| 12718 | 3.496037 | 0 | 0.286038 | 0 | 1 | 4 FALSE | GRPEL2    |
| 12728 | 3.496037 | 0 | 0.286038 | 0 | 1 | 4 FALSE | GTF2E1    |
| 12732 | 3.496037 | 0 | 0.286038 | 0 | 1 | 4 FALSE | GULP1     |
| 12734 | 3.496037 | 0 | 0.286038 | 0 | 1 | 4 FALSE | H2AFV     |
| 12736 | 3.496037 | 0 | 0.286038 | 0 | 1 | 4 FALSE | H2AFZ     |
| 12738 | 3.496037 | 0 | 0.286038 | 0 | 1 | 4 FALSE | HABP4     |
| 12740 | 3.496037 | 0 | 0.286038 | 0 | 1 | 4 FALSE | HAUS6     |
| 12748 | 3.496037 | 0 | 0.286038 | 0 | 1 | 4 FALSE | HEATR6    |
| 12754 | 3.496037 | 0 | 0.286038 | 0 | 1 | 4 FALSE | HEG1      |
| 12758 | 3.496037 | 0 | 0.286038 | 0 | 1 | 4 FALSE | HELZ      |
| 12760 | 3.496037 | 0 | 0.286038 | 0 | 1 | 4 FALSE | HEXIM1    |
| 12762 | 3.496037 | 0 | 0.286038 | 0 | 1 | 4 FALSE | HFE       |
| 12776 | 3.496037 | 0 | 0.286038 | 0 | 1 | 4 FALSE | HIST2H2BE |
| 12780 | 3.496037 | 0 | 0.286038 | 0 | 1 | 4 FALSE | HMGB2     |
| 12790 | 3.496037 | 0 | 0.286038 | 0 | 1 | 4 FALSE | HNRNPAB   |
| 12792 | 3.496037 | 0 | 0.286038 | 0 | 1 | 4 FALSE | HNRNPDL   |
| 12806 | 3.496037 | 0 | 0.286038 | 0 | 1 | 4 FALSE | HOXC13    |
| 12824 | 3.496037 | 0 | 0.286038 | 0 | 1 | 4 FALSE | HSPD1     |
| 12826 | 3.496037 | 0 | 0.286038 | 0 | 1 | 4 FALSE | HSPE1-MO  |
| 12830 | 3.496037 | 0 | 0.286038 | 0 | 1 | 4 FALSE | ICK       |
| 12840 | 3.496037 | 0 | 0.286038 | 0 | 1 | 4 FALSE | IFFO2     |
| 12852 | 3.496037 | 0 | 0.286038 | 0 | 1 | 4 FALSE | IGIP      |
| 12854 | 3.496037 | 0 | 0.286038 | 0 | 1 | 4 FALSE | IL20RB    |
| 12856 | 3.496037 | 0 | 0.286038 | 0 | 1 | 4 FALSE | IMPA1     |
| 12866 | 3.496037 | 0 | 0.286038 | 0 | 1 | 4 FALSE | IRF1      |
| 12872 | 3.496037 | 0 | 0.286038 | 0 | 1 | 4 FALSE | ISOC1     |
| 12878 | 3.496037 | 0 | 0.286038 | 0 | 1 | 4 FALSE | ITM2C     |
| 12880 | 3.496037 | 0 | 0.286038 | 0 | 1 | 4 FALSE | ITPRIP    |
| 12882 | 3.496037 | 0 | 0.286038 | 0 | 1 | 4 FALSE | JAK2      |



|       |          |   |          |   |   |         |           |
|-------|----------|---|----------|---|---|---------|-----------|
| 12886 | 3.496037 | 0 | 0.286038 | 0 | 1 | 4 FALSE | JCAD      |
| 12890 | 3.496037 | 0 | 0.286038 | 0 | 1 | 4 FALSE | JRKL      |
| 12898 | 3.496037 | 0 | 0.286038 | 0 | 1 | 4 FALSE | KCNG3     |
| 12902 | 3.496037 | 0 | 0.286038 | 0 | 1 | 4 FALSE | KCTD14    |
| 12910 | 3.496037 | 0 | 0.286038 | 0 | 1 | 4 FALSE | KHDRBS1   |
| 12912 | 3.496037 | 0 | 0.286038 | 0 | 1 | 4 FALSE | KHNYN     |
| 12930 | 3.496037 | 0 | 0.286038 | 0 | 1 | 4 FALSE | KIF2C     |
| 12934 | 3.496037 | 0 | 0.286038 | 0 | 1 | 4 FALSE | KL        |
| 12946 | 3.496037 | 0 | 0.286038 | 0 | 1 | 4 FALSE | KLHL23    |
| 12952 | 3.496037 | 0 | 0.286038 | 0 | 1 | 4 FALSE | KPNA2     |
| 12954 | 3.496037 | 0 | 0.286038 | 0 | 1 | 4 FALSE | KPNA4     |
| 12966 | 3.496037 | 0 | 0.286038 | 0 | 1 | 4 FALSE | LARP4B    |
| 12968 | 3.496037 | 0 | 0.286038 | 0 | 1 | 4 FALSE | LATS2     |
| 12974 | 3.496037 | 0 | 0.286038 | 0 | 1 | 4 FALSE | LDB1      |
| 12976 | 3.496037 | 0 | 0.286038 | 0 | 1 | 4 FALSE | LEFTY1    |
| 12980 | 3.496037 | 0 | 0.286038 | 0 | 1 | 4 FALSE | LIG4      |
| 12986 | 3.496037 | 0 | 0.286038 | 0 | 1 | 4 FALSE | LMNB1     |
| 12992 | 3.496037 | 0 | 0.286038 | 0 | 1 | 4 FALSE | LNX2      |
| 12994 | 3.496037 | 0 | 0.286038 | 0 | 1 | 4 FALSE | LONRF2    |
| 12996 | 3.496037 | 0 | 0.286038 | 0 | 1 | 4 FALSE | LONRF3    |
| 13002 | 3.496037 | 0 | 0.286038 | 0 | 1 | 4 FALSE | LRCH2     |
| 13006 | 3.496037 | 0 | 0.286038 | 0 | 1 | 4 FALSE | LRP12     |
| 13008 | 3.496037 | 0 | 0.286038 | 0 | 1 | 4 FALSE | LRRC1     |
| 13012 | 3.496037 | 0 | 0.286038 | 0 | 1 | 4 FALSE | LSM14A    |
| 13016 | 3.496037 | 0 | 0.286038 | 0 | 1 | 4 FALSE | LUC7L3    |
| 13018 | 3.496037 | 0 | 0.286038 | 0 | 1 | 4 FALSE | LYSMD3    |
| 13022 | 3.496037 | 0 | 0.286038 | 0 | 1 | 4 FALSE | MAD2L1    |
| 13026 | 3.496037 | 0 | 0.286038 | 0 | 1 | 4 FALSE | MAGI1     |
| 13030 | 3.496037 | 0 | 0.286038 | 0 | 1 | 4 FALSE | MAK16     |
| 13034 | 3.496037 | 0 | 0.286038 | 0 | 1 | 4 FALSE | MANF      |
| 13040 | 3.496037 | 0 | 0.286038 | 0 | 1 | 4 FALSE | MAP3K13   |
| 13044 | 3.496037 | 0 | 0.286038 | 0 | 1 | 4 FALSE | MAP3K4    |
| 13050 | 3.496037 | 0 | 0.286038 | 0 | 1 | 4 FALSE | MAP7D3    |
| 13062 | 3.496037 | 0 | 0.286038 | 0 | 1 | 4 FALSE | MAST4     |
| 13064 | 3.496037 | 0 | 0.286038 | 0 | 1 | 4 FALSE | MASTL     |
| 13066 | 3.496037 | 0 | 0.286038 | 0 | 1 | 4 FALSE | MAT2B     |
| 13072 | 3.496037 | 0 | 0.286038 | 0 | 1 | 4 FALSE | MBD1      |
| 13082 | 3.496037 | 0 | 0.286038 | 0 | 1 | 4 FALSE | MBTD1     |
| 13090 | 3.496037 | 0 | 0.286038 | 0 | 1 | 4 FALSE | MCUR1     |
| 13096 | 3.496037 | 0 | 0.286038 | 0 | 1 | 4 FALSE | MED6      |
| 13102 | 3.496037 | 0 | 0.286038 | 0 | 1 | 4 FALSE | MEGF9     |
| 13104 | 3.496037 | 0 | 0.286038 | 0 | 1 | 4 FALSE | MEIS1     |
| 13106 | 3.496037 | 0 | 0.286038 | 0 | 1 | 4 FALSE | MESDC2    |
| 13112 | 3.496037 | 0 | 0.286038 | 0 | 1 | 4 FALSE | METTL3    |
| 13126 | 3.496037 | 0 | 0.286038 | 0 | 1 | 4 FALSE | MGAT5     |
| 13130 | 3.496037 | 0 | 0.286038 | 0 | 1 | 4 FALSE | MIRLET7B+ |
| 13152 | 3.496037 | 0 | 0.286038 | 0 | 1 | 4 FALSE | MNX1      |

|       |          |   |          |   |   |         |         |
|-------|----------|---|----------|---|---|---------|---------|
| 13156 | 3.496037 | 0 | 0.286038 | 0 | 1 | 4 FALSE | MOB3C   |
| 13158 | 3.496037 | 0 | 0.286038 | 0 | 1 | 4 FALSE | MOB4    |
| 13160 | 3.496037 | 0 | 0.286038 | 0 | 1 | 4 FALSE | MON2    |
| 13166 | 3.496037 | 0 | 0.286038 | 0 | 1 | 4 FALSE | MPP5    |
| 13168 | 3.496037 | 0 | 0.286038 | 0 | 1 | 4 FALSE | MPPE1   |
| 13174 | 3.496037 | 0 | 0.286038 | 0 | 1 | 4 FALSE | MRGBP   |
| 13176 | 3.496037 | 0 | 0.286038 | 0 | 1 | 4 FALSE | MRPL35  |
| 13178 | 3.496037 | 0 | 0.286038 | 0 | 1 | 4 FALSE | MRPL42  |
| 13180 | 3.496037 | 0 | 0.286038 | 0 | 1 | 4 FALSE | MRPL44  |
| 13182 | 3.496037 | 0 | 0.286038 | 0 | 1 | 4 FALSE | MRPS12  |
| 13184 | 3.496037 | 0 | 0.286038 | 0 | 1 | 4 FALSE | MSH2    |
| 13186 | 3.496037 | 0 | 0.286038 | 0 | 1 | 4 FALSE | MSI2    |
| 13194 | 3.496037 | 0 | 0.286038 | 0 | 1 | 4 FALSE | MTHFD2  |
| 13200 | 3.496037 | 0 | 0.286038 | 0 | 1 | 4 FALSE | MTMR7   |
| 13202 | 3.496037 | 0 | 0.286038 | 0 | 1 | 4 FALSE | MTOR    |
| 13206 | 3.496037 | 0 | 0.286038 | 0 | 1 | 4 FALSE | MTSS1L  |
| 13210 | 3.496037 | 0 | 0.286038 | 0 | 1 | 4 FALSE | MYH6    |
| 13216 | 3.496037 | 0 | 0.286038 | 0 | 1 | 4 FALSE | MYO9A   |
| 13222 | 3.496037 | 0 | 0.286038 | 0 | 1 | 4 FALSE | N4BP2L2 |
| 13228 | 3.496037 | 0 | 0.286038 | 0 | 1 | 4 FALSE | NACA2   |
| 13232 | 3.496037 | 0 | 0.286038 | 0 | 1 | 4 FALSE | NANOGB  |
| 13236 | 3.496037 | 0 | 0.286038 | 0 | 1 | 4 FALSE | NARS    |
| 13242 | 3.496037 | 0 | 0.286038 | 0 | 1 | 4 FALSE | NCL     |
| 13248 | 3.496037 | 0 | 0.286038 | 0 | 1 | 4 FALSE | NDFIP1  |
| 13250 | 3.496037 | 0 | 0.286038 | 0 | 1 | 4 FALSE | NDNL2   |
| 13252 | 3.496037 | 0 | 0.286038 | 0 | 1 | 4 FALSE | NDUFA2  |
| 13254 | 3.496037 | 0 | 0.286038 | 0 | 1 | 4 FALSE | NECAB1  |
| 13256 | 3.496037 | 0 | 0.286038 | 0 | 1 | 4 FALSE | NEK4    |
| 13260 | 3.496037 | 0 | 0.286038 | 0 | 1 | 4 FALSE | NETO2   |
| 13262 | 3.496037 | 0 | 0.286038 | 0 | 1 | 4 FALSE | NFE2L2  |
| 13268 | 3.496037 | 0 | 0.286038 | 0 | 1 | 4 FALSE | NIP7    |
| 13272 | 3.496037 | 0 | 0.286038 | 0 | 1 | 4 FALSE | NKAP    |
| 13274 | 3.496037 | 0 | 0.286038 | 0 | 1 | 4 FALSE | NKRF    |
| 13276 | 3.496037 | 0 | 0.286038 | 0 | 1 | 4 FALSE | NKX3-2  |
| 13278 | 3.496037 | 0 | 0.286038 | 0 | 1 | 4 FALSE | NKX6-1  |
| 13280 | 3.496037 | 0 | 0.286038 | 0 | 1 | 4 FALSE | NLK     |
| 13284 | 3.496037 | 0 | 0.286038 | 0 | 1 | 4 FALSE | NOP2    |
| 13288 | 3.496037 | 0 | 0.286038 | 0 | 1 | 4 FALSE | NPC1L1  |
| 13294 | 3.496037 | 0 | 0.286038 | 0 | 1 | 4 FALSE | NR2F2   |
| 13306 | 3.496037 | 0 | 0.286038 | 0 | 1 | 4 FALSE | NSA2    |
| 13310 | 3.496037 | 0 | 0.286038 | 0 | 1 | 4 FALSE | NT5C3A  |
| 13316 | 3.496037 | 0 | 0.286038 | 0 | 1 | 4 FALSE | NUP205  |
| 13318 | 3.496037 | 0 | 0.286038 | 0 | 1 | 4 FALSE | NUP62   |
| 13320 | 3.496037 | 0 | 0.286038 | 0 | 1 | 4 FALSE | NUP88   |
| 13326 | 3.496037 | 0 | 0.286038 | 0 | 1 | 4 FALSE | NXT2    |
| 13328 | 3.496037 | 0 | 0.286038 | 0 | 1 | 4 FALSE | OPN3    |
| 13332 | 3.496037 | 0 | 0.286038 | 0 | 1 | 4 FALSE | OSBPL9  |

|       |          |   |          |   |   |         |           |
|-------|----------|---|----------|---|---|---------|-----------|
| 13334 | 3.496037 | 0 | 0.286038 | 0 | 1 | 4 FALSE | OSGIN2    |
| 13338 | 3.496037 | 0 | 0.286038 | 0 | 1 | 4 FALSE | OTUD3     |
| 13344 | 3.496037 | 0 | 0.286038 | 0 | 1 | 4 FALSE | OVGP1     |
| 13346 | 3.496037 | 0 | 0.286038 | 0 | 1 | 4 FALSE | OXR1      |
| 13348 | 3.496037 | 0 | 0.286038 | 0 | 1 | 4 FALSE | PABPC1L2/ |
| 13356 | 3.496037 | 0 | 0.286038 | 0 | 1 | 4 FALSE | PAK3      |
| 13362 | 3.496037 | 0 | 0.286038 | 0 | 1 | 4 FALSE | PAPD7     |
| 13368 | 3.496037 | 0 | 0.286038 | 0 | 1 | 4 FALSE | PAQR7     |
| 13374 | 3.496037 | 0 | 0.286038 | 0 | 1 | 4 FALSE | PCCB      |
| 13380 | 3.496037 | 0 | 0.286038 | 0 | 1 | 4 FALSE | PCDHB16   |
| 13386 | 3.496037 | 0 | 0.286038 | 0 | 1 | 4 FALSE | PCNXL2    |
| 13390 | 3.496037 | 0 | 0.286038 | 0 | 1 | 4 FALSE | PDCD4     |
| 13392 | 3.496037 | 0 | 0.286038 | 0 | 1 | 4 FALSE | PDE4D     |
| 13394 | 3.496037 | 0 | 0.286038 | 0 | 1 | 4 FALSE | PDHX      |
| 13404 | 3.496037 | 0 | 0.286038 | 0 | 1 | 4 FALSE | PEBP1     |
| 13408 | 3.496037 | 0 | 0.286038 | 0 | 1 | 4 FALSE | PEX5L     |
| 13412 | 3.496037 | 0 | 0.286038 | 0 | 1 | 4 FALSE | PGBD4     |
| 13414 | 3.496037 | 0 | 0.286038 | 0 | 1 | 4 FALSE | PGM2      |
| 13416 | 3.496037 | 0 | 0.286038 | 0 | 1 | 4 FALSE | PGRMC2    |
| 13428 | 3.496037 | 0 | 0.286038 | 0 | 1 | 4 FALSE | PIAS1     |
| 13430 | 3.496037 | 0 | 0.286038 | 0 | 1 | 4 FALSE | PIGC      |
| 13432 | 3.496037 | 0 | 0.286038 | 0 | 1 | 4 FALSE | PIK3C2B   |
| 13444 | 3.496037 | 0 | 0.286038 | 0 | 1 | 4 FALSE | PIP5K1C   |
| 13448 | 3.496037 | 0 | 0.286038 | 0 | 1 | 4 FALSE | PITPNB    |
| 13452 | 3.496037 | 0 | 0.286038 | 0 | 1 | 4 FALSE | PKIA      |
| 13456 | 3.496037 | 0 | 0.286038 | 0 | 1 | 4 FALSE | PLA2R1    |
| 13466 | 3.496037 | 0 | 0.286038 | 0 | 1 | 4 FALSE | PLEKHA8   |
| 13468 | 3.496037 | 0 | 0.286038 | 0 | 1 | 4 FALSE | PMF1      |
| 13472 | 3.496037 | 0 | 0.286038 | 0 | 1 | 4 FALSE | PNISR     |
| 13474 | 3.496037 | 0 | 0.286038 | 0 | 1 | 4 FALSE | PNLIPRP2  |
| 13476 | 3.496037 | 0 | 0.286038 | 0 | 1 | 4 FALSE | POLR1E    |
| 13478 | 3.496037 | 0 | 0.286038 | 0 | 1 | 4 FALSE | POLR3K    |
| 13480 | 3.496037 | 0 | 0.286038 | 0 | 1 | 4 FALSE | POM121    |
| 13482 | 3.496037 | 0 | 0.286038 | 0 | 1 | 4 FALSE | POMP      |
| 13484 | 3.496037 | 0 | 0.286038 | 0 | 1 | 4 FALSE | POMT1     |
| 13488 | 3.496037 | 0 | 0.286038 | 0 | 1 | 4 FALSE | PPAP2B    |
| 13496 | 3.496037 | 0 | 0.286038 | 0 | 1 | 4 FALSE | PPP1CB    |
| 13502 | 3.496037 | 0 | 0.286038 | 0 | 1 | 4 FALSE | PPP1R2    |
| 13506 | 3.496037 | 0 | 0.286038 | 0 | 1 | 4 FALSE | PPP2R3A   |
| 13518 | 3.496037 | 0 | 0.286038 | 0 | 1 | 4 FALSE | PPP4R1    |
| 13520 | 3.496037 | 0 | 0.286038 | 0 | 1 | 4 FALSE | PPP6C     |
| 13528 | 3.496037 | 0 | 0.286038 | 0 | 1 | 4 FALSE | PRDM16    |
| 13534 | 3.496037 | 0 | 0.286038 | 0 | 1 | 4 FALSE | PRICKLE1  |
| 13542 | 3.496037 | 0 | 0.286038 | 0 | 1 | 4 FALSE | PRKAB1    |
| 13548 | 3.496037 | 0 | 0.286038 | 0 | 1 | 4 FALSE | PRPF38B   |
| 13550 | 3.496037 | 0 | 0.286038 | 0 | 1 | 4 FALSE | PRR11     |
| 13552 | 3.496037 | 0 | 0.286038 | 0 | 1 | 4 FALSE | PRRC1     |

|       |          |   |          |   |   |         |         |
|-------|----------|---|----------|---|---|---------|---------|
| 13558 | 3.496037 | 0 | 0.286038 | 0 | 1 | 4 FALSE | PSEN1   |
| 13560 | 3.496037 | 0 | 0.286038 | 0 | 1 | 4 FALSE | PSMB1   |
| 13564 | 3.496037 | 0 | 0.286038 | 0 | 1 | 4 FALSE | PSMD1   |
| 13566 | 3.496037 | 0 | 0.286038 | 0 | 1 | 4 FALSE | PSME4   |
| 13572 | 3.496037 | 0 | 0.286038 | 0 | 1 | 4 FALSE | PTGER4  |
| 13574 | 3.496037 | 0 | 0.286038 | 0 | 1 | 4 FALSE | PTGFRN  |
| 13578 | 3.496037 | 0 | 0.286038 | 0 | 1 | 4 FALSE | PTPLAD1 |
| 13580 | 3.496037 | 0 | 0.286038 | 0 | 1 | 4 FALSE | PTPN1   |
| 13584 | 3.496037 | 0 | 0.286038 | 0 | 1 | 4 FALSE | PTPN22  |
| 13588 | 3.496037 | 0 | 0.286038 | 0 | 1 | 4 FALSE | PTPN9   |
| 13602 | 3.496037 | 0 | 0.286038 | 0 | 1 | 4 FALSE | PUS7L   |
| 13604 | 3.496037 | 0 | 0.286038 | 0 | 1 | 4 FALSE | PVRL1   |
| 13606 | 3.496037 | 0 | 0.286038 | 0 | 1 | 4 FALSE | PVRL2   |
| 13608 | 3.496037 | 0 | 0.286038 | 0 | 1 | 4 FALSE | PYGO2   |
| 13610 | 3.496037 | 0 | 0.286038 | 0 | 1 | 4 FALSE | QDPR    |
| 13624 | 3.496037 | 0 | 0.286038 | 0 | 1 | 4 FALSE | RAB39B  |
| 13628 | 3.496037 | 0 | 0.286038 | 0 | 1 | 4 FALSE | RAB5A   |
| 13638 | 3.496037 | 0 | 0.286038 | 0 | 1 | 4 FALSE | RALBP1  |
| 13640 | 3.496037 | 0 | 0.286038 | 0 | 1 | 4 FALSE | RANBP2  |
| 13644 | 3.496037 | 0 | 0.286038 | 0 | 1 | 4 FALSE | RANBP9  |
| 13656 | 3.496037 | 0 | 0.286038 | 0 | 1 | 4 FALSE | RARS    |
| 13658 | 3.496037 | 0 | 0.286038 | 0 | 1 | 4 FALSE | RARS2   |
| 13666 | 3.496037 | 0 | 0.286038 | 0 | 1 | 4 FALSE | RBL2    |
| 13678 | 3.496037 | 0 | 0.286038 | 0 | 1 | 4 FALSE | RCN2    |
| 13690 | 3.496037 | 0 | 0.286038 | 0 | 1 | 4 FALSE | RFC1    |
| 13704 | 3.496037 | 0 | 0.286038 | 0 | 1 | 4 FALSE | RIOK2   |
| 13706 | 3.496037 | 0 | 0.286038 | 0 | 1 | 4 FALSE | RIPK4   |
| 13710 | 3.496037 | 0 | 0.286038 | 0 | 1 | 4 FALSE | RMI1    |
| 13712 | 3.496037 | 0 | 0.286038 | 0 | 1 | 4 FALSE | RNASE1  |
| 13714 | 3.496037 | 0 | 0.286038 | 0 | 1 | 4 FALSE | RNASE4  |
| 13720 | 3.496037 | 0 | 0.286038 | 0 | 1 | 4 FALSE | RNF114  |
| 13724 | 3.496037 | 0 | 0.286038 | 0 | 1 | 4 FALSE | RNF152  |
| 13726 | 3.496037 | 0 | 0.286038 | 0 | 1 | 4 FALSE | RNF19A  |
| 13732 | 3.496037 | 0 | 0.286038 | 0 | 1 | 4 FALSE | RNF219  |
| 13744 | 3.496037 | 0 | 0.286038 | 0 | 1 | 4 FALSE | RPL17   |
| 13750 | 3.496037 | 0 | 0.286038 | 0 | 1 | 4 FALSE | RPRD1A  |
| 13752 | 3.496037 | 0 | 0.286038 | 0 | 1 | 4 FALSE | RPRD1B  |
| 13754 | 3.496037 | 0 | 0.286038 | 0 | 1 | 4 FALSE | RPS20   |
| 13766 | 3.496037 | 0 | 0.286038 | 0 | 1 | 4 FALSE | RRM2    |
| 13772 | 3.496037 | 0 | 0.286038 | 0 | 1 | 4 FALSE | RUNX1   |
| 13780 | 3.496037 | 0 | 0.286038 | 0 | 1 | 4 FALSE | SAMSN1  |
| 13784 | 3.496037 | 0 | 0.286038 | 0 | 1 | 4 FALSE | SCAI    |
| 13786 | 3.496037 | 0 | 0.286038 | 0 | 1 | 4 FALSE | SCAMP1  |
| 13788 | 3.496037 | 0 | 0.286038 | 0 | 1 | 4 FALSE | SCAP    |
| 13792 | 3.496037 | 0 | 0.286038 | 0 | 1 | 4 FALSE | SCFD2   |
| 13796 | 3.496037 | 0 | 0.286038 | 0 | 1 | 4 FALSE | SCYL2   |
| 13802 | 3.496037 | 0 | 0.286038 | 0 | 1 | 4 FALSE | SEC16A  |

|       |          |          |          |   |     |   |       |       |            |
|-------|----------|----------|----------|---|-----|---|-------|-------|------------|
| 13804 | 3.496037 | 0        | 0.286038 | 0 | 1   | 4 | FALSE |       | SEC23A     |
| 13806 | 3.496037 | 0        | 0.286038 | 0 | 1   | 4 | FALSE |       | SEC24A     |
| 13812 | 3.496037 | 0        | 0.286038 | 0 | 1   | 4 | FALSE |       | SEMA3C     |
| 13814 | 3.496037 | 0        | 0.286038 | 0 | 1   | 4 | FALSE |       | SENP6      |
| 13828 | 3.496037 | 0        | 0.286038 | 0 | 1   | 4 | FALSE |       | SFPQ       |
| 13834 | 3.496037 | 0        | 0.286038 | 0 | 1   | 4 | FALSE |       | SGOL2      |
| 13840 | 3.496037 | 0        | 0.286038 | 0 | 1   | 4 | FALSE |       | SHANK2     |
| 13850 | 3.496037 | 0        | 0.286038 | 0 | 1   | 4 | FALSE |       | SKOR1      |
| 13852 | 3.496037 | 0        | 0.286038 | 0 | 1   | 4 | FALSE |       | SKP2       |
| 13854 | 3.496037 | 0        | 0.286038 | 0 | 1   | 4 | FALSE |       | SLAIN2     |
| 13858 | 3.496037 | 0        | 0.286038 | 0 | 1   | 4 | FALSE |       | SLC16A1    |
| 13862 | 3.496037 | 0        | 0.286038 | 0 | 1   | 4 | FALSE |       | SLC1A1     |
| 13866 | 3.496037 | 0        | 0.286038 | 0 | 1   | 4 | FALSE |       | SLC20A2    |
| 13868 | 3.496037 | 0        | 0.286038 | 0 | 1   | 4 | FALSE |       | SLC22A23   |
| 13872 | 3.496037 | 0        | 0.286038 | 0 | 1   | 4 | FALSE |       | SLC25A3    |
| 13876 | 3.496037 | 0        | 0.286038 | 0 | 1   | 4 | FALSE |       | SLC29A2    |
| 13878 | 3.496037 | 0        | 0.286038 | 0 | 1   | 4 | FALSE |       | SLC30A5    |
| 13880 | 3.496037 | 0        | 0.286038 | 0 | 1   | 4 | FALSE |       | SLC35F5    |
| 13888 | 3.496037 | 0        | 0.286038 | 0 | 1   | 4 | FALSE |       | SLC39A14   |
| 13890 | 3.496037 | 0        | 0.286038 | 0 | 1   | 4 | FALSE |       | SLC39A6    |
| 13892 | 3.496037 | 0        | 0.286038 | 0 | 1   | 4 | FALSE |       | SLC44A1    |
| 13894 | 3.496037 | 0        | 0.286038 | 0 | 1   | 4 | FALSE |       | SLC4A4     |
| 13898 | 3.496037 | 0        | 0.286038 | 0 | 1   | 4 | FALSE |       | SLC7A2     |
| 13902 | 3.496037 | 0        | 0.286038 | 0 | 1   | 4 | FALSE |       | SLMO2      |
| 17034 | 2.960369 | 0.017283 | 0.337796 | 0 | 121 | 5 | FALSE | miRNA | hsa-miR-14 |
| 13908 | 3.496037 | 0        | 0.286038 | 0 | 1   | 4 | FALSE |       | SMAD7      |
| 13910 | 3.496037 | 0        | 0.286038 | 0 | 1   | 4 | FALSE |       | SMAD9      |
| 13914 | 3.496037 | 0        | 0.286038 | 0 | 1   | 4 | FALSE |       | SMARCD1    |
| 13916 | 3.496037 | 0        | 0.286038 | 0 | 1   | 4 | FALSE |       | SMC3       |
| 13926 | 3.496037 | 0        | 0.286038 | 0 | 1   | 4 | FALSE |       | SMN2       |
| 13930 | 3.496037 | 0        | 0.286038 | 0 | 1   | 4 | FALSE |       | SNHG1      |
| 13932 | 3.496037 | 0        | 0.286038 | 0 | 1   | 4 | FALSE |       | SNN        |
| 13936 | 3.496037 | 0        | 0.286038 | 0 | 1   | 4 | FALSE |       | SNRNP35    |
| 13938 | 3.496037 | 0        | 0.286038 | 0 | 1   | 4 | FALSE |       | SNTB2      |
| 13942 | 3.496037 | 0        | 0.286038 | 0 | 1   | 4 | FALSE |       | SNX31      |
| 13944 | 3.496037 | 0        | 0.286038 | 0 | 1   | 4 | FALSE |       | SOD1       |
| 13956 | 3.496037 | 0        | 0.286038 | 0 | 1   | 4 | FALSE |       | SP9        |
| 13958 | 3.496037 | 0        | 0.286038 | 0 | 1   | 4 | FALSE |       | SPAG1      |
| 13962 | 3.496037 | 0        | 0.286038 | 0 | 1   | 4 | FALSE |       | SPG11      |
| 13964 | 3.496037 | 0        | 0.286038 | 0 | 1   | 4 | FALSE |       | SPINT1     |
| 13966 | 3.496037 | 0        | 0.286038 | 0 | 1   | 4 | FALSE |       | SPIRE1     |
| 13968 | 3.496037 | 0        | 0.286038 | 0 | 1   | 4 | FALSE |       | SPOP       |
| 13970 | 3.496037 | 0        | 0.286038 | 0 | 1   | 4 | FALSE |       | SPPL2A     |
| 13972 | 3.496037 | 0        | 0.286038 | 0 | 1   | 4 | FALSE |       | SPRTN      |
| 13974 | 3.496037 | 0        | 0.286038 | 0 | 1   | 4 | FALSE |       | SQLE       |
| 13978 | 3.496037 | 0        | 0.286038 | 0 | 1   | 4 | FALSE |       | SREBF2     |
| 13980 | 3.496037 | 0        | 0.286038 | 0 | 1   | 4 | FALSE |       | SREK1IP1   |

|       |          |   |          |   |   |         |           |
|-------|----------|---|----------|---|---|---------|-----------|
| 13982 | 3.496037 | 0 | 0.286038 | 0 | 1 | 4 FALSE | SRF       |
| 13984 | 3.496037 | 0 | 0.286038 | 0 | 1 | 4 FALSE | SRP19     |
| 13986 | 3.496037 | 0 | 0.286038 | 0 | 1 | 4 FALSE | SRRT      |
| 13990 | 3.496037 | 0 | 0.286038 | 0 | 1 | 4 FALSE | SRSF10    |
| 13992 | 3.496037 | 0 | 0.286038 | 0 | 1 | 4 FALSE | SSFA2     |
| 13994 | 3.496037 | 0 | 0.286038 | 0 | 1 | 4 FALSE | SSX2IP    |
| 13998 | 3.496037 | 0 | 0.286038 | 0 | 1 | 4 FALSE | STAMBP    |
| 14002 | 3.496037 | 0 | 0.286038 | 0 | 1 | 4 FALSE | STARD4    |
| 14004 | 3.496037 | 0 | 0.286038 | 0 | 1 | 4 FALSE | STAU2     |
| 14016 | 3.496037 | 0 | 0.286038 | 0 | 1 | 4 FALSE | STX3      |
| 14022 | 3.496037 | 0 | 0.286038 | 0 | 1 | 4 FALSE | SUMO3     |
| 14026 | 3.496037 | 0 | 0.286038 | 0 | 1 | 4 FALSE | SUV39H2   |
| 14032 | 3.496037 | 0 | 0.286038 | 0 | 1 | 4 FALSE | SYNRG     |
| 14050 | 3.496037 | 0 | 0.286038 | 0 | 1 | 4 FALSE | TAPBP     |
| 14052 | 3.496037 | 0 | 0.286038 | 0 | 1 | 4 FALSE | TBC1D12   |
| 14060 | 3.496037 | 0 | 0.286038 | 0 | 1 | 4 FALSE | TBX18     |
| 14064 | 3.496037 | 0 | 0.286038 | 0 | 1 | 4 FALSE | TCF19     |
| 14066 | 3.496037 | 0 | 0.286038 | 0 | 1 | 4 FALSE | TCP11L2   |
| 14068 | 3.496037 | 0 | 0.286038 | 0 | 1 | 4 FALSE | TEAD1     |
| 14070 | 3.496037 | 0 | 0.286038 | 0 | 1 | 4 FALSE | TENM3     |
| 14072 | 3.496037 | 0 | 0.286038 | 0 | 1 | 4 FALSE | TEP1      |
| 14080 | 3.496037 | 0 | 0.286038 | 0 | 1 | 4 FALSE | TFB2M     |
| 14082 | 3.496037 | 0 | 0.286038 | 0 | 1 | 4 FALSE | TFIP11    |
| 14096 | 3.496037 | 0 | 0.286038 | 0 | 1 | 4 FALSE | THAP2     |
| 14102 | 3.496037 | 0 | 0.286038 | 0 | 1 | 4 FALSE | THUMPD3   |
| 14106 | 3.496037 | 0 | 0.286038 | 0 | 1 | 4 FALSE | TIMP3     |
| 14110 | 3.496037 | 0 | 0.286038 | 0 | 1 | 4 FALSE | TLK1      |
| 14118 | 3.496037 | 0 | 0.286038 | 0 | 1 | 4 FALSE | TMED7     |
| 14120 | 3.496037 | 0 | 0.286038 | 0 | 1 | 4 FALSE | TMED7-TIC |
| 14122 | 3.496037 | 0 | 0.286038 | 0 | 1 | 4 FALSE | TMEM126I  |
| 14124 | 3.496037 | 0 | 0.286038 | 0 | 1 | 4 FALSE | TMEM161I  |
| 14128 | 3.496037 | 0 | 0.286038 | 0 | 1 | 4 FALSE | TMEM168   |
| 14130 | 3.496037 | 0 | 0.286038 | 0 | 1 | 4 FALSE | TMEM170I  |
| 14134 | 3.496037 | 0 | 0.286038 | 0 | 1 | 4 FALSE | TMEM181   |
| 14146 | 3.496037 | 0 | 0.286038 | 0 | 1 | 4 FALSE | TMEM55A   |
| 14164 | 3.496037 | 0 | 0.286038 | 0 | 1 | 4 FALSE | TNKS2     |
| 14178 | 3.496037 | 0 | 0.286038 | 0 | 1 | 4 FALSE | TOMM6     |
| 14180 | 3.496037 | 0 | 0.286038 | 0 | 1 | 4 FALSE | TOP1      |
| 14192 | 3.496037 | 0 | 0.286038 | 0 | 1 | 4 FALSE | TRERF1    |
| 14194 | 3.496037 | 0 | 0.286038 | 0 | 1 | 4 FALSE | TRIPAP1   |
| 14196 | 3.496037 | 0 | 0.286038 | 0 | 1 | 4 FALSE | TRIB1     |
| 14198 | 3.496037 | 0 | 0.286038 | 0 | 1 | 4 FALSE | TRIM25    |
| 14208 | 3.496037 | 0 | 0.286038 | 0 | 1 | 4 FALSE | TRIQK     |
| 14212 | 3.496037 | 0 | 0.286038 | 0 | 1 | 4 FALSE | TSC22D2   |
| 14214 | 3.496037 | 0 | 0.286038 | 0 | 1 | 4 FALSE | TSHZ2     |
| 14226 | 3.496037 | 0 | 0.286038 | 0 | 1 | 4 FALSE | TSPYL4    |
| 14228 | 3.496037 | 0 | 0.286038 | 0 | 1 | 4 FALSE | TST       |

|       |          |          |          |   |     |   |       |       |            |
|-------|----------|----------|----------|---|-----|---|-------|-------|------------|
| 14230 | 3.496037 | 0        | 0.286038 | 0 | 1   | 4 | FALSE |       | TTC37      |
| 14240 | 3.496037 | 0        | 0.286038 | 0 | 1   | 4 | FALSE |       | TVP23B     |
| 14252 | 3.496037 | 0        | 0.286038 | 0 | 1   | 4 | FALSE |       | UBE2B      |
| 14254 | 3.496037 | 0        | 0.286038 | 0 | 1   | 4 | FALSE |       | UBE2D1     |
| 14262 | 3.496037 | 0        | 0.286038 | 0 | 1   | 4 | FALSE |       | UBE2F      |
| 14266 | 3.496037 | 0        | 0.286038 | 0 | 1   | 4 | FALSE |       | UBE2O      |
| 14270 | 3.496037 | 0        | 0.286038 | 0 | 1   | 4 | FALSE |       | UBE3C      |
| 14274 | 3.496037 | 0        | 0.286038 | 0 | 1   | 4 | FALSE |       | UBP1       |
| 14278 | 3.496037 | 0        | 0.286038 | 0 | 1   | 4 | FALSE |       | UBR4       |
| 14280 | 3.496037 | 0        | 0.286038 | 0 | 1   | 4 | FALSE |       | UBTD2      |
| 14286 | 3.496037 | 0        | 0.286038 | 0 | 1   | 4 | FALSE |       | UGT2A1     |
| 17236 | 2.759078 | 0.134473 | 0.36244  | 0 | 645 | 3 | FALSE | miRNA | hsa-miR-14 |
| 14288 | 3.496037 | 0        | 0.286038 | 0 | 1   | 4 | FALSE |       | UGT2A2     |
| 14292 | 3.496037 | 0        | 0.286038 | 0 | 1   | 4 | FALSE |       | URB2       |
| 14294 | 3.496037 | 0        | 0.286038 | 0 | 1   | 4 | FALSE |       | URI1       |
| 14296 | 3.496037 | 0        | 0.286038 | 0 | 1   | 4 | FALSE |       | USH2A      |
| 14300 | 3.496037 | 0        | 0.286038 | 0 | 1   | 4 | FALSE |       | USP25      |
| 14312 | 3.496037 | 0        | 0.286038 | 0 | 1   | 4 | FALSE |       | USP47      |
| 14314 | 3.496037 | 0        | 0.286038 | 0 | 1   | 4 | FALSE |       | USP7       |
| 14336 | 3.496037 | 0        | 0.286038 | 0 | 1   | 4 | FALSE |       | VHL        |
| 14342 | 3.496037 | 0        | 0.286038 | 0 | 1   | 4 | FALSE |       | WAPAL      |
| 14352 | 3.496037 | 0        | 0.286038 | 0 | 1   | 4 | FALSE |       | WNT7A      |
| 14360 | 3.496037 | 0        | 0.286038 | 0 | 1   | 4 | FALSE |       | XPO7       |
| 14362 | 3.496037 | 0        | 0.286038 | 0 | 1   | 4 | FALSE |       | XRCC5      |
| 14366 | 3.496037 | 0        | 0.286038 | 0 | 1   | 4 | FALSE |       | YAP1       |
| 14376 | 3.496037 | 0        | 0.286038 | 0 | 1   | 4 | FALSE |       | ZBTB1      |
| 14380 | 3.496037 | 0        | 0.286038 | 0 | 1   | 4 | FALSE |       | ZBTB21     |
| 14386 | 3.496037 | 0        | 0.286038 | 0 | 1   | 4 | FALSE |       | ZBTB43     |
| 14388 | 3.496037 | 0        | 0.286038 | 0 | 1   | 4 | FALSE |       | ZBTB5      |
| 14394 | 3.496037 | 0        | 0.286038 | 0 | 1   | 4 | FALSE |       | ZC3H4      |
| 14404 | 3.496037 | 0        | 0.286038 | 0 | 1   | 4 | FALSE |       | ZDHHC4     |
| 14414 | 3.496037 | 0        | 0.286038 | 0 | 1   | 4 | FALSE |       | ZFHX4      |
| 14418 | 3.496037 | 0        | 0.286038 | 0 | 1   | 4 | FALSE |       | ZFP41      |
| 14420 | 3.496037 | 0        | 0.286038 | 0 | 1   | 4 | FALSE |       | ZFP64      |
| 14422 | 3.496037 | 0        | 0.286038 | 0 | 1   | 4 | FALSE |       | ZFP82      |
| 14426 | 3.496037 | 0        | 0.286038 | 0 | 1   | 4 | FALSE |       | ZFX        |
| 14428 | 3.496037 | 0        | 0.286038 | 0 | 1   | 4 | FALSE |       | ZFYVE21    |
| 14432 | 3.496037 | 0        | 0.286038 | 0 | 1   | 4 | FALSE |       | ZKSCAN8    |
| 14442 | 3.496037 | 0        | 0.286038 | 0 | 1   | 4 | FALSE |       | ZNF124     |
| 14444 | 3.496037 | 0        | 0.286038 | 0 | 1   | 4 | FALSE |       | ZNF143     |
| 14450 | 3.496037 | 0        | 0.286038 | 0 | 1   | 4 | FALSE |       | ZNF207     |
| 14454 | 3.496037 | 0        | 0.286038 | 0 | 1   | 4 | FALSE |       | ZNF223     |
| 14462 | 3.496037 | 0        | 0.286038 | 0 | 1   | 4 | FALSE |       | ZNF283     |
| 14464 | 3.496037 | 0        | 0.286038 | 0 | 1   | 4 | FALSE |       | ZNF284     |
| 14468 | 3.496037 | 0        | 0.286038 | 0 | 1   | 4 | FALSE |       | ZNF350     |
| 14478 | 3.496037 | 0        | 0.286038 | 0 | 1   | 4 | FALSE |       | ZNF480     |
| 14482 | 3.496037 | 0        | 0.286038 | 0 | 1   | 4 | FALSE |       | ZNF507     |

|       |          |   |          |   |   |         |           |
|-------|----------|---|----------|---|---|---------|-----------|
| 14484 | 3.496037 | 0 | 0.286038 | 0 | 1 | 4 FALSE | ZNF512B   |
| 14486 | 3.496037 | 0 | 0.286038 | 0 | 1 | 4 FALSE | ZNF561-AS |
| 14490 | 3.496037 | 0 | 0.286038 | 0 | 1 | 4 FALSE | ZNF585A   |
| 14496 | 3.496037 | 0 | 0.286038 | 0 | 1 | 4 FALSE | ZNF645    |
| 14498 | 3.496037 | 0 | 0.286038 | 0 | 1 | 4 FALSE | ZNF649    |
| 14504 | 3.496037 | 0 | 0.286038 | 0 | 1 | 4 FALSE | ZNF664    |
| 14506 | 3.496037 | 0 | 0.286038 | 0 | 1 | 4 FALSE | ZNF675    |
| 14510 | 3.496037 | 0 | 0.286038 | 0 | 1 | 4 FALSE | ZNF687    |
| 14512 | 3.496037 | 0 | 0.286038 | 0 | 1 | 4 FALSE | ZNF714    |
| 14514 | 3.496037 | 0 | 0.286038 | 0 | 1 | 4 FALSE | ZNF740    |
| 14516 | 3.496037 | 0 | 0.286038 | 0 | 1 | 4 FALSE | ZNF746    |
| 14518 | 3.496037 | 0 | 0.286038 | 0 | 1 | 4 FALSE | ZNF778    |
| 14520 | 3.496037 | 0 | 0.286038 | 0 | 1 | 4 FALSE | ZNF792    |
| 14526 | 3.496037 | 0 | 0.286038 | 0 | 1 | 4 FALSE | ZNF850    |
| 14528 | 3.496037 | 0 | 0.286038 | 0 | 1 | 4 FALSE | ZNRF2     |
| 14532 | 3.496037 | 0 | 0.286038 | 0 | 1 | 4 FALSE | ZSCAN9    |
| 14537 | 3.806452 | 0 | 0.262712 | 0 | 1 | 4 FALSE | A1BG      |
| 14543 | 3.806452 | 0 | 0.262712 | 0 | 1 | 4 FALSE | ABCF3     |
| 14547 | 3.806452 | 0 | 0.262712 | 0 | 1 | 4 FALSE | ACACB     |
| 14549 | 3.806452 | 0 | 0.262712 | 0 | 1 | 4 FALSE | AFF3      |
| 14552 | 3.806452 | 0 | 0.262712 | 0 | 1 | 4 FALSE | AHSA2     |
| 14554 | 3.806452 | 0 | 0.262712 | 0 | 1 | 4 FALSE | ALDH1B1   |
| 14556 | 3.806452 | 0 | 0.262712 | 0 | 1 | 4 FALSE | ALDH5A1   |
| 14565 | 3.806452 | 0 | 0.262712 | 0 | 1 | 4 FALSE | AMER3     |
| 14567 | 3.806452 | 0 | 0.262712 | 0 | 1 | 4 FALSE | ANGPT4    |
| 14571 | 3.806452 | 0 | 0.262712 | 0 | 1 | 4 FALSE | APOC3     |
| 14573 | 3.806452 | 0 | 0.262712 | 0 | 1 | 4 FALSE | AQP6      |
| 14577 | 3.806452 | 0 | 0.262712 | 0 | 1 | 4 FALSE | ARFIP2    |
| 14586 | 3.806452 | 0 | 0.262712 | 0 | 1 | 4 FALSE | ATAT1     |
| 14588 | 3.806452 | 0 | 0.262712 | 0 | 1 | 4 FALSE | ATG2A     |
| 14591 | 3.806452 | 0 | 0.262712 | 0 | 1 | 4 FALSE | ATP13A4   |
| 14595 | 3.806452 | 0 | 0.262712 | 0 | 1 | 4 FALSE | ATP8B3    |
| 14597 | 3.806452 | 0 | 0.262712 | 0 | 1 | 4 FALSE | ATXN2     |
| 14601 | 3.806452 | 0 | 0.262712 | 0 | 1 | 4 FALSE | AVPR1A    |
| 14603 | 3.806452 | 0 | 0.262712 | 0 | 1 | 4 FALSE | BASP1     |
| 14605 | 3.806452 | 0 | 0.262712 | 0 | 1 | 4 FALSE | BBS5      |
| 14611 | 3.806452 | 0 | 0.262712 | 0 | 1 | 4 FALSE | BTLA      |
| 14619 | 3.806452 | 0 | 0.262712 | 0 | 1 | 4 FALSE | C17orf75  |
| 14623 | 3.806452 | 0 | 0.262712 | 0 | 1 | 4 FALSE | C2orf49   |
| 14627 | 3.806452 | 0 | 0.262712 | 0 | 1 | 4 FALSE | C5AR2     |
| 14629 | 3.806452 | 0 | 0.262712 | 0 | 1 | 4 FALSE | C6orf141  |
| 14631 | 3.806452 | 0 | 0.262712 | 0 | 1 | 4 FALSE | CA5B      |
| 14633 | 3.806452 | 0 | 0.262712 | 0 | 1 | 4 FALSE | CA6       |
| 14637 | 3.806452 | 0 | 0.262712 | 0 | 1 | 4 FALSE | CAD       |
| 14639 | 3.806452 | 0 | 0.262712 | 0 | 1 | 4 FALSE | CALCOCO2  |
| 14641 | 3.806452 | 0 | 0.262712 | 0 | 1 | 4 FALSE | CAMK2G    |
| 14643 | 3.806452 | 0 | 0.262712 | 0 | 1 | 4 FALSE | CAMK4     |



|       |          |   |          |   |   |         |          |
|-------|----------|---|----------|---|---|---------|----------|
| 14645 | 3.806452 | 0 | 0.262712 | 0 | 1 | 4 FALSE | CASS4    |
| 14647 | 3.806452 | 0 | 0.262712 | 0 | 1 | 4 FALSE | CASTOR2  |
| 14651 | 3.806452 | 0 | 0.262712 | 0 | 1 | 4 FALSE | CCDC141  |
| 14655 | 3.806452 | 0 | 0.262712 | 0 | 1 | 4 FALSE | CCDC8    |
| 14662 | 3.806452 | 0 | 0.262712 | 0 | 1 | 4 FALSE | CCT4     |
| 14670 | 3.806452 | 0 | 0.262712 | 0 | 1 | 4 FALSE | CD96     |
| 14673 | 3.806452 | 0 | 0.262712 | 0 | 1 | 4 FALSE | CDKL2    |
| 14675 | 3.806452 | 0 | 0.262712 | 0 | 1 | 4 FALSE | CDNF     |
| 14679 | 3.806452 | 0 | 0.262712 | 0 | 1 | 4 FALSE | CHAF1B   |
| 14682 | 3.806452 | 0 | 0.262712 | 0 | 1 | 4 FALSE | CHP1     |
| 14684 | 3.806452 | 0 | 0.262712 | 0 | 1 | 4 FALSE | CHST4    |
| 14686 | 3.806452 | 0 | 0.262712 | 0 | 1 | 4 FALSE | CHST6    |
| 14692 | 3.806452 | 0 | 0.262712 | 0 | 1 | 4 FALSE | CLPX     |
| 14696 | 3.806452 | 0 | 0.262712 | 0 | 1 | 4 FALSE | CNKS3    |
| 14698 | 3.806452 | 0 | 0.262712 | 0 | 1 | 4 FALSE | COL4A3BP |
| 14700 | 3.806452 | 0 | 0.262712 | 0 | 1 | 4 FALSE | COL9A2   |
| 14702 | 3.806452 | 0 | 0.262712 | 0 | 1 | 4 FALSE | COLCA1   |
| 14708 | 3.806452 | 0 | 0.262712 | 0 | 1 | 4 FALSE | CRISPLD2 |
| 14710 | 3.806452 | 0 | 0.262712 | 0 | 1 | 4 FALSE | CRKL     |
| 14712 | 3.806452 | 0 | 0.262712 | 0 | 1 | 4 FALSE | CRP      |
| 14716 | 3.806452 | 0 | 0.262712 | 0 | 1 | 4 FALSE | CXorf38  |
| 14718 | 3.806452 | 0 | 0.262712 | 0 | 1 | 4 FALSE | CYP1A2   |
| 14721 | 3.806452 | 0 | 0.262712 | 0 | 1 | 4 FALSE | CYP4F3   |
| 14723 | 3.806452 | 0 | 0.262712 | 0 | 1 | 4 FALSE | DCPS     |
| 14726 | 3.806452 | 0 | 0.262712 | 0 | 1 | 4 FALSE | DDX52    |
| 14728 | 3.806452 | 0 | 0.262712 | 0 | 1 | 4 FALSE | DEFB105A |
| 14730 | 3.806452 | 0 | 0.262712 | 0 | 1 | 4 FALSE | DEFB105B |
| 14732 | 3.806452 | 0 | 0.262712 | 0 | 1 | 4 FALSE | DMKN     |
| 14734 | 3.806452 | 0 | 0.262712 | 0 | 1 | 4 FALSE | DMRT2    |
| 14736 | 3.806452 | 0 | 0.262712 | 0 | 1 | 4 FALSE | DMTF1    |
| 14738 | 3.806452 | 0 | 0.262712 | 0 | 1 | 4 FALSE | DNA2     |
| 14742 | 3.806452 | 0 | 0.262712 | 0 | 1 | 4 FALSE | DNAJC16  |
| 14747 | 3.806452 | 0 | 0.262712 | 0 | 1 | 4 FALSE | DOCK7    |
| 14751 | 3.806452 | 0 | 0.262712 | 0 | 1 | 4 FALSE | DTX3L    |
| 14755 | 3.806452 | 0 | 0.262712 | 0 | 1 | 4 FALSE | EEF2K    |
| 14761 | 3.806452 | 0 | 0.262712 | 0 | 1 | 4 FALSE | EIF5A2   |
| 14765 | 3.806452 | 0 | 0.262712 | 0 | 1 | 4 FALSE | EMC1     |
| 14777 | 3.806452 | 0 | 0.262712 | 0 | 1 | 4 FALSE | F2RL3    |
| 14779 | 3.806452 | 0 | 0.262712 | 0 | 1 | 4 FALSE | FAHD1    |
| 14781 | 3.806452 | 0 | 0.262712 | 0 | 1 | 4 FALSE | FAM163A  |
| 14783 | 3.806452 | 0 | 0.262712 | 0 | 1 | 4 FALSE | FAM234B  |
| 14787 | 3.806452 | 0 | 0.262712 | 0 | 1 | 4 FALSE | FAM27E2  |
| 14791 | 3.806452 | 0 | 0.262712 | 0 | 1 | 4 FALSE | FBXL20   |
| 14793 | 3.806452 | 0 | 0.262712 | 0 | 1 | 4 FALSE | FBXO47   |
| 14795 | 3.806452 | 0 | 0.262712 | 0 | 1 | 4 FALSE | FCRL2    |
| 14797 | 3.806452 | 0 | 0.262712 | 0 | 1 | 4 FALSE | FFAR4    |
| 14799 | 3.806452 | 0 | 0.262712 | 0 | 1 | 4 FALSE | FHL2     |

|       |          |   |          |   |   |         |           |
|-------|----------|---|----------|---|---|---------|-----------|
| 14801 | 3.806452 | 0 | 0.262712 | 0 | 1 | 4 FALSE | FOPNL     |
| 14803 | 3.806452 | 0 | 0.262712 | 0 | 1 | 4 FALSE | FOXL2NB   |
| 14805 | 3.806452 | 0 | 0.262712 | 0 | 1 | 4 FALSE | FRMD8     |
| 14809 | 3.806452 | 0 | 0.262712 | 0 | 1 | 4 FALSE | FUT1      |
| 14812 | 3.806452 | 0 | 0.262712 | 0 | 1 | 4 FALSE | FUT9      |
| 14814 | 3.806452 | 0 | 0.262712 | 0 | 1 | 4 FALSE | GABPB1    |
| 14819 | 3.806452 | 0 | 0.262712 | 0 | 1 | 4 FALSE | GINM1     |
| 14831 | 3.806452 | 0 | 0.262712 | 0 | 1 | 4 FALSE | GMPR      |
| 14837 | 3.806452 | 0 | 0.262712 | 0 | 1 | 4 FALSE | GON7      |
| 14839 | 3.806452 | 0 | 0.262712 | 0 | 1 | 4 FALSE | GOSR1     |
| 14843 | 3.806452 | 0 | 0.262712 | 0 | 1 | 4 FALSE | GPR75     |
| 14847 | 3.806452 | 0 | 0.262712 | 0 | 1 | 4 FALSE | HACE1     |
| 14851 | 3.806452 | 0 | 0.262712 | 0 | 1 | 4 FALSE | HCAR1     |
| 14853 | 3.806452 | 0 | 0.262712 | 0 | 1 | 4 FALSE | HEPHL1    |
| 14855 | 3.806452 | 0 | 0.262712 | 0 | 1 | 4 FALSE | HINFP     |
| 14861 | 3.806452 | 0 | 0.262712 | 0 | 1 | 4 FALSE | HIST1H2BN |
| 14863 | 3.806452 | 0 | 0.262712 | 0 | 1 | 4 FALSE | HMX3      |
| 14867 | 3.806452 | 0 | 0.262712 | 0 | 1 | 4 FALSE | HSBP1     |
| 14871 | 3.806452 | 0 | 0.262712 | 0 | 1 | 4 FALSE | HTR5A-AS1 |
| 14879 | 3.806452 | 0 | 0.262712 | 0 | 1 | 4 FALSE | IMP4      |
| 14881 | 3.806452 | 0 | 0.262712 | 0 | 1 | 4 FALSE | IMPACT    |
| 14883 | 3.806452 | 0 | 0.262712 | 0 | 1 | 4 FALSE | IPP       |
| 14885 | 3.806452 | 0 | 0.262712 | 0 | 1 | 4 FALSE | IRAK1BP1  |
| 14892 | 3.806452 | 0 | 0.262712 | 0 | 1 | 4 FALSE | JAK3      |
| 14894 | 3.806452 | 0 | 0.262712 | 0 | 1 | 4 FALSE | KANSL3    |
| 14898 | 3.806452 | 0 | 0.262712 | 0 | 1 | 4 FALSE | KCNN3     |
| 14902 | 3.806452 | 0 | 0.262712 | 0 | 1 | 4 FALSE | KIAA1210  |
| 14912 | 3.806452 | 0 | 0.262712 | 0 | 1 | 4 FALSE | KLHDC8A   |
| 14916 | 3.806452 | 0 | 0.262712 | 0 | 1 | 4 FALSE | KLLN      |
| 14918 | 3.806452 | 0 | 0.262712 | 0 | 1 | 4 FALSE | KNSTRN    |
| 14920 | 3.806452 | 0 | 0.262712 | 0 | 1 | 4 FALSE | KRTAP21-2 |
| 14922 | 3.806452 | 0 | 0.262712 | 0 | 1 | 4 FALSE | LAIR1     |
| 14924 | 3.806452 | 0 | 0.262712 | 0 | 1 | 4 FALSE | LAMC3     |
| 14927 | 3.806452 | 0 | 0.262712 | 0 | 1 | 4 FALSE | LETM1     |
| 14929 | 3.806452 | 0 | 0.262712 | 0 | 1 | 4 FALSE | LHPP      |
| 14933 | 3.806452 | 0 | 0.262712 | 0 | 1 | 4 FALSE | LIPH      |
| 14942 | 3.806452 | 0 | 0.262712 | 0 | 1 | 4 FALSE | LRRD1     |
| 14944 | 3.806452 | 0 | 0.262712 | 0 | 1 | 4 FALSE | LRTOMT    |
| 14946 | 3.806452 | 0 | 0.262712 | 0 | 1 | 4 FALSE | LTA       |
| 14950 | 3.806452 | 0 | 0.262712 | 0 | 1 | 4 FALSE | LYZ       |
| 14952 | 3.806452 | 0 | 0.262712 | 0 | 1 | 4 FALSE | MAGI3     |
| 14961 | 3.806452 | 0 | 0.262712 | 0 | 1 | 4 FALSE | ME2       |
| 14964 | 3.806452 | 0 | 0.262712 | 0 | 1 | 4 FALSE | MED18     |
| 14966 | 3.806452 | 0 | 0.262712 | 0 | 1 | 4 FALSE | MED29     |
| 14968 | 3.806452 | 0 | 0.262712 | 0 | 1 | 4 FALSE | MEIOC     |
| 14970 | 3.806452 | 0 | 0.262712 | 0 | 1 | 4 FALSE | MELK      |
| 14972 | 3.806452 | 0 | 0.262712 | 0 | 1 | 4 FALSE | METTL8    |

|       |          |   |          |   |   |         |          |
|-------|----------|---|----------|---|---|---------|----------|
| 14974 | 3.806452 | 0 | 0.262712 | 0 | 1 | 4 FALSE | MEX3A    |
| 14976 | 3.806452 | 0 | 0.262712 | 0 | 1 | 4 FALSE | MFSD14C  |
| 14984 | 3.806452 | 0 | 0.262712 | 0 | 1 | 4 FALSE | MINDY2   |
| 14995 | 3.806452 | 0 | 0.262712 | 0 | 1 | 4 FALSE | MRI1     |
| 14997 | 3.806452 | 0 | 0.262712 | 0 | 1 | 4 FALSE | MRM3     |
| 15003 | 3.806452 | 0 | 0.262712 | 0 | 1 | 4 FALSE | MSX2     |
| 15007 | 3.806452 | 0 | 0.262712 | 0 | 1 | 4 FALSE | MTHFD1L  |
| 15011 | 3.806452 | 0 | 0.262712 | 0 | 1 | 4 FALSE | MUC21    |
| 15015 | 3.806452 | 0 | 0.262712 | 0 | 1 | 4 FALSE | MYDGF    |
| 15017 | 3.806452 | 0 | 0.262712 | 0 | 1 | 4 FALSE | MYLK3    |
| 15023 | 3.806452 | 0 | 0.262712 | 0 | 1 | 4 FALSE | NDUFC2   |
| 15025 | 3.806452 | 0 | 0.262712 | 0 | 1 | 4 FALSE | NEK8     |
| 15031 | 3.806452 | 0 | 0.262712 | 0 | 1 | 4 FALSE | NIPAL1   |
| 15033 | 3.806452 | 0 | 0.262712 | 0 | 1 | 4 FALSE | NLRP9    |
| 15035 | 3.806452 | 0 | 0.262712 | 0 | 1 | 4 FALSE | NME1-NMI |
| 15039 | 3.806452 | 0 | 0.262712 | 0 | 1 | 4 FALSE | NOS1AP   |
| 15041 | 3.806452 | 0 | 0.262712 | 0 | 1 | 4 FALSE | NOX5     |
| 15043 | 3.806452 | 0 | 0.262712 | 0 | 1 | 4 FALSE | NPAS1    |
| 15046 | 3.806452 | 0 | 0.262712 | 0 | 1 | 4 FALSE | NRXN3    |
| 15048 | 3.806452 | 0 | 0.262712 | 0 | 1 | 4 FALSE | NUDT16   |
| 15054 | 3.806452 | 0 | 0.262712 | 0 | 1 | 4 FALSE | NUP93    |
| 15059 | 3.806452 | 0 | 0.262712 | 0 | 1 | 4 FALSE | OCIAD1   |
| 15061 | 3.806452 | 0 | 0.262712 | 0 | 1 | 4 FALSE | OCIAD2   |
| 15065 | 3.806452 | 0 | 0.262712 | 0 | 1 | 4 FALSE | OR51E2   |
| 15070 | 3.806452 | 0 | 0.262712 | 0 | 1 | 4 FALSE | ORC6     |
| 15079 | 3.806452 | 0 | 0.262712 | 0 | 1 | 4 FALSE | PCLAF    |
| 15085 | 3.806452 | 0 | 0.262712 | 0 | 1 | 4 FALSE | PDE12    |
| 15087 | 3.806452 | 0 | 0.262712 | 0 | 1 | 4 FALSE | PKD3     |
| 15091 | 3.806452 | 0 | 0.262712 | 0 | 1 | 4 FALSE | PGM3     |
| 15098 | 3.806452 | 0 | 0.262712 | 0 | 1 | 4 FALSE | PLEKHG2  |
| 15100 | 3.806452 | 0 | 0.262712 | 0 | 1 | 4 FALSE | PLLP     |
| 15102 | 3.806452 | 0 | 0.262712 | 0 | 1 | 4 FALSE | PLPP4    |
| 15104 | 3.806452 | 0 | 0.262712 | 0 | 1 | 4 FALSE | PNMA8B   |
| 15106 | 3.806452 | 0 | 0.262712 | 0 | 1 | 4 FALSE | POFUT2   |
| 15112 | 3.806452 | 0 | 0.262712 | 0 | 1 | 4 FALSE | POLR1A   |
| 15114 | 3.806452 | 0 | 0.262712 | 0 | 1 | 4 FALSE | PON1     |
| 15116 | 3.806452 | 0 | 0.262712 | 0 | 1 | 4 FALSE | POU2F3   |
| 15120 | 3.806452 | 0 | 0.262712 | 0 | 1 | 4 FALSE | PPIL6    |
| 15122 | 3.806452 | 0 | 0.262712 | 0 | 1 | 4 FALSE | PPM1K    |
| 15126 | 3.806452 | 0 | 0.262712 | 0 | 1 | 4 FALSE | PRND     |
| 15128 | 3.806452 | 0 | 0.262712 | 0 | 1 | 4 FALSE | PRPF4    |
| 15132 | 3.806452 | 0 | 0.262712 | 0 | 1 | 4 FALSE | PRR12    |
| 15140 | 3.806452 | 0 | 0.262712 | 0 | 1 | 4 FALSE | PSMD9    |
| 15142 | 3.806452 | 0 | 0.262712 | 0 | 1 | 4 FALSE | PSMG4    |
| 15144 | 3.806452 | 0 | 0.262712 | 0 | 1 | 4 FALSE | PTCHD3   |
| 15148 | 3.806452 | 0 | 0.262712 | 0 | 1 | 4 FALSE | PTK6     |
| 15150 | 3.806452 | 0 | 0.262712 | 0 | 1 | 4 FALSE | PXMP4    |

|       |          |   |          |   |   |   |       |           |
|-------|----------|---|----------|---|---|---|-------|-----------|
| 15152 | 3.806452 | 0 | 0.262712 | 0 | 1 | 4 | FALSE | QPCT      |
| 15154 | 3.806452 | 0 | 0.262712 | 0 | 1 | 4 | FALSE | QPCTL     |
| 15156 | 3.806452 | 0 | 0.262712 | 0 | 1 | 4 | FALSE | RAB11B    |
| 15161 | 3.806452 | 0 | 0.262712 | 0 | 1 | 4 | FALSE | RAD51L3-R |
| 15172 | 3.806452 | 0 | 0.262712 | 0 | 1 | 4 | FALSE | REPS1     |
| 15174 | 3.806452 | 0 | 0.262712 | 0 | 1 | 4 | FALSE | RFFL      |
| 15178 | 3.806452 | 0 | 0.262712 | 0 | 1 | 4 | FALSE | RHNO1     |
| 15182 | 3.806452 | 0 | 0.262712 | 0 | 1 | 4 | FALSE | RILPL1    |
| 15184 | 3.806452 | 0 | 0.262712 | 0 | 1 | 4 | FALSE | RNASEH2B  |
| 15187 | 3.806452 | 0 | 0.262712 | 0 | 1 | 4 | FALSE | RNF115    |
| 15189 | 3.806452 | 0 | 0.262712 | 0 | 1 | 4 | FALSE | RPL12     |
| 15194 | 3.806452 | 0 | 0.262712 | 0 | 1 | 4 | FALSE | RPRD2     |
| 15198 | 3.806452 | 0 | 0.262712 | 0 | 1 | 4 | FALSE | RPTN      |
| 15200 | 3.806452 | 0 | 0.262712 | 0 | 1 | 4 | FALSE | RSRC1     |
| 15204 | 3.806452 | 0 | 0.262712 | 0 | 1 | 4 | FALSE | SC5D      |
| 15208 | 3.806452 | 0 | 0.262712 | 0 | 1 | 4 | FALSE | SDHAF1    |
| 15214 | 3.806452 | 0 | 0.262712 | 0 | 1 | 4 | FALSE | SERPING1  |
| 15222 | 3.806452 | 0 | 0.262712 | 0 | 1 | 4 | FALSE | SIAE      |
| 15228 | 3.806452 | 0 | 0.262712 | 0 | 1 | 4 | FALSE | SLC16A4   |
| 15231 | 3.806452 | 0 | 0.262712 | 0 | 1 | 4 | FALSE | SLC24A4   |
| 15233 | 3.806452 | 0 | 0.262712 | 0 | 1 | 4 | FALSE | SLC25A15  |
| 15239 | 3.806452 | 0 | 0.262712 | 0 | 1 | 4 | FALSE | SLC35E2   |
| 15243 | 3.806452 | 0 | 0.262712 | 0 | 1 | 4 | FALSE | SLC9A7    |
| 15245 | 3.806452 | 0 | 0.262712 | 0 | 1 | 4 | FALSE | SLFN12L   |
| 15250 | 3.806452 | 0 | 0.262712 | 0 | 1 | 4 | FALSE | SMCR8     |
| 15252 | 3.806452 | 0 | 0.262712 | 0 | 1 | 4 | FALSE | SMTNL2    |
| 15255 | 3.806452 | 0 | 0.262712 | 0 | 1 | 4 | FALSE | SNRNP48   |
| 15261 | 3.806452 | 0 | 0.262712 | 0 | 1 | 4 | FALSE | SRCIN1    |
| 15265 | 3.806452 | 0 | 0.262712 | 0 | 1 | 4 | FALSE | SRRD      |
| 15267 | 3.806452 | 0 | 0.262712 | 0 | 1 | 4 | FALSE | SRSF7     |
| 15271 | 3.806452 | 0 | 0.262712 | 0 | 1 | 4 | FALSE | SSH3      |
| 15273 | 3.806452 | 0 | 0.262712 | 0 | 1 | 4 | FALSE | SSTR2     |
| 15277 | 3.806452 | 0 | 0.262712 | 0 | 1 | 4 | FALSE | STK32A    |
| 15281 | 3.806452 | 0 | 0.262712 | 0 | 1 | 4 | FALSE | STX4      |
| 15285 | 3.806452 | 0 | 0.262712 | 0 | 1 | 4 | FALSE | SURF6     |
| 15287 | 3.806452 | 0 | 0.262712 | 0 | 1 | 4 | FALSE | SUSD5     |
| 15289 | 3.806452 | 0 | 0.262712 | 0 | 1 | 4 | FALSE | SVOP      |
| 15291 | 3.806452 | 0 | 0.262712 | 0 | 1 | 4 | FALSE | SYNJ2BP   |
| 15293 | 3.806452 | 0 | 0.262712 | 0 | 1 | 4 | FALSE | TACO1     |
| 15295 | 3.806452 | 0 | 0.262712 | 0 | 1 | 4 | FALSE | TACR2     |
| 15297 | 3.806452 | 0 | 0.262712 | 0 | 1 | 4 | FALSE | TAF11     |
| 15307 | 3.806452 | 0 | 0.262712 | 0 | 1 | 4 | FALSE | TERF2     |
| 15313 | 3.806452 | 0 | 0.262712 | 0 | 1 | 4 | FALSE | THOC2     |
| 15315 | 3.806452 | 0 | 0.262712 | 0 | 1 | 4 | FALSE | THOC5     |
| 15319 | 3.806452 | 0 | 0.262712 | 0 | 1 | 4 | FALSE | TIMM10B   |
| 15321 | 3.806452 | 0 | 0.262712 | 0 | 1 | 4 | FALSE | TIMM29    |
| 15328 | 3.806452 | 0 | 0.262712 | 0 | 1 | 4 | FALSE | TMED4     |

|       |          |   |          |   |   |         |           |
|-------|----------|---|----------|---|---|---------|-----------|
| 15332 | 3.806452 | 0 | 0.262712 | 0 | 1 | 4 FALSE | TMEM145   |
| 15334 | 3.806452 | 0 | 0.262712 | 0 | 1 | 4 FALSE | TMEM151f  |
| 15338 | 3.806452 | 0 | 0.262712 | 0 | 1 | 4 FALSE | TMEM184f  |
| 15340 | 3.806452 | 0 | 0.262712 | 0 | 1 | 4 FALSE | TMEM239   |
| 15347 | 3.806452 | 0 | 0.262712 | 0 | 1 | 4 FALSE | TNFRSF13E |
| 15352 | 3.806452 | 0 | 0.262712 | 0 | 1 | 4 FALSE | TPGS1     |
| 15356 | 3.806452 | 0 | 0.262712 | 0 | 1 | 4 FALSE | TRAF3IP1  |
| 15358 | 3.806452 | 0 | 0.262712 | 0 | 1 | 4 FALSE | TRAFD1    |
| 15362 | 3.806452 | 0 | 0.262712 | 0 | 1 | 4 FALSE | TRIM16L   |
| 15364 | 3.806452 | 0 | 0.262712 | 0 | 1 | 4 FALSE | TRIM45    |
| 15366 | 3.806452 | 0 | 0.262712 | 0 | 1 | 4 FALSE | TRIM58    |
| 15370 | 3.806452 | 0 | 0.262712 | 0 | 1 | 4 FALSE | TRIM68    |
| 15374 | 3.806452 | 0 | 0.262712 | 0 | 1 | 4 FALSE | TRNP1     |
| 15376 | 3.806452 | 0 | 0.262712 | 0 | 1 | 4 FALSE | TRPC5     |
| 15378 | 3.806452 | 0 | 0.262712 | 0 | 1 | 4 FALSE | TRPV1     |
| 15380 | 3.806452 | 0 | 0.262712 | 0 | 1 | 4 FALSE | TSPEAR-AS |
| 15382 | 3.806452 | 0 | 0.262712 | 0 | 1 | 4 FALSE | TTC39A    |
| 15384 | 3.806452 | 0 | 0.262712 | 0 | 1 | 4 FALSE | TTC39C    |
| 15386 | 3.806452 | 0 | 0.262712 | 0 | 1 | 4 FALSE | TUFT1     |
| 15392 | 3.806452 | 0 | 0.262712 | 0 | 1 | 4 FALSE | UBC       |
| 15395 | 3.806452 | 0 | 0.262712 | 0 | 1 | 4 FALSE | UBXN11    |
| 15399 | 3.806452 | 0 | 0.262712 | 0 | 1 | 4 FALSE | UGDH      |
| 15401 | 3.806452 | 0 | 0.262712 | 0 | 1 | 4 FALSE | UGGT1     |
| 15405 | 3.806452 | 0 | 0.262712 | 0 | 1 | 4 FALSE | UQCR11    |
| 15407 | 3.806452 | 0 | 0.262712 | 0 | 1 | 4 FALSE | UTP4      |
| 15409 | 3.806452 | 0 | 0.262712 | 0 | 1 | 4 FALSE | UTP6      |
| 15414 | 3.806452 | 0 | 0.262712 | 0 | 1 | 4 FALSE | VPS4A     |
| 15418 | 3.806452 | 0 | 0.262712 | 0 | 1 | 4 FALSE | VWA7      |
| 15422 | 3.806452 | 0 | 0.262712 | 0 | 1 | 4 FALSE | WT1       |
| 15427 | 3.806452 | 0 | 0.262712 | 0 | 1 | 4 FALSE | YIPF4     |
| 15433 | 3.806452 | 0 | 0.262712 | 0 | 1 | 4 FALSE | ZC3H12B   |
| 15435 | 3.806452 | 0 | 0.262712 | 0 | 1 | 4 FALSE | ZC3H7B    |
| 15438 | 3.806452 | 0 | 0.262712 | 0 | 1 | 4 FALSE | ZFAND2B   |
| 15440 | 3.806452 | 0 | 0.262712 | 0 | 1 | 4 FALSE | ZFP69B    |
| 15442 | 3.806452 | 0 | 0.262712 | 0 | 1 | 4 FALSE | ZNF101    |
| 15448 | 3.806452 | 0 | 0.262712 | 0 | 1 | 4 FALSE | ZNF221    |
| 15450 | 3.806452 | 0 | 0.262712 | 0 | 1 | 4 FALSE | ZNF234    |
| 15452 | 3.806452 | 0 | 0.262712 | 0 | 1 | 4 FALSE | ZNF275    |
| 15454 | 3.806452 | 0 | 0.262712 | 0 | 1 | 4 FALSE | ZNF286A   |
| 15456 | 3.806452 | 0 | 0.262712 | 0 | 1 | 4 FALSE | ZNF286B   |
| 15459 | 3.806452 | 0 | 0.262712 | 0 | 1 | 4 FALSE | ZNF383    |
| 15463 | 3.806452 | 0 | 0.262712 | 0 | 1 | 4 FALSE | ZNF419    |
| 15472 | 3.806452 | 0 | 0.262712 | 0 | 1 | 4 FALSE | ZNF555    |
| 15476 | 3.806452 | 0 | 0.262712 | 0 | 1 | 4 FALSE | ZNF557    |
| 15482 | 3.806452 | 0 | 0.262712 | 0 | 1 | 4 FALSE | ZNF610    |
| 15484 | 3.806452 | 0 | 0.262712 | 0 | 1 | 4 FALSE | ZNF641    |
| 15488 | 3.806452 | 0 | 0.262712 | 0 | 1 | 4 FALSE | ZNF695    |

|       |          |   |          |   |   |         |          |
|-------|----------|---|----------|---|---|---------|----------|
| 15490 | 3.806452 | 0 | 0.262712 | 0 | 1 | 4 FALSE | ZNF730   |
| 15492 | 3.806452 | 0 | 0.262712 | 0 | 1 | 4 FALSE | ZNF749   |
| 15494 | 3.806452 | 0 | 0.262712 | 0 | 1 | 4 FALSE | ZNF766   |
| 15496 | 3.806452 | 0 | 0.262712 | 0 | 1 | 4 FALSE | ZNF835   |
| 15498 | 3.806452 | 0 | 0.262712 | 0 | 1 | 4 FALSE | ZNF844   |
| 15501 | 3.806452 | 0 | 0.262712 | 0 | 1 | 4 FALSE | ZYG11A   |
| 15508 | 3.67447  | 0 | 0.272148 | 0 | 1 | 4 FALSE | AAR2     |
| 15515 | 3.67447  | 0 | 0.272148 | 0 | 1 | 4 FALSE | ABCA2    |
| 15519 | 3.67447  | 0 | 0.272148 | 0 | 1 | 4 FALSE | ABHD4    |
| 15526 | 3.67447  | 0 | 0.272148 | 0 | 1 | 4 FALSE | ACOT9    |
| 15529 | 3.67447  | 0 | 0.272148 | 0 | 1 | 4 FALSE | ADAMTS4  |
| 15531 | 3.67447  | 0 | 0.272148 | 0 | 1 | 4 FALSE | ADH5     |
| 15534 | 3.67447  | 0 | 0.272148 | 0 | 1 | 4 FALSE | AGAP1    |
| 15537 | 3.67447  | 0 | 0.272148 | 0 | 1 | 4 FALSE | AGPAT1   |
| 15541 | 3.67447  | 0 | 0.272148 | 0 | 1 | 4 FALSE | AGPAT6   |
| 15545 | 3.67447  | 0 | 0.272148 | 0 | 1 | 4 FALSE | AHR      |
| 15547 | 3.67447  | 0 | 0.272148 | 0 | 1 | 4 FALSE | AHRR     |
| 15549 | 3.67447  | 0 | 0.272148 | 0 | 1 | 4 FALSE | AIRE     |
| 15554 | 3.67447  | 0 | 0.272148 | 0 | 1 | 4 FALSE | AKR7A2   |
| 15562 | 3.67447  | 0 | 0.272148 | 0 | 1 | 4 FALSE | ALPI     |
| 15564 | 3.67447  | 0 | 0.272148 | 0 | 1 | 4 FALSE | AMER1    |
| 15566 | 3.67447  | 0 | 0.272148 | 0 | 1 | 4 FALSE | AMIGO1   |
| 15570 | 3.67447  | 0 | 0.272148 | 0 | 1 | 4 FALSE | ANKH     |
| 15572 | 3.67447  | 0 | 0.272148 | 0 | 1 | 4 FALSE | ANKLE2   |
| 15580 | 3.67447  | 0 | 0.272148 | 0 | 1 | 4 FALSE | ANKRD9   |
| 15582 | 3.67447  | 0 | 0.272148 | 0 | 1 | 4 FALSE | ANKS4B   |
| 15584 | 3.67447  | 0 | 0.272148 | 0 | 1 | 4 FALSE | ANXA11   |
| 15586 | 3.67447  | 0 | 0.272148 | 0 | 1 | 4 FALSE | AP1M1    |
| 15591 | 3.67447  | 0 | 0.272148 | 0 | 1 | 4 FALSE | AP5B1    |
| 15597 | 3.67447  | 0 | 0.272148 | 0 | 1 | 4 FALSE | APPL2    |
| 15604 | 3.67447  | 0 | 0.272148 | 0 | 1 | 4 FALSE | ARPC1B   |
| 15612 | 3.67447  | 0 | 0.272148 | 0 | 1 | 4 FALSE | ARSD     |
| 15622 | 3.67447  | 0 | 0.272148 | 0 | 1 | 4 FALSE | ATF3     |
| 15631 | 3.67447  | 0 | 0.272148 | 0 | 1 | 4 FALSE | ATXN10   |
| 15638 | 3.67447  | 0 | 0.272148 | 0 | 1 | 4 FALSE | BAG3     |
| 15640 | 3.67447  | 0 | 0.272148 | 0 | 1 | 4 FALSE | BAP1     |
| 15646 | 3.67447  | 0 | 0.272148 | 0 | 1 | 4 FALSE | BCCIP    |
| 15648 | 3.67447  | 0 | 0.272148 | 0 | 1 | 4 FALSE | Bcl-2    |
| 15662 | 3.67447  | 0 | 0.272148 | 0 | 1 | 4 FALSE | BRD2     |
| 15673 | 3.67447  | 0 | 0.272148 | 0 | 1 | 4 FALSE | C1orf61  |
| 15675 | 3.67447  | 0 | 0.272148 | 0 | 1 | 4 FALSE | C2orf15  |
| 15677 | 3.67447  | 0 | 0.272148 | 0 | 1 | 4 FALSE | C5orf38  |
| 15679 | 3.67447  | 0 | 0.272148 | 0 | 1 | 4 FALSE | C6orf106 |
| 15681 | 3.67447  | 0 | 0.272148 | 0 | 1 | 4 FALSE | C9orf91  |
| 15683 | 3.67447  | 0 | 0.272148 | 0 | 1 | 4 FALSE | CA2      |
| 15685 | 3.67447  | 0 | 0.272148 | 0 | 1 | 4 FALSE | CACNA1E  |
| 15693 | 3.67447  | 0 | 0.272148 | 0 | 1 | 4 FALSE | CALR     |

|       |         |   |          |   |   |         |           |
|-------|---------|---|----------|---|---|---------|-----------|
| 15695 | 3.67447 | 0 | 0.272148 | 0 | 1 | 4 FALSE | CAND1     |
| 15699 | 3.67447 | 0 | 0.272148 | 0 | 1 | 4 FALSE | CARM1     |
| 15703 | 3.67447 | 0 | 0.272148 | 0 | 1 | 4 FALSE | CASP5     |
| 15707 | 3.67447 | 0 | 0.272148 | 0 | 1 | 4 FALSE | CAT       |
| 15714 | 3.67447 | 0 | 0.272148 | 0 | 1 | 4 FALSE | CCDC170   |
| 15718 | 3.67447 | 0 | 0.272148 | 0 | 1 | 4 FALSE | CCDC61    |
| 15721 | 3.67447 | 0 | 0.272148 | 0 | 1 | 4 FALSE | CCDC93    |
| 15724 | 3.67447 | 0 | 0.272148 | 0 | 1 | 4 FALSE | CCR5      |
| 15726 | 3.67447 | 0 | 0.272148 | 0 | 1 | 4 FALSE | CCR6      |
| 15728 | 3.67447 | 0 | 0.272148 | 0 | 1 | 4 FALSE | CCSER1    |
| 15738 | 3.67447 | 0 | 0.272148 | 0 | 1 | 4 FALSE | CDC42EP3  |
| 15746 | 3.67447 | 0 | 0.272148 | 0 | 1 | 4 FALSE | CDKN2AIP1 |
| 15750 | 3.67447 | 0 | 0.272148 | 0 | 1 | 4 FALSE | CENPP     |
| 15752 | 3.67447 | 0 | 0.272148 | 0 | 1 | 4 FALSE | CEP95     |
| 15754 | 3.67447 | 0 | 0.272148 | 0 | 1 | 4 FALSE | CERS4     |
| 15757 | 3.67447 | 0 | 0.272148 | 0 | 1 | 4 FALSE | CHD6      |
| 15763 | 3.67447 | 0 | 0.272148 | 0 | 1 | 4 FALSE | CHST10    |
| 15765 | 3.67447 | 0 | 0.272148 | 0 | 1 | 4 FALSE | CIPC      |
| 15767 | 3.67447 | 0 | 0.272148 | 0 | 1 | 4 FALSE | CLEC17A   |
| 15769 | 3.67447 | 0 | 0.272148 | 0 | 1 | 4 FALSE | CLN3      |
| 15771 | 3.67447 | 0 | 0.272148 | 0 | 1 | 4 FALSE | CLPTM1L   |
| 15773 | 3.67447 | 0 | 0.272148 | 0 | 1 | 4 FALSE | CMPK1     |
| 15775 | 3.67447 | 0 | 0.272148 | 0 | 1 | 4 FALSE | CNOT10    |
| 15779 | 3.67447 | 0 | 0.272148 | 0 | 1 | 4 FALSE | COA1      |
| 15791 | 3.67447 | 0 | 0.272148 | 0 | 1 | 4 FALSE | COPS3     |
| 15797 | 3.67447 | 0 | 0.272148 | 0 | 1 | 4 FALSE | CPB1      |
| 15799 | 3.67447 | 0 | 0.272148 | 0 | 1 | 4 FALSE | CPSF7     |
| 15801 | 3.67447 | 0 | 0.272148 | 0 | 1 | 4 FALSE | CRAMP1L   |
| 15808 | 3.67447 | 0 | 0.272148 | 0 | 1 | 4 FALSE | CREG2     |
| 15810 | 3.67447 | 0 | 0.272148 | 0 | 1 | 4 FALSE | CRTC2     |
| 15816 | 3.67447 | 0 | 0.272148 | 0 | 1 | 4 FALSE | CSNK2A2   |
| 15820 | 3.67447 | 0 | 0.272148 | 0 | 1 | 4 FALSE | CSRP1     |
| 15824 | 3.67447 | 0 | 0.272148 | 0 | 1 | 4 FALSE | CTH       |
| 15830 | 3.67447 | 0 | 0.272148 | 0 | 1 | 4 FALSE | CTXN1     |
| 15834 | 3.67447 | 0 | 0.272148 | 0 | 1 | 4 FALSE | CYB5R3    |
| 15837 | 3.67447 | 0 | 0.272148 | 0 | 1 | 4 FALSE | CYP2C9    |
| 15839 | 3.67447 | 0 | 0.272148 | 0 | 1 | 4 FALSE | D2HGDH    |
| 15843 | 3.67447 | 0 | 0.272148 | 0 | 1 | 4 FALSE | DAPK1     |
| 15847 | 3.67447 | 0 | 0.272148 | 0 | 1 | 4 FALSE | DBT       |
| 15849 | 3.67447 | 0 | 0.272148 | 0 | 1 | 4 FALSE | DCAF8     |
| 15852 | 3.67447 | 0 | 0.272148 | 0 | 1 | 4 FALSE | DCTN6     |
| 15854 | 3.67447 | 0 | 0.272148 | 0 | 1 | 4 FALSE | DCUN1D2   |
| 15860 | 3.67447 | 0 | 0.272148 | 0 | 1 | 4 FALSE | DHDDS     |
| 15865 | 3.67447 | 0 | 0.272148 | 0 | 1 | 4 FALSE | DIEXF     |
| 15867 | 3.67447 | 0 | 0.272148 | 0 | 1 | 4 FALSE | DLG1      |
| 15869 | 3.67447 | 0 | 0.272148 | 0 | 1 | 4 FALSE | DLGAP4    |
| 15874 | 3.67447 | 0 | 0.272148 | 0 | 1 | 4 FALSE | DOT1L     |

|       |          |          |          |   |     |   |       |       |            |
|-------|----------|----------|----------|---|-----|---|-------|-------|------------|
| 15876 | 3.67447  | 0        | 0.272148 | 0 | 1   | 4 | FALSE |       | DPYSL3     |
| 15880 | 3.67447  | 0        | 0.272148 | 0 | 1   | 4 | FALSE |       | DRG1       |
| 15884 | 3.67447  | 0        | 0.272148 | 0 | 1   | 4 | FALSE |       | DTNB       |
| 15886 | 3.67447  | 0        | 0.272148 | 0 | 1   | 4 | FALSE |       | DUS1L      |
| 15888 | 3.67447  | 0        | 0.272148 | 0 | 1   | 4 | FALSE |       | DUSP16     |
| 15891 | 3.67447  | 0        | 0.272148 | 0 | 1   | 4 | FALSE |       | DYRK1B     |
| 15898 | 3.67447  | 0        | 0.272148 | 0 | 1   | 4 | FALSE |       | EFNA1      |
| 15900 | 3.67447  | 0        | 0.272148 | 0 | 1   | 4 | FALSE |       | EIF1       |
| 15906 | 3.67447  | 0        | 0.272148 | 0 | 1   | 4 | FALSE |       | EIF2AK2    |
| 15908 | 3.67447  | 0        | 0.272148 | 0 | 1   | 4 | FALSE |       | EIF2B1     |
| 15910 | 3.67447  | 0        | 0.272148 | 0 | 1   | 4 | FALSE |       | EIF2S3L    |
| 15912 | 3.67447  | 0        | 0.272148 | 0 | 1   | 4 | FALSE |       | EIF3A      |
| 15923 | 3.67447  | 0        | 0.272148 | 0 | 1   | 4 | FALSE |       | ELMO2      |
| 15925 | 3.67447  | 0        | 0.272148 | 0 | 1   | 4 | FALSE |       | ELMOD1     |
| 15932 | 3.67447  | 0        | 0.272148 | 0 | 1   | 4 | FALSE |       | ENO4       |
| 15936 | 3.67447  | 0        | 0.272148 | 0 | 1   | 4 | FALSE |       | EPB42      |
| 15940 | 3.67447  | 0        | 0.272148 | 0 | 1   | 4 | FALSE |       | EPN1       |
| 15944 | 3.67447  | 0        | 0.272148 | 0 | 1   | 4 | FALSE |       | ERGIC1     |
| 15946 | 3.67447  | 0        | 0.272148 | 0 | 1   | 4 | FALSE |       | ERK5       |
| 15950 | 3.67447  | 0        | 0.272148 | 0 | 1   | 4 | FALSE |       | ETFDH      |
| 18313 | 2.778249 | 0.082097 | 0.359939 | 0 | 593 | 3 | FALSE | miRNA | hsa-miR-14 |
| 15953 | 3.67447  | 0        | 0.272148 | 0 | 1   | 4 | FALSE |       | EXOSC10    |
| 15959 | 3.67447  | 0        | 0.272148 | 0 | 1   | 4 | FALSE |       | FAM120AC   |
| 15968 | 3.67447  | 0        | 0.272148 | 0 | 1   | 4 | FALSE |       | FAM60A     |
| 15970 | 3.67447  | 0        | 0.272148 | 0 | 1   | 4 | FALSE |       | FAM71F2    |
| 15972 | 3.67447  | 0        | 0.272148 | 0 | 1   | 4 | FALSE |       | FAM76B     |
| 15974 | 3.67447  | 0        | 0.272148 | 0 | 1   | 4 | FALSE |       | FAM83F     |
| 15980 | 3.67447  | 0        | 0.272148 | 0 | 1   | 4 | FALSE |       | FBXO31     |
| 15982 | 3.67447  | 0        | 0.272148 | 0 | 1   | 4 | FALSE |       | FBXO38     |
| 15984 | 3.67447  | 0        | 0.272148 | 0 | 1   | 4 | FALSE |       | FGD6       |
| 15988 | 3.67447  | 0        | 0.272148 | 0 | 1   | 4 | FALSE |       | FHIT       |
| 15990 | 3.67447  | 0        | 0.272148 | 0 | 1   | 4 | FALSE |       | FIGNL1     |
| 15994 | 3.67447  | 0        | 0.272148 | 0 | 1   | 4 | FALSE |       | FNDC1      |
| 15999 | 3.67447  | 0        | 0.272148 | 0 | 1   | 4 | FALSE |       | FOSB       |
| 16001 | 3.67447  | 0        | 0.272148 | 0 | 1   | 4 | FALSE |       | FOXJ2      |
| 16007 | 3.67447  | 0        | 0.272148 | 0 | 1   | 4 | FALSE |       | FSD2       |
| 16009 | 3.67447  | 0        | 0.272148 | 0 | 1   | 4 | FALSE |       | FTL        |
| 16011 | 3.67447  | 0        | 0.272148 | 0 | 1   | 4 | FALSE |       | FZD2       |
| 16013 | 3.67447  | 0        | 0.272148 | 0 | 1   | 4 | FALSE |       | G6PD       |
| 16017 | 3.67447  | 0        | 0.272148 | 0 | 1   | 4 | FALSE |       | GABBR1     |
| 16020 | 3.67447  | 0        | 0.272148 | 0 | 1   | 4 | FALSE |       | GAL        |
| 16029 | 3.67447  | 0        | 0.272148 | 0 | 1   | 4 | FALSE |       | GATM       |
| 16039 | 3.67447  | 0        | 0.272148 | 0 | 1   | 4 | FALSE |       | GLB1L      |
| 16044 | 3.67447  | 0        | 0.272148 | 0 | 1   | 4 | FALSE |       | GLRA3      |
| 16050 | 3.67447  | 0        | 0.272148 | 0 | 1   | 4 | FALSE |       | GMEB1      |
| 16055 | 3.67447  | 0        | 0.272148 | 0 | 1   | 4 | FALSE |       | GOLGA8B    |
| 16057 | 3.67447  | 0        | 0.272148 | 0 | 1   | 4 | FALSE |       | GORAB      |



|       |         |   |          |   |   |         |           |
|-------|---------|---|----------|---|---|---------|-----------|
| 16063 | 3.67447 | 0 | 0.272148 | 0 | 1 | 4 FALSE | GPR180    |
| 16066 | 3.67447 | 0 | 0.272148 | 0 | 1 | 4 FALSE | GPT2      |
| 16068 | 3.67447 | 0 | 0.272148 | 0 | 1 | 4 FALSE | GTF2H5    |
| 16070 | 3.67447 | 0 | 0.272148 | 0 | 1 | 4 FALSE | GTF3C2    |
| 16072 | 3.67447 | 0 | 0.272148 | 0 | 1 | 4 FALSE | GTF3C3    |
| 16074 | 3.67447 | 0 | 0.272148 | 0 | 1 | 4 FALSE | GUCY1A3   |
| 16076 | 3.67447 | 0 | 0.272148 | 0 | 1 | 4 FALSE | GXYLT1    |
| 16078 | 3.67447 | 0 | 0.272148 | 0 | 1 | 4 FALSE | GYG1      |
| 16082 | 3.67447 | 0 | 0.272148 | 0 | 1 | 4 FALSE | HCCS      |
| 16084 | 3.67447 | 0 | 0.272148 | 0 | 1 | 4 FALSE | HDHD1     |
| 16092 | 3.67447 | 0 | 0.272148 | 0 | 1 | 4 FALSE | HINT1     |
| 16099 | 3.67447 | 0 | 0.272148 | 0 | 1 | 4 FALSE | HIST1H2BG |
| 16101 | 3.67447 | 0 | 0.272148 | 0 | 1 | 4 FALSE | HIVEP1    |
| 16105 | 3.67447 | 0 | 0.272148 | 0 | 1 | 4 FALSE | HLA-E     |
| 16107 | 3.67447 | 0 | 0.272148 | 0 | 1 | 4 FALSE | HMGB1     |
| 16116 | 3.67447 | 0 | 0.272148 | 0 | 1 | 4 FALSE | HOXB2     |
| 16118 | 3.67447 | 0 | 0.272148 | 0 | 1 | 4 FALSE | HOXC6     |
| 16120 | 3.67447 | 0 | 0.272148 | 0 | 1 | 4 FALSE | HRAS      |
| 16122 | 3.67447 | 0 | 0.272148 | 0 | 1 | 4 FALSE | HS6ST2    |
| 16129 | 3.67447 | 0 | 0.272148 | 0 | 1 | 4 FALSE | HTT       |
| 16134 | 3.67447 | 0 | 0.272148 | 0 | 1 | 4 FALSE | HYPK      |
| 16136 | 3.67447 | 0 | 0.272148 | 0 | 1 | 4 FALSE | IAPP      |
| 16140 | 3.67447 | 0 | 0.272148 | 0 | 1 | 4 FALSE | IFNAR2    |
| 16148 | 3.67447 | 0 | 0.272148 | 0 | 1 | 4 FALSE | IL10RB    |
| 16150 | 3.67447 | 0 | 0.272148 | 0 | 1 | 4 FALSE | IL13RA1   |
| 16152 | 3.67447 | 0 | 0.272148 | 0 | 1 | 4 FALSE | IMPDH2    |
| 16155 | 3.67447 | 0 | 0.272148 | 0 | 1 | 4 FALSE | INPP5F    |
| 16157 | 3.67447 | 0 | 0.272148 | 0 | 1 | 4 FALSE | IPO11     |
| 16165 | 3.67447 | 0 | 0.272148 | 0 | 1 | 4 FALSE | ITGB4     |
| 16171 | 3.67447 | 0 | 0.272148 | 0 | 1 | 4 FALSE | JAKMIP2   |
| 16175 | 3.67447 | 0 | 0.272148 | 0 | 1 | 4 FALSE | JDP2      |
| 16178 | 3.67447 | 0 | 0.272148 | 0 | 1 | 4 FALSE | JPH1      |
| 16180 | 3.67447 | 0 | 0.272148 | 0 | 1 | 4 FALSE | KANK2     |
| 16183 | 3.67447 | 0 | 0.272148 | 0 | 1 | 4 FALSE | KARS      |
| 16185 | 3.67447 | 0 | 0.272148 | 0 | 1 | 4 FALSE | KAT6A     |
| 16187 | 3.67447 | 0 | 0.272148 | 0 | 1 | 4 FALSE | KAT6B     |
| 16191 | 3.67447 | 0 | 0.272148 | 0 | 1 | 4 FALSE | KCNJ3     |
| 16194 | 3.67447 | 0 | 0.272148 | 0 | 1 | 4 FALSE | KDM1A     |
| 16200 | 3.67447 | 0 | 0.272148 | 0 | 1 | 4 FALSE | KIAA0355  |
| 16206 | 3.67447 | 0 | 0.272148 | 0 | 1 | 4 FALSE | KIAA1147  |
| 16209 | 3.67447 | 0 | 0.272148 | 0 | 1 | 4 FALSE | KIF23     |
| 16215 | 3.67447 | 0 | 0.272148 | 0 | 1 | 4 FALSE | KLK10     |
| 16219 | 3.67447 | 0 | 0.272148 | 0 | 1 | 4 FALSE | KPNA1     |
| 16228 | 3.67447 | 0 | 0.272148 | 0 | 1 | 4 FALSE | LGR4      |
| 16238 | 3.67447 | 0 | 0.272148 | 0 | 1 | 4 FALSE | LMAN2     |
| 16240 | 3.67447 | 0 | 0.272148 | 0 | 1 | 4 FALSE | LMBR1L    |
| 16243 | 3.67447 | 0 | 0.272148 | 0 | 1 | 4 FALSE | LMO7      |

|       |         |   |          |   |   |         |           |
|-------|---------|---|----------|---|---|---------|-----------|
| 16245 | 3.67447 | 0 | 0.272148 | 0 | 1 | 4 FALSE | LOXL4     |
| 16247 | 3.67447 | 0 | 0.272148 | 0 | 1 | 4 FALSE | LRAT      |
| 16249 | 3.67447 | 0 | 0.272148 | 0 | 1 | 4 FALSE | LRIT3     |
| 16251 | 3.67447 | 0 | 0.272148 | 0 | 1 | 4 FALSE | LRP1      |
| 16259 | 3.67447 | 0 | 0.272148 | 0 | 1 | 4 FALSE | LYN       |
| 16262 | 3.67447 | 0 | 0.272148 | 0 | 1 | 4 FALSE | LZTR1     |
| 16264 | 3.67447 | 0 | 0.272148 | 0 | 1 | 4 FALSE | MACC1     |
| 16270 | 3.67447 | 0 | 0.272148 | 0 | 1 | 4 FALSE | MAPK7     |
| 16278 | 3.67447 | 0 | 0.272148 | 0 | 1 | 4 FALSE | MCM3      |
| 16282 | 3.67447 | 0 | 0.272148 | 0 | 1 | 4 FALSE | MCMBP     |
| 16286 | 3.67447 | 0 | 0.272148 | 0 | 1 | 4 FALSE | MCRS1     |
| 16288 | 3.67447 | 0 | 0.272148 | 0 | 1 | 4 FALSE | MDC1      |
| 16291 | 3.67447 | 0 | 0.272148 | 0 | 1 | 4 FALSE | MED12     |
| 16293 | 3.67447 | 0 | 0.272148 | 0 | 1 | 4 FALSE | MED14     |
| 16298 | 3.67447 | 0 | 0.272148 | 0 | 1 | 4 FALSE | METAP1    |
| 16300 | 3.67447 | 0 | 0.272148 | 0 | 1 | 4 FALSE | MGA       |
| 16310 | 3.67447 | 0 | 0.272148 | 0 | 1 | 4 FALSE | MLF2      |
| 16313 | 3.67447 | 0 | 0.272148 | 0 | 1 | 4 FALSE | MLLT3     |
| 16315 | 3.67447 | 0 | 0.272148 | 0 | 1 | 4 FALSE | MMP-13    |
| 16317 | 3.67447 | 0 | 0.272148 | 0 | 1 | 4 FALSE | MMP13     |
| 16327 | 3.67447 | 0 | 0.272148 | 0 | 1 | 4 FALSE | MON1A     |
| 16329 | 3.67447 | 0 | 0.272148 | 0 | 1 | 4 FALSE | MRPL18    |
| 16333 | 3.67447 | 0 | 0.272148 | 0 | 1 | 4 FALSE | MTMR3     |
| 16335 | 3.67447 | 0 | 0.272148 | 0 | 1 | 4 FALSE | MUC13     |
| 16347 | 3.67447 | 0 | 0.272148 | 0 | 1 | 4 FALSE | NAT6      |
| 16349 | 3.67447 | 0 | 0.272148 | 0 | 1 | 4 FALSE | NBEA      |
| 16352 | 3.67447 | 0 | 0.272148 | 0 | 1 | 4 FALSE | NCKIPSD   |
| 16354 | 3.67447 | 0 | 0.272148 | 0 | 1 | 4 FALSE | NEK6      |
| 16356 | 3.67447 | 0 | 0.272148 | 0 | 1 | 4 FALSE | NF-??B    |
| 16364 | 3.67447 | 0 | 0.272148 | 0 | 1 | 4 FALSE | NFKB2     |
| 16370 | 3.67447 | 0 | 0.272148 | 0 | 1 | 4 FALSE | NKTR      |
| 16374 | 3.67447 | 0 | 0.272148 | 0 | 1 | 4 FALSE | NOL8      |
| 16378 | 3.67447 | 0 | 0.272148 | 0 | 1 | 4 FALSE | NPAT      |
| 16380 | 3.67447 | 0 | 0.272148 | 0 | 1 | 4 FALSE | NPM1      |
| 16382 | 3.67447 | 0 | 0.272148 | 0 | 1 | 4 FALSE | NPR1      |
| 16384 | 3.67447 | 0 | 0.272148 | 0 | 1 | 4 FALSE | NPR3      |
| 16392 | 3.67447 | 0 | 0.272148 | 0 | 1 | 4 FALSE | NSUN4     |
| 16394 | 3.67447 | 0 | 0.272148 | 0 | 1 | 4 FALSE | NUBPL     |
| 16396 | 3.67447 | 0 | 0.272148 | 0 | 1 | 4 FALSE | NUCB1     |
| 16399 | 3.67447 | 0 | 0.272148 | 0 | 1 | 4 FALSE | NUDCD1    |
| 16410 | 3.67447 | 0 | 0.272148 | 0 | 1 | 4 FALSE | ODF2L     |
| 16414 | 3.67447 | 0 | 0.272148 | 0 | 1 | 4 FALSE | OSBPL2    |
| 16416 | 3.67447 | 0 | 0.272148 | 0 | 1 | 4 FALSE | OSBPL8    |
| 16418 | 3.67447 | 0 | 0.272148 | 0 | 1 | 4 FALSE | OSTF1     |
| 16425 | 3.67447 | 0 | 0.272148 | 0 | 1 | 4 FALSE | PALLD     |
| 16427 | 3.67447 | 0 | 0.272148 | 0 | 1 | 4 FALSE | PAN3      |
| 16432 | 3.67447 | 0 | 0.272148 | 0 | 1 | 4 FALSE | PARD6G-A' |

|       |         |   |          |   |   |         |          |
|-------|---------|---|----------|---|---|---------|----------|
| 16434 | 3.67447 | 0 | 0.272148 | 0 | 1 | 4 FALSE | PCDHGA8  |
| 16436 | 3.67447 | 0 | 0.272148 | 0 | 1 | 4 FALSE | PDCD11   |
| 16442 | 3.67447 | 0 | 0.272148 | 0 | 1 | 4 FALSE | PDGFB    |
| 16451 | 3.67447 | 0 | 0.272148 | 0 | 1 | 4 FALSE | PERP     |
| 16455 | 3.67447 | 0 | 0.272148 | 0 | 1 | 4 FALSE | PGD      |
| 16457 | 3.67447 | 0 | 0.272148 | 0 | 1 | 4 FALSE | PGLS     |
| 16459 | 3.67447 | 0 | 0.272148 | 0 | 1 | 4 FALSE | PHAX     |
| 16467 | 3.67447 | 0 | 0.272148 | 0 | 1 | 4 FALSE | PKD2     |
| 16469 | 3.67447 | 0 | 0.272148 | 0 | 1 | 4 FALSE | PKP2     |
| 16474 | 3.67447 | 0 | 0.272148 | 0 | 1 | 4 FALSE | PLCD3    |
| 16476 | 3.67447 | 0 | 0.272148 | 0 | 1 | 4 FALSE | PLCL2    |
| 16480 | 3.67447 | 0 | 0.272148 | 0 | 1 | 4 FALSE | PLEKHM3  |
| 16483 | 3.67447 | 0 | 0.272148 | 0 | 1 | 4 FALSE | PNPO     |
| 16485 | 3.67447 | 0 | 0.272148 | 0 | 1 | 4 FALSE | POC5     |
| 16489 | 3.67447 | 0 | 0.272148 | 0 | 1 | 4 FALSE | POLR2C   |
| 16491 | 3.67447 | 0 | 0.272148 | 0 | 1 | 4 FALSE | POLR3A   |
| 16494 | 3.67447 | 0 | 0.272148 | 0 | 1 | 4 FALSE | PPIA     |
| 16499 | 3.67447 | 0 | 0.272148 | 0 | 1 | 4 FALSE | PPP1R15A |
| 16504 | 3.67447 | 0 | 0.272148 | 0 | 1 | 4 FALSE | PPP4R2   |
| 16507 | 3.67447 | 0 | 0.272148 | 0 | 1 | 4 FALSE | PRDM4    |
| 16509 | 3.67447 | 0 | 0.272148 | 0 | 1 | 4 FALSE | PRKAB2   |
| 16514 | 3.67447 | 0 | 0.272148 | 0 | 1 | 4 FALSE | PRR23A   |
| 16516 | 3.67447 | 0 | 0.272148 | 0 | 1 | 4 FALSE | PRRC2B   |
| 16519 | 3.67447 | 0 | 0.272148 | 0 | 1 | 4 FALSE | PRSS23   |
| 16521 | 3.67447 | 0 | 0.272148 | 0 | 1 | 4 FALSE | PSD3     |
| 16538 | 3.67447 | 0 | 0.272148 | 0 | 1 | 4 FALSE | PXK      |
| 16543 | 3.67447 | 0 | 0.272148 | 0 | 1 | 4 FALSE | R3HCC1L  |
| 16546 | 3.67447 | 0 | 0.272148 | 0 | 1 | 4 FALSE | RAB22A   |
| 16549 | 3.67447 | 0 | 0.272148 | 0 | 1 | 4 FALSE | RAD1     |
| 16552 | 3.67447 | 0 | 0.272148 | 0 | 1 | 4 FALSE | RAE1     |
| 16556 | 3.67447 | 0 | 0.272148 | 0 | 1 | 4 FALSE | RANBP10  |
| 16562 | 3.67447 | 0 | 0.272148 | 0 | 1 | 4 FALSE | RBBP4    |
| 16564 | 3.67447 | 0 | 0.272148 | 0 | 1 | 4 FALSE | RBBP6    |
| 16566 | 3.67447 | 0 | 0.272148 | 0 | 1 | 4 FALSE | RBFOX2   |
| 16568 | 3.67447 | 0 | 0.272148 | 0 | 1 | 4 FALSE | RBM12    |
| 16571 | 3.67447 | 0 | 0.272148 | 0 | 1 | 4 FALSE | RBM33    |
| 16573 | 3.67447 | 0 | 0.272148 | 0 | 1 | 4 FALSE | RBMS1    |
| 16586 | 3.67447 | 0 | 0.272148 | 0 | 1 | 4 FALSE | RHBDD2   |
| 16588 | 3.67447 | 0 | 0.272148 | 0 | 1 | 4 FALSE | RHOT1    |
| 16592 | 3.67447 | 0 | 0.272148 | 0 | 1 | 4 FALSE | RINT1    |
| 16594 | 3.67447 | 0 | 0.272148 | 0 | 1 | 4 FALSE | RIT1     |
| 16596 | 3.67447 | 0 | 0.272148 | 0 | 1 | 4 FALSE | RMND5A   |
| 16602 | 3.67447 | 0 | 0.272148 | 0 | 1 | 4 FALSE | RNH1     |
| 16604 | 3.67447 | 0 | 0.272148 | 0 | 1 | 4 FALSE | RPL13    |
| 16606 | 3.67447 | 0 | 0.272148 | 0 | 1 | 4 FALSE | RPL37    |
| 16611 | 3.67447 | 0 | 0.272148 | 0 | 1 | 4 FALSE | RPS27    |
| 16613 | 3.67447 | 0 | 0.272148 | 0 | 1 | 4 FALSE | RPS6KA2  |

|       |         |   |          |   |   |         |          |
|-------|---------|---|----------|---|---|---------|----------|
| 16615 | 3.67447 | 0 | 0.272148 | 0 | 1 | 4 FALSE | RPTOR    |
| 16621 | 3.67447 | 0 | 0.272148 | 0 | 1 | 4 FALSE | RUNDC1   |
| 16623 | 3.67447 | 0 | 0.272148 | 0 | 1 | 4 FALSE | S100A10  |
| 16625 | 3.67447 | 0 | 0.272148 | 0 | 1 | 4 FALSE | SAE1     |
| 16628 | 3.67447 | 0 | 0.272148 | 0 | 1 | 4 FALSE | SAP130   |
| 16630 | 3.67447 | 0 | 0.272148 | 0 | 1 | 4 FALSE | SARS     |
| 16632 | 3.67447 | 0 | 0.272148 | 0 | 1 | 4 FALSE | SCN11A   |
| 16634 | 3.67447 | 0 | 0.272148 | 0 | 1 | 4 FALSE | SCN2B    |
| 16640 | 3.67447 | 0 | 0.272148 | 0 | 1 | 4 FALSE | SDR39U1  |
| 16649 | 3.67447 | 0 | 0.272148 | 0 | 1 | 4 FALSE | SERPINB1 |
| 16654 | 3.67447 | 0 | 0.272148 | 0 | 1 | 4 FALSE | SETMAR   |
| 16656 | 3.67447 | 0 | 0.272148 | 0 | 1 | 4 FALSE | SF3B2    |
| 16662 | 3.67447 | 0 | 0.272148 | 0 | 1 | 4 FALSE | SFXN2    |
| 16666 | 3.67447 | 0 | 0.272148 | 0 | 1 | 4 FALSE | SIK1     |
| 16668 | 3.67447 | 0 | 0.272148 | 0 | 1 | 4 FALSE | SIPA1L3  |
| 16672 | 3.67447 | 0 | 0.272148 | 0 | 1 | 4 FALSE | SLC15A4  |
| 16674 | 3.67447 | 0 | 0.272148 | 0 | 1 | 4 FALSE | SLC1A3   |
| 16682 | 3.67447 | 0 | 0.272148 | 0 | 1 | 4 FALSE | SLC25A42 |
| 16688 | 3.67447 | 0 | 0.272148 | 0 | 1 | 4 FALSE | SLC26A6  |
| 16690 | 3.67447 | 0 | 0.272148 | 0 | 1 | 4 FALSE | SLC2A14  |
| 16692 | 3.67447 | 0 | 0.272148 | 0 | 1 | 4 FALSE | SLC30A9  |
| 16694 | 3.67447 | 0 | 0.272148 | 0 | 1 | 4 FALSE | SLC35B2  |
| 16696 | 3.67447 | 0 | 0.272148 | 0 | 1 | 4 FALSE | SLC35F6  |
| 16700 | 3.67447 | 0 | 0.272148 | 0 | 1 | 4 FALSE | SLC38A7  |
| 16702 | 3.67447 | 0 | 0.272148 | 0 | 1 | 4 FALSE | SLC39A1  |
| 16705 | 3.67447 | 0 | 0.272148 | 0 | 1 | 4 FALSE | SLC6A18  |
| 16719 | 3.67447 | 0 | 0.272148 | 0 | 1 | 4 FALSE | SMG9     |
| 16722 | 3.67447 | 0 | 0.272148 | 0 | 1 | 4 FALSE | SNX2     |
| 16726 | 3.67447 | 0 | 0.272148 | 0 | 1 | 4 FALSE | SOBP     |
| 16732 | 3.67447 | 0 | 0.272148 | 0 | 1 | 4 FALSE | SP110    |
| 16734 | 3.67447 | 0 | 0.272148 | 0 | 1 | 4 FALSE | SP2      |
| 16737 | 3.67447 | 0 | 0.272148 | 0 | 1 | 4 FALSE | SPRED3   |
| 16741 | 3.67447 | 0 | 0.272148 | 0 | 1 | 4 FALSE | SPTLC2   |
| 16744 | 3.67447 | 0 | 0.272148 | 0 | 1 | 4 FALSE | SRCAP    |
| 16746 | 3.67447 | 0 | 0.272148 | 0 | 1 | 4 FALSE | SRRM1    |
| 16748 | 3.67447 | 0 | 0.272148 | 0 | 1 | 4 FALSE | SRRM2    |
| 16759 | 3.67447 | 0 | 0.272148 | 0 | 1 | 4 FALSE | STRBP    |
| 16761 | 3.67447 | 0 | 0.272148 | 0 | 1 | 4 FALSE | STRN     |
| 16763 | 3.67447 | 0 | 0.272148 | 0 | 1 | 4 FALSE | SWSAP1   |
| 16765 | 3.67447 | 0 | 0.272148 | 0 | 1 | 4 FALSE | SYCE1    |
| 16771 | 3.67447 | 0 | 0.272148 | 0 | 1 | 4 FALSE | TAF10    |
| 16775 | 3.67447 | 0 | 0.272148 | 0 | 1 | 4 FALSE | TAF4B    |
| 16777 | 3.67447 | 0 | 0.272148 | 0 | 1 | 4 FALSE | TALDO1   |
| 16781 | 3.67447 | 0 | 0.272148 | 0 | 1 | 4 FALSE | TATDN2   |
| 16786 | 3.67447 | 0 | 0.272148 | 0 | 1 | 4 FALSE | TECPR1   |
| 16788 | 3.67447 | 0 | 0.272148 | 0 | 1 | 4 FALSE | TENM4    |
| 16796 | 3.67447 | 0 | 0.272148 | 0 | 1 | 4 FALSE | TFPI     |

|       |         |   |          |   |   |         |          |
|-------|---------|---|----------|---|---|---------|----------|
| 16799 | 3.67447 | 0 | 0.272148 | 0 | 1 | 4 FALSE | THAP1    |
| 16808 | 3.67447 | 0 | 0.272148 | 0 | 1 | 4 FALSE | TMCO3    |
| 16810 | 3.67447 | 0 | 0.272148 | 0 | 1 | 4 FALSE | TMED10   |
| 16817 | 3.67447 | 0 | 0.272148 | 0 | 1 | 4 FALSE | TMEM120  |
| 16823 | 3.67447 | 0 | 0.272148 | 0 | 1 | 4 FALSE | TMEM205  |
| 16832 | 3.67447 | 0 | 0.272148 | 0 | 1 | 4 FALSE | TMEM97   |
| 16845 | 3.67447 | 0 | 0.272148 | 0 | 1 | 4 FALSE | TONSL    |
| 16849 | 3.67447 | 0 | 0.272148 | 0 | 1 | 4 FALSE | TPP1     |
| 16853 | 3.67447 | 0 | 0.272148 | 0 | 1 | 4 FALSE | TRAPPC8  |
| 16861 | 3.67447 | 0 | 0.272148 | 0 | 1 | 4 FALSE | TSPAN11  |
| 16863 | 3.67447 | 0 | 0.272148 | 0 | 1 | 4 FALSE | TTC38    |
| 16866 | 3.67447 | 0 | 0.272148 | 0 | 1 | 4 FALSE | TUBA1B   |
| 16871 | 3.67447 | 0 | 0.272148 | 0 | 1 | 4 FALSE | TUBB2A   |
| 16873 | 3.67447 | 0 | 0.272148 | 0 | 1 | 4 FALSE | TULP3    |
| 16876 | 3.67447 | 0 | 0.272148 | 0 | 1 | 4 FALSE | TXNL4B   |
| 16880 | 3.67447 | 0 | 0.272148 | 0 | 1 | 4 FALSE | UBE2E1   |
| 16882 | 3.67447 | 0 | 0.272148 | 0 | 1 | 4 FALSE | UBE2E3   |
| 16884 | 3.67447 | 0 | 0.272148 | 0 | 1 | 4 FALSE | UBE2R2   |
| 16889 | 3.67447 | 0 | 0.272148 | 0 | 1 | 4 FALSE | UBTF     |
| 16891 | 3.67447 | 0 | 0.272148 | 0 | 1 | 4 FALSE | UCK2     |
| 16895 | 3.67447 | 0 | 0.272148 | 0 | 1 | 4 FALSE | UNKL     |
| 16897 | 3.67447 | 0 | 0.272148 | 0 | 1 | 4 FALSE | UQCC1    |
| 16907 | 3.67447 | 0 | 0.272148 | 0 | 1 | 4 FALSE | VASH1    |
| 16911 | 3.67447 | 0 | 0.272148 | 0 | 1 | 4 FALSE | VKORC1L1 |
| 16913 | 3.67447 | 0 | 0.272148 | 0 | 1 | 4 FALSE | VOPP1    |
| 16917 | 3.67447 | 0 | 0.272148 | 0 | 1 | 4 FALSE | VTI1B    |
| 16920 | 3.67447 | 0 | 0.272148 | 0 | 1 | 4 FALSE | WDFY1    |
| 16922 | 3.67447 | 0 | 0.272148 | 0 | 1 | 4 FALSE | WDR11    |
| 16924 | 3.67447 | 0 | 0.272148 | 0 | 1 | 4 FALSE | WDR12    |
| 16928 | 3.67447 | 0 | 0.272148 | 0 | 1 | 4 FALSE | WDR76    |
| 16930 | 3.67447 | 0 | 0.272148 | 0 | 1 | 4 FALSE | WDR81    |
| 16932 | 3.67447 | 0 | 0.272148 | 0 | 1 | 4 FALSE | WDR82    |
| 16935 | 3.67447 | 0 | 0.272148 | 0 | 1 | 4 FALSE | WIPF2    |
| 16937 | 3.67447 | 0 | 0.272148 | 0 | 1 | 4 FALSE | WIZ      |
| 16941 | 3.67447 | 0 | 0.272148 | 0 | 1 | 4 FALSE | XPR1     |
| 16946 | 3.67447 | 0 | 0.272148 | 0 | 1 | 4 FALSE | YPEL5    |
| 16951 | 3.67447 | 0 | 0.272148 | 0 | 1 | 4 FALSE | YWHAQ    |
| 16956 | 3.67447 | 0 | 0.272148 | 0 | 1 | 4 FALSE | ZBTB3    |
| 16962 | 3.67447 | 0 | 0.272148 | 0 | 1 | 4 FALSE | ZBTB44   |
| 16967 | 3.67447 | 0 | 0.272148 | 0 | 1 | 4 FALSE | ZC3H15   |
| 16971 | 3.67447 | 0 | 0.272148 | 0 | 1 | 4 FALSE | ZDHHC2   |
| 16973 | 3.67447 | 0 | 0.272148 | 0 | 1 | 4 FALSE | ZDHHC3   |
| 16978 | 3.67447 | 0 | 0.272148 | 0 | 1 | 4 FALSE | ZFP36    |
| 16982 | 3.67447 | 0 | 0.272148 | 0 | 1 | 4 FALSE | ZFP37    |
| 16984 | 3.67447 | 0 | 0.272148 | 0 | 1 | 4 FALSE | ZHX2     |
| 16992 | 3.67447 | 0 | 0.272148 | 0 | 1 | 4 FALSE | ZNF121   |
| 16995 | 3.67447 | 0 | 0.272148 | 0 | 1 | 4 FALSE | ZNF23    |

|       |          |   |          |   |   |   |       |          |
|-------|----------|---|----------|---|---|---|-------|----------|
| 17004 | 3.67447  | 0 | 0.272148 | 0 | 1 | 4 | FALSE | ZNF395   |
| 17009 | 3.67447  | 0 | 0.272148 | 0 | 1 | 4 | FALSE | ZNF429   |
| 17011 | 3.67447  | 0 | 0.272148 | 0 | 1 | 4 | FALSE | ZNF440   |
| 17015 | 3.67447  | 0 | 0.272148 | 0 | 1 | 4 | FALSE | ZNF559   |
| 17018 | 3.67447  | 0 | 0.272148 | 0 | 1 | 4 | FALSE | ZNF607   |
| 17040 | 3.960184 | 0 | 0.252514 | 0 | 1 | 6 | FALSE | ACER3    |
| 17048 | 3.960184 | 0 | 0.252514 | 0 | 1 | 6 | FALSE | ALDH7A1  |
| 17050 | 3.960184 | 0 | 0.252514 | 0 | 1 | 6 | FALSE | ANGPTL3  |
| 17053 | 3.960184 | 0 | 0.252514 | 0 | 1 | 6 | FALSE | ARHGAP21 |
| 17061 | 3.960184 | 0 | 0.252514 | 0 | 1 | 6 | FALSE | CADM3    |
| 17067 | 3.960184 | 0 | 0.252514 | 0 | 1 | 6 | FALSE | CDC5L    |
| 17069 | 3.960184 | 0 | 0.252514 | 0 | 1 | 6 | FALSE | CDH18    |
| 17072 | 3.960184 | 0 | 0.252514 | 0 | 1 | 6 | FALSE | CDK5R1   |
| 17091 | 3.960184 | 0 | 0.252514 | 0 | 1 | 6 | FALSE | ELAVL4   |
| 17093 | 3.960184 | 0 | 0.252514 | 0 | 1 | 6 | FALSE | EML5     |
| 17095 | 3.960184 | 0 | 0.252514 | 0 | 1 | 6 | FALSE | ESRRG    |
| 17102 | 3.960184 | 0 | 0.252514 | 0 | 1 | 6 | FALSE | FRMD4A   |
| 17106 | 3.960184 | 0 | 0.252514 | 0 | 1 | 6 | FALSE | GEM      |
| 17108 | 3.960184 | 0 | 0.252514 | 0 | 1 | 6 | FALSE | GGCX     |
| 17113 | 3.960184 | 0 | 0.252514 | 0 | 1 | 6 | FALSE | GNL1     |
| 17115 | 3.960184 | 0 | 0.252514 | 0 | 1 | 6 | FALSE | GUCY1A2  |
| 17124 | 3.960184 | 0 | 0.252514 | 0 | 1 | 6 | FALSE | LONP2    |
| 17129 | 3.960184 | 0 | 0.252514 | 0 | 1 | 6 | FALSE | LUM      |
| 17142 | 3.960184 | 0 | 0.252514 | 0 | 1 | 6 | FALSE | NTRK2    |
| 17148 | 3.960184 | 0 | 0.252514 | 0 | 1 | 6 | FALSE | PDIA6    |
| 17150 | 3.960184 | 0 | 0.252514 | 0 | 1 | 6 | FALSE | PLCE1    |
| 17155 | 3.960184 | 0 | 0.252514 | 0 | 1 | 6 | FALSE | POLE3    |
| 17161 | 3.960184 | 0 | 0.252514 | 0 | 1 | 6 | FALSE | PPIP5K2  |
| 17163 | 3.960184 | 0 | 0.252514 | 0 | 1 | 6 | FALSE | PPL      |
| 17165 | 3.960184 | 0 | 0.252514 | 0 | 1 | 6 | FALSE | PREP     |
| 17169 | 3.960184 | 0 | 0.252514 | 0 | 1 | 6 | FALSE | PRPF38A  |
| 17175 | 3.960184 | 0 | 0.252514 | 0 | 1 | 6 | FALSE | RPS16    |
| 17177 | 3.960184 | 0 | 0.252514 | 0 | 1 | 6 | FALSE | RPS24    |
| 17185 | 3.960184 | 0 | 0.252514 | 0 | 1 | 6 | FALSE | SHC1     |
| 17187 | 3.960184 | 0 | 0.252514 | 0 | 1 | 6 | FALSE | SIGLEC14 |
| 17189 | 3.960184 | 0 | 0.252514 | 0 | 1 | 6 | FALSE | SLC13A4  |
| 17205 | 3.960184 | 0 | 0.252514 | 0 | 1 | 6 | FALSE | TBC1D8   |
| 17207 | 3.960184 | 0 | 0.252514 | 0 | 1 | 6 | FALSE | TM7SF3   |
| 17209 | 3.960184 | 0 | 0.252514 | 0 | 1 | 6 | FALSE | TMCC2    |
| 17215 | 3.960184 | 0 | 0.252514 | 0 | 1 | 6 | FALSE | TRA2B    |
| 17219 | 3.960184 | 0 | 0.252514 | 0 | 1 | 6 | FALSE | TYW3     |
| 17221 | 3.960184 | 0 | 0.252514 | 0 | 1 | 6 | FALSE | VCAM1    |
| 17224 | 3.960184 | 0 | 0.252514 | 0 | 1 | 6 | FALSE | WRNIP1   |
| 17237 | 3.758894 | 0 | 0.266036 | 0 | 1 | 4 | FALSE | 4-Oct    |
| 17246 | 3.758894 | 0 | 0.266036 | 0 | 1 | 4 | FALSE | ABCE1    |
| 17248 | 3.758894 | 0 | 0.266036 | 0 | 1 | 4 | FALSE | ABCG2    |
| 17253 | 3.758894 | 0 | 0.266036 | 0 | 1 | 4 | FALSE | ACP6     |

|       |          |   |          |   |   |         |          |
|-------|----------|---|----------|---|---|---------|----------|
| 17257 | 3.758894 | 0 | 0.266036 | 0 | 1 | 4 FALSE | ACTG1    |
| 17261 | 3.758894 | 0 | 0.266036 | 0 | 1 | 4 FALSE | ACVR1    |
| 17263 | 3.758894 | 0 | 0.266036 | 0 | 1 | 4 FALSE | ADAM17   |
| 17267 | 3.758894 | 0 | 0.266036 | 0 | 1 | 4 FALSE | AGPS     |
| 17269 | 3.758894 | 0 | 0.266036 | 0 | 1 | 4 FALSE | AGTRAP   |
| 17272 | 3.758894 | 0 | 0.266036 | 0 | 1 | 4 FALSE | AKAP12   |
| 17274 | 3.758894 | 0 | 0.266036 | 0 | 1 | 4 FALSE | AKIRIN1  |
| 17276 | 3.758894 | 0 | 0.266036 | 0 | 1 | 4 FALSE | AKR1B10  |
| 17281 | 3.758894 | 0 | 0.266036 | 0 | 1 | 4 FALSE | ALDH3A1  |
| 17284 | 3.758894 | 0 | 0.266036 | 0 | 1 | 4 FALSE | ALPPL2   |
| 17286 | 3.758894 | 0 | 0.266036 | 0 | 1 | 4 FALSE | ANGPT2   |
| 17289 | 3.758894 | 0 | 0.266036 | 0 | 1 | 4 FALSE | ANKRD28  |
| 17296 | 3.758894 | 0 | 0.266036 | 0 | 1 | 4 FALSE | APH1A    |
| 17303 | 3.758894 | 0 | 0.266036 | 0 | 1 | 4 FALSE | ARHGAP29 |
| 17305 | 3.758894 | 0 | 0.266036 | 0 | 1 | 4 FALSE | ARHGEF28 |
| 17307 | 3.758894 | 0 | 0.266036 | 0 | 1 | 4 FALSE | ARIH1    |
| 17320 | 3.758894 | 0 | 0.266036 | 0 | 1 | 4 FALSE | BCAT1    |
| 17322 | 3.758894 | 0 | 0.266036 | 0 | 1 | 4 FALSE | BCLAF3   |
| 17325 | 3.758894 | 0 | 0.266036 | 0 | 1 | 4 FALSE | BHLHE41  |
| 17327 | 3.758894 | 0 | 0.266036 | 0 | 1 | 4 FALSE | BIRC3    |
| 17330 | 3.758894 | 0 | 0.266036 | 0 | 1 | 4 FALSE | BMP1     |
| 17334 | 3.758894 | 0 | 0.266036 | 0 | 1 | 4 FALSE | BMP7     |
| 17338 | 3.758894 | 0 | 0.266036 | 0 | 1 | 4 FALSE | BRPF3    |
| 17340 | 3.758894 | 0 | 0.266036 | 0 | 1 | 4 FALSE | BTBD1    |
| 17345 | 3.758894 | 0 | 0.266036 | 0 | 1 | 4 FALSE | C11orf65 |
| 17349 | 3.758894 | 0 | 0.266036 | 0 | 1 | 4 FALSE | C1orf27  |
| 17351 | 3.758894 | 0 | 0.266036 | 0 | 1 | 4 FALSE | C22orf46 |
| 17353 | 3.758894 | 0 | 0.266036 | 0 | 1 | 4 FALSE | C2orf43  |
| 17356 | 3.758894 | 0 | 0.266036 | 0 | 1 | 4 FALSE | CAMK1D   |
| 17358 | 3.758894 | 0 | 0.266036 | 0 | 1 | 4 FALSE | CAMK2N1  |
| 17365 | 3.758894 | 0 | 0.266036 | 0 | 1 | 4 FALSE | CBFB     |
| 17367 | 3.758894 | 0 | 0.266036 | 0 | 1 | 4 FALSE | CCDC43   |
| 17370 | 3.758894 | 0 | 0.266036 | 0 | 1 | 4 FALSE | CCDC85C  |
| 17372 | 3.758894 | 0 | 0.266036 | 0 | 1 | 4 FALSE | CCL20    |
| 17380 | 3.758894 | 0 | 0.266036 | 0 | 1 | 4 FALSE | CD40     |
| 17383 | 3.758894 | 0 | 0.266036 | 0 | 1 | 4 FALSE | CD59     |
| 17395 | 3.758894 | 0 | 0.266036 | 0 | 1 | 4 FALSE | CEP19    |
| 17397 | 3.758894 | 0 | 0.266036 | 0 | 1 | 4 FALSE | CEP63    |
| 17400 | 3.758894 | 0 | 0.266036 | 0 | 1 | 4 FALSE | CHCHD1   |
| 17402 | 3.758894 | 0 | 0.266036 | 0 | 1 | 4 FALSE | CHCHD10  |
| 17404 | 3.758894 | 0 | 0.266036 | 0 | 1 | 4 FALSE | CIQTNF5  |
| 17408 | 3.758894 | 0 | 0.266036 | 0 | 1 | 4 FALSE | CKAP2L   |
| 17410 | 3.758894 | 0 | 0.266036 | 0 | 1 | 4 FALSE | CKAP5    |
| 17414 | 3.758894 | 0 | 0.266036 | 0 | 1 | 4 FALSE | CLINT1   |
| 17418 | 3.758894 | 0 | 0.266036 | 0 | 1 | 4 FALSE | CLUAP1   |
| 17432 | 3.758894 | 0 | 0.266036 | 0 | 1 | 4 FALSE | CPSF3    |
| 17434 | 3.758894 | 0 | 0.266036 | 0 | 1 | 4 FALSE | CRAMP1   |

|       |          |          |          |   |     |   |       |       |            |
|-------|----------|----------|----------|---|-----|---|-------|-------|------------|
| 17436 | 3.758894 | 0        | 0.266036 | 0 | 1   | 4 | FALSE |       | CRNDE      |
| 17438 | 3.758894 | 0        | 0.266036 | 0 | 1   | 4 | FALSE |       | CRNKL1     |
| 17440 | 3.758894 | 0        | 0.266036 | 0 | 1   | 4 | FALSE |       | CRYBG1     |
| 17442 | 3.758894 | 0        | 0.266036 | 0 | 1   | 4 | FALSE |       | CRYZ       |
| 17455 | 3.758894 | 0        | 0.266036 | 0 | 1   | 4 | FALSE |       | CYP2C19    |
| 17457 | 3.758894 | 0        | 0.266036 | 0 | 1   | 4 | FALSE |       | DDC        |
| 17462 | 3.758894 | 0        | 0.266036 | 0 | 1   | 4 | FALSE |       | DDR1       |
| 17464 | 3.758894 | 0        | 0.266036 | 0 | 1   | 4 | FALSE |       | DDR2       |
| 17470 | 3.758894 | 0        | 0.266036 | 0 | 1   | 4 | FALSE |       | DEK        |
| 17475 | 3.758894 | 0        | 0.266036 | 0 | 1   | 4 | FALSE |       | DHX9       |
| 17480 | 3.758894 | 0        | 0.266036 | 0 | 1   | 4 | FALSE |       | DMXL1      |
| 17483 | 3.758894 | 0        | 0.266036 | 0 | 1   | 4 | FALSE |       | DPH1       |
| 17486 | 3.758894 | 0        | 0.266036 | 0 | 1   | 4 | FALSE |       | DSP        |
| 17488 | 3.758894 | 0        | 0.266036 | 0 | 1   | 4 | FALSE |       | DTD1       |
| 17490 | 3.758894 | 0        | 0.266036 | 0 | 1   | 4 | FALSE |       | DUSP6      |
| 17495 | 3.758894 | 0        | 0.266036 | 0 | 1   | 4 | FALSE |       | EEF1A2     |
| 17500 | 3.758894 | 0        | 0.266036 | 0 | 1   | 4 | FALSE |       | EID2B      |
| 17507 | 3.758894 | 0        | 0.266036 | 0 | 1   | 4 | FALSE |       | EMC2       |
| 17512 | 3.758894 | 0        | 0.266036 | 0 | 1   | 4 | FALSE |       | ENSG00000  |
| 17516 | 3.758894 | 0        | 0.266036 | 0 | 1   | 4 | FALSE |       | EPAS1      |
| 17518 | 3.758894 | 0        | 0.266036 | 0 | 1   | 4 | FALSE |       | EPHX1      |
| 17524 | 3.758894 | 0        | 0.266036 | 0 | 1   | 4 | FALSE |       | ERG        |
| 17526 | 3.758894 | 0        | 0.266036 | 0 | 1   | 4 | FALSE |       | ERLIN1     |
| 17533 | 3.758894 | 0        | 0.266036 | 0 | 1   | 4 | FALSE |       | ETS1       |
| 17535 | 3.758894 | 0        | 0.266036 | 0 | 1   | 4 | FALSE |       | ETV5       |
| 17539 | 3.758894 | 0        | 0.266036 | 0 | 1   | 4 | FALSE |       | EXOC4      |
| 17541 | 3.758894 | 0        | 0.266036 | 0 | 1   | 4 | FALSE |       | F11R       |
| 19289 | 2.781935 | 0.076332 | 0.359462 | 0 | 583 | 3 | FALSE | miRNA | hsa-miR-14 |
| 17543 | 3.758894 | 0        | 0.266036 | 0 | 1   | 4 | FALSE |       | FAM120A    |
| 17546 | 3.758894 | 0        | 0.266036 | 0 | 1   | 4 | FALSE |       | FAM20C     |
| 17550 | 3.758894 | 0        | 0.266036 | 0 | 1   | 4 | FALSE |       | FAM45A     |
| 17553 | 3.758894 | 0        | 0.266036 | 0 | 1   | 4 | FALSE |       | FAM79B     |
| 17555 | 3.758894 | 0        | 0.266036 | 0 | 1   | 4 | FALSE |       | FARP1      |
| 17558 | 3.758894 | 0        | 0.266036 | 0 | 1   | 4 | FALSE |       | FDFT1      |
| 17560 | 3.758894 | 0        | 0.266036 | 0 | 1   | 4 | FALSE |       | FGFBP1     |
| 17567 | 3.758894 | 0        | 0.266036 | 0 | 1   | 4 | FALSE |       | FOXC2      |
| 17572 | 3.758894 | 0        | 0.266036 | 0 | 1   | 4 | FALSE |       | FSD1L      |
| 17574 | 3.758894 | 0        | 0.266036 | 0 | 1   | 4 | FALSE |       | FST        |
| 17576 | 3.758894 | 0        | 0.266036 | 0 | 1   | 4 | FALSE |       | FUBP1      |
| 17581 | 3.758894 | 0        | 0.266036 | 0 | 1   | 4 | FALSE |       | FZD7       |
| 17584 | 3.758894 | 0        | 0.266036 | 0 | 1   | 4 | FALSE |       | GANC       |
| 17589 | 3.758894 | 0        | 0.266036 | 0 | 1   | 4 | FALSE |       | GLUD1      |
| 17596 | 3.758894 | 0        | 0.266036 | 0 | 1   | 4 | FALSE |       | GNG11      |
| 17598 | 3.758894 | 0        | 0.266036 | 0 | 1   | 4 | FALSE |       | GNL3       |
| 17600 | 3.758894 | 0        | 0.266036 | 0 | 1   | 4 | FALSE |       | GOLGB1     |
| 17604 | 3.758894 | 0        | 0.266036 | 0 | 1   | 4 | FALSE |       | GOLPH2     |
| 17608 | 3.758894 | 0        | 0.266036 | 0 | 1   | 4 | FALSE |       | GPSM2      |



|       |          |   |          |   |   |         |           |
|-------|----------|---|----------|---|---|---------|-----------|
| 17612 | 3.758894 | 0 | 0.266036 | 0 | 1 | 4 FALSE | GSC       |
| 17615 | 3.758894 | 0 | 0.266036 | 0 | 1 | 4 FALSE | HBEGF     |
| 17618 | 3.758894 | 0 | 0.266036 | 0 | 1 | 4 FALSE | HDAC11    |
| 17625 | 3.758894 | 0 | 0.266036 | 0 | 1 | 4 FALSE | HELB      |
| 17633 | 3.758894 | 0 | 0.266036 | 0 | 1 | 4 FALSE | HIST1H2BF |
| 17636 | 3.758894 | 0 | 0.266036 | 0 | 1 | 4 FALSE | HLTF      |
| 17642 | 3.758894 | 0 | 0.266036 | 0 | 1 | 4 FALSE | HMGA2     |
| 17647 | 3.758894 | 0 | 0.266036 | 0 | 1 | 4 FALSE | HPS3      |
| 17650 | 3.758894 | 0 | 0.266036 | 0 | 1 | 4 FALSE | HSPA4     |
| 17658 | 3.758894 | 0 | 0.266036 | 0 | 1 | 4 FALSE | IFI30     |
| 17660 | 3.758894 | 0 | 0.266036 | 0 | 1 | 4 FALSE | IFNB1     |
| 17666 | 3.758894 | 0 | 0.266036 | 0 | 1 | 4 FALSE | IL1RN     |
| 17670 | 3.758894 | 0 | 0.266036 | 0 | 1 | 4 FALSE | ILK       |
| 17672 | 3.758894 | 0 | 0.266036 | 0 | 1 | 4 FALSE | IMMP2L    |
| 17684 | 3.758894 | 0 | 0.266036 | 0 | 1 | 4 FALSE | ITGA5     |
| 17686 | 3.758894 | 0 | 0.266036 | 0 | 1 | 4 FALSE | ITGAV     |
| 17699 | 3.758894 | 0 | 0.266036 | 0 | 1 | 4 FALSE | KCNB2     |
| 17703 | 3.758894 | 0 | 0.266036 | 0 | 1 | 4 FALSE | KDM3A     |
| 17705 | 3.758894 | 0 | 0.266036 | 0 | 1 | 4 FALSE | KDM5A     |
| 17709 | 3.758894 | 0 | 0.266036 | 0 | 1 | 4 FALSE | KIF21A    |
| 17715 | 3.758894 | 0 | 0.266036 | 0 | 1 | 4 FALSE | KREMEN1   |
| 17717 | 3.758894 | 0 | 0.266036 | 0 | 1 | 4 FALSE | KRT14     |
| 17719 | 3.758894 | 0 | 0.266036 | 0 | 1 | 4 FALSE | KRT19     |
| 17721 | 3.758894 | 0 | 0.266036 | 0 | 1 | 4 FALSE | KRT7      |
| 17724 | 3.758894 | 0 | 0.266036 | 0 | 1 | 4 FALSE | KTN1      |
| 17734 | 3.758894 | 0 | 0.266036 | 0 | 1 | 4 FALSE | LOC203547 |
| 17736 | 3.758894 | 0 | 0.266036 | 0 | 1 | 4 FALSE | LOC340888 |
| 17738 | 3.758894 | 0 | 0.266036 | 0 | 1 | 4 FALSE | LOC342705 |
| 17740 | 3.758894 | 0 | 0.266036 | 0 | 1 | 4 FALSE | LOC400011 |
| 17742 | 3.758894 | 0 | 0.266036 | 0 | 1 | 4 FALSE | LRRC59    |
| 17751 | 3.758894 | 0 | 0.266036 | 0 | 1 | 4 FALSE | MAP1LC3B  |
| 17753 | 3.758894 | 0 | 0.266036 | 0 | 1 | 4 FALSE | MAP2K4    |
| 17755 | 3.758894 | 0 | 0.266036 | 0 | 1 | 4 FALSE | MAP2K6    |
| 17757 | 3.758894 | 0 | 0.266036 | 0 | 1 | 4 FALSE | MAP3K11   |
| 17759 | 3.758894 | 0 | 0.266036 | 0 | 1 | 4 FALSE | MAP3K3    |
| 17763 | 3.758894 | 0 | 0.266036 | 0 | 1 | 4 FALSE | MAP4K2    |
| 17765 | 3.758894 | 0 | 0.266036 | 0 | 1 | 4 FALSE | MAP4K4    |
| 17768 | 3.758894 | 0 | 0.266036 | 0 | 1 | 4 FALSE | MAPK4     |
| 17773 | 3.758894 | 0 | 0.266036 | 0 | 1 | 4 FALSE | MCM5      |
| 17776 | 3.758894 | 0 | 0.266036 | 0 | 1 | 4 FALSE | MEST      |
| 17778 | 3.758894 | 0 | 0.266036 | 0 | 1 | 4 FALSE | MIB1      |
| 17780 | 3.758894 | 0 | 0.266036 | 0 | 1 | 4 FALSE | MIOS      |
| 17786 | 3.758894 | 0 | 0.266036 | 0 | 1 | 4 FALSE | MMP1      |
| 17788 | 3.758894 | 0 | 0.266036 | 0 | 1 | 4 FALSE | MMP12     |
| 17792 | 3.758894 | 0 | 0.266036 | 0 | 1 | 4 FALSE | MMP3      |
| 17795 | 3.758894 | 0 | 0.266036 | 0 | 1 | 4 FALSE | MSH3      |
| 17798 | 3.758894 | 0 | 0.266036 | 0 | 1 | 4 FALSE | MST1R     |

|       |          |          |          |   |      |   |       |       |            |
|-------|----------|----------|----------|---|------|---|-------|-------|------------|
| 17801 | 3.758894 | 0        | 0.266036 | 0 | 1    | 4 | FALSE |       | MTMR14     |
| 17803 | 3.758894 | 0        | 0.266036 | 0 | 1    | 4 | FALSE |       | MTR        |
| 17805 | 3.758894 | 0        | 0.266036 | 0 | 1    | 4 | FALSE |       | MUC1       |
| 17807 | 3.758894 | 0        | 0.266036 | 0 | 1    | 4 | FALSE |       | MUC19      |
| 17809 | 3.758894 | 0        | 0.266036 | 0 | 1    | 4 | FALSE |       | MUC4       |
| 17816 | 3.758894 | 0        | 0.266036 | 0 | 1    | 4 | FALSE |       | MYOCD      |
| 17818 | 3.758894 | 0        | 0.266036 | 0 | 1    | 4 | FALSE |       | MYOF       |
| 17823 | 3.758894 | 0        | 0.266036 | 0 | 1    | 4 | FALSE |       | NAIP       |
| 17828 | 3.758894 | 0        | 0.266036 | 0 | 1    | 4 | FALSE |       | NAP1L4     |
| 17830 | 3.758894 | 0        | 0.266036 | 0 | 1    | 4 | FALSE |       | NCAPD3     |
| 17835 | 3.758894 | 0        | 0.266036 | 0 | 1    | 4 | FALSE |       | NDRG2      |
| 17837 | 3.758894 | 0        | 0.266036 | 0 | 1    | 4 | FALSE |       | NDUFA4     |
| 17839 | 3.758894 | 0        | 0.266036 | 0 | 1    | 4 | FALSE |       | NDUFS1     |
| 17841 | 3.758894 | 0        | 0.266036 | 0 | 1    | 4 | FALSE |       | NDUFS2     |
| 17843 | 3.758894 | 0        | 0.266036 | 0 | 1    | 4 | FALSE |       | NEDD9      |
| 17847 | 3.758894 | 0        | 0.266036 | 0 | 1    | 4 | FALSE |       | NFIL3      |
| 17849 | 3.758894 | 0        | 0.266036 | 0 | 1    | 4 | FALSE |       | NHEDCI     |
| 19956 | 2.38894  | 0.383134 | 0.418596 | 0 | 1649 | 3 | FALSE | miRNA | hsa-miR-15 |
| 17853 | 3.758894 | 0        | 0.266036 | 0 | 1    | 4 | FALSE |       | NHSL1      |
| 17857 | 3.758894 | 0        | 0.266036 | 0 | 1    | 4 | FALSE |       | NOB1       |
| 17859 | 3.758894 | 0        | 0.266036 | 0 | 1    | 4 | FALSE |       | NODAL      |
| 17861 | 3.758894 | 0        | 0.266036 | 0 | 1    | 4 | FALSE |       | NOL11      |
| 17863 | 3.758894 | 0        | 0.266036 | 0 | 1    | 4 | FALSE |       | NOSTRIN    |
| 17871 | 3.758894 | 0        | 0.266036 | 0 | 1    | 4 | FALSE |       | NUDT1      |
| 17873 | 3.758894 | 0        | 0.266036 | 0 | 1    | 4 | FALSE |       | NUDT13     |
| 17876 | 3.758894 | 0        | 0.266036 | 0 | 1    | 4 | FALSE |       | NUP107     |
| 17885 | 3.758894 | 0        | 0.266036 | 0 | 1    | 4 | FALSE |       | P4HA1      |
| 17887 | 3.758894 | 0        | 0.266036 | 0 | 1    | 4 | FALSE |       | PADI1      |
| 17890 | 3.758894 | 0        | 0.266036 | 0 | 1    | 4 | FALSE |       | PAK1       |
| 17892 | 3.758894 | 0        | 0.266036 | 0 | 1    | 4 | FALSE |       | PAK4       |
| 17894 | 3.758894 | 0        | 0.266036 | 0 | 1    | 4 | FALSE |       | PAN2       |
| 17900 | 3.758894 | 0        | 0.266036 | 0 | 1    | 4 | FALSE |       | PARP8      |
| 17902 | 3.758894 | 0        | 0.266036 | 0 | 1    | 4 | FALSE |       | PCMTD1     |
| 17904 | 3.758894 | 0        | 0.266036 | 0 | 1    | 4 | FALSE |       | PCSK5      |
| 17907 | 3.758894 | 0        | 0.266036 | 0 | 1    | 4 | FALSE |       | PDGFD      |
| 17912 | 3.758894 | 0        | 0.266036 | 0 | 1    | 4 | FALSE |       | PIGF       |
| 17917 | 3.758894 | 0        | 0.266036 | 0 | 1    | 4 | FALSE |       | PLAT       |
| 17920 | 3.758894 | 0        | 0.266036 | 0 | 1    | 4 | FALSE |       | PLEK2      |
| 17924 | 3.758894 | 0        | 0.266036 | 0 | 1    | 4 | FALSE |       | PLXNB2     |
| 17926 | 3.758894 | 0        | 0.266036 | 0 | 1    | 4 | FALSE |       | PMM2       |
| 17928 | 3.758894 | 0        | 0.266036 | 0 | 1    | 4 | FALSE |       | PNMA3      |
| 17932 | 3.758894 | 0        | 0.266036 | 0 | 1    | 4 | FALSE |       | POSTN      |
| 17934 | 3.758894 | 0        | 0.266036 | 0 | 1    | 4 | FALSE |       | POU5F1     |
| 17937 | 3.758894 | 0        | 0.266036 | 0 | 1    | 4 | FALSE |       | PPP3CA     |
| 17943 | 3.758894 | 0        | 0.266036 | 0 | 1    | 4 | FALSE |       | PRKCA      |
| 17945 | 3.758894 | 0        | 0.266036 | 0 | 1    | 4 | FALSE |       | PRPF40A    |
| 17952 | 3.758894 | 0        | 0.266036 | 0 | 1    | 4 | FALSE |       | PSAT1      |

|       |          |   |          |   |   |         |          |
|-------|----------|---|----------|---|---|---------|----------|
| 17956 | 3.758894 | 0 | 0.266036 | 0 | 1 | 4 FALSE | PTK2     |
| 17959 | 3.758894 | 0 | 0.266036 | 0 | 1 | 4 FALSE | PTP4A2   |
| 17961 | 3.758894 | 0 | 0.266036 | 0 | 1 | 4 FALSE | PTRF     |
| 17964 | 3.758894 | 0 | 0.266036 | 0 | 1 | 4 FALSE | PXN      |
| 17975 | 3.758894 | 0 | 0.266036 | 0 | 1 | 4 FALSE | RAD50    |
| 17979 | 3.758894 | 0 | 0.266036 | 0 | 1 | 4 FALSE | RBM18    |
| 17981 | 3.758894 | 0 | 0.266036 | 0 | 1 | 4 FALSE | RBM6     |
| 17983 | 3.758894 | 0 | 0.266036 | 0 | 1 | 4 FALSE | RCAN1    |
| 17988 | 3.758894 | 0 | 0.266036 | 0 | 1 | 4 FALSE | RGS2     |
| 17992 | 3.758894 | 0 | 0.266036 | 0 | 1 | 4 FALSE | RING1    |
| 17995 | 3.758894 | 0 | 0.266036 | 0 | 1 | 4 FALSE | RNF169   |
| 17999 | 3.758894 | 0 | 0.266036 | 0 | 1 | 4 FALSE | ROBO2    |
| 18004 | 3.758894 | 0 | 0.266036 | 0 | 1 | 4 FALSE | RPA1     |
| 18006 | 3.758894 | 0 | 0.266036 | 0 | 1 | 4 FALSE | RPL24    |
| 18009 | 3.758894 | 0 | 0.266036 | 0 | 1 | 4 FALSE | RPS6KB1  |
| 18016 | 3.758894 | 0 | 0.266036 | 0 | 1 | 4 FALSE | RTKN     |
| 18018 | 3.758894 | 0 | 0.266036 | 0 | 1 | 4 FALSE | SOCS7    |
| 18020 | 3.758894 | 0 | 0.266036 | 0 | 1 | 4 FALSE | SAMD5    |
| 18022 | 3.758894 | 0 | 0.266036 | 0 | 1 | 4 FALSE | SASH1    |
| 18026 | 3.758894 | 0 | 0.266036 | 0 | 1 | 4 FALSE | SEN1     |
| 18041 | 3.758894 | 0 | 0.266036 | 0 | 1 | 4 FALSE | SH3GLB2  |
| 18045 | 3.758894 | 0 | 0.266036 | 0 | 1 | 4 FALSE | SIN3A    |
| 18049 | 3.758894 | 0 | 0.266036 | 0 | 1 | 4 FALSE | SIRPA    |
| 18051 | 3.758894 | 0 | 0.266036 | 0 | 1 | 4 FALSE | SLC16A10 |
| 18053 | 3.758894 | 0 | 0.266036 | 0 | 1 | 4 FALSE | SLC16A5  |
| 18055 | 3.758894 | 0 | 0.266036 | 0 | 1 | 4 FALSE | SLC16A6  |
| 18057 | 3.758894 | 0 | 0.266036 | 0 | 1 | 4 FALSE | SLC22A9  |
| 18066 | 3.758894 | 0 | 0.266036 | 0 | 1 | 4 FALSE | SLC40A1  |
| 18076 | 3.758894 | 0 | 0.266036 | 0 | 1 | 4 FALSE | SMIM17   |
| 18082 | 3.758894 | 0 | 0.266036 | 0 | 1 | 4 FALSE | SNAI3    |
| 18084 | 3.758894 | 0 | 0.266036 | 0 | 1 | 4 FALSE | SNTB1    |
| 18086 | 3.758894 | 0 | 0.266036 | 0 | 1 | 4 FALSE | SNW1     |
| 18088 | 3.758894 | 0 | 0.266036 | 0 | 1 | 4 FALSE | SNX24    |
| 18093 | 3.758894 | 0 | 0.266036 | 0 | 1 | 4 FALSE | SOX10    |
| 18100 | 3.758894 | 0 | 0.266036 | 0 | 1 | 4 FALSE | SP100    |
| 18102 | 3.758894 | 0 | 0.266036 | 0 | 1 | 4 FALSE | SP4      |
| 18104 | 3.758894 | 0 | 0.266036 | 0 | 1 | 4 FALSE | SP7      |
| 18106 | 3.758894 | 0 | 0.266036 | 0 | 1 | 4 FALSE | SPARC    |
| 18111 | 3.758894 | 0 | 0.266036 | 0 | 1 | 4 FALSE | SPTLC1   |
| 18113 | 3.758894 | 0 | 0.266036 | 0 | 1 | 4 FALSE | SPTY2D1  |
| 18120 | 3.758894 | 0 | 0.266036 | 0 | 1 | 4 FALSE | ST3GAL1  |
| 18126 | 3.758894 | 0 | 0.266036 | 0 | 1 | 4 FALSE | STAU1    |
| 18128 | 3.758894 | 0 | 0.266036 | 0 | 1 | 4 FALSE | STEAP1   |
| 18130 | 3.758894 | 0 | 0.266036 | 0 | 1 | 4 FALSE | STK3     |
| 18132 | 3.758894 | 0 | 0.266036 | 0 | 1 | 4 FALSE | STOM     |
| 18134 | 3.758894 | 0 | 0.266036 | 0 | 1 | 4 FALSE | STX17    |
| 18136 | 3.758894 | 0 | 0.266036 | 0 | 1 | 4 FALSE | SVEP1    |

|       |          |   |          |   |   |         |          |
|-------|----------|---|----------|---|---|---------|----------|
| 18138 | 3.758894 | 0 | 0.266036 | 0 | 1 | 4 FALSE | SWAP70   |
| 18142 | 3.758894 | 0 | 0.266036 | 0 | 1 | 4 FALSE | TAGLN2   |
| 18146 | 3.758894 | 0 | 0.266036 | 0 | 1 | 4 FALSE | TARDBP   |
| 18148 | 3.758894 | 0 | 0.266036 | 0 | 1 | 4 FALSE | TBC1D22B |
| 18150 | 3.758894 | 0 | 0.266036 | 0 | 1 | 4 FALSE | TCF3     |
| 18154 | 3.758894 | 0 | 0.266036 | 0 | 1 | 4 FALSE | TCTN1    |
| 18156 | 3.758894 | 0 | 0.266036 | 0 | 1 | 4 FALSE | TFPI2    |
| 18162 | 3.758894 | 0 | 0.266036 | 0 | 1 | 4 FALSE | TGFB3    |
| 18168 | 3.758894 | 0 | 0.266036 | 0 | 1 | 4 FALSE | THSD7A   |
| 18170 | 3.758894 | 0 | 0.266036 | 0 | 1 | 4 FALSE | THUMPD1  |
| 18174 | 3.758894 | 0 | 0.266036 | 0 | 1 | 4 FALSE | TIPRL    |
| 18176 | 3.758894 | 0 | 0.266036 | 0 | 1 | 4 FALSE | TIRAP    |
| 18179 | 3.758894 | 0 | 0.266036 | 0 | 1 | 4 FALSE | TLR6     |
| 18183 | 3.758894 | 0 | 0.266036 | 0 | 1 | 4 FALSE | TMEM123  |
| 18185 | 3.758894 | 0 | 0.266036 | 0 | 1 | 4 FALSE | TMEM132  |
| 18190 | 3.758894 | 0 | 0.266036 | 0 | 1 | 4 FALSE | TMEM50A  |
| 18194 | 3.758894 | 0 | 0.266036 | 0 | 1 | 4 FALSE | TMOD2    |
| 18198 | 3.758894 | 0 | 0.266036 | 0 | 1 | 4 FALSE | TNC      |
| 18201 | 3.758894 | 0 | 0.266036 | 0 | 1 | 4 FALSE | TNFSF13  |
| 18203 | 3.758894 | 0 | 0.266036 | 0 | 1 | 4 FALSE | TNR      |
| 18206 | 3.758894 | 0 | 0.266036 | 0 | 1 | 4 FALSE | TP53BP1  |
| 18209 | 3.758894 | 0 | 0.266036 | 0 | 1 | 4 FALSE | TPP2     |
| 18211 | 3.758894 | 0 | 0.266036 | 0 | 1 | 4 FALSE | TPRG1    |
| 18213 | 3.758894 | 0 | 0.266036 | 0 | 1 | 4 FALSE | TRAPPC1  |
| 18215 | 3.758894 | 0 | 0.266036 | 0 | 1 | 4 FALSE | TRAPPC9  |
| 18219 | 3.758894 | 0 | 0.266036 | 0 | 1 | 4 FALSE | TRIM44   |
| 18225 | 3.758894 | 0 | 0.266036 | 0 | 1 | 4 FALSE | TUG1     |
| 18228 | 3.758894 | 0 | 0.266036 | 0 | 1 | 4 FALSE | TWIST1   |
| 18230 | 3.758894 | 0 | 0.266036 | 0 | 1 | 4 FALSE | UBE2L6   |
| 18236 | 3.758894 | 0 | 0.266036 | 0 | 1 | 4 FALSE | UBR7     |
| 18240 | 3.758894 | 0 | 0.266036 | 0 | 1 | 4 FALSE | UNC5D    |
| 18247 | 3.758894 | 0 | 0.266036 | 0 | 1 | 4 FALSE | VEZF1    |
| 18251 | 3.758894 | 0 | 0.266036 | 0 | 1 | 4 FALSE | VIM      |
| 18253 | 3.758894 | 0 | 0.266036 | 0 | 1 | 4 FALSE | VPS13A   |
| 18255 | 3.758894 | 0 | 0.266036 | 0 | 1 | 4 FALSE | VPS51    |
| 18257 | 3.758894 | 0 | 0.266036 | 0 | 1 | 4 FALSE | WASHC2C  |
| 18260 | 3.758894 | 0 | 0.266036 | 0 | 1 | 4 FALSE | WNT11    |
| 18262 | 3.758894 | 0 | 0.266036 | 0 | 1 | 4 FALSE | WNT5A    |
| 18264 | 3.758894 | 0 | 0.266036 | 0 | 1 | 4 FALSE | WNT5B    |
| 18276 | 3.758894 | 0 | 0.266036 | 0 | 1 | 4 FALSE | ZCCHC14  |
| 18284 | 3.758894 | 0 | 0.266036 | 0 | 1 | 4 FALSE | ZFAND3   |
| 18298 | 3.758894 | 0 | 0.266036 | 0 | 1 | 4 FALSE | ZNF445   |
| 18303 | 3.758894 | 0 | 0.266036 | 0 | 1 | 4 FALSE | ZNF660   |
| 18334 | 3.778065 | 0 | 0.264686 | 0 | 1 | 4 FALSE | AF086511 |
| 18337 | 3.778065 | 0 | 0.264686 | 0 | 1 | 4 FALSE | AK022044 |
| 18339 | 3.778065 | 0 | 0.264686 | 0 | 1 | 4 FALSE | AK026784 |
| 18341 | 3.778065 | 0 | 0.264686 | 0 | 1 | 4 FALSE | AK057704 |

|       |          |   |          |   |   |   |       |           |
|-------|----------|---|----------|---|---|---|-------|-----------|
| 18347 | 3.778065 | 0 | 0.264686 | 0 | 1 | 4 | FALSE | ALP       |
| 18393 | 3.778065 | 0 | 0.264686 | 0 | 1 | 4 | FALSE | BCL2A1    |
| 18399 | 3.778065 | 0 | 0.264686 | 0 | 1 | 4 | FALSE | BG547557  |
| 18401 | 3.778065 | 0 | 0.264686 | 0 | 1 | 4 | FALSE | BGLAP     |
| 18403 | 3.778065 | 0 | 0.264686 | 0 | 1 | 4 | FALSE | BRCA1     |
| 18405 | 3.778065 | 0 | 0.264686 | 0 | 1 | 4 | FALSE | BRCA2     |
| 18424 | 3.778065 | 0 | 0.264686 | 0 | 1 | 4 | FALSE | C1orf21   |
| 18439 | 3.778065 | 0 | 0.264686 | 0 | 1 | 4 | FALSE | CASP7     |
| 18446 | 3.778065 | 0 | 0.264686 | 0 | 1 | 4 | FALSE | CCL5      |
| 18454 | 3.778065 | 0 | 0.264686 | 0 | 1 | 4 | FALSE | CCR9      |
| 18458 | 3.778065 | 0 | 0.264686 | 0 | 1 | 4 | FALSE | CD40LG    |
| 18460 | 3.778065 | 0 | 0.264686 | 0 | 1 | 4 | FALSE | CD80      |
| 18472 | 3.778065 | 0 | 0.264686 | 0 | 1 | 4 | FALSE | CDKN3     |
| 18490 | 3.778065 | 0 | 0.264686 | 0 | 1 | 4 | FALSE | CNOT6L    |
| 18496 | 3.778065 | 0 | 0.264686 | 0 | 1 | 4 | FALSE | CPM       |
| 18500 | 3.778065 | 0 | 0.264686 | 0 | 1 | 4 | FALSE | CPNE3     |
| 18505 | 3.778065 | 0 | 0.264686 | 0 | 1 | 4 | FALSE | CXCL8     |
| 18507 | 3.778065 | 0 | 0.264686 | 0 | 1 | 4 | FALSE | CXCR4     |
| 18540 | 3.778065 | 0 | 0.264686 | 0 | 1 | 4 | FALSE | DNAPTP6   |
| 18564 | 3.778065 | 0 | 0.264686 | 0 | 1 | 4 | FALSE | ENSG00000 |
| 18570 | 3.778065 | 0 | 0.264686 | 0 | 1 | 4 | FALSE | EPSTI1    |
| 18580 | 3.778065 | 0 | 0.264686 | 0 | 1 | 4 | FALSE | FADD      |
| 18582 | 3.778065 | 0 | 0.264686 | 0 | 1 | 4 | FALSE | FAF1      |
| 18599 | 3.778065 | 0 | 0.264686 | 0 | 1 | 4 | FALSE | FLJ10986  |
| 18611 | 3.778065 | 0 | 0.264686 | 0 | 1 | 4 | FALSE | GIMAP4    |
| 18637 | 3.778065 | 0 | 0.264686 | 0 | 1 | 4 | FALSE | HDAC7     |
| 18661 | 3.778065 | 0 | 0.264686 | 0 | 1 | 4 | FALSE | HOXD10    |
| 18667 | 3.778065 | 0 | 0.264686 | 0 | 1 | 4 | FALSE | ICAM1     |
| 18672 | 3.778065 | 0 | 0.264686 | 0 | 1 | 4 | FALSE | IFI27     |
| 18674 | 3.778065 | 0 | 0.264686 | 0 | 1 | 4 | FALSE | IFI44     |
| 18676 | 3.778065 | 0 | 0.264686 | 0 | 1 | 4 | FALSE | IFI44L    |
| 18681 | 3.778065 | 0 | 0.264686 | 0 | 1 | 4 | FALSE | IFIT5     |
| 18690 | 3.778065 | 0 | 0.264686 | 0 | 1 | 4 | FALSE | IL-12p40  |
| 18706 | 3.778065 | 0 | 0.264686 | 0 | 1 | 4 | FALSE | IRAK2     |
| 18710 | 3.778065 | 0 | 0.264686 | 0 | 1 | 4 | FALSE | IRF7      |
| 18712 | 3.778065 | 0 | 0.264686 | 0 | 1 | 4 | FALSE | IS2       |
| 18714 | 3.778065 | 0 | 0.264686 | 0 | 1 | 4 | FALSE | ISG15     |
| 18719 | 3.778065 | 0 | 0.264686 | 0 | 1 | 4 | FALSE | ITGB2     |
| 18731 | 3.778065 | 0 | 0.264686 | 0 | 1 | 4 | FALSE | KDM2B     |
| 18740 | 3.778065 | 0 | 0.264686 | 0 | 1 | 4 | FALSE | KIF22     |
| 18753 | 3.778065 | 0 | 0.264686 | 0 | 1 | 4 | FALSE | L1CAM     |
| 18755 | 3.778065 | 0 | 0.264686 | 0 | 1 | 4 | FALSE | LAMC2     |
| 18765 | 3.778065 | 0 | 0.264686 | 0 | 1 | 4 | FALSE | LIN52     |
| 18767 | 3.778065 | 0 | 0.264686 | 0 | 1 | 4 | FALSE | LINC00304 |
| 18769 | 3.778065 | 0 | 0.264686 | 0 | 1 | 4 | FALSE | LMO2      |
| 18774 | 3.778065 | 0 | 0.264686 | 0 | 1 | 4 | FALSE | LRP2      |
| 18815 | 3.778065 | 0 | 0.264686 | 0 | 1 | 4 | FALSE | MIF       |

|       |          |   |          |   |   |         |            |
|-------|----------|---|----------|---|---|---------|------------|
| 18830 | 3.778065 | 0 | 0.264686 | 0 | 1 | 4 FALSE | MSC        |
| 18836 | 3.778065 | 0 | 0.264686 | 0 | 1 | 4 FALSE | MTUS2      |
| 18839 | 3.778065 | 0 | 0.264686 | 0 | 1 | 4 FALSE | MX2        |
| 18861 | 3.778065 | 0 | 0.264686 | 0 | 1 | 4 FALSE | NFIX       |
| 18878 | 3.778065 | 0 | 0.264686 | 0 | 1 | 4 FALSE | NUMB       |
| 18884 | 3.778065 | 0 | 0.264686 | 0 | 1 | 4 FALSE | OASL       |
| 18887 | 3.778065 | 0 | 0.264686 | 0 | 1 | 4 FALSE | OCN        |
| 18892 | 3.778065 | 0 | 0.264686 | 0 | 1 | 4 FALSE | OPN        |
| 18894 | 3.778065 | 0 | 0.264686 | 0 | 1 | 4 FALSE | OSBPL1A    |
| 18900 | 3.778065 | 0 | 0.264686 | 0 | 1 | 4 FALSE | PA2G4      |
| 18933 | 3.778065 | 0 | 0.264686 | 0 | 1 | 4 FALSE | PLAUR      |
| 18949 | 3.778065 | 0 | 0.264686 | 0 | 1 | 4 FALSE | PPP1R1C    |
| 18969 | 3.778065 | 0 | 0.264686 | 0 | 1 | 4 FALSE | PTGES2     |
| 18983 | 3.778065 | 0 | 0.264686 | 0 | 1 | 4 FALSE | RAD54L     |
| 18989 | 3.778065 | 0 | 0.264686 | 0 | 1 | 4 FALSE | RAG1       |
| 19007 | 3.778065 | 0 | 0.264686 | 0 | 1 | 4 FALSE | RGS13      |
| 19012 | 3.778065 | 0 | 0.264686 | 0 | 1 | 4 FALSE | RHO        |
| 19022 | 3.778065 | 0 | 0.264686 | 0 | 1 | 4 FALSE | ROBO1      |
| 19034 | 3.778065 | 0 | 0.264686 | 0 | 1 | 4 FALSE | RSAD2      |
| 19040 | 3.778065 | 0 | 0.264686 | 0 | 1 | 4 FALSE | SAMD9L     |
| 19092 | 3.778065 | 0 | 0.264686 | 0 | 1 | 4 FALSE | SLPI       |
| 19098 | 3.778065 | 0 | 0.264686 | 0 | 1 | 4 FALSE | SMN1       |
| 19101 | 3.778065 | 0 | 0.264686 | 0 | 1 | 4 FALSE | SNTG2      |
| 19146 | 3.778065 | 0 | 0.264686 | 0 | 1 | 4 FALSE | SYT12      |
| 19152 | 3.778065 | 0 | 0.264686 | 0 | 1 | 4 FALSE | TFF3       |
| 19159 | 3.778065 | 0 | 0.264686 | 0 | 1 | 4 FALSE | THC224794  |
| 19181 | 3.778065 | 0 | 0.264686 | 0 | 1 | 4 FALSE | TMTC2      |
| 19201 | 3.778065 | 0 | 0.264686 | 0 | 1 | 4 FALSE | TRIM22     |
| 19226 | 3.778065 | 0 | 0.264686 | 0 | 1 | 4 FALSE | VWCE       |
| 19228 | 3.778065 | 0 | 0.264686 | 0 | 1 | 4 FALSE | WASF2      |
| 19241 | 3.778065 | 0 | 0.264686 | 0 | 1 | 4 FALSE | ZBTB32     |
| 19247 | 3.778065 | 0 | 0.264686 | 0 | 1 | 4 FALSE | ZDHHC13    |
| 19287 | 3.778065 | 0 | 0.264686 | 0 | 1 | 4 FALSE | ????????(P |
| 19321 | 3.781751 | 0 | 0.264428 | 0 | 1 | 4 FALSE | ASAP2      |
| 19332 | 3.781751 | 0 | 0.264428 | 0 | 1 | 4 FALSE | ATR        |
| 19350 | 3.781751 | 0 | 0.264428 | 0 | 1 | 4 FALSE | BLOC1S2    |
| 19369 | 3.781751 | 0 | 0.264428 | 0 | 1 | 4 FALSE | CARD11     |
| 19374 | 3.781751 | 0 | 0.264428 | 0 | 1 | 4 FALSE | CASR       |
| 19381 | 3.781751 | 0 | 0.264428 | 0 | 1 | 4 FALSE | CCL3       |
| 19385 | 3.781751 | 0 | 0.264428 | 0 | 1 | 4 FALSE | CD276      |
| 19394 | 3.781751 | 0 | 0.264428 | 0 | 1 | 4 FALSE | CDC42      |
| 19397 | 3.781751 | 0 | 0.264428 | 0 | 1 | 4 FALSE | CDK5RAP1   |
| 19402 | 3.781751 | 0 | 0.264428 | 0 | 1 | 4 FALSE | CENPU      |
| 19410 | 3.781751 | 0 | 0.264428 | 0 | 1 | 4 FALSE | COL4A1     |
| 19414 | 3.781751 | 0 | 0.264428 | 0 | 1 | 4 FALSE | COPS2      |
| 19416 | 3.781751 | 0 | 0.264428 | 0 | 1 | 4 FALSE | COX1       |
| 19425 | 3.781751 | 0 | 0.264428 | 0 | 1 | 4 FALSE | CSNK1E     |

|       |          |   |          |   |   |         |           |
|-------|----------|---|----------|---|---|---------|-----------|
| 19460 | 3.781751 | 0 | 0.264428 | 0 | 1 | 4 FALSE | ENSG00000 |
| 19470 | 3.781751 | 0 | 0.264428 | 0 | 1 | 4 FALSE | EXOC6B    |
| 19476 | 3.781751 | 0 | 0.264428 | 0 | 1 | 4 FALSE | FAM98B    |
| 19487 | 3.781751 | 0 | 0.264428 | 0 | 1 | 4 FALSE | FBXO34    |
| 19490 | 3.781751 | 0 | 0.264428 | 0 | 1 | 4 FALSE | FLNA      |
| 19494 | 3.781751 | 0 | 0.264428 | 0 | 1 | 4 FALSE | FZD1      |
| 19511 | 3.781751 | 0 | 0.264428 | 0 | 1 | 4 FALSE | GRAMD1A   |
| 19530 | 3.781751 | 0 | 0.264428 | 0 | 1 | 4 FALSE | HNRNPD    |
| 19537 | 3.781751 | 0 | 0.264428 | 0 | 1 | 4 FALSE | HPCAL1    |
| 19544 | 3.781751 | 0 | 0.264428 | 0 | 1 | 4 FALSE | ICE1      |
| 19557 | 3.781751 | 0 | 0.264428 | 0 | 1 | 4 FALSE | ISCU      |
| 19573 | 3.781751 | 0 | 0.264428 | 0 | 1 | 4 FALSE | KIAA1244  |
| 19598 | 3.781751 | 0 | 0.264428 | 0 | 1 | 4 FALSE | LRRC36    |
| 19608 | 3.781751 | 0 | 0.264428 | 0 | 1 | 4 FALSE | MALAT1    |
| 19641 | 3.781751 | 0 | 0.264428 | 0 | 1 | 4 FALSE | MYH14     |
| 19657 | 3.781751 | 0 | 0.264428 | 0 | 1 | 4 FALSE | NOVA1     |
| 19661 | 3.781751 | 0 | 0.264428 | 0 | 1 | 4 FALSE | NSFL1C    |
| 19671 | 3.781751 | 0 | 0.264428 | 0 | 1 | 4 FALSE | OR8U1     |
| 19682 | 3.781751 | 0 | 0.264428 | 0 | 1 | 4 FALSE | PAX8      |
| 19688 | 3.781751 | 0 | 0.264428 | 0 | 1 | 4 FALSE | PDGFA     |
| 19697 | 3.781751 | 0 | 0.264428 | 0 | 1 | 4 FALSE | PGM1      |
| 19703 | 3.781751 | 0 | 0.264428 | 0 | 1 | 4 FALSE | PHKB      |
| 19710 | 3.781751 | 0 | 0.264428 | 0 | 1 | 4 FALSE | PLA2G4A   |
| 19716 | 3.781751 | 0 | 0.264428 | 0 | 1 | 4 FALSE | PLS3      |
| 19718 | 3.781751 | 0 | 0.264428 | 0 | 1 | 4 FALSE | PLSCR4    |
| 19722 | 3.781751 | 0 | 0.264428 | 0 | 1 | 4 FALSE | POMT2     |
| 19725 | 3.781751 | 0 | 0.264428 | 0 | 1 | 4 FALSE | PPA1      |
| 19755 | 3.781751 | 0 | 0.264428 | 0 | 1 | 4 FALSE | RBM4      |
| 19757 | 3.781751 | 0 | 0.264428 | 0 | 1 | 4 FALSE | RCE1      |
| 19766 | 3.781751 | 0 | 0.264428 | 0 | 1 | 4 FALSE | RHEB      |
| 19775 | 3.781751 | 0 | 0.264428 | 0 | 1 | 4 FALSE | RPL10A    |
| 19782 | 3.781751 | 0 | 0.264428 | 0 | 1 | 4 FALSE | SART3     |
| 19787 | 3.781751 | 0 | 0.264428 | 0 | 1 | 4 FALSE | SEMA7A    |
| 19814 | 3.781751 | 0 | 0.264428 | 0 | 1 | 4 FALSE | SLC5A5    |
| 19849 | 3.781751 | 0 | 0.264428 | 0 | 1 | 4 FALSE | TBC1D16   |
| 19866 | 3.781751 | 0 | 0.264428 | 0 | 1 | 4 FALSE | TMEM216   |
| 19890 | 3.781751 | 0 | 0.264428 | 0 | 1 | 4 FALSE | U2SURP    |
| 19898 | 3.781751 | 0 | 0.264428 | 0 | 1 | 4 FALSE | USP33     |
| 19913 | 3.781751 | 0 | 0.264428 | 0 | 1 | 4 FALSE | ZBTB40    |
| 19927 | 3.781751 | 0 | 0.264428 | 0 | 1 | 4 FALSE | ZNF208    |
| 19944 | 3.781751 | 0 | 0.264428 | 0 | 1 | 4 FALSE | ZNF676    |
| 19953 | 3.781751 | 0 | 0.264428 | 0 | 1 | 4 FALSE | ZSCAN29   |
| 19965 | 3.388756 | 0 | 0.295094 | 0 | 1 | 4 FALSE | ABHD14B   |
| 19968 | 3.388756 | 0 | 0.295094 | 0 | 1 | 4 FALSE | ABHD5     |
| 19970 | 3.388756 | 0 | 0.295094 | 0 | 1 | 4 FALSE | ABR       |
| 19974 | 3.388756 | 0 | 0.295094 | 0 | 1 | 4 FALSE | ACBD5     |
| 19977 | 3.388756 | 0 | 0.295094 | 0 | 1 | 4 FALSE | ACP1      |

|       |          |   |          |   |   |         |          |
|-------|----------|---|----------|---|---|---------|----------|
| 19982 | 3.388756 | 0 | 0.295094 | 0 | 1 | 4 FALSE | ADARB1   |
| 19988 | 3.388756 | 0 | 0.295094 | 0 | 1 | 4 FALSE | ADRM1    |
| 19990 | 3.388756 | 0 | 0.295094 | 0 | 1 | 4 FALSE | ADSS     |
| 19999 | 3.388756 | 0 | 0.295094 | 0 | 1 | 4 FALSE | AGPAT5   |
| 20006 | 3.388756 | 0 | 0.295094 | 0 | 1 | 4 FALSE | ALCAM    |
| 20009 | 3.388756 | 0 | 0.295094 | 0 | 1 | 4 FALSE | ALG1     |
| 20011 | 3.388756 | 0 | 0.295094 | 0 | 1 | 4 FALSE | ALG2     |
| 20013 | 3.388756 | 0 | 0.295094 | 0 | 1 | 4 FALSE | ALOX5    |
| 20015 | 3.388756 | 0 | 0.295094 | 0 | 1 | 4 FALSE | AMBRA1   |
| 20019 | 3.388756 | 0 | 0.295094 | 0 | 1 | 4 FALSE | ANAPC16  |
| 20021 | 3.388756 | 0 | 0.295094 | 0 | 1 | 4 FALSE | ANAPC5   |
| 20023 | 3.388756 | 0 | 0.295094 | 0 | 1 | 4 FALSE | ANAPC7   |
| 20025 | 3.388756 | 0 | 0.295094 | 0 | 1 | 4 FALSE | ANGEL2   |
| 20027 | 3.388756 | 0 | 0.295094 | 0 | 1 | 4 FALSE | ANKIB1   |
| 20034 | 3.388756 | 0 | 0.295094 | 0 | 1 | 4 FALSE | AP1B1    |
| 20038 | 3.388756 | 0 | 0.295094 | 0 | 1 | 4 FALSE | AP2M1    |
| 20043 | 3.388756 | 0 | 0.295094 | 0 | 1 | 4 FALSE | ARC      |
| 20046 | 3.388756 | 0 | 0.295094 | 0 | 1 | 4 FALSE | ARFGEF1  |
| 20052 | 3.388756 | 0 | 0.295094 | 0 | 1 | 4 FALSE | ARHGAP19 |
| 20056 | 3.388756 | 0 | 0.295094 | 0 | 1 | 4 FALSE | ARHGAP35 |
| 20059 | 3.388756 | 0 | 0.295094 | 0 | 1 | 4 FALSE | ARHGEF12 |
| 20061 | 3.388756 | 0 | 0.295094 | 0 | 1 | 4 FALSE | ARHGEF18 |
| 20063 | 3.388756 | 0 | 0.295094 | 0 | 1 | 4 FALSE | ARHGEF26 |
| 20067 | 3.388756 | 0 | 0.295094 | 0 | 1 | 4 FALSE | ARIH2    |
| 20077 | 3.388756 | 0 | 0.295094 | 0 | 1 | 4 FALSE | ARPC1A   |
| 20081 | 3.388756 | 0 | 0.295094 | 0 | 1 | 4 FALSE | ARPIN    |
| 20087 | 3.388756 | 0 | 0.295094 | 0 | 1 | 4 FALSE | ASB7     |
| 20093 | 3.388756 | 0 | 0.295094 | 0 | 1 | 4 FALSE | ASNS     |
| 20097 | 3.388756 | 0 | 0.295094 | 0 | 1 | 4 FALSE | ATAD2B   |
| 20099 | 3.388756 | 0 | 0.295094 | 0 | 1 | 4 FALSE | ATF2     |
| 20103 | 3.388756 | 0 | 0.295094 | 0 | 1 | 4 FALSE | ATG16L1  |
| 20105 | 3.388756 | 0 | 0.295094 | 0 | 1 | 4 FALSE | ATG2B    |
| 20107 | 3.388756 | 0 | 0.295094 | 0 | 1 | 4 FALSE | ATG5     |
| 20113 | 3.388756 | 0 | 0.295094 | 0 | 1 | 4 FALSE | ATMIN    |
| 20122 | 3.388756 | 0 | 0.295094 | 0 | 1 | 4 FALSE | ATP2C1   |
| 20125 | 3.388756 | 0 | 0.295094 | 0 | 1 | 4 FALSE | ATP6V1B2 |
| 20127 | 3.388756 | 0 | 0.295094 | 0 | 1 | 4 FALSE | ATP6V1G1 |
| 20129 | 3.388756 | 0 | 0.295094 | 0 | 1 | 4 FALSE | ATPAF1   |
| 20135 | 3.388756 | 0 | 0.295094 | 0 | 1 | 4 FALSE | ATXN7L1  |
| 20138 | 3.388756 | 0 | 0.295094 | 0 | 1 | 4 FALSE | AUH      |
| 20142 | 3.388756 | 0 | 0.295094 | 0 | 1 | 4 FALSE | B3GNT5   |
| 20144 | 3.388756 | 0 | 0.295094 | 0 | 1 | 4 FALSE | B4GALT1  |
| 20146 | 3.388756 | 0 | 0.295094 | 0 | 1 | 4 FALSE | B4GALT3  |
| 20148 | 3.388756 | 0 | 0.295094 | 0 | 1 | 4 FALSE | B4GALT5  |
| 20152 | 3.388756 | 0 | 0.295094 | 0 | 1 | 4 FALSE | BAMBI    |
| 20156 | 3.388756 | 0 | 0.295094 | 0 | 1 | 4 FALSE | BCAS3    |
| 20158 | 3.388756 | 0 | 0.295094 | 0 | 1 | 4 FALSE | BCAS4    |



|       |          |   |          |   |   |         |                    |
|-------|----------|---|----------|---|---|---------|--------------------|
| 20162 | 3.388756 | 0 | 0.295094 | 0 | 1 | 4 FALSE | BCL7A              |
| 20165 | 3.388756 | 0 | 0.295094 | 0 | 1 | 4 FALSE | BDKRB2             |
| 20167 | 3.388756 | 0 | 0.295094 | 0 | 1 | 4 FALSE | BEND3              |
| 20169 | 3.388756 | 0 | 0.295094 | 0 | 1 | 4 FALSE | BFAR               |
| 20171 | 3.388756 | 0 | 0.295094 | 0 | 1 | 4 FALSE | BID                |
| 20178 | 3.388756 | 0 | 0.295094 | 0 | 1 | 4 FALSE | BMPR2              |
| 20180 | 3.388756 | 0 | 0.295094 | 0 | 1 | 4 FALSE | BNC2               |
| 20183 | 3.388756 | 0 | 0.295094 | 0 | 1 | 4 FALSE | BRD1               |
| 20185 | 3.388756 | 0 | 0.295094 | 0 | 1 | 4 FALSE | BRD9               |
| 20188 | 3.388756 | 0 | 0.295094 | 0 | 1 | 4 FALSE | BROX               |
| 20192 | 3.388756 | 0 | 0.295094 | 0 | 1 | 4 FALSE | BTBD11             |
| 20200 | 3.388756 | 0 | 0.295094 | 0 | 1 | 4 FALSE | C10orf2            |
| 20203 | 3.388756 | 0 | 0.295094 | 0 | 1 | 4 FALSE | C11orf57           |
| 20206 | 3.388756 | 0 | 0.295094 | 0 | 1 | 4 FALSE | C12orf76           |
| 20208 | 3.388756 | 0 | 0.295094 | 0 | 1 | 4 FALSE | C14orf166          |
| 20210 | 3.388756 | 0 | 0.295094 | 0 | 1 | 4 FALSE | C15orf38- <i>A</i> |
| 20213 | 3.388756 | 0 | 0.295094 | 0 | 1 | 4 FALSE | C16orf70           |
| 20217 | 3.388756 | 0 | 0.295094 | 0 | 1 | 4 FALSE | C18orf25           |
| 20219 | 3.388756 | 0 | 0.295094 | 0 | 1 | 4 FALSE | C18orf54           |
| 20223 | 3.388756 | 0 | 0.295094 | 0 | 1 | 4 FALSE | C19orf52           |
| 20229 | 3.388756 | 0 | 0.295094 | 0 | 1 | 4 FALSE | C2CD2              |
| 20231 | 3.388756 | 0 | 0.295094 | 0 | 1 | 4 FALSE | C2orf42            |
| 20233 | 3.388756 | 0 | 0.295094 | 0 | 1 | 4 FALSE | C2orf69            |
| 20235 | 3.388756 | 0 | 0.295094 | 0 | 1 | 4 FALSE | C4orf32            |
| 20237 | 3.388756 | 0 | 0.295094 | 0 | 1 | 4 FALSE | C4orf33            |
| 20241 | 3.388756 | 0 | 0.295094 | 0 | 1 | 4 FALSE | C5orf28            |
| 20243 | 3.388756 | 0 | 0.295094 | 0 | 1 | 4 FALSE | C5orf30            |
| 20245 | 3.388756 | 0 | 0.295094 | 0 | 1 | 4 FALSE | C5orf51            |
| 20247 | 3.388756 | 0 | 0.295094 | 0 | 1 | 4 FALSE | C5orf56            |
| 20249 | 3.388756 | 0 | 0.295094 | 0 | 1 | 4 FALSE | C6orf132           |
| 20251 | 3.388756 | 0 | 0.295094 | 0 | 1 | 4 FALSE | C6orf136           |
| 20254 | 3.388756 | 0 | 0.295094 | 0 | 1 | 4 FALSE | C6orf89            |
| 20258 | 3.388756 | 0 | 0.295094 | 0 | 1 | 4 FALSE | C9orf69            |
| 20262 | 3.388756 | 0 | 0.295094 | 0 | 1 | 4 FALSE | CACNA2D1           |
| 20265 | 3.388756 | 0 | 0.295094 | 0 | 1 | 4 FALSE | CADM4              |
| 20267 | 3.388756 | 0 | 0.295094 | 0 | 1 | 4 FALSE | CALCRL             |
| 20276 | 3.388756 | 0 | 0.295094 | 0 | 1 | 4 FALSE | CAPRIN2            |
| 20280 | 3.388756 | 0 | 0.295094 | 0 | 1 | 4 FALSE | CASP10             |
| 20284 | 3.388756 | 0 | 0.295094 | 0 | 1 | 4 FALSE | CASZ1              |
| 20291 | 3.388756 | 0 | 0.295094 | 0 | 1 | 4 FALSE | CBY1               |
| 20293 | 3.388756 | 0 | 0.295094 | 0 | 1 | 4 FALSE | CC2D1A             |
| 20295 | 3.388756 | 0 | 0.295094 | 0 | 1 | 4 FALSE | CCAR2              |
| 20297 | 3.388756 | 0 | 0.295094 | 0 | 1 | 4 FALSE | CCDC12             |
| 20299 | 3.388756 | 0 | 0.295094 | 0 | 1 | 4 FALSE | CCDC126            |
| 20303 | 3.388756 | 0 | 0.295094 | 0 | 1 | 4 FALSE | CCDC47             |
| 20306 | 3.388756 | 0 | 0.295094 | 0 | 1 | 4 FALSE | CCDC82             |
| 20308 | 3.388756 | 0 | 0.295094 | 0 | 1 | 4 FALSE | CCM2               |

|       |          |   |          |   |   |         |          |
|-------|----------|---|----------|---|---|---------|----------|
| 20316 | 3.388756 | 0 | 0.295094 | 0 | 1 | 4 FALSE | CCNL1    |
| 20320 | 3.388756 | 0 | 0.295094 | 0 | 1 | 4 FALSE | CCSER2   |
| 20323 | 3.388756 | 0 | 0.295094 | 0 | 1 | 4 FALSE | CCT8     |
| 20325 | 3.388756 | 0 | 0.295094 | 0 | 1 | 4 FALSE | CD164    |
| 20328 | 3.388756 | 0 | 0.295094 | 0 | 1 | 4 FALSE | CD22     |
| 20333 | 3.388756 | 0 | 0.295094 | 0 | 1 | 4 FALSE | CDC42BPB |
| 20335 | 3.388756 | 0 | 0.295094 | 0 | 1 | 4 FALSE | CDK13    |
| 20337 | 3.388756 | 0 | 0.295094 | 0 | 1 | 4 FALSE | CDK14    |
| 20339 | 3.388756 | 0 | 0.295094 | 0 | 1 | 4 FALSE | CDKAL1   |
| 20344 | 3.388756 | 0 | 0.295094 | 0 | 1 | 4 FALSE | CDS1     |
| 20347 | 3.388756 | 0 | 0.295094 | 0 | 1 | 4 FALSE | CELSR1   |
| 20349 | 3.388756 | 0 | 0.295094 | 0 | 1 | 4 FALSE | CENPF    |
| 20351 | 3.388756 | 0 | 0.295094 | 0 | 1 | 4 FALSE | CENPN    |
| 20354 | 3.388756 | 0 | 0.295094 | 0 | 1 | 4 FALSE | CEP170   |
| 20357 | 3.388756 | 0 | 0.295094 | 0 | 1 | 4 FALSE | CEP55    |
| 20359 | 3.388756 | 0 | 0.295094 | 0 | 1 | 4 FALSE | CEP76    |
| 20361 | 3.388756 | 0 | 0.295094 | 0 | 1 | 4 FALSE | CERCAM   |
| 20369 | 3.388756 | 0 | 0.295094 | 0 | 1 | 4 FALSE | CHD2     |
| 20374 | 3.388756 | 0 | 0.295094 | 0 | 1 | 4 FALSE | CHEK2    |
| 20377 | 3.388756 | 0 | 0.295094 | 0 | 1 | 4 FALSE | CHIC1    |
| 20379 | 3.388756 | 0 | 0.295094 | 0 | 1 | 4 FALSE | CHM      |
| 20382 | 3.388756 | 0 | 0.295094 | 0 | 1 | 4 FALSE | CHURC1   |
| 20384 | 3.388756 | 0 | 0.295094 | 0 | 1 | 4 FALSE | CISD3    |
| 20386 | 3.388756 | 0 | 0.295094 | 0 | 1 | 4 FALSE | CIT      |
| 20396 | 3.388756 | 0 | 0.295094 | 0 | 1 | 4 FALSE | CLOCK    |
| 20399 | 3.388756 | 0 | 0.295094 | 0 | 1 | 4 FALSE | CLVS2    |
| 20403 | 3.388756 | 0 | 0.295094 | 0 | 1 | 4 FALSE | CNIH3    |
| 20405 | 3.388756 | 0 | 0.295094 | 0 | 1 | 4 FALSE | CNIH4    |
| 20407 | 3.388756 | 0 | 0.295094 | 0 | 1 | 4 FALSE | CNOT1    |
| 20411 | 3.388756 | 0 | 0.295094 | 0 | 1 | 4 FALSE | CNOT7    |
| 20413 | 3.388756 | 0 | 0.295094 | 0 | 1 | 4 FALSE | COBLL1   |
| 20415 | 3.388756 | 0 | 0.295094 | 0 | 1 | 4 FALSE | COG5     |
| 20419 | 3.388756 | 0 | 0.295094 | 0 | 1 | 4 FALSE | COL6A2   |
| 20421 | 3.388756 | 0 | 0.295094 | 0 | 1 | 4 FALSE | COLGALT1 |
| 20423 | 3.388756 | 0 | 0.295094 | 0 | 1 | 4 FALSE | COPS4    |
| 20425 | 3.388756 | 0 | 0.295094 | 0 | 1 | 4 FALSE | COQ10B   |
| 20428 | 3.388756 | 0 | 0.295094 | 0 | 1 | 4 FALSE | COX6A1   |
| 20430 | 3.388756 | 0 | 0.295094 | 0 | 1 | 4 FALSE | CPD      |
| 20434 | 3.388756 | 0 | 0.295094 | 0 | 1 | 4 FALSE | CPOX     |
| 20436 | 3.388756 | 0 | 0.295094 | 0 | 1 | 4 FALSE | CRCP     |
| 20440 | 3.388756 | 0 | 0.295094 | 0 | 1 | 4 FALSE | CREBBP   |
| 20442 | 3.388756 | 0 | 0.295094 | 0 | 1 | 4 FALSE | CREBL2   |
| 20448 | 3.388756 | 0 | 0.295094 | 0 | 1 | 4 FALSE | CSF2RB   |
| 20450 | 3.388756 | 0 | 0.295094 | 0 | 1 | 4 FALSE | CSMD1    |
| 20458 | 3.388756 | 0 | 0.295094 | 0 | 1 | 4 FALSE | CSTF2T   |
| 20460 | 3.388756 | 0 | 0.295094 | 0 | 1 | 4 FALSE | CTCF     |
| 20463 | 3.388756 | 0 | 0.295094 | 0 | 1 | 4 FALSE | CUL4A    |

|       |          |   |          |   |   |         |          |
|-------|----------|---|----------|---|---|---------|----------|
| 20468 | 3.388756 | 0 | 0.295094 | 0 | 1 | 4 FALSE | CXorf57  |
| 20470 | 3.388756 | 0 | 0.295094 | 0 | 1 | 4 FALSE | CXXC5    |
| 20472 | 3.388756 | 0 | 0.295094 | 0 | 1 | 4 FALSE | CYB561D1 |
| 20474 | 3.388756 | 0 | 0.295094 | 0 | 1 | 4 FALSE | CYLD     |
| 20476 | 3.388756 | 0 | 0.295094 | 0 | 1 | 4 FALSE | CYP2U1   |
| 20480 | 3.388756 | 0 | 0.295094 | 0 | 1 | 4 FALSE | CYSTM1   |
| 20482 | 3.388756 | 0 | 0.295094 | 0 | 1 | 4 FALSE | DAAM1    |
| 20488 | 3.388756 | 0 | 0.295094 | 0 | 1 | 4 FALSE | DBN1     |
| 20492 | 3.388756 | 0 | 0.295094 | 0 | 1 | 4 FALSE | DCAKD    |
| 20495 | 3.388756 | 0 | 0.295094 | 0 | 1 | 4 FALSE | DCC      |
| 20501 | 3.388756 | 0 | 0.295094 | 0 | 1 | 4 FALSE | DDB1     |
| 20504 | 3.388756 | 0 | 0.295094 | 0 | 1 | 4 FALSE | DDR GK1  |
| 20509 | 3.388756 | 0 | 0.295094 | 0 | 1 | 4 FALSE | DDX28    |
| 20514 | 3.388756 | 0 | 0.295094 | 0 | 1 | 4 FALSE | DDX3Y    |
| 20516 | 3.388756 | 0 | 0.295094 | 0 | 1 | 4 FALSE | DDX5     |
| 20519 | 3.388756 | 0 | 0.295094 | 0 | 1 | 4 FALSE | DEDD2    |
| 20524 | 3.388756 | 0 | 0.295094 | 0 | 1 | 4 FALSE | DENND1A  |
| 20526 | 3.388756 | 0 | 0.295094 | 0 | 1 | 4 FALSE | DENND6A  |
| 20528 | 3.388756 | 0 | 0.295094 | 0 | 1 | 4 FALSE | DEPDC1   |
| 20530 | 3.388756 | 0 | 0.295094 | 0 | 1 | 4 FALSE | DEPDC1B  |
| 20532 | 3.388756 | 0 | 0.295094 | 0 | 1 | 4 FALSE | DERL1    |
| 20534 | 3.388756 | 0 | 0.295094 | 0 | 1 | 4 FALSE | DESI2    |
| 20538 | 3.388756 | 0 | 0.295094 | 0 | 1 | 4 FALSE | DHRS3    |
| 20544 | 3.388756 | 0 | 0.295094 | 0 | 1 | 4 FALSE | DIP2A    |
| 20546 | 3.388756 | 0 | 0.295094 | 0 | 1 | 4 FALSE | DIRC2    |
| 20548 | 3.388756 | 0 | 0.295094 | 0 | 1 | 4 FALSE | DIS3L2   |
| 20553 | 3.388756 | 0 | 0.295094 | 0 | 1 | 4 FALSE | DKK1     |
| 20556 | 3.388756 | 0 | 0.295094 | 0 | 1 | 4 FALSE | DMXL2    |
| 20559 | 3.388756 | 0 | 0.295094 | 0 | 1 | 4 FALSE | DNAJA2   |
| 20567 | 3.388756 | 0 | 0.295094 | 0 | 1 | 4 FALSE | DNPEP    |
| 20569 | 3.388756 | 0 | 0.295094 | 0 | 1 | 4 FALSE | DPYSL2   |
| 20571 | 3.388756 | 0 | 0.295094 | 0 | 1 | 4 FALSE | DPYSL5   |
| 20575 | 3.388756 | 0 | 0.295094 | 0 | 1 | 4 FALSE | DROSHA   |
| 20577 | 3.388756 | 0 | 0.295094 | 0 | 1 | 4 FALSE | DSCR3    |
| 20579 | 3.388756 | 0 | 0.295094 | 0 | 1 | 4 FALSE | DSE      |
| 20582 | 3.388756 | 0 | 0.295094 | 0 | 1 | 4 FALSE | DSN1     |
| 20587 | 3.388756 | 0 | 0.295094 | 0 | 1 | 4 FALSE | DUSP5    |
| 20589 | 3.388756 | 0 | 0.295094 | 0 | 1 | 4 FALSE | DUSP7    |
| 20591 | 3.388756 | 0 | 0.295094 | 0 | 1 | 4 FALSE | DUT      |
| 20595 | 3.388756 | 0 | 0.295094 | 0 | 1 | 4 FALSE | DYNLL1   |
| 20597 | 3.388756 | 0 | 0.295094 | 0 | 1 | 4 FALSE | DYNLRB1  |
| 20601 | 3.388756 | 0 | 0.295094 | 0 | 1 | 4 FALSE | E2F2     |
| 20607 | 3.388756 | 0 | 0.295094 | 0 | 1 | 4 FALSE | ECD      |
| 20609 | 3.388756 | 0 | 0.295094 | 0 | 1 | 4 FALSE | ECE2     |
| 20613 | 3.388756 | 0 | 0.295094 | 0 | 1 | 4 FALSE | EFR3A    |
| 20615 | 3.388756 | 0 | 0.295094 | 0 | 1 | 4 FALSE | EHD1     |
| 20617 | 3.388756 | 0 | 0.295094 | 0 | 1 | 4 FALSE | EID1     |

|       |          |   |          |   |   |         |          |
|-------|----------|---|----------|---|---|---------|----------|
| 20620 | 3.388756 | 0 | 0.295094 | 0 | 1 | 4 FALSE | EIF1AX   |
| 20631 | 3.388756 | 0 | 0.295094 | 0 | 1 | 4 FALSE | ELF1     |
| 20633 | 3.388756 | 0 | 0.295094 | 0 | 1 | 4 FALSE | ELF2     |
| 20644 | 3.388756 | 0 | 0.295094 | 0 | 1 | 4 FALSE | ENC1     |
| 20647 | 3.388756 | 0 | 0.295094 | 0 | 1 | 4 FALSE | ENPP4    |
| 20649 | 3.388756 | 0 | 0.295094 | 0 | 1 | 4 FALSE | ENPP5    |
| 20653 | 3.388756 | 0 | 0.295094 | 0 | 1 | 4 FALSE | EOGT     |
| 20656 | 3.388756 | 0 | 0.295094 | 0 | 1 | 4 FALSE | EPDR1    |
| 20659 | 3.388756 | 0 | 0.295094 | 0 | 1 | 4 FALSE | EPHA4    |
| 20661 | 3.388756 | 0 | 0.295094 | 0 | 1 | 4 FALSE | EPHB4    |
| 20663 | 3.388756 | 0 | 0.295094 | 0 | 1 | 4 FALSE | EPM2AIP1 |
| 20665 | 3.388756 | 0 | 0.295094 | 0 | 1 | 4 FALSE | EPN2     |
| 20667 | 3.388756 | 0 | 0.295094 | 0 | 1 | 4 FALSE | EPS15    |
| 20669 | 3.388756 | 0 | 0.295094 | 0 | 1 | 4 FALSE | ERBB2    |
| 20672 | 3.388756 | 0 | 0.295094 | 0 | 1 | 4 FALSE | ERCC4    |
| 20674 | 3.388756 | 0 | 0.295094 | 0 | 1 | 4 FALSE | EREG     |
| 20676 | 3.388756 | 0 | 0.295094 | 0 | 1 | 4 FALSE | ERLIN1   |
| 20681 | 3.388756 | 0 | 0.295094 | 0 | 1 | 4 FALSE | ESRP2    |
| 20685 | 3.388756 | 0 | 0.295094 | 0 | 1 | 4 FALSE | ETV3     |
| 20691 | 3.388756 | 0 | 0.295094 | 0 | 1 | 4 FALSE | EXOC7    |
| 20693 | 3.388756 | 0 | 0.295094 | 0 | 1 | 4 FALSE | EXOSC6   |
| 20695 | 3.388756 | 0 | 0.295094 | 0 | 1 | 4 FALSE | EXOSC7   |
| 20699 | 3.388756 | 0 | 0.295094 | 0 | 1 | 4 FALSE | F3       |
| 20701 | 3.388756 | 0 | 0.295094 | 0 | 1 | 4 FALSE | FA2H     |
| 20704 | 3.388756 | 0 | 0.295094 | 0 | 1 | 4 FALSE | FAM114A1 |
| 20706 | 3.388756 | 0 | 0.295094 | 0 | 1 | 4 FALSE | FAM127C  |
| 20709 | 3.388756 | 0 | 0.295094 | 0 | 1 | 4 FALSE | FAM13C   |
| 20712 | 3.388756 | 0 | 0.295094 | 0 | 1 | 4 FALSE | FAM160B1 |
| 20714 | 3.388756 | 0 | 0.295094 | 0 | 1 | 4 FALSE | FAM162A  |
| 20716 | 3.388756 | 0 | 0.295094 | 0 | 1 | 4 FALSE | FAM168A  |
| 20718 | 3.388756 | 0 | 0.295094 | 0 | 1 | 4 FALSE | FAM178A  |
| 20720 | 3.388756 | 0 | 0.295094 | 0 | 1 | 4 FALSE | FAM179B  |
| 20722 | 3.388756 | 0 | 0.295094 | 0 | 1 | 4 FALSE | FAM198B  |
| 20724 | 3.388756 | 0 | 0.295094 | 0 | 1 | 4 FALSE | FAM208B  |
| 20729 | 3.388756 | 0 | 0.295094 | 0 | 1 | 4 FALSE | FAM63B   |
| 20732 | 3.388756 | 0 | 0.295094 | 0 | 1 | 4 FALSE | FAM83D   |
| 20734 | 3.388756 | 0 | 0.295094 | 0 | 1 | 4 FALSE | FAM86A   |
| 20737 | 3.388756 | 0 | 0.295094 | 0 | 1 | 4 FALSE | FANCC    |
| 20742 | 3.388756 | 0 | 0.295094 | 0 | 1 | 4 FALSE | FASTKD5  |
| 20744 | 3.388756 | 0 | 0.295094 | 0 | 1 | 4 FALSE | FBL      |
| 20746 | 3.388756 | 0 | 0.295094 | 0 | 1 | 4 FALSE | FBLIM1   |
| 20750 | 3.388756 | 0 | 0.295094 | 0 | 1 | 4 FALSE | FBRSL1   |
| 20752 | 3.388756 | 0 | 0.295094 | 0 | 1 | 4 FALSE | FBXO10   |
| 20756 | 3.388756 | 0 | 0.295094 | 0 | 1 | 4 FALSE | FBXO32   |
| 20758 | 3.388756 | 0 | 0.295094 | 0 | 1 | 4 FALSE | FBXO48   |
| 20760 | 3.388756 | 0 | 0.295094 | 0 | 1 | 4 FALSE | FBXO8    |
| 20764 | 3.388756 | 0 | 0.295094 | 0 | 1 | 4 FALSE | FCRLA    |

|       |          |   |          |   |   |         |          |
|-------|----------|---|----------|---|---|---------|----------|
| 20766 | 3.388756 | 0 | 0.295094 | 0 | 1 | 4 FALSE | FEM1A    |
| 20770 | 3.388756 | 0 | 0.295094 | 0 | 1 | 4 FALSE | FEM1C    |
| 20773 | 3.388756 | 0 | 0.295094 | 0 | 1 | 4 FALSE | FGF7     |
| 20776 | 3.388756 | 0 | 0.295094 | 0 | 1 | 4 FALSE | FGFR2    |
| 20782 | 3.388756 | 0 | 0.295094 | 0 | 1 | 4 FALSE | FKBP15   |
| 20784 | 3.388756 | 0 | 0.295094 | 0 | 1 | 4 FALSE | FKBP4    |
| 20788 | 3.388756 | 0 | 0.295094 | 0 | 1 | 4 FALSE | FLRT2    |
| 20795 | 3.388756 | 0 | 0.295094 | 0 | 1 | 4 FALSE | FOXF2    |
| 20797 | 3.388756 | 0 | 0.295094 | 0 | 1 | 4 FALSE | FOXJ3    |
| 20805 | 3.388756 | 0 | 0.295094 | 0 | 1 | 4 FALSE | FOXQ1    |
| 20809 | 3.388756 | 0 | 0.295094 | 0 | 1 | 4 FALSE | FUT4     |
| 20813 | 3.388756 | 0 | 0.295094 | 0 | 1 | 4 FALSE | FZD5     |
| 20816 | 3.388756 | 0 | 0.295094 | 0 | 1 | 4 FALSE | G0S2     |
| 20818 | 3.388756 | 0 | 0.295094 | 0 | 1 | 4 FALSE | G2E3     |
| 20821 | 3.388756 | 0 | 0.295094 | 0 | 1 | 4 FALSE | G6PC     |
| 20823 | 3.388756 | 0 | 0.295094 | 0 | 1 | 4 FALSE | GAA      |
| 20826 | 3.388756 | 0 | 0.295094 | 0 | 1 | 4 FALSE | GAK      |
| 20833 | 3.388756 | 0 | 0.295094 | 0 | 1 | 4 FALSE | GCNT2    |
| 20835 | 3.388756 | 0 | 0.295094 | 0 | 1 | 4 FALSE | GCSH     |
| 20838 | 3.388756 | 0 | 0.295094 | 0 | 1 | 4 FALSE | GDNF     |
| 20840 | 3.388756 | 0 | 0.295094 | 0 | 1 | 4 FALSE | GEMIN7   |
| 20842 | 3.388756 | 0 | 0.295094 | 0 | 1 | 4 FALSE | GEMIN8   |
| 20845 | 3.388756 | 0 | 0.295094 | 0 | 1 | 4 FALSE | GID4     |
| 20849 | 3.388756 | 0 | 0.295094 | 0 | 1 | 4 FALSE | GIT2     |
| 20851 | 3.388756 | 0 | 0.295094 | 0 | 1 | 4 FALSE | GLCE     |
| 20853 | 3.388756 | 0 | 0.295094 | 0 | 1 | 4 FALSE | GLE1     |
| 20855 | 3.388756 | 0 | 0.295094 | 0 | 1 | 4 FALSE | GLIS2    |
| 20861 | 3.388756 | 0 | 0.295094 | 0 | 1 | 4 FALSE | GNAI3    |
| 20867 | 3.388756 | 0 | 0.295094 | 0 | 1 | 4 FALSE | GPBP1    |
| 20872 | 3.388756 | 0 | 0.295094 | 0 | 1 | 4 FALSE | GPR125   |
| 20876 | 3.388756 | 0 | 0.295094 | 0 | 1 | 4 FALSE | GPR176   |
| 20880 | 3.388756 | 0 | 0.295094 | 0 | 1 | 4 FALSE | GREB1    |
| 20883 | 3.388756 | 0 | 0.295094 | 0 | 1 | 4 FALSE | GRHL2    |
| 20886 | 3.388756 | 0 | 0.295094 | 0 | 1 | 4 FALSE | GRK6     |
| 20893 | 3.388756 | 0 | 0.295094 | 0 | 1 | 4 FALSE | GSPT1    |
| 20896 | 3.388756 | 0 | 0.295094 | 0 | 1 | 4 FALSE | GTF2H1   |
| 20898 | 3.388756 | 0 | 0.295094 | 0 | 1 | 4 FALSE | H3F3B    |
| 20900 | 3.388756 | 0 | 0.295094 | 0 | 1 | 4 FALSE | HADHB    |
| 20902 | 3.388756 | 0 | 0.295094 | 0 | 1 | 4 FALSE | HAT1     |
| 20905 | 3.388756 | 0 | 0.295094 | 0 | 1 | 4 FALSE | HBS1L    |
| 20909 | 3.388756 | 0 | 0.295094 | 0 | 1 | 4 FALSE | HCFC2    |
| 20911 | 3.388756 | 0 | 0.295094 | 0 | 1 | 4 FALSE | HDAC4    |
| 20913 | 3.388756 | 0 | 0.295094 | 0 | 1 | 4 FALSE | HDAC5    |
| 20928 | 3.388756 | 0 | 0.295094 | 0 | 1 | 4 FALSE | HIST2H4A |
| 20930 | 3.388756 | 0 | 0.295094 | 0 | 1 | 4 FALSE | HIST2H4B |
| 20933 | 3.388756 | 0 | 0.295094 | 0 | 1 | 4 FALSE | HMBOX1   |
| 20938 | 3.388756 | 0 | 0.295094 | 0 | 1 | 4 FALSE | HNRNPLL  |

|       |          |   |          |   |   |         |          |
|-------|----------|---|----------|---|---|---------|----------|
| 20942 | 3.388756 | 0 | 0.295094 | 0 | 1 | 4 FALSE | HOMER1   |
| 20944 | 3.388756 | 0 | 0.295094 | 0 | 1 | 4 FALSE | HOXA5    |
| 20946 | 3.388756 | 0 | 0.295094 | 0 | 1 | 4 FALSE | HOXB3    |
| 20948 | 3.388756 | 0 | 0.295094 | 0 | 1 | 4 FALSE | HOXB9    |
| 20955 | 3.388756 | 0 | 0.295094 | 0 | 1 | 4 FALSE | IARS     |
| 20961 | 3.388756 | 0 | 0.295094 | 0 | 1 | 4 FALSE | IDNK     |
| 20966 | 3.388756 | 0 | 0.295094 | 0 | 1 | 4 FALSE | IGF2BP3  |
| 20969 | 3.388756 | 0 | 0.295094 | 0 | 1 | 4 FALSE | IGFBP3   |
| 20971 | 3.388756 | 0 | 0.295094 | 0 | 1 | 4 FALSE | IGSF3    |
| 20977 | 3.388756 | 0 | 0.295094 | 0 | 1 | 4 FALSE | IL1R1    |
| 20980 | 3.388756 | 0 | 0.295094 | 0 | 1 | 4 FALSE | IL2RB    |
| 20982 | 3.388756 | 0 | 0.295094 | 0 | 1 | 4 FALSE | IMPDH1   |
| 20984 | 3.388756 | 0 | 0.295094 | 0 | 1 | 4 FALSE | IMPDH1P1 |
| 20987 | 3.388756 | 0 | 0.295094 | 0 | 1 | 4 FALSE | INF2     |
| 20989 | 3.388756 | 0 | 0.295094 | 0 | 1 | 4 FALSE | INHBA    |
| 20991 | 3.388756 | 0 | 0.295094 | 0 | 1 | 4 FALSE | INHBB    |
| 20993 | 3.388756 | 0 | 0.295094 | 0 | 1 | 4 FALSE | INO80    |
| 20995 | 3.388756 | 0 | 0.295094 | 0 | 1 | 4 FALSE | INSIG1   |
| 20997 | 3.388756 | 0 | 0.295094 | 0 | 1 | 4 FALSE | INTS2    |
| 20999 | 3.388756 | 0 | 0.295094 | 0 | 1 | 4 FALSE | IP6K1    |
| 21001 | 3.388756 | 0 | 0.295094 | 0 | 1 | 4 FALSE | IP6K2    |
| 21012 | 3.388756 | 0 | 0.295094 | 0 | 1 | 4 FALSE | IRX4     |
| 21014 | 3.388756 | 0 | 0.295094 | 0 | 1 | 4 FALSE | ITGA2    |
| 21016 | 3.388756 | 0 | 0.295094 | 0 | 1 | 4 FALSE | ITGA6    |
| 21020 | 3.388756 | 0 | 0.295094 | 0 | 1 | 4 FALSE | ITM2B    |
| 21022 | 3.388756 | 0 | 0.295094 | 0 | 1 | 4 FALSE | ITPKB    |
| 21026 | 3.388756 | 0 | 0.295094 | 0 | 1 | 4 FALSE | ITPR2    |
| 21034 | 3.388756 | 0 | 0.295094 | 0 | 1 | 4 FALSE | JMY      |
| 21037 | 3.388756 | 0 | 0.295094 | 0 | 1 | 4 FALSE | JUND     |
| 21040 | 3.388756 | 0 | 0.295094 | 0 | 1 | 4 FALSE | KAT2B    |
| 21044 | 3.388756 | 0 | 0.295094 | 0 | 1 | 4 FALSE | KBTBD8   |
| 21046 | 3.388756 | 0 | 0.295094 | 0 | 1 | 4 FALSE | KCNJ2    |
| 21049 | 3.388756 | 0 | 0.295094 | 0 | 1 | 4 FALSE | KCTD10   |
| 21052 | 3.388756 | 0 | 0.295094 | 0 | 1 | 4 FALSE | KDELR2   |
| 21057 | 3.388756 | 0 | 0.295094 | 0 | 1 | 4 FALSE | KDM6A    |
| 21059 | 3.388756 | 0 | 0.295094 | 0 | 1 | 4 FALSE | KIAA0101 |
| 21061 | 3.388756 | 0 | 0.295094 | 0 | 1 | 4 FALSE | KIAA0825 |
| 21066 | 3.388756 | 0 | 0.295094 | 0 | 1 | 4 FALSE | KIAA1279 |
| 21068 | 3.388756 | 0 | 0.295094 | 0 | 1 | 4 FALSE | KIAA1468 |
| 21075 | 3.388756 | 0 | 0.295094 | 0 | 1 | 4 FALSE | KIF26A   |
| 21083 | 3.388756 | 0 | 0.295094 | 0 | 1 | 4 FALSE | KITLG    |
| 21091 | 3.388756 | 0 | 0.295094 | 0 | 1 | 4 FALSE | KLHDC2   |
| 21096 | 3.388756 | 0 | 0.295094 | 0 | 1 | 4 FALSE | KLHL3    |
| 21104 | 3.388756 | 0 | 0.295094 | 0 | 1 | 4 FALSE | LAMP1    |
| 21106 | 3.388756 | 0 | 0.295094 | 0 | 1 | 4 FALSE | LAMTOR5  |
| 21111 | 3.388756 | 0 | 0.295094 | 0 | 1 | 4 FALSE | LCLAT1   |
| 21114 | 3.388756 | 0 | 0.295094 | 0 | 1 | 4 FALSE | LDLRAP1  |

|       |          |   |          |   |   |         |           |
|-------|----------|---|----------|---|---|---------|-----------|
| 21116 | 3.388756 | 0 | 0.295094 | 0 | 1 | 4 FALSE | LEMD3     |
| 21119 | 3.388756 | 0 | 0.295094 | 0 | 1 | 4 FALSE | LIF       |
| 21123 | 3.388756 | 0 | 0.295094 | 0 | 1 | 4 FALSE | LMLN      |
| 21126 | 3.388756 | 0 | 0.295094 | 0 | 1 | 4 FALSE | LOC613266 |
| 21128 | 3.388756 | 0 | 0.295094 | 0 | 1 | 4 FALSE | LONRF1    |
| 21132 | 3.388756 | 0 | 0.295094 | 0 | 1 | 4 FALSE | LPP       |
| 21134 | 3.388756 | 0 | 0.295094 | 0 | 1 | 4 FALSE | LRBA      |
| 21136 | 3.388756 | 0 | 0.295094 | 0 | 1 | 4 FALSE | LRCH1     |
| 21138 | 3.388756 | 0 | 0.295094 | 0 | 1 | 4 FALSE | LRCH3     |
| 21140 | 3.388756 | 0 | 0.295094 | 0 | 1 | 4 FALSE | LRFN5     |
| 21144 | 3.388756 | 0 | 0.295094 | 0 | 1 | 4 FALSE | LRP8      |
| 21147 | 3.388756 | 0 | 0.295094 | 0 | 1 | 4 FALSE | LRRC8A    |
| 21149 | 3.388756 | 0 | 0.295094 | 0 | 1 | 4 FALSE | LRRC8B    |
| 21151 | 3.388756 | 0 | 0.295094 | 0 | 1 | 4 FALSE | LRRTM4    |
| 21155 | 3.388756 | 0 | 0.295094 | 0 | 1 | 4 FALSE | LTV1      |
| 21158 | 3.388756 | 0 | 0.295094 | 0 | 1 | 4 FALSE | LY75-CD30 |
| 21164 | 3.388756 | 0 | 0.295094 | 0 | 1 | 4 FALSE | MALT1     |
| 21166 | 3.388756 | 0 | 0.295094 | 0 | 1 | 4 FALSE | MAP2K3    |
| 21168 | 3.388756 | 0 | 0.295094 | 0 | 1 | 4 FALSE | MAP3K1    |
| 21170 | 3.388756 | 0 | 0.295094 | 0 | 1 | 4 FALSE | MAP3K14   |
| 21177 | 3.388756 | 0 | 0.295094 | 0 | 1 | 4 FALSE | MAP4K5    |
| 21182 | 3.388756 | 0 | 0.295094 | 0 | 1 | 4 FALSE | MAPK8     |
| 21185 | 3.388756 | 0 | 0.295094 | 0 | 1 | 4 FALSE | MARK1     |
| 21188 | 3.388756 | 0 | 0.295094 | 0 | 1 | 4 FALSE | MAT2A     |
| 21190 | 3.388756 | 0 | 0.295094 | 0 | 1 | 4 FALSE | MATN3     |
| 21195 | 3.388756 | 0 | 0.295094 | 0 | 1 | 4 FALSE | MB21D1    |
| 21197 | 3.388756 | 0 | 0.295094 | 0 | 1 | 4 FALSE | MB21D2    |
| 21205 | 3.388756 | 0 | 0.295094 | 0 | 1 | 4 FALSE | MBNL3     |
| 21209 | 3.388756 | 0 | 0.295094 | 0 | 1 | 4 FALSE | MBTPS2    |
| 21212 | 3.388756 | 0 | 0.295094 | 0 | 1 | 4 FALSE | MCM3AP-1  |
| 21214 | 3.388756 | 0 | 0.295094 | 0 | 1 | 4 FALSE | MCRIP2    |
| 21222 | 3.388756 | 0 | 0.295094 | 0 | 1 | 4 FALSE | MED12L    |
| 21225 | 3.388756 | 0 | 0.295094 | 0 | 1 | 4 FALSE | MED13L    |
| 21227 | 3.388756 | 0 | 0.295094 | 0 | 1 | 4 FALSE | MED21     |
| 21231 | 3.388756 | 0 | 0.295094 | 0 | 1 | 4 FALSE | MESDC1    |
| 21236 | 3.388756 | 0 | 0.295094 | 0 | 1 | 4 FALSE | MFHAS1    |
| 21238 | 3.388756 | 0 | 0.295094 | 0 | 1 | 4 FALSE | MFSD1     |
| 21242 | 3.388756 | 0 | 0.295094 | 0 | 1 | 4 FALSE | MFSD9     |
| 21249 | 3.388756 | 0 | 0.295094 | 0 | 1 | 4 FALSE | MICAL3    |
| 21252 | 3.388756 | 0 | 0.295094 | 0 | 1 | 4 FALSE | MID1IP1   |
| 21254 | 3.388756 | 0 | 0.295094 | 0 | 1 | 4 FALSE | MIER1     |
| 21258 | 3.388756 | 0 | 0.295094 | 0 | 1 | 4 FALSE | MIGA2     |
| 21266 | 3.388756 | 0 | 0.295094 | 0 | 1 | 4 FALSE | MLYCD     |
| 21269 | 3.388756 | 0 | 0.295094 | 0 | 1 | 4 FALSE | MN1       |
| 21276 | 3.388756 | 0 | 0.295094 | 0 | 1 | 4 FALSE | MOSPD2    |
| 21279 | 3.388756 | 0 | 0.295094 | 0 | 1 | 4 FALSE | MPZL1     |
| 21281 | 3.388756 | 0 | 0.295094 | 0 | 1 | 4 FALSE | MREG      |

|       |          |   |          |   |   |         |          |
|-------|----------|---|----------|---|---|---------|----------|
| 21283 | 3.388756 | 0 | 0.295094 | 0 | 1 | 4 FALSE | MRPL17   |
| 21285 | 3.388756 | 0 | 0.295094 | 0 | 1 | 4 FALSE | MRPS2    |
| 21288 | 3.388756 | 0 | 0.295094 | 0 | 1 | 4 FALSE | MST4     |
| 21294 | 3.388756 | 0 | 0.295094 | 0 | 1 | 4 FALSE | MTMR12   |
| 21300 | 3.388756 | 0 | 0.295094 | 0 | 1 | 4 FALSE | MTRNR2L8 |
| 21302 | 3.388756 | 0 | 0.295094 | 0 | 1 | 4 FALSE | MTRR     |
| 21304 | 3.388756 | 0 | 0.295094 | 0 | 1 | 4 FALSE | MTUS1    |
| 21307 | 3.388756 | 0 | 0.295094 | 0 | 1 | 4 FALSE | MXD1     |
| 21309 | 3.388756 | 0 | 0.295094 | 0 | 1 | 4 FALSE | MXRA7    |
| 21312 | 3.388756 | 0 | 0.295094 | 0 | 1 | 4 FALSE | MYCBP2   |
| 21319 | 3.388756 | 0 | 0.295094 | 0 | 1 | 4 FALSE | MZT1     |
| 21321 | 3.388756 | 0 | 0.295094 | 0 | 1 | 4 FALSE | N6AMT1   |
| 21323 | 3.388756 | 0 | 0.295094 | 0 | 1 | 4 FALSE | NAA25    |
| 21325 | 3.388756 | 0 | 0.295094 | 0 | 1 | 4 FALSE | NAA50    |
| 21330 | 3.388756 | 0 | 0.295094 | 0 | 1 | 4 FALSE | NAPB     |
| 21333 | 3.388756 | 0 | 0.295094 | 0 | 1 | 4 FALSE | NAV1     |
| 21337 | 3.388756 | 0 | 0.295094 | 0 | 1 | 4 FALSE | NCDN     |
| 21345 | 3.388756 | 0 | 0.295094 | 0 | 1 | 4 FALSE | NCOA4    |
| 21349 | 3.388756 | 0 | 0.295094 | 0 | 1 | 4 FALSE | NDFIP2   |
| 21351 | 3.388756 | 0 | 0.295094 | 0 | 1 | 4 FALSE | NDRG1    |
| 21353 | 3.388756 | 0 | 0.295094 | 0 | 1 | 4 FALSE | NDUFB2   |
| 21355 | 3.388756 | 0 | 0.295094 | 0 | 1 | 4 FALSE | NDUFB5   |
| 21357 | 3.388756 | 0 | 0.295094 | 0 | 1 | 4 FALSE | NDUFS3   |
| 21360 | 3.388756 | 0 | 0.295094 | 0 | 1 | 4 FALSE | NFATC2IP |
| 21362 | 3.388756 | 0 | 0.295094 | 0 | 1 | 4 FALSE | NFIA     |
| 21366 | 3.388756 | 0 | 0.295094 | 0 | 1 | 4 FALSE | NFX1     |
| 21368 | 3.388756 | 0 | 0.295094 | 0 | 1 | 4 FALSE | NFYA     |
| 21370 | 3.388756 | 0 | 0.295094 | 0 | 1 | 4 FALSE | NICN1    |
| 21374 | 3.388756 | 0 | 0.295094 | 0 | 1 | 4 FALSE | NIPAL2   |
| 21378 | 3.388756 | 0 | 0.295094 | 0 | 1 | 4 FALSE | NME4     |
| 21380 | 3.388756 | 0 | 0.295094 | 0 | 1 | 4 FALSE | NMT2     |
| 21382 | 3.388756 | 0 | 0.295094 | 0 | 1 | 4 FALSE | NOP58    |
| 21384 | 3.388756 | 0 | 0.295094 | 0 | 1 | 4 FALSE | NOTCH3   |
| 21386 | 3.388756 | 0 | 0.295094 | 0 | 1 | 4 FALSE | NPEPL1   |
| 21389 | 3.388756 | 0 | 0.295094 | 0 | 1 | 4 FALSE | NPTX1    |
| 21392 | 3.388756 | 0 | 0.295094 | 0 | 1 | 4 FALSE | NR3C2    |
| 21394 | 3.388756 | 0 | 0.295094 | 0 | 1 | 4 FALSE | NR4A2    |
| 21396 | 3.388756 | 0 | 0.295094 | 0 | 1 | 4 FALSE | NRARP    |
| 21401 | 3.388756 | 0 | 0.295094 | 0 | 1 | 4 FALSE | NRBP1    |
| 21403 | 3.388756 | 0 | 0.295094 | 0 | 1 | 4 FALSE | NRDE2    |
| 21406 | 3.388756 | 0 | 0.295094 | 0 | 1 | 4 FALSE | NSMAF    |
| 21408 | 3.388756 | 0 | 0.295094 | 0 | 1 | 4 FALSE | NT5C2    |
| 21410 | 3.388756 | 0 | 0.295094 | 0 | 1 | 4 FALSE | NUDT19   |
| 21413 | 3.388756 | 0 | 0.295094 | 0 | 1 | 4 FALSE | NUP133   |
| 21420 | 3.388756 | 0 | 0.295094 | 0 | 1 | 4 FALSE | NUP54    |
| 21424 | 3.388756 | 0 | 0.295094 | 0 | 1 | 4 FALSE | NUTF2    |
| 21426 | 3.388756 | 0 | 0.295094 | 0 | 1 | 4 FALSE | OCRL     |



|       |          |   |          |   |   |         |         |
|-------|----------|---|----------|---|---|---------|---------|
| 21428 | 3.388756 | 0 | 0.295094 | 0 | 1 | 4 FALSE | ODF4    |
| 21430 | 3.388756 | 0 | 0.295094 | 0 | 1 | 4 FALSE | OGG1    |
| 21432 | 3.388756 | 0 | 0.295094 | 0 | 1 | 4 FALSE | ORMDL3  |
| 21434 | 3.388756 | 0 | 0.295094 | 0 | 1 | 4 FALSE | OSTC    |
| 21440 | 3.388756 | 0 | 0.295094 | 0 | 1 | 4 FALSE | PABPC4L |
| 21447 | 3.388756 | 0 | 0.295094 | 0 | 1 | 4 FALSE | PAPD4   |
| 21451 | 3.388756 | 0 | 0.295094 | 0 | 1 | 4 FALSE | PARM1   |
| 21457 | 3.388756 | 0 | 0.295094 | 0 | 1 | 4 FALSE | PCDH9   |
| 21459 | 3.388756 | 0 | 0.295094 | 0 | 1 | 4 FALSE | PCDHA9  |
| 21461 | 3.388756 | 0 | 0.295094 | 0 | 1 | 4 FALSE | PCDHGB5 |
| 21466 | 3.388756 | 0 | 0.295094 | 0 | 1 | 4 FALSE | PCNA    |
| 21469 | 3.388756 | 0 | 0.295094 | 0 | 1 | 4 FALSE | PDCD6IP |
| 21471 | 3.388756 | 0 | 0.295094 | 0 | 1 | 4 FALSE | PDE4A   |
| 21475 | 3.388756 | 0 | 0.295094 | 0 | 1 | 4 FALSE | PDE7B   |
| 21477 | 3.388756 | 0 | 0.295094 | 0 | 1 | 4 FALSE | PDHA1   |
| 21479 | 3.388756 | 0 | 0.295094 | 0 | 1 | 4 FALSE | PDIA3   |
| 21482 | 3.388756 | 0 | 0.295094 | 0 | 1 | 4 FALSE | PDRG1   |
| 21485 | 3.388756 | 0 | 0.295094 | 0 | 1 | 4 FALSE | PDSS1   |
| 21490 | 3.388756 | 0 | 0.295094 | 0 | 1 | 4 FALSE | PFDN4   |
| 21492 | 3.388756 | 0 | 0.295094 | 0 | 1 | 4 FALSE | PFKFB4  |
| 21496 | 3.388756 | 0 | 0.295094 | 0 | 1 | 4 FALSE | PGAP2   |
| 21501 | 3.388756 | 0 | 0.295094 | 0 | 1 | 4 FALSE | PGR     |
| 21503 | 3.388756 | 0 | 0.295094 | 0 | 1 | 4 FALSE | PHACTR1 |
| 21505 | 3.388756 | 0 | 0.295094 | 0 | 1 | 4 FALSE | PHC3    |
| 21510 | 3.388756 | 0 | 0.295094 | 0 | 1 | 4 FALSE | PHF6    |
| 21513 | 3.388756 | 0 | 0.295094 | 0 | 1 | 4 FALSE | PHLDA1  |
| 21515 | 3.388756 | 0 | 0.295094 | 0 | 1 | 4 FALSE | PHLDA3  |
| 21517 | 3.388756 | 0 | 0.295094 | 0 | 1 | 4 FALSE | PHLPP1  |
| 21520 | 3.388756 | 0 | 0.295094 | 0 | 1 | 4 FALSE | PI4KA   |
| 21522 | 3.388756 | 0 | 0.295094 | 0 | 1 | 4 FALSE | PI4KB   |
| 21524 | 3.388756 | 0 | 0.295094 | 0 | 1 | 4 FALSE | PIGBOS1 |
| 21526 | 3.388756 | 0 | 0.295094 | 0 | 1 | 4 FALSE | PIGS    |
| 21528 | 3.388756 | 0 | 0.295094 | 0 | 1 | 4 FALSE | PIK3CA  |
| 21532 | 3.388756 | 0 | 0.295094 | 0 | 1 | 4 FALSE | PIK3R3  |
| 21534 | 3.388756 | 0 | 0.295094 | 0 | 1 | 4 FALSE | PIK3R5  |
| 21537 | 3.388756 | 0 | 0.295094 | 0 | 1 | 4 FALSE | PILRB   |
| 21541 | 3.388756 | 0 | 0.295094 | 0 | 1 | 4 FALSE | PKM     |
| 21546 | 3.388756 | 0 | 0.295094 | 0 | 1 | 4 FALSE | PLCL1   |
| 21548 | 3.388756 | 0 | 0.295094 | 0 | 1 | 4 FALSE | PLEKHF2 |
| 21550 | 3.388756 | 0 | 0.295094 | 0 | 1 | 4 FALSE | PLXNA4  |
| 21553 | 3.388756 | 0 | 0.295094 | 0 | 1 | 4 FALSE | PMEPA1  |
| 21555 | 3.388756 | 0 | 0.295094 | 0 | 1 | 4 FALSE | PML     |
| 21557 | 3.388756 | 0 | 0.295094 | 0 | 1 | 4 FALSE | PNRC1   |
| 21564 | 3.388756 | 0 | 0.295094 | 0 | 1 | 4 FALSE | POLR2A  |
| 21568 | 3.388756 | 0 | 0.295094 | 0 | 1 | 4 FALSE | PON2    |
| 21570 | 3.388756 | 0 | 0.295094 | 0 | 1 | 4 FALSE | POP7    |
| 21573 | 3.388756 | 0 | 0.295094 | 0 | 1 | 4 FALSE | PP7080  |

|       |          |   |          |   |   |         |          |
|-------|----------|---|----------|---|---|---------|----------|
| 21575 | 3.388756 | 0 | 0.295094 | 0 | 1 | 4 FALSE | PPARA    |
| 21577 | 3.388756 | 0 | 0.295094 | 0 | 1 | 4 FALSE | PPARD    |
| 21579 | 3.388756 | 0 | 0.295094 | 0 | 1 | 4 FALSE | PPIL1    |
| 21582 | 3.388756 | 0 | 0.295094 | 0 | 1 | 4 FALSE | PPM1G    |
| 21584 | 3.388756 | 0 | 0.295094 | 0 | 1 | 4 FALSE | PPP1R13B |
| 21589 | 3.388756 | 0 | 0.295094 | 0 | 1 | 4 FALSE | PPP2R1B  |
| 21596 | 3.388756 | 0 | 0.295094 | 0 | 1 | 4 FALSE | PPP6R1   |
| 21598 | 3.388756 | 0 | 0.295094 | 0 | 1 | 4 FALSE | PPP6R3   |
| 21603 | 3.388756 | 0 | 0.295094 | 0 | 1 | 4 FALSE | PRDM5    |
| 21609 | 3.388756 | 0 | 0.295094 | 0 | 1 | 4 FALSE | PRKAR2A  |
| 21611 | 3.388756 | 0 | 0.295094 | 0 | 1 | 4 FALSE | PRKCZ    |
| 21613 | 3.388756 | 0 | 0.295094 | 0 | 1 | 4 FALSE | PRKD3    |
| 21615 | 3.388756 | 0 | 0.295094 | 0 | 1 | 4 FALSE | PRKN     |
| 21617 | 3.388756 | 0 | 0.295094 | 0 | 1 | 4 FALSE | PRKRIR   |
| 21622 | 3.388756 | 0 | 0.295094 | 0 | 1 | 4 FALSE | PRMT5    |
| 21628 | 3.388756 | 0 | 0.295094 | 0 | 1 | 4 FALSE | PRR5L    |
| 21632 | 3.388756 | 0 | 0.295094 | 0 | 1 | 4 FALSE | PRRT3    |
| 21634 | 3.388756 | 0 | 0.295094 | 0 | 1 | 4 FALSE | PRTG     |
| 21640 | 3.388756 | 0 | 0.295094 | 0 | 1 | 4 FALSE | PSMA6    |
| 21645 | 3.388756 | 0 | 0.295094 | 0 | 1 | 4 FALSE | PTBP2    |
| 21650 | 3.388756 | 0 | 0.295094 | 0 | 1 | 4 FALSE | PTGES3   |
| 21654 | 3.388756 | 0 | 0.295094 | 0 | 1 | 4 FALSE | PTPRB    |
| 21656 | 3.388756 | 0 | 0.295094 | 0 | 1 | 4 FALSE | PTPRC    |
| 21658 | 3.388756 | 0 | 0.295094 | 0 | 1 | 4 FALSE | PTPRG    |
| 21665 | 3.388756 | 0 | 0.295094 | 0 | 1 | 4 FALSE | PURG     |
| 21672 | 3.388756 | 0 | 0.295094 | 0 | 1 | 4 FALSE | RAB13    |
| 21678 | 3.388756 | 0 | 0.295094 | 0 | 1 | 4 FALSE | RAB23    |
| 21680 | 3.388756 | 0 | 0.295094 | 0 | 1 | 4 FALSE | RAB2A    |
| 21685 | 3.388756 | 0 | 0.295094 | 0 | 1 | 4 FALSE | RAB5B    |
| 21688 | 3.388756 | 0 | 0.295094 | 0 | 1 | 4 FALSE | RABGGTB  |
| 21692 | 3.388756 | 0 | 0.295094 | 0 | 1 | 4 FALSE | RAD51B   |
| 21694 | 3.388756 | 0 | 0.295094 | 0 | 1 | 4 FALSE | RAF1     |
| 21702 | 3.388756 | 0 | 0.295094 | 0 | 1 | 4 FALSE | RAP1GAP2 |
| 21706 | 3.388756 | 0 | 0.295094 | 0 | 1 | 4 FALSE | RAPGEF2  |
| 21708 | 3.388756 | 0 | 0.295094 | 0 | 1 | 4 FALSE | RAPGEF4  |
| 21712 | 3.388756 | 0 | 0.295094 | 0 | 1 | 4 FALSE | RASEF    |
| 21714 | 3.388756 | 0 | 0.295094 | 0 | 1 | 4 FALSE | RASSF2   |
| 21723 | 3.388756 | 0 | 0.295094 | 0 | 1 | 4 FALSE | RBM20    |
| 21728 | 3.388756 | 0 | 0.295094 | 0 | 1 | 4 FALSE | RC3H1    |
| 21731 | 3.388756 | 0 | 0.295094 | 0 | 1 | 4 FALSE | RCAN3    |
| 21733 | 3.388756 | 0 | 0.295094 | 0 | 1 | 4 FALSE | RCHY1    |
| 21736 | 3.388756 | 0 | 0.295094 | 0 | 1 | 4 FALSE | RDX      |
| 21739 | 3.388756 | 0 | 0.295094 | 0 | 1 | 4 FALSE | RERE     |
| 21751 | 3.388756 | 0 | 0.295094 | 0 | 1 | 4 FALSE | RHOT2    |
| 21759 | 3.388756 | 0 | 0.295094 | 0 | 1 | 4 FALSE | RNF145   |
| 21761 | 3.388756 | 0 | 0.295094 | 0 | 1 | 4 FALSE | RNF165   |
| 21763 | 3.388756 | 0 | 0.295094 | 0 | 1 | 4 FALSE | RNF167   |

|       |          |   |          |   |   |         |          |
|-------|----------|---|----------|---|---|---------|----------|
| 21766 | 3.388756 | 0 | 0.295094 | 0 | 1 | 4 FALSE | RNF220   |
| 21771 | 3.388756 | 0 | 0.295094 | 0 | 1 | 4 FALSE | RNF4     |
| 21774 | 3.388756 | 0 | 0.295094 | 0 | 1 | 4 FALSE | RNF6     |
| 21782 | 3.388756 | 0 | 0.295094 | 0 | 1 | 4 FALSE | RPAP2    |
| 21784 | 3.388756 | 0 | 0.295094 | 0 | 1 | 4 FALSE | RPF2     |
| 21788 | 3.388756 | 0 | 0.295094 | 0 | 1 | 4 FALSE | RPL4     |
| 21790 | 3.388756 | 0 | 0.295094 | 0 | 1 | 4 FALSE | RPS13    |
| 21793 | 3.388756 | 0 | 0.295094 | 0 | 1 | 4 FALSE | RPS29    |
| 21796 | 3.388756 | 0 | 0.295094 | 0 | 1 | 4 FALSE | RPS4Y1   |
| 21799 | 3.388756 | 0 | 0.295094 | 0 | 1 | 4 FALSE | RQCD1    |
| 21804 | 3.388756 | 0 | 0.295094 | 0 | 1 | 4 FALSE | RRAS2    |
| 21814 | 3.388756 | 0 | 0.295094 | 0 | 1 | 4 FALSE | RYR2     |
| 21816 | 3.388756 | 0 | 0.295094 | 0 | 1 | 4 FALSE | S1PR1    |
| 21819 | 3.388756 | 0 | 0.295094 | 0 | 1 | 4 FALSE | SAAL1    |
| 21821 | 3.388756 | 0 | 0.295094 | 0 | 1 | 4 FALSE | SALL1    |
| 21823 | 3.388756 | 0 | 0.295094 | 0 | 1 | 4 FALSE | SAMD12   |
| 21826 | 3.388756 | 0 | 0.295094 | 0 | 1 | 4 FALSE | SAMHD1   |
| 21830 | 3.388756 | 0 | 0.295094 | 0 | 1 | 4 FALSE | SAR1B    |
| 21832 | 3.388756 | 0 | 0.295094 | 0 | 1 | 4 FALSE | SATB1    |
| 21834 | 3.388756 | 0 | 0.295094 | 0 | 1 | 4 FALSE | SBF2     |
| 21836 | 3.388756 | 0 | 0.295094 | 0 | 1 | 4 FALSE | SCARA3   |
| 21843 | 3.388756 | 0 | 0.295094 | 0 | 1 | 4 FALSE | SDAD1    |
| 21848 | 3.388756 | 0 | 0.295094 | 0 | 1 | 4 FALSE | SEC11A   |
| 21850 | 3.388756 | 0 | 0.295094 | 0 | 1 | 4 FALSE | SEC13    |
| 21854 | 3.388756 | 0 | 0.295094 | 0 | 1 | 4 FALSE | SEC24D   |
| 21860 | 3.388756 | 0 | 0.295094 | 0 | 1 | 4 FALSE | SEMA4C   |
| 21862 | 3.388756 | 0 | 0.295094 | 0 | 1 | 4 FALSE | SEPHS2   |
| 21868 | 3.388756 | 0 | 0.295094 | 0 | 1 | 4 FALSE | SERPINE2 |
| 21873 | 3.388756 | 0 | 0.295094 | 0 | 1 | 4 FALSE | SF3A1    |
| 21875 | 3.388756 | 0 | 0.295094 | 0 | 1 | 4 FALSE | SF3B1    |
| 21879 | 3.388756 | 0 | 0.295094 | 0 | 1 | 4 FALSE | SFTPA1   |
| 21881 | 3.388756 | 0 | 0.295094 | 0 | 1 | 4 FALSE | SGK1     |
| 21883 | 3.388756 | 0 | 0.295094 | 0 | 1 | 4 FALSE | SH2D3C   |
| 21885 | 3.388756 | 0 | 0.295094 | 0 | 1 | 4 FALSE | SH3BP5L  |
| 21889 | 3.388756 | 0 | 0.295094 | 0 | 1 | 4 FALSE | SIM2     |
| 21891 | 3.388756 | 0 | 0.295094 | 0 | 1 | 4 FALSE | SIN3B    |
| 21894 | 3.388756 | 0 | 0.295094 | 0 | 1 | 4 FALSE | SIPA1L2  |
| 21896 | 3.388756 | 0 | 0.295094 | 0 | 1 | 4 FALSE | SIVA1    |
| 21899 | 3.388756 | 0 | 0.295094 | 0 | 1 | 4 FALSE | SKIDA1   |
| 21902 | 3.388756 | 0 | 0.295094 | 0 | 1 | 4 FALSE | SLAIN1   |
| 21904 | 3.388756 | 0 | 0.295094 | 0 | 1 | 4 FALSE | SLC12A7  |
| 21906 | 3.388756 | 0 | 0.295094 | 0 | 1 | 4 FALSE | SLC25A12 |
| 21908 | 3.388756 | 0 | 0.295094 | 0 | 1 | 4 FALSE | SLC25A24 |
| 21911 | 3.388756 | 0 | 0.295094 | 0 | 1 | 4 FALSE | SLC25A6  |
| 21918 | 3.388756 | 0 | 0.295094 | 0 | 1 | 4 FALSE | SLC31A2  |
| 21920 | 3.388756 | 0 | 0.295094 | 0 | 1 | 4 FALSE | SLC35D1  |
| 21922 | 3.388756 | 0 | 0.295094 | 0 | 1 | 4 FALSE | SLC35F1  |

|       |          |   |          |   |   |         |           |
|-------|----------|---|----------|---|---|---------|-----------|
| 21924 | 3.388756 | 0 | 0.295094 | 0 | 1 | 4 FALSE | SLC36A1   |
| 21926 | 3.388756 | 0 | 0.295094 | 0 | 1 | 4 FALSE | SLC37A1   |
| 21930 | 3.388756 | 0 | 0.295094 | 0 | 1 | 4 FALSE | SLC39A4   |
| 21932 | 3.388756 | 0 | 0.295094 | 0 | 1 | 4 FALSE | SLC39A8   |
| 21934 | 3.388756 | 0 | 0.295094 | 0 | 1 | 4 FALSE | SLC46A1   |
| 21936 | 3.388756 | 0 | 0.295094 | 0 | 1 | 4 FALSE | SLC48A1   |
| 21938 | 3.388756 | 0 | 0.295094 | 0 | 1 | 4 FALSE | SLC6A11   |
| 21940 | 3.388756 | 0 | 0.295094 | 0 | 1 | 4 FALSE | SLC6A6    |
| 21943 | 3.388756 | 0 | 0.295094 | 0 | 1 | 4 FALSE | SLC7A11   |
| 21946 | 3.388756 | 0 | 0.295094 | 0 | 1 | 4 FALSE | SLC9A2    |
| 21948 | 3.388756 | 0 | 0.295094 | 0 | 1 | 4 FALSE | SLC9A6    |
| 21951 | 3.388756 | 0 | 0.295094 | 0 | 1 | 4 FALSE | SLMAP     |
| 21956 | 3.388756 | 0 | 0.295094 | 0 | 1 | 4 FALSE | SMAP1     |
| 21958 | 3.388756 | 0 | 0.295094 | 0 | 1 | 4 FALSE | SMARCA2   |
| 21962 | 3.388756 | 0 | 0.295094 | 0 | 1 | 4 FALSE | SMCHD1    |
| 21964 | 3.388756 | 0 | 0.295094 | 0 | 1 | 4 FALSE | SMEK1     |
| 21966 | 3.388756 | 0 | 0.295094 | 0 | 1 | 4 FALSE | SMG1      |
| 21969 | 3.388756 | 0 | 0.295094 | 0 | 1 | 4 FALSE | SMOC1     |
| 21974 | 3.388756 | 0 | 0.295094 | 0 | 1 | 4 FALSE | SNPH      |
| 21979 | 3.388756 | 0 | 0.295094 | 0 | 1 | 4 FALSE | SNX3      |
| 21981 | 3.388756 | 0 | 0.295094 | 0 | 1 | 4 FALSE | SNX4      |
| 21983 | 3.388756 | 0 | 0.295094 | 0 | 1 | 4 FALSE | SNX5      |
| 21985 | 3.388756 | 0 | 0.295094 | 0 | 1 | 4 FALSE | SOCS1     |
| 21987 | 3.388756 | 0 | 0.295094 | 0 | 1 | 4 FALSE | SOCS3     |
| 21990 | 3.388756 | 0 | 0.295094 | 0 | 1 | 4 FALSE | SOCS5     |
| 21998 | 3.388756 | 0 | 0.295094 | 0 | 1 | 4 FALSE | SOX12     |
| 22001 | 3.388756 | 0 | 0.295094 | 0 | 1 | 4 FALSE | SOX6      |
| 22004 | 3.388756 | 0 | 0.295094 | 0 | 1 | 4 FALSE | SPART     |
| 22011 | 3.388756 | 0 | 0.295094 | 0 | 1 | 4 FALSE | SPRED2    |
| 22018 | 3.388756 | 0 | 0.295094 | 0 | 1 | 4 FALSE | SPTSSB    |
| 22022 | 3.388756 | 0 | 0.295094 | 0 | 1 | 4 FALSE | SRP54     |
| 22024 | 3.388756 | 0 | 0.295094 | 0 | 1 | 4 FALSE | SRPK2     |
| 22026 | 3.388756 | 0 | 0.295094 | 0 | 1 | 4 FALSE | SRSF4     |
| 22028 | 3.388756 | 0 | 0.295094 | 0 | 1 | 4 FALSE | SRSF6     |
| 22032 | 3.388756 | 0 | 0.295094 | 0 | 1 | 4 FALSE | ST3GAL5   |
| 22034 | 3.388756 | 0 | 0.295094 | 0 | 1 | 4 FALSE | ST6GALNAI |
| 22036 | 3.388756 | 0 | 0.295094 | 0 | 1 | 4 FALSE | ST7       |
| 22042 | 3.388756 | 0 | 0.295094 | 0 | 1 | 4 FALSE | STK24     |
| 22051 | 3.388756 | 0 | 0.295094 | 0 | 1 | 4 FALSE | STX11     |
| 22055 | 3.388756 | 0 | 0.295094 | 0 | 1 | 4 FALSE | STX6      |
| 22058 | 3.388756 | 0 | 0.295094 | 0 | 1 | 4 FALSE | SUCLA2    |
| 22060 | 3.388756 | 0 | 0.295094 | 0 | 1 | 4 FALSE | SUCO      |
| 22065 | 3.388756 | 0 | 0.295094 | 0 | 1 | 4 FALSE | SYBU      |
| 22067 | 3.388756 | 0 | 0.295094 | 0 | 1 | 4 FALSE | SYDE1     |
| 22069 | 3.388756 | 0 | 0.295094 | 0 | 1 | 4 FALSE | SYN2      |
| 22077 | 3.388756 | 0 | 0.295094 | 0 | 1 | 4 FALSE | TAF4      |
| 22082 | 3.388756 | 0 | 0.295094 | 0 | 1 | 4 FALSE | TARS2     |

|       |          |          |          |   |    |   |       |                  |
|-------|----------|----------|----------|---|----|---|-------|------------------|
| 22084 | 3.388756 | 0        | 0.295094 | 0 | 1  | 4 | FALSE | TBC1D10B         |
| 22088 | 3.388756 | 0        | 0.295094 | 0 | 1  | 4 | FALSE | TBC1D25          |
| 22090 | 3.388756 | 0        | 0.295094 | 0 | 1  | 4 | FALSE | TBC1D4           |
| 22096 | 3.388756 | 0        | 0.295094 | 0 | 1  | 4 | FALSE | TCEB3            |
| 22098 | 3.388756 | 0        | 0.295094 | 0 | 1  | 4 | FALSE | TDGF1            |
| 22101 | 3.388756 | 0        | 0.295094 | 0 | 1  | 4 | FALSE | TF               |
| 22103 | 3.388756 | 0        | 0.295094 | 0 | 1  | 4 | FALSE | TFB1M            |
| 22107 | 3.388756 | 0        | 0.295094 | 0 | 1  | 4 | FALSE | TGFBRAP1         |
| 22115 | 3.388756 | 0        | 0.295094 | 0 | 1  | 4 | FALSE | TIMM23           |
| 22117 | 3.388756 | 0        | 0.295094 | 0 | 1  | 4 | FALSE | TIPARP           |
| 22120 | 3.388756 | 0        | 0.295094 | 0 | 1  | 4 | FALSE | TJAP1            |
| 22122 | 3.388756 | 0        | 0.295094 | 0 | 1  | 4 | FALSE | TK2              |
| 22125 | 3.388756 | 0        | 0.295094 | 0 | 1  | 4 | FALSE | TLR10            |
| 22128 | 3.388756 | 0        | 0.295094 | 0 | 1  | 4 | FALSE | TLR7             |
| 22135 | 3.388756 | 0        | 0.295094 | 0 | 1  | 4 | FALSE | TMEM117          |
| 22139 | 3.388756 | 0        | 0.295094 | 0 | 1  | 4 | FALSE | TMEM132I         |
| 22141 | 3.388756 | 0        | 0.295094 | 0 | 1  | 4 | FALSE | TMEM138          |
| 22143 | 3.388756 | 0        | 0.295094 | 0 | 1  | 4 | FALSE | TMEM159          |
| 22145 | 3.388756 | 0        | 0.295094 | 0 | 1  | 4 | FALSE | TMEM167I         |
| 22149 | 3.388756 | 0        | 0.295094 | 0 | 1  | 4 | FALSE | TMEM2            |
| 22151 | 3.388756 | 0        | 0.295094 | 0 | 1  | 4 | FALSE | TMEM203          |
| 22155 | 3.388756 | 0        | 0.295094 | 0 | 1  | 4 | FALSE | TMEM25           |
| 22158 | 3.388756 | 0        | 0.295094 | 0 | 1  | 4 | FALSE | TMEM45A          |
| 22162 | 3.388756 | 0        | 0.295094 | 0 | 1  | 4 | FALSE | TMEM87B          |
| 22505 | 2.97659  | 0.014519 | 0.335955 | 0 | 88 | 5 | FALSE | miRNA hsa-miR-33 |
| 22166 | 3.388756 | 0        | 0.295094 | 0 | 1  | 4 | FALSE | TMTC1            |
| 22169 | 3.388756 | 0        | 0.295094 | 0 | 1  | 4 | FALSE | TMX4             |
| 22175 | 3.388756 | 0        | 0.295094 | 0 | 1  | 4 | FALSE | TNFRSF11A        |
| 22177 | 3.388756 | 0        | 0.295094 | 0 | 1  | 4 | FALSE | TNFRSF12A        |
| 22179 | 3.388756 | 0        | 0.295094 | 0 | 1  | 4 | FALSE | TNFRSF1A         |
| 22181 | 3.388756 | 0        | 0.295094 | 0 | 1  | 4 | FALSE | TNFRSF1B         |
| 22191 | 3.388756 | 0        | 0.295094 | 0 | 1  | 4 | FALSE | TOMM22           |
| 22194 | 3.388756 | 0        | 0.295094 | 0 | 1  | 4 | FALSE | TOPBP1           |
| 22203 | 3.388756 | 0        | 0.295094 | 0 | 1  | 4 | FALSE | TPM4             |
| 22208 | 3.388756 | 0        | 0.295094 | 0 | 1  | 4 | FALSE | TRAPPC10         |
| 22210 | 3.388756 | 0        | 0.295094 | 0 | 1  | 4 | FALSE | TRIM11           |
| 22219 | 3.388756 | 0        | 0.295094 | 0 | 1  | 4 | FALSE | TRIM39           |
| 22223 | 3.388756 | 0        | 0.295094 | 0 | 1  | 4 | FALSE | TRPC3            |
| 22225 | 3.388756 | 0        | 0.295094 | 0 | 1  | 4 | FALSE | TRPM7            |
| 22228 | 3.388756 | 0        | 0.295094 | 0 | 1  | 4 | FALSE | TSHZ3            |
| 22231 | 3.388756 | 0        | 0.295094 | 0 | 1  | 4 | FALSE | TSR1             |
| 22233 | 3.388756 | 0        | 0.295094 | 0 | 1  | 4 | FALSE | TTC5             |
| 22235 | 3.388756 | 0        | 0.295094 | 0 | 1  | 4 | FALSE | TTC9             |
| 22237 | 3.388756 | 0        | 0.295094 | 0 | 1  | 4 | FALSE | TTF2             |
| 22239 | 3.388756 | 0        | 0.295094 | 0 | 1  | 4 | FALSE | TUB              |
| 22242 | 3.388756 | 0        | 0.295094 | 0 | 1  | 4 | FALSE | TWF1             |
| 22244 | 3.388756 | 0        | 0.295094 | 0 | 1  | 4 | FALSE | TWIST2           |

|       |          |          |          |   |     |   |       |       |            |
|-------|----------|----------|----------|---|-----|---|-------|-------|------------|
| 22246 | 3.388756 | 0        | 0.295094 | 0 | 1   | 4 | FALSE |       | TXLNA      |
| 22249 | 3.388756 | 0        | 0.295094 | 0 | 1   | 4 | FALSE |       | UACA       |
| 22259 | 3.388756 | 0        | 0.295094 | 0 | 1   | 4 | FALSE |       | UBE2K      |
| 22263 | 3.388756 | 0        | 0.295094 | 0 | 1   | 4 | FALSE |       | UBE2Q2     |
| 22266 | 3.388756 | 0        | 0.295094 | 0 | 1   | 4 | FALSE |       | UBE3D      |
| 22277 | 3.388756 | 0        | 0.295094 | 0 | 1   | 4 | FALSE |       | UCHL1      |
| 22282 | 3.388756 | 0        | 0.295094 | 0 | 1   | 4 | FALSE |       | URGCP-MR   |
| 22285 | 3.388756 | 0        | 0.295094 | 0 | 1   | 4 | FALSE |       | USP13      |
| 22287 | 3.388756 | 0        | 0.295094 | 0 | 1   | 4 | FALSE |       | USP14      |
| 22294 | 3.388756 | 0        | 0.295094 | 0 | 1   | 4 | FALSE |       | VAMP1      |
| 22300 | 3.388756 | 0        | 0.295094 | 0 | 1   | 4 | FALSE |       | VCPIP1     |
| 22305 | 3.388756 | 0        | 0.295094 | 0 | 1   | 4 | FALSE |       | VMP1       |
| 22307 | 3.388756 | 0        | 0.295094 | 0 | 1   | 4 | FALSE |       | VPS29      |
| 22311 | 3.388756 | 0        | 0.295094 | 0 | 1   | 4 | FALSE |       | VPS37A     |
| 22315 | 3.388756 | 0        | 0.295094 | 0 | 1   | 4 | FALSE |       | VPS39      |
| 22318 | 3.388756 | 0        | 0.295094 | 0 | 1   | 4 | FALSE |       | VPS4B      |
| 22320 | 3.388756 | 0        | 0.295094 | 0 | 1   | 4 | FALSE |       | VTI1A      |
| 22324 | 3.388756 | 0        | 0.295094 | 0 | 1   | 4 | FALSE |       | WARS       |
| 22327 | 3.388756 | 0        | 0.295094 | 0 | 1   | 4 | FALSE |       | WBP1L      |
| 22331 | 3.388756 | 0        | 0.295094 | 0 | 1   | 4 | FALSE |       | WBP4       |
| 22333 | 3.388756 | 0        | 0.295094 | 0 | 1   | 4 | FALSE |       | WDFY3      |
| 22335 | 3.388756 | 0        | 0.295094 | 0 | 1   | 4 | FALSE |       | WDR1       |
| 22638 | 2.81659  | 0.094402 | 0.355039 | 0 | 489 | 3 | FALSE | miRNA | hsa-miR-34 |
| 22337 | 3.388756 | 0        | 0.295094 | 0 | 1   | 4 | FALSE |       | WDR18      |
| 22339 | 3.388756 | 0        | 0.295094 | 0 | 1   | 4 | FALSE |       | WDR20      |
| 22341 | 3.388756 | 0        | 0.295094 | 0 | 1   | 4 | FALSE |       | WDR26      |
| 22346 | 3.388756 | 0        | 0.295094 | 0 | 1   | 4 | FALSE |       | WDR44      |
| 22348 | 3.388756 | 0        | 0.295094 | 0 | 1   | 4 | FALSE |       | WDR45B     |
| 22351 | 3.388756 | 0        | 0.295094 | 0 | 1   | 4 | FALSE |       | WNK3       |
| 22353 | 3.388756 | 0        | 0.295094 | 0 | 1   | 4 | FALSE |       | WNT10A     |
| 22355 | 3.388756 | 0        | 0.295094 | 0 | 1   | 4 | FALSE |       | WNT3       |
| 22357 | 3.388756 | 0        | 0.295094 | 0 | 1   | 4 | FALSE |       | WNT7B      |
| 22360 | 3.388756 | 0        | 0.295094 | 0 | 1   | 4 | FALSE |       | WWTR1      |
| 22362 | 3.388756 | 0        | 0.295094 | 0 | 1   | 4 | FALSE |       | XDH        |
| 22365 | 3.388756 | 0        | 0.295094 | 0 | 1   | 4 | FALSE |       | XPO1       |
| 22368 | 3.388756 | 0        | 0.295094 | 0 | 1   | 4 | FALSE |       | YAF2       |
| 22370 | 3.388756 | 0        | 0.295094 | 0 | 1   | 4 | FALSE |       | YBX1       |
| 22372 | 3.388756 | 0        | 0.295094 | 0 | 1   | 4 | FALSE |       | YIPF6      |
| 22375 | 3.388756 | 0        | 0.295094 | 0 | 1   | 4 | FALSE |       | YRDC       |
| 22377 | 3.388756 | 0        | 0.295094 | 0 | 1   | 4 | FALSE |       | YTHDF1     |
| 22385 | 3.388756 | 0        | 0.295094 | 0 | 1   | 4 | FALSE |       | ZBTB14     |
| 22394 | 3.388756 | 0        | 0.295094 | 0 | 1   | 4 | FALSE |       | ZBTB7B     |
| 22396 | 3.388756 | 0        | 0.295094 | 0 | 1   | 4 | FALSE |       | ZC3H7A     |
| 22398 | 3.388756 | 0        | 0.295094 | 0 | 1   | 4 | FALSE |       | ZC3HAV1    |
| 22401 | 3.388756 | 0        | 0.295094 | 0 | 1   | 4 | FALSE |       | ZDHHC18    |
| 22404 | 3.388756 | 0        | 0.295094 | 0 | 1   | 4 | FALSE |       | ZDHHC7     |
| 22406 | 3.388756 | 0        | 0.295094 | 0 | 1   | 4 | FALSE |       | ZER1       |

|       |          |   |          |   |   |         |           |
|-------|----------|---|----------|---|---|---------|-----------|
| 22411 | 3.388756 | 0 | 0.295094 | 0 | 1 | 4 FALSE | ZFP91-CNT |
| 22425 | 3.388756 | 0 | 0.295094 | 0 | 1 | 4 FALSE | ZNF134    |
| 22428 | 3.388756 | 0 | 0.295094 | 0 | 1 | 4 FALSE | ZNF154    |
| 22430 | 3.388756 | 0 | 0.295094 | 0 | 1 | 4 FALSE | ZNF17     |
| 22434 | 3.388756 | 0 | 0.295094 | 0 | 1 | 4 FALSE | ZNF227    |
| 22438 | 3.388756 | 0 | 0.295094 | 0 | 1 | 4 FALSE | ZNF280B   |
| 22440 | 3.388756 | 0 | 0.295094 | 0 | 1 | 4 FALSE | ZNF287    |
| 22442 | 3.388756 | 0 | 0.295094 | 0 | 1 | 4 FALSE | ZNF304    |
| 22444 | 3.388756 | 0 | 0.295094 | 0 | 1 | 4 FALSE | ZNF317    |
| 22446 | 3.388756 | 0 | 0.295094 | 0 | 1 | 4 FALSE | ZNF324    |
| 22448 | 3.388756 | 0 | 0.295094 | 0 | 1 | 4 FALSE | ZNF354B   |
| 22451 | 3.388756 | 0 | 0.295094 | 0 | 1 | 4 FALSE | ZNF423    |
| 22455 | 3.388756 | 0 | 0.295094 | 0 | 1 | 4 FALSE | ZNF436    |
| 22460 | 3.388756 | 0 | 0.295094 | 0 | 1 | 4 FALSE | ZNF516    |
| 22462 | 3.388756 | 0 | 0.295094 | 0 | 1 | 4 FALSE | ZNF518A   |
| 22464 | 3.388756 | 0 | 0.295094 | 0 | 1 | 4 FALSE | ZNF526    |
| 22466 | 3.388756 | 0 | 0.295094 | 0 | 1 | 4 FALSE | ZNF544    |
| 22468 | 3.388756 | 0 | 0.295094 | 0 | 1 | 4 FALSE | ZNF562    |
| 22470 | 3.388756 | 0 | 0.295094 | 0 | 1 | 4 FALSE | ZNF583    |
| 22475 | 3.388756 | 0 | 0.295094 | 0 | 1 | 4 FALSE | ZNF621    |
| 22481 | 3.388756 | 0 | 0.295094 | 0 | 1 | 4 FALSE | ZNF680    |
| 22483 | 3.388756 | 0 | 0.295094 | 0 | 1 | 4 FALSE | ZNF704    |
| 22486 | 3.388756 | 0 | 0.295094 | 0 | 1 | 4 FALSE | ZNF718    |
| 22488 | 3.388756 | 0 | 0.295094 | 0 | 1 | 4 FALSE | ZNF721    |
| 22490 | 3.388756 | 0 | 0.295094 | 0 | 1 | 4 FALSE | ZNF726    |
| 22492 | 3.388756 | 0 | 0.295094 | 0 | 1 | 4 FALSE | ZNF736    |
| 22497 | 3.388756 | 0 | 0.295094 | 0 | 1 | 4 FALSE | ZNF805    |
| 22500 | 3.388756 | 0 | 0.295094 | 0 | 1 | 4 FALSE | ZNF91     |
| 22508 | 3.976406 | 0 | 0.251483 | 0 | 1 | 6 FALSE | ACTR3     |
| 22510 | 3.976406 | 0 | 0.251483 | 0 | 1 | 6 FALSE | ACTR5     |
| 22514 | 3.976406 | 0 | 0.251483 | 0 | 1 | 6 FALSE | BEST3     |
| 22516 | 3.976406 | 0 | 0.251483 | 0 | 1 | 6 FALSE | C1orf210  |
| 22518 | 3.976406 | 0 | 0.251483 | 0 | 1 | 6 FALSE | CASP1     |
| 22520 | 3.976406 | 0 | 0.251483 | 0 | 1 | 6 FALSE | CDC42BPG  |
| 22522 | 3.976406 | 0 | 0.251483 | 0 | 1 | 6 FALSE | CDKN2AIP  |
| 22524 | 3.976406 | 0 | 0.251483 | 0 | 1 | 6 FALSE | CLDN1     |
| 22528 | 3.976406 | 0 | 0.251483 | 0 | 1 | 6 FALSE | COIL      |
| 22531 | 3.976406 | 0 | 0.251483 | 0 | 1 | 6 FALSE | COQ7      |
| 22545 | 3.976406 | 0 | 0.251483 | 0 | 1 | 6 FALSE | GDF7      |
| 22548 | 3.976406 | 0 | 0.251483 | 0 | 1 | 6 FALSE | HOPX      |
| 22550 | 3.976406 | 0 | 0.251483 | 0 | 1 | 6 FALSE | IBA57     |
| 22553 | 3.976406 | 0 | 0.251483 | 0 | 1 | 6 FALSE | ITPRIPL1  |
| 22555 | 3.976406 | 0 | 0.251483 | 0 | 1 | 6 FALSE | KIF1C     |
| 22566 | 3.976406 | 0 | 0.251483 | 0 | 1 | 6 FALSE | MZF1      |
| 22568 | 3.976406 | 0 | 0.251483 | 0 | 1 | 6 FALSE | NFATC3    |
| 22570 | 3.976406 | 0 | 0.251483 | 0 | 1 | 6 FALSE | NXPE3     |
| 22572 | 3.976406 | 0 | 0.251483 | 0 | 1 | 6 FALSE | OPRM1     |

|       |          |   |          |   |   |   |       |          |
|-------|----------|---|----------|---|---|---|-------|----------|
| 22578 | 3.976406 | 0 | 0.251483 | 0 | 1 | 6 | FALSE | PIGN     |
| 22581 | 3.976406 | 0 | 0.251483 | 0 | 1 | 6 | FALSE | PLEKHG7  |
| 22591 | 3.976406 | 0 | 0.251483 | 0 | 1 | 6 | FALSE | ROBO4    |
| 22593 | 3.976406 | 0 | 0.251483 | 0 | 1 | 6 | FALSE | RUNX1T1  |
| 22596 | 3.976406 | 0 | 0.251483 | 0 | 1 | 6 | FALSE | SMIM14   |
| 22599 | 3.976406 | 0 | 0.251483 | 0 | 1 | 6 | FALSE | SNX16    |
| 22601 | 3.976406 | 0 | 0.251483 | 0 | 1 | 6 | FALSE | SPN      |
| 22608 | 3.976406 | 0 | 0.251483 | 0 | 1 | 6 | FALSE | TFAM     |
| 22611 | 3.976406 | 0 | 0.251483 | 0 | 1 | 6 | FALSE | THBS2    |
| 22613 | 3.976406 | 0 | 0.251483 | 0 | 1 | 6 | FALSE | TMEM236  |
| 22616 | 3.976406 | 0 | 0.251483 | 0 | 1 | 6 | FALSE | TRABD2A  |
| 22623 | 3.976406 | 0 | 0.251483 | 0 | 1 | 6 | FALSE | VASH2    |
| 22626 | 3.976406 | 0 | 0.251483 | 0 | 1 | 6 | FALSE | ZDHHC23  |
| 22628 | 3.976406 | 0 | 0.251483 | 0 | 1 | 6 | FALSE | ZFP30    |
| 22631 | 3.976406 | 0 | 0.251483 | 0 | 1 | 6 | FALSE | ZNF326   |
| 22633 | 3.976406 | 0 | 0.251483 | 0 | 1 | 6 | FALSE | ZNF347   |
| 22636 | 3.976406 | 0 | 0.251483 | 0 | 1 | 6 | FALSE | ZWILCH   |
| 22640 | 3.816406 | 0 | 0.262027 | 0 | 1 | 4 | FALSE | ABCA5    |
| 22642 | 3.816406 | 0 | 0.262027 | 0 | 1 | 4 | FALSE | ACADSB   |
| 22646 | 3.816406 | 0 | 0.262027 | 0 | 1 | 4 | FALSE | ADAM12   |
| 22648 | 3.816406 | 0 | 0.262027 | 0 | 1 | 4 | FALSE | ADAP1    |
| 22650 | 3.816406 | 0 | 0.262027 | 0 | 1 | 4 | FALSE | ADGRG3   |
| 22653 | 3.816406 | 0 | 0.262027 | 0 | 1 | 4 | FALSE | AKAP10   |
| 22655 | 3.816406 | 0 | 0.262027 | 0 | 1 | 4 | FALSE | AKAP13   |
| 22658 | 3.816406 | 0 | 0.262027 | 0 | 1 | 4 | FALSE | ALG3     |
| 22660 | 3.816406 | 0 | 0.262027 | 0 | 1 | 4 | FALSE | AMPD2    |
| 22667 | 3.816406 | 0 | 0.262027 | 0 | 1 | 4 | FALSE | ARFGEF2  |
| 22673 | 3.816406 | 0 | 0.262027 | 0 | 1 | 4 | FALSE | ARHGDIG  |
| 22681 | 3.816406 | 0 | 0.262027 | 0 | 1 | 4 | FALSE | ATP6V0A1 |
| 22683 | 3.816406 | 0 | 0.262027 | 0 | 1 | 4 | FALSE | ATP6V1E1 |
| 22691 | 3.816406 | 0 | 0.262027 | 0 | 1 | 4 | FALSE | AXL      |
| 22693 | 3.816406 | 0 | 0.262027 | 0 | 1 | 4 | FALSE | B3GALT4  |
| 22700 | 3.816406 | 0 | 0.262027 | 0 | 1 | 4 | FALSE | BCORL1   |
| 22702 | 3.816406 | 0 | 0.262027 | 0 | 1 | 4 | FALSE | BIRC2    |
| 22704 | 3.816406 | 0 | 0.262027 | 0 | 1 | 4 | FALSE | BLOC1S3  |
| 22706 | 3.816406 | 0 | 0.262027 | 0 | 1 | 4 | FALSE | BMF      |
| 22710 | 3.816406 | 0 | 0.262027 | 0 | 1 | 4 | FALSE | BTBD2    |
| 22716 | 3.816406 | 0 | 0.262027 | 0 | 1 | 4 | FALSE | C15orf52 |
| 22718 | 3.816406 | 0 | 0.262027 | 0 | 1 | 4 | FALSE | C18orf32 |
| 22728 | 3.816406 | 0 | 0.262027 | 0 | 1 | 4 | FALSE | CBX3     |
| 22731 | 3.816406 | 0 | 0.262027 | 0 | 1 | 4 | FALSE | CC2D1B   |
| 22734 | 3.816406 | 0 | 0.262027 | 0 | 1 | 4 | FALSE | CCL22    |
| 22740 | 3.816406 | 0 | 0.262027 | 0 | 1 | 4 | FALSE | CD48     |
| 22742 | 3.816406 | 0 | 0.262027 | 0 | 1 | 4 | FALSE | CDC27    |
| 22746 | 3.816406 | 0 | 0.262027 | 0 | 1 | 4 | FALSE | CDK12    |
| 22761 | 3.816406 | 0 | 0.262027 | 0 | 1 | 4 | FALSE | CHD8     |
| 22765 | 3.816406 | 0 | 0.262027 | 0 | 1 | 4 | FALSE | CLASRP   |



|       |          |   |          |   |   |         |         |
|-------|----------|---|----------|---|---|---------|---------|
| 22767 | 3.816406 | 0 | 0.262027 | 0 | 1 | 4 FALSE | CLCN6   |
| 22770 | 3.816406 | 0 | 0.262027 | 0 | 1 | 4 FALSE | CLIC5   |
| 22776 | 3.816406 | 0 | 0.262027 | 0 | 1 | 4 FALSE | CNOT3   |
| 22780 | 3.816406 | 0 | 0.262027 | 0 | 1 | 4 FALSE | CNPPD1  |
| 22784 | 3.816406 | 0 | 0.262027 | 0 | 1 | 4 FALSE | COPZ1   |
| 22787 | 3.816406 | 0 | 0.262027 | 0 | 1 | 4 FALSE | CRABP2  |
| 22789 | 3.816406 | 0 | 0.262027 | 0 | 1 | 4 FALSE | CTDP1   |
| 22791 | 3.816406 | 0 | 0.262027 | 0 | 1 | 4 FALSE | CTDSP1  |
| 22795 | 3.816406 | 0 | 0.262027 | 0 | 1 | 4 FALSE | CTPS1   |
| 22797 | 3.816406 | 0 | 0.262027 | 0 | 1 | 4 FALSE | CTSB    |
| 22799 | 3.816406 | 0 | 0.262027 | 0 | 1 | 4 FALSE | CYTH3   |
| 22801 | 3.816406 | 0 | 0.262027 | 0 | 1 | 4 FALSE | DBNL    |
| 22803 | 3.816406 | 0 | 0.262027 | 0 | 1 | 4 FALSE | DCHS1   |
| 22805 | 3.816406 | 0 | 0.262027 | 0 | 1 | 4 FALSE | DCTN5   |
| 22807 | 3.816406 | 0 | 0.262027 | 0 | 1 | 4 FALSE | DDA1    |
| 22811 | 3.816406 | 0 | 0.262027 | 0 | 1 | 4 FALSE | DENND4B |
| 22813 | 3.816406 | 0 | 0.262027 | 0 | 1 | 4 FALSE | DGAT2L6 |
| 22819 | 3.816406 | 0 | 0.262027 | 0 | 1 | 4 FALSE | DMWD    |
| 22821 | 3.816406 | 0 | 0.262027 | 0 | 1 | 4 FALSE | DNAAF3  |
| 22823 | 3.816406 | 0 | 0.262027 | 0 | 1 | 4 FALSE | DOK3    |
| 22827 | 3.816406 | 0 | 0.262027 | 0 | 1 | 4 FALSE | DYRK3   |
| 22830 | 3.816406 | 0 | 0.262027 | 0 | 1 | 4 FALSE | E2F5    |
| 22833 | 3.816406 | 0 | 0.262027 | 0 | 1 | 4 FALSE | EDIL3   |
| 22836 | 3.816406 | 0 | 0.262027 | 0 | 1 | 4 FALSE | EFNB1   |
| 22839 | 3.816406 | 0 | 0.262027 | 0 | 1 | 4 FALSE | EMD     |
| 22842 | 3.816406 | 0 | 0.262027 | 0 | 1 | 4 FALSE | EPB41L3 |
| 22844 | 3.816406 | 0 | 0.262027 | 0 | 1 | 4 FALSE | ERF     |
| 22847 | 3.816406 | 0 | 0.262027 | 0 | 1 | 4 FALSE | FAM104A |
| 22850 | 3.816406 | 0 | 0.262027 | 0 | 1 | 4 FALSE | FAM76A  |
| 22854 | 3.816406 | 0 | 0.262027 | 0 | 1 | 4 FALSE | FBXO5   |
| 22859 | 3.816406 | 0 | 0.262027 | 0 | 1 | 4 FALSE | FLOT2   |
| 22864 | 3.816406 | 0 | 0.262027 | 0 | 1 | 4 FALSE | FOSL1   |
| 22869 | 3.816406 | 0 | 0.262027 | 0 | 1 | 4 FALSE | FOXRED1 |
| 22874 | 3.816406 | 0 | 0.262027 | 0 | 1 | 4 FALSE | GABBR2  |
| 22876 | 3.816406 | 0 | 0.262027 | 0 | 1 | 4 FALSE | GABRA3  |
| 22878 | 3.816406 | 0 | 0.262027 | 0 | 1 | 4 FALSE | GALNT7  |
| 22881 | 3.816406 | 0 | 0.262027 | 0 | 1 | 4 FALSE | GANAB   |
| 22883 | 3.816406 | 0 | 0.262027 | 0 | 1 | 4 FALSE | GAPDH   |
| 22887 | 3.816406 | 0 | 0.262027 | 0 | 1 | 4 FALSE | GBX1    |
| 22891 | 3.816406 | 0 | 0.262027 | 0 | 1 | 4 FALSE | GIT1    |
| 22895 | 3.816406 | 0 | 0.262027 | 0 | 1 | 4 FALSE | GLYR1   |
| 22902 | 3.816406 | 0 | 0.262027 | 0 | 1 | 4 FALSE | GPR133  |
| 22906 | 3.816406 | 0 | 0.262027 | 0 | 1 | 4 FALSE | GPR156  |
| 22908 | 3.816406 | 0 | 0.262027 | 0 | 1 | 4 FALSE | GRAMD4  |
| 22911 | 3.816406 | 0 | 0.262027 | 0 | 1 | 4 FALSE | GRM7    |
| 22916 | 3.816406 | 0 | 0.262027 | 0 | 1 | 4 FALSE | HAPLN3  |
| 22919 | 3.816406 | 0 | 0.262027 | 0 | 1 | 4 FALSE | HIP1R   |

|       |          |   |          |   |   |         |            |
|-------|----------|---|----------|---|---|---------|------------|
| 22921 | 3.816406 | 0 | 0.262027 | 0 | 1 | 4 FALSE | HIRIP3     |
| 22923 | 3.816406 | 0 | 0.262027 | 0 | 1 | 4 FALSE | HK1        |
| 22925 | 3.816406 | 0 | 0.262027 | 0 | 1 | 4 FALSE | HN1L       |
| 22929 | 3.816406 | 0 | 0.262027 | 0 | 1 | 4 FALSE | HNRNPUL2   |
| 22932 | 3.816406 | 0 | 0.262027 | 0 | 1 | 4 FALSE | HOXA13     |
| 22938 | 3.816406 | 0 | 0.262027 | 0 | 1 | 4 FALSE | IFI35      |
| 22944 | 3.816406 | 0 | 0.262027 | 0 | 1 | 4 FALSE | IL6R       |
| 22949 | 3.816406 | 0 | 0.262027 | 0 | 1 | 4 FALSE | IQCJ-SCHIP |
| 22952 | 3.816406 | 0 | 0.262027 | 0 | 1 | 4 FALSE | IRF3       |
| 22955 | 3.816406 | 0 | 0.262027 | 0 | 1 | 4 FALSE | ITGB3      |
| 22959 | 3.816406 | 0 | 0.262027 | 0 | 1 | 4 FALSE | JOSD2      |
| 22968 | 3.816406 | 0 | 0.262027 | 0 | 1 | 4 FALSE | KLHDC10    |
| 22972 | 3.816406 | 0 | 0.262027 | 0 | 1 | 4 FALSE | KT112      |
| 22974 | 3.816406 | 0 | 0.262027 | 0 | 1 | 4 FALSE | LAPTM4A    |
| 22977 | 3.816406 | 0 | 0.262027 | 0 | 1 | 4 FALSE | LDHA       |
| 22982 | 3.816406 | 0 | 0.262027 | 0 | 1 | 4 FALSE | LLGL1      |
| 22986 | 3.816406 | 0 | 0.262027 | 0 | 1 | 4 FALSE | LRRC32     |
| 22999 | 3.816406 | 0 | 0.262027 | 0 | 1 | 4 FALSE | MAPT       |
| 23006 | 3.816406 | 0 | 0.262027 | 0 | 1 | 4 FALSE | MCFD2      |
| 23013 | 3.816406 | 0 | 0.262027 | 0 | 1 | 4 FALSE | MEGF8      |
| 23017 | 3.816406 | 0 | 0.262027 | 0 | 1 | 4 FALSE | MFSD8      |
| 23021 | 3.816406 | 0 | 0.262027 | 0 | 1 | 4 FALSE | MIEF1      |
| 23029 | 3.816406 | 0 | 0.262027 | 0 | 1 | 4 FALSE | MOAP1      |
| 23034 | 3.816406 | 0 | 0.262027 | 0 | 1 | 4 FALSE | MTHFR      |
| 23036 | 3.816406 | 0 | 0.262027 | 0 | 1 | 4 FALSE | MTMR9      |
| 23038 | 3.816406 | 0 | 0.262027 | 0 | 1 | 4 FALSE | MUC2       |
| 23040 | 3.816406 | 0 | 0.262027 | 0 | 1 | 4 FALSE | MXD4       |
| 23043 | 3.816406 | 0 | 0.262027 | 0 | 1 | 4 FALSE | MYB        |
| 23045 | 3.816406 | 0 | 0.262027 | 0 | 1 | 4 FALSE | MYBL2      |
| 23052 | 3.816406 | 0 | 0.262027 | 0 | 1 | 4 FALSE | MYO19      |
| 23057 | 3.816406 | 0 | 0.262027 | 0 | 1 | 4 FALSE | NAT8L      |
| 23059 | 3.816406 | 0 | 0.262027 | 0 | 1 | 4 FALSE | NEUROD2    |
| 23062 | 3.816406 | 0 | 0.262027 | 0 | 1 | 4 FALSE | NFKBIA     |
| 23068 | 3.816406 | 0 | 0.262027 | 0 | 1 | 4 FALSE | NOTCH4     |
| 23072 | 3.816406 | 0 | 0.262027 | 0 | 1 | 4 FALSE | NR2C2AP    |
| 23074 | 3.816406 | 0 | 0.262027 | 0 | 1 | 4 FALSE | NTN1       |
| 23076 | 3.816406 | 0 | 0.262027 | 0 | 1 | 4 FALSE | NTN4       |
| 23082 | 3.816406 | 0 | 0.262027 | 0 | 1 | 4 FALSE | NUP210     |
| 23084 | 3.816406 | 0 | 0.262027 | 0 | 1 | 4 FALSE | NXF1       |
| 23086 | 3.816406 | 0 | 0.262027 | 0 | 1 | 4 FALSE | OXNAD1     |
| 23090 | 3.816406 | 0 | 0.262027 | 0 | 1 | 4 FALSE | PANK2      |
| 23093 | 3.816406 | 0 | 0.262027 | 0 | 1 | 4 FALSE | PAPLN      |
| 23095 | 3.816406 | 0 | 0.262027 | 0 | 1 | 4 FALSE | PARP1      |
| 23099 | 3.816406 | 0 | 0.262027 | 0 | 1 | 4 FALSE | PCNXL3     |
| 23105 | 3.816406 | 0 | 0.262027 | 0 | 1 | 4 FALSE | PEA15      |
| 23108 | 3.816406 | 0 | 0.262027 | 0 | 1 | 4 FALSE | PEX16      |
| 23110 | 3.816406 | 0 | 0.262027 | 0 | 1 | 4 FALSE | PHB        |

|       |          |          |          |   |     |   |       |       |            |
|-------|----------|----------|----------|---|-----|---|-------|-------|------------|
| 23112 | 3.816406 | 0        | 0.262027 | 0 | 1   | 4 | FALSE |       | PHF19      |
| 23114 | 3.816406 | 0        | 0.262027 | 0 | 1   | 4 | FALSE |       | PIGX       |
| 23116 | 3.816406 | 0        | 0.262027 | 0 | 1   | 4 | FALSE |       | PLA2G2D    |
| 23118 | 3.816406 | 0        | 0.262027 | 0 | 1   | 4 | FALSE |       | PLK2       |
| 23125 | 3.816406 | 0        | 0.262027 | 0 | 1   | 4 | FALSE |       | PPAN-P2RY  |
| 23131 | 3.816406 | 0        | 0.262027 | 0 | 1   | 4 | FALSE |       | PPP2R1A    |
| 23133 | 3.816406 | 0        | 0.262027 | 0 | 1   | 4 | FALSE |       | PRCC       |
| 23136 | 3.816406 | 0        | 0.262027 | 0 | 1   | 4 | FALSE |       | PRRT2      |
| 23143 | 3.816406 | 0        | 0.262027 | 0 | 1   | 4 | FALSE |       | PTENP1     |
| 23150 | 3.816406 | 0        | 0.262027 | 0 | 1   | 4 | FALSE |       | RAB11FIP4  |
| 23153 | 3.816406 | 0        | 0.262027 | 0 | 1   | 4 | FALSE |       | RAI14      |
| 23155 | 3.816406 | 0        | 0.262027 | 0 | 1   | 4 | FALSE |       | RALY       |
| 23166 | 3.816406 | 0        | 0.262027 | 0 | 1   | 4 | FALSE |       | RHBDF2     |
| 23170 | 3.816406 | 0        | 0.262027 | 0 | 1   | 4 | FALSE |       | RPS12      |
| 23173 | 3.816406 | 0        | 0.262027 | 0 | 1   | 4 | FALSE |       | RTL8A      |
| 23176 | 3.816406 | 0        | 0.262027 | 0 | 1   | 4 | FALSE |       | RWDD2A     |
| 23179 | 3.816406 | 0        | 0.262027 | 0 | 1   | 4 | FALSE |       | SARS2      |
| 23184 | 3.816406 | 0        | 0.262027 | 0 | 1   | 4 | FALSE |       | SCRN1      |
| 23358 | 2.906175 | 0.043171 | 0.344095 | 0 | 246 | 3 | FALSE | miRNA | hsa-miR-36 |
| 23189 | 3.816406 | 0        | 0.262027 | 0 | 1   | 4 | FALSE |       | SF3A2      |
| 23192 | 3.816406 | 0        | 0.262027 | 0 | 1   | 4 | FALSE |       | SHANK3     |
| 23196 | 3.816406 | 0        | 0.262027 | 0 | 1   | 4 | FALSE |       | SKI        |
| 23199 | 3.816406 | 0        | 0.262027 | 0 | 1   | 4 | FALSE |       | SLC35G2    |
| 23207 | 3.816406 | 0        | 0.262027 | 0 | 1   | 4 | FALSE |       | SNCA       |
| 23212 | 3.816406 | 0        | 0.262027 | 0 | 1   | 4 | FALSE |       | SPAM1      |
| 23216 | 3.816406 | 0        | 0.262027 | 0 | 1   | 4 | FALSE |       | SRSF2      |
| 23219 | 3.816406 | 0        | 0.262027 | 0 | 1   | 4 | FALSE |       | SSX5       |
| 23224 | 3.816406 | 0        | 0.262027 | 0 | 1   | 4 | FALSE |       | STK25      |
| 23226 | 3.816406 | 0        | 0.262027 | 0 | 1   | 4 | FALSE |       | STK38L     |
| 23228 | 3.816406 | 0        | 0.262027 | 0 | 1   | 4 | FALSE |       | SYNGR2     |
| 23233 | 3.816406 | 0        | 0.262027 | 0 | 1   | 4 | FALSE |       | TBC1D23    |
| 23236 | 3.816406 | 0        | 0.262027 | 0 | 1   | 4 | FALSE |       | TEX22      |
| 23238 | 3.816406 | 0        | 0.262027 | 0 | 1   | 4 | FALSE |       | TFEB       |
| 23244 | 3.816406 | 0        | 0.262027 | 0 | 1   | 4 | FALSE |       | TIAF1      |
| 23247 | 3.816406 | 0        | 0.262027 | 0 | 1   | 4 | FALSE |       | TJP2       |
| 23255 | 3.816406 | 0        | 0.262027 | 0 | 1   | 4 | FALSE |       | TMEM246    |
| 23257 | 3.816406 | 0        | 0.262027 | 0 | 1   | 4 | FALSE |       | TMLHE      |
| 23259 | 3.816406 | 0        | 0.262027 | 0 | 1   | 4 | FALSE |       | TNFSF12-TI |
| 23261 | 3.816406 | 0        | 0.262027 | 0 | 1   | 4 | FALSE |       | TNK2       |
| 23263 | 3.816406 | 0        | 0.262027 | 0 | 1   | 4 | FALSE |       | TNKS1BP1   |
| 23270 | 3.816406 | 0        | 0.262027 | 0 | 1   | 4 | FALSE |       | TOP2A      |
| 23272 | 3.816406 | 0        | 0.262027 | 0 | 1   | 4 | FALSE |       | TPCN2      |
| 23275 | 3.816406 | 0        | 0.262027 | 0 | 1   | 4 | FALSE |       | TRIM41     |
| 23280 | 3.816406 | 0        | 0.262027 | 0 | 1   | 4 | FALSE |       | TTK        |
| 23288 | 3.816406 | 0        | 0.262027 | 0 | 1   | 4 | FALSE |       | UBE2S      |
| 23290 | 3.816406 | 0        | 0.262027 | 0 | 1   | 4 | FALSE |       | UBIAD1     |
| 23292 | 3.816406 | 0        | 0.262027 | 0 | 1   | 4 | FALSE |       | UBL4A      |

|       |          |   |          |   |   |         |          |
|-------|----------|---|----------|---|---|---------|----------|
| 23295 | 3.816406 | 0 | 0.262027 | 0 | 1 | 4 FALSE | UBXN2B   |
| 23297 | 3.816406 | 0 | 0.262027 | 0 | 1 | 4 FALSE | ULBP2    |
| 23300 | 3.816406 | 0 | 0.262027 | 0 | 1 | 4 FALSE | UNG      |
| 23304 | 3.816406 | 0 | 0.262027 | 0 | 1 | 4 FALSE | UST      |
| 23306 | 3.816406 | 0 | 0.262027 | 0 | 1 | 4 FALSE | VASN     |
| 23314 | 3.816406 | 0 | 0.262027 | 0 | 1 | 4 FALSE | VPS37D   |
| 23317 | 3.816406 | 0 | 0.262027 | 0 | 1 | 4 FALSE | XBP1     |
| 23319 | 3.816406 | 0 | 0.262027 | 0 | 1 | 4 FALSE | XBP1P1   |
| 23322 | 3.816406 | 0 | 0.262027 | 0 | 1 | 4 FALSE | XRN1     |
| 23325 | 3.816406 | 0 | 0.262027 | 0 | 1 | 4 FALSE | ZAP70    |
| 23327 | 3.816406 | 0 | 0.262027 | 0 | 1 | 4 FALSE | ZBED3    |
| 23333 | 3.816406 | 0 | 0.262027 | 0 | 1 | 4 FALSE | ZCCHC3   |
| 23337 | 3.816406 | 0 | 0.262027 | 0 | 1 | 4 FALSE | ZFAT     |
| 23342 | 3.816406 | 0 | 0.262027 | 0 | 1 | 4 FALSE | ZNF551   |
| 23344 | 3.816406 | 0 | 0.262027 | 0 | 1 | 4 FALSE | ZNF587   |
| 23346 | 3.816406 | 0 | 0.262027 | 0 | 1 | 4 FALSE | ZNF614   |
| 23350 | 3.816406 | 0 | 0.262027 | 0 | 1 | 4 FALSE | ZNF7     |
| 23353 | 3.816406 | 0 | 0.262027 | 0 | 1 | 4 FALSE | ZNF783   |
| 23356 | 3.816406 | 0 | 0.262027 | 0 | 1 | 4 FALSE | ZRSR1    |
| 23359 | 3.905991 | 0 | 0.256017 | 0 | 1 | 4 FALSE | 4-Mar    |
| 23361 | 3.905991 | 0 | 0.256017 | 0 | 1 | 4 FALSE | ABCD2    |
| 23366 | 3.905991 | 0 | 0.256017 | 0 | 1 | 4 FALSE | AGK      |
| 23368 | 3.905991 | 0 | 0.256017 | 0 | 1 | 4 FALSE | AK4      |
| 23371 | 3.905991 | 0 | 0.256017 | 0 | 1 | 4 FALSE | ALG13    |
| 23373 | 3.905991 | 0 | 0.256017 | 0 | 1 | 4 FALSE | ANKRD40  |
| 23379 | 3.905991 | 0 | 0.256017 | 0 | 1 | 4 FALSE | ARNTL    |
| 23381 | 3.905991 | 0 | 0.256017 | 0 | 1 | 4 FALSE | ARRDC1   |
| 23383 | 3.905991 | 0 | 0.256017 | 0 | 1 | 4 FALSE | ATP6VOA2 |
| 23386 | 3.905991 | 0 | 0.256017 | 0 | 1 | 4 FALSE | BACE2    |
| 23388 | 3.905991 | 0 | 0.256017 | 0 | 1 | 4 FALSE | BAIAP2L1 |
| 23390 | 3.905991 | 0 | 0.256017 | 0 | 1 | 4 FALSE | BCL10    |
| 23392 | 3.905991 | 0 | 0.256017 | 0 | 1 | 4 FALSE | BOD1L1   |
| 23400 | 3.905991 | 0 | 0.256017 | 0 | 1 | 4 FALSE | C6orf120 |
| 23403 | 3.905991 | 0 | 0.256017 | 0 | 1 | 4 FALSE | C8orf88  |
| 23406 | 3.905991 | 0 | 0.256017 | 0 | 1 | 4 FALSE | CCBL2    |
| 23409 | 3.905991 | 0 | 0.256017 | 0 | 1 | 4 FALSE | CCDC71L  |
| 23411 | 3.905991 | 0 | 0.256017 | 0 | 1 | 4 FALSE | CCNB1IP1 |
| 23422 | 3.905991 | 0 | 0.256017 | 0 | 1 | 4 FALSE | CPE      |
| 23430 | 3.905991 | 0 | 0.256017 | 0 | 1 | 4 FALSE | CYCS     |
| 23434 | 3.905991 | 0 | 0.256017 | 0 | 1 | 4 FALSE | DARS     |
| 23436 | 3.905991 | 0 | 0.256017 | 0 | 1 | 4 FALSE | DCAF6    |
| 23438 | 3.905991 | 0 | 0.256017 | 0 | 1 | 4 FALSE | DCDC2    |
| 23446 | 3.905991 | 0 | 0.256017 | 0 | 1 | 4 FALSE | DOCK10   |
| 23450 | 3.905991 | 0 | 0.256017 | 0 | 1 | 4 FALSE | DPP8     |
| 23458 | 3.905991 | 0 | 0.256017 | 0 | 1 | 4 FALSE | ENDOD1   |
| 23470 | 3.905991 | 0 | 0.256017 | 0 | 1 | 4 FALSE | FOXA1    |
| 23472 | 3.905991 | 0 | 0.256017 | 0 | 1 | 4 FALSE | FOXC1    |

|       |          |          |          |   |    |   |       |       |            |
|-------|----------|----------|----------|---|----|---|-------|-------|------------|
| 23475 | 3.905991 | 0        | 0.256017 | 0 | 1  | 4 | FALSE |       | FOXN2      |
| 23478 | 3.905991 | 0        | 0.256017 | 0 | 1  | 4 | FALSE |       | GABARAP    |
| 23482 | 3.905991 | 0        | 0.256017 | 0 | 1  | 4 | FALSE |       | GJA3       |
| 23486 | 3.905991 | 0        | 0.256017 | 0 | 1  | 4 | FALSE |       | GRIK4      |
| 23488 | 3.905991 | 0        | 0.256017 | 0 | 1  | 4 | FALSE |       | GTPBP8     |
| 23491 | 3.905991 | 0        | 0.256017 | 0 | 1  | 4 | FALSE |       | HAUS5      |
| 23495 | 3.905991 | 0        | 0.256017 | 0 | 1  | 4 | FALSE |       | HGFAC      |
| 23497 | 3.905991 | 0        | 0.256017 | 0 | 1  | 4 | FALSE |       | HIC2       |
| 23499 | 3.905991 | 0        | 0.256017 | 0 | 1  | 4 | FALSE |       | HMGN1      |
| 23504 | 3.905991 | 0        | 0.256017 | 0 | 1  | 4 | FALSE |       | HYLS1      |
| 23507 | 3.905991 | 0        | 0.256017 | 0 | 1  | 4 | FALSE |       | IL21R      |
| 23509 | 3.905991 | 0        | 0.256017 | 0 | 1  | 4 | FALSE |       | INPP4A     |
| 23511 | 3.905991 | 0        | 0.256017 | 0 | 1  | 4 | FALSE |       | IPMK       |
| 23513 | 3.905991 | 0        | 0.256017 | 0 | 1  | 4 | FALSE |       | IRF2       |
| 23518 | 3.905991 | 0        | 0.256017 | 0 | 1  | 4 | FALSE |       | KCTD5      |
| 23520 | 3.905991 | 0        | 0.256017 | 0 | 1  | 4 | FALSE |       | KLHL36     |
| 23522 | 3.905991 | 0        | 0.256017 | 0 | 1  | 4 | FALSE |       | KLHL6      |
| 23529 | 3.905991 | 0        | 0.256017 | 0 | 1  | 4 | FALSE |       | LRRC16A    |
| 23532 | 3.905991 | 0        | 0.256017 | 0 | 1  | 4 | FALSE |       | MARK3      |
| 23537 | 3.905991 | 0        | 0.256017 | 0 | 1  | 4 | FALSE |       | MEF2C      |
| 23539 | 3.905991 | 0        | 0.256017 | 0 | 1  | 4 | FALSE |       | METTL20    |
| 23541 | 3.905991 | 0        | 0.256017 | 0 | 1  | 4 | FALSE |       | MFAP1      |
| 23548 | 3.905991 | 0        | 0.256017 | 0 | 1  | 4 | FALSE |       | MPP6       |
| 23550 | 3.905991 | 0        | 0.256017 | 0 | 1  | 4 | FALSE |       | MRPS18C    |
| 23553 | 3.905991 | 0        | 0.256017 | 0 | 1  | 4 | FALSE |       | N4BP2      |
| 23556 | 3.905991 | 0        | 0.256017 | 0 | 1  | 4 | FALSE |       | NEU3       |
| 23559 | 3.905991 | 0        | 0.256017 | 0 | 1  | 4 | FALSE |       | NRXN1      |
| 23561 | 3.905991 | 0        | 0.256017 | 0 | 1  | 4 | FALSE |       | NUB1       |
| 23564 | 3.905991 | 0        | 0.256017 | 0 | 1  | 4 | FALSE |       | OPHN1      |
| 23568 | 3.905991 | 0        | 0.256017 | 0 | 1  | 4 | FALSE |       | PAK6       |
| 23570 | 3.905991 | 0        | 0.256017 | 0 | 1  | 4 | FALSE |       | PAX5       |
| 23572 | 3.905991 | 0        | 0.256017 | 0 | 1  | 4 | FALSE |       | PBRM1      |
| 23574 | 3.905991 | 0        | 0.256017 | 0 | 1  | 4 | FALSE |       | PCDH15     |
| 23576 | 3.905991 | 0        | 0.256017 | 0 | 1  | 4 | FALSE |       | PCM1       |
| 23714 | 2.999816 | 0.005479 | 0.333354 | 0 | 47 | 5 | FALSE | miRNA | hsa-miR-37 |
| 23582 | 3.905991 | 0        | 0.256017 | 0 | 1  | 4 | FALSE |       | PGRMC1     |
| 23589 | 3.905991 | 0        | 0.256017 | 0 | 1  | 4 | FALSE |       | PLBD2      |
| 23594 | 3.905991 | 0        | 0.256017 | 0 | 1  | 4 | FALSE |       | PPP1R12B   |
| 23596 | 3.905991 | 0        | 0.256017 | 0 | 1  | 4 | FALSE |       | PPP1R8     |
| 23599 | 3.905991 | 0        | 0.256017 | 0 | 1  | 4 | FALSE |       | PSIP1      |
| 23601 | 3.905991 | 0        | 0.256017 | 0 | 1  | 4 | FALSE |       | PSMD14     |
| 23604 | 3.905991 | 0        | 0.256017 | 0 | 1  | 4 | FALSE |       | PYURF      |
| 23610 | 3.905991 | 0        | 0.256017 | 0 | 1  | 4 | FALSE |       | RAB3GAP2   |
| 23615 | 3.905991 | 0        | 0.256017 | 0 | 1  | 4 | FALSE |       | RBM8A      |
| 23621 | 3.905991 | 0        | 0.256017 | 0 | 1  | 4 | FALSE |       | RNF2       |
| 23625 | 3.905991 | 0        | 0.256017 | 0 | 1  | 4 | FALSE |       | RRM2B      |
| 23628 | 3.905991 | 0        | 0.256017 | 0 | 1  | 4 | FALSE |       | SAP18      |

|       |          |          |          |   |     |   |       |       |            |
|-------|----------|----------|----------|---|-----|---|-------|-------|------------|
| 23630 | 3.905991 | 0        | 0.256017 | 0 | 1   | 4 | FALSE |       | SAT2       |
| 23633 | 3.905991 | 0        | 0.256017 | 0 | 1   | 4 | FALSE |       | SCML2      |
| 23636 | 3.905991 | 0        | 0.256017 | 0 | 1   | 4 | FALSE |       | SH3RF3     |
| 23638 | 3.905991 | 0        | 0.256017 | 0 | 1   | 4 | FALSE |       | SHROOM3    |
| 23640 | 3.905991 | 0        | 0.256017 | 0 | 1   | 4 | FALSE |       | SLC16A7    |
| 23779 | 2.96     | 0.022087 | 0.337838 | 0 | 122 | 5 | FALSE | miRNA | hsa-miR-38 |
| 23644 | 3.905991 | 0        | 0.256017 | 0 | 1   | 4 | FALSE |       | SLC7A7     |
| 23646 | 3.905991 | 0        | 0.256017 | 0 | 1   | 4 | FALSE |       | SLC9A8     |
| 23649 | 3.905991 | 0        | 0.256017 | 0 | 1   | 4 | FALSE |       | SNX10      |
| 23651 | 3.905991 | 0        | 0.256017 | 0 | 1   | 4 | FALSE |       | ST6GALNA4  |
| 23657 | 3.905991 | 0        | 0.256017 | 0 | 1   | 4 | FALSE |       | THAP4      |
| 23660 | 3.905991 | 0        | 0.256017 | 0 | 1   | 4 | FALSE |       | TM4SF1     |
| 23662 | 3.905991 | 0        | 0.256017 | 0 | 1   | 4 | FALSE |       | TMA16      |
| 23668 | 3.905991 | 0        | 0.256017 | 0 | 1   | 4 | FALSE |       | TRAM2      |
| 23670 | 3.905991 | 0        | 0.256017 | 0 | 1   | 4 | FALSE |       | TRIM38     |
| 23675 | 3.905991 | 0        | 0.256017 | 0 | 1   | 4 | FALSE |       | TSFM       |
| 23682 | 3.905991 | 0        | 0.256017 | 0 | 1   | 4 | FALSE |       | UNC119B    |
| 23686 | 3.905991 | 0        | 0.256017 | 0 | 1   | 4 | FALSE |       | XRCC2      |
| 23693 | 3.905991 | 0        | 0.256017 | 0 | 1   | 4 | FALSE |       | ZBTB46     |
| 23697 | 3.905991 | 0        | 0.256017 | 0 | 1   | 4 | FALSE |       | ZCCHC6     |
| 23699 | 3.905991 | 0        | 0.256017 | 0 | 1   | 4 | FALSE |       | ZDHHC20    |
| 23706 | 3.905991 | 0        | 0.256017 | 0 | 1   | 4 | FALSE |       | ZNF418     |
| 23710 | 3.905991 | 0        | 0.256017 | 0 | 1   | 4 | FALSE |       | ZNF699     |
| 23712 | 3.905991 | 0        | 0.256017 | 0 | 1   | 4 | FALSE |       | ZNF791     |
| 23720 | 3.999631 | 0        | 0.250023 | 0 | 1   | 6 | FALSE |       | C2orf72    |
| 23727 | 3.999631 | 0        | 0.250023 | 0 | 1   | 6 | FALSE |       | CELF4      |
| 23730 | 3.999631 | 0        | 0.250023 | 0 | 1   | 6 | FALSE |       | DCTPP1     |
| 23732 | 3.999631 | 0        | 0.250023 | 0 | 1   | 6 | FALSE |       | DEPDC5     |
| 23734 | 3.999631 | 0        | 0.250023 | 0 | 1   | 6 | FALSE |       | DPY19L3    |
| 23740 | 3.999631 | 0        | 0.250023 | 0 | 1   | 6 | FALSE |       | IGDCC3     |
| 23745 | 3.999631 | 0        | 0.250023 | 0 | 1   | 6 | FALSE |       | LGSN       |
| 23749 | 3.999631 | 0        | 0.250023 | 0 | 1   | 6 | FALSE |       | NDST1      |
| 23757 | 3.999631 | 0        | 0.250023 | 0 | 1   | 6 | FALSE |       | PRKD2      |
| 23761 | 3.999631 | 0        | 0.250023 | 0 | 1   | 6 | FALSE |       | RCC2       |
| 23766 | 3.999631 | 0        | 0.250023 | 0 | 1   | 6 | FALSE |       | SPA17      |
| 23770 | 3.999631 | 0        | 0.250023 | 0 | 1   | 6 | FALSE |       | TXNL1      |
| 23777 | 3.999631 | 0        | 0.250023 | 0 | 1   | 6 | FALSE |       | ZNF609     |
| 23782 | 3.959816 | 0        | 0.252537 | 0 | 1   | 6 | FALSE |       | ACTR8      |
| 23790 | 3.959816 | 0        | 0.252537 | 0 | 1   | 6 | FALSE |       | BRD7       |
| 23793 | 3.959816 | 0        | 0.252537 | 0 | 1   | 6 | FALSE |       | C9orf41    |
| 23797 | 3.959816 | 0        | 0.252537 | 0 | 1   | 6 | FALSE |       | CAPN7      |
| 23799 | 3.959816 | 0        | 0.252537 | 0 | 1   | 6 | FALSE |       | CASC4      |
| 23803 | 3.959816 | 0        | 0.252537 | 0 | 1   | 6 | FALSE |       | CD244      |
| 23805 | 3.959816 | 0        | 0.252537 | 0 | 1   | 6 | FALSE |       | CDK19      |
| 23811 | 3.959816 | 0        | 0.252537 | 0 | 1   | 6 | FALSE |       | CLPB       |
| 23813 | 3.959816 | 0        | 0.252537 | 0 | 1   | 6 | FALSE |       | CNIH1      |
| 23815 | 3.959816 | 0        | 0.252537 | 0 | 1   | 6 | FALSE |       | COX6C      |

|       |          |          |          |   |     |   |       |       |            |
|-------|----------|----------|----------|---|-----|---|-------|-------|------------|
| 23819 | 3.959816 | 0        | 0.252537 | 0 | 1   | 6 | FALSE |       | DUSP3      |
| 23821 | 3.959816 | 0        | 0.252537 | 0 | 1   | 6 | FALSE |       | ENO2       |
| 23826 | 3.959816 | 0        | 0.252537 | 0 | 1   | 6 | FALSE |       | FUBP3      |
| 23828 | 3.959816 | 0        | 0.252537 | 0 | 1   | 6 | FALSE |       | GABRB2     |
| 23832 | 3.959816 | 0        | 0.252537 | 0 | 1   | 6 | FALSE |       | GP5        |
| 23834 | 3.959816 | 0        | 0.252537 | 0 | 1   | 6 | FALSE |       | HERC2      |
| 23844 | 3.959816 | 0        | 0.252537 | 0 | 1   | 6 | FALSE |       | KIAA2022   |
| 23849 | 3.959816 | 0        | 0.252537 | 0 | 1   | 6 | FALSE |       | LIMS3      |
| 23851 | 3.959816 | 0        | 0.252537 | 0 | 1   | 6 | FALSE |       | LIMS4      |
| 23853 | 3.959816 | 0        | 0.252537 | 0 | 1   | 6 | FALSE |       | LIPA       |
| 23856 | 3.959816 | 0        | 0.252537 | 0 | 1   | 6 | FALSE |       | LTBP1      |
| 23858 | 3.959816 | 0        | 0.252537 | 0 | 1   | 6 | FALSE |       | LY6K       |
| 23862 | 3.959816 | 0        | 0.252537 | 0 | 1   | 6 | FALSE |       | MEAF6      |
| 23868 | 3.959816 | 0        | 0.252537 | 0 | 1   | 6 | FALSE |       | NDUFV3     |
| 23872 | 3.959816 | 0        | 0.252537 | 0 | 1   | 6 | FALSE |       | NSRP1      |
| 23876 | 3.959816 | 0        | 0.252537 | 0 | 1   | 6 | FALSE |       | PCTP       |
| 23879 | 3.959816 | 0        | 0.252537 | 0 | 1   | 6 | FALSE |       | PHLDB2     |
| 23960 | 3.020829 | 0.008075 | 0.331035 | 0 | 44  | 5 | FALSE | miRNA | hsa-miR-45 |
| 23882 | 3.959816 | 0        | 0.252537 | 0 | 1   | 6 | FALSE |       | PITPNC1    |
| 23886 | 3.959816 | 0        | 0.252537 | 0 | 1   | 6 | FALSE |       | PRKAA2     |
| 23891 | 3.959816 | 0        | 0.252537 | 0 | 1   | 6 | FALSE |       | RBM47      |
| 23894 | 3.959816 | 0        | 0.252537 | 0 | 1   | 6 | FALSE |       | RIMBP2     |
| 23897 | 3.959816 | 0        | 0.252537 | 0 | 1   | 6 | FALSE |       | RSL24D1    |
| 23899 | 3.959816 | 0        | 0.252537 | 0 | 1   | 6 | FALSE |       | S100A14    |
| 23902 | 3.959816 | 0        | 0.252537 | 0 | 1   | 6 | FALSE |       | SDHAF2     |
| 23904 | 3.959816 | 0        | 0.252537 | 0 | 1   | 6 | FALSE |       | SELENOI    |
| 23906 | 3.959816 | 0        | 0.252537 | 0 | 1   | 6 | FALSE |       | SETD2      |
| 23908 | 3.959816 | 0        | 0.252537 | 0 | 1   | 6 | FALSE |       | SLC30A6    |
| 23913 | 3.959816 | 0        | 0.252537 | 0 | 1   | 6 | FALSE |       | ST8SIA1    |
| 23915 | 3.959816 | 0        | 0.252537 | 0 | 1   | 6 | FALSE |       | STPG1      |
| 23922 | 3.959816 | 0        | 0.252537 | 0 | 1   | 6 | FALSE |       | SUV420H1   |
| 23925 | 3.959816 | 0        | 0.252537 | 0 | 1   | 6 | FALSE |       | TARS       |
| 23927 | 3.959816 | 0        | 0.252537 | 0 | 1   | 6 | FALSE |       | TFCP2      |
| 23932 | 3.959816 | 0        | 0.252537 | 0 | 1   | 6 | FALSE |       | TP53BP2    |
| 23935 | 3.959816 | 0        | 0.252537 | 0 | 1   | 6 | FALSE |       | TRMT10B    |
| 23937 | 3.959816 | 0        | 0.252537 | 0 | 1   | 6 | FALSE |       | TXK        |
| 23939 | 3.959816 | 0        | 0.252537 | 0 | 1   | 6 | FALSE |       | TYRP1      |
| 23944 | 3.959816 | 0        | 0.252537 | 0 | 1   | 6 | FALSE |       | VIMP       |
| 23950 | 3.959816 | 0        | 0.252537 | 0 | 1   | 6 | FALSE |       | ZCRB1      |
| 23952 | 3.959816 | 0        | 0.252537 | 0 | 1   | 6 | FALSE |       | ZKSCAN2    |
| 23955 | 3.959816 | 0        | 0.252537 | 0 | 1   | 6 | FALSE |       | ZNF616     |
| 23957 | 3.959816 | 0        | 0.252537 | 0 | 1   | 6 | FALSE |       | ZNF697     |
| 24029 | 2.925714 | 0.042152 | 0.341797 | 0 | 226 | 5 | FALSE | miRNA | hsa-miR-45 |
| 23962 | 4.020645 | 0        | 0.248716 | 0 | 1   | 6 | FALSE |       | ADCY9      |
| 23964 | 4.020645 | 0        | 0.248716 | 0 | 1   | 6 | FALSE |       | AMH        |
| 23966 | 4.020645 | 0        | 0.248716 | 0 | 1   | 6 | FALSE |       | ARHGAP40   |
| 23970 | 4.020645 | 0        | 0.248716 | 0 | 1   | 6 | FALSE |       | BARHL1     |

|       |          |   |          |   |   |   |       |           |
|-------|----------|---|----------|---|---|---|-------|-----------|
| 23972 | 4.020645 | 0 | 0.248716 | 0 | 1 | 6 | FALSE | BRSK2     |
| 23976 | 4.020645 | 0 | 0.248716 | 0 | 1 | 6 | FALSE | CAPNS1    |
| 23978 | 4.020645 | 0 | 0.248716 | 0 | 1 | 6 | FALSE | CERS1     |
| 23980 | 4.020645 | 0 | 0.248716 | 0 | 1 | 6 | FALSE | CSTF1     |
| 23987 | 4.020645 | 0 | 0.248716 | 0 | 1 | 6 | FALSE | IRAK3     |
| 23989 | 4.020645 | 0 | 0.248716 | 0 | 1 | 6 | FALSE | KIAA0754  |
| 23992 | 4.020645 | 0 | 0.248716 | 0 | 1 | 6 | FALSE | LEPROTL1  |
| 23997 | 4.020645 | 0 | 0.248716 | 0 | 1 | 6 | FALSE | NKX2-3    |
| 23999 | 4.020645 | 0 | 0.248716 | 0 | 1 | 6 | FALSE | PEX26     |
| 24003 | 4.020645 | 0 | 0.248716 | 0 | 1 | 6 | FALSE | PTGIS     |
| 24006 | 4.020645 | 0 | 0.248716 | 0 | 1 | 6 | FALSE | RGS6      |
| 24008 | 4.020645 | 0 | 0.248716 | 0 | 1 | 6 | FALSE | RPS27L    |
| 24010 | 4.020645 | 0 | 0.248716 | 0 | 1 | 6 | FALSE | SCAF4     |
| 24012 | 4.020645 | 0 | 0.248716 | 0 | 1 | 6 | FALSE | STRN4     |
| 24014 | 4.020645 | 0 | 0.248716 | 0 | 1 | 6 | FALSE | TAF1      |
| 24016 | 4.020645 | 0 | 0.248716 | 0 | 1 | 6 | FALSE | TMEM63C   |
| 24027 | 4.020645 | 0 | 0.248716 | 0 | 1 | 6 | FALSE | ZRANB2    |
| 24031 | 3.92553  | 0 | 0.254743 | 0 | 1 | 6 | FALSE | ABCC6     |
| 24033 | 3.92553  | 0 | 0.254743 | 0 | 1 | 6 | FALSE | AGAP9     |
| 24035 | 3.92553  | 0 | 0.254743 | 0 | 1 | 6 | FALSE | AHCYL2    |
| 24037 | 3.92553  | 0 | 0.254743 | 0 | 1 | 6 | FALSE | AIG1      |
| 24040 | 3.92553  | 0 | 0.254743 | 0 | 1 | 6 | FALSE | ALKBH5    |
| 24045 | 3.92553  | 0 | 0.254743 | 0 | 1 | 6 | FALSE | ASTN2     |
| 24048 | 3.92553  | 0 | 0.254743 | 0 | 1 | 6 | FALSE | BACH2     |
| 24051 | 3.92553  | 0 | 0.254743 | 0 | 1 | 6 | FALSE | C12orf55  |
| 24053 | 3.92553  | 0 | 0.254743 | 0 | 1 | 6 | FALSE | C14orf144 |
| 24057 | 3.92553  | 0 | 0.254743 | 0 | 1 | 6 | FALSE | CABLES1   |
| 24064 | 3.92553  | 0 | 0.254743 | 0 | 1 | 6 | FALSE | CCNT1     |
| 24067 | 3.92553  | 0 | 0.254743 | 0 | 1 | 6 | FALSE | CDC42SE1  |
| 24071 | 3.92553  | 0 | 0.254743 | 0 | 1 | 6 | FALSE | CES2      |
| 24077 | 3.92553  | 0 | 0.254743 | 0 | 1 | 6 | FALSE | CRMP1     |
| 24079 | 3.92553  | 0 | 0.254743 | 0 | 1 | 6 | FALSE | CTTNBP2N  |
| 24084 | 3.92553  | 0 | 0.254743 | 0 | 1 | 6 | FALSE | DPY19L4   |
| 24086 | 3.92553  | 0 | 0.254743 | 0 | 1 | 6 | FALSE | DUSP9     |
| 24088 | 3.92553  | 0 | 0.254743 | 0 | 1 | 6 | FALSE | EIF5AL1   |
| 24091 | 3.92553  | 0 | 0.254743 | 0 | 1 | 6 | FALSE | ELP6      |
| 24095 | 3.92553  | 0 | 0.254743 | 0 | 1 | 6 | FALSE | FAM129B   |
| 24101 | 3.92553  | 0 | 0.254743 | 0 | 1 | 6 | FALSE | FOXO6     |
| 24103 | 3.92553  | 0 | 0.254743 | 0 | 1 | 6 | FALSE | FSTL4     |
| 24109 | 3.92553  | 0 | 0.254743 | 0 | 1 | 6 | FALSE | GATA6     |
| 24114 | 3.92553  | 0 | 0.254743 | 0 | 1 | 6 | FALSE | GOLGA8H   |
| 24116 | 3.92553  | 0 | 0.254743 | 0 | 1 | 6 | FALSE | GOLGA8J   |
| 24118 | 3.92553  | 0 | 0.254743 | 0 | 1 | 6 | FALSE | GOLGA8M   |
| 24120 | 3.92553  | 0 | 0.254743 | 0 | 1 | 6 | FALSE | GPIHBP1   |
| 24123 | 3.92553  | 0 | 0.254743 | 0 | 1 | 6 | FALSE | GPR173    |
| 24125 | 3.92553  | 0 | 0.254743 | 0 | 1 | 6 | FALSE | GRK4      |
| 24127 | 3.92553  | 0 | 0.254743 | 0 | 1 | 6 | FALSE | HAL       |



|       |         |   |          |   |   |         |          |
|-------|---------|---|----------|---|---|---------|----------|
| 24131 | 3.92553 | 0 | 0.254743 | 0 | 1 | 6 FALSE | HLA-DRB5 |
| 24133 | 3.92553 | 0 | 0.254743 | 0 | 1 | 6 FALSE | HMGN2    |
| 24136 | 3.92553 | 0 | 0.254743 | 0 | 1 | 6 FALSE | HOXA3    |
| 24138 | 3.92553 | 0 | 0.254743 | 0 | 1 | 6 FALSE | HRK      |
| 24143 | 3.92553 | 0 | 0.254743 | 0 | 1 | 6 FALSE | IDH3A    |
| 24147 | 3.92553 | 0 | 0.254743 | 0 | 1 | 6 FALSE | IGLL5    |
| 24149 | 3.92553 | 0 | 0.254743 | 0 | 1 | 6 FALSE | ING4     |
| 24151 | 3.92553 | 0 | 0.254743 | 0 | 1 | 6 FALSE | KCND1    |
| 24153 | 3.92553 | 0 | 0.254743 | 0 | 1 | 6 FALSE | KCNH2    |
| 24155 | 3.92553 | 0 | 0.254743 | 0 | 1 | 6 FALSE | KCNK5    |
| 24158 | 3.92553 | 0 | 0.254743 | 0 | 1 | 6 FALSE | KDM5C    |
| 24164 | 3.92553 | 0 | 0.254743 | 0 | 1 | 6 FALSE | LCE1B    |
| 24169 | 3.92553 | 0 | 0.254743 | 0 | 1 | 6 FALSE | LRRC20   |
| 24177 | 3.92553 | 0 | 0.254743 | 0 | 1 | 6 FALSE | MAF      |
| 24180 | 3.92553 | 0 | 0.254743 | 0 | 1 | 6 FALSE | MAP7D1   |
| 24182 | 3.92553 | 0 | 0.254743 | 0 | 1 | 6 FALSE | MAPK13   |
| 24186 | 3.92553 | 0 | 0.254743 | 0 | 1 | 6 FALSE | MED7     |
| 24191 | 3.92553 | 0 | 0.254743 | 0 | 1 | 6 FALSE | MTHFSD   |
| 24193 | 3.92553 | 0 | 0.254743 | 0 | 1 | 6 FALSE | MTMR1    |
| 24195 | 3.92553 | 0 | 0.254743 | 0 | 1 | 6 FALSE | MYL12A   |
| 24197 | 3.92553 | 0 | 0.254743 | 0 | 1 | 6 FALSE | NAB2     |
| 24199 | 3.92553 | 0 | 0.254743 | 0 | 1 | 6 FALSE | NAT9     |
| 24201 | 3.92553 | 0 | 0.254743 | 0 | 1 | 6 FALSE | NCAPH    |
| 24211 | 3.92553 | 0 | 0.254743 | 0 | 1 | 6 FALSE | NUDCD2   |
| 24214 | 3.92553 | 0 | 0.254743 | 0 | 1 | 6 FALSE | NXN      |
| 24223 | 3.92553 | 0 | 0.254743 | 0 | 1 | 6 FALSE | PALD1    |
| 24225 | 3.92553 | 0 | 0.254743 | 0 | 1 | 6 FALSE | PANK4    |
| 24227 | 3.92553 | 0 | 0.254743 | 0 | 1 | 6 FALSE | PCBP1    |
| 24231 | 3.92553 | 0 | 0.254743 | 0 | 1 | 6 FALSE | PHC2     |
| 24234 | 3.92553 | 0 | 0.254743 | 0 | 1 | 6 FALSE | PIM2     |
| 24236 | 3.92553 | 0 | 0.254743 | 0 | 1 | 6 FALSE | PLXNA2   |
| 24241 | 3.92553 | 0 | 0.254743 | 0 | 1 | 6 FALSE | PRKCH    |
| 24245 | 3.92553 | 0 | 0.254743 | 0 | 1 | 6 FALSE | PTPA     |
| 24248 | 3.92553 | 0 | 0.254743 | 0 | 1 | 6 FALSE | PTPN6    |
| 24259 | 3.92553 | 0 | 0.254743 | 0 | 1 | 6 FALSE | REXO2    |
| 24262 | 3.92553 | 0 | 0.254743 | 0 | 1 | 6 FALSE | RPRM     |
| 24264 | 3.92553 | 0 | 0.254743 | 0 | 1 | 6 FALSE | SAMD10   |
| 24266 | 3.92553 | 0 | 0.254743 | 0 | 1 | 6 FALSE | SAMD14   |
| 24268 | 3.92553 | 0 | 0.254743 | 0 | 1 | 6 FALSE | SBNO1    |
| 24272 | 3.92553 | 0 | 0.254743 | 0 | 1 | 6 FALSE | SEMA3F   |
| 24277 | 3.92553 | 0 | 0.254743 | 0 | 1 | 6 FALSE | SETDB1   |
| 24279 | 3.92553 | 0 | 0.254743 | 0 | 1 | 6 FALSE | SFN      |
| 24281 | 3.92553 | 0 | 0.254743 | 0 | 1 | 6 FALSE | SHISA9   |
| 24284 | 3.92553 | 0 | 0.254743 | 0 | 1 | 6 FALSE | SIAH3    |
| 24290 | 3.92553 | 0 | 0.254743 | 0 | 1 | 6 FALSE | SLC2A1   |
| 24294 | 3.92553 | 0 | 0.254743 | 0 | 1 | 6 FALSE | SLF1     |
| 24297 | 3.92553 | 0 | 0.254743 | 0 | 1 | 6 FALSE | SND1     |

|       |          |          |          |   |     |   |       |       |            |
|-------|----------|----------|----------|---|-----|---|-------|-------|------------|
| 24302 | 3.92553  | 0        | 0.254743 | 0 | 1   | 6 | FALSE |       | SPATA6     |
| 24305 | 3.92553  | 0        | 0.254743 | 0 | 1   | 6 | FALSE |       | SPRY4      |
| 24310 | 3.92553  | 0        | 0.254743 | 0 | 1   | 6 | FALSE |       | SUMO1      |
| 24313 | 3.92553  | 0        | 0.254743 | 0 | 1   | 6 | FALSE |       | TAF12      |
| 24315 | 3.92553  | 0        | 0.254743 | 0 | 1   | 6 | FALSE |       | TAF7       |
| 24320 | 3.92553  | 0        | 0.254743 | 0 | 1   | 6 | FALSE |       | TJP3       |
| 24360 | 2.897327 | 0.056697 | 0.345146 | 0 | 270 | 3 | FALSE | miRNA | hsa-miR-6C |
| 24323 | 3.92553  | 0        | 0.254743 | 0 | 1   | 6 | FALSE |       | TMEM63A    |
| 24330 | 3.92553  | 0        | 0.254743 | 0 | 1   | 6 | FALSE |       | TPM2       |
| 24333 | 3.92553  | 0        | 0.254743 | 0 | 1   | 6 | FALSE |       | TRIB3      |
| 24335 | 3.92553  | 0        | 0.254743 | 0 | 1   | 6 | FALSE |       | TRIM56     |
| 24338 | 3.92553  | 0        | 0.254743 | 0 | 1   | 6 | FALSE |       | UBE2J1     |
| 24343 | 3.92553  | 0        | 0.254743 | 0 | 1   | 6 | FALSE |       | WNT8B      |
| 24354 | 3.92553  | 0        | 0.254743 | 0 | 1   | 6 | FALSE |       | ZNF34      |
| 24356 | 3.92553  | 0        | 0.254743 | 0 | 1   | 6 | FALSE |       | ZNF774     |
| 24358 | 3.92553  | 0        | 0.254743 | 0 | 1   | 6 | FALSE |       | ZNF84      |
| 24361 | 3.897143 | 0        | 0.256598 | 0 | 1   | 4 | FALSE |       | 14-Sep     |
| 24363 | 3.897143 | 0        | 0.256598 | 0 | 1   | 4 | FALSE |       | A2ML1      |
| 24367 | 3.897143 | 0        | 0.256598 | 0 | 1   | 4 | FALSE |       | ACOT2      |
| 24369 | 3.897143 | 0        | 0.256598 | 0 | 1   | 4 | FALSE |       | ADA2       |
| 24371 | 3.897143 | 0        | 0.256598 | 0 | 1   | 4 | FALSE |       | ADIPOQ     |
| 24373 | 3.897143 | 0        | 0.256598 | 0 | 1   | 4 | FALSE |       | ADSL       |
| 24377 | 3.897143 | 0        | 0.256598 | 0 | 1   | 4 | FALSE |       | AKT1S1     |
| 24384 | 3.897143 | 0        | 0.256598 | 0 | 1   | 4 | FALSE |       | ARHGAP39   |
| 24386 | 3.897143 | 0        | 0.256598 | 0 | 1   | 4 | FALSE |       | ARL5C      |
| 24389 | 3.897143 | 0        | 0.256598 | 0 | 1   | 4 | FALSE |       | ASPA       |
| 24393 | 3.897143 | 0        | 0.256598 | 0 | 1   | 4 | FALSE |       | BCAM       |
| 24397 | 3.897143 | 0        | 0.256598 | 0 | 1   | 4 | FALSE |       | BPNT1      |
| 24399 | 3.897143 | 0        | 0.256598 | 0 | 1   | 4 | FALSE |       | C10orf111  |
| 24403 | 3.897143 | 0        | 0.256598 | 0 | 1   | 4 | FALSE |       | C12orf49   |
| 24406 | 3.897143 | 0        | 0.256598 | 0 | 1   | 4 | FALSE |       | C1GALT1C:  |
| 24410 | 3.897143 | 0        | 0.256598 | 0 | 1   | 4 | FALSE |       | C9orf3     |
| 24412 | 3.897143 | 0        | 0.256598 | 0 | 1   | 4 | FALSE |       | CALML3     |
| 24415 | 3.897143 | 0        | 0.256598 | 0 | 1   | 4 | FALSE |       | CBY3       |
| 24421 | 3.897143 | 0        | 0.256598 | 0 | 1   | 4 | FALSE |       | CCR4       |
| 24426 | 3.897143 | 0        | 0.256598 | 0 | 1   | 4 | FALSE |       | CDH7       |
| 24434 | 3.897143 | 0        | 0.256598 | 0 | 1   | 4 | FALSE |       | CSTF2      |
| 24436 | 3.897143 | 0        | 0.256598 | 0 | 1   | 4 | FALSE |       | CTDNBP1    |
| 24439 | 3.897143 | 0        | 0.256598 | 0 | 1   | 4 | FALSE |       | DENND2C    |
| 24446 | 3.897143 | 0        | 0.256598 | 0 | 1   | 4 | FALSE |       | ECE1       |
| 24448 | 3.897143 | 0        | 0.256598 | 0 | 1   | 4 | FALSE |       | ECSIT      |
| 24450 | 3.897143 | 0        | 0.256598 | 0 | 1   | 4 | FALSE |       | EFCAB11    |
| 24452 | 3.897143 | 0        | 0.256598 | 0 | 1   | 4 | FALSE |       | ELFN2      |
| 24454 | 3.897143 | 0        | 0.256598 | 0 | 1   | 4 | FALSE |       | EMILIN2    |
| 24456 | 3.897143 | 0        | 0.256598 | 0 | 1   | 4 | FALSE |       | ESF1       |
| 24458 | 3.897143 | 0        | 0.256598 | 0 | 1   | 4 | FALSE |       | ETV7       |
| 24461 | 3.897143 | 0        | 0.256598 | 0 | 1   | 4 | FALSE |       | F2         |

|       |          |   |          |   |   |         |          |
|-------|----------|---|----------|---|---|---------|----------|
| 24463 | 3.897143 | 0 | 0.256598 | 0 | 1 | 4 FALSE | FAAH     |
| 24470 | 3.897143 | 0 | 0.256598 | 0 | 1 | 4 FALSE | FECH     |
| 24476 | 3.897143 | 0 | 0.256598 | 0 | 1 | 4 FALSE | GCK      |
| 24479 | 3.897143 | 0 | 0.256598 | 0 | 1 | 4 FALSE | GM2A     |
| 24482 | 3.897143 | 0 | 0.256598 | 0 | 1 | 4 FALSE | GNG4     |
| 24486 | 3.897143 | 0 | 0.256598 | 0 | 1 | 4 FALSE | GOLGA3   |
| 24488 | 3.897143 | 0 | 0.256598 | 0 | 1 | 4 FALSE | GPALPP1  |
| 24490 | 3.897143 | 0 | 0.256598 | 0 | 1 | 4 FALSE | GREM2    |
| 24492 | 3.897143 | 0 | 0.256598 | 0 | 1 | 4 FALSE | HASPIN   |
| 24494 | 3.897143 | 0 | 0.256598 | 0 | 1 | 4 FALSE | HAVCR1   |
| 24498 | 3.897143 | 0 | 0.256598 | 0 | 1 | 4 FALSE | HOMEZ    |
| 24501 | 3.897143 | 0 | 0.256598 | 0 | 1 | 4 FALSE | HOXD3    |
| 24503 | 3.897143 | 0 | 0.256598 | 0 | 1 | 4 FALSE | HRNR     |
| 24505 | 3.897143 | 0 | 0.256598 | 0 | 1 | 4 FALSE | IDE      |
| 24507 | 3.897143 | 0 | 0.256598 | 0 | 1 | 4 FALSE | IGF1     |
| 24509 | 3.897143 | 0 | 0.256598 | 0 | 1 | 4 FALSE | INAFM1   |
| 24512 | 3.897143 | 0 | 0.256598 | 0 | 1 | 4 FALSE | IRGQ     |
| 24514 | 3.897143 | 0 | 0.256598 | 0 | 1 | 4 FALSE | ITGAX    |
| 24516 | 3.897143 | 0 | 0.256598 | 0 | 1 | 4 FALSE | JAM2     |
| 24519 | 3.897143 | 0 | 0.256598 | 0 | 1 | 4 FALSE | KBTBD12  |
| 24521 | 3.897143 | 0 | 0.256598 | 0 | 1 | 4 FALSE | KIAA0513 |
| 24525 | 3.897143 | 0 | 0.256598 | 0 | 1 | 4 FALSE | KIFC2    |
| 24528 | 3.897143 | 0 | 0.256598 | 0 | 1 | 4 FALSE | KNL1     |
| 24530 | 3.897143 | 0 | 0.256598 | 0 | 1 | 4 FALSE | LBX1     |
| 24532 | 3.897143 | 0 | 0.256598 | 0 | 1 | 4 FALSE | LILRA5   |
| 24534 | 3.897143 | 0 | 0.256598 | 0 | 1 | 4 FALSE | LIPG     |
| 24540 | 3.897143 | 0 | 0.256598 | 0 | 1 | 4 FALSE | MALL     |
| 24542 | 3.897143 | 0 | 0.256598 | 0 | 1 | 4 FALSE | MAPKAPK5 |
| 24547 | 3.897143 | 0 | 0.256598 | 0 | 1 | 4 FALSE | MED16    |
| 24551 | 3.897143 | 0 | 0.256598 | 0 | 1 | 4 FALSE | MIER2    |
| 24556 | 3.897143 | 0 | 0.256598 | 0 | 1 | 4 FALSE | MRPS23   |
| 24565 | 3.897143 | 0 | 0.256598 | 0 | 1 | 4 FALSE | NMNAT1   |
| 24567 | 3.897143 | 0 | 0.256598 | 0 | 1 | 4 FALSE | NMUR1    |
| 24570 | 3.897143 | 0 | 0.256598 | 0 | 1 | 4 FALSE | NT5DC3   |
| 24573 | 3.897143 | 0 | 0.256598 | 0 | 1 | 4 FALSE | OGFRL1   |
| 24577 | 3.897143 | 0 | 0.256598 | 0 | 1 | 4 FALSE | PACSIN1  |
| 24579 | 3.897143 | 0 | 0.256598 | 0 | 1 | 4 FALSE | PAOX     |
| 24581 | 3.897143 | 0 | 0.256598 | 0 | 1 | 4 FALSE | PCDHB11  |
| 24584 | 3.897143 | 0 | 0.256598 | 0 | 1 | 4 FALSE | PDE4C    |
| 24586 | 3.897143 | 0 | 0.256598 | 0 | 1 | 4 FALSE | PDE6B    |
| 24591 | 3.897143 | 0 | 0.256598 | 0 | 1 | 4 FALSE | PEAK3    |
| 24594 | 3.897143 | 0 | 0.256598 | 0 | 1 | 4 FALSE | PHF7     |
| 24596 | 3.897143 | 0 | 0.256598 | 0 | 1 | 4 FALSE | PHYHIP   |
| 24598 | 3.897143 | 0 | 0.256598 | 0 | 1 | 4 FALSE | PIGO     |
| 24601 | 3.897143 | 0 | 0.256598 | 0 | 1 | 4 FALSE | PLAA     |
| 24603 | 3.897143 | 0 | 0.256598 | 0 | 1 | 4 FALSE | PLD6     |
| 24605 | 3.897143 | 0 | 0.256598 | 0 | 1 | 4 FALSE | PLEKHG3  |

|       |          |   |          |   |   |         |         |
|-------|----------|---|----------|---|---|---------|---------|
| 24608 | 3.897143 | 0 | 0.256598 | 0 | 1 | 4 FALSE | POU3F3  |
| 24610 | 3.897143 | 0 | 0.256598 | 0 | 1 | 4 FALSE | PPFIBP1 |
| 24612 | 3.897143 | 0 | 0.256598 | 0 | 1 | 4 FALSE | PPP1R3G |
| 24615 | 3.897143 | 0 | 0.256598 | 0 | 1 | 4 FALSE | PRPS1L1 |
| 24617 | 3.897143 | 0 | 0.256598 | 0 | 1 | 4 FALSE | PRR13   |
| 24619 | 3.897143 | 0 | 0.256598 | 0 | 1 | 4 FALSE | PSMG1   |
| 24623 | 3.897143 | 0 | 0.256598 | 0 | 1 | 4 FALSE | PTGR2   |
| 24628 | 3.897143 | 0 | 0.256598 | 0 | 1 | 4 FALSE | RBM28   |
| 24631 | 3.897143 | 0 | 0.256598 | 0 | 1 | 4 FALSE | RBM4B   |
| 24633 | 3.897143 | 0 | 0.256598 | 0 | 1 | 4 FALSE | RBMS2   |
| 24640 | 3.897143 | 0 | 0.256598 | 0 | 1 | 4 FALSE | RNF149  |
| 24642 | 3.897143 | 0 | 0.256598 | 0 | 1 | 4 FALSE | RNF20   |
| 24644 | 3.897143 | 0 | 0.256598 | 0 | 1 | 4 FALSE | RPH3AL  |
| 24648 | 3.897143 | 0 | 0.256598 | 0 | 1 | 4 FALSE | RTCA    |
| 24650 | 3.897143 | 0 | 0.256598 | 0 | 1 | 4 FALSE | S100A16 |
| 24653 | 3.897143 | 0 | 0.256598 | 0 | 1 | 4 FALSE | SCD5    |
| 24655 | 3.897143 | 0 | 0.256598 | 0 | 1 | 4 FALSE | SCO1    |
| 24657 | 3.897143 | 0 | 0.256598 | 0 | 1 | 4 FALSE | SCUBE3  |
| 24661 | 3.897143 | 0 | 0.256598 | 0 | 1 | 4 FALSE | SIPA1   |
| 24663 | 3.897143 | 0 | 0.256598 | 0 | 1 | 4 FALSE | SIRT3   |
| 24666 | 3.897143 | 0 | 0.256598 | 0 | 1 | 4 FALSE | SLC29A4 |
| 24670 | 3.897143 | 0 | 0.256598 | 0 | 1 | 4 FALSE | SMC5    |
| 24672 | 3.897143 | 0 | 0.256598 | 0 | 1 | 4 FALSE | SNAP23  |
| 24676 | 3.897143 | 0 | 0.256598 | 0 | 1 | 4 FALSE | SPRED1  |
| 24678 | 3.897143 | 0 | 0.256598 | 0 | 1 | 4 FALSE | SRPRA   |
| 24683 | 3.897143 | 0 | 0.256598 | 0 | 1 | 4 FALSE | SUGT1   |
| 24685 | 3.897143 | 0 | 0.256598 | 0 | 1 | 4 FALSE | SUSD1   |
| 24687 | 3.897143 | 0 | 0.256598 | 0 | 1 | 4 FALSE | SYAP1   |
| 24690 | 3.897143 | 0 | 0.256598 | 0 | 1 | 4 FALSE | TBC1D19 |
| 24693 | 3.897143 | 0 | 0.256598 | 0 | 1 | 4 FALSE | TCF23   |
| 24695 | 3.897143 | 0 | 0.256598 | 0 | 1 | 4 FALSE | TGS1    |
| 24697 | 3.897143 | 0 | 0.256598 | 0 | 1 | 4 FALSE | THSD4   |
| 24699 | 3.897143 | 0 | 0.256598 | 0 | 1 | 4 FALSE | TIAL1   |
| 24701 | 3.897143 | 0 | 0.256598 | 0 | 1 | 4 FALSE | TLN2    |
| 24706 | 3.897143 | 0 | 0.256598 | 0 | 1 | 4 FALSE | TMEM44  |
| 24710 | 3.897143 | 0 | 0.256598 | 0 | 1 | 4 FALSE | TNFSF15 |
| 24712 | 3.897143 | 0 | 0.256598 | 0 | 1 | 4 FALSE | TNNI1   |
| 24717 | 3.897143 | 0 | 0.256598 | 0 | 1 | 4 FALSE | TRIM72  |
| 24719 | 3.897143 | 0 | 0.256598 | 0 | 1 | 4 FALSE | TRUB2   |
| 24723 | 3.897143 | 0 | 0.256598 | 0 | 1 | 4 FALSE | TTL1    |
| 24727 | 3.897143 | 0 | 0.256598 | 0 | 1 | 4 FALSE | TYRO3   |
| 24729 | 3.897143 | 0 | 0.256598 | 0 | 1 | 4 FALSE | UQCRCQ  |
| 24731 | 3.897143 | 0 | 0.256598 | 0 | 1 | 4 FALSE | USP1    |
| 24733 | 3.897143 | 0 | 0.256598 | 0 | 1 | 4 FALSE | VENTX   |
| 24737 | 3.897143 | 0 | 0.256598 | 0 | 1 | 4 FALSE | VPS8    |
| 24745 | 3.897143 | 0 | 0.256598 | 0 | 1 | 4 FALSE | ZNF141  |
| 24747 | 3.897143 | 0 | 0.256598 | 0 | 1 | 4 FALSE | ZNF280C |

|       |          |          |          |   |     |   |       |       |            |
|-------|----------|----------|----------|---|-----|---|-------|-------|------------|
| 24749 | 3.897143 | 0        | 0.256598 | 0 | 1   | 4 | FALSE |       | ZNF35      |
| 24751 | 3.897143 | 0        | 0.256598 | 0 | 1   | 4 | FALSE |       | ZNF394     |
| 24767 | 3.014562 | 0.013459 | 0.331723 | 0 | 97  | 5 | FALSE | miRNA | hsa-miR-67 |
| 24754 | 3.897143 | 0        | 0.256598 | 0 | 1   | 4 | FALSE |       | ZNF548     |
| 24760 | 3.897143 | 0        | 0.256598 | 0 | 1   | 4 | FALSE |       | ZNF713     |
| 24762 | 3.897143 | 0        | 0.256598 | 0 | 1   | 4 | FALSE |       | ZNF788     |
| 24764 | 3.897143 | 0        | 0.256598 | 0 | 1   | 4 | FALSE |       | ZNF790     |
| 24768 | 4.014378 | 0        | 0.249105 | 0 | 1   | 6 | FALSE |       | ADAMTS7    |
| 24777 | 4.014378 | 0        | 0.249105 | 0 | 1   | 6 | FALSE |       | CASC3      |
| 24791 | 4.014378 | 0        | 0.249105 | 0 | 1   | 6 | FALSE |       | DDX39A     |
| 24794 | 4.014378 | 0        | 0.249105 | 0 | 1   | 6 | FALSE |       | DGKZ       |
| 24796 | 4.014378 | 0        | 0.249105 | 0 | 1   | 6 | FALSE |       | DIS3L      |
| 24804 | 4.014378 | 0        | 0.249105 | 0 | 1   | 6 | FALSE |       | FAM208A    |
| 24807 | 4.014378 | 0        | 0.249105 | 0 | 1   | 6 | FALSE |       | FTO        |
| 24814 | 4.014378 | 0        | 0.249105 | 0 | 1   | 6 | FALSE |       | GRB2       |
| 24816 | 4.014378 | 0        | 0.249105 | 0 | 1   | 6 | FALSE |       | GSG2       |
| 24821 | 4.014378 | 0        | 0.249105 | 0 | 1   | 6 | FALSE |       | HUS1       |
| 24833 | 4.014378 | 0        | 0.249105 | 0 | 1   | 6 | FALSE |       | MAN1B1     |
| 24835 | 4.014378 | 0        | 0.249105 | 0 | 1   | 6 | FALSE |       | MLXIP      |
| 24839 | 4.014378 | 0        | 0.249105 | 0 | 1   | 6 | FALSE |       | MYSM1      |
| 24841 | 4.014378 | 0        | 0.249105 | 0 | 1   | 6 | FALSE |       | NCEH1      |
| 24843 | 4.014378 | 0        | 0.249105 | 0 | 1   | 6 | FALSE |       | NHS        |
| 24845 | 4.014378 | 0        | 0.249105 | 0 | 1   | 6 | FALSE |       | NIFK       |
| 24847 | 4.014378 | 0        | 0.249105 | 0 | 1   | 6 | FALSE |       | NIN        |
| 24849 | 4.014378 | 0        | 0.249105 | 0 | 1   | 6 | FALSE |       | PATZ1      |
| 24851 | 4.014378 | 0        | 0.249105 | 0 | 1   | 6 | FALSE |       | PIP5K1A    |
| 24853 | 4.014378 | 0        | 0.249105 | 0 | 1   | 6 | FALSE |       | PLEKHA6    |
| 24857 | 4.014378 | 0        | 0.249105 | 0 | 1   | 6 | FALSE |       | PRMT1      |
| 24860 | 4.014378 | 0        | 0.249105 | 0 | 1   | 6 | FALSE |       | PTPRD      |
| 24863 | 4.014378 | 0        | 0.249105 | 0 | 1   | 6 | FALSE |       | PVR        |
| 24865 | 4.014378 | 0        | 0.249105 | 0 | 1   | 6 | FALSE |       | RASGRF1    |
| 24870 | 4.014378 | 0        | 0.249105 | 0 | 1   | 6 | FALSE |       | S100A6     |
| 24873 | 4.014378 | 0        | 0.249105 | 0 | 1   | 6 | FALSE |       | SEMA5A     |
| 24877 | 4.014378 | 0        | 0.249105 | 0 | 1   | 6 | FALSE |       | SORCS2     |
| 24881 | 4.014378 | 0        | 0.249105 | 0 | 1   | 6 | FALSE |       | TMEM223    |
| 24886 | 4.014378 | 0        | 0.249105 | 0 | 1   | 6 | FALSE |       | TRAF2      |
| 24891 | 4.014378 | 0        | 0.249105 | 0 | 1   | 6 | FALSE |       | USP24      |
| 24893 | 4.014378 | 0        | 0.249105 | 0 | 1   | 6 | FALSE |       | UTP18      |
| 24899 | 4.014378 | 0        | 0.249105 | 0 | 1   | 6 | FALSE |       | ZFC3H1     |
| 24901 | 2.730691 | 0.152236 | 0.366208 | 0 | 722 | 3 | FALSE | miRNA | hsa-miR-67 |
| 24904 | 3.730507 | 0        | 0.26806  | 0 | 1   | 4 | FALSE |       | 6-Mar      |
| 24907 | 3.730507 | 0        | 0.26806  | 0 | 1   | 4 | FALSE |       | ABHD14A-1  |
| 24914 | 3.730507 | 0        | 0.26806  | 0 | 1   | 4 | FALSE |       | ACY1       |
| 24917 | 3.730507 | 0        | 0.26806  | 0 | 1   | 4 | FALSE |       | ADAM11     |
| 24919 | 3.730507 | 0        | 0.26806  | 0 | 1   | 4 | FALSE |       | ADAMTS5    |
| 24921 | 3.730507 | 0        | 0.26806  | 0 | 1   | 4 | FALSE |       | ADCY1      |
| 24923 | 3.730507 | 0        | 0.26806  | 0 | 1   | 4 | FALSE |       | ADCY6      |

|       |          |   |         |   |   |         |           |
|-------|----------|---|---------|---|---|---------|-----------|
| 24926 | 3.730507 | 0 | 0.26806 | 0 | 1 | 4 FALSE | AGFG2     |
| 24935 | 3.730507 | 0 | 0.26806 | 0 | 1 | 4 FALSE | AMOT      |
| 24937 | 3.730507 | 0 | 0.26806 | 0 | 1 | 4 FALSE | ANGEL1    |
| 24943 | 3.730507 | 0 | 0.26806 | 0 | 1 | 4 FALSE | ANXA6     |
| 24946 | 3.730507 | 0 | 0.26806 | 0 | 1 | 4 FALSE | APH1B     |
| 24948 | 3.730507 | 0 | 0.26806 | 0 | 1 | 4 FALSE | ARFIP1    |
| 24952 | 3.730507 | 0 | 0.26806 | 0 | 1 | 4 FALSE | ARL6IP4   |
| 24957 | 3.730507 | 0 | 0.26806 | 0 | 1 | 4 FALSE | ARV1      |
| 24959 | 3.730507 | 0 | 0.26806 | 0 | 1 | 4 FALSE | ASAH2     |
| 24963 | 3.730507 | 0 | 0.26806 | 0 | 1 | 4 FALSE | ASF1B     |
| 24965 | 3.730507 | 0 | 0.26806 | 0 | 1 | 4 FALSE | ATAD2     |
| 24969 | 3.730507 | 0 | 0.26806 | 0 | 1 | 4 FALSE | ATN1      |
| 24972 | 3.730507 | 0 | 0.26806 | 0 | 1 | 4 FALSE | ATP1B3    |
| 24976 | 3.730507 | 0 | 0.26806 | 0 | 1 | 4 FALSE | ATP5S     |
| 24978 | 3.730507 | 0 | 0.26806 | 0 | 1 | 4 FALSE | ATP6AP1   |
| 24982 | 3.730507 | 0 | 0.26806 | 0 | 1 | 4 FALSE | ATP6V1C1  |
| 24985 | 3.730507 | 0 | 0.26806 | 0 | 1 | 4 FALSE | AUP1      |
| 24987 | 3.730507 | 0 | 0.26806 | 0 | 1 | 4 FALSE | AURKA     |
| 24989 | 3.730507 | 0 | 0.26806 | 0 | 1 | 4 FALSE | B4GALNT4  |
| 24995 | 3.730507 | 0 | 0.26806 | 0 | 1 | 4 FALSE | BCAP31    |
| 24998 | 3.730507 | 0 | 0.26806 | 0 | 1 | 4 FALSE | BCL2L2-PA |
| 25001 | 3.730507 | 0 | 0.26806 | 0 | 1 | 4 FALSE | BCR       |
| 25003 | 3.730507 | 0 | 0.26806 | 0 | 1 | 4 FALSE | BET1      |
| 25007 | 3.730507 | 0 | 0.26806 | 0 | 1 | 4 FALSE | BMP10     |
| 25010 | 3.730507 | 0 | 0.26806 | 0 | 1 | 4 FALSE | BMP8A     |
| 25014 | 3.730507 | 0 | 0.26806 | 0 | 1 | 4 FALSE | BSDC1     |
| 25016 | 3.730507 | 0 | 0.26806 | 0 | 1 | 4 FALSE | BTBD16    |
| 25022 | 3.730507 | 0 | 0.26806 | 0 | 1 | 4 FALSE | C11orf24  |
| 25026 | 3.730507 | 0 | 0.26806 | 0 | 1 | 4 FALSE | C17orf58  |
| 25028 | 3.730507 | 0 | 0.26806 | 0 | 1 | 4 FALSE | C17orf67  |
| 25032 | 3.730507 | 0 | 0.26806 | 0 | 1 | 4 FALSE | C1orf85   |
| 25034 | 3.730507 | 0 | 0.26806 | 0 | 1 | 4 FALSE | C1QTNF1   |
| 25039 | 3.730507 | 0 | 0.26806 | 0 | 1 | 4 FALSE | C8orf58   |
| 25041 | 3.730507 | 0 | 0.26806 | 0 | 1 | 4 FALSE | C8orf82   |
| 25054 | 3.730507 | 0 | 0.26806 | 0 | 1 | 4 FALSE | CCDC58    |
| 25057 | 3.730507 | 0 | 0.26806 | 0 | 1 | 4 FALSE | CCHCR1    |
| 25062 | 3.730507 | 0 | 0.26806 | 0 | 1 | 4 FALSE | CCT3      |
| 25068 | 3.730507 | 0 | 0.26806 | 0 | 1 | 4 FALSE | CDC6      |
| 25070 | 3.730507 | 0 | 0.26806 | 0 | 1 | 4 FALSE | CDCA7L    |
| 25073 | 3.730507 | 0 | 0.26806 | 0 | 1 | 4 FALSE | CDH13     |
| 25076 | 3.730507 | 0 | 0.26806 | 0 | 1 | 4 FALSE | CDK2AP2   |
| 25080 | 3.730507 | 0 | 0.26806 | 0 | 1 | 4 FALSE | CDKN2A    |
| 25084 | 3.730507 | 0 | 0.26806 | 0 | 1 | 4 FALSE | CENPT     |
| 25086 | 3.730507 | 0 | 0.26806 | 0 | 1 | 4 FALSE | CEP120    |
| 25088 | 3.730507 | 0 | 0.26806 | 0 | 1 | 4 FALSE | CEP128    |
| 25090 | 3.730507 | 0 | 0.26806 | 0 | 1 | 4 FALSE | CEP85     |
| 25093 | 3.730507 | 0 | 0.26806 | 0 | 1 | 4 FALSE | CHCHD2    |

|       |          |   |         |   |   |         |           |
|-------|----------|---|---------|---|---|---------|-----------|
| 25098 | 3.730507 | 0 | 0.26806 | 0 | 1 | 4 FALSE | CHTF18    |
| 25100 | 3.730507 | 0 | 0.26806 | 0 | 1 | 4 FALSE | CLNS1A    |
| 25102 | 3.730507 | 0 | 0.26806 | 0 | 1 | 4 FALSE | CLPTM1    |
| 25105 | 3.730507 | 0 | 0.26806 | 0 | 1 | 4 FALSE | COA4      |
| 25107 | 3.730507 | 0 | 0.26806 | 0 | 1 | 4 FALSE | COG4      |
| 25113 | 3.730507 | 0 | 0.26806 | 0 | 1 | 4 FALSE | COL8A2    |
| 25118 | 3.730507 | 0 | 0.26806 | 0 | 1 | 4 FALSE | CPNE2     |
| 25121 | 3.730507 | 0 | 0.26806 | 0 | 1 | 4 FALSE | CREG1     |
| 25125 | 3.730507 | 0 | 0.26806 | 0 | 1 | 4 FALSE | CSK       |
| 25128 | 3.730507 | 0 | 0.26806 | 0 | 1 | 4 FALSE | CTDSP2    |
| 25131 | 3.730507 | 0 | 0.26806 | 0 | 1 | 4 FALSE | CTSD      |
| 25133 | 3.730507 | 0 | 0.26806 | 0 | 1 | 4 FALSE | CUL3      |
| 25136 | 3.730507 | 0 | 0.26806 | 0 | 1 | 4 FALSE | CYP46A1   |
| 25139 | 3.730507 | 0 | 0.26806 | 0 | 1 | 4 FALSE | CYTH2     |
| 25141 | 3.730507 | 0 | 0.26806 | 0 | 1 | 4 FALSE | DAZAP1    |
| 25143 | 3.730507 | 0 | 0.26806 | 0 | 1 | 4 FALSE | DCAF17    |
| 25146 | 3.730507 | 0 | 0.26806 | 0 | 1 | 4 FALSE | DDHD2     |
| 25152 | 3.730507 | 0 | 0.26806 | 0 | 1 | 4 FALSE | DDX24     |
| 25158 | 3.730507 | 0 | 0.26806 | 0 | 1 | 4 FALSE | DHCR24    |
| 25162 | 3.730507 | 0 | 0.26806 | 0 | 1 | 4 FALSE | DLX5      |
| 25165 | 3.730507 | 0 | 0.26806 | 0 | 1 | 4 FALSE | DNAJB9    |
| 25167 | 3.730507 | 0 | 0.26806 | 0 | 1 | 4 FALSE | DNAJC11   |
| 25169 | 3.730507 | 0 | 0.26806 | 0 | 1 | 4 FALSE | DNAJC13   |
| 25173 | 3.730507 | 0 | 0.26806 | 0 | 1 | 4 FALSE | DPP9      |
| 25175 | 3.730507 | 0 | 0.26806 | 0 | 1 | 4 FALSE | DSG2      |
| 25177 | 3.730507 | 0 | 0.26806 | 0 | 1 | 4 FALSE | DSTN      |
| 25184 | 3.730507 | 0 | 0.26806 | 0 | 1 | 4 FALSE | EFHD2     |
| 25186 | 3.730507 | 0 | 0.26806 | 0 | 1 | 4 FALSE | EGR1      |
| 25188 | 3.730507 | 0 | 0.26806 | 0 | 1 | 4 FALSE | EIF2S2    |
| 25190 | 3.730507 | 0 | 0.26806 | 0 | 1 | 4 FALSE | EIF3D     |
| 25198 | 3.730507 | 0 | 0.26806 | 0 | 1 | 4 FALSE | EMX1      |
| 25204 | 3.730507 | 0 | 0.26806 | 0 | 1 | 4 FALSE | EPHX4     |
| 25206 | 3.730507 | 0 | 0.26806 | 0 | 1 | 4 FALSE | EPT1      |
| 25208 | 3.730507 | 0 | 0.26806 | 0 | 1 | 4 FALSE | ERCC6     |
| 25212 | 3.730507 | 0 | 0.26806 | 0 | 1 | 4 FALSE | ERP29     |
| 25216 | 3.730507 | 0 | 0.26806 | 0 | 1 | 4 FALSE | FAM47E-S1 |
| 25220 | 3.730507 | 0 | 0.26806 | 0 | 1 | 4 FALSE | FARSB     |
| 25223 | 3.730507 | 0 | 0.26806 | 0 | 1 | 4 FALSE | FBLN1     |
| 25228 | 3.730507 | 0 | 0.26806 | 0 | 1 | 4 FALSE | FBXO36    |
| 25231 | 3.730507 | 0 | 0.26806 | 0 | 1 | 4 FALSE | FGF19     |
| 25244 | 3.730507 | 0 | 0.26806 | 0 | 1 | 4 FALSE | FUT8      |
| 25252 | 3.730507 | 0 | 0.26806 | 0 | 1 | 4 FALSE | GFM1      |
| 25259 | 3.730507 | 0 | 0.26806 | 0 | 1 | 4 FALSE | GOLIM4    |
| 25261 | 3.730507 | 0 | 0.26806 | 0 | 1 | 4 FALSE | GOLPH3L   |
| 25263 | 3.730507 | 0 | 0.26806 | 0 | 1 | 4 FALSE | GON4L     |
| 25265 | 3.730507 | 0 | 0.26806 | 0 | 1 | 4 FALSE | GPATCH2   |
| 25268 | 3.730507 | 0 | 0.26806 | 0 | 1 | 4 FALSE | GPI       |

|       |          |   |         |   |   |         |           |
|-------|----------|---|---------|---|---|---------|-----------|
| 25270 | 3.730507 | 0 | 0.26806 | 0 | 1 | 4 FALSE | GPR107    |
| 25273 | 3.730507 | 0 | 0.26806 | 0 | 1 | 4 FALSE | GRHL1     |
| 25276 | 3.730507 | 0 | 0.26806 | 0 | 1 | 4 FALSE | GRPR      |
| 25278 | 3.730507 | 0 | 0.26806 | 0 | 1 | 4 FALSE | GRWD1     |
| 25281 | 3.730507 | 0 | 0.26806 | 0 | 1 | 4 FALSE | GTPBP2    |
| 25283 | 3.730507 | 0 | 0.26806 | 0 | 1 | 4 FALSE | GYS1      |
| 25286 | 3.730507 | 0 | 0.26806 | 0 | 1 | 4 FALSE | HCN2      |
| 25288 | 3.730507 | 0 | 0.26806 | 0 | 1 | 4 FALSE | HDAC1     |
| 25294 | 3.730507 | 0 | 0.26806 | 0 | 1 | 4 FALSE | HIST1H3B  |
| 25296 | 3.730507 | 0 | 0.26806 | 0 | 1 | 4 FALSE | HIST1H3J  |
| 25298 | 3.730507 | 0 | 0.26806 | 0 | 1 | 4 FALSE | HIST2H2AA |
| 25300 | 3.730507 | 0 | 0.26806 | 0 | 1 | 4 FALSE | HJURP     |
| 25303 | 3.730507 | 0 | 0.26806 | 0 | 1 | 4 FALSE | HNRNPL    |
| 25307 | 3.730507 | 0 | 0.26806 | 0 | 1 | 4 FALSE | HOXB5     |
| 25309 | 3.730507 | 0 | 0.26806 | 0 | 1 | 4 FALSE | HOXD9     |
| 25312 | 3.730507 | 0 | 0.26806 | 0 | 1 | 4 FALSE | HRH2      |
| 25316 | 3.730507 | 0 | 0.26806 | 0 | 1 | 4 FALSE | HSPB8     |
| 25318 | 3.730507 | 0 | 0.26806 | 0 | 1 | 4 FALSE | IAH1      |
| 25320 | 3.730507 | 0 | 0.26806 | 0 | 1 | 4 FALSE | IARS2     |
| 25322 | 3.730507 | 0 | 0.26806 | 0 | 1 | 4 FALSE | ICMT      |
| 25324 | 3.730507 | 0 | 0.26806 | 0 | 1 | 4 FALSE | ICOSLG    |
| 25332 | 3.730507 | 0 | 0.26806 | 0 | 1 | 4 FALSE | IGSF8     |
| 25334 | 3.730507 | 0 | 0.26806 | 0 | 1 | 4 FALSE | IKZF2     |
| 25337 | 3.730507 | 0 | 0.26806 | 0 | 1 | 4 FALSE | IL15RA    |
| 25343 | 3.730507 | 0 | 0.26806 | 0 | 1 | 4 FALSE | INSR      |
| 25347 | 3.730507 | 0 | 0.26806 | 0 | 1 | 4 FALSE | IST1      |
| 25350 | 3.730507 | 0 | 0.26806 | 0 | 1 | 4 FALSE | ISYNA1    |
| 25353 | 3.730507 | 0 | 0.26806 | 0 | 1 | 4 FALSE | JKAMP     |
| 25355 | 3.730507 | 0 | 0.26806 | 0 | 1 | 4 FALSE | JRK       |
| 25357 | 3.730507 | 0 | 0.26806 | 0 | 1 | 4 FALSE | KHDRBS3   |
| 25360 | 3.730507 | 0 | 0.26806 | 0 | 1 | 4 FALSE | KIAA1045  |
| 25362 | 3.730507 | 0 | 0.26806 | 0 | 1 | 4 FALSE | KIF6      |
| 25364 | 3.730507 | 0 | 0.26806 | 0 | 1 | 4 FALSE | KLHL18    |
| 25366 | 3.730507 | 0 | 0.26806 | 0 | 1 | 4 FALSE | KLHL21    |
| 25368 | 3.730507 | 0 | 0.26806 | 0 | 1 | 4 FALSE | KLHL7     |
| 25372 | 3.730507 | 0 | 0.26806 | 0 | 1 | 4 FALSE | KPNB1     |
| 25376 | 3.730507 | 0 | 0.26806 | 0 | 1 | 4 FALSE | LANCL1    |
| 25378 | 3.730507 | 0 | 0.26806 | 0 | 1 | 4 FALSE | LASP1     |
| 25381 | 3.730507 | 0 | 0.26806 | 0 | 1 | 4 FALSE | LCMT2     |
| 25391 | 3.730507 | 0 | 0.26806 | 0 | 1 | 4 FALSE | LMAN2L    |
| 25394 | 3.730507 | 0 | 0.26806 | 0 | 1 | 4 FALSE | LRPAP1    |
| 25397 | 3.730507 | 0 | 0.26806 | 0 | 1 | 4 FALSE | LRRN2     |
| 25403 | 3.730507 | 0 | 0.26806 | 0 | 1 | 4 FALSE | LYSMD1    |
| 25407 | 3.730507 | 0 | 0.26806 | 0 | 1 | 4 FALSE | MAFG      |
| 25410 | 3.730507 | 0 | 0.26806 | 0 | 1 | 4 FALSE | MAOB      |
| 25414 | 3.730507 | 0 | 0.26806 | 0 | 1 | 4 FALSE | MARS      |
| 25416 | 3.730507 | 0 | 0.26806 | 0 | 1 | 4 FALSE | MARVELD1  |



|       |          |   |         |   |   |         |          |
|-------|----------|---|---------|---|---|---------|----------|
| 25424 | 3.730507 | 0 | 0.26806 | 0 | 1 | 4 FALSE | MELTF    |
| 25426 | 3.730507 | 0 | 0.26806 | 0 | 1 | 4 FALSE | MEPCE    |
| 25428 | 3.730507 | 0 | 0.26806 | 0 | 1 | 4 FALSE | METTTL23 |
| 25433 | 3.730507 | 0 | 0.26806 | 0 | 1 | 4 FALSE | MKKS     |
| 25437 | 3.730507 | 0 | 0.26806 | 0 | 1 | 4 FALSE | MOSPD3   |
| 25440 | 3.730507 | 0 | 0.26806 | 0 | 1 | 4 FALSE | MRM1     |
| 25442 | 3.730507 | 0 | 0.26806 | 0 | 1 | 4 FALSE | MRPS34   |
| 25444 | 3.730507 | 0 | 0.26806 | 0 | 1 | 4 FALSE | MS4A1    |
| 25446 | 3.730507 | 0 | 0.26806 | 0 | 1 | 4 FALSE | MSL1     |
| 25453 | 3.730507 | 0 | 0.26806 | 0 | 1 | 4 FALSE | NBEAL2   |
| 25455 | 3.730507 | 0 | 0.26806 | 0 | 1 | 4 FALSE | NCLN     |
| 25457 | 3.730507 | 0 | 0.26806 | 0 | 1 | 4 FALSE | NCS1     |
| 25459 | 3.730507 | 0 | 0.26806 | 0 | 1 | 4 FALSE | NDOR1    |
| 25461 | 3.730507 | 0 | 0.26806 | 0 | 1 | 4 FALSE | NDUFA10  |
| 25463 | 3.730507 | 0 | 0.26806 | 0 | 1 | 4 FALSE | NDUFA3   |
| 25465 | 3.730507 | 0 | 0.26806 | 0 | 1 | 4 FALSE | NDUFAB3  |
| 25467 | 3.730507 | 0 | 0.26806 | 0 | 1 | 4 FALSE | NEDD8    |
| 25470 | 3.730507 | 0 | 0.26806 | 0 | 1 | 4 FALSE | NEO1     |
| 25472 | 3.730507 | 0 | 0.26806 | 0 | 1 | 4 FALSE | NES      |
| 25474 | 3.730507 | 0 | 0.26806 | 0 | 1 | 4 FALSE | NET1     |
| 25480 | 3.730507 | 0 | 0.26806 | 0 | 1 | 4 FALSE | NIF3L1   |
| 25486 | 3.730507 | 0 | 0.26806 | 0 | 1 | 4 FALSE | NR4A3    |
| 25489 | 3.730507 | 0 | 0.26806 | 0 | 1 | 4 FALSE | NRSN2    |
| 25491 | 3.730507 | 0 | 0.26806 | 0 | 1 | 4 FALSE | NSF      |
| 25493 | 3.730507 | 0 | 0.26806 | 0 | 1 | 4 FALSE | NSUN5    |
| 25499 | 3.730507 | 0 | 0.26806 | 0 | 1 | 4 FALSE | ODC1     |
| 25501 | 3.730507 | 0 | 0.26806 | 0 | 1 | 4 FALSE | OGDH     |
| 25504 | 3.730507 | 0 | 0.26806 | 0 | 1 | 4 FALSE | ONECUT2  |
| 25506 | 3.730507 | 0 | 0.26806 | 0 | 1 | 4 FALSE | OPA1     |
| 25508 | 3.730507 | 0 | 0.26806 | 0 | 1 | 4 FALSE | OR2D2    |
| 25510 | 3.730507 | 0 | 0.26806 | 0 | 1 | 4 FALSE | OSBP     |
| 25518 | 3.730507 | 0 | 0.26806 | 0 | 1 | 4 FALSE | PAX1     |
| 25520 | 3.730507 | 0 | 0.26806 | 0 | 1 | 4 FALSE | PCF11    |
| 25522 | 3.730507 | 0 | 0.26806 | 0 | 1 | 4 FALSE | PCNXL4   |
| 25528 | 3.730507 | 0 | 0.26806 | 0 | 1 | 4 FALSE | PFDN5    |
| 25531 | 3.730507 | 0 | 0.26806 | 0 | 1 | 4 FALSE | PHF10    |
| 25534 | 3.730507 | 0 | 0.26806 | 0 | 1 | 4 FALSE | PHYKPL   |
| 25536 | 3.730507 | 0 | 0.26806 | 0 | 1 | 4 FALSE | PIEZO1   |
| 25539 | 3.730507 | 0 | 0.26806 | 0 | 1 | 4 FALSE | PIP4K2C  |
| 25541 | 3.730507 | 0 | 0.26806 | 0 | 1 | 4 FALSE | PITHD1   |
| 25543 | 3.730507 | 0 | 0.26806 | 0 | 1 | 4 FALSE | PITPNA   |
| 25545 | 3.730507 | 0 | 0.26806 | 0 | 1 | 4 FALSE | PKNOX2   |
| 25547 | 3.730507 | 0 | 0.26806 | 0 | 1 | 4 FALSE | PKP3     |
| 25551 | 3.730507 | 0 | 0.26806 | 0 | 1 | 4 FALSE | PLD1     |
| 25555 | 3.730507 | 0 | 0.26806 | 0 | 1 | 4 FALSE | POLD1    |
| 25560 | 3.730507 | 0 | 0.26806 | 0 | 1 | 4 FALSE | POR      |
| 25562 | 3.730507 | 0 | 0.26806 | 0 | 1 | 4 FALSE | PPIF     |

|       |          |   |         |   |   |         |           |
|-------|----------|---|---------|---|---|---------|-----------|
| 25565 | 3.730507 | 0 | 0.26806 | 0 | 1 | 4 FALSE | PPP1R12C  |
| 25567 | 3.730507 | 0 | 0.26806 | 0 | 1 | 4 FALSE | PPP1R18   |
| 25575 | 3.730507 | 0 | 0.26806 | 0 | 1 | 4 FALSE | PRKAR1A   |
| 25583 | 3.730507 | 0 | 0.26806 | 0 | 1 | 4 FALSE | PSD4      |
| 25587 | 3.730507 | 0 | 0.26806 | 0 | 1 | 4 FALSE | PSMD2     |
| 25590 | 3.730507 | 0 | 0.26806 | 0 | 1 | 4 FALSE | PSMF1     |
| 25594 | 3.730507 | 0 | 0.26806 | 0 | 1 | 4 FALSE | PTK2B     |
| 25596 | 3.730507 | 0 | 0.26806 | 0 | 1 | 4 FALSE | QRSL1     |
| 25599 | 3.730507 | 0 | 0.26806 | 0 | 1 | 4 FALSE | R3HDM2    |
| 25601 | 3.730507 | 0 | 0.26806 | 0 | 1 | 4 FALSE | RAB3B     |
| 25604 | 3.730507 | 0 | 0.26806 | 0 | 1 | 4 FALSE | RABL6     |
| 25607 | 3.730507 | 0 | 0.26806 | 0 | 1 | 4 FALSE | RAD23A    |
| 25610 | 3.730507 | 0 | 0.26806 | 0 | 1 | 4 FALSE | RADIL     |
| 25612 | 3.730507 | 0 | 0.26806 | 0 | 1 | 4 FALSE | RASSF3    |
| 25614 | 3.730507 | 0 | 0.26806 | 0 | 1 | 4 FALSE | RAVER1    |
| 25616 | 3.730507 | 0 | 0.26806 | 0 | 1 | 4 FALSE | RBBP5     |
| 25620 | 3.730507 | 0 | 0.26806 | 0 | 1 | 4 FALSE | RELT      |
| 25624 | 3.730507 | 0 | 0.26806 | 0 | 1 | 4 FALSE | RFWD2     |
| 25626 | 3.730507 | 0 | 0.26806 | 0 | 1 | 4 FALSE | RFX6      |
| 25630 | 3.730507 | 0 | 0.26806 | 0 | 1 | 4 FALSE | RLF       |
| 25632 | 3.730507 | 0 | 0.26806 | 0 | 1 | 4 FALSE | RNASEH2C  |
| 25636 | 3.730507 | 0 | 0.26806 | 0 | 1 | 4 FALSE | RP11-546B |
| 25638 | 3.730507 | 0 | 0.26806 | 0 | 1 | 4 FALSE | RPL23A    |
| 25640 | 3.730507 | 0 | 0.26806 | 0 | 1 | 4 FALSE | RPL28     |
| 25643 | 3.730507 | 0 | 0.26806 | 0 | 1 | 4 FALSE | RPL35A    |
| 25645 | 3.730507 | 0 | 0.26806 | 0 | 1 | 4 FALSE | RPL5      |
| 25647 | 3.730507 | 0 | 0.26806 | 0 | 1 | 4 FALSE | RPLP0     |
| 25649 | 3.730507 | 0 | 0.26806 | 0 | 1 | 4 FALSE | RPN1      |
| 25654 | 3.730507 | 0 | 0.26806 | 0 | 1 | 4 FALSE | RTN3      |
| 25657 | 3.730507 | 0 | 0.26806 | 0 | 1 | 4 FALSE | S100A4    |
| 25662 | 3.730507 | 0 | 0.26806 | 0 | 1 | 4 FALSE | SAV1      |
| 25665 | 3.730507 | 0 | 0.26806 | 0 | 1 | 4 FALSE | SCP2      |
| 25667 | 3.730507 | 0 | 0.26806 | 0 | 1 | 4 FALSE | SCUBE1    |
| 25669 | 3.730507 | 0 | 0.26806 | 0 | 1 | 4 FALSE | SDC4      |
| 25671 | 3.730507 | 0 | 0.26806 | 0 | 1 | 4 FALSE | SEC22C    |
| 25674 | 3.730507 | 0 | 0.26806 | 0 | 1 | 4 FALSE | SEMA4G    |
| 25678 | 3.730507 | 0 | 0.26806 | 0 | 1 | 4 FALSE | SERPINB6  |
| 25684 | 3.730507 | 0 | 0.26806 | 0 | 1 | 4 FALSE | SF3A3     |
| 25687 | 3.730507 | 0 | 0.26806 | 0 | 1 | 4 FALSE | SGK3      |
| 25689 | 3.730507 | 0 | 0.26806 | 0 | 1 | 4 FALSE | SH2B1     |
| 25692 | 3.730507 | 0 | 0.26806 | 0 | 1 | 4 FALSE | SIAH1     |
| 25694 | 3.730507 | 0 | 0.26806 | 0 | 1 | 4 FALSE | SIRT1     |
| 25698 | 3.730507 | 0 | 0.26806 | 0 | 1 | 4 FALSE | SLC25A29  |
| 25700 | 3.730507 | 0 | 0.26806 | 0 | 1 | 4 FALSE | SLC25A5   |
| 25702 | 3.730507 | 0 | 0.26806 | 0 | 1 | 4 FALSE | SLC35B4   |
| 25705 | 3.730507 | 0 | 0.26806 | 0 | 1 | 4 FALSE | SLC44A2   |
| 25708 | 3.730507 | 0 | 0.26806 | 0 | 1 | 4 FALSE | SLC5A3    |

|       |          |   |         |   |   |         |          |
|-------|----------|---|---------|---|---|---------|----------|
| 25710 | 3.730507 | 0 | 0.26806 | 0 | 1 | 4 FALSE | SLC6A9   |
| 25714 | 3.730507 | 0 | 0.26806 | 0 | 1 | 4 FALSE | SLC8A3   |
| 25716 | 3.730507 | 0 | 0.26806 | 0 | 1 | 4 FALSE | SLCO3A1  |
| 25718 | 3.730507 | 0 | 0.26806 | 0 | 1 | 4 FALSE | SLIT2    |
| 25722 | 3.730507 | 0 | 0.26806 | 0 | 1 | 4 FALSE | SMARCB1  |
| 25725 | 3.730507 | 0 | 0.26806 | 0 | 1 | 4 FALSE | SMARCE1  |
| 25728 | 3.730507 | 0 | 0.26806 | 0 | 1 | 4 FALSE | SMG5     |
| 25730 | 3.730507 | 0 | 0.26806 | 0 | 1 | 4 FALSE | SMUG1    |
| 25732 | 3.730507 | 0 | 0.26806 | 0 | 1 | 4 FALSE | SNRK     |
| 25736 | 3.730507 | 0 | 0.26806 | 0 | 1 | 4 FALSE | SOX17    |
| 25740 | 3.730507 | 0 | 0.26806 | 0 | 1 | 4 FALSE | SPOCK1   |
| 25744 | 3.730507 | 0 | 0.26806 | 0 | 1 | 4 FALSE | SSBP1    |
| 25746 | 3.730507 | 0 | 0.26806 | 0 | 1 | 4 FALSE | SSPO     |
| 25749 | 3.730507 | 0 | 0.26806 | 0 | 1 | 4 FALSE | SSR2     |
| 25752 | 3.730507 | 0 | 0.26806 | 0 | 1 | 4 FALSE | ST5      |
| 25758 | 3.730507 | 0 | 0.26806 | 0 | 1 | 4 FALSE | SUCLG2   |
| 25760 | 3.730507 | 0 | 0.26806 | 0 | 1 | 4 FALSE | SULF2    |
| 25764 | 3.730507 | 0 | 0.26806 | 0 | 1 | 4 FALSE | SYVN1    |
| 25768 | 3.730507 | 0 | 0.26806 | 0 | 1 | 4 FALSE | TAF2     |
| 25770 | 3.730507 | 0 | 0.26806 | 0 | 1 | 4 FALSE | TAF5L    |
| 25773 | 3.730507 | 0 | 0.26806 | 0 | 1 | 4 FALSE | TAGLN    |
| 25777 | 3.730507 | 0 | 0.26806 | 0 | 1 | 4 FALSE | TBC1D2B  |
| 25779 | 3.730507 | 0 | 0.26806 | 0 | 1 | 4 FALSE | TBCEL    |
| 25781 | 3.730507 | 0 | 0.26806 | 0 | 1 | 4 FALSE | TBKBP1   |
| 25784 | 3.730507 | 0 | 0.26806 | 0 | 1 | 4 FALSE | TCF7L2   |
| 25786 | 3.730507 | 0 | 0.26806 | 0 | 1 | 4 FALSE | TCFL5    |
| 25789 | 3.730507 | 0 | 0.26806 | 0 | 1 | 4 FALSE | TET1     |
| 25795 | 3.730507 | 0 | 0.26806 | 0 | 1 | 4 FALSE | TIMP2    |
| 25798 | 3.730507 | 0 | 0.26806 | 0 | 1 | 4 FALSE | TM2D3    |
| 25800 | 3.730507 | 0 | 0.26806 | 0 | 1 | 4 FALSE | TMBIM1   |
| 25803 | 3.730507 | 0 | 0.26806 | 0 | 1 | 4 FALSE | TMCC1    |
| 25806 | 3.730507 | 0 | 0.26806 | 0 | 1 | 4 FALSE | TMEM106C |
| 25810 | 3.730507 | 0 | 0.26806 | 0 | 1 | 4 FALSE | TMEM140  |
| 25812 | 3.730507 | 0 | 0.26806 | 0 | 1 | 4 FALSE | TMEM151A |
| 25815 | 3.730507 | 0 | 0.26806 | 0 | 1 | 4 FALSE | TMEM177  |
| 25819 | 3.730507 | 0 | 0.26806 | 0 | 1 | 4 FALSE | TMEM206  |
| 25829 | 3.730507 | 0 | 0.26806 | 0 | 1 | 4 FALSE | TRIM63   |
| 25831 | 3.730507 | 0 | 0.26806 | 0 | 1 | 4 FALSE | TRPM6    |
| 25833 | 3.730507 | 0 | 0.26806 | 0 | 1 | 4 FALSE | TRRAP    |
| 25835 | 3.730507 | 0 | 0.26806 | 0 | 1 | 4 FALSE | TSC22D1  |
| 25837 | 3.730507 | 0 | 0.26806 | 0 | 1 | 4 FALSE | TSKU     |
| 25841 | 3.730507 | 0 | 0.26806 | 0 | 1 | 4 FALSE | TTC3     |
| 25843 | 3.730507 | 0 | 0.26806 | 0 | 1 | 4 FALSE | TXNRD2   |
| 25847 | 3.730507 | 0 | 0.26806 | 0 | 1 | 4 FALSE | UBE2C    |
| 25849 | 3.730507 | 0 | 0.26806 | 0 | 1 | 4 FALSE | UBE2D4   |
| 25851 | 3.730507 | 0 | 0.26806 | 0 | 1 | 4 FALSE | UBE2I    |
| 25856 | 3.730507 | 0 | 0.26806 | 0 | 1 | 4 FALSE | UFC1     |

|       |          |   |         |   |   |         |         |
|-------|----------|---|---------|---|---|---------|---------|
| 25859 | 3.730507 | 0 | 0.26806 | 0 | 1 | 4 FALSE | USP20   |
| 25861 | 3.730507 | 0 | 0.26806 | 0 | 1 | 4 FALSE | USP21   |
| 25864 | 3.730507 | 0 | 0.26806 | 0 | 1 | 4 FALSE | USP31   |
| 25872 | 3.730507 | 0 | 0.26806 | 0 | 1 | 4 FALSE | VPS13D  |
| 25875 | 3.730507 | 0 | 0.26806 | 0 | 1 | 4 FALSE | WDR41   |
| 25880 | 3.730507 | 0 | 0.26806 | 0 | 1 | 4 FALSE | XPO5    |
| 25882 | 3.730507 | 0 | 0.26806 | 0 | 1 | 4 FALSE | XRCC3   |
| 25884 | 3.730507 | 0 | 0.26806 | 0 | 1 | 4 FALSE | XRCC6   |
| 25886 | 3.730507 | 0 | 0.26806 | 0 | 1 | 4 FALSE | YBEY    |
| 25888 | 3.730507 | 0 | 0.26806 | 0 | 1 | 4 FALSE | YIPF3   |
| 25892 | 3.730507 | 0 | 0.26806 | 0 | 1 | 4 FALSE | YWHAH   |
| 25899 | 3.730507 | 0 | 0.26806 | 0 | 1 | 4 FALSE | ZBTB41  |
| 25902 | 3.730507 | 0 | 0.26806 | 0 | 1 | 4 FALSE | ZDHHC9  |
| 25904 | 3.730507 | 0 | 0.26806 | 0 | 1 | 4 FALSE | ZFHX2   |
| 25909 | 3.730507 | 0 | 0.26806 | 0 | 1 | 4 FALSE | ZNF212  |
| 25912 | 3.730507 | 0 | 0.26806 | 0 | 1 | 4 FALSE | ZNF224  |
| 25917 | 3.730507 | 0 | 0.26806 | 0 | 1 | 4 FALSE | ZNF391  |
| 25919 | 3.730507 | 0 | 0.26806 | 0 | 1 | 4 FALSE | ZNF442  |
| 25923 | 3.730507 | 0 | 0.26806 | 0 | 1 | 4 FALSE | ZNF585B |
| 25926 | 3.730507 | 0 | 0.26806 | 0 | 1 | 4 FALSE | ZNF646  |
| 25929 | 3.730507 | 0 | 0.26806 | 0 | 1 | 4 FALSE | ZNF706  |
| 25932 | 3.730507 | 0 | 0.26806 | 0 | 1 | 4 FALSE | ZNF853  |

| Neighborhood | NumberOfNodes | NumberOfPartners | OfNodes | Radiality | selected | SelfLoops | shared     | nan      | Stress   | Topologica |
|--------------|---------------|------------------|---------|-----------|----------|-----------|------------|----------|----------|------------|
| 2.099411     | 1358          | 0                | 0       | 0.75063   | TRUE     | 0         | hsa-miR-1c | 2.02E+09 | 0.064671 |            |
| 789          | 8             | 0                | 0       | 0.761382  | FALSE    | 0         | BTG2       | 20905236 | 0.185981 |            |
| 675.5        | 8             | 0                | 0       | 0.747066  | FALSE    | 0         | CCND2      | 15737972 | 0.168457 |            |
| 771.75       | 8             | 0                | 0       | 0.758495  | FALSE    | 0         | NUFIP2     | 20511750 | 0.18395  |            |
| 854.5        | 8             | 0                | 0       | 0.794747  | FALSE    | 0         | THBS1      | 26545014 | 0.178556 |            |
| 669.625      | 8             | 0                | 0       | 0.735453  | FALSE    | 0         | UBN2       | 14902830 | 0.175262 |            |
| 672.75       | 8             | 0                | 0       | 0.735084  | FALSE    | 0         | GIGYF1     | 16290916 | 0.176359 |            |
| 796.7143     | 7             | 0                | 0       | 0.75235   | FALSE    | 0         | CCND1      | 16148240 | 0.194504 |            |
| 839.2857     | 7             | 0                | 0       | 0.762304  | FALSE    | 0         | IGF1R      | 18266458 | 0.197105 |            |
| 742.1429     | 7             | 0                | 0       | 0.728141  | FALSE    | 0         | IREB2      | 14401138 | 0.200471 |            |
| 609          | 7             | 0                | 0       | 0.69361   | FALSE    | 0         | REL        | 9621964  | 0.193939 |            |
| 832          | 7             | 0                | 0       | 0.747619  | FALSE    | 0         | TNRC6A     | 17072328 | 0.207025 |            |
| 843          | 7             | 0                | 0       | 0.750138  | FALSE    | 0         | UHMK1      | 17568798 | 0.207645 |            |
| 797.4286     | 7             | 0                | 0       | 0.746697  | FALSE    | 0         | MDM2       | 17505206 | 0.199157 |            |
| 963.1667     | 6             | 0                | 0       | 0.74553   | FALSE    | 0         | ADAM10     | 16403092 | 0.24169  |            |
| 842.3333     | 6             | 0                | 0       | 0.72212   | FALSE    | 0         | CDKN1A     | 12524454 | 0.233704 |            |
| 858.5        | 6             | 0                | 0       | 0.724025  | FALSE    | 0         | EIF4G2     | 12506998 | 0.236161 |            |
| 950.3333     | 6             | 0                | 0       | 0.742949  | FALSE    | 0         | ELK4       | 15935648 | 0.241009 |            |
| 795.8333     | 6             | 0                | 0       | 0.712227  | FALSE    | 0         | ETNK1      | 12127798 | 0.231123 |            |
| 855.1667     | 6             | 0                | 0       | 0.724516  | FALSE    | 0         | HNRNPU     | 12935884 | 0.234726 |            |
| 899          | 6             | 0                | 0       | 0.731521  | FALSE    | 0         | HNRNPUL1   | 14070752 | 0.239275 |            |
| 855.1667     | 6             | 0                | 0       | 0.724516  | FALSE    | 0         | LRRC58     | 12935884 | 0.234726 |            |
| 717.1667     | 6             | 0                | 0       | 0.70977   | FALSE    | 0         | MAP1B      | 9887264  | 0.210699 |            |
| 749.5        | 6             | 0                | 0       | 0.703318  | FALSE    | 0         | NACC1      | 9257174  | 0.227231 |            |
| 596          | 6             | 0                | 0       | 0.683103  | FALSE    | 0         | PANK3      | 6708940  | 0.200675 |            |
| 971.8333     | 6             | 0                | 0       | 0.760461  | FALSE    | 0         | PRDM2      | 17325698 | 0.229837 |            |
| 684.5        | 6             | 0                | 0       | 0.702396  | FALSE    | 0         | PURB       | 7430920  | 0.208448 |            |
| 863          | 6             | 0                | 0       | 0.724639  | FALSE    | 0         | REV3L      | 12369974 | 0.236748 |            |
| 657          | 6             | 0                | 0       | 0.696068  | FALSE    | 0         | RREB1      | 8890114  | 0.206549 |            |
| 863          | 6             | 0                | 0       | 0.724639  | FALSE    | 0         | SFT2D2     | 12369974 | 0.236748 |            |
| 963.1667     | 6             | 0                | 0       | 0.74553   | FALSE    | 0         | TET3       | 16403092 | 0.24169  |            |
| 963.1667     | 6             | 0                | 0       | 0.74553   | FALSE    | 0         | TMBIM6     | 16403092 | 0.24169  |            |
| 903.5        | 6             | 0                | 0       | 0.738771  | FALSE    | 0         | TNPO1      | 14897960 | 0.233144 |            |
| 883.8333     | 6             | 0                | 0       | 0.728694  | FALSE    | 0         | ZNF264     | 13222282 | 0.238153 |            |
| 925          | 6             | 0                | 0       | 0.738157  | FALSE    | 0         | ZNF678     | 15165254 | 0.239316 |            |
| 722.1667     | 6             | 0                | 0       | 0.703134  | FALSE    | 0         | ALDOA      | 9923412  | 0.219133 |            |
| 748.8333     | 6             | 0                | 0       | 0.722919  | FALSE    | 0         | CCDC80     | 11364320 | 0.206984 |            |
| 472.1667     | 6             | 0                | 0       | 0.632473  | FALSE    | 0         | NF2        | 4988980  | 0.220069 |            |
| 818.3333     | 6             | 0                | 0       | 0.717757  | FALSE    | 0         | CBX6       | 12239892 | 0.231605 |            |
| 753          | 6             | 0                | 0       | 0.704547  | FALSE    | 0         | DDX21      | 10865764 | 0.226916 |            |
| 990.6        | 5             | 0                | 0       | 0.730783  | FALSE    | 0         | AGO1       | 11413454 | 0.264458 |            |
| 783          | 5             | 0                | 0       | 0.700799  | FALSE    | 0         | AGO3       | 6989230  | 0.24032  |            |
| 1018.4       | 5             | 0                | 0       | 0.737358  | FALSE    | 0         | ANKRD17    | 12376950 | 0.264328 |            |
| 934.4        | 5             | 0                | 0       | 0.706206  | FALSE    | 0         | ATXN1L     | 9519410  | 0.279294 |            |
| 928.8        | 5             | 0                | 0       | 0.725684  | FALSE    | 0         | BAG5       | 10323112 | 0.253567 |            |
| 1011.4       | 5             | 0                | 0       | 0.720768  | FALSE    | 0         | C16orf72   | 11475588 | 0.282314 |            |

|        |   |   |   |          |       |   |           |          |          |
|--------|---|---|---|----------|-------|---|-----------|----------|----------|
| 817.6  | 5 | 0 | 0 | 0.702273 | FALSE | 0 | CDK6      | 8751240  | 0.249115 |
| 697.4  | 5 | 0 | 0 | 0.67874  | FALSE | 0 | COL12A1   | 6023786  | 0.240553 |
| 836.4  | 5 | 0 | 0 | 0.706022 | FALSE | 0 | COL5A2    | 9126938  | 0.250195 |
| 804    | 5 | 0 | 0 | 0.700184 | FALSE | 0 | CPEB4     | 6844790  | 0.247534 |
| 749    | 5 | 0 | 0 | 0.67149  | FALSE | 0 | EDEM3     | 6820144  | 0.269355 |
| 946.8  | 5 | 0 | 0 | 0.730108 | FALSE | 0 | GAN       | 11080106 | 0.253498 |
| 965.6  | 5 | 0 | 0 | 0.713088 | FALSE | 0 | GSK3B     | 10422946 | 0.27927  |
| 967.6  | 5 | 0 | 0 | 0.73447  | FALSE | 0 | IRF4      | 11627590 | 0.254235 |
| 924    | 5 | 0 | 0 | 0.721751 | FALSE | 0 | ITGB8     | 9877316  | 0.256745 |
| 624    | 5 | 0 | 0 | 0.664424 | FALSE | 0 | JMJD1C    | 4548708  | 0.234035 |
| 885.8  | 5 | 0 | 0 | 0.697481 | FALSE | 0 | KMT2C     | 8173626  | 0.2765   |
| 653.8  | 5 | 0 | 0 | 0.651091 | FALSE | 0 | LCOR      | 4875970  | 0.266994 |
| 609    | 5 | 0 | 0 | 0.661106 | FALSE | 0 | LMNB2     | 4207308  | 0.233129 |
| 749    | 5 | 0 | 0 | 0.67149  | FALSE | 0 | LNPEP     | 6820144  | 0.269355 |
| 705.8  | 5 | 0 | 0 | 0.663257 | FALSE | 0 | MAP3K7    | 5609862  | 0.266667 |
| 885.8  | 5 | 0 | 0 | 0.697481 | FALSE | 0 | MED13     | 8173626  | 0.2765   |
| 934.4  | 5 | 0 | 0 | 0.706206 | FALSE | 0 | MKLN1     | 9519410  | 0.279294 |
| 897.6  | 5 | 0 | 0 | 0.718925 | FALSE | 0 | PEG10     | 9431052  | 0.252635 |
| 1011.4 | 5 | 0 | 0 | 0.720768 | FALSE | 0 | PLAG1     | 11475588 | 0.282314 |
| 1003   | 5 | 0 | 0 | 0.735146 | FALSE | 0 | PRRC2C    | 11978214 | 0.262785 |
| 998    | 5 | 0 | 0 | 0.738587 | FALSE | 0 | RNF11     | 12291232 | 0.257689 |
| 965.6  | 5 | 0 | 0 | 0.713088 | FALSE | 0 | RORA      | 10422946 | 0.27927  |
| 914.6  | 5 | 0 | 0 | 0.720645 | FALSE | 0 | SECISBP2L | 9334028  | 0.25541  |
| 1011.4 | 5 | 0 | 0 | 0.720768 | FALSE | 0 | SLC38A1   | 11475588 | 0.282314 |
| 944.8  | 5 | 0 | 0 | 0.725622 | FALSE | 0 | SLC38A2   | 10153792 | 0.25801  |
| 972.6  | 5 | 0 | 0 | 0.729677 | FALSE | 0 | TAOK1     | 11267922 | 0.260902 |
| 664    | 5 | 0 | 0 | 0.657051 | FALSE | 0 | TBC1D24   | 5509734  | 0.260818 |
| 924.6  | 5 | 0 | 0 | 0.726421 | FALSE | 0 | TBL1XR1   | 10625096 | 0.251594 |
| 649.8  | 5 | 0 | 0 | 0.651705 | FALSE | 0 | TMEM167   | 5141460  | 0.264277 |
| 810.6  | 5 | 0 | 0 | 0.684885 | FALSE | 0 | TULP4     | 8067296  | 0.270317 |
| 856    | 5 | 0 | 0 | 0.69232  | FALSE | 0 | VANGL1    | 8248320  | 0.27439  |
| 1023.8 | 5 | 0 | 0 | 0.73871  | FALSE | 0 | YOD1      | 12523790 | 0.264221 |
| 881.8  | 5 | 0 | 0 | 0.698341 | FALSE | 0 | ZNF12     | 8523134  | 0.274051 |
| 634.4  | 5 | 0 | 0 | 0.651582 | FALSE | 0 | ZNF292    | 4819720  | 0.258214 |
| 934.4  | 5 | 0 | 0 | 0.706206 | FALSE | 0 | ZNF367    | 9519410  | 0.279294 |
| 664    | 5 | 0 | 0 | 0.657051 | FALSE | 0 | ZNF490    | 5509734  | 0.260818 |
| 843    | 5 | 0 | 0 | 0.696928 | FALSE | 0 | ARPP19    | 8699238  | 0.263867 |
| 521.6  | 5 | 0 | 0 | 0.64169  | FALSE | 0 | SLC7A5    | 4232316  | 0.227138 |
| 667.4  | 5 | 0 | 0 | 0.67702  | FALSE | 0 | AKT1      | 4891284  | 0.232438 |
| 776.6  | 5 | 0 | 0 | 0.697665 | FALSE | 0 | ANKRD52   | 7716484  | 0.242148 |
| 603.6  | 5 | 0 | 0 | 0.638618 | FALSE | 0 | CCDC6     | 4558646  | 0.268778 |
| 565.4  | 5 | 0 | 0 | 0.647711 | FALSE | 0 | COL1A1    | 4901012  | 0.236151 |
| 884.2  | 5 | 0 | 0 | 0.701106 | FALSE | 0 | GATAD2B   | 9244460  | 0.271003 |
| 884.2  | 5 | 0 | 0 | 0.701106 | FALSE | 0 | HEATR1    | 9244460  | 0.271003 |
| 557    | 5 | 0 | 0 | 0.628356 | FALSE | 0 | MIDN      | 3859398  | 0.267952 |
| 563.4  | 5 | 0 | 0 | 0.629708 | FALSE | 0 | MYO6      | 3910424  | 0.268193 |
| 837.6  | 5 | 0 | 0 | 0.691275 | FALSE | 0 | SEC61A1   | 8124626  | 0.269958 |

|         |   |   |   |          |       |   |         |         |          |
|---------|---|---|---|----------|-------|---|---------|---------|----------|
| 718.4   | 5 | 0 | 0 | 0.685069 | FALSE | 0 | GMFB    | 6491760 | 0.239293 |
| 739.2   | 5 | 0 | 0 | 0.673395 | FALSE | 0 | MBD4    | 6434098 | 0.262892 |
| 713.4   | 5 | 0 | 0 | 0.66725  | FALSE | 0 | PRPF8   | 6182378 | 0.263072 |
| 711.6   | 5 | 0 | 0 | 0.667005 | FALSE | 0 | SESN3   | 5497918 | 0.262796 |
| 819.6   | 5 | 0 | 0 | 0.704916 | FALSE | 0 | SMAD4   | 8454880 | 0.246492 |
| 807.2   | 5 | 0 | 0 | 0.685315 | FALSE | 0 | ATP13A3 | 7531288 | 0.268554 |
| 712     | 5 | 0 | 0 | 0.667128 | FALSE | 0 | BRWD1   | 5482176 | 0.262749 |
| 758.6   | 5 | 0 | 0 | 0.677266 | FALSE | 0 | HERPUD1 | 6432952 | 0.26388  |
| 659.4   | 5 | 0 | 0 | 0.656743 | FALSE | 0 | RAB2B   | 4713826 | 0.259519 |
| 754.6   | 5 | 0 | 0 | 0.676406 | FALSE | 0 | SERTAD2 | 6710372 | 0.263773 |
| 586.2   | 5 | 0 | 0 | 0.662458 | FALSE | 0 | REXO1   | 3968722 | 0.22251  |
| 630.6   | 5 | 0 | 0 | 0.668356 | FALSE | 0 | YY1     | 4370876 | 0.230961 |
| 1045.75 | 4 | 0 | 0 | 0.688756 | FALSE | 0 | AGFG1   | 6745216 | 0.341533 |
| 974.5   | 4 | 0 | 0 | 0.695269 | FALSE | 0 | AP1G1   | 6080002 | 0.307583 |
| 780.75  | 4 | 0 | 0 | 0.663932 | FALSE | 0 | ARCN1   | 4433956 | 0.293691 |
| 941.5   | 4 | 0 | 0 | 0.692258 | FALSE | 0 | ARHGAP1 | 5760294 | 0.301829 |
| 1099.25 | 4 | 0 | 0 | 0.71831  | FALSE | 0 | ATL2    | 8790338 | 0.31024  |
| 1022.25 | 4 | 0 | 0 | 0.701598 | FALSE | 0 | BACH1   | 6931008 | 0.3125   |
| 803.5   | 4 | 0 | 0 | 0.668602 | FALSE | 0 | BAZ2A   | 4983626 | 0.293848 |
| 733.25  | 4 | 0 | 0 | 0.658525 | FALSE | 0 | BICD2   | 4079620 | 0.285255 |
| 1045.75 | 4 | 0 | 0 | 0.688756 | FALSE | 0 | BTBD3   | 6745216 | 0.341533 |
| 1054.5  | 4 | 0 | 0 | 0.706882 | FALSE | 0 | BTBD7   | 7569014 | 0.314103 |
| 794.75  | 4 | 0 | 0 | 0.649186 | FALSE | 0 | CAPN2   | 4377246 | 0.328675 |
| 1150.75 | 4 | 0 | 0 | 0.721751 | FALSE | 0 | CBX5    | 9339650 | 0.31973  |
| 865     | 4 | 0 | 0 | 0.67831  | FALSE | 0 | CD44    | 5688536 | 0.299065 |
| 814     | 4 | 0 | 0 | 0.652135 | FALSE | 0 | CD81    | 4604768 | 0.330085 |
| 937.25  | 4 | 0 | 0 | 0.694347 | FALSE | 0 | CDC14B  | 6198482 | 0.297222 |
| 1092.5  | 4 | 0 | 0 | 0.712535 | FALSE | 0 | CHD1    | 8176470 | 0.316744 |
| 1058.75 | 4 | 0 | 0 | 0.706697 | FALSE | 0 | CLTC    | 7548080 | 0.315652 |
| 1035.25 | 4 | 0 | 0 | 0.704301 | FALSE | 0 | CNOT6   | 7252638 | 0.312274 |
| 1045.75 | 4 | 0 | 0 | 0.688756 | FALSE | 0 | CSDE1   | 6745216 | 0.341533 |
| 765.25  | 4 | 0 | 0 | 0.660676 | FALSE | 0 | CSNK1G3 | 4146904 | 0.293716 |
| 956.5   | 4 | 0 | 0 | 0.693426 | FALSE | 0 | DAZAP2  | 6077254 | 0.304785 |
| 742.75  | 4 | 0 | 0 | 0.65828  | FALSE | 0 | DDIT4   | 4080634 | 0.289407 |
| 935     | 4 | 0 | 0 | 0.689985 | FALSE | 0 | DDX3X   | 5460174 | 0.303345 |
| 1054.5  | 4 | 0 | 0 | 0.706882 | FALSE | 0 | DICER1  | 7569014 | 0.314103 |
| 880.75  | 4 | 0 | 0 | 0.682796 | FALSE | 0 | DR1     | 4694772 | 0.297012 |
| 1150.75 | 4 | 0 | 0 | 0.721751 | FALSE | 0 | DSTYK   | 9339650 | 0.31973  |
| 852     | 4 | 0 | 0 | 0.658525 | FALSE | 0 | DYNLL2  | 4996170 | 0.331515 |
| 1035.25 | 4 | 0 | 0 | 0.704301 | FALSE | 0 | E2F3    | 7252638 | 0.312274 |
| 943.25  | 4 | 0 | 0 | 0.690661 | FALSE | 0 | FBN1    | 5479836 | 0.304935 |
| 653.25  | 4 | 0 | 0 | 0.642919 | FALSE | 0 | FKBP8   | 3065956 | 0.281993 |
| 1093.5  | 4 | 0 | 0 | 0.713641 | FALSE | 0 | FZD6    | 8382820 | 0.315387 |
| 794.75  | 4 | 0 | 0 | 0.649186 | FALSE | 0 | G3BP1   | 4377246 | 0.328675 |
| 941.5   | 4 | 0 | 0 | 0.692258 | FALSE | 0 | GNPTAB  | 5760294 | 0.301829 |
| 943.25  | 4 | 0 | 0 | 0.690661 | FALSE | 0 | HBP1    | 5479836 | 0.304935 |
| 705.5   | 4 | 0 | 0 | 0.65275  | FALSE | 0 | HDGF    | 4078020 | 0.284877 |

|         |   |   |   |          |       |   |          |         |          |
|---------|---|---|---|----------|-------|---|----------|---------|----------|
| 1131.5  | 4 | 0 | 0 | 0.719048 | FALSE | 0 | HECTD1   | 8964572 | 0.318271 |
| 1045.75 | 4 | 0 | 0 | 0.688756 | FALSE | 0 | HIPK1    | 6745216 | 0.341533 |
| 982     | 4 | 0 | 0 | 0.697174 | FALSE | 0 | HIPK3    | 5935852 | 0.306946 |
| 852     | 4 | 0 | 0 | 0.658525 | FALSE | 0 | HNRNPA2E | 4996170 | 0.331515 |
| 1045.75 | 4 | 0 | 0 | 0.688756 | FALSE | 0 | HNRNPF   | 6745216 | 0.341533 |
| 886.75  | 4 | 0 | 0 | 0.68255  | FALSE | 0 | HSPA1A   | 6062974 | 0.299442 |
| 852     | 4 | 0 | 0 | 0.658525 | FALSE | 0 | HSPA4L   | 4996170 | 0.331515 |
| 1131.5  | 4 | 0 | 0 | 0.719048 | FALSE | 0 | HUWE1    | 8964572 | 0.318271 |
| 852     | 4 | 0 | 0 | 0.658525 | FALSE | 0 | KDM6B    | 4996170 | 0.331515 |
| 664     | 4 | 0 | 0 | 0.625591 | FALSE | 0 | KIAA1586 | 2598860 | 0.32644  |
| 830.25  | 4 | 0 | 0 | 0.674071 | FALSE | 0 | KPNA6    | 4055114 | 0.29406  |
| 899.75  | 4 | 0 | 0 | 0.684516 | FALSE | 0 | KRT80    | 6296416 | 0.300585 |
| 814     | 4 | 0 | 0 | 0.652135 | FALSE | 0 | LBR      | 4604768 | 0.330085 |
| 1150.75 | 4 | 0 | 0 | 0.721751 | FALSE | 0 | LIFR     | 9339650 | 0.31973  |
| 974.5   | 4 | 0 | 0 | 0.695269 | FALSE | 0 | MAPK14   | 6080002 | 0.307583 |
| 992.25  | 4 | 0 | 0 | 0.698771 | FALSE | 0 | MBD2     | 6256374 | 0.307651 |
| 1054.5  | 4 | 0 | 0 | 0.706882 | FALSE | 0 | MBD6     | 7569014 | 0.314103 |
| 1045.75 | 4 | 0 | 0 | 0.688756 | FALSE | 0 | MFSD6    | 6745216 | 0.341533 |
| 803.5   | 4 | 0 | 0 | 0.668602 | FALSE | 0 | MKI67    | 4983626 | 0.293848 |
| 1045.75 | 4 | 0 | 0 | 0.688756 | FALSE | 0 | MOB1B    | 6745216 | 0.341533 |
| 1035.25 | 4 | 0 | 0 | 0.704301 | FALSE | 0 | NAP1L1   | 7252638 | 0.312274 |
| 1037.75 | 4 | 0 | 0 | 0.707558 | FALSE | 0 | NCKAP1   | 7323926 | 0.308098 |
| 771.25  | 4 | 0 | 0 | 0.663687 | FALSE | 0 | NOTCH1   | 4567772 | 0.290551 |
| 1093.5  | 4 | 0 | 0 | 0.713641 | FALSE | 0 | NRAS     | 8382820 | 0.315387 |
| 852     | 4 | 0 | 0 | 0.658525 | FALSE | 0 | NSD1     | 4996170 | 0.331515 |
| 884.25  | 4 | 0 | 0 | 0.68126  | FALSE | 0 | NUCKS1   | 5947556 | 0.300732 |
| 762.5   | 4 | 0 | 0 | 0.645929 | FALSE | 0 | NUPL2    | 4197842 | 0.322396 |
| 754.5   | 4 | 0 | 0 | 0.663011 | FALSE | 0 | ORAI2    | 4496214 | 0.285417 |
| 1150.75 | 4 | 0 | 0 | 0.721751 | FALSE | 0 | OTUD4    | 9339650 | 0.31973  |
| 690     | 4 | 0 | 0 | 0.63063  | FALSE | 0 | PABPN1   | 3193976 | 0.326077 |
| 806     | 4 | 0 | 0 | 0.671183 | FALSE | 0 | PDZD8    | 4985722 | 0.290299 |
| 852     | 4 | 0 | 0 | 0.658525 | FALSE | 0 | PHF3     | 4996170 | 0.331515 |
| 795     | 4 | 0 | 0 | 0.667865 | FALSE | 0 | PIM1     | 4965990 | 0.292019 |
| 928     | 4 | 0 | 0 | 0.687343 | FALSE | 0 | PJA2     | 5139900 | 0.305336 |
| 800     | 4 | 0 | 0 | 0.666943 | FALSE | 0 | PLEKHA1  | 4676764 | 0.295488 |
| 1150.75 | 4 | 0 | 0 | 0.721751 | FALSE | 0 | PPP2R5E  | 9339650 | 0.31973  |
| 988.75  | 4 | 0 | 0 | 0.698894 | FALSE | 0 | PPP3R1   | 6741516 | 0.306374 |
| 1045.75 | 4 | 0 | 0 | 0.688756 | FALSE | 0 | PRKAA1   | 6745216 | 0.341533 |
| 886.75  | 4 | 0 | 0 | 0.68255  | FALSE | 0 | PRKCE    | 6062974 | 0.299442 |
| 852     | 4 | 0 | 0 | 0.658525 | FALSE | 0 | PTBP3    | 4996170 | 0.331515 |
| 852     | 4 | 0 | 0 | 0.658525 | FALSE | 0 | PTGS2    | 4996170 | 0.331515 |
| 974.5   | 4 | 0 | 0 | 0.695269 | FALSE | 0 | RAB14    | 6080002 | 0.307583 |
| 899.75  | 4 | 0 | 0 | 0.684516 | FALSE | 0 | RAD23B   | 6296416 | 0.300585 |
| 755.75  | 4 | 0 | 0 | 0.641321 | FALSE | 0 | RAPH1    | 3815298 | 0.330017 |
| 1031.75 | 4 | 0 | 0 | 0.703625 | FALSE | 0 | RC3H2    | 6924654 | 0.312254 |
| 948.25  | 4 | 0 | 0 | 0.696068 | FALSE | 0 | REEP3    | 6232234 | 0.298065 |
| 852     | 4 | 0 | 0 | 0.658525 | FALSE | 0 | RFX7     | 4996170 | 0.331515 |



|         |   |   |   |          |       |   |          |         |          |
|---------|---|---|---|----------|-------|---|----------|---------|----------|
| 574.5   | 4 | 0 | 0 | 0.629278 | FALSE | 0 | SCAF11   | 2451800 | 0.274271 |
| 841.5   | 4 | 0 | 0 | 0.674562 | FALSE | 0 | SESN2    | 5417762 | 0.297207 |
| 762.5   | 4 | 0 | 0 | 0.645929 | FALSE | 0 | SLC1A5   | 4197842 | 0.322396 |
| 852     | 4 | 0 | 0 | 0.658525 | FALSE | 0 | SLC25A33 | 4996170 | 0.331515 |
| 1116    | 4 | 0 | 0 | 0.714562 | FALSE | 0 | SP3      | 8451978 | 0.320494 |
| 852     | 4 | 0 | 0 | 0.658525 | FALSE | 0 | SQSTM1   | 4996170 | 0.331515 |
| 701     | 4 | 0 | 0 | 0.633333 | FALSE | 0 | SRSF1    | 3208454 | 0.324525 |
| 1035.25 | 4 | 0 | 0 | 0.704301 | FALSE | 0 | TGFBR2   | 7252638 | 0.312274 |
| 1045.75 | 4 | 0 | 0 | 0.688756 | FALSE | 0 | TPD52    | 6745216 | 0.341533 |
| 701     | 4 | 0 | 0 | 0.633333 | FALSE | 0 | TSPYL1   | 3208454 | 0.324525 |
| 755.75  | 4 | 0 | 0 | 0.641321 | FALSE | 0 | TXNIP    | 3815298 | 0.330017 |
| 954     | 4 | 0 | 0 | 0.691705 | FALSE | 0 | UBE2G1   | 5954568 | 0.306727 |
| 1150.75 | 4 | 0 | 0 | 0.721751 | FALSE | 0 | UBE2Z    | 9339650 | 0.31973  |
| 1093.5  | 4 | 0 | 0 | 0.713641 | FALSE | 0 | USP37    | 8382820 | 0.315387 |
| 1000.75 | 4 | 0 | 0 | 0.70043  | FALSE | 0 | VWA9     | 6377522 | 0.30771  |
| 924.75  | 4 | 0 | 0 | 0.688387 | FALSE | 0 | WDR33    | 5152464 | 0.302571 |
| 1099.25 | 4 | 0 | 0 | 0.71831  | FALSE | 0 | WNK1     | 8790338 | 0.31024  |
| 1099.25 | 4 | 0 | 0 | 0.71831  | FALSE | 0 | XIAP     | 8790338 | 0.31024  |
| 993.75  | 4 | 0 | 0 | 0.698464 | FALSE | 0 | YWHAG    | 6398012 | 0.308595 |
| 1150.75 | 4 | 0 | 0 | 0.721751 | FALSE | 0 | ZBTB18   | 9339650 | 0.31973  |
| 1150.75 | 4 | 0 | 0 | 0.721751 | FALSE | 0 | ZNF217   | 9339650 | 0.31973  |
| 1093.5  | 4 | 0 | 0 | 0.713641 | FALSE | 0 | ZNF451   | 8382820 | 0.315387 |
| 940.25  | 4 | 0 | 0 | 0.698341 | FALSE | 0 | ATP6V0E1 | 6938146 | 0.292146 |
| 770     | 4 | 0 | 0 | 0.670015 | FALSE | 0 | CEP104   | 4512618 | 0.27923  |
| 251     | 4 | 0 | 0 | 0.558065 | FALSE | 0 | CKAP4    | 784940  | 0.26824  |
| 731     | 4 | 0 | 0 | 0.662949 | FALSE | 0 | DSEL     | 3959712 | 0.27662  |
| 835.25  | 4 | 0 | 0 | 0.661598 | FALSE | 0 | EIF4EBP2 | 4748622 | 0.318781 |
| 835.25  | 4 | 0 | 0 | 0.661598 | FALSE | 0 | ITPRIPL2 | 4748622 | 0.318781 |
| 816.25  | 4 | 0 | 0 | 0.677757 | FALSE | 0 | KDELR1   | 5154386 | 0.283073 |
| 821.25  | 4 | 0 | 0 | 0.678618 | FALSE | 0 | MIER3    | 4985366 | 0.283431 |
| 835.25  | 4 | 0 | 0 | 0.661598 | FALSE | 0 | MTHFD1   | 4748622 | 0.318781 |
| 537.25  | 4 | 0 | 0 | 0.620307 | FALSE | 0 | MYADM    | 2591408 | 0.275707 |
| 778.25  | 4 | 0 | 0 | 0.671982 | FALSE | 0 | OTUD7B   | 4764656 | 0.278984 |
| 940.25  | 4 | 0 | 0 | 0.698341 | FALSE | 0 | PSMA4    | 6938146 | 0.292146 |
| 940.25  | 4 | 0 | 0 | 0.698341 | FALSE | 0 | PTEN     | 6938146 | 0.292146 |
| 275     | 4 | 0 | 0 | 0.562734 | FALSE | 0 | SNRPD1   | 729688  | 0.271825 |
| 670.25  | 4 | 0 | 0 | 0.652012 | FALSE | 0 | STK4     | 3141628 | 0.271942 |
| 835.25  | 4 | 0 | 0 | 0.661598 | FALSE | 0 | TXLNG    | 4748622 | 0.318781 |
| 835.25  | 4 | 0 | 0 | 0.661598 | FALSE | 0 | ZNF117   | 4748622 | 0.318781 |
| 575     | 4 | 0 | 0 | 0.625038 | FALSE | 0 | ABHD2    | 2559602 | 0.283877 |
| 972.5   | 4 | 0 | 0 | 0.698464 | FALSE | 0 | AHNAK    | 7084596 | 0.301989 |
| 634.75  | 4 | 0 | 0 | 0.616498 | FALSE | 0 | AKT2     | 2899382 | 0.336564 |
| 933.5   | 4 | 0 | 0 | 0.691644 | FALSE | 0 | BAZ1B    | 6386780 | 0.300225 |
| 667     | 4 | 0 | 0 | 0.640891 | FALSE | 0 | BCL2L13  | 3660654 | 0.292105 |
| 872.75  | 4 | 0 | 0 | 0.683472 | FALSE | 0 | BRWD3    | 5382412 | 0.293222 |
| 972.5   | 4 | 0 | 0 | 0.698464 | FALSE | 0 | CALD1    | 7084596 | 0.301989 |
| 841.75  | 4 | 0 | 0 | 0.678863 | FALSE | 0 | CALM1    | 4889134 | 0.290114 |

|        |   |   |   |          |       |   |          |         |          |
|--------|---|---|---|----------|-------|---|----------|---------|----------|
| 853.5  | 4 | 0 | 0 | 0.679724 | FALSE | 0 | CELF1    | 5117198 | 0.292754 |
| 933.5  | 4 | 0 | 0 | 0.691644 | FALSE | 0 | CNOT4    | 6386780 | 0.300225 |
| 616.75 | 4 | 0 | 0 | 0.633641 | FALSE | 0 | COL5A1   | 3376706 | 0.284806 |
| 822.25 | 4 | 0 | 0 | 0.674316 | FALSE | 0 | CTGF     | 4546698 | 0.290811 |
| 814    | 4 | 0 | 0 | 0.673702 | FALSE | 0 | DDX6     | 4529840 | 0.288913 |
| 693    | 4 | 0 | 0 | 0.627373 | FALSE | 0 | EIF4A3   | 3520066 | 0.335922 |
| 924.75 | 4 | 0 | 0 | 0.672535 | FALSE | 0 | ELP2     | 5617722 | 0.330501 |
| 764.75 | 4 | 0 | 0 | 0.665223 | FALSE | 0 | GLS      | 3731148 | 0.285407 |
| 358.5  | 4 | 0 | 0 | 0.584793 | FALSE | 0 | HOOK3    | 1051946 | 0.261522 |
| 574    | 4 | 0 | 0 | 0.605069 | FALSE | 0 | HSPH1    | 2207846 | 0.337655 |
| 841.5  | 4 | 0 | 0 | 0.678126 | FALSE | 0 | MINK1    | 4819008 | 0.291234 |
| 682.5  | 4 | 0 | 0 | 0.644025 | FALSE | 0 | MMP2     | 3896980 | 0.292364 |
| 717.5  | 4 | 0 | 0 | 0.657727 | FALSE | 0 | NFIC     | 3376828 | 0.28054  |
| 693    | 4 | 0 | 0 | 0.627373 | FALSE | 0 | OAZ1     | 3520066 | 0.335922 |
| 634.75 | 4 | 0 | 0 | 0.616498 | FALSE | 0 | PPP1R11  | 2899382 | 0.336564 |
| 853.5  | 4 | 0 | 0 | 0.679724 | FALSE | 0 | QKI      | 5117198 | 0.292754 |
| 924.75 | 4 | 0 | 0 | 0.672535 | FALSE | 0 | RASSF5   | 5617722 | 0.330501 |
| 693    | 4 | 0 | 0 | 0.627373 | FALSE | 0 | RER1     | 3520066 | 0.335922 |
| 933.5  | 4 | 0 | 0 | 0.691644 | FALSE | 0 | SF3B3    | 6386780 | 0.300225 |
| 590.5  | 4 | 0 | 0 | 0.627742 | FALSE | 0 | SMAD3    | 2745096 | 0.285334 |
| 924.75 | 4 | 0 | 0 | 0.672535 | FALSE | 0 | TAB2     | 5617722 | 0.330501 |
| 957    | 4 | 0 | 0 | 0.694347 | FALSE | 0 | TLN1     | 6650660 | 0.303492 |
| 924.75 | 4 | 0 | 0 | 0.672535 | FALSE | 0 | TRAK2    | 5617722 | 0.330501 |
| 924.75 | 4 | 0 | 0 | 0.672535 | FALSE | 0 | TRIM26   | 5617722 | 0.330501 |
| 835.5  | 4 | 0 | 0 | 0.677327 | FALSE | 0 | ZBTB4    | 5399576 | 0.290463 |
| 485.5  | 4 | 0 | 0 | 0.586575 | FALSE | 0 | AAK1     | 1499660 | 0.347063 |
| 485.5  | 4 | 0 | 0 | 0.586575 | FALSE | 0 | ABRACL   | 1499660 | 0.347063 |
| 308.75 | 4 | 0 | 0 | 0.573671 | FALSE | 0 | AGO2     | 812174  | 0.259486 |
| 309.5  | 4 | 0 | 0 | 0.572012 | FALSE | 0 | CLSTN2   | 908708  | 0.266178 |
| 726.25 | 4 | 0 | 0 | 0.658771 | FALSE | 0 | ACTB     | 3463562 | 0.282089 |
| 876.25 | 4 | 0 | 0 | 0.682488 | FALSE | 0 | DDX17    | 5615668 | 0.295993 |
| 479.5  | 4 | 0 | 0 | 0.58596  | FALSE | 0 | EGFR     | 1842170 | 0.345238 |
| 867.5  | 4 | 0 | 0 | 0.663441 | FALSE | 0 | ERBB4    | 4902996 | 0.327352 |
| 867.5  | 4 | 0 | 0 | 0.663441 | FALSE | 0 | KDM5B    | 4902996 | 0.327352 |
| 635.75 | 4 | 0 | 0 | 0.617235 | FALSE | 0 | LTA4H    | 3053862 | 0.33496  |
| 867.5  | 4 | 0 | 0 | 0.663441 | FALSE | 0 | MAP3K5   | 4902996 | 0.327352 |
| 876.25 | 4 | 0 | 0 | 0.682488 | FALSE | 0 | VGLL4    | 5615668 | 0.295993 |
| 577.5  | 4 | 0 | 0 | 0.605438 | FALSE | 0 | ZDHHC16  | 2466176 | 0.33852  |
| 886.75 | 4 | 0 | 0 | 0.66682  | FALSE | 0 | ARL8A    | 5152924 | 0.327813 |
| 886.75 | 4 | 0 | 0 | 0.66682  | FALSE | 0 | ATG9A    | 5152924 | 0.327813 |
| 730.5  | 4 | 0 | 0 | 0.639601 | FALSE | 0 | AZIN1    | 3442470 | 0.322931 |
| 886.75 | 4 | 0 | 0 | 0.66682  | FALSE | 0 | C16orf52 | 5152924 | 0.327813 |
| 498.75 | 4 | 0 | 0 | 0.589462 | FALSE | 0 | COPA     | 1959600 | 0.344941 |
| 773.75 | 4 | 0 | 0 | 0.648817 | FALSE | 0 | DHX40    | 3639836 | 0.320776 |
| 886.75 | 4 | 0 | 0 | 0.66682  | FALSE | 0 | FASTK    | 5152924 | 0.327813 |
| 596.75 | 4 | 0 | 0 | 0.60808  | FALSE | 0 | FBXL19   | 2582200 | 0.341208 |
| 728.25 | 4 | 0 | 0 | 0.638986 | FALSE | 0 | FXR1     | 2859200 | 0.323366 |

|          |   |   |   |          |       |   |            |         |          |
|----------|---|---|---|----------|-------|---|------------|---------|----------|
| 477.75   | 4 | 0 | 0 | 0.585591 | FALSE | 0 | GXYLT2     | 1519852 | 0.345471 |
| 828.5    | 4 | 0 | 0 | 0.656129 | FALSE | 0 | KLHL15     | 4280712 | 0.327334 |
| 773.75   | 4 | 0 | 0 | 0.648817 | FALSE | 0 | MICAL2     | 3639836 | 0.320776 |
| 367.25   | 4 | 0 | 0 | 0.561874 | FALSE | 0 | RBM26      | 617212  | 0.368461 |
| 886.75   | 4 | 0 | 0 | 0.66682  | FALSE | 0 | SERBP1     | 5152924 | 0.327813 |
| 762.75   | 4 | 0 | 0 | 0.645684 | FALSE | 0 | SOX4       | 3598388 | 0.323049 |
| 736.75   | 4 | 0 | 0 | 0.640952 | FALSE | 0 | STX12      | 2955270 | 0.322556 |
| 730.5    | 4 | 0 | 0 | 0.639601 | FALSE | 0 | TP53INP1   | 3442470 | 0.322931 |
| 828.5    | 4 | 0 | 0 | 0.656129 | FALSE | 0 | ULK1       | 4280712 | 0.327334 |
| 828.5    | 4 | 0 | 0 | 0.656129 | FALSE | 0 | WASL       | 4280712 | 0.327334 |
| 767.75   | 4 | 0 | 0 | 0.646421 | FALSE | 0 | YTHDF3     | 3400346 | 0.323523 |
| 860.75   | 4 | 0 | 0 | 0.67831  | FALSE | 0 | XPO4       | 5227684 | 0.297594 |
| 647.5    | 4 | 0 | 0 | 0.645131 | FALSE | 0 | ZNF107     | 2539826 | 0.275224 |
| 776.5    | 4 | 0 | 0 | 0.666759 | FALSE | 0 | DGKH       | 4104654 | 0.287116 |
| 663.5    | 4 | 0 | 0 | 0.649739 | FALSE | 0 | MDM4       | 2855266 | 0.273309 |
| 907      | 3 | 0 | 0 | 0.647957 | FALSE | 0 | AASDHPPT   | 3004952 | 0.37813  |
| 1092.333 | 3 | 0 | 0 | 0.673825 | FALSE | 0 | ABCC5      | 3601476 | 0.38741  |
| 1217.333 | 3 | 0 | 0 | 0.686667 | FALSE | 0 | ABHD17C    | 4856064 | 0.401961 |
| 575.3333 | 3 | 0 | 0 | 0.601075 | FALSE | 0 | ABT1       | 735686  | 0.351704 |
| 984.6667 | 3 | 0 | 0 | 0.658218 | FALSE | 0 | ACLY       | 3668982 | 0.383795 |
| 1165.333 | 3 | 0 | 0 | 0.679724 | FALSE | 0 | ACSL4      | 4233224 | 0.399702 |
| 1293.667 | 3 | 0 | 0 | 0.695453 | FALSE | 0 | ADIPOR2    | 5627698 | 0.40791  |
| 1243     | 3 | 0 | 0 | 0.689862 | FALSE | 0 | AMMECR1    | 5148782 | 0.403509 |
| 1174.333 | 3 | 0 | 0 | 0.685438 | FALSE | 0 | ANKRD50    | 4740390 | 0.39033  |
| 984.6667 | 3 | 0 | 0 | 0.658218 | FALSE | 0 | AP3M1      | 3668982 | 0.383795 |
| 1084.333 | 3 | 0 | 0 | 0.670015 | FALSE | 0 | ARID4B     | 3280192 | 0.393224 |
| 907      | 3 | 0 | 0 | 0.647957 | FALSE | 0 | ARID5B     | 3004952 | 0.37813  |
| 784.3333 | 3 | 0 | 0 | 0.631797 | FALSE | 0 | ARRDC4     | 1890480 | 0.367245 |
| 819.3333 | 3 | 0 | 0 | 0.637204 | FALSE | 0 | ASH1L      | 2450598 | 0.368453 |
| 1196.667 | 3 | 0 | 0 | 0.68212  | FALSE | 0 | ATAD1      | 4441588 | 0.405036 |
| 1031.667 | 3 | 0 | 0 | 0.664363 | FALSE | 0 | ATP11A     | 2779032 | 0.387032 |
| 1243     | 3 | 0 | 0 | 0.689862 | FALSE | 0 | BUB3       | 5148782 | 0.403509 |
| 1084.333 | 3 | 0 | 0 | 0.670015 | FALSE | 0 | C11orf30   | 3280192 | 0.393224 |
| 775.3333 | 3 | 0 | 0 | 0.629708 | FALSE | 0 | C7orf55-LL | 1990264 | 0.368906 |
| 1196.667 | 3 | 0 | 0 | 0.68212  | FALSE | 0 | CAMSAP1    | 4441588 | 0.405036 |
| 839.6667 | 3 | 0 | 0 | 0.642304 | FALSE | 0 | CCNG1      | 2829228 | 0.364005 |
| 1196.667 | 3 | 0 | 0 | 0.68212  | FALSE | 0 | CCNT2      | 4441588 | 0.405036 |
| 1217.333 | 3 | 0 | 0 | 0.686667 | FALSE | 0 | CCT5       | 4856064 | 0.401961 |
| 1243     | 3 | 0 | 0 | 0.689862 | FALSE | 0 | CD47       | 5148782 | 0.403509 |
| 656      | 3 | 0 | 0 | 0.613548 | FALSE | 0 | CDK17      | 1218294 | 0.356754 |
| 862      | 3 | 0 | 0 | 0.64212  | FALSE | 0 | CFTR       | 2718468 | 0.374185 |
| 1174.333 | 3 | 0 | 0 | 0.685438 | FALSE | 0 | CHEK1      | 4740390 | 0.39033  |
| 1200     | 3 | 0 | 0 | 0.683779 | FALSE | 0 | CLIC4      | 4569518 | 0.402484 |
| 1200     | 3 | 0 | 0 | 0.683779 | FALSE | 0 | CLIP1      | 4569518 | 0.402484 |
| 941.6667 | 3 | 0 | 0 | 0.652873 | FALSE | 0 | COX2       | 3275418 | 0.379914 |
| 1031.667 | 3 | 0 | 0 | 0.664363 | FALSE | 0 | CPEB2      | 2779032 | 0.387032 |
| 856.3333 | 3 | 0 | 0 | 0.640952 | FALSE | 0 | CPEB3      | 2673652 | 0.374817 |

|          |   |   |   |          |       |   |         |         |          |
|----------|---|---|---|----------|-------|---|---------|---------|----------|
| 844.6667 | 3 | 0 | 0 | 0.619508 | FALSE | 0 | CPNE8   | 2088450 | 0.436455 |
| 916      | 3 | 0 | 0 | 0.652074 | FALSE | 0 | CYP1B1  | 3322554 | 0.371498 |
| 1077.667 | 3 | 0 | 0 | 0.670753 | FALSE | 0 | DCAF7   | 3544318 | 0.38911  |
| 1293.667 | 3 | 0 | 0 | 0.695453 | FALSE | 0 | DCP2    | 5627698 | 0.40791  |
| 787.6667 | 3 | 0 | 0 | 0.634869 | FALSE | 0 | DDX19B  | 2414912 | 0.36036  |
| 959      | 3 | 0 | 0 | 0.6549   | FALSE | 0 | DIAPH1  | 3451466 | 0.381825 |
| 839.6667 | 3 | 0 | 0 | 0.642304 | FALSE | 0 | DNAJC28 | 2829228 | 0.364005 |
| 844.6667 | 3 | 0 | 0 | 0.619508 | FALSE | 0 | DNM2    | 2088450 | 0.436455 |
| 708      | 3 | 0 | 0 | 0.620614 | FALSE | 0 | DSC2    | 1508688 | 0.362378 |
| 908.3333 | 3 | 0 | 0 | 0.649063 | FALSE | 0 | EEF2    | 3145870 | 0.375863 |
| 697.6667 | 3 | 0 | 0 | 0.61828  | FALSE | 0 | ELAVL2  | 1495292 | 0.364175 |
| 984.6667 | 3 | 0 | 0 | 0.658218 | FALSE | 0 | EMP1    | 3668982 | 0.383795 |
| 1077.667 | 3 | 0 | 0 | 0.670753 | FALSE | 0 | EMP2    | 3544318 | 0.38911  |
| 959      | 3 | 0 | 0 | 0.6549   | FALSE | 0 | ENPP2   | 3451466 | 0.381825 |
| 776.3333 | 3 | 0 | 0 | 0.63106  | FALSE | 0 | EP300   | 2271894 | 0.365551 |
| 624.6667 | 3 | 0 | 0 | 0.609063 | FALSE | 0 | EVI5    | 1119064 | 0.353753 |
| 1243     | 3 | 0 | 0 | 0.689862 | FALSE | 0 | EXOC5   | 5148782 | 0.403509 |
| 1084.333 | 3 | 0 | 0 | 0.670015 | FALSE | 0 | FAM217B | 3280192 | 0.393224 |
| 856.3333 | 3 | 0 | 0 | 0.640952 | FALSE | 0 | FAM69B  | 2673652 | 0.374817 |
| 844.6667 | 3 | 0 | 0 | 0.619508 | FALSE | 0 | FAM8A1  | 2088450 | 0.436455 |
| 1043     | 3 | 0 | 0 | 0.666144 | FALSE | 0 | FAM91A1 | 2873116 | 0.387073 |
| 1200     | 3 | 0 | 0 | 0.683779 | FALSE | 0 | FAS     | 4569518 | 0.402484 |
| 907      | 3 | 0 | 0 | 0.647957 | FALSE | 0 | FASN    | 3004952 | 0.37813  |
| 844.6667 | 3 | 0 | 0 | 0.619508 | FALSE | 0 | FBXL3   | 2088450 | 0.436455 |
| 1084.333 | 3 | 0 | 0 | 0.670015 | FALSE | 0 | FGF2    | 3280192 | 0.393224 |
| 1165.333 | 3 | 0 | 0 | 0.679724 | FALSE | 0 | FMR1    | 4233224 | 0.399702 |
| 1293.667 | 3 | 0 | 0 | 0.695453 | FALSE | 0 | FNDC3A  | 5627698 | 0.40791  |
| 1165.333 | 3 | 0 | 0 | 0.679724 | FALSE | 0 | FOSL2   | 4233224 | 0.399702 |
| 1243     | 3 | 0 | 0 | 0.689862 | FALSE | 0 | FRMD6   | 5148782 | 0.403509 |
| 959      | 3 | 0 | 0 | 0.6549   | FALSE | 0 | GATAD1  | 3451466 | 0.381825 |
| 1165.333 | 3 | 0 | 0 | 0.679724 | FALSE | 0 | GREB1L  | 4233224 | 0.399702 |
| 568.3333 | 3 | 0 | 0 | 0.601321 | FALSE | 0 | HECTD2  | 865820  | 0.346569 |
| 959      | 3 | 0 | 0 | 0.6549   | FALSE | 0 | HIF1AN  | 3451466 | 0.381825 |
| 1293.667 | 3 | 0 | 0 | 0.695453 | FALSE | 0 | HN1     | 5627698 | 0.40791  |
| 1077.667 | 3 | 0 | 0 | 0.670753 | FALSE | 0 | HSP90B1 | 3544318 | 0.38911  |
| 1217.333 | 3 | 0 | 0 | 0.686667 | FALSE | 0 | ID4     | 4856064 | 0.401961 |
| 844.6667 | 3 | 0 | 0 | 0.619508 | FALSE | 0 | IER2    | 2088450 | 0.436455 |
| 907      | 3 | 0 | 0 | 0.647957 | FALSE | 0 | IER5    | 3004952 | 0.37813  |
| 856.3333 | 3 | 0 | 0 | 0.640952 | FALSE | 0 | IFNGR2  | 2673652 | 0.374817 |
| 907      | 3 | 0 | 0 | 0.647957 | FALSE | 0 | IGF2    | 3004952 | 0.37813  |
| 1293.667 | 3 | 0 | 0 | 0.695453 | FALSE | 0 | IGF2R   | 5627698 | 0.40791  |
| 907      | 3 | 0 | 0 | 0.647957 | FALSE | 0 | INO80D  | 3004952 | 0.37813  |
| 1217.333 | 3 | 0 | 0 | 0.686667 | FALSE | 0 | IPO7    | 4856064 | 0.401961 |
| 648      | 3 | 0 | 0 | 0.612627 | FALSE | 0 | IRF2BP2 | 1542402 | 0.355299 |
| 844.6667 | 3 | 0 | 0 | 0.619508 | FALSE | 0 | JUN     | 2088450 | 0.436455 |
| 1293.667 | 3 | 0 | 0 | 0.695453 | FALSE | 0 | KANSL1  | 5627698 | 0.40791  |
| 1293.667 | 3 | 0 | 0 | 0.695453 | FALSE | 0 | KDM3B   | 5627698 | 0.40791  |

|          |   |   |   |          |       |   |          |         |          |
|----------|---|---|---|----------|-------|---|----------|---------|----------|
| 618      | 3 | 0 | 0 | 0.609862 | FALSE | 0 | KIAA1456 | 1297812 | 0.34741  |
| 1293.667 | 3 | 0 | 0 | 0.695453 | FALSE | 0 | KIAA1551 | 5627698 | 0.40791  |
| 916      | 3 | 0 | 0 | 0.652074 | FALSE | 0 | KIF5B    | 3322554 | 0.371498 |
| 1174.333 | 3 | 0 | 0 | 0.685438 | FALSE | 0 | KLF10    | 4740390 | 0.39033  |
| 1084.333 | 3 | 0 | 0 | 0.670015 | FALSE | 0 | LARP4    | 3280192 | 0.393224 |
| 775.3333 | 3 | 0 | 0 | 0.629708 | FALSE | 0 | LIN28B   | 1990264 | 0.368906 |
| 1077.667 | 3 | 0 | 0 | 0.670753 | FALSE | 0 | LZIC     | 3544318 | 0.38911  |
| 1293.667 | 3 | 0 | 0 | 0.695453 | FALSE | 0 | MAPK1    | 5627698 | 0.40791  |
| 856.3333 | 3 | 0 | 0 | 0.640952 | FALSE | 0 | MCL1     | 2673652 | 0.374817 |
| 1293.667 | 3 | 0 | 0 | 0.695453 | FALSE | 0 | MEF2D    | 5627698 | 0.40791  |
| 1165.333 | 3 | 0 | 0 | 0.679724 | FALSE | 0 | MEX3C    | 4233224 | 0.399702 |
| 1165.333 | 3 | 0 | 0 | 0.679724 | FALSE | 0 | MGRN1    | 4233224 | 0.399702 |
| 907      | 3 | 0 | 0 | 0.647957 | FALSE | 0 | MKNK2    | 3004952 | 0.37813  |
| 1293.667 | 3 | 0 | 0 | 0.695453 | FALSE | 0 | MLLT10   | 5627698 | 0.40791  |
| 1196.667 | 3 | 0 | 0 | 0.68212  | FALSE | 0 | MMGT1    | 4441588 | 0.405036 |
| 1243     | 3 | 0 | 0 | 0.689862 | FALSE | 0 | MSMO1    | 5148782 | 0.403509 |
| 844.6667 | 3 | 0 | 0 | 0.619508 | FALSE | 0 | MTPN     | 2088450 | 0.436455 |
| 1165.333 | 3 | 0 | 0 | 0.679724 | FALSE | 0 | MYCN     | 4233224 | 0.399702 |
| 1217.333 | 3 | 0 | 0 | 0.686667 | FALSE | 0 | NCBP2    | 4856064 | 0.401961 |
| 844.6667 | 3 | 0 | 0 | 0.619508 | FALSE | 0 | NDC1     | 2088450 | 0.436455 |
| 844.6667 | 3 | 0 | 0 | 0.619508 | FALSE | 0 | NEK7     | 2088450 | 0.436455 |
| 1217.333 | 3 | 0 | 0 | 0.686667 | FALSE | 0 | NPTN     | 4856064 | 0.401961 |
| 959      | 3 | 0 | 0 | 0.6549   | FALSE | 0 | NR1D2    | 3451466 | 0.381825 |
| 1217.333 | 3 | 0 | 0 | 0.686667 | FALSE | 0 | NRIP1    | 4856064 | 0.401961 |
| 683.3333 | 3 | 0 | 0 | 0.617911 | FALSE | 0 | OTULIN   | 1335418 | 0.357805 |
| 1217.333 | 3 | 0 | 0 | 0.686667 | FALSE | 0 | PAFAH1B1 | 4856064 | 0.401961 |
| 959      | 3 | 0 | 0 | 0.6549   | FALSE | 0 | PANK1    | 3451466 | 0.381825 |
| 844.6667 | 3 | 0 | 0 | 0.619508 | FALSE | 0 | PAPOLA   | 2088450 | 0.436455 |
| 938.3333 | 3 | 0 | 0 | 0.651644 | FALSE | 0 | PAPPA    | 3188648 | 0.38165  |
| 1243     | 3 | 0 | 0 | 0.689862 | FALSE | 0 | PATL1    | 5148782 | 0.403509 |
| 575.3333 | 3 | 0 | 0 | 0.601075 | FALSE | 0 | PCNX     | 735686  | 0.351704 |
| 1084.333 | 3 | 0 | 0 | 0.670015 | FALSE | 0 | PFN2     | 3280192 | 0.393224 |
| 1293.667 | 3 | 0 | 0 | 0.695453 | FALSE | 0 | PIP4K2A  | 5627698 | 0.40791  |
| 959      | 3 | 0 | 0 | 0.6549   | FALSE | 0 | PISD     | 3451466 | 0.381825 |
| 564      | 3 | 0 | 0 | 0.599416 | FALSE | 0 | PKN2     | 680630  | 0.35056  |
| 959      | 3 | 0 | 0 | 0.6549   | FALSE | 0 | PLEC     | 3451466 | 0.381825 |
| 1293.667 | 3 | 0 | 0 | 0.695453 | FALSE | 0 | POU2F1   | 5627698 | 0.40791  |
| 749.6667 | 3 | 0 | 0 | 0.626022 | FALSE | 0 | PPM1D    | 1829816 | 0.367173 |
| 1293.667 | 3 | 0 | 0 | 0.695453 | FALSE | 0 | PPP1R15B | 5627698 | 0.40791  |
| 1293.667 | 3 | 0 | 0 | 0.695453 | FALSE | 0 | PPP2R2A  | 5627698 | 0.40791  |
| 844.6667 | 3 | 0 | 0 | 0.619508 | FALSE | 0 | PPP2R5D  | 2088450 | 0.436455 |
| 1243     | 3 | 0 | 0 | 0.689862 | FALSE | 0 | PREPL    | 5148782 | 0.403509 |
| 1243     | 3 | 0 | 0 | 0.689862 | FALSE | 0 | PSAP     | 5148782 | 0.403509 |
| 1293.667 | 3 | 0 | 0 | 0.695453 | FALSE | 0 | PTPN4    | 5627698 | 0.40791  |
| 648      | 3 | 0 | 0 | 0.612627 | FALSE | 0 | PTPRJ    | 1542402 | 0.355299 |
| 1042.667 | 3 | 0 | 0 | 0.665469 | FALSE | 0 | PUM1     | 2811186 | 0.388537 |
| 1293.667 | 3 | 0 | 0 | 0.695453 | FALSE | 0 | PURA     | 5627698 | 0.40791  |

|          |   |   |   |          |       |             |         |          |
|----------|---|---|---|----------|-------|-------------|---------|----------|
| 826      | 3 | 0 | 0 | 0.636221 | FALSE | 0 QSER1     | 2240750 | 0.37415  |
| 784.3333 | 3 | 0 | 0 | 0.631797 | FALSE | 0 RAB11FIP1 | 1890480 | 0.367245 |
| 834      | 3 | 0 | 0 | 0.640215 | FALSE | 0 RAB33B    | 2485298 | 0.36696  |
| 865.3333 | 3 | 0 | 0 | 0.643103 | FALSE | 0 RAC1      | 2788758 | 0.37304  |
| 1092.333 | 3 | 0 | 0 | 0.673825 | FALSE | 0 RANBP6    | 3601476 | 0.38741  |
| 1018     | 3 | 0 | 0 | 0.662704 | FALSE | 0 RAP1B     | 2536618 | 0.385812 |
| 1084.333 | 3 | 0 | 0 | 0.670015 | FALSE | 0 RAP2B     | 3280192 | 0.393224 |
| 1217.333 | 3 | 0 | 0 | 0.686667 | FALSE | 0 RASA1     | 4856064 | 0.401961 |
| 908.3333 | 3 | 0 | 0 | 0.649063 | FALSE | 0 RBBP7     | 3145870 | 0.375863 |
| 1243     | 3 | 0 | 0 | 0.689862 | FALSE | 0 RGL1      | 5148782 | 0.403509 |
| 1293.667 | 3 | 0 | 0 | 0.695453 | FALSE | 0 RGMB      | 5627698 | 0.40791  |
| 844.6667 | 3 | 0 | 0 | 0.619508 | FALSE | 0 RHOA      | 2088450 | 0.436455 |
| 844.6667 | 3 | 0 | 0 | 0.619508 | FALSE | 0 RIC1      | 2088450 | 0.436455 |
| 1217.333 | 3 | 0 | 0 | 0.686667 | FALSE | 0 RLIM      | 4856064 | 0.401961 |
| 722.6667 | 3 | 0 | 0 | 0.624363 | FALSE | 0 RNF41     | 1669096 | 0.358681 |
| 1084.333 | 3 | 0 | 0 | 0.670015 | FALSE | 0 RNF44     | 3280192 | 0.393224 |
| 1165.333 | 3 | 0 | 0 | 0.679724 | FALSE | 0 RPA2      | 4233224 | 0.399702 |
| 1293.667 | 3 | 0 | 0 | 0.695453 | FALSE | 0 RTN4      | 5627698 | 0.40791  |
| 1293.667 | 3 | 0 | 0 | 0.695453 | FALSE | 0 SAMD8     | 5627698 | 0.40791  |
| 1217.333 | 3 | 0 | 0 | 0.686667 | FALSE | 0 SCARB2    | 4856064 | 0.401961 |
| 1243     | 3 | 0 | 0 | 0.689862 | FALSE | 0 SERINC3   | 5148782 | 0.403509 |
| 1034.667 | 3 | 0 | 0 | 0.66467  | FALSE | 0 SETD5     | 3349058 | 0.387431 |
| 984.6667 | 3 | 0 | 0 | 0.658218 | FALSE | 0 SH3BP4    | 3668982 | 0.383795 |
| 1174.333 | 3 | 0 | 0 | 0.685438 | FALSE | 0 SIX4      | 4740390 | 0.39033  |
| 725.6667 | 3 | 0 | 0 | 0.624178 | FALSE | 0 SLC23A2   | 2005128 | 0.36071  |
| 984.6667 | 3 | 0 | 0 | 0.658218 | FALSE | 0 SLC7A1    | 3668982 | 0.383795 |
| 865.3333 | 3 | 0 | 0 | 0.643103 | FALSE | 0 SMAD2     | 2788758 | 0.37304  |
| 1174.333 | 3 | 0 | 0 | 0.685438 | FALSE | 0 SMARCA5   | 4740390 | 0.39033  |
| 1293.667 | 3 | 0 | 0 | 0.695453 | FALSE | 0 SMIM13    | 5627698 | 0.40791  |
| 844.6667 | 3 | 0 | 0 | 0.619508 | FALSE | 0 SNRNP27   | 2088450 | 0.436455 |
| 1217.333 | 3 | 0 | 0 | 0.686667 | FALSE | 0 SOX11     | 4856064 | 0.401961 |
| 1084.333 | 3 | 0 | 0 | 0.670015 | FALSE | 0 STX16     | 3280192 | 0.393224 |
| 734      | 3 | 0 | 0 | 0.625653 | FALSE | 0 SURF4     | 1723850 | 0.360551 |
| 908.3333 | 3 | 0 | 0 | 0.649063 | FALSE | 0 TANK      | 3145870 | 0.375863 |
| 1174.333 | 3 | 0 | 0 | 0.685438 | FALSE | 0 TGIF1     | 4740390 | 0.39033  |
| 697.6667 | 3 | 0 | 0 | 0.61828  | FALSE | 0 TGIF2     | 1495292 | 0.364175 |
| 1293.667 | 3 | 0 | 0 | 0.695453 | FALSE | 0 TGOLN2    | 5627698 | 0.40791  |
| 916      | 3 | 0 | 0 | 0.652074 | FALSE | 0 TIMM8A    | 3322554 | 0.371498 |
| 830.6667 | 3 | 0 | 0 | 0.637757 | FALSE | 0 TJP1      | 2514838 | 0.372048 |
| 1165.333 | 3 | 0 | 0 | 0.679724 | FALSE | 0 TM9SF3    | 4233224 | 0.399702 |
| 984.6667 | 3 | 0 | 0 | 0.658218 | FALSE | 0 TMEM179f  | 3668982 | 0.383795 |
| 784.6667 | 3 | 0 | 0 | 0.632473 | FALSE | 0 TMEM33    | 1940560 | 0.365516 |
| 826      | 3 | 0 | 0 | 0.636221 | FALSE | 0 TMPO      | 2240750 | 0.37415  |
| 1084.333 | 3 | 0 | 0 | 0.670015 | FALSE | 0 TNKS      | 3280192 | 0.393224 |
| 1293.667 | 3 | 0 | 0 | 0.695453 | FALSE | 0 TNRC6B    | 5627698 | 0.40791  |
| 856.3333 | 3 | 0 | 0 | 0.640952 | FALSE | 0 TOB1      | 2673652 | 0.374817 |
| 826      | 3 | 0 | 0 | 0.636221 | FALSE | 0 TRIM71    | 2240750 | 0.37415  |

|          |   |   |   |          |       |           |         |          |
|----------|---|---|---|----------|-------|-----------|---------|----------|
| 856.3333 | 3 | 0 | 0 | 0.640952 | FALSE | 0 TSN     | 2673652 | 0.374817 |
| 676.3333 | 3 | 0 | 0 | 0.616252 | FALSE | 0 TSPAN3  | 1326306 | 0.35922  |
| 907      | 3 | 0 | 0 | 0.647957 | FALSE | 0 TTYH3   | 3004952 | 0.37813  |
| 714.6667 | 3 | 0 | 0 | 0.623379 | FALSE | 0 TVP23C  | 1872646 | 0.357548 |
| 714.6667 | 3 | 0 | 0 | 0.623379 | FALSE | 0 TXNDC16 | 1872646 | 0.357548 |
| 1165.333 | 3 | 0 | 0 | 0.679724 | FALSE | 0 UBAC2   | 4233224 | 0.399702 |
| 1243     | 3 | 0 | 0 | 0.689862 | FALSE | 0 UBE2A   | 5148782 | 0.403509 |
| 1217.333 | 3 | 0 | 0 | 0.686667 | FALSE | 0 UGCG    | 4856064 | 0.401961 |
| 856.3333 | 3 | 0 | 0 | 0.640952 | FALSE | 0 USP22   | 2673652 | 0.374817 |
| 1243     | 3 | 0 | 0 | 0.689862 | FALSE | 0 VAPB    | 5148782 | 0.403509 |
| 865.3333 | 3 | 0 | 0 | 0.643103 | FALSE | 0 VEGFA   | 2788758 | 0.37304  |
| 907      | 3 | 0 | 0 | 0.647957 | FALSE | 0 VEZT    | 3004952 | 0.37813  |
| 844.6667 | 3 | 0 | 0 | 0.619508 | FALSE | 0 WDR36   | 2088450 | 0.436455 |
| 839.6667 | 3 | 0 | 0 | 0.642304 | FALSE | 0 WSB1    | 2829228 | 0.364005 |
| 1018     | 3 | 0 | 0 | 0.662704 | FALSE | 0 WTAP    | 2536618 | 0.385812 |
| 830.6667 | 3 | 0 | 0 | 0.637757 | FALSE | 0 ZBED4   | 2514838 | 0.372048 |
| 959      | 3 | 0 | 0 | 0.6549   | FALSE | 0 ZC3H11A | 3451466 | 0.381825 |
| 714.6667 | 3 | 0 | 0 | 0.623379 | FALSE | 0 ZDHHC24 | 1872646 | 0.357548 |
| 749.6667 | 3 | 0 | 0 | 0.626022 | FALSE | 0 ZEB1    | 1829816 | 0.367173 |
| 830.6667 | 3 | 0 | 0 | 0.637757 | FALSE | 0 ZEB2    | 2514838 | 0.372048 |
| 1293.667 | 3 | 0 | 0 | 0.695453 | FALSE | 0 ZFHX3   | 5627698 | 0.40791  |
| 733.6667 | 3 | 0 | 0 | 0.6251   | FALSE | 0 ZFP36L2 | 1676232 | 0.361989 |
| 1077.667 | 3 | 0 | 0 | 0.670753 | FALSE | 0 ZFP91   | 3544318 | 0.38911  |
| 844.6667 | 3 | 0 | 0 | 0.619508 | FALSE | 0 ZNF197  | 2088450 | 0.436455 |
| 844.6667 | 3 | 0 | 0 | 0.619508 | FALSE | 0 ZNF24   | 2088450 | 0.436455 |
| 844.6667 | 3 | 0 | 0 | 0.619508 | FALSE | 0 ZNF260  | 2088450 | 0.436455 |
| 1084.333 | 3 | 0 | 0 | 0.670015 | FALSE | 0 ZNF430  | 3280192 | 0.393224 |
| 1293.667 | 3 | 0 | 0 | 0.695453 | FALSE | 0 ZNF618  | 5627698 | 0.40791  |
| 856.3333 | 3 | 0 | 0 | 0.640952 | FALSE | 0 ZNF623  | 2673652 | 0.374817 |
| 916      | 3 | 0 | 0 | 0.652074 | FALSE | 0 ZSCAN22 | 3322554 | 0.371498 |
| 811.6667 | 3 | 0 | 0 | 0.641014 | FALSE | 0 ABCB7   | 2249956 | 0.355088 |
| 564      | 3 | 0 | 0 | 0.575207 | FALSE | 0 ABHD17B | 1049764 | 0.464521 |
| 488      | 3 | 0 | 0 | 0.586636 | FALSE | 0 ALDH9A1 | 1202156 | 0.348355 |
| 564      | 3 | 0 | 0 | 0.575207 | FALSE | 0 AVL9    | 1049764 | 0.464521 |
| 884.6667 | 3 | 0 | 0 | 0.651582 | FALSE | 0 BMP3    | 2826254 | 0.359946 |
| 350.6667 | 3 | 0 | 0 | 0.563779 | FALSE | 0 CACNG8  | 526600  | 0.340806 |
| 678.3333 | 3 | 0 | 0 | 0.615822 | FALSE | 0 CD28    | 2074460 | 0.36163  |
| 811.6667 | 3 | 0 | 0 | 0.641014 | FALSE | 0 CNBP    | 2249956 | 0.355088 |
| 564      | 3 | 0 | 0 | 0.575207 | FALSE | 0 DNAJB4  | 1049764 | 0.464521 |
| 564      | 3 | 0 | 0 | 0.575207 | FALSE | 0 EVC     | 1049764 | 0.464521 |
| 488      | 3 | 0 | 0 | 0.586636 | FALSE | 0 FUS     | 1202156 | 0.348355 |
| 294.3333 | 3 | 0 | 0 | 0.551121 | FALSE | 0 GJC1    | 533196  | 0.357724 |
| 427.3333 | 3 | 0 | 0 | 0.576252 | FALSE | 0 GK5     | 794398  | 0.346894 |
| 495.6667 | 3 | 0 | 0 | 0.588233 | FALSE | 0 GLG1    | 1274464 | 0.347378 |
| 502.6667 | 3 | 0 | 0 | 0.587803 | FALSE | 0 GNS     | 1163782 | 0.354034 |
| 453.3333 | 3 | 0 | 0 | 0.581536 | FALSE | 0 HP1BP3  | 912672  | 0.34398  |
| 399      | 3 | 0 | 0 | 0.571951 | FALSE | 0 IFIT3   | 706366  | 0.343399 |

|          |   |   |   |          |       |            |         |          |
|----------|---|---|---|----------|-------|------------|---------|----------|
| 410.3333 | 3 | 0 | 0 | 0.573118 | FALSE | 0 IFNLR1   | 871226  | 0.347482 |
| 884.6667 | 3 | 0 | 0 | 0.651582 | FALSE | 0 KATNAL1  | 2826254 | 0.359946 |
| 276.6667 | 3 | 0 | 0 | 0.547926 | FALSE | 0 KIF18B   | 303294  | 0.358941 |
| 1013     | 3 | 0 | 0 | 0.668725 | FALSE | 0 KLHL11   | 3890034 | 0.370154 |
| 751      | 3 | 0 | 0 | 0.63321  | FALSE | 0 LIN9     | 1691110 | 0.347866 |
| 553.3333 | 3 | 0 | 0 | 0.595484 | FALSE | 0 LIX1L    | 1311930 | 0.358193 |
| 884.6667 | 3 | 0 | 0 | 0.651582 | FALSE | 0 MIGA1    | 2826254 | 0.359946 |
| 884.6667 | 3 | 0 | 0 | 0.651582 | FALSE | 0 PABPC1   | 2826254 | 0.359946 |
| 962.3333 | 3 | 0 | 0 | 0.662765 | FALSE | 0 PHF12    | 3527034 | 0.364556 |
| 502.6667 | 3 | 0 | 0 | 0.587803 | FALSE | 0 PRPS1    | 1163782 | 0.354034 |
| 564      | 3 | 0 | 0 | 0.575207 | FALSE | 0 RGS9BP   | 1049764 | 0.464521 |
| 564      | 3 | 0 | 0 | 0.575207 | FALSE | 0 RHPN2    | 1049764 | 0.464521 |
| 811.6667 | 3 | 0 | 0 | 0.641014 | FALSE | 0 S1PR2    | 2249956 | 0.355088 |
| 469      | 3 | 0 | 0 | 0.583748 | FALSE | 0 SH2B3    | 1030942 | 0.34641  |
| 410.3333 | 3 | 0 | 0 | 0.573118 | FALSE | 0 SHOC2    | 871226  | 0.347482 |
| 416.3333 | 3 | 0 | 0 | 0.575207 | FALSE | 0 SRPX2    | 784294  | 0.342684 |
| 425      | 3 | 0 | 0 | 0.574101 | FALSE | 0 SSBP2    | 854298  | 0.355109 |
| 811.6667 | 3 | 0 | 0 | 0.641014 | FALSE | 0 TANGO2   | 2249956 | 0.355088 |
| 545.3333 | 3 | 0 | 0 | 0.59573  | FALSE | 0 TFDP2    | 1259370 | 0.352091 |
| 469      | 3 | 0 | 0 | 0.583748 | FALSE | 0 TMEM170A | 1030942 | 0.34641  |
| 462.3333 | 3 | 0 | 0 | 0.582335 | FALSE | 0 UBXN2A   | 1107244 | 0.34739  |
| 538.6667 | 3 | 0 | 0 | 0.594501 | FALSE | 0 UHRF1BP1 | 1315730 | 0.352337 |
| 503.6667 | 3 | 0 | 0 | 0.589094 | FALSE | 0 VGLL3    | 993684  | 0.34956  |
| 245      | 3 | 0 | 0 | 0.544977 | FALSE | 0 XKR4     | 417048  | 0.338889 |
| 581.3333 | 3 | 0 | 0 | 0.601997 | FALSE | 0 ZNF43    | 1621528 | 0.352144 |
| 503.6667 | 3 | 0 | 0 | 0.589094 | FALSE | 0 ZNF573   | 993684  | 0.34956  |
| 747      | 3 | 0 | 0 | 0.623134 | FALSE | 0 ABL2     | 2326514 | 0.374498 |
| 683.3333 | 3 | 0 | 0 | 0.592719 | FALSE | 0 AKAP8    | 1439824 | 0.4558   |
| 683.3333 | 3 | 0 | 0 | 0.592719 | FALSE | 0 ALG10B   | 1439824 | 0.4558   |
| 1056     | 3 | 0 | 0 | 0.670077 | FALSE | 0 ANKRD12  | 3993916 | 0.382801 |
| 1056     | 3 | 0 | 0 | 0.670077 | FALSE | 0 AP2B1    | 3993916 | 0.382801 |
| 856.6667 | 3 | 0 | 0 | 0.645192 | FALSE | 0 ARL8B    | 2022300 | 0.363959 |
| 648.6667 | 3 | 0 | 0 | 0.608817 | FALSE | 0 ARPC5    | 1713984 | 0.368202 |
| 1004     | 3 | 0 | 0 | 0.663502 | FALSE | 0 ATXN7L3B | 3487066 | 0.378633 |
| 596.3333 | 3 | 0 | 0 | 0.603164 | FALSE | 0 BBC3     | 1483970 | 0.357129 |
| 1056     | 3 | 0 | 0 | 0.670077 | FALSE | 0 BRAF     | 3993916 | 0.382801 |
| 923      | 3 | 0 | 0 | 0.653671 | FALSE | 0 BTF3L4   | 2700668 | 0.37043  |
| 695      | 3 | 0 | 0 | 0.6149   | FALSE | 0 C11orf68 | 1970286 | 0.37352  |
| 695      | 3 | 0 | 0 | 0.6149   | FALSE | 0 CALM3    | 1970286 | 0.37352  |
| 683.3333 | 3 | 0 | 0 | 0.592719 | FALSE | 0 CCDC117  | 1439824 | 0.4558   |
| 683.3333 | 3 | 0 | 0 | 0.592719 | FALSE | 0 CD84     | 1439824 | 0.4558   |
| 683.3333 | 3 | 0 | 0 | 0.592719 | FALSE | 0 CDC25B   | 1439824 | 0.4558   |
| 683.3333 | 3 | 0 | 0 | 0.592719 | FALSE | 0 CDC73    | 1439824 | 0.4558   |
| 669.3333 | 3 | 0 | 0 | 0.612074 | FALSE | 0 CDK4     | 1864268 | 0.368837 |
| 1081.667 | 3 | 0 | 0 | 0.673702 | FALSE | 0 CHERP    | 4233838 | 0.383896 |
| 564.3333 | 3 | 0 | 0 | 0.596897 | FALSE | 0 CHPF2    | 1434400 | 0.359957 |
| 1056     | 3 | 0 | 0 | 0.670077 | FALSE | 0 COL3A1   | 3993916 | 0.382801 |



|          |   |   |   |          |       |            |         |          |
|----------|---|---|---|----------|-------|------------|---------|----------|
| 1035.333 | 3 | 0 | 0 | 0.66553  | FALSE | 0 CREB3L2  | 3646022 | 0.385657 |
| 1081.667 | 3 | 0 | 0 | 0.673702 | FALSE | 0 CREBRF   | 4233838 | 0.383896 |
| 614      | 3 | 0 | 0 | 0.604086 | FALSE | 0 CRTC3    | 1453532 | 0.364447 |
| 421.6667 | 3 | 0 | 0 | 0.575822 | FALSE | 0 DNTTIP2  | 622860  | 0.344244 |
| 1056     | 3 | 0 | 0 | 0.670077 | FALSE | 0 FAM46C   | 3993916 | 0.382801 |
| 1081.667 | 3 | 0 | 0 | 0.673702 | FALSE | 0 FGFR1OP  | 4233838 | 0.383896 |
| 747      | 3 | 0 | 0 | 0.623134 | FALSE | 0 FSCN1    | 2326514 | 0.374498 |
| 572.6667 | 3 | 0 | 0 | 0.598433 | FALSE | 0 GJD2     | 1207196 | 0.359539 |
| 1004     | 3 | 0 | 0 | 0.663502 | FALSE | 0 GNB2L1   | 3487066 | 0.378633 |
| 683.3333 | 3 | 0 | 0 | 0.592719 | FALSE | 0 HAAO     | 1439824 | 0.4558   |
| 683.3333 | 3 | 0 | 0 | 0.592719 | FALSE | 0 HYOU1    | 1439824 | 0.4558   |
| 581.6667 | 3 | 0 | 0 | 0.599846 | FALSE | 0 IGFBP5   | 1482586 | 0.359992 |
| 1056     | 3 | 0 | 0 | 0.670077 | FALSE | 0 IRS1     | 3993916 | 0.382801 |
| 683.3333 | 3 | 0 | 0 | 0.592719 | FALSE | 0 ISG20L2  | 1439824 | 0.4558   |
| 1056     | 3 | 0 | 0 | 0.670077 | FALSE | 0 ITGB1    | 3993916 | 0.382801 |
| 1056     | 3 | 0 | 0 | 0.670077 | FALSE | 0 IVNS1ABP | 3993916 | 0.382801 |
| 1004     | 3 | 0 | 0 | 0.663502 | FALSE | 0 JARID2   | 3487066 | 0.378633 |
| 695      | 3 | 0 | 0 | 0.6149   | FALSE | 0 KMT2D    | 1970286 | 0.37352  |
| 561      | 3 | 0 | 0 | 0.595975 | FALSE | 0 LIMK1    | 1331060 | 0.36129  |
| 683.3333 | 3 | 0 | 0 | 0.592719 | FALSE | 0 MOB1A    | 1439824 | 0.4558   |
| 407.3333 | 3 | 0 | 0 | 0.573057 | FALSE | 0 NLGN2    | 612256  | 0.345228 |
| 683.3333 | 3 | 0 | 0 | 0.592719 | FALSE | 0 NUP153   | 1439824 | 0.4558   |
| 1004     | 3 | 0 | 0 | 0.663502 | FALSE | 0 PACS1    | 3487066 | 0.378633 |
| 1081.667 | 3 | 0 | 0 | 0.673702 | FALSE | 0 PAFAH1B2 | 4233838 | 0.383896 |
| 648.6667 | 3 | 0 | 0 | 0.608817 | FALSE | 0 PDGFRA   | 1713984 | 0.368202 |
| 683.3333 | 3 | 0 | 0 | 0.592719 | FALSE | 0 PDP1     | 1439824 | 0.4558   |
| 1081.667 | 3 | 0 | 0 | 0.673702 | FALSE | 0 PLAU     | 4233838 | 0.383896 |
| 1081.667 | 3 | 0 | 0 | 0.673702 | FALSE | 0 PROSER1  | 4233838 | 0.383896 |
| 1056     | 3 | 0 | 0 | 0.670077 | FALSE | 0 PTP4A1   | 3993916 | 0.382801 |
| 870.3333 | 3 | 0 | 0 | 0.647097 | FALSE | 0 RICTOR   | 2231978 | 0.364959 |
| 931      | 3 | 0 | 0 | 0.656621 | FALSE | 0 RNF125   | 2933380 | 0.366575 |
| 669.3333 | 3 | 0 | 0 | 0.612074 | FALSE | 0 SERPINE1 | 1864268 | 0.368837 |
| 1056     | 3 | 0 | 0 | 0.670077 | FALSE | 0 SON      | 3993916 | 0.382801 |
| 747      | 3 | 0 | 0 | 0.623134 | FALSE | 0 SPTBN1   | 2326514 | 0.374498 |
| 683.3333 | 3 | 0 | 0 | 0.592719 | FALSE | 0 SRSF11   | 1439824 | 0.4558   |
| 726.3333 | 3 | 0 | 0 | 0.619816 | FALSE | 0 STRAP    | 2142354 | 0.374269 |
| 683.3333 | 3 | 0 | 0 | 0.592719 | FALSE | 0 TCF20    | 1439824 | 0.4558   |
| 1038.667 | 3 | 0 | 0 | 0.66725  | FALSE | 0 TLR2     | 3758722 | 0.382903 |
| 873.3333 | 3 | 0 | 0 | 0.647465 | FALSE | 0 TMED2    | 2735538 | 0.365299 |
| 683.3333 | 3 | 0 | 0 | 0.592719 | FALSE | 0 TMEM101  | 1439824 | 0.4558   |
| 683.3333 | 3 | 0 | 0 | 0.592719 | FALSE | 0 TMEM214  | 1439824 | 0.4558   |
| 1004     | 3 | 0 | 0 | 0.663502 | FALSE | 0 TMEM245  | 3487066 | 0.378633 |
| 870.3333 | 3 | 0 | 0 | 0.647097 | FALSE | 0 TMEM248  | 2231978 | 0.364959 |
| 1056     | 3 | 0 | 0 | 0.670077 | FALSE | 0 TNFAIP3  | 3993916 | 0.382801 |
| 596.3333 | 3 | 0 | 0 | 0.603164 | FALSE | 0 TPM3     | 1483970 | 0.357129 |
| 683.3333 | 3 | 0 | 0 | 0.592719 | FALSE | 0 USP54    | 1439824 | 0.4558   |
| 1081.667 | 3 | 0 | 0 | 0.673702 | FALSE | 0 ZBTB37   | 4233838 | 0.383896 |

|          |   |   |   |          |       |            |         |          |
|----------|---|---|---|----------|-------|------------|---------|----------|
| 916.3333 | 3 | 0 | 0 | 0.65318  | FALSE | 0 ZFAND5   | 2871710 | 0.368937 |
| 1004     | 3 | 0 | 0 | 0.663502 | FALSE | 0 ZMYND11  | 3487066 | 0.378633 |
| 572.3333 | 3 | 0 | 0 | 0.597819 | FALSE | 0 ZNF281   | 1169166 | 0.361603 |
| 521      | 3 | 0 | 0 | 0.59063  | FALSE | 0 ZNF426   | 1063042 | 0.355434 |
| 432.3333 | 3 | 0 | 0 | 0.55192  | FALSE | 0 CDC23    | 262368  | 0.517807 |
| 805      | 3 | 0 | 0 | 0.637204 | FALSE | 0 COL1A2   | 1783734 | 0.361999 |
| 805      | 3 | 0 | 0 | 0.637204 | FALSE | 0 FN1      | 1783734 | 0.361999 |
| 805      | 3 | 0 | 0 | 0.637204 | FALSE | 0 GDA      | 1783734 | 0.361999 |
| 287.6667 | 3 | 0 | 0 | 0.551183 | FALSE | 0 GLUD2    | 413100  | 0.349168 |
| 784.3333 | 3 | 0 | 0 | 0.63278  | FALSE | 0 MACF1    | 1532624 | 0.364511 |
| 296.6667 | 3 | 0 | 0 | 0.554132 | FALSE | 0 OGT      | 231296  | 0.340238 |
| 278.6667 | 3 | 0 | 0 | 0.550261 | FALSE | 0 POTES    | 392042  | 0.3445   |
| 805      | 3 | 0 | 0 | 0.637204 | FALSE | 0 SLC6A8   | 1783734 | 0.361999 |
| 356.3333 | 3 | 0 | 0 | 0.563717 | FALSE | 0 SOD2     | 562872  | 0.346667 |
| 784.3333 | 3 | 0 | 0 | 0.63278  | FALSE | 0 TPM1     | 1532624 | 0.364511 |
| 432.3333 | 3 | 0 | 0 | 0.55192  | FALSE | 0 ZC3H10   | 262368  | 0.517807 |
| 418.6667 | 3 | 0 | 0 | 0.57361  | FALSE | 0 APOPT1   | 714492  | 0.352164 |
| 805.3333 | 3 | 0 | 0 | 0.638003 | FALSE | 0 BMP2     | 1836976 | 0.360042 |
| 927.6667 | 3 | 0 | 0 | 0.653364 | FALSE | 0 CAV1     | 2901150 | 0.373054 |
| 927.6667 | 3 | 0 | 0 | 0.653364 | FALSE | 0 CCPG1    | 2901150 | 0.373054 |
| 797      | 3 | 0 | 0 | 0.636406 | FALSE | 0 CUL5     | 2212750 | 0.360507 |
| 537.6667 | 3 | 0 | 0 | 0.59278  | FALSE | 0 DDI2     | 1195318 | 0.358255 |
| 618.6667 | 3 | 0 | 0 | 0.603779 | FALSE | 0 DLC1     | 1632892 | 0.368316 |
| 607      | 3 | 0 | 0 | 0.581229 | FALSE | 0 ERFF1    | 1158816 | 0.462595 |
| 607      | 3 | 0 | 0 | 0.581229 | FALSE | 0 FLI1     | 1158816 | 0.462595 |
| 337.3333 | 3 | 0 | 0 | 0.561137 | FALSE | 0 FOXK1    | 640628  | 0.34215  |
| 805.3333 | 3 | 0 | 0 | 0.638003 | FALSE | 0 LARP1    | 1836976 | 0.360042 |
| 1005.333 | 3 | 0 | 0 | 0.66381  | FALSE | 0 LDLR     | 3614924 | 0.378423 |
| 470.3333 | 3 | 0 | 0 | 0.582581 | FALSE | 0 LYPLA2   | 918786  | 0.352352 |
| 927.6667 | 3 | 0 | 0 | 0.653364 | FALSE | 0 MYC      | 2901150 | 0.373054 |
| 407.3333 | 3 | 0 | 0 | 0.571582 | FALSE | 0 PDGFRB   | 675374  | 0.352414 |
| 607      | 3 | 0 | 0 | 0.581229 | FALSE | 0 PLEKHM1  | 1158816 | 0.462595 |
| 618.6667 | 3 | 0 | 0 | 0.603779 | FALSE | 0 PODXL    | 1632892 | 0.368316 |
| 607      | 3 | 0 | 0 | 0.581229 | FALSE | 0 PSMD3    | 1158816 | 0.462595 |
| 927.6667 | 3 | 0 | 0 | 0.653364 | FALSE | 0 RNF24    | 2901150 | 0.373054 |
| 607      | 3 | 0 | 0 | 0.581229 | FALSE | 0 SERPINB9 | 1158816 | 0.462595 |
| 840      | 3 | 0 | 0 | 0.642734 | FALSE | 0 SIPA1L1  | 2384916 | 0.363046 |
| 607      | 3 | 0 | 0 | 0.581229 | FALSE | 0 SLC26A2  | 1158816 | 0.462595 |
| 575.6667 | 3 | 0 | 0 | 0.598433 | FALSE | 0 SOX2     | 1465894 | 0.361426 |
| 1005.333 | 3 | 0 | 0 | 0.66381  | FALSE | 0 SREBF1   | 3614924 | 0.378423 |
| 607      | 3 | 0 | 0 | 0.581229 | FALSE | 0 STAT1    | 1158816 | 0.462595 |
| 319.6667 | 3 | 0 | 0 | 0.557757 | FALSE | 0 STAT3    | 483472  | 0.343391 |
| 1005.333 | 3 | 0 | 0 | 0.66381  | FALSE | 0 TACC1    | 3614924 | 0.378423 |
| 607      | 3 | 0 | 0 | 0.581229 | FALSE | 0 UTP15    | 1158816 | 0.462595 |
| 319.6667 | 3 | 0 | 0 | 0.558433 | FALSE | 0 YES1     | 473672  | 0.339368 |
| 607      | 3 | 0 | 0 | 0.581229 | FALSE | 0 ZBTB33   | 1158816 | 0.462595 |
| 927.6667 | 3 | 0 | 0 | 0.653364 | FALSE | 0 ZNF644   | 2901150 | 0.373054 |

|          |   |   |   |          |       |            |         |          |
|----------|---|---|---|----------|-------|------------|---------|----------|
| 927.6667 | 3 | 0 | 0 | 0.653364 | FALSE | 0 ZNF772   | 2901150 | 0.373054 |
| 607      | 3 | 0 | 0 | 0.581229 | FALSE | 0 ZSWIM4   | 1158816 | 0.462595 |
| 406.6667 | 3 | 0 | 0 | 0.547865 | FALSE | 0 ABL1     | 216394  | 0.5289   |
| 632.6667 | 3 | 0 | 0 | 0.584854 | FALSE | 0 ACTL6A   | 1251182 | 0.461407 |
| 474      | 3 | 0 | 0 | 0.559232 | FALSE | 0 ADD1     | 485368  | 0.496849 |
| 941.6667 | 3 | 0 | 0 | 0.635177 | FALSE | 0 AEN      | 2390876 | 0.429921 |
| 941.6667 | 3 | 0 | 0 | 0.635177 | FALSE | 0 AP3S2    | 2390876 | 0.429921 |
| 941.6667 | 3 | 0 | 0 | 0.635177 | FALSE | 0 ATP11B   | 2390876 | 0.429921 |
| 632.6667 | 3 | 0 | 0 | 0.584854 | FALSE | 0 ATP5G2   | 1251182 | 0.461407 |
| 632.6667 | 3 | 0 | 0 | 0.584854 | FALSE | 0 BAZ1A    | 1251182 | 0.461407 |
| 941.6667 | 3 | 0 | 0 | 0.635177 | FALSE | 0 BCL7B    | 2390876 | 0.429921 |
| 941.6667 | 3 | 0 | 0 | 0.635177 | FALSE | 0 BRK1     | 2390876 | 0.429921 |
| 632.6667 | 3 | 0 | 0 | 0.584854 | FALSE | 0 BRMS1L   | 1251182 | 0.461407 |
| 632.6667 | 3 | 0 | 0 | 0.584854 | FALSE | 0 BTN2A2   | 1251182 | 0.461407 |
| 941.6667 | 3 | 0 | 0 | 0.635177 | FALSE | 0 C12orf4  | 2390876 | 0.429921 |
| 941.6667 | 3 | 0 | 0 | 0.635177 | FALSE | 0 C17orf51 | 2390876 | 0.429921 |
| 941.6667 | 3 | 0 | 0 | 0.635177 | FALSE | 0 C1RL     | 2390876 | 0.429921 |
| 941.6667 | 3 | 0 | 0 | 0.635177 | FALSE | 0 CALU     | 2390876 | 0.429921 |
| 482      | 3 | 0 | 0 | 0.560891 | FALSE | 0 CARD8    | 570134  | 0.491318 |
| 941.6667 | 3 | 0 | 0 | 0.635177 | FALSE | 0 CCNB1    | 2390876 | 0.429921 |
| 555      | 3 | 0 | 0 | 0.572197 | FALSE | 0 CDS2     | 878120  | 0.476354 |
| 941.6667 | 3 | 0 | 0 | 0.635177 | FALSE | 0 CHMP4B   | 2390876 | 0.429921 |
| 482      | 3 | 0 | 0 | 0.560891 | FALSE | 0 CLASP1   | 570134  | 0.491318 |
| 941.6667 | 3 | 0 | 0 | 0.635177 | FALSE | 0 CMC2     | 2390876 | 0.429921 |
| 632.6667 | 3 | 0 | 0 | 0.584854 | FALSE | 0 CYBRD1   | 1251182 | 0.461407 |
| 941.6667 | 3 | 0 | 0 | 0.635177 | FALSE | 0 DCUN1D4  | 2390876 | 0.429921 |
| 941.6667 | 3 | 0 | 0 | 0.635177 | FALSE | 0 DDHD1    | 2390876 | 0.429921 |
| 941.6667 | 3 | 0 | 0 | 0.635177 | FALSE | 0 DKC1     | 2390876 | 0.429921 |
| 941.6667 | 3 | 0 | 0 | 0.635177 | FALSE | 0 EDARADD  | 2390876 | 0.429921 |
| 988      | 3 | 0 | 0 | 0.661413 | FALSE | 0 ELAVL1   | 3384684 | 0.377438 |
| 941.6667 | 3 | 0 | 0 | 0.635177 | FALSE | 0 GART     | 2390876 | 0.429921 |
| 632.6667 | 3 | 0 | 0 | 0.584854 | FALSE | 0 GNAI2    | 1251182 | 0.461407 |
| 421.3333 | 3 | 0 | 0 | 0.550261 | FALSE | 0 GPRIN2   | 245792  | 0.521505 |
| 941.6667 | 3 | 0 | 0 | 0.635177 | FALSE | 0 HM13     | 2390876 | 0.429921 |
| 988      | 3 | 0 | 0 | 0.661413 | FALSE | 0 IFITM1   | 3384684 | 0.377438 |
| 632.6667 | 3 | 0 | 0 | 0.584854 | FALSE | 0 IGF2BP1  | 1251182 | 0.461407 |
| 941.6667 | 3 | 0 | 0 | 0.635177 | FALSE | 0 IL1RAP   | 2390876 | 0.429921 |
| 407.6667 | 3 | 0 | 0 | 0.548111 | FALSE | 0 ING3     | 145162  | 0.527454 |
| 555      | 3 | 0 | 0 | 0.572197 | FALSE | 0 KBTBD6   | 878120  | 0.476354 |
| 941.6667 | 3 | 0 | 0 | 0.635177 | FALSE | 0 KLHL20   | 2390876 | 0.429921 |
| 941.6667 | 3 | 0 | 0 | 0.635177 | FALSE | 0 KLHL42   | 2390876 | 0.429921 |
| 474      | 3 | 0 | 0 | 0.559232 | FALSE | 0 LATS1    | 485368  | 0.496849 |
| 555      | 3 | 0 | 0 | 0.572197 | FALSE | 0 LIMD2    | 878120  | 0.476354 |
| 941.6667 | 3 | 0 | 0 | 0.635177 | FALSE | 0 LMTK2    | 2390876 | 0.429921 |
| 941.6667 | 3 | 0 | 0 | 0.635177 | FALSE | 0 LSM4     | 2390876 | 0.429921 |
| 555      | 3 | 0 | 0 | 0.572197 | FALSE | 0 MAML1    | 878120  | 0.476354 |
| 941.6667 | 3 | 0 | 0 | 0.635177 | FALSE | 0 MAPRE3   | 2390876 | 0.429921 |

|          |   |   |   |          |       |   |          |         |          |
|----------|---|---|---|----------|-------|---|----------|---------|----------|
| 941.6667 | 3 | 0 | 0 | 0.635177 | FALSE | 0 | MDFIC    | 2390876 | 0.429921 |
| 941.6667 | 3 | 0 | 0 | 0.635177 | FALSE | 0 | MID1     | 2390876 | 0.429921 |
| 941.6667 | 3 | 0 | 0 | 0.635177 | FALSE | 0 | NACC2    | 2390876 | 0.429921 |
| 941.6667 | 3 | 0 | 0 | 0.635177 | FALSE | 0 | NCAPG2   | 2390876 | 0.429921 |
| 941.6667 | 3 | 0 | 0 | 0.635177 | FALSE | 0 | NF1      | 2390876 | 0.429921 |
| 555      | 3 | 0 | 0 | 0.572197 | FALSE | 0 | NFE2L1   | 878120  | 0.476354 |
| 467.3333 | 3 | 0 | 0 | 0.557942 | FALSE | 0 | NSL1     | 570750  | 0.500895 |
| 941.6667 | 3 | 0 | 0 | 0.635177 | FALSE | 0 | NUPL1    | 2390876 | 0.429921 |
| 941.6667 | 3 | 0 | 0 | 0.635177 | FALSE | 0 | OTUD1    | 2390876 | 0.429921 |
| 421.3333 | 3 | 0 | 0 | 0.550261 | FALSE | 0 | PAPD5    | 245792  | 0.521505 |
| 941.6667 | 3 | 0 | 0 | 0.635177 | FALSE | 0 | PARD6B   | 2390876 | 0.429921 |
| 941.6667 | 3 | 0 | 0 | 0.635177 | FALSE | 0 | PDS5A    | 2390876 | 0.429921 |
| 482      | 3 | 0 | 0 | 0.560891 | FALSE | 0 | PLEKHG5  | 570134  | 0.491318 |
| 632.6667 | 3 | 0 | 0 | 0.584854 | FALSE | 0 | POLR2E   | 1251182 | 0.461407 |
| 467.3333 | 3 | 0 | 0 | 0.557942 | FALSE | 0 | POU3F1   | 570750  | 0.500895 |
| 941.6667 | 3 | 0 | 0 | 0.635177 | FALSE | 0 | PPP2R4   | 2390876 | 0.429921 |
| 941.6667 | 3 | 0 | 0 | 0.635177 | FALSE | 0 | PTAR1    | 2390876 | 0.429921 |
| 941.6667 | 3 | 0 | 0 | 0.635177 | FALSE | 0 | PWP2     | 2390876 | 0.429921 |
| 941.6667 | 3 | 0 | 0 | 0.635177 | FALSE | 0 | RAB18    | 2390876 | 0.429921 |
| 482      | 3 | 0 | 0 | 0.560891 | FALSE | 0 | RHBDD1   | 570134  | 0.491318 |
| 941.6667 | 3 | 0 | 0 | 0.635177 | FALSE | 0 | RPS3     | 2390876 | 0.429921 |
| 632.6667 | 3 | 0 | 0 | 0.584854 | FALSE | 0 | SF1      | 1251182 | 0.461407 |
| 941.6667 | 3 | 0 | 0 | 0.635177 | FALSE | 0 | SHCBP1   | 2390876 | 0.429921 |
| 941.6667 | 3 | 0 | 0 | 0.635177 | FALSE | 0 | SLFN11   | 2390876 | 0.429921 |
| 555      | 3 | 0 | 0 | 0.572197 | FALSE | 0 | SPEN     | 878120  | 0.476354 |
| 632.6667 | 3 | 0 | 0 | 0.584854 | FALSE | 0 | STARD7   | 1251182 | 0.461407 |
| 941.6667 | 3 | 0 | 0 | 0.635177 | FALSE | 0 | STAT5B   | 2390876 | 0.429921 |
| 555      | 3 | 0 | 0 | 0.572197 | FALSE | 0 | STC1     | 878120  | 0.476354 |
| 555      | 3 | 0 | 0 | 0.572197 | FALSE | 0 | TFG      | 878120  | 0.476354 |
| 632.6667 | 3 | 0 | 0 | 0.584854 | FALSE | 0 | TMEM164  | 1251182 | 0.461407 |
| 467.3333 | 3 | 0 | 0 | 0.557942 | FALSE | 0 | TRAF6    | 570750  | 0.500895 |
| 941.6667 | 3 | 0 | 0 | 0.635177 | FALSE | 0 | ZNF738   | 2390876 | 0.429921 |
| 941.6667 | 3 | 0 | 0 | 0.635177 | FALSE | 0 | ZNF92    | 2390876 | 0.429921 |
| 389.6667 | 3 | 0 | 0 | 0.568756 | FALSE | 0 | ATXN2L   | 853930  | 0.351099 |
| 984.6667 | 3 | 0 | 0 | 0.65957  | FALSE | 0 | CAMTA1   | 3279106 | 0.380529 |
| 449.6667 | 3 | 0 | 0 | 0.578771 | FALSE | 0 | FBRS     | 790732  | 0.353281 |
| 826      | 3 | 0 | 0 | 0.638802 | FALSE | 0 | FBXO28   | 1919922 | 0.367156 |
| 773.3333 | 3 | 0 | 0 | 0.631429 | FALSE | 0 | TRPS1    | 1503366 | 0.363109 |
| 907      | 3 | 0 | 0 | 0.648756 | FALSE | 0 | ZBTB47   | 2599208 | 0.37609  |
| 872.3333 | 3 | 0 | 0 | 0.647097 | FALSE | 0 | C5orf24  | 2376786 | 0.365799 |
| 606      | 3 | 0 | 0 | 0.609985 | FALSE | 0 | CAB39    | 449530  | 0.34027  |
| 953.3333 | 3 | 0 | 0 | 0.656252 | FALSE | 0 | CDKN1B   | 3082370 | 0.376268 |
| 872.3333 | 3 | 0 | 0 | 0.647097 | FALSE | 0 | DEF8     | 2376786 | 0.365799 |
| 953.3333 | 3 | 0 | 0 | 0.656252 | FALSE | 0 | FICD     | 3082370 | 0.376268 |
| 880.3333 | 3 | 0 | 0 | 0.649923 | FALSE | 0 | HECTD3   | 2595920 | 0.362164 |
| 639.6667 | 3 | 0 | 0 | 0.615207 | FALSE | 0 | HIC1     | 971310  | 0.342816 |
| 745      | 3 | 0 | 0 | 0.628971 | FALSE | 0 | KIAA0907 | 1849908 | 0.356493 |

|          |   |   |   |          |       |   |         |         |          |
|----------|---|---|---|----------|-------|---|---------|---------|----------|
| 822.6667 | 3 | 0 | 0 | 0.640092 | FALSE | 0 | KMT2A   | 2395376 | 0.362287 |
| 865.6667 | 3 | 0 | 0 | 0.646175 | FALSE | 0 | MNT     | 2568824 | 0.365301 |
| 742      | 3 | 0 | 0 | 0.628295 | FALSE | 0 | MTF1    | 1389414 | 0.356936 |
| 953.3333 | 3 | 0 | 0 | 0.656252 | FALSE | 0 | MYH9    | 3082370 | 0.376268 |
| 672.3333 | 3 | 0 | 0 | 0.61957  | FALSE | 0 | NCOA3   | 930462  | 0.347122 |
| 742      | 3 | 0 | 0 | 0.628295 | FALSE | 0 | PCGF2   | 1389414 | 0.356936 |
| 872.3333 | 3 | 0 | 0 | 0.647097 | FALSE | 0 | PRR14L  | 2376786 | 0.365799 |
| 831      | 3 | 0 | 0 | 0.641813 | FALSE | 0 | PRUNE2  | 2023564 | 0.361498 |
| 953.3333 | 3 | 0 | 0 | 0.656252 | FALSE | 0 | PSME3   | 3082370 | 0.376268 |
| 665.6667 | 3 | 0 | 0 | 0.618587 | FALSE | 0 | RACGAP1 | 1042544 | 0.346542 |
| 640.6667 | 3 | 0 | 0 | 0.6149   | FALSE | 0 | REST    | 818670  | 0.344277 |
| 672      | 3 | 0 | 0 | 0.620676 | FALSE | 0 | RHOB    | 1417956 | 0.34375  |
| 794.6667 | 3 | 0 | 0 | 0.636037 | FALSE | 0 | SCD     | 1799072 | 0.36043  |
| 654.3333 | 3 | 0 | 0 | 0.616743 | FALSE | 0 | TBC1D13 | 963838  | 0.346045 |
| 788      | 3 | 0 | 0 | 0.634931 | FALSE | 0 | TNPO2   | 1940374 | 0.360348 |
| 953.3333 | 3 | 0 | 0 | 0.656252 | FALSE | 0 | TPRG1L  | 3082370 | 0.376268 |
| 728.3333 | 3 | 0 | 0 | 0.626575 | FALSE | 0 | VPS37B  | 1218372 | 0.355143 |
| 208      | 3 | 0 | 0 | 0.537972 | FALSE | 0 | RDH11   | 136036  | 0.341584 |
| 207      | 3 | 0 | 0 | 0.537849 | FALSE | 0 | TRPV2   | 176434  | 0.34106  |
| 444.3333 | 3 | 0 | 0 | 0.577174 | FALSE | 0 | MYL6    | 767176  | 0.356377 |
| 479      | 3 | 0 | 0 | 0.582396 | FALSE | 0 | NID1    | 1059100 | 0.359669 |
| 479      | 3 | 0 | 0 | 0.582396 | FALSE | 0 | SLC4A2  | 1059100 | 0.359669 |
| 418.3333 | 3 | 0 | 0 | 0.572627 | FALSE | 0 | VAV3    | 664606  | 0.356695 |
| 187.6667 | 3 | 0 | 0 | 0.534531 | FALSE | 0 | CYP20A1 | 168560  | 0.339394 |
| 186.6667 | 3 | 0 | 0 | 0.534224 | FALSE | 0 | TRIM59  | 191016  | 0.340673 |
| 287.6667 | 3 | 0 | 0 | 0.552289 | FALSE | 0 | U2AF2   | 388442  | 0.341677 |
| 1503.5   | 2 | 0 | 0 | 0.66086  | FALSE | 0 | 11-Sep  | 2301520 | 0.576333 |
| 1040     | 2 | 0 | 0 | 0.619877 | FALSE | 0 | 2-Sep   | 1300766 | 0.535567 |
| 1503.5   | 2 | 0 | 0 | 0.66086  | FALSE | 0 | 7-Mar   | 2301520 | 0.576333 |
| 1503.5   | 2 | 0 | 0 | 0.66086  | FALSE | 0 | 7-Sep   | 2301520 | 0.576333 |
| 1503.5   | 2 | 0 | 0 | 0.66086  | FALSE | 0 | ADNP    | 2301520 | 0.576333 |
| 1040     | 2 | 0 | 0 | 0.619877 | FALSE | 0 | ADO     | 1300766 | 0.535567 |
| 1503.5   | 2 | 0 | 0 | 0.66086  | FALSE | 0 | ADRB1   | 2301520 | 0.576333 |
| 802      | 2 | 0 | 0 | 0.594931 | FALSE | 0 | AEBP2   | 418940  | 0.522164 |
| 1040     | 2 | 0 | 0 | 0.619877 | FALSE | 0 | AGO4    | 1300766 | 0.535567 |
| 802      | 2 | 0 | 0 | 0.594931 | FALSE | 0 | AK6     | 418940  | 0.522164 |
| 1116     | 2 | 0 | 0 | 0.626636 | FALSE | 0 | AKAP11  | 1503526 | 0.543902 |
| 970.5    | 2 | 0 | 0 | 0.612135 | FALSE | 0 | AKT3    | 1000910 | 0.534454 |
| 937      | 2 | 0 | 0 | 0.611705 | FALSE | 0 | ALG14   | 1095258 | 0.517986 |
| 814      | 2 | 0 | 0 | 0.598495 | FALSE | 0 | ANKDD1A | 585500  | 0.510678 |
| 1040     | 2 | 0 | 0 | 0.619877 | FALSE | 0 | ANKFY1  | 1300766 | 0.535567 |
| 1116     | 2 | 0 | 0 | 0.626636 | FALSE | 0 | ANKRD11 | 1503526 | 0.543902 |
| 937      | 2 | 0 | 0 | 0.611705 | FALSE | 0 | ANKRD42 | 1095258 | 0.517986 |
| 1503.5   | 2 | 0 | 0 | 0.66086  | FALSE | 0 | ANLN    | 2301520 | 0.576333 |
| 739.5    | 2 | 0 | 0 | 0.58977  | FALSE | 0 | ANO6    | 228972  | 0.50931  |
| 1040     | 2 | 0 | 0 | 0.619877 | FALSE | 0 | ANP32E  | 1300766 | 0.535567 |
| 792      | 2 | 0 | 0 | 0.595853 | FALSE | 0 | APLP2   | 570406  | 0.510652 |

|        |   |   |   |          |       |            |         |          |
|--------|---|---|---|----------|-------|------------|---------|----------|
| 1503.5 | 2 | 0 | 0 | 0.66086  | FALSE | 0 APP      | 2301520 | 0.576333 |
| 1503.5 | 2 | 0 | 0 | 0.66086  | FALSE | 0 ARAP2    | 2301520 | 0.576333 |
| 1503.5 | 2 | 0 | 0 | 0.66086  | FALSE | 0 AREL1    | 2301520 | 0.576333 |
| 1001.5 | 2 | 0 | 0 | 0.61576  | FALSE | 0 ARF6     | 1165610 | 0.53417  |
| 1503.5 | 2 | 0 | 0 | 0.66086  | FALSE | 0 ARHGAP12 | 2301520 | 0.576333 |
| 1116   | 2 | 0 | 0 | 0.626636 | FALSE | 0 ARHGAP18 | 1503526 | 0.543902 |
| 1503.5 | 2 | 0 | 0 | 0.66086  | FALSE | 0 ARHGAP5  | 2301520 | 0.576333 |
| 1503.5 | 2 | 0 | 0 | 0.66086  | FALSE | 0 ARID1A   | 2301520 | 0.576333 |
| 937    | 2 | 0 | 0 | 0.611705 | FALSE | 0 ARL5A    | 1095258 | 0.517986 |
| 923.5  | 2 | 0 | 0 | 0.607957 | FALSE | 0 ARNTL2   | 884358  | 0.528351 |
| 1040   | 2 | 0 | 0 | 0.619877 | FALSE | 0 ASAP1    | 1300766 | 0.535567 |
| 1116   | 2 | 0 | 0 | 0.626636 | FALSE | 0 ASCC3    | 1503526 | 0.543902 |
| 1116   | 2 | 0 | 0 | 0.626636 | FALSE | 0 ATF7IP   | 1503526 | 0.543902 |
| 1001.5 | 2 | 0 | 0 | 0.61576  | FALSE | 0 ATM      | 1165610 | 0.53417  |
| 1503.5 | 2 | 0 | 0 | 0.66086  | FALSE | 0 ATP2B1   | 2301520 | 0.576333 |
| 1040   | 2 | 0 | 0 | 0.619877 | FALSE | 0 ATP6V1A  | 1300766 | 0.535567 |
| 1503.5 | 2 | 0 | 0 | 0.66086  | FALSE | 0 ATRX     | 2301520 | 0.576333 |
| 1503.5 | 2 | 0 | 0 | 0.66086  | FALSE | 0 ATXN1    | 2301520 | 0.576333 |
| 1116   | 2 | 0 | 0 | 0.626636 | FALSE | 0 ATXN7L3  | 1503526 | 0.543902 |
| 1503.5 | 2 | 0 | 0 | 0.66086  | FALSE | 0 B3GALNT2 | 2301520 | 0.576333 |
| 802    | 2 | 0 | 0 | 0.594931 | FALSE | 0 B4GALT6  | 418940  | 0.522164 |
| 1503.5 | 2 | 0 | 0 | 0.66086  | FALSE | 0 BBX      | 2301520 | 0.576333 |
| 1503.5 | 2 | 0 | 0 | 0.66086  | FALSE | 0 BCL2L11  | 2301520 | 0.576333 |
| 792    | 2 | 0 | 0 | 0.595853 | FALSE | 0 BCL9L    | 570406  | 0.510652 |
| 1040   | 2 | 0 | 0 | 0.619877 | FALSE | 0 BCOR     | 1300766 | 0.535567 |
| 1001.5 | 2 | 0 | 0 | 0.61576  | FALSE | 0 BDP1     | 1165610 | 0.53417  |
| 1503.5 | 2 | 0 | 0 | 0.66086  | FALSE | 0 BIRC6    | 2301520 | 0.576333 |
| 1040   | 2 | 0 | 0 | 0.619877 | FALSE | 0 BMP2K    | 1300766 | 0.535567 |
| 802    | 2 | 0 | 0 | 0.594931 | FALSE | 0 C16orf87 | 418940  | 0.522164 |
| 1503.5 | 2 | 0 | 0 | 0.66086  | FALSE | 0 C21orf91 | 2301520 | 0.576333 |
| 1503.5 | 2 | 0 | 0 | 0.66086  | FALSE | 0 C6orf62  | 2301520 | 0.576333 |
| 1503.5 | 2 | 0 | 0 | 0.66086  | FALSE | 0 CACUL1   | 2301520 | 0.576333 |
| 1040   | 2 | 0 | 0 | 0.619877 | FALSE | 0 CADM1    | 1300766 | 0.535567 |
| 1503.5 | 2 | 0 | 0 | 0.66086  | FALSE | 0 CALM2    | 2301520 | 0.576333 |
| 1503.5 | 2 | 0 | 0 | 0.66086  | FALSE | 0 CAMSAP2  | 2301520 | 0.576333 |
| 1503.5 | 2 | 0 | 0 | 0.66086  | FALSE | 0 CASP3    | 2301520 | 0.576333 |
| 937    | 2 | 0 | 0 | 0.611705 | FALSE | 0 CBFA2T2  | 1095258 | 0.517986 |
| 1040   | 2 | 0 | 0 | 0.619877 | FALSE | 0 CBX4     | 1300766 | 0.535567 |
| 937    | 2 | 0 | 0 | 0.611705 | FALSE | 0 CCDC113  | 1095258 | 0.517986 |
| 814    | 2 | 0 | 0 | 0.598495 | FALSE | 0 CCDC125  | 585500  | 0.510678 |
| 814    | 2 | 0 | 0 | 0.598495 | FALSE | 0 CCNF     | 585500  | 0.510678 |
| 1116   | 2 | 0 | 0 | 0.626636 | FALSE | 0 CCNI     | 1503526 | 0.543902 |
| 814    | 2 | 0 | 0 | 0.598495 | FALSE | 0 CD180    | 585500  | 0.510678 |
| 1503.5 | 2 | 0 | 0 | 0.66086  | FALSE | 0 CD200R1  | 2301520 | 0.576333 |
| 802    | 2 | 0 | 0 | 0.594931 | FALSE | 0 CD2AP    | 418940  | 0.522164 |
| 1503.5 | 2 | 0 | 0 | 0.66086  | FALSE | 0 CD46     | 2301520 | 0.576333 |
| 975.5  | 2 | 0 | 0 | 0.613118 | FALSE | 0 CD86     | 1051910 | 0.532514 |

|        |   |   |   |          |       |   |          |         |          |
|--------|---|---|---|----------|-------|---|----------|---------|----------|
| 1040   | 2 | 0 | 0 | 0.619877 | FALSE | 0 | CDC123   | 1300766 | 0.535567 |
| 814    | 2 | 0 | 0 | 0.598495 | FALSE | 0 | CDC42EP4 | 585500  | 0.510678 |
| 923.5  | 2 | 0 | 0 | 0.607957 | FALSE | 0 | CDC42SE2 | 884358  | 0.528351 |
| 1116   | 2 | 0 | 0 | 0.626636 | FALSE | 0 | CDC7     | 1503526 | 0.543902 |
| 1001.5 | 2 | 0 | 0 | 0.61576  | FALSE | 0 | CDH2     | 1165610 | 0.53417  |
| 1503.5 | 2 | 0 | 0 | 0.66086  | FALSE | 0 | CEP350   | 2301520 | 0.576333 |
| 923.5  | 2 | 0 | 0 | 0.607957 | FALSE | 0 | CERS2    | 884358  | 0.528351 |
| 1503.5 | 2 | 0 | 0 | 0.66086  | FALSE | 0 | CFL2     | 2301520 | 0.576333 |
| 1503.5 | 2 | 0 | 0 | 0.66086  | FALSE | 0 | CGGBP1   | 2301520 | 0.576333 |
| 727.5  | 2 | 0 | 0 | 0.588971 | FALSE | 0 | CHD7     | 451510  | 0.505567 |
| 1040   | 2 | 0 | 0 | 0.619877 | FALSE | 0 | CHMP3    | 1300766 | 0.535567 |
| 1503.5 | 2 | 0 | 0 | 0.66086  | FALSE | 0 | CLASP2   | 2301520 | 0.576333 |
| 802    | 2 | 0 | 0 | 0.594931 | FALSE | 0 | CLDND1   | 418940  | 0.522164 |
| 975.5  | 2 | 0 | 0 | 0.613118 | FALSE | 0 | COPS8    | 1051910 | 0.532514 |
| 1503.5 | 2 | 0 | 0 | 0.66086  | FALSE | 0 | COX10    | 2301520 | 0.576333 |
| 970.5  | 2 | 0 | 0 | 0.612135 | FALSE | 0 | CPSF2    | 1000910 | 0.534454 |
| 970.5  | 2 | 0 | 0 | 0.612135 | FALSE | 0 | CPSF6    | 1000910 | 0.534454 |
| 1116   | 2 | 0 | 0 | 0.626636 | FALSE | 0 | CREBZF   | 1503526 | 0.543902 |
| 740    | 2 | 0 | 0 | 0.590261 | FALSE | 0 | CRK      | 258806  | 0.506859 |
| 1503.5 | 2 | 0 | 0 | 0.66086  | FALSE | 0 | CSNK1A1  | 2301520 | 0.576333 |
| 970.5  | 2 | 0 | 0 | 0.612135 | FALSE | 0 | CSNK1D   | 1000910 | 0.534454 |
| 1001.5 | 2 | 0 | 0 | 0.61576  | FALSE | 0 | CTDSPL2  | 1165610 | 0.53417  |
| 1001.5 | 2 | 0 | 0 | 0.61576  | FALSE | 0 | CTNNB1   | 1165610 | 0.53417  |
| 1001.5 | 2 | 0 | 0 | 0.61576  | FALSE | 0 | CTR9     | 1165610 | 0.53417  |
| 1503.5 | 2 | 0 | 0 | 0.66086  | FALSE | 0 | CUL4B    | 2301520 | 0.576333 |
| 1503.5 | 2 | 0 | 0 | 0.66086  | FALSE | 0 | CUX1     | 2301520 | 0.576333 |
| 1503.5 | 2 | 0 | 0 | 0.66086  | FALSE | 0 | DAG1     | 2301520 | 0.576333 |
| 727.5  | 2 | 0 | 0 | 0.588971 | FALSE | 0 | DCAF12   | 451510  | 0.505567 |
| 1503.5 | 2 | 0 | 0 | 0.66086  | FALSE | 0 | DCAF13   | 2301520 | 0.576333 |
| 1503.5 | 2 | 0 | 0 | 0.66086  | FALSE | 0 | DCBLD2   | 2301520 | 0.576333 |
| 1040   | 2 | 0 | 0 | 0.619877 | FALSE | 0 | DCTD     | 1300766 | 0.535567 |
| 1503.5 | 2 | 0 | 0 | 0.66086  | FALSE | 0 | DCUN1D1  | 2301520 | 0.576333 |
| 1503.5 | 2 | 0 | 0 | 0.66086  | FALSE | 0 | DCUN1D3  | 2301520 | 0.576333 |
| 1503.5 | 2 | 0 | 0 | 0.66086  | FALSE | 0 | DDX1     | 2301520 | 0.576333 |
| 1503.5 | 2 | 0 | 0 | 0.66086  | FALSE | 0 | DEGS1    | 2301520 | 0.576333 |
| 802    | 2 | 0 | 0 | 0.594931 | FALSE | 0 | DHX15    | 418940  | 0.522164 |
| 1503.5 | 2 | 0 | 0 | 0.66086  | FALSE | 0 | DHX33    | 2301520 | 0.576333 |
| 1503.5 | 2 | 0 | 0 | 0.66086  | FALSE | 0 | DLG5     | 2301520 | 0.576333 |
| 1503.5 | 2 | 0 | 0 | 0.66086  | FALSE | 0 | DNAJA1   | 2301520 | 0.576333 |
| 1503.5 | 2 | 0 | 0 | 0.66086  | FALSE | 0 | DNAJC7   | 2301520 | 0.576333 |
| 1116   | 2 | 0 | 0 | 0.626636 | FALSE | 0 | DNMT3A   | 1503526 | 0.543902 |
| 1116   | 2 | 0 | 0 | 0.626636 | FALSE | 0 | DST      | 1503526 | 0.543902 |
| 975.5  | 2 | 0 | 0 | 0.613118 | FALSE | 0 | DUSP1    | 1051910 | 0.532514 |
| 1503.5 | 2 | 0 | 0 | 0.66086  | FALSE | 0 | DYNC1LI2 | 2301520 | 0.576333 |
| 1503.5 | 2 | 0 | 0 | 0.66086  | FALSE | 0 | EDEM1    | 2301520 | 0.576333 |
| 1116   | 2 | 0 | 0 | 0.626636 | FALSE | 0 | EFCAB14  | 1503526 | 0.543902 |
| 1503.5 | 2 | 0 | 0 | 0.66086  | FALSE | 0 | EIF4A2   | 2301520 | 0.576333 |

|        |   |   |   |          |       |           |         |          |
|--------|---|---|---|----------|-------|-----------|---------|----------|
| 1116   | 2 | 0 | 0 | 0.626636 | FALSE | 0 EIF5    | 1503526 | 0.543902 |
| 1116   | 2 | 0 | 0 | 0.626636 | FALSE | 0 ELK3    | 1503526 | 0.543902 |
| 792    | 2 | 0 | 0 | 0.595853 | FALSE | 0 EN2     | 570406  | 0.510652 |
| 1503.5 | 2 | 0 | 0 | 0.66086  | FALSE | 0 EPC1    | 2301520 | 0.576333 |
| 1040   | 2 | 0 | 0 | 0.619877 | FALSE | 0 ERLIN2  | 1300766 | 0.535567 |
| 802    | 2 | 0 | 0 | 0.594931 | FALSE | 0 ERO1L   | 418940  | 0.522164 |
| 802    | 2 | 0 | 0 | 0.594931 | FALSE | 0 ETF1    | 418940  | 0.522164 |
| 740    | 2 | 0 | 0 | 0.590261 | FALSE | 0 EXOC8   | 258806  | 0.506859 |
| 1503.5 | 2 | 0 | 0 | 0.66086  | FALSE | 0 EXTL3   | 2301520 | 0.576333 |
| 1503.5 | 2 | 0 | 0 | 0.66086  | FALSE | 0 EZH2    | 2301520 | 0.576333 |
| 1503.5 | 2 | 0 | 0 | 0.66086  | FALSE | 0 FAM46A  | 2301520 | 0.576333 |
| 1503.5 | 2 | 0 | 0 | 0.66086  | FALSE | 0 FAM69A  | 2301520 | 0.576333 |
| 1040   | 2 | 0 | 0 | 0.619877 | FALSE | 0 FAM84B  | 1300766 | 0.535567 |
| 975.5  | 2 | 0 | 0 | 0.613118 | FALSE | 0 FANCM   | 1051910 | 0.532514 |
| 1503.5 | 2 | 0 | 0 | 0.66086  | FALSE | 0 FAR1    | 2301520 | 0.576333 |
| 1503.5 | 2 | 0 | 0 | 0.66086  | FALSE | 0 FBN2    | 2301520 | 0.576333 |
| 1503.5 | 2 | 0 | 0 | 0.66086  | FALSE | 0 FBXO11  | 2301520 | 0.576333 |
| 792    | 2 | 0 | 0 | 0.595853 | FALSE | 0 FBXW11  | 570406  | 0.510652 |
| 723    | 2 | 0 | 0 | 0.588479 | FALSE | 0 FHL1    | 219350  | 0.505248 |
| 814    | 2 | 0 | 0 | 0.598495 | FALSE | 0 FNIP1   | 585500  | 0.510678 |
| 975.5  | 2 | 0 | 0 | 0.613118 | FALSE | 0 FOS     | 1051910 | 0.532514 |
| 802    | 2 | 0 | 0 | 0.594931 | FALSE | 0 FOXK2   | 418940  | 0.522164 |
| 1503.5 | 2 | 0 | 0 | 0.66086  | FALSE | 0 FRS2    | 2301520 | 0.576333 |
| 937    | 2 | 0 | 0 | 0.611705 | FALSE | 0 FUT11   | 1095258 | 0.517986 |
| 792    | 2 | 0 | 0 | 0.595853 | FALSE | 0 FXR2    | 570406  | 0.510652 |
| 1503.5 | 2 | 0 | 0 | 0.66086  | FALSE | 0 FYN     | 2301520 | 0.576333 |
| 923.5  | 2 | 0 | 0 | 0.607957 | FALSE | 0 FZR1    | 884358  | 0.528351 |
| 1503.5 | 2 | 0 | 0 | 0.66086  | FALSE | 0 G3BP2   | 2301520 | 0.576333 |
| 1040   | 2 | 0 | 0 | 0.619877 | FALSE | 0 GCC1    | 1300766 | 0.535567 |
| 1503.5 | 2 | 0 | 0 | 0.66086  | FALSE | 0 GCLC    | 2301520 | 0.576333 |
| 923.5  | 2 | 0 | 0 | 0.607957 | FALSE | 0 GCN1L1  | 884358  | 0.528351 |
| 792    | 2 | 0 | 0 | 0.595853 | FALSE | 0 GFPT2   | 570406  | 0.510652 |
| 1503.5 | 2 | 0 | 0 | 0.66086  | FALSE | 0 GMEB2   | 2301520 | 0.576333 |
| 1001.5 | 2 | 0 | 0 | 0.61576  | FALSE | 0 GMPS    | 1165610 | 0.53417  |
| 1503.5 | 2 | 0 | 0 | 0.66086  | FALSE | 0 GNA13   | 2301520 | 0.576333 |
| 802    | 2 | 0 | 0 | 0.594931 | FALSE | 0 GNAI1   | 418940  | 0.522164 |
| 970.5  | 2 | 0 | 0 | 0.612135 | FALSE | 0 GOLGA7  | 1000910 | 0.534454 |
| 970.5  | 2 | 0 | 0 | 0.612135 | FALSE | 0 GORASP2 | 1000910 | 0.534454 |
| 1503.5 | 2 | 0 | 0 | 0.66086  | FALSE | 0 GPAM    | 2301520 | 0.576333 |
| 1503.5 | 2 | 0 | 0 | 0.66086  | FALSE | 0 GPCPD1  | 2301520 | 0.576333 |
| 1503.5 | 2 | 0 | 0 | 0.66086  | FALSE | 0 GPD2    | 2301520 | 0.576333 |
| 1116   | 2 | 0 | 0 | 0.626636 | FALSE | 0 GPRC5A  | 1503526 | 0.543902 |
| 937    | 2 | 0 | 0 | 0.611705 | FALSE | 0 GRAMD1B | 1095258 | 0.517986 |
| 1503.5 | 2 | 0 | 0 | 0.66086  | FALSE | 0 GRIK3   | 2301520 | 0.576333 |
| 1503.5 | 2 | 0 | 0 | 0.66086  | FALSE | 0 GRSF1   | 2301520 | 0.576333 |
| 1503.5 | 2 | 0 | 0 | 0.66086  | FALSE | 0 GSE1    | 2301520 | 0.576333 |
| 1503.5 | 2 | 0 | 0 | 0.66086  | FALSE | 0 GTF2A1  | 2301520 | 0.576333 |



|        |   |   |   |          |       |   |           |         |          |
|--------|---|---|---|----------|-------|---|-----------|---------|----------|
| 937    | 2 | 0 | 0 | 0.611705 | FALSE | 0 | GTF2E2    | 1095258 | 0.517986 |
| 1001.5 | 2 | 0 | 0 | 0.61576  | FALSE | 0 | HDAC2     | 1165610 | 0.53417  |
| 802    | 2 | 0 | 0 | 0.594931 | FALSE | 0 | HELLS     | 418940  | 0.522164 |
| 970.5  | 2 | 0 | 0 | 0.612135 | FALSE | 0 | HIAT1     | 1000910 | 0.534454 |
| 1001.5 | 2 | 0 | 0 | 0.61576  | FALSE | 0 | HIATL1    | 1165610 | 0.53417  |
| 727.5  | 2 | 0 | 0 | 0.588971 | FALSE | 0 | HIST1H4C  | 451510  | 0.505567 |
| 739.5  | 2 | 0 | 0 | 0.58977  | FALSE | 0 | HIVEP3    | 228972  | 0.50931  |
| 1116   | 2 | 0 | 0 | 0.626636 | FALSE | 0 | HMGXB4    | 1503526 | 0.543902 |
| 802    | 2 | 0 | 0 | 0.594931 | FALSE | 0 | HNRNPAO   | 418940  | 0.522164 |
| 740    | 2 | 0 | 0 | 0.590261 | FALSE | 0 | HNRNPH2   | 258806  | 0.506859 |
| 923.5  | 2 | 0 | 0 | 0.607957 | FALSE | 0 | HOXA10    | 884358  | 0.528351 |
| 1001.5 | 2 | 0 | 0 | 0.61576  | FALSE | 0 | HOXA9     | 1165610 | 0.53417  |
| 1503.5 | 2 | 0 | 0 | 0.66086  | FALSE | 0 | HPRT1     | 2301520 | 0.576333 |
| 1116   | 2 | 0 | 0 | 0.626636 | FALSE | 0 | HSDL1     | 1503526 | 0.543902 |
| 923.5  | 2 | 0 | 0 | 0.607957 | FALSE | 0 | HSP90AA1  | 884358  | 0.528351 |
| 1001.5 | 2 | 0 | 0 | 0.61576  | FALSE | 0 | HSP90AB1  | 1165610 | 0.53417  |
| 923.5  | 2 | 0 | 0 | 0.607957 | FALSE | 0 | HSPA13    | 884358  | 0.528351 |
| 1116   | 2 | 0 | 0 | 0.626636 | FALSE | 0 | IER3      | 1503526 | 0.543902 |
| 975.5  | 2 | 0 | 0 | 0.613118 | FALSE | 0 | IFITM3    | 1051910 | 0.532514 |
| 1503.5 | 2 | 0 | 0 | 0.66086  | FALSE | 0 | INA       | 2301520 | 0.576333 |
| 1001.5 | 2 | 0 | 0 | 0.61576  | FALSE | 0 | ITGA3     | 1165610 | 0.53417  |
| 1503.5 | 2 | 0 | 0 | 0.66086  | FALSE | 0 | JAZF1     | 2301520 | 0.576333 |
| 1503.5 | 2 | 0 | 0 | 0.66086  | FALSE | 0 | KBTBD2    | 2301520 | 0.576333 |
| 1503.5 | 2 | 0 | 0 | 0.66086  | FALSE | 0 | KCNQ5     | 2301520 | 0.576333 |
| 802    | 2 | 0 | 0 | 0.594931 | FALSE | 0 | KCTD2     | 418940  | 0.522164 |
| 923.5  | 2 | 0 | 0 | 0.607957 | FALSE | 0 | KIAA0319L | 884358  | 0.528351 |
| 1503.5 | 2 | 0 | 0 | 0.66086  | FALSE | 0 | KIAA1598  | 2301520 | 0.576333 |
| 1503.5 | 2 | 0 | 0 | 0.66086  | FALSE | 0 | KIAA2026  | 2301520 | 0.576333 |
| 1503.5 | 2 | 0 | 0 | 0.66086  | FALSE | 0 | KIF13A    | 2301520 | 0.576333 |
| 970.5  | 2 | 0 | 0 | 0.612135 | FALSE | 0 | KIF1B     | 1000910 | 0.534454 |
| 1001.5 | 2 | 0 | 0 | 0.61576  | FALSE | 0 | KLC1      | 1165610 | 0.53417  |
| 1503.5 | 2 | 0 | 0 | 0.66086  | FALSE | 0 | KLF12     | 2301520 | 0.576333 |
| 1503.5 | 2 | 0 | 0 | 0.66086  | FALSE | 0 | KLF3      | 2301520 | 0.576333 |
| 1503.5 | 2 | 0 | 0 | 0.66086  | FALSE | 0 | KLF6      | 2301520 | 0.576333 |
| 970.5  | 2 | 0 | 0 | 0.612135 | FALSE | 0 | KMT2E     | 1000910 | 0.534454 |
| 723    | 2 | 0 | 0 | 0.588479 | FALSE | 0 | L2HGDH    | 219350  | 0.505248 |
| 937    | 2 | 0 | 0 | 0.611705 | FALSE | 0 | LANCL3    | 1095258 | 0.517986 |
| 1040   | 2 | 0 | 0 | 0.619877 | FALSE | 0 | LIN7C     | 1300766 | 0.535567 |
| 1503.5 | 2 | 0 | 0 | 0.66086  | FALSE | 0 | LPGAT1    | 2301520 | 0.576333 |
| 1503.5 | 2 | 0 | 0 | 0.66086  | FALSE | 0 | LPHN2     | 2301520 | 0.576333 |
| 937    | 2 | 0 | 0 | 0.611705 | FALSE | 0 | LRIF1     | 1095258 | 0.517986 |
| 1503.5 | 2 | 0 | 0 | 0.66086  | FALSE | 0 | LTN1      | 2301520 | 0.576333 |
| 1040   | 2 | 0 | 0 | 0.619877 | FALSE | 0 | MAFK      | 1300766 | 0.535567 |
| 1116   | 2 | 0 | 0 | 0.626636 | FALSE | 0 | MAGT1     | 1503526 | 0.543902 |
| 937    | 2 | 0 | 0 | 0.611705 | FALSE | 0 | MAML3     | 1095258 | 0.517986 |
| 923.5  | 2 | 0 | 0 | 0.607957 | FALSE | 0 | MAP2K1    | 884358  | 0.528351 |
| 1503.5 | 2 | 0 | 0 | 0.66086  | FALSE | 0 | MAP3K2    | 2301520 | 0.576333 |

|        |   |   |   |          |       |   |           |         |          |
|--------|---|---|---|----------|-------|---|-----------|---------|----------|
| 1503.5 | 2 | 0 | 0 | 0.66086  | FALSE | 0 | MAP3K9    | 2301520 | 0.576333 |
| 1503.5 | 2 | 0 | 0 | 0.66086  | FALSE | 0 | MAPK1IP1I | 2301520 | 0.576333 |
| 1040   | 2 | 0 | 0 | 0.619877 | FALSE | 0 | MAPK6     | 1300766 | 0.535567 |
| 923.5  | 2 | 0 | 0 | 0.607957 | FALSE | 0 | MARCKSL1  | 884358  | 0.528351 |
| 1116   | 2 | 0 | 0 | 0.626636 | FALSE | 0 | MATR3     | 1503526 | 0.543902 |
| 1503.5 | 2 | 0 | 0 | 0.66086  | FALSE | 0 | MAVS      | 2301520 | 0.576333 |
| 1503.5 | 2 | 0 | 0 | 0.66086  | FALSE | 0 | MBNL1     | 2301520 | 0.576333 |
| 1503.5 | 2 | 0 | 0 | 0.66086  | FALSE | 0 | MBNL2     | 2301520 | 0.576333 |
| 1503.5 | 2 | 0 | 0 | 0.66086  | FALSE | 0 | MCC       | 2301520 | 0.576333 |
| 1040   | 2 | 0 | 0 | 0.619877 | FALSE | 0 | MCTS1     | 1300766 | 0.535567 |
| 937    | 2 | 0 | 0 | 0.611705 | FALSE | 0 | MED17     | 1095258 | 0.517986 |
| 1503.5 | 2 | 0 | 0 | 0.66086  | FALSE | 0 | MEF2A     | 2301520 | 0.576333 |
| 923.5  | 2 | 0 | 0 | 0.607957 | FALSE | 0 | MET       | 884358  | 0.528351 |
| 814    | 2 | 0 | 0 | 0.598495 | FALSE | 0 | METTTL14  | 585500  | 0.510678 |
| 1503.5 | 2 | 0 | 0 | 0.66086  | FALSE | 0 | MEX3B     | 2301520 | 0.576333 |
| 1503.5 | 2 | 0 | 0 | 0.66086  | FALSE | 0 | MFF       | 2301520 | 0.576333 |
| 1116   | 2 | 0 | 0 | 0.626636 | FALSE | 0 | MGARP     | 1503526 | 0.543902 |
| 1503.5 | 2 | 0 | 0 | 0.66086  | FALSE | 0 | MGAT4A    | 2301520 | 0.576333 |
| 1116   | 2 | 0 | 0 | 0.626636 | FALSE | 0 | MITF      | 1503526 | 0.543902 |
| 1503.5 | 2 | 0 | 0 | 0.66086  | FALSE | 0 | MKL2      | 2301520 | 0.576333 |
| 1503.5 | 2 | 0 | 0 | 0.66086  | FALSE | 0 | MLEC      | 2301520 | 0.576333 |
| 1503.5 | 2 | 0 | 0 | 0.66086  | FALSE | 0 | MLK4      | 2301520 | 0.576333 |
| 937    | 2 | 0 | 0 | 0.611705 | FALSE | 0 | MMS22L    | 1095258 | 0.517986 |
| 802    | 2 | 0 | 0 | 0.594931 | FALSE | 0 | MORC3     | 418940  | 0.522164 |
| 727.5  | 2 | 0 | 0 | 0.588971 | FALSE | 0 | MPHOSPH   | 451510  | 0.505567 |
| 1503.5 | 2 | 0 | 0 | 0.66086  | FALSE | 0 | MPRIP     | 2301520 | 0.576333 |
| 727.5  | 2 | 0 | 0 | 0.588971 | FALSE | 0 | MRFAP1    | 451510  | 0.505567 |
| 1001.5 | 2 | 0 | 0 | 0.61576  | FALSE | 0 | MSN       | 1165610 | 0.53417  |
| 1503.5 | 2 | 0 | 0 | 0.66086  | FALSE | 0 | MTF2      | 2301520 | 0.576333 |
| 1503.5 | 2 | 0 | 0 | 0.66086  | FALSE | 0 | MTMR4     | 2301520 | 0.576333 |
| 1503.5 | 2 | 0 | 0 | 0.66086  | FALSE | 0 | MTMR6     | 2301520 | 0.576333 |
| 739.5  | 2 | 0 | 0 | 0.58977  | FALSE | 0 | MYO1B     | 228972  | 0.50931  |
| 1001.5 | 2 | 0 | 0 | 0.61576  | FALSE | 0 | MYO5A     | 1165610 | 0.53417  |
| 923.5  | 2 | 0 | 0 | 0.607957 | FALSE | 0 | MYPOP     | 884358  | 0.528351 |
| 802    | 2 | 0 | 0 | 0.594931 | FALSE | 0 | N4BP1     | 418940  | 0.522164 |
| 1001.5 | 2 | 0 | 0 | 0.61576  | FALSE | 0 | NAA30     | 1165610 | 0.53417  |
| 1040   | 2 | 0 | 0 | 0.619877 | FALSE | 0 | NACA      | 1300766 | 0.535567 |
| 814    | 2 | 0 | 0 | 0.598495 | FALSE | 0 | NDEL1     | 585500  | 0.510678 |
| 1503.5 | 2 | 0 | 0 | 0.66086  | FALSE | 0 | NFIB      | 2301520 | 0.576333 |
| 1040   | 2 | 0 | 0 | 0.619877 | FALSE | 0 | NHLRC2    | 1300766 | 0.535567 |
| 923.5  | 2 | 0 | 0 | 0.607957 | FALSE | 0 | NISCH     | 884358  | 0.528351 |
| 975.5  | 2 | 0 | 0 | 0.613118 | FALSE | 0 | NMI       | 1051910 | 0.532514 |
| 937    | 2 | 0 | 0 | 0.611705 | FALSE | 0 | NR2F6     | 1095258 | 0.517986 |
| 702.5  | 2 | 0 | 0 | 0.586329 | FALSE | 0 | NR3C1     | 108506  | 0.503228 |
| 1001.5 | 2 | 0 | 0 | 0.61576  | FALSE | 0 | NRP1      | 1165610 | 0.53417  |
| 1503.5 | 2 | 0 | 0 | 0.66086  | FALSE | 0 | NUS1      | 2301520 | 0.576333 |
| 814    | 2 | 0 | 0 | 0.598495 | FALSE | 0 | OSMR      | 585500  | 0.510678 |

|        |   |   |   |          |       |   |          |         |          |
|--------|---|---|---|----------|-------|---|----------|---------|----------|
| 937    | 2 | 0 | 0 | 0.611705 | FALSE | 0 | PAK2     | 1095258 | 0.517986 |
| 923.5  | 2 | 0 | 0 | 0.607957 | FALSE | 0 | PARVA    | 884358  | 0.528351 |
| 1503.5 | 2 | 0 | 0 | 0.66086  | FALSE | 0 | PCDH10   | 2301520 | 0.576333 |
| 1503.5 | 2 | 0 | 0 | 0.66086  | FALSE | 0 | PCDH7    | 2301520 | 0.576333 |
| 1503.5 | 2 | 0 | 0 | 0.66086  | FALSE | 0 | PCGF5    | 2301520 | 0.576333 |
| 1503.5 | 2 | 0 | 0 | 0.66086  | FALSE | 0 | PDCD10   | 2301520 | 0.576333 |
| 802    | 2 | 0 | 0 | 0.594931 | FALSE | 0 | PDK1     | 418940  | 0.522164 |
| 1503.5 | 2 | 0 | 0 | 0.66086  | FALSE | 0 | PDLIM5   | 2301520 | 0.576333 |
| 1503.5 | 2 | 0 | 0 | 0.66086  | FALSE | 0 | PDXDC1   | 2301520 | 0.576333 |
| 1001.5 | 2 | 0 | 0 | 0.61576  | FALSE | 0 | PHACTR2  | 1165610 | 0.53417  |
| 1503.5 | 2 | 0 | 0 | 0.66086  | FALSE | 0 | PHF13    | 2301520 | 0.576333 |
| 1503.5 | 2 | 0 | 0 | 0.66086  | FALSE | 0 | PHF20    | 2301520 | 0.576333 |
| 1503.5 | 2 | 0 | 0 | 0.66086  | FALSE | 0 | PHIP     | 2301520 | 0.576333 |
| 1503.5 | 2 | 0 | 0 | 0.66086  | FALSE | 0 | PIK3CB   | 2301520 | 0.576333 |
| 814    | 2 | 0 | 0 | 0.598495 | FALSE | 0 | PIK3CD   | 585500  | 0.510678 |
| 1503.5 | 2 | 0 | 0 | 0.66086  | FALSE | 0 | PIKFYVE  | 2301520 | 0.576333 |
| 937    | 2 | 0 | 0 | 0.611705 | FALSE | 0 | PLEKHA3  | 1095258 | 0.517986 |
| 1116   | 2 | 0 | 0 | 0.626636 | FALSE | 0 | PMP22    | 1503526 | 0.543902 |
| 702.5  | 2 | 0 | 0 | 0.586329 | FALSE | 0 | PPARGC1B | 108506  | 0.503228 |
| 1503.5 | 2 | 0 | 0 | 0.66086  | FALSE | 0 | PPM1A    | 2301520 | 0.576333 |
| 923.5  | 2 | 0 | 0 | 0.607957 | FALSE | 0 | PPP1CC   | 884358  | 0.528351 |
| 1503.5 | 2 | 0 | 0 | 0.66086  | FALSE | 0 | PPP2R5A  | 2301520 | 0.576333 |
| 937    | 2 | 0 | 0 | 0.611705 | FALSE | 0 | PPP3CB   | 1095258 | 0.517986 |
| 1503.5 | 2 | 0 | 0 | 0.66086  | FALSE | 0 | PPTC7    | 2301520 | 0.576333 |
| 1503.5 | 2 | 0 | 0 | 0.66086  | FALSE | 0 | PRC1     | 2301520 | 0.576333 |
| 1001.5 | 2 | 0 | 0 | 0.61576  | FALSE | 0 | PRDM1    | 1165610 | 0.53417  |
| 1503.5 | 2 | 0 | 0 | 0.66086  | FALSE | 0 | PRICKLE2 | 2301520 | 0.576333 |
| 937    | 2 | 0 | 0 | 0.611705 | FALSE | 0 | PRIM1    | 1095258 | 0.517986 |
| 1503.5 | 2 | 0 | 0 | 0.66086  | FALSE | 0 | PRLR     | 2301520 | 0.576333 |
| 1040   | 2 | 0 | 0 | 0.619877 | FALSE | 0 | PSMB2    | 1300766 | 0.535567 |
| 1116   | 2 | 0 | 0 | 0.626636 | FALSE | 0 | PSPC1    | 1503526 | 0.543902 |
| 792    | 2 | 0 | 0 | 0.595853 | FALSE | 0 | PTPN14   | 570406  | 0.510652 |
| 1503.5 | 2 | 0 | 0 | 0.66086  | FALSE | 0 | PTX3     | 2301520 | 0.576333 |
| 1503.5 | 2 | 0 | 0 | 0.66086  | FALSE | 0 | PUM2     | 2301520 | 0.576333 |
| 1503.5 | 2 | 0 | 0 | 0.66086  | FALSE | 0 | RAB1A    | 2301520 | 0.576333 |
| 1503.5 | 2 | 0 | 0 | 0.66086  | FALSE | 0 | RAB21    | 2301520 | 0.576333 |
| 937    | 2 | 0 | 0 | 0.611705 | FALSE | 0 | RAB3D    | 1095258 | 0.517986 |
| 1503.5 | 2 | 0 | 0 | 0.66086  | FALSE | 0 | RAB8B    | 2301520 | 0.576333 |
| 1503.5 | 2 | 0 | 0 | 0.66086  | FALSE | 0 | RAI1     | 2301520 | 0.576333 |
| 1503.5 | 2 | 0 | 0 | 0.66086  | FALSE | 0 | RAP2C    | 2301520 | 0.576333 |
| 1503.5 | 2 | 0 | 0 | 0.66086  | FALSE | 0 | RAPGEF6  | 2301520 | 0.576333 |
| 937    | 2 | 0 | 0 | 0.611705 | FALSE | 0 | RASSF9   | 1095258 | 0.517986 |
| 937    | 2 | 0 | 0 | 0.611705 | FALSE | 0 | RBM12B   | 1095258 | 0.517986 |
| 937    | 2 | 0 | 0 | 0.611705 | FALSE | 0 | RBM22    | 1095258 | 0.517986 |
| 1503.5 | 2 | 0 | 0 | 0.66086  | FALSE | 0 | RBM25    | 2301520 | 0.576333 |
| 1116   | 2 | 0 | 0 | 0.626636 | FALSE | 0 | RBM27    | 1503526 | 0.543902 |
| 1040   | 2 | 0 | 0 | 0.619877 | FALSE | 0 | REEP5    | 1300766 | 0.535567 |

|        |   |   |   |          |       |   |          |         |          |
|--------|---|---|---|----------|-------|---|----------|---------|----------|
| 937    | 2 | 0 | 0 | 0.611705 | FALSE | 0 | REPIN1   | 1095258 | 0.517986 |
| 923.5  | 2 | 0 | 0 | 0.607957 | FALSE | 0 | RFX3     | 884358  | 0.528351 |
| 1503.5 | 2 | 0 | 0 | 0.66086  | FALSE | 0 | RNF111   | 2301520 | 0.576333 |
| 1503.5 | 2 | 0 | 0 | 0.66086  | FALSE | 0 | RNF139   | 2301520 | 0.576333 |
| 1116   | 2 | 0 | 0 | 0.626636 | FALSE | 0 | RNF213   | 1503526 | 0.543902 |
| 1503.5 | 2 | 0 | 0 | 0.66086  | FALSE | 0 | RNF216   | 2301520 | 0.576333 |
| 1503.5 | 2 | 0 | 0 | 0.66086  | FALSE | 0 | RPL15    | 2301520 | 0.576333 |
| 1040   | 2 | 0 | 0 | 0.619877 | FALSE | 0 | RPL3     | 1300766 | 0.535567 |
| 937    | 2 | 0 | 0 | 0.611705 | FALSE | 0 | RPL7L1   | 1095258 | 0.517986 |
| 1503.5 | 2 | 0 | 0 | 0.66086  | FALSE | 0 | RPS23    | 2301520 | 0.576333 |
| 1001.5 | 2 | 0 | 0 | 0.61576  | FALSE | 0 | RPS6KA3  | 1165610 | 0.53417  |
| 1503.5 | 2 | 0 | 0 | 0.66086  | FALSE | 0 | RPS6KA5  | 2301520 | 0.576333 |
| 1503.5 | 2 | 0 | 0 | 0.66086  | FALSE | 0 | RRM1     | 2301520 | 0.576333 |
| 802    | 2 | 0 | 0 | 0.594931 | FALSE | 0 | RRN3     | 418940  | 0.522164 |
| 1040   | 2 | 0 | 0 | 0.619877 | FALSE | 0 | SACM1L   | 1300766 | 0.535567 |
| 1040   | 2 | 0 | 0 | 0.619877 | FALSE | 0 | SACS     | 1300766 | 0.535567 |
| 792    | 2 | 0 | 0 | 0.595853 | FALSE | 0 | SCOC     | 570406  | 0.510652 |
| 1503.5 | 2 | 0 | 0 | 0.66086  | FALSE | 0 | SDC2     | 2301520 | 0.576333 |
| 1503.5 | 2 | 0 | 0 | 0.66086  | FALSE | 0 | SDE2     | 2301520 | 0.576333 |
| 1503.5 | 2 | 0 | 0 | 0.66086  | FALSE | 0 | SEL1L    | 2301520 | 0.576333 |
| 1503.5 | 2 | 0 | 0 | 0.66086  | FALSE | 0 | SERINC1  | 2301520 | 0.576333 |
| 1040   | 2 | 0 | 0 | 0.619877 | FALSE | 0 | SETD7    | 1300766 | 0.535567 |
| 1040   | 2 | 0 | 0 | 0.619877 | FALSE | 0 | SETX     | 1300766 | 0.535567 |
| 1116   | 2 | 0 | 0 | 0.626636 | FALSE | 0 | SFXN1    | 1503526 | 0.543902 |
| 1116   | 2 | 0 | 0 | 0.626636 | FALSE | 0 | SGPL1    | 1503526 | 0.543902 |
| 923.5  | 2 | 0 | 0 | 0.607957 | FALSE | 0 | SHMT1    | 884358  | 0.528351 |
| 975.5  | 2 | 0 | 0 | 0.613118 | FALSE | 0 | SIKE1    | 1051910 | 0.532514 |
| 1503.5 | 2 | 0 | 0 | 0.66086  | FALSE | 0 | SKIL     | 2301520 | 0.576333 |
| 937    | 2 | 0 | 0 | 0.611705 | FALSE | 0 | SLC11A2  | 1095258 | 0.517986 |
| 970.5  | 2 | 0 | 0 | 0.612135 | FALSE | 0 | SLC19A2  | 1000910 | 0.534454 |
| 1116   | 2 | 0 | 0 | 0.626636 | FALSE | 0 | SLC39A10 | 1503526 | 0.543902 |
| 1503.5 | 2 | 0 | 0 | 0.66086  | FALSE | 0 | SLC9A1   | 2301520 | 0.576333 |
| 1503.5 | 2 | 0 | 0 | 0.66086  | FALSE | 0 | SLTM     | 2301520 | 0.576333 |
| 739.5  | 2 | 0 | 0 | 0.58977  | FALSE | 0 | SMC4     | 228972  | 0.50931  |
| 739.5  | 2 | 0 | 0 | 0.58977  | FALSE | 0 | SMCO4    | 228972  | 0.50931  |
| 802    | 2 | 0 | 0 | 0.594931 | FALSE | 0 | SMIM15   | 418940  | 0.522164 |
| 937    | 2 | 0 | 0 | 0.611705 | FALSE | 0 | SMU1     | 1095258 | 0.517986 |
| 1503.5 | 2 | 0 | 0 | 0.66086  | FALSE | 0 | SNX27    | 2301520 | 0.576333 |
| 1040   | 2 | 0 | 0 | 0.619877 | FALSE | 0 | SOGA3    | 1300766 | 0.535567 |
| 1001.5 | 2 | 0 | 0 | 0.61576  | FALSE | 0 | SOX9     | 1165610 | 0.53417  |
| 1001.5 | 2 | 0 | 0 | 0.61576  | FALSE | 0 | SP1      | 1165610 | 0.53417  |
| 1503.5 | 2 | 0 | 0 | 0.66086  | FALSE | 0 | SPATA2   | 2301520 | 0.576333 |
| 1040   | 2 | 0 | 0 | 0.619877 | FALSE | 0 | STAG2    | 1300766 | 0.535567 |
| 1503.5 | 2 | 0 | 0 | 0.66086  | FALSE | 0 | STARD3NL | 2301520 | 0.576333 |
| 923.5  | 2 | 0 | 0 | 0.607957 | FALSE | 0 | STC2     | 884358  | 0.528351 |
| 1503.5 | 2 | 0 | 0 | 0.66086  | FALSE | 0 | STMN1    | 2301520 | 0.576333 |
| 975.5  | 2 | 0 | 0 | 0.613118 | FALSE | 0 | STON2    | 1051910 | 0.532514 |

|        |   |   |   |          |       |            |         |          |
|--------|---|---|---|----------|-------|------------|---------|----------|
| 1503.5 | 2 | 0 | 0 | 0.66086  | FALSE | 0 STRN3    | 2301520 | 0.576333 |
| 1503.5 | 2 | 0 | 0 | 0.66086  | FALSE | 0 STYX     | 2301520 | 0.576333 |
| 727.5  | 2 | 0 | 0 | 0.588971 | FALSE | 0 SUB1     | 451510  | 0.505567 |
| 1503.5 | 2 | 0 | 0 | 0.66086  | FALSE | 0 SUZ12    | 2301520 | 0.576333 |
| 1503.5 | 2 | 0 | 0 | 0.66086  | FALSE | 0 SYNCRIP  | 2301520 | 0.576333 |
| 1503.5 | 2 | 0 | 0 | 0.66086  | FALSE | 0 SYPL1    | 2301520 | 0.576333 |
| 1040   | 2 | 0 | 0 | 0.619877 | FALSE | 0 SZRD1    | 1300766 | 0.535567 |
| 923.5  | 2 | 0 | 0 | 0.607957 | FALSE | 0 TADA2B   | 884358  | 0.528351 |
| 937    | 2 | 0 | 0 | 0.611705 | FALSE | 0 TAF13    | 1095258 | 0.517986 |
| 1503.5 | 2 | 0 | 0 | 0.66086  | FALSE | 0 TAF3     | 2301520 | 0.576333 |
| 1503.5 | 2 | 0 | 0 | 0.66086  | FALSE | 0 TANC2    | 2301520 | 0.576333 |
| 1503.5 | 2 | 0 | 0 | 0.66086  | FALSE | 0 TBPL1    | 2301520 | 0.576333 |
| 937    | 2 | 0 | 0 | 0.611705 | FALSE | 0 TBX20    | 1095258 | 0.517986 |
| 1116   | 2 | 0 | 0 | 0.626636 | FALSE | 0 TET2     | 1503526 | 0.543902 |
| 1116   | 2 | 0 | 0 | 0.626636 | FALSE | 0 TFAP4    | 1503526 | 0.543902 |
| 723    | 2 | 0 | 0 | 0.588479 | FALSE | 0 TGFBR1   | 219350  | 0.505248 |
| 740    | 2 | 0 | 0 | 0.590261 | FALSE | 0 TGFBR3   | 258806  | 0.506859 |
| 802    | 2 | 0 | 0 | 0.594931 | FALSE | 0 THRB     | 418940  | 0.522164 |
| 1116   | 2 | 0 | 0 | 0.626636 | FALSE | 0 TMED5    | 1503526 | 0.543902 |
| 1116   | 2 | 0 | 0 | 0.626636 | FALSE | 0 TMEM19   | 1503526 | 0.543902 |
| 802    | 2 | 0 | 0 | 0.594931 | FALSE | 0 TMEM192  | 418940  | 0.522164 |
| 1040   | 2 | 0 | 0 | 0.619877 | FALSE | 0 TMEM201  | 1300766 | 0.535567 |
| 1503.5 | 2 | 0 | 0 | 0.66086  | FALSE | 0 TMEM30A  | 2301520 | 0.576333 |
| 1503.5 | 2 | 0 | 0 | 0.66086  | FALSE | 0 TMEM64   | 2301520 | 0.576333 |
| 937    | 2 | 0 | 0 | 0.611705 | FALSE | 0 TMEM65   | 1095258 | 0.517986 |
| 1503.5 | 2 | 0 | 0 | 0.66086  | FALSE | 0 TMEM87A  | 2301520 | 0.576333 |
| 1503.5 | 2 | 0 | 0 | 0.66086  | FALSE | 0 TMTC3    | 2301520 | 0.576333 |
| 792    | 2 | 0 | 0 | 0.595853 | FALSE | 0 TNFAIP1  | 570406  | 0.510652 |
| 792    | 2 | 0 | 0 | 0.595853 | FALSE | 0 TNFRSF21 | 570406  | 0.510652 |
| 923.5  | 2 | 0 | 0 | 0.607957 | FALSE | 0 TNRC18P2 | 884358  | 0.528351 |
| 1503.5 | 2 | 0 | 0 | 0.66086  | FALSE | 0 TNRC6C   | 2301520 | 0.576333 |
| 1503.5 | 2 | 0 | 0 | 0.66086  | FALSE | 0 TOP2B    | 2301520 | 0.576333 |
| 1503.5 | 2 | 0 | 0 | 0.66086  | FALSE | 0 TOR1AIP1 | 2301520 | 0.576333 |
| 1503.5 | 2 | 0 | 0 | 0.66086  | FALSE | 0 TOR1AIP2 | 2301520 | 0.576333 |
| 1040   | 2 | 0 | 0 | 0.619877 | FALSE | 0 TPI1     | 1300766 | 0.535567 |
| 1503.5 | 2 | 0 | 0 | 0.66086  | FALSE | 0 TRIM37   | 2301520 | 0.576333 |
| 1001.5 | 2 | 0 | 0 | 0.61576  | FALSE | 0 TRIO     | 1165610 | 0.53417  |
| 1503.5 | 2 | 0 | 0 | 0.66086  | FALSE | 0 TRIP12   | 2301520 | 0.576333 |
| 1503.5 | 2 | 0 | 0 | 0.66086  | FALSE | 0 TROVE2   | 2301520 | 0.576333 |
| 1503.5 | 2 | 0 | 0 | 0.66086  | FALSE | 0 TSPAN12  | 2301520 | 0.576333 |
| 1001.5 | 2 | 0 | 0 | 0.61576  | FALSE | 0 TSPAN13  | 1165610 | 0.53417  |
| 1116   | 2 | 0 | 0 | 0.626636 | FALSE | 0 TUBA1C   | 1503526 | 0.543902 |
| 1503.5 | 2 | 0 | 0 | 0.66086  | FALSE | 0 TUSC2    | 2301520 | 0.576333 |
| 1503.5 | 2 | 0 | 0 | 0.66086  | FALSE | 0 UBE2D2   | 2301520 | 0.576333 |
| 1503.5 | 2 | 0 | 0 | 0.66086  | FALSE | 0 UBE2D3   | 2301520 | 0.576333 |
| 802    | 2 | 0 | 0 | 0.594931 | FALSE | 0 UBE2E2   | 418940  | 0.522164 |
| 1503.5 | 2 | 0 | 0 | 0.66086  | FALSE | 0 UBQLN1   | 2301520 | 0.576333 |

|        |   |   |   |          |       |   |           |         |          |
|--------|---|---|---|----------|-------|---|-----------|---------|----------|
| 1040   | 2 | 0 | 0 | 0.619877 | FALSE | 0 | UBXN1     | 1300766 | 0.535567 |
| 723    | 2 | 0 | 0 | 0.588479 | FALSE | 0 | USP3      | 219350  | 0.505248 |
| 1503.5 | 2 | 0 | 0 | 0.66086  | FALSE | 0 | USP34     | 2301520 | 0.576333 |
| 792    | 2 | 0 | 0 | 0.595853 | FALSE | 0 | USP36     | 570406  | 0.510652 |
| 1040   | 2 | 0 | 0 | 0.619877 | FALSE | 0 | USP46     | 1300766 | 0.535567 |
| 802    | 2 | 0 | 0 | 0.594931 | FALSE | 0 | USP9X     | 418940  | 0.522164 |
| 1503.5 | 2 | 0 | 0 | 0.66086  | FALSE | 0 | VAMP3     | 2301520 | 0.576333 |
| 1503.5 | 2 | 0 | 0 | 0.66086  | FALSE | 0 | VAPA      | 2301520 | 0.576333 |
| 1001.5 | 2 | 0 | 0 | 0.61576  | FALSE | 0 | VCAN      | 1165610 | 0.53417  |
| 923.5  | 2 | 0 | 0 | 0.607957 | FALSE | 0 | VCL       | 884358  | 0.528351 |
| 937    | 2 | 0 | 0 | 0.611705 | FALSE | 0 | VEGFC     | 1095258 | 0.517986 |
| 1503.5 | 2 | 0 | 0 | 0.66086  | FALSE | 0 | WAC       | 2301520 | 0.576333 |
| 1116   | 2 | 0 | 0 | 0.626636 | FALSE | 0 | WEE1      | 1503526 | 0.543902 |
| 727.5  | 2 | 0 | 0 | 0.588971 | FALSE | 0 | YAE1D1    | 451510  | 0.505567 |
| 1116   | 2 | 0 | 0 | 0.626636 | FALSE | 0 | YTHDC1    | 1503526 | 0.543902 |
| 1503.5 | 2 | 0 | 0 | 0.66086  | FALSE | 0 | ZBTB34    | 2301520 | 0.576333 |
| 1503.5 | 2 | 0 | 0 | 0.66086  | FALSE | 0 | ZBTB38    | 2301520 | 0.576333 |
| 923.5  | 2 | 0 | 0 | 0.607957 | FALSE | 0 | ZBTB7A    | 884358  | 0.528351 |
| 739.5  | 2 | 0 | 0 | 0.58977  | FALSE | 0 | ZC3H6     | 228972  | 0.50931  |
| 802    | 2 | 0 | 0 | 0.594931 | FALSE | 0 | ZCCHC2    | 418940  | 0.522164 |
| 723    | 2 | 0 | 0 | 0.588479 | FALSE | 0 | ZDHHC15   | 219350  | 0.505248 |
| 970.5  | 2 | 0 | 0 | 0.612135 | FALSE | 0 | ZFAND6    | 1000910 | 0.534454 |
| 1503.5 | 2 | 0 | 0 | 0.66086  | FALSE | 0 | ZKSCAN1   | 2301520 | 0.576333 |
| 1503.5 | 2 | 0 | 0 | 0.66086  | FALSE | 0 | ZMAT3     | 2301520 | 0.576333 |
| 1503.5 | 2 | 0 | 0 | 0.66086  | FALSE | 0 | ZMYM2     | 2301520 | 0.576333 |
| 1001.5 | 2 | 0 | 0 | 0.61576  | FALSE | 0 | ZNF100    | 1165610 | 0.53417  |
| 1040   | 2 | 0 | 0 | 0.619877 | FALSE | 0 | ZNF146    | 1300766 | 0.535567 |
| 1503.5 | 2 | 0 | 0 | 0.66086  | FALSE | 0 | ZNF431    | 2301520 | 0.576333 |
| 1040   | 2 | 0 | 0 | 0.619877 | FALSE | 0 | ZNF567    | 1300766 | 0.535567 |
| 1503.5 | 2 | 0 | 0 | 0.66086  | FALSE | 0 | ZNF654    | 2301520 | 0.576333 |
| 1503.5 | 2 | 0 | 0 | 0.66086  | FALSE | 0 | ZNF655    | 2301520 | 0.576333 |
| 1503.5 | 2 | 0 | 0 | 0.66086  | FALSE | 0 | ZNF800    | 2301520 | 0.576333 |
| 923.5  | 2 | 0 | 0 | 0.607957 | FALSE | 0 | ZNF827    | 884358  | 0.528351 |
| 1001.5 | 2 | 0 | 0 | 0.61576  | FALSE | 0 | ZSWIM6    | 1165610 | 0.53417  |
| 580.5  | 2 | 0 | 0 | 0.570538 | FALSE | 0 | AAED1     | 568360  | 0.509675 |
| 580.5  | 2 | 0 | 0 | 0.570538 | FALSE | 0 | ALG9      | 568360  | 0.509675 |
| 580.5  | 2 | 0 | 0 | 0.570538 | FALSE | 0 | AQR       | 568360  | 0.509675 |
| 1082.5 | 2 | 0 | 0 | 0.629339 | FALSE | 0 | ARL10     | 1343612 | 0.516476 |
| 393    | 2 | 0 | 0 | 0.545591 | FALSE | 0 | ASB16     | 191888  | 0.536252 |
| 393    | 2 | 0 | 0 | 0.545591 | FALSE | 0 | BLOC1S4   | 191888  | 0.536252 |
| 393    | 2 | 0 | 0 | 0.545591 | FALSE | 0 | C11orf54  | 191888  | 0.536252 |
| 393    | 2 | 0 | 0 | 0.545591 | FALSE | 0 | C11orf98  | 191888  | 0.536252 |
| 393    | 2 | 0 | 0 | 0.545591 | FALSE | 0 | C17orf105 | 191888  | 0.536252 |
| 695    | 2 | 0 | 0 | 0.583072 | FALSE | 0 | C1orf50   | 723770  | 0.517524 |
| 393    | 2 | 0 | 0 | 0.545591 | FALSE | 0 | C3        | 191888  | 0.536252 |
| 393    | 2 | 0 | 0 | 0.545591 | FALSE | 0 | CCDC38    | 191888  | 0.536252 |
| 371    | 2 | 0 | 0 | 0.544916 | FALSE | 0 | CCL16     | 215294  | 0.513889 |

|        |   |   |   |          |       |   |           |         |          |
|--------|---|---|---|----------|-------|---|-----------|---------|----------|
| 393    | 2 | 0 | 0 | 0.545591 | FALSE | 0 | CD209     | 191888  | 0.536252 |
| 619    | 2 | 0 | 0 | 0.575146 | FALSE | 0 | CD63      | 636926  | 0.509901 |
| 319    | 2 | 0 | 0 | 0.539201 | FALSE | 0 | CLMP      | 111468  | 0.507177 |
| 695    | 2 | 0 | 0 | 0.583072 | FALSE | 0 | COX6B1    | 723770  | 0.517524 |
| 1082.5 | 2 | 0 | 0 | 0.629339 | FALSE | 0 | CREB1     | 1343612 | 0.516476 |
| 695    | 2 | 0 | 0 | 0.583072 | FALSE | 0 | CSE1L     | 723770  | 0.517524 |
| 1082.5 | 2 | 0 | 0 | 0.629339 | FALSE | 0 | DNAL1     | 1343612 | 0.516476 |
| 393    | 2 | 0 | 0 | 0.545591 | FALSE | 0 | DUSP28    | 191888  | 0.536252 |
| 381    | 2 | 0 | 0 | 0.546759 | FALSE | 0 | EHD4      | 217316  | 0.506667 |
| 371    | 2 | 0 | 0 | 0.544916 | FALSE | 0 | ELOVL6    | 215294  | 0.513889 |
| 1082.5 | 2 | 0 | 0 | 0.629339 | FALSE | 0 | ENPP1     | 1343612 | 0.516476 |
| 619    | 2 | 0 | 0 | 0.575146 | FALSE | 0 | ENTPD1    | 636926  | 0.509901 |
| 619    | 2 | 0 | 0 | 0.575146 | FALSE | 0 | EPB41     | 636926  | 0.509901 |
| 580.5  | 2 | 0 | 0 | 0.570538 | FALSE | 0 | EPRS      | 568360  | 0.509675 |
| 695    | 2 | 0 | 0 | 0.583072 | FALSE | 0 | FAM241A   | 723770  | 0.517524 |
| 695    | 2 | 0 | 0 | 0.583072 | FALSE | 0 | FAXC      | 723770  | 0.517524 |
| 695    | 2 | 0 | 0 | 0.583072 | FALSE | 0 | GABPB2    | 723770  | 0.517524 |
| 319    | 2 | 0 | 0 | 0.539201 | FALSE | 0 | GJD3      | 111468  | 0.507177 |
| 502.5  | 2 | 0 | 0 | 0.561321 | FALSE | 0 | GLB1L3    | 435296  | 0.508105 |
| 695    | 2 | 0 | 0 | 0.583072 | FALSE | 0 | GNL3L     | 723770  | 0.517524 |
| 1082.5 | 2 | 0 | 0 | 0.629339 | FALSE | 0 | GPBP1L1   | 1343612 | 0.516476 |
| 281.5  | 2 | 0 | 0 | 0.535023 | FALSE | 0 | HAUS3     | 46870   | 0.501789 |
| 393    | 2 | 0 | 0 | 0.545591 | FALSE | 0 | HIST1H2AC | 191888  | 0.536252 |
| 580.5  | 2 | 0 | 0 | 0.570538 | FALSE | 0 | HIST1H2AF | 568360  | 0.509675 |
| 319    | 2 | 0 | 0 | 0.539201 | FALSE | 0 | HSD17B12  | 111468  | 0.507177 |
| 695    | 2 | 0 | 0 | 0.583072 | FALSE | 0 | IKZF3     | 723770  | 0.517524 |
| 619    | 2 | 0 | 0 | 0.575146 | FALSE | 0 | ISY1      | 636926  | 0.509901 |
| 371    | 2 | 0 | 0 | 0.544916 | FALSE | 0 | KIAA1958  | 215294  | 0.513889 |
| 1082.5 | 2 | 0 | 0 | 0.629339 | FALSE | 0 | KIF3A     | 1343612 | 0.516476 |
| 393    | 2 | 0 | 0 | 0.545591 | FALSE | 0 | LPIN3     | 191888  | 0.536252 |
| 371    | 2 | 0 | 0 | 0.544916 | FALSE | 0 | LRRC3C    | 215294  | 0.513889 |
| 695    | 2 | 0 | 0 | 0.583072 | FALSE | 0 | LYRM4     | 723770  | 0.517524 |
| 1082.5 | 2 | 0 | 0 | 0.629339 | FALSE | 0 | MBD3      | 1343612 | 0.516476 |
| 393    | 2 | 0 | 0 | 0.545591 | FALSE | 0 | MCF2L2    | 191888  | 0.536252 |
| 1082.5 | 2 | 0 | 0 | 0.629339 | FALSE | 0 | MFSD2A    | 1343612 | 0.516476 |
| 580.5  | 2 | 0 | 0 | 0.570538 | FALSE | 0 | MIXL1     | 568360  | 0.509675 |
| 381    | 2 | 0 | 0 | 0.546759 | FALSE | 0 | MOGAT1    | 217316  | 0.506667 |
| 381    | 2 | 0 | 0 | 0.546759 | FALSE | 0 | MPLKIP    | 217316  | 0.506667 |
| 619    | 2 | 0 | 0 | 0.575146 | FALSE | 0 | MPZL3     | 636926  | 0.509901 |
| 502.5  | 2 | 0 | 0 | 0.561321 | FALSE | 0 | MRNIP     | 435296  | 0.508105 |
| 393    | 2 | 0 | 0 | 0.545591 | FALSE | 0 | MRPS21    | 191888  | 0.536252 |
| 1082.5 | 2 | 0 | 0 | 0.629339 | FALSE | 0 | MTX3      | 1343612 | 0.516476 |
| 580.5  | 2 | 0 | 0 | 0.570538 | FALSE | 0 | MYO1C     | 568360  | 0.509675 |
| 695    | 2 | 0 | 0 | 0.583072 | FALSE | 0 | MYPN      | 723770  | 0.517524 |
| 619    | 2 | 0 | 0 | 0.575146 | FALSE | 0 | NEK9      | 636926  | 0.509901 |
| 393    | 2 | 0 | 0 | 0.545591 | FALSE | 0 | NOL9      | 191888  | 0.536252 |
| 695    | 2 | 0 | 0 | 0.583072 | FALSE | 0 | NUP155    | 723770  | 0.517524 |

|        |   |   |   |          |       |             |         |          |
|--------|---|---|---|----------|-------|-------------|---------|----------|
| 1082.5 | 2 | 0 | 0 | 0.629339 | FALSE | 0 NUP35     | 1343612 | 0.516476 |
| 695    | 2 | 0 | 0 | 0.583072 | FALSE | 0 OAS3      | 723770  | 0.517524 |
| 554.5  | 2 | 0 | 0 | 0.567097 | FALSE | 0 OLFML2A   | 512914  | 0.512026 |
| 695    | 2 | 0 | 0 | 0.583072 | FALSE | 0 OR7D2     | 723770  | 0.517524 |
| 1082.5 | 2 | 0 | 0 | 0.629339 | FALSE | 0 PAICS     | 1343612 | 0.516476 |
| 393    | 2 | 0 | 0 | 0.545591 | FALSE | 0 PCNP      | 191888  | 0.536252 |
| 381    | 2 | 0 | 0 | 0.546759 | FALSE | 0 PDCL3     | 217316  | 0.506667 |
| 1082.5 | 2 | 0 | 0 | 0.629339 | FALSE | 0 PGK1      | 1343612 | 0.516476 |
| 1082.5 | 2 | 0 | 0 | 0.629339 | FALSE | 0 PKNOX1    | 1343612 | 0.516476 |
| 318.5  | 2 | 0 | 0 | 0.539447 | FALSE | 0 POLA2     | 111932  | 0.50317  |
| 381    | 2 | 0 | 0 | 0.546759 | FALSE | 0 POLQ      | 217316  | 0.506667 |
| 695    | 2 | 0 | 0 | 0.583072 | FALSE | 0 PPIL4     | 723770  | 0.517524 |
| 1082.5 | 2 | 0 | 0 | 0.629339 | FALSE | 0 PRRG4     | 1343612 | 0.516476 |
| 280    | 2 | 0 | 0 | 0.5349   | FALSE | 0 PRX       | 77440   | 0.500898 |
| 580.5  | 2 | 0 | 0 | 0.570538 | FALSE | 0 RABGEF1   | 568360  | 0.509675 |
| 371    | 2 | 0 | 0 | 0.544916 | FALSE | 0 RBM23     | 215294  | 0.513889 |
| 393    | 2 | 0 | 0 | 0.545591 | FALSE | 0 RBM43     | 191888  | 0.536252 |
| 1082.5 | 2 | 0 | 0 | 0.629339 | FALSE | 0 RPL27A    | 1343612 | 0.516476 |
| 695    | 2 | 0 | 0 | 0.583072 | FALSE | 0 RPS19     | 723770  | 0.517524 |
| 371    | 2 | 0 | 0 | 0.544916 | FALSE | 0 SCARF1    | 215294  | 0.513889 |
| 1082.5 | 2 | 0 | 0 | 0.629339 | FALSE | 0 SEC63     | 1343612 | 0.516476 |
| 393    | 2 | 0 | 0 | 0.545591 | FALSE | 0 SEPHS1    | 191888  | 0.536252 |
| 549.5  | 2 | 0 | 0 | 0.566544 | FALSE | 0 SETD1A    | 501220  | 0.51166  |
| 393    | 2 | 0 | 0 | 0.545591 | FALSE | 0 SIGLEC9   | 191888  | 0.536252 |
| 695    | 2 | 0 | 0 | 0.583072 | FALSE | 0 SLC25A16  | 723770  | 0.517524 |
| 1082.5 | 2 | 0 | 0 | 0.629339 | FALSE | 0 SLC30A4   | 1343612 | 0.516476 |
| 393    | 2 | 0 | 0 | 0.545591 | FALSE | 0 SLX4      | 191888  | 0.536252 |
| 1082.5 | 2 | 0 | 0 | 0.629339 | FALSE | 0 SPRYD4    | 1343612 | 0.516476 |
| 695    | 2 | 0 | 0 | 0.583072 | FALSE | 0 STAR      | 723770  | 0.517524 |
| 319    | 2 | 0 | 0 | 0.539201 | FALSE | 0 STX7      | 111468  | 0.507177 |
| 619    | 2 | 0 | 0 | 0.575146 | FALSE | 0 TAF8      | 636926  | 0.509901 |
| 1082.5 | 2 | 0 | 0 | 0.629339 | FALSE | 0 TIMELESS  | 1343612 | 0.516476 |
| 1082.5 | 2 | 0 | 0 | 0.629339 | FALSE | 0 TIPIN     | 1343612 | 0.516476 |
| 619    | 2 | 0 | 0 | 0.575146 | FALSE | 0 TMCO1     | 636926  | 0.509901 |
| 393    | 2 | 0 | 0 | 0.545591 | FALSE | 0 TMEM120I  | 191888  | 0.536252 |
| 554.5  | 2 | 0 | 0 | 0.567097 | FALSE | 0 TMEM67    | 512914  | 0.512026 |
| 393    | 2 | 0 | 0 | 0.545591 | FALSE | 0 TNFRSF10A | 191888  | 0.536252 |
| 393    | 2 | 0 | 0 | 0.545591 | FALSE | 0 TNFRSF13C | 191888  | 0.536252 |
| 319    | 2 | 0 | 0 | 0.539201 | FALSE | 0 TRAF1     | 111468  | 0.507177 |
| 393    | 2 | 0 | 0 | 0.545591 | FALSE | 0 TRAPPC2   | 191888  | 0.536252 |
| 502.5  | 2 | 0 | 0 | 0.561321 | FALSE | 0 TRIM65    | 435296  | 0.508105 |
| 695    | 2 | 0 | 0 | 0.583072 | FALSE | 0 TRMT2B    | 723770  | 0.517524 |
| 393    | 2 | 0 | 0 | 0.545591 | FALSE | 0 VPS53     | 191888  | 0.536252 |
| 371    | 2 | 0 | 0 | 0.544916 | FALSE | 0 ZADH2     | 215294  | 0.513889 |
| 393    | 2 | 0 | 0 | 0.545591 | FALSE | 0 ZBTB8B    | 191888  | 0.536252 |
| 1082.5 | 2 | 0 | 0 | 0.629339 | FALSE | 0 ZNF138    | 1343612 | 0.516476 |
| 695    | 2 | 0 | 0 | 0.583072 | FALSE | 0 ZNF417    | 723770  | 0.517524 |



|         |     |   |   |          |       |              |          |          |
|---------|-----|---|---|----------|-------|--------------|----------|----------|
| 1082.5  | 2   | 0 | 0 | 0.629339 | FALSE | 0 ZNF460     | 1343612  | 0.516476 |
| 381     | 2   | 0 | 0 | 0.546759 | FALSE | 0 ZNF543     | 217316   | 0.506667 |
| 393     | 2   | 0 | 0 | 0.545591 | FALSE | 0 ZNF556     | 191888   | 0.536252 |
| 393     | 2   | 0 | 0 | 0.545591 | FALSE | 0 ZNF566     | 191888   | 0.536252 |
| 302     | 2   | 0 | 0 | 0.537419 | FALSE | 0 ZNF652     | 89336    | 0.503344 |
| 798     | 2   | 0 | 0 | 0.592166 | FALSE | 0 3-Sep      | 864690   | 0.535259 |
| 1261.5  | 2   | 0 | 0 | 0.643287 | FALSE | 0 9-Mar      | 1822652  | 0.543085 |
| 759.5   | 2   | 0 | 0 | 0.588172 | FALSE | 0 AARS       | 782330   | 0.532654 |
| 1261.5  | 2   | 0 | 0 | 0.643287 | FALSE | 0 ABAT       | 1822652  | 0.543085 |
| 1261.5  | 2   | 0 | 0 | 0.643287 | FALSE | 0 ACD        | 1822652  | 0.543085 |
| 1261.5  | 2   | 0 | 0 | 0.643287 | FALSE | 0 AGPAT3     | 1822652  | 0.543085 |
| 1261.5  | 2   | 0 | 0 | 0.643287 | FALSE | 0 AMOTL1     | 1822652  | 0.543085 |
| 560     | 2   | 0 | 0 | 0.567465 | FALSE | 0 APAF1      | 318284   | 0.514259 |
| 481     | 2   | 0 | 0 | 0.559171 | FALSE | 0 APOL6      | 151164   | 0.504202 |
| 1261.5  | 2   | 0 | 0 | 0.643287 | FALSE | 0 ARRDC3     | 1822652  | 0.543085 |
| 485.5   | 2   | 0 | 0 | 0.559601 | FALSE | 0 ASB8       | 316858   | 0.505214 |
| 759.5   | 2   | 0 | 0 | 0.588172 | FALSE | 0 ASPH       | 782330   | 0.532654 |
| 1261.5  | 2   | 0 | 0 | 0.643287 | FALSE | 0 ASXL2      | 1822652  | 0.543085 |
| 550     | 2   | 0 | 0 | 0.566667 | FALSE | 0 ATF7       | 376666   | 0.511173 |
| 1261.5  | 2   | 0 | 0 | 0.643287 | FALSE | 0 ATP2B4     | 1822652  | 0.543085 |
| 1261.5  | 2   | 0 | 0 | 0.643287 | FALSE | 0 ATXN7      | 1822652  | 0.543085 |
| 681.5   | 2   | 0 | 0 | 0.580553 | FALSE | 0 BCL2       | 617068   | 0.523462 |
| 1261.5  | 2   | 0 | 0 | 0.643287 | FALSE | 0 BCL3       | 1822652  | 0.543085 |
| 759.5   | 2   | 0 | 0 | 0.588172 | FALSE | 0 BLOC1S5-T  | 782330   | 0.532654 |
| 759.5   | 2   | 0 | 0 | 0.588172 | FALSE | 0 BNIP3      | 782330   | 0.532654 |
| 550     | 2   | 0 | 0 | 0.566667 | FALSE | 0 CANX       | 376666   | 0.511173 |
| 798     | 2   | 0 | 0 | 0.592166 | FALSE | 0 CASP4      | 864690   | 0.535259 |
| 1261.5  | 2   | 0 | 0 | 0.643287 | FALSE | 0 CAST       | 1822652  | 0.543085 |
| 733.5   | 2   | 0 | 0 | 0.585776 | FALSE | 0 CD83       | 719982   | 0.528881 |
| 481     | 2   | 0 | 0 | 0.559171 | FALSE | 0 COMMD2     | 151164   | 0.504202 |
| 485.5   | 2   | 0 | 0 | 0.559601 | FALSE | 0 CPA4       | 316858   | 0.505214 |
| 798     | 2   | 0 | 0 | 0.592166 | FALSE | 0 CSRNP2     | 864690   | 0.535259 |
| 485.5   | 2   | 0 | 0 | 0.559601 | FALSE | 0 CTNNA1     | 316858   | 0.505214 |
| 759.5   | 2   | 0 | 0 | 0.588172 | FALSE | 0 CTNND1     | 782330   | 0.532654 |
| 733.5   | 2   | 0 | 0 | 0.585776 | FALSE | 0 CXCL12     | 719982   | 0.528881 |
| 1261.5  | 2   | 0 | 0 | 0.643287 | FALSE | 0 DAD1       | 1822652  | 0.543085 |
| 1261.5  | 2   | 0 | 0 | 0.643287 | FALSE | 0 DBF4       | 1822652  | 0.543085 |
| 1261.5  | 2   | 0 | 0 | 0.643287 | FALSE | 0 DHX30      | 1822652  | 0.543085 |
| 1261.5  | 2   | 0 | 0 | 0.643287 | FALSE | 0 DRAM1      | 1822652  | 0.543085 |
| 1261.5  | 2   | 0 | 0 | 0.643287 | FALSE | 0 E2F8       | 1822652  | 0.543085 |
| 681.5   | 2   | 0 | 0 | 0.580553 | FALSE | 0 EEF1D      | 617068   | 0.523462 |
| 1261.5  | 2   | 0 | 0 | 0.643287 | FALSE | 0 EIF1AD     | 1822652  | 0.543085 |
| 1261.5  | 2   | 0 | 0 | 0.643287 | FALSE | 0 EIF2AK1    | 1822652  | 0.543085 |
| 798     | 2   | 0 | 0 | 0.592166 | FALSE | 0 EIF4G1     | 864690   | 0.535259 |
| 1.80814 | 516 | 0 | 0 | 0.698894 | TRUE  | 0 hsa-miR-12 | 2.84E+08 | 0.047538 |
| 1261.5  | 2   | 0 | 0 | 0.643287 | FALSE | 0 ELL2       | 1822652  | 0.543085 |
| 1261.5  | 2   | 0 | 0 | 0.643287 | FALSE | 0 ELOVL5     | 1822652  | 0.543085 |

|        |   |   |   |          |       |   |           |         |          |
|--------|---|---|---|----------|-------|---|-----------|---------|----------|
| 1261.5 | 2 | 0 | 0 | 0.643287 | FALSE | 0 | EPG5      | 1822652 | 0.543085 |
| 759.5  | 2 | 0 | 0 | 0.588172 | FALSE | 0 | ERBB3     | 782330  | 0.532654 |
| 460.5  | 2 | 0 | 0 | 0.556713 | FALSE | 0 | ESYT2     | 73056   | 0.503838 |
| 1261.5 | 2 | 0 | 0 | 0.643287 | FALSE | 0 | FAM102A   | 1822652 | 0.543085 |
| 560    | 2 | 0 | 0 | 0.567465 | FALSE | 0 | FAM107B   | 318284  | 0.514259 |
| 759.5  | 2 | 0 | 0 | 0.588172 | FALSE | 0 | FAM127B   | 782330  | 0.532654 |
| 1261.5 | 2 | 0 | 0 | 0.643287 | FALSE | 0 | FAM134C   | 1822652 | 0.543085 |
| 550    | 2 | 0 | 0 | 0.566667 | FALSE | 0 | FAM83H    | 376666  | 0.511173 |
| 572    | 2 | 0 | 0 | 0.569739 | FALSE | 0 | FNBP1     | 396272  | 0.508007 |
| 681.5  | 2 | 0 | 0 | 0.580553 | FALSE | 0 | FNDC3B    | 617068  | 0.523462 |
| 798    | 2 | 0 | 0 | 0.592166 | FALSE | 0 | FOXMI     | 864690  | 0.535259 |
| 1261.5 | 2 | 0 | 0 | 0.643287 | FALSE | 0 | GABARAPL  | 1822652 | 0.543085 |
| 1261.5 | 2 | 0 | 0 | 0.643287 | FALSE | 0 | GALNT6    | 1822652 | 0.543085 |
| 681.5  | 2 | 0 | 0 | 0.580553 | FALSE | 0 | GAS1      | 617068  | 0.523462 |
| 1261.5 | 2 | 0 | 0 | 0.643287 | FALSE | 0 | GFPT1     | 1822652 | 0.543085 |
| 560    | 2 | 0 | 0 | 0.567465 | FALSE | 0 | GGA2      | 318284  | 0.514259 |
| 798    | 2 | 0 | 0 | 0.592166 | FALSE | 0 | GLI2      | 864690  | 0.535259 |
| 759.5  | 2 | 0 | 0 | 0.588172 | FALSE | 0 | GLUL      | 782330  | 0.532654 |
| 560    | 2 | 0 | 0 | 0.567465 | FALSE | 0 | GPATCH8   | 318284  | 0.514259 |
| 798    | 2 | 0 | 0 | 0.592166 | FALSE | 0 | GPD1L     | 864690  | 0.535259 |
| 1261.5 | 2 | 0 | 0 | 0.643287 | FALSE | 0 | HDLBP     | 1822652 | 0.543085 |
| 759.5  | 2 | 0 | 0 | 0.588172 | FALSE | 0 | HIPK2     | 782330  | 0.532654 |
| 1261.5 | 2 | 0 | 0 | 0.643287 | FALSE | 0 | HIST1H2BC | 1822652 | 0.543085 |
| 759.5  | 2 | 0 | 0 | 0.588172 | FALSE | 0 | HK2       | 782330  | 0.532654 |
| 681.5  | 2 | 0 | 0 | 0.580553 | FALSE | 0 | HNF4A     | 617068  | 0.523462 |
| 759.5  | 2 | 0 | 0 | 0.588172 | FALSE | 0 | JAG1      | 782330  | 0.532654 |
| 572    | 2 | 0 | 0 | 0.569739 | FALSE | 0 | KAT7      | 396272  | 0.508007 |
| 1261.5 | 2 | 0 | 0 | 0.643287 | FALSE | 0 | KDM2A     | 1822652 | 0.543085 |
| 728.5  | 2 | 0 | 0 | 0.584547 | FALSE | 0 | KIAA0430  | 684212  | 0.532967 |
| 1261.5 | 2 | 0 | 0 | 0.643287 | FALSE | 0 | KIAA0930  | 1822652 | 0.543085 |
| 759.5  | 2 | 0 | 0 | 0.588172 | FALSE | 0 | KLF5      | 782330  | 0.532654 |
| 798    | 2 | 0 | 0 | 0.592166 | FALSE | 0 | KRAS      | 864690  | 0.535259 |
| 1261.5 | 2 | 0 | 0 | 0.643287 | FALSE | 0 | LAMC1     | 1822652 | 0.543085 |
| 798    | 2 | 0 | 0 | 0.592166 | FALSE | 0 | LCT       | 864690  | 0.535259 |
| 759.5  | 2 | 0 | 0 | 0.588172 | FALSE | 0 | LILRB1    | 782330  | 0.532654 |
| 798    | 2 | 0 | 0 | 0.592166 | FALSE | 0 | LIMD1     | 864690  | 0.535259 |
| 497.5  | 2 | 0 | 0 | 0.560461 | FALSE | 0 | LRRC2     | 157982  | 0.510277 |
| 681.5  | 2 | 0 | 0 | 0.580553 | FALSE | 0 | LRRC41    | 617068  | 0.523462 |
| 550    | 2 | 0 | 0 | 0.566667 | FALSE | 0 | LURAP1L   | 376666  | 0.511173 |
| 1261.5 | 2 | 0 | 0 | 0.643287 | FALSE | 0 | MARS2     | 1822652 | 0.543085 |
| 759.5  | 2 | 0 | 0 | 0.588172 | FALSE | 0 | MCM2      | 782330  | 0.532654 |
| 681.5  | 2 | 0 | 0 | 0.580553 | FALSE | 0 | MCM3AP    | 617068  | 0.523462 |
| 560    | 2 | 0 | 0 | 0.567465 | FALSE | 0 | MCOLN2    | 318284  | 0.514259 |
| 798    | 2 | 0 | 0 | 0.592166 | FALSE | 0 | MED22     | 864690  | 0.535259 |
| 759.5  | 2 | 0 | 0 | 0.588172 | FALSE | 0 | MMP14     | 782330  | 0.532654 |
| 759.5  | 2 | 0 | 0 | 0.588172 | FALSE | 0 | MMP9      | 782330  | 0.532654 |
| 481    | 2 | 0 | 0 | 0.559171 | FALSE | 0 | MTA3      | 151164  | 0.504202 |

|        |   |   |   |          |       |   |          |         |          |
|--------|---|---|---|----------|-------|---|----------|---------|----------|
| 733.5  | 2 | 0 | 0 | 0.585776 | FALSE | 0 | MVD      | 719982  | 0.528881 |
| 798    | 2 | 0 | 0 | 0.592166 | FALSE | 0 | MYCBP    | 864690  | 0.535259 |
| 1261.5 | 2 | 0 | 0 | 0.643287 | FALSE | 0 | NAPEPLD  | 1822652 | 0.543085 |
| 733.5  | 2 | 0 | 0 | 0.585776 | FALSE | 0 | NFAT5    | 719982  | 0.528881 |
| 759.5  | 2 | 0 | 0 | 0.588172 | FALSE | 0 | NFATC1   | 782330  | 0.532654 |
| 798    | 2 | 0 | 0 | 0.592166 | FALSE | 0 | NFYB     | 864690  | 0.535259 |
| 1261.5 | 2 | 0 | 0 | 0.643287 | FALSE | 0 | NIPBL    | 1822652 | 0.543085 |
| 733.5  | 2 | 0 | 0 | 0.585776 | FALSE | 0 | NOS1     | 719982  | 0.528881 |
| 1261.5 | 2 | 0 | 0 | 0.643287 | FALSE | 0 | NR2C2    | 1822652 | 0.543085 |
| 798    | 2 | 0 | 0 | 0.592166 | FALSE | 0 | NR2F1    | 864690  | 0.535259 |
| 681.5  | 2 | 0 | 0 | 0.580553 | FALSE | 0 | NUDT3    | 617068  | 0.523462 |
| 759.5  | 2 | 0 | 0 | 0.588172 | FALSE | 0 | PDE3A    | 782330  | 0.532654 |
| 550    | 2 | 0 | 0 | 0.566667 | FALSE | 0 | PDE4DIP  | 376666  | 0.511173 |
| 498    | 2 | 0 | 0 | 0.560952 | FALSE | 0 | PDIA5    | 178228  | 0.506626 |
| 1261.5 | 2 | 0 | 0 | 0.643287 | FALSE | 0 | PFN1     | 1822652 | 0.543085 |
| 1261.5 | 2 | 0 | 0 | 0.643287 | FALSE | 0 | PIK3R1   | 1822652 | 0.543085 |
| 1261.5 | 2 | 0 | 0 | 0.643287 | FALSE | 0 | POGZ     | 1822652 | 0.543085 |
| 681.5  | 2 | 0 | 0 | 0.580553 | FALSE | 0 | PTPN11   | 617068  | 0.523462 |
| 681.5  | 2 | 0 | 0 | 0.580553 | FALSE | 0 | PTPN23   | 617068  | 0.523462 |
| 1261.5 | 2 | 0 | 0 | 0.643287 | FALSE | 0 | PXDN     | 1822652 | 0.543085 |
| 1261.5 | 2 | 0 | 0 | 0.643287 | FALSE | 0 | RAN      | 1822652 | 0.543085 |
| 681.5  | 2 | 0 | 0 | 0.580553 | FALSE | 0 | RARG     | 617068  | 0.523462 |
| 1261.5 | 2 | 0 | 0 | 0.643287 | FALSE | 0 | RCOR1    | 1822652 | 0.543085 |
| 681.5  | 2 | 0 | 0 | 0.580553 | FALSE | 0 | RGP1     | 617068  | 0.523462 |
| 572    | 2 | 0 | 0 | 0.569739 | FALSE | 0 | RPP30    | 396272  | 0.508007 |
| 572    | 2 | 0 | 0 | 0.569739 | FALSE | 0 | RRP7A    | 396272  | 0.508007 |
| 1261.5 | 2 | 0 | 0 | 0.643287 | FALSE | 0 | SDC1     | 1822652 | 0.543085 |
| 733.5  | 2 | 0 | 0 | 0.585776 | FALSE | 0 | SDCBP    | 719982  | 0.528881 |
| 550    | 2 | 0 | 0 | 0.566667 | FALSE | 0 | SENP2    | 376666  | 0.511173 |
| 759.5  | 2 | 0 | 0 | 0.588172 | FALSE | 0 | SENP5    | 782330  | 0.532654 |
| 798    | 2 | 0 | 0 | 0.592166 | FALSE | 0 | SKAP2    | 864690  | 0.535259 |
| 759.5  | 2 | 0 | 0 | 0.588172 | FALSE | 0 | SLC25A25 | 782330  | 0.532654 |
| 550    | 2 | 0 | 0 | 0.566667 | FALSE | 0 | SLC25A36 | 376666  | 0.511173 |
| 1261.5 | 2 | 0 | 0 | 0.643287 | FALSE | 0 | SLC25A44 | 1822652 | 0.543085 |
| 560    | 2 | 0 | 0 | 0.567465 | FALSE | 0 | SLC25A46 | 318284  | 0.514259 |
| 759.5  | 2 | 0 | 0 | 0.588172 | FALSE | 0 | SLC7A6   | 782330  | 0.532654 |
| 798    | 2 | 0 | 0 | 0.592166 | FALSE | 0 | SMARCC1  | 864690  | 0.535259 |
| 1261.5 | 2 | 0 | 0 | 0.643287 | FALSE | 0 | SMARCD2  | 1822652 | 0.543085 |
| 798    | 2 | 0 | 0 | 0.592166 | FALSE | 0 | SMC1A    | 864690  | 0.535259 |
| 681.5  | 2 | 0 | 0 | 0.580553 | FALSE | 0 | SOAT1    | 617068  | 0.523462 |
| 1261.5 | 2 | 0 | 0 | 0.643287 | FALSE | 0 | SOCS4    | 1822652 | 0.543085 |
| 460.5  | 2 | 0 | 0 | 0.556713 | FALSE | 0 | SSH2     | 73056   | 0.503838 |
| 1261.5 | 2 | 0 | 0 | 0.643287 | FALSE | 0 | STOX2    | 1822652 | 0.543085 |
| 550    | 2 | 0 | 0 | 0.566667 | FALSE | 0 | SYT7     | 376666  | 0.511173 |
| 498    | 2 | 0 | 0 | 0.560952 | FALSE | 0 | TAF1D    | 178228  | 0.506626 |
| 681.5  | 2 | 0 | 0 | 0.580553 | FALSE | 0 | TAOK2    | 617068  | 0.523462 |
| 798    | 2 | 0 | 0 | 0.592166 | FALSE | 0 | TERT     | 864690  | 0.535259 |

|        |   |   |   |          |       |   |           |         |          |
|--------|---|---|---|----------|-------|---|-----------|---------|----------|
| 1261.5 | 2 | 0 | 0 | 0.643287 | FALSE | 0 | TMEM178I  | 1822652 | 0.543085 |
| 1261.5 | 2 | 0 | 0 | 0.643287 | FALSE | 0 | TNF       | 1822652 | 0.543085 |
| 1261.5 | 2 | 0 | 0 | 0.643287 | FALSE | 0 | TNFRSF10E | 1822652 | 0.543085 |
| 1261.5 | 2 | 0 | 0 | 0.643287 | FALSE | 0 | TNIP1     | 1822652 | 0.543085 |
| 1261.5 | 2 | 0 | 0 | 0.643287 | FALSE | 0 | TRIM33    | 1822652 | 0.543085 |
| 681.5  | 2 | 0 | 0 | 0.580553 | FALSE | 0 | TUBB      | 617068  | 0.523462 |
| 1261.5 | 2 | 0 | 0 | 0.643287 | FALSE | 0 | UBAP2L    | 1822652 | 0.543085 |
| 560    | 2 | 0 | 0 | 0.567465 | FALSE | 0 | UBE2V2    | 318284  | 0.514259 |
| 1261.5 | 2 | 0 | 0 | 0.643287 | FALSE | 0 | USP12     | 1822652 | 0.543085 |
| 560    | 2 | 0 | 0 | 0.567465 | FALSE | 0 | USP42     | 318284  | 0.514259 |
| 1261.5 | 2 | 0 | 0 | 0.643287 | FALSE | 0 | USP6NL    | 1822652 | 0.543085 |
| 1261.5 | 2 | 0 | 0 | 0.643287 | FALSE | 0 | VPS45     | 1822652 | 0.543085 |
| 798    | 2 | 0 | 0 | 0.592166 | FALSE | 0 | WDR6      | 864690  | 0.535259 |
| 550    | 2 | 0 | 0 | 0.566667 | FALSE | 0 | YARS      | 376666  | 0.511173 |
| 728.5  | 2 | 0 | 0 | 0.584547 | FALSE | 0 | YWHAB     | 684212  | 0.532967 |
| 733.5  | 2 | 0 | 0 | 0.585776 | FALSE | 0 | ZBTB22    | 719982  | 0.528881 |
| 560    | 2 | 0 | 0 | 0.567465 | FALSE | 0 | ZC3H14    | 318284  | 0.514259 |
| 572    | 2 | 0 | 0 | 0.569739 | FALSE | 0 | ZC3HAV1L  | 396272  | 0.508007 |
| 560    | 2 | 0 | 0 | 0.567465 | FALSE | 0 | ZFP36L1   | 318284  | 0.514259 |
| 1261.5 | 2 | 0 | 0 | 0.643287 | FALSE | 0 | ZIC5      | 1822652 | 0.543085 |
| 1261.5 | 2 | 0 | 0 | 0.643287 | FALSE | 0 | ZMIZ2     | 1822652 | 0.543085 |
| 798    | 2 | 0 | 0 | 0.592166 | FALSE | 0 | ZNF277    | 864690  | 0.535259 |
| 728.5  | 2 | 0 | 0 | 0.584547 | FALSE | 0 | ZNF3      | 684212  | 0.532967 |
| 1261.5 | 2 | 0 | 0 | 0.643287 | FALSE | 0 | ZNF503    | 1822652 | 0.543085 |
| 572    | 2 | 0 | 0 | 0.569739 | FALSE | 0 | ZNF708    | 396272  | 0.508007 |
| 798    | 2 | 0 | 0 | 0.592166 | FALSE | 0 | ZNF709    | 864690  | 0.535259 |
| 1261.5 | 2 | 0 | 0 | 0.643287 | FALSE | 0 | ZNF711    | 1822652 | 0.543085 |
| 1261.5 | 2 | 0 | 0 | 0.643287 | FALSE | 0 | ZNF83     | 1822652 | 0.543085 |
| 572    | 2 | 0 | 0 | 0.569739 | FALSE | 0 | ZNF878    | 396272  | 0.508007 |
| 798    | 2 | 0 | 0 | 0.592166 | FALSE | 0 | ZNFX1     | 864690  | 0.535259 |
| 885    | 2 | 0 | 0 | 0.607588 | FALSE | 0 | AFTPH     | 280694  | 0.508046 |
| 885    | 2 | 0 | 0 | 0.607588 | FALSE | 0 | AKAP2     | 280694  | 0.508046 |
| 421.5  | 2 | 0 | 0 | 0.55149  | FALSE | 0 | BUB1      | 146494  | 0.508464 |
| 121.5  | 2 | 0 | 0 | 0.513886 | FALSE | 0 | C8orf37   | 23896   | 0.508439 |
| 383    | 2 | 0 | 0 | 0.546144 | FALSE | 0 | DESI1     | 114106  | 0.516216 |
| 183.5  | 2 | 0 | 0 | 0.522857 | FALSE | 0 | DHX36     | 53336   | 0.50554  |
| 173.5  | 2 | 0 | 0 | 0.521505 | FALSE | 0 | DNAJC10   | 66442   | 0.50885  |
| 885    | 2 | 0 | 0 | 0.607588 | FALSE | 0 | EIF4E2    | 280694  | 0.508046 |
| 305    | 2 | 0 | 0 | 0.537604 | FALSE | 0 | FNIP2     | 104964  | 0.505824 |
| 885    | 2 | 0 | 0 | 0.607588 | FALSE | 0 | LGALSL    | 280694  | 0.508046 |
| 104.5  | 2 | 0 | 0 | 0.513333 | FALSE | 0 | LOX       | 27360   | 0.502427 |
| 352    | 2 | 0 | 0 | 0.543072 | FALSE | 0 | MMP16     | 112772  | 0.508696 |
| 383    | 2 | 0 | 0 | 0.546144 | FALSE | 0 | MTDH      | 114106  | 0.516216 |
| 885    | 2 | 0 | 0 | 0.607588 | FALSE | 0 | PALM2-AK  | 280694  | 0.508046 |
| 885    | 2 | 0 | 0 | 0.607588 | FALSE | 0 | PLXNC1    | 280694  | 0.508046 |
| 305    | 2 | 0 | 0 | 0.537604 | FALSE | 0 | POLL      | 104964  | 0.505824 |
| 421.5  | 2 | 0 | 0 | 0.55149  | FALSE | 0 | PRKAG1    | 146494  | 0.508464 |

|       |   |   |   |          |       |            |         |          |
|-------|---|---|---|----------|-------|------------|---------|----------|
| 121.5 | 2 | 0 | 0 | 0.513886 | FALSE | 0 RPS4X    | 23896   | 0.508439 |
| 383   | 2 | 0 | 0 | 0.546144 | FALSE | 0 SERPINA1 | 114106  | 0.516216 |
| 183.5 | 2 | 0 | 0 | 0.522857 | FALSE | 0 SLC38A9  | 53336   | 0.50554  |
| 885   | 2 | 0 | 0 | 0.607588 | FALSE | 0 STK38    | 280694  | 0.508046 |
| 885   | 2 | 0 | 0 | 0.607588 | FALSE | 0 TACSTD2  | 280694  | 0.508046 |
| 885   | 2 | 0 | 0 | 0.607588 | FALSE | 0 TMEM106i | 280694  | 0.508046 |
| 885   | 2 | 0 | 0 | 0.607588 | FALSE | 0 TRIM23   | 280694  | 0.508046 |
| 383   | 2 | 0 | 0 | 0.546144 | FALSE | 0 ZNF37A   | 114106  | 0.516216 |
| 121.5 | 2 | 0 | 0 | 0.513886 | FALSE | 0 ZSCAN16  | 23896   | 0.508439 |
| 1147  | 2 | 0 | 0 | 0.632412 | FALSE | 0 ABCA1    | 1388934 | 0.534515 |
| 683.5 | 2 | 0 | 0 | 0.58043  | FALSE | 0 ABCC1    | 679494  | 0.525809 |
| 683.5 | 2 | 0 | 0 | 0.58043  | FALSE | 0 ACTR2    | 679494  | 0.525809 |
| 1147  | 2 | 0 | 0 | 0.632412 | FALSE | 0 ADD3     | 1388934 | 0.534515 |
| 371   | 2 | 0 | 0 | 0.545346 | FALSE | 0 ALDH18A1 | 227788  | 0.508941 |
| 683.5 | 2 | 0 | 0 | 0.58043  | FALSE | 0 ANPEP    | 679494  | 0.525809 |
| 1147  | 2 | 0 | 0 | 0.632412 | FALSE | 0 ARL6IP5  | 1388934 | 0.534515 |
| 383.5 | 2 | 0 | 0 | 0.546882 | FALSE | 0 ATP9A    | 135252  | 0.508644 |
| 683.5 | 2 | 0 | 0 | 0.58043  | FALSE | 0 ATRN     | 679494  | 0.525809 |
| 1147  | 2 | 0 | 0 | 0.632412 | FALSE | 0 BTG1     | 1388934 | 0.534515 |
| 567   | 2 | 0 | 0 | 0.567158 | FALSE | 0 C15orf39 | 464870  | 0.523105 |
| 445.5 | 2 | 0 | 0 | 0.553948 | FALSE | 0 CAV2     | 245266  | 0.512687 |
| 683.5 | 2 | 0 | 0 | 0.58043  | FALSE | 0 CDCP1    | 679494  | 0.525809 |
| 567   | 2 | 0 | 0 | 0.567158 | FALSE | 0 CDH1     | 464870  | 0.523105 |
| 1147  | 2 | 0 | 0 | 0.632412 | FALSE | 0 CITED2   | 1388934 | 0.534515 |
| 567   | 2 | 0 | 0 | 0.567158 | FALSE | 0 CLDN12   | 464870  | 0.523105 |
| 683.5 | 2 | 0 | 0 | 0.58043  | FALSE | 0 COL6A1   | 679494  | 0.525809 |
| 683.5 | 2 | 0 | 0 | 0.58043  | FALSE | 0 CORO1C   | 679494  | 0.525809 |
| 1147  | 2 | 0 | 0 | 0.632412 | FALSE | 0 CSRN3    | 1388934 | 0.534515 |
| 683.5 | 2 | 0 | 0 | 0.58043  | FALSE | 0 CTNBP1   | 679494  | 0.525809 |
| 371   | 2 | 0 | 0 | 0.545346 | FALSE | 0 DFFA     | 227788  | 0.508941 |
| 1147  | 2 | 0 | 0 | 0.632412 | FALSE | 0 DYNC1H1  | 1388934 | 0.534515 |
| 445.5 | 2 | 0 | 0 | 0.553948 | FALSE | 0 EIF4E    | 245266  | 0.512687 |
| 1147  | 2 | 0 | 0 | 0.632412 | FALSE | 0 EIF4G3   | 1388934 | 0.534515 |
| 683.5 | 2 | 0 | 0 | 0.58043  | FALSE | 0 ENAH     | 679494  | 0.525809 |
| 567   | 2 | 0 | 0 | 0.567158 | FALSE | 0 ENTPD6   | 464870  | 0.523105 |
| 1147  | 2 | 0 | 0 | 0.632412 | FALSE | 0 ESR1     | 1388934 | 0.534515 |
| 1147  | 2 | 0 | 0 | 0.632412 | FALSE | 0 EWSR1    | 1388934 | 0.534515 |
| 445.5 | 2 | 0 | 0 | 0.553948 | FALSE | 0 FAM3C    | 245266  | 0.512687 |
| 1147  | 2 | 0 | 0 | 0.632412 | FALSE | 0 FN3KRP   | 1388934 | 0.534515 |
| 457.5 | 2 | 0 | 0 | 0.556221 | FALSE | 0 FXN      | 305368  | 0.504978 |
| 1147  | 2 | 0 | 0 | 0.632412 | FALSE | 0 GOLM1    | 1388934 | 0.534515 |
| 371   | 2 | 0 | 0 | 0.545346 | FALSE | 0 GPRASP1  | 227788  | 0.508941 |
| 683.5 | 2 | 0 | 0 | 0.58043  | FALSE | 0 GRN      | 679494  | 0.525809 |
| 1147  | 2 | 0 | 0 | 0.632412 | FALSE | 0 HECW2    | 1388934 | 0.534515 |
| 1147  | 2 | 0 | 0 | 0.632412 | FALSE | 0 HIF1A    | 1388934 | 0.534515 |
| 371   | 2 | 0 | 0 | 0.545346 | FALSE | 0 HMG20A   | 227788  | 0.508941 |
| 683.5 | 2 | 0 | 0 | 0.58043  | FALSE | 0 HMGA1    | 679494  | 0.525809 |

|       |   |   |   |          |       |   |          |         |          |
|-------|---|---|---|----------|-------|---|----------|---------|----------|
| 1147  | 2 | 0 | 0 | 0.632412 | FALSE | 0 | HNRNPC   | 1388934 | 0.534515 |
| 683.5 | 2 | 0 | 0 | 0.58043  | FALSE | 0 | HSPA8    | 679494  | 0.525809 |
| 1147  | 2 | 0 | 0 | 0.632412 | FALSE | 0 | IBTK     | 1388934 | 0.534515 |
| 567   | 2 | 0 | 0 | 0.567158 | FALSE | 0 | IGFBP4   | 464870  | 0.523105 |
| 683.5 | 2 | 0 | 0 | 0.58043  | FALSE | 0 | IL24     | 679494  | 0.525809 |
| 683.5 | 2 | 0 | 0 | 0.58043  | FALSE | 0 | INPPL1   | 679494  | 0.525809 |
| 1147  | 2 | 0 | 0 | 0.632412 | FALSE | 0 | IRS2     | 1388934 | 0.534515 |
| 567   | 2 | 0 | 0 | 0.567158 | FALSE | 0 | ITGA11   | 464870  | 0.523105 |
| 445.5 | 2 | 0 | 0 | 0.553948 | FALSE | 0 | ITSN1    | 245266  | 0.512687 |
| 1147  | 2 | 0 | 0 | 0.632412 | FALSE | 0 | JADE1    | 1388934 | 0.534515 |
| 1147  | 2 | 0 | 0 | 0.632412 | FALSE | 0 | JUNB     | 1388934 | 0.534515 |
| 614   | 2 | 0 | 0 | 0.572934 | FALSE | 0 | KCTD3    | 551948  | 0.521259 |
| 614   | 2 | 0 | 0 | 0.572934 | FALSE | 0 | KLF4     | 551948  | 0.521259 |
| 1147  | 2 | 0 | 0 | 0.632412 | FALSE | 0 | LARS     | 1388934 | 0.534515 |
| 371   | 2 | 0 | 0 | 0.545346 | FALSE | 0 | MADD     | 227788  | 0.508941 |
| 567   | 2 | 0 | 0 | 0.567158 | FALSE | 0 | MLLT1    | 464870  | 0.523105 |
| 346   | 2 | 0 | 0 | 0.542704 | FALSE | 0 | MYRF     | 61302   | 0.504386 |
| 567   | 2 | 0 | 0 | 0.567158 | FALSE | 0 | NANOG    | 464870  | 0.523105 |
| 1147  | 2 | 0 | 0 | 0.632412 | FALSE | 0 | NCOA2    | 1388934 | 0.534515 |
| 683.5 | 2 | 0 | 0 | 0.58043  | FALSE | 0 | NHLRC3   | 679494  | 0.525809 |
| 1147  | 2 | 0 | 0 | 0.632412 | FALSE | 0 | NIPSNAP1 | 1388934 | 0.534515 |
| 457.5 | 2 | 0 | 0 | 0.556221 | FALSE | 0 | NUP43    | 305368  | 0.504978 |
| 435.5 | 2 | 0 | 0 | 0.553088 | FALSE | 0 | OCLN     | 323590  | 0.509379 |
| 435.5 | 2 | 0 | 0 | 0.553088 | FALSE | 0 | ORC4     | 323590  | 0.509379 |
| 1147  | 2 | 0 | 0 | 0.632412 | FALSE | 0 | PARD3    | 1388934 | 0.534515 |
| 683.5 | 2 | 0 | 0 | 0.58043  | FALSE | 0 | PLAGL2   | 679494  | 0.525809 |
| 1147  | 2 | 0 | 0 | 0.632412 | FALSE | 0 | PRKACB   | 1388934 | 0.534515 |
| 383.5 | 2 | 0 | 0 | 0.546882 | FALSE | 0 | PRRX1    | 135252  | 0.508644 |
| 683.5 | 2 | 0 | 0 | 0.58043  | FALSE | 0 | RAB3IP   | 679494  | 0.525809 |
| 445.5 | 2 | 0 | 0 | 0.553948 | FALSE | 0 | RAB7A    | 245266  | 0.512687 |
| 1147  | 2 | 0 | 0 | 0.632412 | FALSE | 0 | REV1     | 1388934 | 0.534515 |
| 683.5 | 2 | 0 | 0 | 0.58043  | FALSE | 0 | RGS4     | 679494  | 0.525809 |
| 619   | 2 | 0 | 0 | 0.573671 | FALSE | 0 | ROCK1    | 571238  | 0.520202 |
| 1147  | 2 | 0 | 0 | 0.632412 | FALSE | 0 | RRAGC    | 1388934 | 0.534515 |
| 683.5 | 2 | 0 | 0 | 0.58043  | FALSE | 0 | RSBN1L   | 679494  | 0.525809 |
| 1147  | 2 | 0 | 0 | 0.632412 | FALSE | 0 | SERINC5  | 1388934 | 0.534515 |
| 435.5 | 2 | 0 | 0 | 0.553088 | FALSE | 0 | SET      | 323590  | 0.509379 |
| 1147  | 2 | 0 | 0 | 0.632412 | FALSE | 0 | SH3KBP1  | 1388934 | 0.534515 |
| 1147  | 2 | 0 | 0 | 0.632412 | FALSE | 0 | SLC27A1  | 1388934 | 0.534515 |
| 1147  | 2 | 0 | 0 | 0.632412 | FALSE | 0 | SLC30A7  | 1388934 | 0.534515 |
| 1147  | 2 | 0 | 0 | 0.632412 | FALSE | 0 | SMAD5    | 1388934 | 0.534515 |
| 567   | 2 | 0 | 0 | 0.567158 | FALSE | 0 | SNAI1    | 464870  | 0.523105 |
| 1147  | 2 | 0 | 0 | 0.632412 | FALSE | 0 | SNAI2    | 1388934 | 0.534515 |
| 1147  | 2 | 0 | 0 | 0.632412 | FALSE | 0 | SOCS7    | 1388934 | 0.534515 |
| 619   | 2 | 0 | 0 | 0.573671 | FALSE | 0 | SPP1     | 571238  | 0.520202 |
| 1147  | 2 | 0 | 0 | 0.632412 | FALSE | 0 | SRGAP1   | 1388934 | 0.534515 |
| 435.5 | 2 | 0 | 0 | 0.553088 | FALSE | 0 | TCF4     | 323590  | 0.509379 |

|       |   |   |   |          |       |   |          |         |          |
|-------|---|---|---|----------|-------|---|----------|---------|----------|
| 619   | 2 | 0 | 0 | 0.573671 | FALSE | 0 | TGFB1    | 571238  | 0.520202 |
| 346   | 2 | 0 | 0 | 0.542704 | FALSE | 0 | TGFB2    | 61302   | 0.504386 |
| 1147  | 2 | 0 | 0 | 0.632412 | FALSE | 0 | TGFBI    | 1388934 | 0.534515 |
| 683.5 | 2 | 0 | 0 | 0.58043  | FALSE | 0 | TIMP1    | 679494  | 0.525809 |
| 1147  | 2 | 0 | 0 | 0.632412 | FALSE | 0 | TMEFF1   | 1388934 | 0.534515 |
| 1147  | 2 | 0 | 0 | 0.632412 | FALSE | 0 | TMEM189- | 1388934 | 0.534515 |
| 1147  | 2 | 0 | 0 | 0.632412 | FALSE | 0 | TMEM9B   | 1388934 | 0.534515 |
| 1147  | 2 | 0 | 0 | 0.632412 | FALSE | 0 | TMOD3    | 1388934 | 0.534515 |
| 1147  | 2 | 0 | 0 | 0.632412 | FALSE | 0 | TRIM28   | 1388934 | 0.534515 |
| 683.5 | 2 | 0 | 0 | 0.58043  | FALSE | 0 | TSPAN6   | 679494  | 0.525809 |
| 383.5 | 2 | 0 | 0 | 0.546882 | FALSE | 0 | UBE2W    | 135252  | 0.508644 |
| 1147  | 2 | 0 | 0 | 0.632412 | FALSE | 0 | UBE4A    | 1388934 | 0.534515 |
| 1147  | 2 | 0 | 0 | 0.632412 | FALSE | 0 | ZBTB25   | 1388934 | 0.534515 |
| 1147  | 2 | 0 | 0 | 0.632412 | FALSE | 0 | ZDHHC6   | 1388934 | 0.534515 |
| 1147  | 2 | 0 | 0 | 0.632412 | FALSE | 0 | ZFYVE9   | 1388934 | 0.534515 |
| 567   | 2 | 0 | 0 | 0.567158 | FALSE | 0 | ZMYM4    | 464870  | 0.523105 |
| 1147  | 2 | 0 | 0 | 0.632412 | FALSE | 0 | ZNF180   | 1388934 | 0.534515 |
| 1147  | 2 | 0 | 0 | 0.632412 | FALSE | 0 | ZNF267   | 1388934 | 0.534515 |
| 1147  | 2 | 0 | 0 | 0.632412 | FALSE | 0 | ZRANB1   | 1388934 | 0.534515 |
| 588   | 2 | 0 | 0 | 0.545346 | FALSE | 0 | ACBD3    | 35630   | 0.807428 |
| 588   | 2 | 0 | 0 | 0.545346 | FALSE | 0 | ACO1     | 35630   | 0.807428 |
| 588   | 2 | 0 | 0 | 0.545346 | FALSE | 0 | ACTBL2   | 35630   | 0.807428 |
| 588   | 2 | 0 | 0 | 0.545346 | FALSE | 0 | ACTN1    | 35630   | 0.807428 |
| 588   | 2 | 0 | 0 | 0.545346 | FALSE | 0 | ANXA7    | 35630   | 0.807428 |
| 588   | 2 | 0 | 0 | 0.545346 | FALSE | 0 | AP1G2    | 35630   | 0.807428 |
| 588   | 2 | 0 | 0 | 0.545346 | FALSE | 0 | APMAP    | 35630   | 0.807428 |
| 588   | 2 | 0 | 0 | 0.545346 | FALSE | 0 | ARF3     | 35630   | 0.807428 |
| 588   | 2 | 0 | 0 | 0.545346 | FALSE | 0 | ARGLU1   | 35630   | 0.807428 |
| 588   | 2 | 0 | 0 | 0.545346 | FALSE | 0 | ATF6     | 35630   | 0.807428 |
| 588   | 2 | 0 | 0 | 0.545346 | FALSE | 0 | ATP11AUN | 35630   | 0.807428 |
| 541   | 2 | 0 | 0 | 0.564516 | FALSE | 0 | ATP6V1H  | 429786  | 0.519731 |
| 588   | 2 | 0 | 0 | 0.545346 | FALSE | 0 | BABAM1   | 35630   | 0.807428 |
| 588   | 2 | 0 | 0 | 0.545346 | FALSE | 0 | BAG6     | 35630   | 0.807428 |
| 588   | 2 | 0 | 0 | 0.545346 | FALSE | 0 | BAIAP2   | 35630   | 0.807428 |
| 588   | 2 | 0 | 0 | 0.545346 | FALSE | 0 | BCHE     | 35630   | 0.807428 |
| 588   | 2 | 0 | 0 | 0.545346 | FALSE | 0 | BCLAF1   | 35630   | 0.807428 |
| 588   | 2 | 0 | 0 | 0.545346 | FALSE | 0 | CARD10   | 35630   | 0.807428 |
| 588   | 2 | 0 | 0 | 0.545346 | FALSE | 0 | CARHSP1  | 35630   | 0.807428 |
| 588   | 2 | 0 | 0 | 0.545346 | FALSE | 0 | CASK     | 35630   | 0.807428 |
| 588   | 2 | 0 | 0 | 0.545346 | FALSE | 0 | CCDC83   | 35630   | 0.807428 |
| 1121  | 2 | 0 | 0 | 0.628971 | FALSE | 0 | CCNA2    | 1216088 | 0.536398 |
| 588   | 2 | 0 | 0 | 0.545346 | FALSE | 0 | CD300LB  | 35630   | 0.807428 |
| 588   | 2 | 0 | 0 | 0.545346 | FALSE | 0 | CDC25A   | 35630   | 0.807428 |
| 588   | 2 | 0 | 0 | 0.545346 | FALSE | 0 | CECR2    | 35630   | 0.807428 |
| 1121  | 2 | 0 | 0 | 0.628971 | FALSE | 0 | CFH      | 1216088 | 0.536398 |
| 588   | 2 | 0 | 0 | 0.545346 | FALSE | 0 | CNNM3    | 35630   | 0.807428 |
| 588   | 2 | 0 | 0 | 0.545346 | FALSE | 0 | CPNE1    | 35630   | 0.807428 |

|       |   |   |   |          |       |   |          |         |          |
|-------|---|---|---|----------|-------|---|----------|---------|----------|
| 588   | 2 | 0 | 0 | 0.545346 | FALSE | 0 | CYTIP    | 35630   | 0.807428 |
| 588   | 2 | 0 | 0 | 0.545346 | FALSE | 0 | DBF4B    | 35630   | 0.807428 |
| 588   | 2 | 0 | 0 | 0.545346 | FALSE | 0 | DCAF16   | 35630   | 0.807428 |
| 588   | 2 | 0 | 0 | 0.545346 | FALSE | 0 | DDX60    | 35630   | 0.807428 |
| 588   | 2 | 0 | 0 | 0.545346 | FALSE | 0 | DECR1    | 35630   | 0.807428 |
| 588   | 2 | 0 | 0 | 0.545346 | FALSE | 0 | DEDD     | 35630   | 0.807428 |
| 588   | 2 | 0 | 0 | 0.545346 | FALSE | 0 | DGCR6L   | 35630   | 0.807428 |
| 588   | 2 | 0 | 0 | 0.545346 | FALSE | 0 | DHRS1    | 35630   | 0.807428 |
| 588   | 2 | 0 | 0 | 0.545346 | FALSE | 0 | DHX8     | 35630   | 0.807428 |
| 588   | 2 | 0 | 0 | 0.545346 | FALSE | 0 | DNPH1    | 35630   | 0.807428 |
| 588   | 2 | 0 | 0 | 0.545346 | FALSE | 0 | EFNA5    | 35630   | 0.807428 |
| 588   | 2 | 0 | 0 | 0.545346 | FALSE | 0 | ELMSAN1  | 35630   | 0.807428 |
| 588   | 2 | 0 | 0 | 0.545346 | FALSE | 0 | EML1     | 35630   | 0.807428 |
| 588   | 2 | 0 | 0 | 0.545346 | FALSE | 0 | ENTPD5   | 35630   | 0.807428 |
| 588   | 2 | 0 | 0 | 0.545346 | FALSE | 0 | EPB41L4A | 35630   | 0.807428 |
| 588   | 2 | 0 | 0 | 0.545346 | FALSE | 0 | ESD      | 35630   | 0.807428 |
| 588   | 2 | 0 | 0 | 0.545346 | FALSE | 0 | ETAA1    | 35630   | 0.807428 |
| 588   | 2 | 0 | 0 | 0.545346 | FALSE | 0 | FAM111A  | 35630   | 0.807428 |
| 588   | 2 | 0 | 0 | 0.545346 | FALSE | 0 | FANCF    | 35630   | 0.807428 |
| 588   | 2 | 0 | 0 | 0.545346 | FALSE | 0 | FBXO3    | 35630   | 0.807428 |
| 588   | 2 | 0 | 0 | 0.545346 | FALSE | 0 | FNBP4    | 35630   | 0.807428 |
| 588   | 2 | 0 | 0 | 0.545346 | FALSE | 0 | GLTP     | 35630   | 0.807428 |
| 588   | 2 | 0 | 0 | 0.545346 | FALSE | 0 | GOPC     | 35630   | 0.807428 |
| 588   | 2 | 0 | 0 | 0.545346 | FALSE | 0 | GPANK1   | 35630   | 0.807428 |
| 588   | 2 | 0 | 0 | 0.545346 | FALSE | 0 | GPM6B    | 35630   | 0.807428 |
| 588   | 2 | 0 | 0 | 0.545346 | FALSE | 0 | GRAP2    | 35630   | 0.807428 |
| 588   | 2 | 0 | 0 | 0.545346 | FALSE | 0 | GRPEL1   | 35630   | 0.807428 |
| 588   | 2 | 0 | 0 | 0.545346 | FALSE | 0 | GTPBP3   | 35630   | 0.807428 |
| 588   | 2 | 0 | 0 | 0.545346 | FALSE | 0 | HAS2     | 35630   | 0.807428 |
| 588   | 2 | 0 | 0 | 0.545346 | FALSE | 0 | HIST1H4B | 35630   | 0.807428 |
| 588   | 2 | 0 | 0 | 0.545346 | FALSE | 0 | HLA-C    | 35630   | 0.807428 |
| 588   | 2 | 0 | 0 | 0.545346 | FALSE | 0 | HLA-DPA1 | 35630   | 0.807428 |
| 588   | 2 | 0 | 0 | 0.545346 | FALSE | 0 | HNRNPA3  | 35630   | 0.807428 |
| 588   | 2 | 0 | 0 | 0.545346 | FALSE | 0 | HORMAD2  | 35630   | 0.807428 |
| 588   | 2 | 0 | 0 | 0.545346 | FALSE | 0 | HOXB8    | 35630   | 0.807428 |
| 1121  | 2 | 0 | 0 | 0.628971 | FALSE | 0 | IER5L    | 1216088 | 0.536398 |
| 657.5 | 2 | 0 | 0 | 0.577665 | FALSE | 0 | IFIT1    | 622100  | 0.523943 |
| 657.5 | 2 | 0 | 0 | 0.577665 | FALSE | 0 | IFITM2   | 622100  | 0.523943 |
| 588   | 2 | 0 | 0 | 0.545346 | FALSE | 0 | IL1RL2   | 35630   | 0.807428 |
| 588   | 2 | 0 | 0 | 0.545346 | FALSE | 0 | IL6      | 35630   | 0.807428 |
| 588   | 2 | 0 | 0 | 0.545346 | FALSE | 0 | INTU     | 35630   | 0.807428 |
| 588   | 2 | 0 | 0 | 0.545346 | FALSE | 0 | IQCE     | 35630   | 0.807428 |
| 588   | 2 | 0 | 0 | 0.545346 | FALSE | 0 | IRAK1    | 35630   | 0.807428 |
| 588   | 2 | 0 | 0 | 0.545346 | FALSE | 0 | ITCH     | 35630   | 0.807428 |
| 357.5 | 2 | 0 | 0 | 0.543994 | FALSE | 0 | ITGBL1   | 124888  | 0.505674 |
| 588   | 2 | 0 | 0 | 0.545346 | FALSE | 0 | JADE2    | 35630   | 0.807428 |
| 588   | 2 | 0 | 0 | 0.545346 | FALSE | 0 | KCTD15   | 35630   | 0.807428 |



|       |   |   |   |          |       |            |         |          |
|-------|---|---|---|----------|-------|------------|---------|----------|
| 588   | 2 | 0 | 0 | 0.545346 | FALSE | 0 KIAA0040 | 35630   | 0.807428 |
| 588   | 2 | 0 | 0 | 0.545346 | FALSE | 0 KIAA1524 | 35630   | 0.807428 |
| 588   | 2 | 0 | 0 | 0.545346 | FALSE | 0 KLF9     | 35630   | 0.807428 |
| 588   | 2 | 0 | 0 | 0.545346 | FALSE | 0 KSR1     | 35630   | 0.807428 |
| 588   | 2 | 0 | 0 | 0.545346 | FALSE | 0 LFNG     | 35630   | 0.807428 |
| 588   | 2 | 0 | 0 | 0.545346 | FALSE | 0 LRRC8D   | 35630   | 0.807428 |
| 588   | 2 | 0 | 0 | 0.545346 | FALSE | 0 LTB4R2   | 35630   | 0.807428 |
| 1121  | 2 | 0 | 0 | 0.628971 | FALSE | 0 LY75     | 1216088 | 0.536398 |
| 588   | 2 | 0 | 0 | 0.545346 | FALSE | 0 MAN1C1   | 35630   | 0.807428 |
| 588   | 2 | 0 | 0 | 0.545346 | FALSE | 0 MBOAT1   | 35630   | 0.807428 |
| 588   | 2 | 0 | 0 | 0.545346 | FALSE | 0 MDN1     | 35630   | 0.807428 |
| 588   | 2 | 0 | 0 | 0.545346 | FALSE | 0 MEA1     | 35630   | 0.807428 |
| 588   | 2 | 0 | 0 | 0.545346 | FALSE | 0 METRNL   | 35630   | 0.807428 |
| 588   | 2 | 0 | 0 | 0.545346 | FALSE | 0 METTL7A  | 35630   | 0.807428 |
| 588   | 2 | 0 | 0 | 0.545346 | FALSE | 0 MKRN2    | 35630   | 0.807428 |
| 588   | 2 | 0 | 0 | 0.545346 | FALSE | 0 MPP2     | 35630   | 0.807428 |
| 588   | 2 | 0 | 0 | 0.545346 | FALSE | 0 MR1      | 35630   | 0.807428 |
| 588   | 2 | 0 | 0 | 0.545346 | FALSE | 0 MRPL10   | 35630   | 0.807428 |
| 588   | 2 | 0 | 0 | 0.545346 | FALSE | 0 MRPS30   | 35630   | 0.807428 |
| 541   | 2 | 0 | 0 | 0.564516 | FALSE | 0 MTA2     | 429786  | 0.519731 |
| 588   | 2 | 0 | 0 | 0.545346 | FALSE | 0 MYL12B   | 35630   | 0.807428 |
| 588   | 2 | 0 | 0 | 0.545346 | FALSE | 0 MYLK     | 35630   | 0.807428 |
| 588   | 2 | 0 | 0 | 0.545346 | FALSE | 0 NAPG     | 35630   | 0.807428 |
| 588   | 2 | 0 | 0 | 0.545346 | FALSE | 0 NFKB1    | 35630   | 0.807428 |
| 588   | 2 | 0 | 0 | 0.545346 | FALSE | 0 NLGN1    | 35630   | 0.807428 |
| 657.5 | 2 | 0 | 0 | 0.577665 | FALSE | 0 NOTCH2   | 622100  | 0.523943 |
| 588   | 2 | 0 | 0 | 0.545346 | FALSE | 0 NR6A1    | 35630   | 0.807428 |
| 588   | 2 | 0 | 0 | 0.545346 | FALSE | 0 OGFOD1   | 35630   | 0.807428 |
| 588   | 2 | 0 | 0 | 0.545346 | FALSE | 0 P2RX5    | 35630   | 0.807428 |
| 588   | 2 | 0 | 0 | 0.545346 | FALSE | 0 PACS2    | 35630   | 0.807428 |
| 588   | 2 | 0 | 0 | 0.545346 | FALSE | 0 PAFAH2   | 35630   | 0.807428 |
| 588   | 2 | 0 | 0 | 0.545346 | FALSE | 0 PCDHGB6  | 35630   | 0.807428 |
| 588   | 2 | 0 | 0 | 0.545346 | FALSE | 0 PCMTD2   | 35630   | 0.807428 |
| 1121  | 2 | 0 | 0 | 0.628971 | FALSE | 0 PELI1    | 1216088 | 0.536398 |
| 588   | 2 | 0 | 0 | 0.545346 | FALSE | 0 PHB2     | 35630   | 0.807428 |
| 588   | 2 | 0 | 0 | 0.545346 | FALSE | 0 PHF20L1  | 35630   | 0.807428 |
| 588   | 2 | 0 | 0 | 0.545346 | FALSE | 0 PHF23    | 35630   | 0.807428 |
| 588   | 2 | 0 | 0 | 0.545346 | FALSE | 0 PIGB     | 35630   | 0.807428 |
| 588   | 2 | 0 | 0 | 0.545346 | FALSE | 0 PLA1A    | 35630   | 0.807428 |
| 588   | 2 | 0 | 0 | 0.545346 | FALSE | 0 PLIN2    | 35630   | 0.807428 |
| 588   | 2 | 0 | 0 | 0.545346 | FALSE | 0 PMAIP1   | 35630   | 0.807428 |
| 588   | 2 | 0 | 0 | 0.545346 | FALSE | 0 PPHLN1   | 35630   | 0.807428 |
| 588   | 2 | 0 | 0 | 0.545346 | FALSE | 0 PPRC1    | 35630   | 0.807428 |
| 588   | 2 | 0 | 0 | 0.545346 | FALSE | 0 PPWD1    | 35630   | 0.807428 |
| 588   | 2 | 0 | 0 | 0.545346 | FALSE | 0 PRKDC    | 35630   | 0.807428 |
| 588   | 2 | 0 | 0 | 0.545346 | FALSE | 0 PRRC2A   | 35630   | 0.807428 |
| 588   | 2 | 0 | 0 | 0.545346 | FALSE | 0 PTMS     | 35630   | 0.807428 |

|       |   |   |   |          |       |             |         |          |
|-------|---|---|---|----------|-------|-------------|---------|----------|
| 588   | 2 | 0 | 0 | 0.545346 | FALSE | 0 RAB20     | 35630   | 0.807428 |
| 588   | 2 | 0 | 0 | 0.545346 | FALSE | 0 RAD54L2   | 35630   | 0.807428 |
| 588   | 2 | 0 | 0 | 0.545346 | FALSE | 0 RAD9A     | 35630   | 0.807428 |
| 588   | 2 | 0 | 0 | 0.545346 | FALSE | 0 RAPGEF5   | 35630   | 0.807428 |
| 588   | 2 | 0 | 0 | 0.545346 | FALSE | 0 RARB      | 35630   | 0.807428 |
| 588   | 2 | 0 | 0 | 0.545346 | FALSE | 0 RBL1      | 35630   | 0.807428 |
| 588   | 2 | 0 | 0 | 0.545346 | FALSE | 0 RFX5      | 35630   | 0.807428 |
| 588   | 2 | 0 | 0 | 0.545346 | FALSE | 0 RHOBTB3   | 35630   | 0.807428 |
| 588   | 2 | 0 | 0 | 0.545346 | FALSE | 0 RNASET2   | 35630   | 0.807428 |
| 588   | 2 | 0 | 0 | 0.545346 | FALSE | 0 RP11-111M | 35630   | 0.807428 |
| 588   | 2 | 0 | 0 | 0.545346 | FALSE | 0 RPL11     | 35630   | 0.807428 |
| 588   | 2 | 0 | 0 | 0.545346 | FALSE | 0 RPS6      | 35630   | 0.807428 |
| 588   | 2 | 0 | 0 | 0.545346 | FALSE | 0 RUFY2     | 35630   | 0.807428 |
| 588   | 2 | 0 | 0 | 0.545346 | FALSE | 0 S100A12   | 35630   | 0.807428 |
| 588   | 2 | 0 | 0 | 0.545346 | FALSE | 0 SCAF8     | 35630   | 0.807428 |
| 588   | 2 | 0 | 0 | 0.545346 | FALSE | 0 SCARF2    | 35630   | 0.807428 |
| 588   | 2 | 0 | 0 | 0.545346 | FALSE | 0 SERPINA4  | 35630   | 0.807428 |
| 588   | 2 | 0 | 0 | 0.545346 | FALSE | 0 SESTD1    | 35630   | 0.807428 |
| 588   | 2 | 0 | 0 | 0.545346 | FALSE | 0 SFRP1     | 35630   | 0.807428 |
| 588   | 2 | 0 | 0 | 0.545346 | FALSE | 0 SKA2      | 35630   | 0.807428 |
| 588   | 2 | 0 | 0 | 0.545346 | FALSE | 0 SLC10A3   | 35630   | 0.807428 |
| 588   | 2 | 0 | 0 | 0.545346 | FALSE | 0 SLC16A3   | 35630   | 0.807428 |
| 588   | 2 | 0 | 0 | 0.545346 | FALSE | 0 SLC17A5   | 35630   | 0.807428 |
| 588   | 2 | 0 | 0 | 0.545346 | FALSE | 0 SLC22A15  | 35630   | 0.807428 |
| 588   | 2 | 0 | 0 | 0.545346 | FALSE | 0 SLC2A12   | 35630   | 0.807428 |
| 588   | 2 | 0 | 0 | 0.545346 | FALSE | 0 SLC2A3    | 35630   | 0.807428 |
| 588   | 2 | 0 | 0 | 0.545346 | FALSE | 0 SLC4A1AP  | 35630   | 0.807428 |
| 588   | 2 | 0 | 0 | 0.545346 | FALSE | 0 SLC50A1   | 35630   | 0.807428 |
| 588   | 2 | 0 | 0 | 0.545346 | FALSE | 0 SLK       | 35630   | 0.807428 |
| 588   | 2 | 0 | 0 | 0.545346 | FALSE | 0 SMARCD1   | 35630   | 0.807428 |
| 1121  | 2 | 0 | 0 | 0.628971 | FALSE | 0 SOS1      | 1216088 | 0.536398 |
| 431.5 | 2 | 0 | 0 | 0.552657 | FALSE | 0 SPATS2L   | 270480  | 0.508865 |
| 588   | 2 | 0 | 0 | 0.545346 | FALSE | 0 SREK1     | 35630   | 0.807428 |
| 588   | 2 | 0 | 0 | 0.545346 | FALSE | 0 SRPK1     | 35630   | 0.807428 |
| 588   | 2 | 0 | 0 | 0.545346 | FALSE | 0 SRPRB     | 35630   | 0.807428 |
| 588   | 2 | 0 | 0 | 0.545346 | FALSE | 0 ST6GAL2   | 35630   | 0.807428 |
| 588   | 2 | 0 | 0 | 0.545346 | FALSE | 0 STIM1     | 35630   | 0.807428 |
| 588   | 2 | 0 | 0 | 0.545346 | FALSE | 0 STK40     | 35630   | 0.807428 |
| 588   | 2 | 0 | 0 | 0.545346 | FALSE | 0 STMN3     | 35630   | 0.807428 |
| 588   | 2 | 0 | 0 | 0.545346 | FALSE | 0 STXBP2    | 35630   | 0.807428 |
| 588   | 2 | 0 | 0 | 0.545346 | FALSE | 0 SUPT16H   | 35630   | 0.807428 |
| 588   | 2 | 0 | 0 | 0.545346 | FALSE | 0 SYNJ1     | 35630   | 0.807428 |
| 588   | 2 | 0 | 0 | 0.545346 | FALSE | 0 THAP5     | 35630   | 0.807428 |
| 588   | 2 | 0 | 0 | 0.545346 | FALSE | 0 TLL1      | 35630   | 0.807428 |
| 588   | 2 | 0 | 0 | 0.545346 | FALSE | 0 TLR4      | 35630   | 0.807428 |
| 588   | 2 | 0 | 0 | 0.545346 | FALSE | 0 TMEM136   | 35630   | 0.807428 |
| 588   | 2 | 0 | 0 | 0.545346 | FALSE | 0 TMEM41B   | 35630   | 0.807428 |

|         |     |   |   |          |       |   |            |          |          |
|---------|-----|---|---|----------|-------|---|------------|----------|----------|
| 588     | 2   | 0 | 0 | 0.545346 | FALSE | 0 | TMPPE      | 35630    | 0.807428 |
| 588     | 2   | 0 | 0 | 0.545346 | FALSE | 0 | TMPRSS5    | 35630    | 0.807428 |
| 1121    | 2   | 0 | 0 | 0.628971 | FALSE | 0 | TNF-??     | 1216088  | 0.536398 |
| 588     | 2   | 0 | 0 | 0.545346 | FALSE | 0 | TNFAIP8    | 35630    | 0.807428 |
| 588     | 2   | 0 | 0 | 0.545346 | FALSE | 0 | TNIK       | 35630    | 0.807428 |
| 588     | 2   | 0 | 0 | 0.545346 | FALSE | 0 | TOMM70A    | 35630    | 0.807428 |
| 657.5   | 2   | 0 | 0 | 0.577665 | FALSE | 0 | TRAM1      | 622100   | 0.523943 |
| 588     | 2   | 0 | 0 | 0.545346 | FALSE | 0 | TRMT112    | 35630    | 0.807428 |
| 431.5   | 2   | 0 | 0 | 0.552657 | FALSE | 0 | TSPAN14    | 270480   | 0.508865 |
| 588     | 2   | 0 | 0 | 0.545346 | FALSE | 0 | UHRF1      | 35630    | 0.807428 |
| 588     | 2   | 0 | 0 | 0.545346 | FALSE | 0 | UMPS       | 35630    | 0.807428 |
| 588     | 2   | 0 | 0 | 0.545346 | FALSE | 0 | USP48      | 35630    | 0.807428 |
| 588     | 2   | 0 | 0 | 0.545346 | FALSE | 0 | WSB2       | 35630    | 0.807428 |
| 588     | 2   | 0 | 0 | 0.545346 | FALSE | 0 | YTHDF2     | 35630    | 0.807428 |
| 1121    | 2   | 0 | 0 | 0.628971 | FALSE | 0 | ZDHHC12    | 1216088  | 0.536398 |
| 588     | 2   | 0 | 0 | 0.545346 | FALSE | 0 | ZHX1       | 35630    | 0.807428 |
| 588     | 2   | 0 | 0 | 0.545346 | FALSE | 0 | ZNF175     | 35630    | 0.807428 |
| 588     | 2   | 0 | 0 | 0.545346 | FALSE | 0 | ZNF257     | 35630    | 0.807428 |
| 588     | 2   | 0 | 0 | 0.545346 | FALSE | 0 | ZNF26      | 35630    | 0.807428 |
| 588     | 2   | 0 | 0 | 0.545346 | FALSE | 0 | ZNF410     | 35630    | 0.807428 |
| 588     | 2   | 0 | 0 | 0.545346 | FALSE | 0 | ZNF493     | 35630    | 0.807428 |
| 588     | 2   | 0 | 0 | 0.545346 | FALSE | 0 | ZNF597     | 35630    | 0.807428 |
| 588     | 2   | 0 | 0 | 0.545346 | FALSE | 0 | ZNF620     | 35630    | 0.807428 |
| 588     | 2   | 0 | 0 | 0.545346 | FALSE | 0 | ZNF629     | 35630    | 0.807428 |
| 588     | 2   | 0 | 0 | 0.545346 | FALSE | 0 | ZNF768     | 35630    | 0.807428 |
| 2.15103 | 874 | 0 | 0 | 0.720891 | TRUE  | 0 | hsa-miR-14 | 1.03E+09 | 0.067708 |
| 588     | 2   | 0 | 0 | 0.545346 | FALSE | 0 | ZNF823     | 35630    | 0.807428 |
| 1116    | 2   | 0 | 0 | 0.627558 | FALSE | 0 | AFF1       | 1139158  | 0.539952 |
| 536     | 2   | 0 | 0 | 0.563717 | FALSE | 0 | ATP1A1     | 412704   | 0.521443 |
| 340     | 2   | 0 | 0 | 0.541782 | FALSE | 0 | BCAT2      | 234692   | 0.506726 |
| 652.5   | 2   | 0 | 0 | 0.576621 | FALSE | 0 | DDX26B     | 593452   | 0.527104 |
| 1116    | 2   | 0 | 0 | 0.627558 | FALSE | 0 | FAM160A1   | 1139158  | 0.539952 |
| 1116    | 2   | 0 | 0 | 0.627558 | FALSE | 0 | GINS1      | 1139158  | 0.539952 |
| 536     | 2   | 0 | 0 | 0.563717 | FALSE | 0 | HSPA1B     | 412704   | 0.521443 |
| 1116    | 2   | 0 | 0 | 0.627558 | FALSE | 0 | ITSN2      | 1139158  | 0.539952 |
| 1116    | 2   | 0 | 0 | 0.627558 | FALSE | 0 | KIAA2018   | 1139158  | 0.539952 |
| 1116    | 2   | 0 | 0 | 0.627558 | FALSE | 0 | KIT        | 1139158  | 0.539952 |
| 652.5   | 2   | 0 | 0 | 0.576621 | FALSE | 0 | LYPLA1     | 593452   | 0.527104 |
| 1116    | 2   | 0 | 0 | 0.627558 | FALSE | 0 | PBX1       | 1139158  | 0.539952 |
| 652.5   | 2   | 0 | 0 | 0.576621 | FALSE | 0 | PDK4       | 593452   | 0.527104 |
| 652.5   | 2   | 0 | 0 | 0.576621 | FALSE | 0 | PEAK1      | 593452   | 0.527104 |
| 1116    | 2   | 0 | 0 | 0.627558 | FALSE | 0 | PHTF2      | 1139158  | 0.539952 |
| 1116    | 2   | 0 | 0 | 0.627558 | FALSE | 0 | SOGA1      | 1139158  | 0.539952 |
| 1116    | 2   | 0 | 0 | 0.627558 | FALSE | 0 | SORT1      | 1139158  | 0.539952 |
| 652.5   | 2   | 0 | 0 | 0.576621 | FALSE | 0 | SSR3       | 593452   | 0.527104 |
| 1116    | 2   | 0 | 0 | 0.627558 | FALSE | 0 | ZNRF3      | 1139158  | 0.539952 |
| 848     | 2   | 0 | 0 | 0.603963 | FALSE | 0 | ACACA      | 126592   | 0.503867 |

|        |   |   |   |          |       |            |         |          |
|--------|---|---|---|----------|-------|------------|---------|----------|
| 1185.5 | 2 | 0 | 0 | 0.63616  | FALSE | 0 AHDC1    | 1546496 | 0.537188 |
| 1185.5 | 2 | 0 | 0 | 0.63616  | FALSE | 0 ARHGAP11 | 1546496 | 0.537188 |
| 1069   | 2 | 0 | 0 | 0.62467  | FALSE | 0 ARHGAP22 | 1047346 | 0.529237 |
| 1185.5 | 2 | 0 | 0 | 0.63616  | FALSE | 0 ARL6IP1  | 1546496 | 0.537188 |
| 1185.5 | 2 | 0 | 0 | 0.63616  | FALSE | 0 ARMC8    | 1546496 | 0.537188 |
| 1185.5 | 2 | 0 | 0 | 0.63616  | FALSE | 0 ARPC2    | 1546496 | 0.537188 |
| 846.5  | 2 | 0 | 0 | 0.604332 | FALSE | 0 ASB6     | 246542  | 0.501186 |
| 1185.5 | 2 | 0 | 0 | 0.63616  | FALSE | 0 ASCL2    | 1546496 | 0.537188 |
| 1069   | 2 | 0 | 0 | 0.62467  | FALSE | 0 ASNA1    | 1047346 | 0.529237 |
| 873    | 2 | 0 | 0 | 0.606544 | FALSE | 0 ATG14    | 596028  | 0.506094 |
| 1185.5 | 2 | 0 | 0 | 0.63616  | FALSE | 0 ATL3     | 1546496 | 0.537188 |
| 1185.5 | 2 | 0 | 0 | 0.63616  | FALSE | 0 ATP2A2   | 1546496 | 0.537188 |
| 1185.5 | 2 | 0 | 0 | 0.63616  | FALSE | 0 BLCAP    | 1546496 | 0.537188 |
| 1185.5 | 2 | 0 | 0 | 0.63616  | FALSE | 0 C19orf48 | 1546496 | 0.537188 |
| 1069   | 2 | 0 | 0 | 0.62467  | FALSE | 0 C22orf29 | 1047346 | 0.529237 |
| 1185.5 | 2 | 0 | 0 | 0.63616  | FALSE | 0 C7orf60  | 1546496 | 0.537188 |
| 937.5  | 2 | 0 | 0 | 0.612811 | FALSE | 0 CAPZA1   | 672392  | 0.513151 |
| 1185.5 | 2 | 0 | 0 | 0.63616  | FALSE | 0 CBX7     | 1546496 | 0.537188 |
| 1069   | 2 | 0 | 0 | 0.62467  | FALSE | 0 CCDC137  | 1047346 | 0.529237 |
| 1069   | 2 | 0 | 0 | 0.62467  | FALSE | 0 CCNE2    | 1047346 | 0.529237 |
| 937.5  | 2 | 0 | 0 | 0.612811 | FALSE | 0 CHAC1    | 672392  | 0.513151 |
| 947.5  | 2 | 0 | 0 | 0.613671 | FALSE | 0 CHD9     | 559732  | 0.514682 |
| 873    | 2 | 0 | 0 | 0.606544 | FALSE | 0 CLIP4    | 596028  | 0.506094 |
| 1069   | 2 | 0 | 0 | 0.62467  | FALSE | 0 CLN6     | 1047346 | 0.529237 |
| 868.5  | 2 | 0 | 0 | 0.605991 | FALSE | 0 CRIM1    | 258162  | 0.506126 |
| 947.5  | 2 | 0 | 0 | 0.613671 | FALSE | 0 CSNK1G1  | 559732  | 0.514682 |
| 868.5  | 2 | 0 | 0 | 0.605991 | FALSE | 0 CSNK2A1  | 258162  | 0.506126 |
| 1185.5 | 2 | 0 | 0 | 0.63616  | FALSE | 0 CYR61    | 1546496 | 0.537188 |
| 1185.5 | 2 | 0 | 0 | 0.63616  | FALSE | 0 DDX39B   | 1546496 | 0.537188 |
| 1069   | 2 | 0 | 0 | 0.62467  | FALSE | 0 DIXDC1   | 1047346 | 0.529237 |
| 1185.5 | 2 | 0 | 0 | 0.63616  | FALSE | 0 DNAJB14  | 1546496 | 0.537188 |
| 1185.5 | 2 | 0 | 0 | 0.63616  | FALSE | 0 DNMT1    | 1546496 | 0.537188 |
| 1069   | 2 | 0 | 0 | 0.62467  | FALSE | 0 DTL      | 1047346 | 0.529237 |
| 1185.5 | 2 | 0 | 0 | 0.63616  | FALSE | 0 DYRK1A   | 1546496 | 0.537188 |
| 1185.5 | 2 | 0 | 0 | 0.63616  | FALSE | 0 EAF1     | 1546496 | 0.537188 |
| 873    | 2 | 0 | 0 | 0.606544 | FALSE | 0 EIF2A    | 596028  | 0.506094 |
| 947.5  | 2 | 0 | 0 | 0.613671 | FALSE | 0 ELMOD2   | 559732  | 0.514682 |
| 1185.5 | 2 | 0 | 0 | 0.63616  | FALSE | 0 EMC10    | 1546496 | 0.537188 |
| 1185.5 | 2 | 0 | 0 | 0.63616  | FALSE | 0 ENTPD4   | 1546496 | 0.537188 |
| 868.5  | 2 | 0 | 0 | 0.605991 | FALSE | 0 ESRP1    | 258162  | 0.506126 |
| 947.5  | 2 | 0 | 0 | 0.613671 | FALSE | 0 ESYT1    | 559732  | 0.514682 |
| 1069   | 2 | 0 | 0 | 0.62467  | FALSE | 0 EVI5L    | 1047346 | 0.529237 |
| 959.5  | 2 | 0 | 0 | 0.616252 | FALSE | 0 FBXW2    | 714456  | 0.509569 |
| 1185.5 | 2 | 0 | 0 | 0.63616  | FALSE | 0 FEM1B    | 1546496 | 0.537188 |
| 1069   | 2 | 0 | 0 | 0.62467  | FALSE | 0 FGFRL1   | 1047346 | 0.529237 |
| 947.5  | 2 | 0 | 0 | 0.613671 | FALSE | 0 FLCN     | 559732  | 0.514682 |
| 1185.5 | 2 | 0 | 0 | 0.63616  | FALSE | 0 FOXO3    | 1546496 | 0.537188 |

|        |   |   |   |          |       |   |         |         |          |
|--------|---|---|---|----------|-------|---|---------|---------|----------|
| 1185.5 | 2 | 0 | 0 | 0.63616  | FALSE | 0 | FOXP1   | 1546496 | 0.537188 |
| 1185.5 | 2 | 0 | 0 | 0.63616  | FALSE | 0 | FOXP2   | 1546496 | 0.537188 |
| 1185.5 | 2 | 0 | 0 | 0.63616  | FALSE | 0 | GPR137B | 1546496 | 0.537188 |
| 873    | 2 | 0 | 0 | 0.606544 | FALSE | 0 | GRB10   | 596028  | 0.506094 |
| 1185.5 | 2 | 0 | 0 | 0.63616  | FALSE | 0 | GSKIP   | 1546496 | 0.537188 |
| 1069   | 2 | 0 | 0 | 0.62467  | FALSE | 0 | HCFC1   | 1047346 | 0.529237 |
| 937.5  | 2 | 0 | 0 | 0.612811 | FALSE | 0 | HS2ST1  | 672392  | 0.513151 |
| 937.5  | 2 | 0 | 0 | 0.612811 | FALSE | 0 | IDH1    | 672392  | 0.513151 |
| 947.5  | 2 | 0 | 0 | 0.613671 | FALSE | 0 | IKZF1   | 559732  | 0.514682 |
| 1185.5 | 2 | 0 | 0 | 0.63616  | FALSE | 0 | IL10    | 1546496 | 0.537188 |
| 1185.5 | 2 | 0 | 0 | 0.63616  | FALSE | 0 | IPO8    | 1546496 | 0.537188 |
| 885.5  | 2 | 0 | 0 | 0.607957 | FALSE | 0 | IPPK    | 312790  | 0.506586 |
| 1069   | 2 | 0 | 0 | 0.62467  | FALSE | 0 | ITPR1   | 1047346 | 0.529237 |
| 1069   | 2 | 0 | 0 | 0.62467  | FALSE | 0 | KIF2A   | 1047346 | 0.529237 |
| 873    | 2 | 0 | 0 | 0.606544 | FALSE | 0 | KIFAP3  | 596028  | 0.506094 |
| 959.5  | 2 | 0 | 0 | 0.616252 | FALSE | 0 | KLF13   | 714456  | 0.509569 |
| 885.5  | 2 | 0 | 0 | 0.607957 | FALSE | 0 | LRIG3   | 312790  | 0.506586 |
| 1069   | 2 | 0 | 0 | 0.62467  | FALSE | 0 | LZTFL1  | 1047346 | 0.529237 |
| 1069   | 2 | 0 | 0 | 0.62467  | FALSE | 0 | MAP4    | 1047346 | 0.529237 |
| 1069   | 2 | 0 | 0 | 0.62467  | FALSE | 0 | MAZ     | 1047346 | 0.529237 |
| 1185.5 | 2 | 0 | 0 | 0.63616  | FALSE | 0 | MBOAT7  | 1546496 | 0.537188 |
| 937.5  | 2 | 0 | 0 | 0.612811 | FALSE | 0 | MECP2   | 672392  | 0.513151 |
| 1185.5 | 2 | 0 | 0 | 0.63616  | FALSE | 0 | MGEA5   | 1546496 | 0.537188 |
| 959.5  | 2 | 0 | 0 | 0.616252 | FALSE | 0 | MOCS3   | 714456  | 0.509569 |
| 959.5  | 2 | 0 | 0 | 0.616252 | FALSE | 0 | MTPAP   | 714456  | 0.509569 |
| 885.5  | 2 | 0 | 0 | 0.607957 | FALSE | 0 | MYLIP   | 312790  | 0.506586 |
| 937.5  | 2 | 0 | 0 | 0.612811 | FALSE | 0 | NCOA1   | 672392  | 0.513151 |
| 959.5  | 2 | 0 | 0 | 0.616252 | FALSE | 0 | NCOR2   | 714456  | 0.509569 |
| 947.5  | 2 | 0 | 0 | 0.613671 | FALSE | 0 | NIPA1   | 559732  | 0.514682 |
| 885.5  | 2 | 0 | 0 | 0.607957 | FALSE | 0 | NRBF2   | 312790  | 0.506586 |
| 1069   | 2 | 0 | 0 | 0.62467  | FALSE | 0 | NUP188  | 1047346 | 0.529237 |
| 1185.5 | 2 | 0 | 0 | 0.63616  | FALSE | 0 | NUP50   | 1546496 | 0.537188 |
| 959.5  | 2 | 0 | 0 | 0.616252 | FALSE | 0 | PDE7A   | 714456  | 0.509569 |
| 937.5  | 2 | 0 | 0 | 0.612811 | FALSE | 0 | PGM2L1  | 672392  | 0.513151 |
| 1185.5 | 2 | 0 | 0 | 0.63616  | FALSE | 0 | POLG    | 1546496 | 0.537188 |
| 873    | 2 | 0 | 0 | 0.606544 | FALSE | 0 | POLI    | 596028  | 0.506094 |
| 885.5  | 2 | 0 | 0 | 0.607957 | FALSE | 0 | POLR2B  | 312790  | 0.506586 |
| 1185.5 | 2 | 0 | 0 | 0.63616  | FALSE | 0 | PPP2CA  | 1546496 | 0.537188 |
| 873    | 2 | 0 | 0 | 0.606544 | FALSE | 0 | PRKX    | 596028  | 0.506094 |
| 937.5  | 2 | 0 | 0 | 0.612811 | FALSE | 0 | PTCD2   | 672392  | 0.513151 |
| 1185.5 | 2 | 0 | 0 | 0.63616  | FALSE | 0 | QTRTD1  | 1546496 | 0.537188 |
| 1069   | 2 | 0 | 0 | 0.62467  | FALSE | 0 | RAB34   | 1047346 | 0.529237 |
| 868.5  | 2 | 0 | 0 | 0.605991 | FALSE | 0 | RAP1A   | 258162  | 0.506126 |
| 959.5  | 2 | 0 | 0 | 0.616252 | FALSE | 0 | RBBP8   | 714456  | 0.509569 |
| 1069   | 2 | 0 | 0 | 0.62467  | FALSE | 0 | RBCK1   | 1047346 | 0.529237 |
| 1069   | 2 | 0 | 0 | 0.62467  | FALSE | 0 | RBM14   | 1047346 | 0.529237 |
| 937.5  | 2 | 0 | 0 | 0.612811 | FALSE | 0 | RBM38   | 672392  | 0.513151 |

|        |   |   |   |          |       |            |         |          |
|--------|---|---|---|----------|-------|------------|---------|----------|
| 1185.5 | 2 | 0 | 0 | 0.63616  | FALSE | 0 RNF38    | 1546496 | 0.537188 |
| 868.5  | 2 | 0 | 0 | 0.605991 | FALSE | 0 RNMT     | 258162  | 0.506126 |
| 873    | 2 | 0 | 0 | 0.606544 | FALSE | 0 RORB     | 596028  | 0.506094 |
| 1069   | 2 | 0 | 0 | 0.62467  | FALSE | 0 RRAGD    | 1047346 | 0.529237 |
| 1185.5 | 2 | 0 | 0 | 0.63616  | FALSE | 0 RSPRY1   | 1546496 | 0.537188 |
| 1069   | 2 | 0 | 0 | 0.62467  | FALSE | 0 RUNX2    | 1047346 | 0.529237 |
| 1185.5 | 2 | 0 | 0 | 0.63616  | FALSE | 0 RYBP     | 1546496 | 0.537188 |
| 1069   | 2 | 0 | 0 | 0.62467  | FALSE | 0 SAR1A    | 1047346 | 0.529237 |
| 885.5  | 2 | 0 | 0 | 0.607957 | FALSE | 0 SCML1    | 312790  | 0.506586 |
| 1185.5 | 2 | 0 | 0 | 0.63616  | FALSE | 0 SEC24C   | 1546496 | 0.537188 |
| 1069   | 2 | 0 | 0 | 0.62467  | FALSE | 0 SLC2A13  | 1047346 | 0.529237 |
| 937.5  | 2 | 0 | 0 | 0.612811 | FALSE | 0 SMYD2    | 672392  | 0.513151 |
| 1069   | 2 | 0 | 0 | 0.62467  | FALSE | 0 SNX17    | 1047346 | 0.529237 |
| 1185.5 | 2 | 0 | 0 | 0.63616  | FALSE | 0 SPHK2    | 1546496 | 0.537188 |
| 937.5  | 2 | 0 | 0 | 0.612811 | FALSE | 0 SPOPL    | 672392  | 0.513151 |
| 937.5  | 2 | 0 | 0 | 0.612811 | FALSE | 0 SPRYD3   | 672392  | 0.513151 |
| 1069   | 2 | 0 | 0 | 0.62467  | FALSE | 0 SPTSSA   | 1047346 | 0.529237 |
| 1185.5 | 2 | 0 | 0 | 0.63616  | FALSE | 0 SSR1     | 1546496 | 0.537188 |
| 1069   | 2 | 0 | 0 | 0.62467  | FALSE | 0 STEAP3   | 1047346 | 0.529237 |
| 1185.5 | 2 | 0 | 0 | 0.63616  | FALSE | 0 STK35    | 1546496 | 0.537188 |
| 1185.5 | 2 | 0 | 0 | 0.63616  | FALSE | 0 SV2A     | 1546496 | 0.537188 |
| 1185.5 | 2 | 0 | 0 | 0.63616  | FALSE | 0 TBRG1    | 1546496 | 0.537188 |
| 1185.5 | 2 | 0 | 0 | 0.63616  | FALSE | 0 TIA1     | 1546496 | 0.537188 |
| 1069   | 2 | 0 | 0 | 0.62467  | FALSE | 0 TMEM127  | 1047346 | 0.529237 |
| 937.5  | 2 | 0 | 0 | 0.612811 | FALSE | 0 TP53     | 672392  | 0.513151 |
| 1185.5 | 2 | 0 | 0 | 0.63616  | FALSE | 0 TRIM2    | 1546496 | 0.537188 |
| 1069   | 2 | 0 | 0 | 0.62467  | FALSE | 0 UBA52    | 1047346 | 0.529237 |
| 1069   | 2 | 0 | 0 | 0.62467  | FALSE | 0 UBE2Q1   | 1047346 | 0.529237 |
| 873    | 2 | 0 | 0 | 0.606544 | FALSE | 0 UBFD1    | 596028  | 0.506094 |
| 1185.5 | 2 | 0 | 0 | 0.63616  | FALSE | 0 UBL3     | 1546496 | 0.537188 |
| 947.5  | 2 | 0 | 0 | 0.613671 | FALSE | 0 UBQLN2   | 559732  | 0.514682 |
| 1069   | 2 | 0 | 0 | 0.62467  | FALSE | 0 USP8     | 1047346 | 0.529237 |
| 1185.5 | 2 | 0 | 0 | 0.63616  | FALSE | 0 VMA21    | 1546496 | 0.537188 |
| 959.5  | 2 | 0 | 0 | 0.616252 | FALSE | 0 VPS35    | 714456  | 0.509569 |
| 1185.5 | 2 | 0 | 0 | 0.63616  | FALSE | 0 WBP2     | 1546496 | 0.537188 |
| 1185.5 | 2 | 0 | 0 | 0.63616  | FALSE | 0 WDR43    | 1546496 | 0.537188 |
| 1069   | 2 | 0 | 0 | 0.62467  | FALSE | 0 ZBTB10   | 1047346 | 0.529237 |
| 1185.5 | 2 | 0 | 0 | 0.63616  | FALSE | 0 ZFYVE26  | 1546496 | 0.537188 |
| 959.5  | 2 | 0 | 0 | 0.616252 | FALSE | 0 ZNF584   | 714456  | 0.509569 |
| 157    | 2 | 0 | 0 | 0.517573 | FALSE | 0 1-Mar    | 33284   | 0.506494 |
| 288.5  | 2 | 0 | 0 | 0.535453 | FALSE | 0 CNN3     | 83906   | 0.507951 |
| 105    | 2 | 0 | 0 | 0.513333 | FALSE | 0 FPR1     | 23504   | 0.504854 |
| 288.5  | 2 | 0 | 0 | 0.535453 | FALSE | 0 GAS7     | 83906   | 0.507951 |
| 288.5  | 2 | 0 | 0 | 0.535453 | FALSE | 0 LNPK     | 83906   | 0.507951 |
| 288.5  | 2 | 0 | 0 | 0.535453 | FALSE | 0 TBCK     | 83906   | 0.507951 |
| 379.5  | 2 | 0 | 0 | 0.546513 | FALSE | 0 ANKS1A   | 227114  | 0.507373 |
| 266.5  | 2 | 0 | 0 | 0.532995 | FALSE | 0 ARHGDI1A | 71124   | 0.504753 |

|       |   |   |   |          |       |   |           |        |          |
|-------|---|---|---|----------|-------|---|-----------|--------|----------|
| 293   | 2 | 0 | 0 | 0.53619  | FALSE | 0 | AUTS2     | 206534 | 0.50519  |
| 605.5 | 2 | 0 | 0 | 0.570599 | FALSE | 0 | C1orf109  | 488528 | 0.531195 |
| 268   | 2 | 0 | 0 | 0.533118 | FALSE | 0 | C3orf58   | 44434  | 0.505682 |
| 605.5 | 2 | 0 | 0 | 0.570599 | FALSE | 0 | CDK16     | 488528 | 0.531195 |
| 605.5 | 2 | 0 | 0 | 0.570599 | FALSE | 0 | CHAF1A    | 488528 | 0.531195 |
| 305.5 | 2 | 0 | 0 | 0.537727 | FALSE | 0 | CHD4      | 114370 | 0.504975 |
| 367.5 | 2 | 0 | 0 | 0.544916 | FALSE | 0 | CHFR      | 191994 | 0.509028 |
| 357.5 | 2 | 0 | 0 | 0.543564 | FALSE | 0 | CMTM4     | 220636 | 0.510745 |
| 293   | 2 | 0 | 0 | 0.53619  | FALSE | 0 | CTIF      | 206534 | 0.50519  |
| 367.5 | 2 | 0 | 0 | 0.544916 | FALSE | 0 | FOXN3     | 191994 | 0.509028 |
| 605.5 | 2 | 0 | 0 | 0.570599 | FALSE | 0 | FZD3      | 488528 | 0.531195 |
| 379.5 | 2 | 0 | 0 | 0.546513 | FALSE | 0 | GNB1L     | 227114 | 0.507373 |
| 357.5 | 2 | 0 | 0 | 0.543564 | FALSE | 0 | GPR137C   | 220636 | 0.510745 |
| 605.5 | 2 | 0 | 0 | 0.570599 | FALSE | 0 | H6PD      | 488528 | 0.531195 |
| 605.5 | 2 | 0 | 0 | 0.570599 | FALSE | 0 | ILF3      | 488528 | 0.531195 |
| 605.5 | 2 | 0 | 0 | 0.570599 | FALSE | 0 | KIAA0195  | 488528 | 0.531195 |
| 605.5 | 2 | 0 | 0 | 0.570599 | FALSE | 0 | LENG8     | 488528 | 0.531195 |
| 379.5 | 2 | 0 | 0 | 0.546513 | FALSE | 0 | LRRC47    | 227114 | 0.507373 |
| 605.5 | 2 | 0 | 0 | 0.570599 | FALSE | 0 | LTBP3     | 488528 | 0.531195 |
| 605.5 | 2 | 0 | 0 | 0.570599 | FALSE | 0 | LZTS2     | 488528 | 0.531195 |
| 379.5 | 2 | 0 | 0 | 0.546513 | FALSE | 0 | MAST3     | 227114 | 0.507373 |
| 266.5 | 2 | 0 | 0 | 0.532995 | FALSE | 0 | MED28     | 71124  | 0.504753 |
| 605.5 | 2 | 0 | 0 | 0.570599 | FALSE | 0 | NPDC1     | 488528 | 0.531195 |
| 605.5 | 2 | 0 | 0 | 0.570599 | FALSE | 0 | NUDT16L1  | 488528 | 0.531195 |
| 379.5 | 2 | 0 | 0 | 0.546513 | FALSE | 0 | PDXK      | 227114 | 0.507373 |
| 605.5 | 2 | 0 | 0 | 0.570599 | FALSE | 0 | POLR3E    | 488528 | 0.531195 |
| 605.5 | 2 | 0 | 0 | 0.570599 | FALSE | 0 | PPP1CA    | 488528 | 0.531195 |
| 357.5 | 2 | 0 | 0 | 0.543564 | FALSE | 0 | PSMD11    | 220636 | 0.510745 |
| 266.5 | 2 | 0 | 0 | 0.532995 | FALSE | 0 | PTDSS2    | 71124  | 0.504753 |
| 357.5 | 2 | 0 | 0 | 0.543564 | FALSE | 0 | RAB11FIP2 | 220636 | 0.510745 |
| 357.5 | 2 | 0 | 0 | 0.543564 | FALSE | 0 | RASL10B   | 220636 | 0.510745 |
| 605.5 | 2 | 0 | 0 | 0.570599 | FALSE | 0 | SATB2     | 488528 | 0.531195 |
| 305.5 | 2 | 0 | 0 | 0.537727 | FALSE | 0 | SMARCC2   | 114370 | 0.504975 |
| 605.5 | 2 | 0 | 0 | 0.570599 | FALSE | 0 | TMEM132I  | 488528 | 0.531195 |
| 605.5 | 2 | 0 | 0 | 0.570599 | FALSE | 0 | TNRC18    | 488528 | 0.531195 |
| 484   | 2 | 0 | 0 | 0.558433 | FALSE | 0 | CENPQ     | 270558 | 0.51383  |
| 484   | 2 | 0 | 0 | 0.558433 | FALSE | 0 | CRLF3     | 270558 | 0.51383  |
| 484   | 2 | 0 | 0 | 0.558433 | FALSE | 0 | DONSON    | 270558 | 0.51383  |
| 236   | 2 | 0 | 0 | 0.529186 | FALSE | 0 | P2RY10    | 105968 | 0.506466 |
| 484   | 2 | 0 | 0 | 0.558433 | FALSE | 0 | PHACTR4   | 270558 | 0.51383  |
| 184   | 2 | 0 | 0 | 0.522919 | FALSE | 0 | PIK3C2A   | 57940  | 0.505525 |
| 236   | 2 | 0 | 0 | 0.529186 | FALSE | 0 | RIF1      | 105968 | 0.506466 |
| 171.5 | 2 | 0 | 0 | 0.521567 | FALSE | 0 | UBA3      | 91642  | 0.501471 |
| 484   | 2 | 0 | 0 | 0.558433 | FALSE | 0 | YPEL2     | 270558 | 0.51383  |
| 484   | 2 | 0 | 0 | 0.558433 | FALSE | 0 | ZNF248    | 270558 | 0.51383  |
| 158.5 | 2 | 0 | 0 | 0.519969 | FALSE | 0 | ARGFX     | 31624  | 0.501592 |
| 384.5 | 2 | 0 | 0 | 0.547619 | FALSE | 0 | CCNI2     | 72884  | 0.501963 |

|       |   |   |   |          |       |   |          |        |          |
|-------|---|---|---|----------|-------|---|----------|--------|----------|
| 84.5  | 2 | 0 | 0 | 0.509401 | FALSE | 0 | KCNJ6    | 10148  | 0.509146 |
| 384.5 | 2 | 0 | 0 | 0.547619 | FALSE | 0 | P4HB     | 72884  | 0.501963 |
| 196   | 2 | 0 | 0 | 0.524516 | FALSE | 0 | CCDC127  | 73932  | 0.502577 |
| 174   | 2 | 0 | 0 | 0.521628 | FALSE | 0 | CEBPB    | 57362  | 0.507331 |
| 174   | 2 | 0 | 0 | 0.521628 | FALSE | 0 | KLF7     | 57362  | 0.507331 |
| 174   | 2 | 0 | 0 | 0.521628 | FALSE | 0 | MAP2     | 57362  | 0.507331 |
| 422   | 2 | 0 | 0 | 0.551859 | FALSE | 0 | SPATA13  | 164278 | 0.505402 |
| 174   | 2 | 0 | 0 | 0.521628 | FALSE | 0 | SULT1B1  | 57362  | 0.507331 |
| 422   | 2 | 0 | 0 | 0.551859 | FALSE | 0 | ZC3H12C  | 164278 | 0.505402 |
| 383   | 2 | 0 | 0 | 0.547189 | FALSE | 0 | CAPN15   | 104954 | 0.504624 |
| 135   | 2 | 0 | 0 | 0.517081 | FALSE | 0 | TOR4A    | 52376  | 0.501873 |
| 248   | 2 | 0 | 0 | 0.530538 | FALSE | 0 | C2orf82  | 141906 | 0.50823  |
| 474   | 2 | 0 | 0 | 0.55745  | FALSE | 0 | FMNL3    | 349936 | 0.511905 |
| 474   | 2 | 0 | 0 | 0.55745  | FALSE | 0 | GATA2    | 349936 | 0.511905 |
| 248   | 2 | 0 | 0 | 0.530538 | FALSE | 0 | LRIG2    | 141906 | 0.50823  |
| 474   | 2 | 0 | 0 | 0.55745  | FALSE | 0 | M6PR     | 349936 | 0.511905 |
| 248   | 2 | 0 | 0 | 0.530538 | FALSE | 0 | MINOS1   | 141906 | 0.50823  |
| 474   | 2 | 0 | 0 | 0.55745  | FALSE | 0 | NKIRAS2  | 349936 | 0.511905 |
| 474   | 2 | 0 | 0 | 0.55745  | FALSE | 0 | OXA1L    | 349936 | 0.511905 |
| 474   | 2 | 0 | 0 | 0.55745  | FALSE | 0 | RAC3     | 349936 | 0.511905 |
| 248   | 2 | 0 | 0 | 0.530538 | FALSE | 0 | SLC10A6  | 141906 | 0.50823  |
| 474   | 2 | 0 | 0 | 0.55745  | FALSE | 0 | YWHAZ    | 349936 | 0.511905 |
| 248   | 2 | 0 | 0 | 0.530538 | FALSE | 0 | ZMYM1    | 141906 | 0.50823  |
| 496   | 2 | 0 | 0 | 0.560645 | FALSE | 0 | CDR1     | 334968 | 0.507172 |
| 183.5 | 2 | 0 | 0 | 0.522796 | FALSE | 0 | FADS1    | 107472 | 0.506944 |
| 496   | 2 | 0 | 0 | 0.560645 | FALSE | 0 | FBXL18   | 334968 | 0.507172 |
| 496   | 2 | 0 | 0 | 0.560645 | FALSE | 0 | PTBP1    | 334968 | 0.507172 |
| 496   | 2 | 0 | 0 | 0.560645 | FALSE | 0 | TMEM109  | 334968 | 0.507172 |
| 409.5 | 2 | 0 | 0 | 0.550015 | FALSE | 0 | ERGIC2   | 252852 | 0.508717 |
| 409.5 | 2 | 0 | 0 | 0.550015 | FALSE | 0 | INIP     | 252852 | 0.508717 |
| 409.5 | 2 | 0 | 0 | 0.550015 | FALSE | 0 | LGALS3BP | 252852 | 0.508717 |
| 409.5 | 2 | 0 | 0 | 0.550015 | FALSE | 0 | TNPO3    | 252852 | 0.508717 |
| 1358  | 1 | 0 | 0 | 0.583994 | FALSE | 0 | ABHD10   | 0      | 0        |
| 1358  | 1 | 0 | 0 | 0.583994 | FALSE | 0 | ACP2     | 0      | 0        |
| 1358  | 1 | 0 | 0 | 0.583994 | FALSE | 0 | ACTN4    | 0      | 0        |
| 1358  | 1 | 0 | 0 | 0.583994 | FALSE | 0 | ACVR2B   | 0      | 0        |
| 1358  | 1 | 0 | 0 | 0.583994 | FALSE | 0 | ACYP1    | 0      | 0        |
| 1358  | 1 | 0 | 0 | 0.583994 | FALSE | 0 | ADAT1    | 0      | 0        |
| 1358  | 1 | 0 | 0 | 0.583994 | FALSE | 0 | ADNP2    | 0      | 0        |
| 1358  | 1 | 0 | 0 | 0.583994 | FALSE | 0 | AFF4     | 0      | 0        |
| 1358  | 1 | 0 | 0 | 0.583994 | FALSE | 0 | AHCY     | 0      | 0        |
| 1358  | 1 | 0 | 0 | 0.583994 | FALSE | 0 | AMD1     | 0      | 0        |
| 1358  | 1 | 0 | 0 | 0.583994 | FALSE | 0 | ANK3     | 0      | 0        |
| 1358  | 1 | 0 | 0 | 0.583994 | FALSE | 0 | AP1S2    | 0      | 0        |
| 1358  | 1 | 0 | 0 | 0.583994 | FALSE | 0 | AP1S3    | 0      | 0        |
| 1358  | 1 | 0 | 0 | 0.583994 | FALSE | 0 | AP4E1    | 0      | 0        |
| 1358  | 1 | 0 | 0 | 0.583994 | FALSE | 0 | APOOL    | 0      | 0        |



|      |   |   |   |          |       |   |           |   |   |
|------|---|---|---|----------|-------|---|-----------|---|---|
| 1358 | 1 | 0 | 0 | 0.583994 | FALSE | 0 | APPBP2    | 0 | 0 |
| 1358 | 1 | 0 | 0 | 0.583994 | FALSE | 0 | ARF1      | 0 | 0 |
| 1358 | 1 | 0 | 0 | 0.583994 | FALSE | 0 | ARHGAP17  | 0 | 0 |
| 1358 | 1 | 0 | 0 | 0.583994 | FALSE | 0 | ARHGEF11  | 0 | 0 |
| 1358 | 1 | 0 | 0 | 0.583994 | FALSE | 0 | ARHGEF3   | 0 | 0 |
| 1358 | 1 | 0 | 0 | 0.583994 | FALSE | 0 | ARID2     | 0 | 0 |
| 1358 | 1 | 0 | 0 | 0.583994 | FALSE | 0 | ARID4A    | 0 | 0 |
| 1358 | 1 | 0 | 0 | 0.583994 | FALSE | 0 | ARL4C     | 0 | 0 |
| 1358 | 1 | 0 | 0 | 0.583994 | FALSE | 0 | ATG12     | 0 | 0 |
| 1358 | 1 | 0 | 0 | 0.583994 | FALSE | 0 | ATG4D     | 0 | 0 |
| 1358 | 1 | 0 | 0 | 0.583994 | FALSE | 0 | ATP1B1    | 0 | 0 |
| 1358 | 1 | 0 | 0 | 0.583994 | FALSE | 0 | ATP5A1    | 0 | 0 |
| 1358 | 1 | 0 | 0 | 0.583994 | FALSE | 0 | ATP5B     | 0 | 0 |
| 1358 | 1 | 0 | 0 | 0.583994 | FALSE | 0 | ATP5G3    | 0 | 0 |
| 1358 | 1 | 0 | 0 | 0.583994 | FALSE | 0 | ATP6AP2   | 0 | 0 |
| 1358 | 1 | 0 | 0 | 0.583994 | FALSE | 0 | AVPI1     | 0 | 0 |
| 1358 | 1 | 0 | 0 | 0.583994 | FALSE | 0 | B2M       | 0 | 0 |
| 1358 | 1 | 0 | 0 | 0.583994 | FALSE | 0 | BCL11B    | 0 | 0 |
| 1358 | 1 | 0 | 0 | 0.583994 | FALSE | 0 | BCL9      | 0 | 0 |
| 1358 | 1 | 0 | 0 | 0.583994 | FALSE | 0 | BEND4     | 0 | 0 |
| 1358 | 1 | 0 | 0 | 0.583994 | FALSE | 0 | BICC1     | 0 | 0 |
| 1358 | 1 | 0 | 0 | 0.583994 | FALSE | 0 | BIRC5     | 0 | 0 |
| 1358 | 1 | 0 | 0 | 0.583994 | FALSE | 0 | BLOC1S6   | 0 | 0 |
| 1358 | 1 | 0 | 0 | 0.583994 | FALSE | 0 | BMT2      | 0 | 0 |
| 1358 | 1 | 0 | 0 | 0.583994 | FALSE | 0 | BRIP1     | 0 | 0 |
| 1358 | 1 | 0 | 0 | 0.583994 | FALSE | 0 | BTRC      | 0 | 0 |
| 1358 | 1 | 0 | 0 | 0.583994 | FALSE | 0 | BZW1      | 0 | 0 |
| 1358 | 1 | 0 | 0 | 0.583994 | FALSE | 0 | BZW2      | 0 | 0 |
| 1358 | 1 | 0 | 0 | 0.583994 | FALSE | 0 | C10orf12  | 0 | 0 |
| 1358 | 1 | 0 | 0 | 0.583994 | FALSE | 0 | C10orf88  | 0 | 0 |
| 1358 | 1 | 0 | 0 | 0.583994 | FALSE | 0 | C17orf104 | 0 | 0 |
| 1358 | 1 | 0 | 0 | 0.583994 | FALSE | 0 | C19orf12  | 0 | 0 |
| 1358 | 1 | 0 | 0 | 0.583994 | FALSE | 0 | C1orf147  | 0 | 0 |
| 1358 | 1 | 0 | 0 | 0.583994 | FALSE | 0 | C1orf52   | 0 | 0 |
| 1358 | 1 | 0 | 0 | 0.583994 | FALSE | 0 | C22orf39  | 0 | 0 |
| 1358 | 1 | 0 | 0 | 0.583994 | FALSE | 0 | C3orf38   | 0 | 0 |
| 1358 | 1 | 0 | 0 | 0.583994 | FALSE | 0 | C5orf15   | 0 | 0 |
| 1358 | 1 | 0 | 0 | 0.583994 | FALSE | 0 | C7orf31   | 0 | 0 |
| 1358 | 1 | 0 | 0 | 0.583994 | FALSE | 0 | C7orf49   | 0 | 0 |
| 1358 | 1 | 0 | 0 | 0.583994 | FALSE | 0 | C7orf73   | 0 | 0 |
| 1358 | 1 | 0 | 0 | 0.583994 | FALSE | 0 | C8orf4    | 0 | 0 |
| 1358 | 1 | 0 | 0 | 0.583994 | FALSE | 0 | C8orf76   | 0 | 0 |
| 1358 | 1 | 0 | 0 | 0.583994 | FALSE | 0 | CA12      | 0 | 0 |
| 1358 | 1 | 0 | 0 | 0.583994 | FALSE | 0 | CAAP1     | 0 | 0 |
| 1358 | 1 | 0 | 0 | 0.583994 | FALSE | 0 | CAPZB     | 0 | 0 |
| 1358 | 1 | 0 | 0 | 0.583994 | FALSE | 0 | CARNMT1   | 0 | 0 |
| 1358 | 1 | 0 | 0 | 0.583994 | FALSE | 0 | CBX2      | 0 | 0 |

|      |   |   |   |          |       |   |          |   |   |
|------|---|---|---|----------|-------|---|----------|---|---|
| 1358 | 1 | 0 | 0 | 0.583994 | FALSE | 0 | CCDC186  | 0 | 0 |
| 1358 | 1 | 0 | 0 | 0.583994 | FALSE | 0 | CCNC     | 0 | 0 |
| 1358 | 1 | 0 | 0 | 0.583994 | FALSE | 0 | CCNJ     | 0 | 0 |
| 1358 | 1 | 0 | 0 | 0.583994 | FALSE | 0 | CCNY     | 0 | 0 |
| 1358 | 1 | 0 | 0 | 0.583994 | FALSE | 0 | CD38     | 0 | 0 |
| 1358 | 1 | 0 | 0 | 0.583994 | FALSE | 0 | CD55     | 0 | 0 |
| 1358 | 1 | 0 | 0 | 0.583994 | FALSE | 0 | CDH5     | 0 | 0 |
| 1358 | 1 | 0 | 0 | 0.583994 | FALSE | 0 | CDK1     | 0 | 0 |
| 1358 | 1 | 0 | 0 | 0.583994 | FALSE | 0 | CDK2AP1  | 0 | 0 |
| 1358 | 1 | 0 | 0 | 0.583994 | FALSE | 0 | CDK8     | 0 | 0 |
| 1358 | 1 | 0 | 0 | 0.583994 | FALSE | 0 | CEBPA    | 0 | 0 |
| 1358 | 1 | 0 | 0 | 0.583994 | FALSE | 0 | CEBPD    | 0 | 0 |
| 1358 | 1 | 0 | 0 | 0.583994 | FALSE | 0 | CELF2    | 0 | 0 |
| 1358 | 1 | 0 | 0 | 0.583994 | FALSE | 0 | CERK     | 0 | 0 |
| 1358 | 1 | 0 | 0 | 0.583994 | FALSE | 0 | CHAMP1   | 0 | 0 |
| 1358 | 1 | 0 | 0 | 0.583994 | FALSE | 0 | CHRA1    | 0 | 0 |
| 1358 | 1 | 0 | 0 | 0.583994 | FALSE | 0 | CHST15   | 0 | 0 |
| 1358 | 1 | 0 | 0 | 0.583994 | FALSE | 0 | CHSY1    | 0 | 0 |
| 1358 | 1 | 0 | 0 | 0.583994 | FALSE | 0 | CIAPIN1  | 0 | 0 |
| 1358 | 1 | 0 | 0 | 0.583994 | FALSE | 0 | CIC      | 0 | 0 |
| 1358 | 1 | 0 | 0 | 0.583994 | FALSE | 0 | CKAP2    | 0 | 0 |
| 1358 | 1 | 0 | 0 | 0.583994 | FALSE | 0 | CKS2     | 0 | 0 |
| 1358 | 1 | 0 | 0 | 0.583994 | FALSE | 0 | CLCN3    | 0 | 0 |
| 1358 | 1 | 0 | 0 | 0.583994 | FALSE | 0 | CLDN4    | 0 | 0 |
| 1358 | 1 | 0 | 0 | 0.583994 | FALSE | 0 | CLSPN    | 0 | 0 |
| 1358 | 1 | 0 | 0 | 0.583994 | FALSE | 0 | CLSTN1   | 0 | 0 |
| 1358 | 1 | 0 | 0 | 0.583994 | FALSE | 0 | CMIP     | 0 | 0 |
| 1358 | 1 | 0 | 0 | 0.583994 | FALSE | 0 | CMTM6    | 0 | 0 |
| 1358 | 1 | 0 | 0 | 0.583994 | FALSE | 0 | CNEP1R1  | 0 | 0 |
| 1358 | 1 | 0 | 0 | 0.583994 | FALSE | 0 | COPS7B   | 0 | 0 |
| 1358 | 1 | 0 | 0 | 0.583994 | FALSE | 0 | CPEB1    | 0 | 0 |
| 1358 | 1 | 0 | 0 | 0.583994 | FALSE | 0 | CPS1     | 0 | 0 |
| 1358 | 1 | 0 | 0 | 0.583994 | FALSE | 0 | CSF1     | 0 | 0 |
| 1358 | 1 | 0 | 0 | 0.583994 | FALSE | 0 | CSRP2    | 0 | 0 |
| 1358 | 1 | 0 | 0 | 0.583994 | FALSE | 0 | CYP51A1  | 0 | 0 |
| 1358 | 1 | 0 | 0 | 0.583994 | FALSE | 0 | DCAF12L2 | 0 | 0 |
| 1358 | 1 | 0 | 0 | 0.583994 | FALSE | 0 | DCLRE1B  | 0 | 0 |
| 1358 | 1 | 0 | 0 | 0.583994 | FALSE | 0 | DDAH1    | 0 | 0 |
| 1358 | 1 | 0 | 0 | 0.583994 | FALSE | 0 | DENND5B  | 0 | 0 |
| 1358 | 1 | 0 | 0 | 0.583994 | FALSE | 0 | DERL2    | 0 | 0 |
| 1358 | 1 | 0 | 0 | 0.583994 | FALSE | 0 | DGCR2    | 0 | 0 |
| 1358 | 1 | 0 | 0 | 0.583994 | FALSE | 0 | DHTKD1   | 0 | 0 |
| 1358 | 1 | 0 | 0 | 0.583994 | FALSE | 0 | DIDO1    | 0 | 0 |
| 1358 | 1 | 0 | 0 | 0.583994 | FALSE | 0 | DIMT1    | 0 | 0 |
| 1358 | 1 | 0 | 0 | 0.583994 | FALSE | 0 | DIP2B    | 0 | 0 |
| 1358 | 1 | 0 | 0 | 0.583994 | FALSE | 0 | DIS3     | 0 | 0 |
| 1358 | 1 | 0 | 0 | 0.583994 | FALSE | 0 | DLG3     | 0 | 0 |

|      |   |   |   |          |       |   |          |   |   |
|------|---|---|---|----------|-------|---|----------|---|---|
| 1358 | 1 | 0 | 0 | 0.583994 | FALSE | 0 | DLX1     | 0 | 0 |
| 1358 | 1 | 0 | 0 | 0.583994 | FALSE | 0 | DNAJC3   | 0 | 0 |
| 1358 | 1 | 0 | 0 | 0.583994 | FALSE | 0 | DSC1     | 0 | 0 |
| 1358 | 1 | 0 | 0 | 0.583994 | FALSE | 0 | DYRK2    | 0 | 0 |
| 1358 | 1 | 0 | 0 | 0.583994 | FALSE | 0 | EAPP     | 0 | 0 |
| 1358 | 1 | 0 | 0 | 0.583994 | FALSE | 0 | EBAG9    | 0 | 0 |
| 1358 | 1 | 0 | 0 | 0.583994 | FALSE | 0 | EEA1     | 0 | 0 |
| 1358 | 1 | 0 | 0 | 0.583994 | FALSE | 0 | EED      | 0 | 0 |
| 1358 | 1 | 0 | 0 | 0.583994 | FALSE | 0 | EFHD1    | 0 | 0 |
| 1358 | 1 | 0 | 0 | 0.583994 | FALSE | 0 | EIF2S1   | 0 | 0 |
| 1358 | 1 | 0 | 0 | 0.583994 | FALSE | 0 | EIF2S3   | 0 | 0 |
| 1358 | 1 | 0 | 0 | 0.583994 | FALSE | 0 | EIF3L    | 0 | 0 |
| 1358 | 1 | 0 | 0 | 0.583994 | FALSE | 0 | EIF3M    | 0 | 0 |
| 1358 | 1 | 0 | 0 | 0.583994 | FALSE | 0 | ELAVL3   | 0 | 0 |
| 1358 | 1 | 0 | 0 | 0.583994 | FALSE | 0 | EPB41L4B | 0 | 0 |
| 1358 | 1 | 0 | 0 | 0.583994 | FALSE | 0 | EPC2     | 0 | 0 |
| 1358 | 1 | 0 | 0 | 0.583994 | FALSE | 0 | ERBB2IP  | 0 | 0 |
| 1358 | 1 | 0 | 0 | 0.583994 | FALSE | 0 | ERH      | 0 | 0 |
| 1358 | 1 | 0 | 0 | 0.583994 | FALSE | 0 | ERO1LB   | 0 | 0 |
| 1358 | 1 | 0 | 0 | 0.583994 | FALSE | 0 | EVL      | 0 | 0 |
| 1358 | 1 | 0 | 0 | 0.583994 | FALSE | 0 | EXPH5    | 0 | 0 |
| 1358 | 1 | 0 | 0 | 0.583994 | FALSE | 0 | EYA1     | 0 | 0 |
| 1358 | 1 | 0 | 0 | 0.583994 | FALSE | 0 | EYA4     | 0 | 0 |
| 1358 | 1 | 0 | 0 | 0.583994 | FALSE | 0 | FAM103A1 | 0 | 0 |
| 1358 | 1 | 0 | 0 | 0.583994 | FALSE | 0 | FAM110C  | 0 | 0 |
| 1358 | 1 | 0 | 0 | 0.583994 | FALSE | 0 | FAM115A  | 0 | 0 |
| 1358 | 1 | 0 | 0 | 0.583994 | FALSE | 0 | FAM117B  | 0 | 0 |
| 1358 | 1 | 0 | 0 | 0.583994 | FALSE | 0 | FAM174A  | 0 | 0 |
| 1358 | 1 | 0 | 0 | 0.583994 | FALSE | 0 | FAM175A  | 0 | 0 |
| 1358 | 1 | 0 | 0 | 0.583994 | FALSE | 0 | FAM222B  | 0 | 0 |
| 1358 | 1 | 0 | 0 | 0.583994 | FALSE | 0 | FAM73A   | 0 | 0 |
| 1358 | 1 | 0 | 0 | 0.583994 | FALSE | 0 | FAM78A   | 0 | 0 |
| 1358 | 1 | 0 | 0 | 0.583994 | FALSE | 0 | FAM96A   | 0 | 0 |
| 1358 | 1 | 0 | 0 | 0.583994 | FALSE | 0 | FAM98A   | 0 | 0 |
| 1358 | 1 | 0 | 0 | 0.583994 | FALSE | 0 | FAT4     | 0 | 0 |
| 1358 | 1 | 0 | 0 | 0.583994 | FALSE | 0 | FBXL5    | 0 | 0 |
| 1358 | 1 | 0 | 0 | 0.583994 | FALSE | 0 | FBXO30   | 0 | 0 |
| 1358 | 1 | 0 | 0 | 0.583994 | FALSE | 0 | FBXW7    | 0 | 0 |
| 1358 | 1 | 0 | 0 | 0.583994 | FALSE | 0 | FGF1     | 0 | 0 |
| 1358 | 1 | 0 | 0 | 0.583994 | FALSE | 0 | FH       | 0 | 0 |
| 1358 | 1 | 0 | 0 | 0.583994 | FALSE | 0 | FKBP14   | 0 | 0 |
| 1358 | 1 | 0 | 0 | 0.583994 | FALSE | 0 | FLVCR1   | 0 | 0 |
| 1358 | 1 | 0 | 0 | 0.583994 | FALSE | 0 | FMN2     | 0 | 0 |
| 1358 | 1 | 0 | 0 | 0.583994 | FALSE | 0 | FOXF1    | 0 | 0 |
| 1358 | 1 | 0 | 0 | 0.583994 | FALSE | 0 | FOXP4    | 0 | 0 |
| 1358 | 1 | 0 | 0 | 0.583994 | FALSE | 0 | GAB1     | 0 | 0 |
| 1358 | 1 | 0 | 0 | 0.583994 | FALSE | 0 | GATA3    | 0 | 0 |

|      |   |   |   |          |       |   |           |   |   |
|------|---|---|---|----------|-------|---|-----------|---|---|
| 1358 | 1 | 0 | 0 | 0.583994 | FALSE | 0 | GCLM      | 0 | 0 |
| 1358 | 1 | 0 | 0 | 0.583994 | FALSE | 0 | GCNT1     | 0 | 0 |
| 1358 | 1 | 0 | 0 | 0.583994 | FALSE | 0 | GDE1      | 0 | 0 |
| 1358 | 1 | 0 | 0 | 0.583994 | FALSE | 0 | GFRA1     | 0 | 0 |
| 1358 | 1 | 0 | 0 | 0.583994 | FALSE | 0 | GLCC1     | 0 | 0 |
| 1358 | 1 | 0 | 0 | 0.583994 | FALSE | 0 | GLRX5     | 0 | 0 |
| 1358 | 1 | 0 | 0 | 0.583994 | FALSE | 0 | GLTSCR1   | 0 | 0 |
| 1358 | 1 | 0 | 0 | 0.583994 | FALSE | 0 | GNB1      | 0 | 0 |
| 1358 | 1 | 0 | 0 | 0.583994 | FALSE | 0 | GNB4      | 0 | 0 |
| 1358 | 1 | 0 | 0 | 0.583994 | FALSE | 0 | GNG12     | 0 | 0 |
| 1358 | 1 | 0 | 0 | 0.583994 | FALSE | 0 | GNG2      | 0 | 0 |
| 1358 | 1 | 0 | 0 | 0.583994 | FALSE | 0 | GNPNAT1   | 0 | 0 |
| 1358 | 1 | 0 | 0 | 0.583994 | FALSE | 0 | GOLGA4    | 0 | 0 |
| 1358 | 1 | 0 | 0 | 0.583994 | FALSE | 0 | GOLGA8A   | 0 | 0 |
| 1358 | 1 | 0 | 0 | 0.583994 | FALSE | 0 | GPATCH2L  | 0 | 0 |
| 1358 | 1 | 0 | 0 | 0.583994 | FALSE | 0 | GPR135    | 0 | 0 |
| 1358 | 1 | 0 | 0 | 0.583994 | FALSE | 0 | GPR27     | 0 | 0 |
| 1358 | 1 | 0 | 0 | 0.583994 | FALSE | 0 | GPR50     | 0 | 0 |
| 1358 | 1 | 0 | 0 | 0.583994 | FALSE | 0 | GRPEL2    | 0 | 0 |
| 1358 | 1 | 0 | 0 | 0.583994 | FALSE | 0 | GTF2E1    | 0 | 0 |
| 1358 | 1 | 0 | 0 | 0.583994 | FALSE | 0 | GULP1     | 0 | 0 |
| 1358 | 1 | 0 | 0 | 0.583994 | FALSE | 0 | H2AFV     | 0 | 0 |
| 1358 | 1 | 0 | 0 | 0.583994 | FALSE | 0 | H2AFZ     | 0 | 0 |
| 1358 | 1 | 0 | 0 | 0.583994 | FALSE | 0 | HABP4     | 0 | 0 |
| 1358 | 1 | 0 | 0 | 0.583994 | FALSE | 0 | HAUS6     | 0 | 0 |
| 1358 | 1 | 0 | 0 | 0.583994 | FALSE | 0 | HEATR6    | 0 | 0 |
| 1358 | 1 | 0 | 0 | 0.583994 | FALSE | 0 | HEG1      | 0 | 0 |
| 1358 | 1 | 0 | 0 | 0.583994 | FALSE | 0 | HELZ      | 0 | 0 |
| 1358 | 1 | 0 | 0 | 0.583994 | FALSE | 0 | HEXIM1    | 0 | 0 |
| 1358 | 1 | 0 | 0 | 0.583994 | FALSE | 0 | HFE       | 0 | 0 |
| 1358 | 1 | 0 | 0 | 0.583994 | FALSE | 0 | HIST2H2BE | 0 | 0 |
| 1358 | 1 | 0 | 0 | 0.583994 | FALSE | 0 | HMGB2     | 0 | 0 |
| 1358 | 1 | 0 | 0 | 0.583994 | FALSE | 0 | HNRNPAB   | 0 | 0 |
| 1358 | 1 | 0 | 0 | 0.583994 | FALSE | 0 | HNRNPDL   | 0 | 0 |
| 1358 | 1 | 0 | 0 | 0.583994 | FALSE | 0 | HOXC13    | 0 | 0 |
| 1358 | 1 | 0 | 0 | 0.583994 | FALSE | 0 | HSPD1     | 0 | 0 |
| 1358 | 1 | 0 | 0 | 0.583994 | FALSE | 0 | HSPE1-MO  | 0 | 0 |
| 1358 | 1 | 0 | 0 | 0.583994 | FALSE | 0 | ICK       | 0 | 0 |
| 1358 | 1 | 0 | 0 | 0.583994 | FALSE | 0 | IFFO2     | 0 | 0 |
| 1358 | 1 | 0 | 0 | 0.583994 | FALSE | 0 | IGIP      | 0 | 0 |
| 1358 | 1 | 0 | 0 | 0.583994 | FALSE | 0 | IL2ORB    | 0 | 0 |
| 1358 | 1 | 0 | 0 | 0.583994 | FALSE | 0 | IMPA1     | 0 | 0 |
| 1358 | 1 | 0 | 0 | 0.583994 | FALSE | 0 | IRF1      | 0 | 0 |
| 1358 | 1 | 0 | 0 | 0.583994 | FALSE | 0 | ISOC1     | 0 | 0 |
| 1358 | 1 | 0 | 0 | 0.583994 | FALSE | 0 | ITM2C     | 0 | 0 |
| 1358 | 1 | 0 | 0 | 0.583994 | FALSE | 0 | ITPRIP    | 0 | 0 |
| 1358 | 1 | 0 | 0 | 0.583994 | FALSE | 0 | JAK2      | 0 | 0 |

|      |   |   |   |          |       |   |           |   |   |
|------|---|---|---|----------|-------|---|-----------|---|---|
| 1358 | 1 | 0 | 0 | 0.583994 | FALSE | 0 | JCAD      | 0 | 0 |
| 1358 | 1 | 0 | 0 | 0.583994 | FALSE | 0 | JRKL      | 0 | 0 |
| 1358 | 1 | 0 | 0 | 0.583994 | FALSE | 0 | KCNG3     | 0 | 0 |
| 1358 | 1 | 0 | 0 | 0.583994 | FALSE | 0 | KCTD14    | 0 | 0 |
| 1358 | 1 | 0 | 0 | 0.583994 | FALSE | 0 | KHDRBS1   | 0 | 0 |
| 1358 | 1 | 0 | 0 | 0.583994 | FALSE | 0 | KHNYN     | 0 | 0 |
| 1358 | 1 | 0 | 0 | 0.583994 | FALSE | 0 | KIF2C     | 0 | 0 |
| 1358 | 1 | 0 | 0 | 0.583994 | FALSE | 0 | KL        | 0 | 0 |
| 1358 | 1 | 0 | 0 | 0.583994 | FALSE | 0 | KLHL23    | 0 | 0 |
| 1358 | 1 | 0 | 0 | 0.583994 | FALSE | 0 | KPNA2     | 0 | 0 |
| 1358 | 1 | 0 | 0 | 0.583994 | FALSE | 0 | KPNA4     | 0 | 0 |
| 1358 | 1 | 0 | 0 | 0.583994 | FALSE | 0 | LARP4B    | 0 | 0 |
| 1358 | 1 | 0 | 0 | 0.583994 | FALSE | 0 | LATS2     | 0 | 0 |
| 1358 | 1 | 0 | 0 | 0.583994 | FALSE | 0 | LDB1      | 0 | 0 |
| 1358 | 1 | 0 | 0 | 0.583994 | FALSE | 0 | LEFTY1    | 0 | 0 |
| 1358 | 1 | 0 | 0 | 0.583994 | FALSE | 0 | LIG4      | 0 | 0 |
| 1358 | 1 | 0 | 0 | 0.583994 | FALSE | 0 | LMNB1     | 0 | 0 |
| 1358 | 1 | 0 | 0 | 0.583994 | FALSE | 0 | LNK2      | 0 | 0 |
| 1358 | 1 | 0 | 0 | 0.583994 | FALSE | 0 | LONRF2    | 0 | 0 |
| 1358 | 1 | 0 | 0 | 0.583994 | FALSE | 0 | LONRF3    | 0 | 0 |
| 1358 | 1 | 0 | 0 | 0.583994 | FALSE | 0 | LRCH2     | 0 | 0 |
| 1358 | 1 | 0 | 0 | 0.583994 | FALSE | 0 | LRP12     | 0 | 0 |
| 1358 | 1 | 0 | 0 | 0.583994 | FALSE | 0 | LRRC1     | 0 | 0 |
| 1358 | 1 | 0 | 0 | 0.583994 | FALSE | 0 | LSM14A    | 0 | 0 |
| 1358 | 1 | 0 | 0 | 0.583994 | FALSE | 0 | LUC7L3    | 0 | 0 |
| 1358 | 1 | 0 | 0 | 0.583994 | FALSE | 0 | LYSMD3    | 0 | 0 |
| 1358 | 1 | 0 | 0 | 0.583994 | FALSE | 0 | MAD2L1    | 0 | 0 |
| 1358 | 1 | 0 | 0 | 0.583994 | FALSE | 0 | MAGI1     | 0 | 0 |
| 1358 | 1 | 0 | 0 | 0.583994 | FALSE | 0 | MAK16     | 0 | 0 |
| 1358 | 1 | 0 | 0 | 0.583994 | FALSE | 0 | MANF      | 0 | 0 |
| 1358 | 1 | 0 | 0 | 0.583994 | FALSE | 0 | MAP3K13   | 0 | 0 |
| 1358 | 1 | 0 | 0 | 0.583994 | FALSE | 0 | MAP3K4    | 0 | 0 |
| 1358 | 1 | 0 | 0 | 0.583994 | FALSE | 0 | MAP7D3    | 0 | 0 |
| 1358 | 1 | 0 | 0 | 0.583994 | FALSE | 0 | MAST4     | 0 | 0 |
| 1358 | 1 | 0 | 0 | 0.583994 | FALSE | 0 | MASTL     | 0 | 0 |
| 1358 | 1 | 0 | 0 | 0.583994 | FALSE | 0 | MAT2B     | 0 | 0 |
| 1358 | 1 | 0 | 0 | 0.583994 | FALSE | 0 | MBD1      | 0 | 0 |
| 1358 | 1 | 0 | 0 | 0.583994 | FALSE | 0 | MBTD1     | 0 | 0 |
| 1358 | 1 | 0 | 0 | 0.583994 | FALSE | 0 | MCUR1     | 0 | 0 |
| 1358 | 1 | 0 | 0 | 0.583994 | FALSE | 0 | MED6      | 0 | 0 |
| 1358 | 1 | 0 | 0 | 0.583994 | FALSE | 0 | MEGF9     | 0 | 0 |
| 1358 | 1 | 0 | 0 | 0.583994 | FALSE | 0 | MEIS1     | 0 | 0 |
| 1358 | 1 | 0 | 0 | 0.583994 | FALSE | 0 | MESDC2    | 0 | 0 |
| 1358 | 1 | 0 | 0 | 0.583994 | FALSE | 0 | METTL3    | 0 | 0 |
| 1358 | 1 | 0 | 0 | 0.583994 | FALSE | 0 | MGAT5     | 0 | 0 |
| 1358 | 1 | 0 | 0 | 0.583994 | FALSE | 0 | MIRLET7Bf | 0 | 0 |
| 1358 | 1 | 0 | 0 | 0.583994 | FALSE | 0 | MXN1      | 0 | 0 |

|      |   |   |   |          |       |   |         |   |   |
|------|---|---|---|----------|-------|---|---------|---|---|
| 1358 | 1 | 0 | 0 | 0.583994 | FALSE | 0 | MOB3C   | 0 | 0 |
| 1358 | 1 | 0 | 0 | 0.583994 | FALSE | 0 | MOB4    | 0 | 0 |
| 1358 | 1 | 0 | 0 | 0.583994 | FALSE | 0 | MON2    | 0 | 0 |
| 1358 | 1 | 0 | 0 | 0.583994 | FALSE | 0 | MPP5    | 0 | 0 |
| 1358 | 1 | 0 | 0 | 0.583994 | FALSE | 0 | MPPE1   | 0 | 0 |
| 1358 | 1 | 0 | 0 | 0.583994 | FALSE | 0 | MRGBP   | 0 | 0 |
| 1358 | 1 | 0 | 0 | 0.583994 | FALSE | 0 | MRPL35  | 0 | 0 |
| 1358 | 1 | 0 | 0 | 0.583994 | FALSE | 0 | MRPL42  | 0 | 0 |
| 1358 | 1 | 0 | 0 | 0.583994 | FALSE | 0 | MRPL44  | 0 | 0 |
| 1358 | 1 | 0 | 0 | 0.583994 | FALSE | 0 | MRPS12  | 0 | 0 |
| 1358 | 1 | 0 | 0 | 0.583994 | FALSE | 0 | MSH2    | 0 | 0 |
| 1358 | 1 | 0 | 0 | 0.583994 | FALSE | 0 | MSI2    | 0 | 0 |
| 1358 | 1 | 0 | 0 | 0.583994 | FALSE | 0 | MTHFD2  | 0 | 0 |
| 1358 | 1 | 0 | 0 | 0.583994 | FALSE | 0 | MTMR7   | 0 | 0 |
| 1358 | 1 | 0 | 0 | 0.583994 | FALSE | 0 | MTOR    | 0 | 0 |
| 1358 | 1 | 0 | 0 | 0.583994 | FALSE | 0 | MTSS1L  | 0 | 0 |
| 1358 | 1 | 0 | 0 | 0.583994 | FALSE | 0 | MYH6    | 0 | 0 |
| 1358 | 1 | 0 | 0 | 0.583994 | FALSE | 0 | MYO9A   | 0 | 0 |
| 1358 | 1 | 0 | 0 | 0.583994 | FALSE | 0 | N4BP2L2 | 0 | 0 |
| 1358 | 1 | 0 | 0 | 0.583994 | FALSE | 0 | NACA2   | 0 | 0 |
| 1358 | 1 | 0 | 0 | 0.583994 | FALSE | 0 | NANOGNB | 0 | 0 |
| 1358 | 1 | 0 | 0 | 0.583994 | FALSE | 0 | NARS    | 0 | 0 |
| 1358 | 1 | 0 | 0 | 0.583994 | FALSE | 0 | NCL     | 0 | 0 |
| 1358 | 1 | 0 | 0 | 0.583994 | FALSE | 0 | NDFIP1  | 0 | 0 |
| 1358 | 1 | 0 | 0 | 0.583994 | FALSE | 0 | NDNL2   | 0 | 0 |
| 1358 | 1 | 0 | 0 | 0.583994 | FALSE | 0 | NDUFA2  | 0 | 0 |
| 1358 | 1 | 0 | 0 | 0.583994 | FALSE | 0 | NECAB1  | 0 | 0 |
| 1358 | 1 | 0 | 0 | 0.583994 | FALSE | 0 | NEK4    | 0 | 0 |
| 1358 | 1 | 0 | 0 | 0.583994 | FALSE | 0 | NETO2   | 0 | 0 |
| 1358 | 1 | 0 | 0 | 0.583994 | FALSE | 0 | NFE2L2  | 0 | 0 |
| 1358 | 1 | 0 | 0 | 0.583994 | FALSE | 0 | NIP7    | 0 | 0 |
| 1358 | 1 | 0 | 0 | 0.583994 | FALSE | 0 | NKAP    | 0 | 0 |
| 1358 | 1 | 0 | 0 | 0.583994 | FALSE | 0 | NKRF    | 0 | 0 |
| 1358 | 1 | 0 | 0 | 0.583994 | FALSE | 0 | NKX3-2  | 0 | 0 |
| 1358 | 1 | 0 | 0 | 0.583994 | FALSE | 0 | NKX6-1  | 0 | 0 |
| 1358 | 1 | 0 | 0 | 0.583994 | FALSE | 0 | NLK     | 0 | 0 |
| 1358 | 1 | 0 | 0 | 0.583994 | FALSE | 0 | NOP2    | 0 | 0 |
| 1358 | 1 | 0 | 0 | 0.583994 | FALSE | 0 | NPC1L1  | 0 | 0 |
| 1358 | 1 | 0 | 0 | 0.583994 | FALSE | 0 | NR2F2   | 0 | 0 |
| 1358 | 1 | 0 | 0 | 0.583994 | FALSE | 0 | NSA2    | 0 | 0 |
| 1358 | 1 | 0 | 0 | 0.583994 | FALSE | 0 | NT5C3A  | 0 | 0 |
| 1358 | 1 | 0 | 0 | 0.583994 | FALSE | 0 | NUP205  | 0 | 0 |
| 1358 | 1 | 0 | 0 | 0.583994 | FALSE | 0 | NUP62   | 0 | 0 |
| 1358 | 1 | 0 | 0 | 0.583994 | FALSE | 0 | NUP88   | 0 | 0 |
| 1358 | 1 | 0 | 0 | 0.583994 | FALSE | 0 | NXT2    | 0 | 0 |
| 1358 | 1 | 0 | 0 | 0.583994 | FALSE | 0 | OPN3    | 0 | 0 |
| 1358 | 1 | 0 | 0 | 0.583994 | FALSE | 0 | OSBPL9  | 0 | 0 |

|      |   |   |   |          |       |   |           |   |   |
|------|---|---|---|----------|-------|---|-----------|---|---|
| 1358 | 1 | 0 | 0 | 0.583994 | FALSE | 0 | OSGIN2    | 0 | 0 |
| 1358 | 1 | 0 | 0 | 0.583994 | FALSE | 0 | OTUD3     | 0 | 0 |
| 1358 | 1 | 0 | 0 | 0.583994 | FALSE | 0 | OVGP1     | 0 | 0 |
| 1358 | 1 | 0 | 0 | 0.583994 | FALSE | 0 | OXR1      | 0 | 0 |
| 1358 | 1 | 0 | 0 | 0.583994 | FALSE | 0 | PABPC1L2/ | 0 | 0 |
| 1358 | 1 | 0 | 0 | 0.583994 | FALSE | 0 | PAK3      | 0 | 0 |
| 1358 | 1 | 0 | 0 | 0.583994 | FALSE | 0 | PAPD7     | 0 | 0 |
| 1358 | 1 | 0 | 0 | 0.583994 | FALSE | 0 | PAQR7     | 0 | 0 |
| 1358 | 1 | 0 | 0 | 0.583994 | FALSE | 0 | PCCB      | 0 | 0 |
| 1358 | 1 | 0 | 0 | 0.583994 | FALSE | 0 | PCDHB16   | 0 | 0 |
| 1358 | 1 | 0 | 0 | 0.583994 | FALSE | 0 | PCNXL2    | 0 | 0 |
| 1358 | 1 | 0 | 0 | 0.583994 | FALSE | 0 | PDCD4     | 0 | 0 |
| 1358 | 1 | 0 | 0 | 0.583994 | FALSE | 0 | PDE4D     | 0 | 0 |
| 1358 | 1 | 0 | 0 | 0.583994 | FALSE | 0 | PDHX      | 0 | 0 |
| 1358 | 1 | 0 | 0 | 0.583994 | FALSE | 0 | PEBP1     | 0 | 0 |
| 1358 | 1 | 0 | 0 | 0.583994 | FALSE | 0 | PEX5L     | 0 | 0 |
| 1358 | 1 | 0 | 0 | 0.583994 | FALSE | 0 | PGBD4     | 0 | 0 |
| 1358 | 1 | 0 | 0 | 0.583994 | FALSE | 0 | PGM2      | 0 | 0 |
| 1358 | 1 | 0 | 0 | 0.583994 | FALSE | 0 | PGRMC2    | 0 | 0 |
| 1358 | 1 | 0 | 0 | 0.583994 | FALSE | 0 | PIAS1     | 0 | 0 |
| 1358 | 1 | 0 | 0 | 0.583994 | FALSE | 0 | PIGC      | 0 | 0 |
| 1358 | 1 | 0 | 0 | 0.583994 | FALSE | 0 | PIK3C2B   | 0 | 0 |
| 1358 | 1 | 0 | 0 | 0.583994 | FALSE | 0 | PIP5K1C   | 0 | 0 |
| 1358 | 1 | 0 | 0 | 0.583994 | FALSE | 0 | PITPNB    | 0 | 0 |
| 1358 | 1 | 0 | 0 | 0.583994 | FALSE | 0 | PKIA      | 0 | 0 |
| 1358 | 1 | 0 | 0 | 0.583994 | FALSE | 0 | PLA2R1    | 0 | 0 |
| 1358 | 1 | 0 | 0 | 0.583994 | FALSE | 0 | PLEKHA8   | 0 | 0 |
| 1358 | 1 | 0 | 0 | 0.583994 | FALSE | 0 | PMF1      | 0 | 0 |
| 1358 | 1 | 0 | 0 | 0.583994 | FALSE | 0 | PNISR     | 0 | 0 |
| 1358 | 1 | 0 | 0 | 0.583994 | FALSE | 0 | PNLIPRP2  | 0 | 0 |
| 1358 | 1 | 0 | 0 | 0.583994 | FALSE | 0 | POLR1E    | 0 | 0 |
| 1358 | 1 | 0 | 0 | 0.583994 | FALSE | 0 | POLR3K    | 0 | 0 |
| 1358 | 1 | 0 | 0 | 0.583994 | FALSE | 0 | POM121    | 0 | 0 |
| 1358 | 1 | 0 | 0 | 0.583994 | FALSE | 0 | POMP      | 0 | 0 |
| 1358 | 1 | 0 | 0 | 0.583994 | FALSE | 0 | POMT1     | 0 | 0 |
| 1358 | 1 | 0 | 0 | 0.583994 | FALSE | 0 | PPAP2B    | 0 | 0 |
| 1358 | 1 | 0 | 0 | 0.583994 | FALSE | 0 | PPP1CB    | 0 | 0 |
| 1358 | 1 | 0 | 0 | 0.583994 | FALSE | 0 | PPP1R2    | 0 | 0 |
| 1358 | 1 | 0 | 0 | 0.583994 | FALSE | 0 | PPP2R3A   | 0 | 0 |
| 1358 | 1 | 0 | 0 | 0.583994 | FALSE | 0 | PPP4R1    | 0 | 0 |
| 1358 | 1 | 0 | 0 | 0.583994 | FALSE | 0 | PPP6C     | 0 | 0 |
| 1358 | 1 | 0 | 0 | 0.583994 | FALSE | 0 | PRDM16    | 0 | 0 |
| 1358 | 1 | 0 | 0 | 0.583994 | FALSE | 0 | PRICKLE1  | 0 | 0 |
| 1358 | 1 | 0 | 0 | 0.583994 | FALSE | 0 | PRKAB1    | 0 | 0 |
| 1358 | 1 | 0 | 0 | 0.583994 | FALSE | 0 | PRPF38B   | 0 | 0 |
| 1358 | 1 | 0 | 0 | 0.583994 | FALSE | 0 | PRR11     | 0 | 0 |
| 1358 | 1 | 0 | 0 | 0.583994 | FALSE | 0 | PRRC1     | 0 | 0 |

|      |   |   |   |          |       |   |         |   |   |
|------|---|---|---|----------|-------|---|---------|---|---|
| 1358 | 1 | 0 | 0 | 0.583994 | FALSE | 0 | PSEN1   | 0 | 0 |
| 1358 | 1 | 0 | 0 | 0.583994 | FALSE | 0 | PSMB1   | 0 | 0 |
| 1358 | 1 | 0 | 0 | 0.583994 | FALSE | 0 | PSMD1   | 0 | 0 |
| 1358 | 1 | 0 | 0 | 0.583994 | FALSE | 0 | PSME4   | 0 | 0 |
| 1358 | 1 | 0 | 0 | 0.583994 | FALSE | 0 | PTGER4  | 0 | 0 |
| 1358 | 1 | 0 | 0 | 0.583994 | FALSE | 0 | PTGFRN  | 0 | 0 |
| 1358 | 1 | 0 | 0 | 0.583994 | FALSE | 0 | PTPLAD1 | 0 | 0 |
| 1358 | 1 | 0 | 0 | 0.583994 | FALSE | 0 | PTPN1   | 0 | 0 |
| 1358 | 1 | 0 | 0 | 0.583994 | FALSE | 0 | PTPN22  | 0 | 0 |
| 1358 | 1 | 0 | 0 | 0.583994 | FALSE | 0 | PTPN9   | 0 | 0 |
| 1358 | 1 | 0 | 0 | 0.583994 | FALSE | 0 | PUS7L   | 0 | 0 |
| 1358 | 1 | 0 | 0 | 0.583994 | FALSE | 0 | PVRL1   | 0 | 0 |
| 1358 | 1 | 0 | 0 | 0.583994 | FALSE | 0 | PVRL2   | 0 | 0 |
| 1358 | 1 | 0 | 0 | 0.583994 | FALSE | 0 | PYGO2   | 0 | 0 |
| 1358 | 1 | 0 | 0 | 0.583994 | FALSE | 0 | QDPR    | 0 | 0 |
| 1358 | 1 | 0 | 0 | 0.583994 | FALSE | 0 | RAB39B  | 0 | 0 |
| 1358 | 1 | 0 | 0 | 0.583994 | FALSE | 0 | RAB5A   | 0 | 0 |
| 1358 | 1 | 0 | 0 | 0.583994 | FALSE | 0 | RALBP1  | 0 | 0 |
| 1358 | 1 | 0 | 0 | 0.583994 | FALSE | 0 | RANBP2  | 0 | 0 |
| 1358 | 1 | 0 | 0 | 0.583994 | FALSE | 0 | RANBP9  | 0 | 0 |
| 1358 | 1 | 0 | 0 | 0.583994 | FALSE | 0 | RARS    | 0 | 0 |
| 1358 | 1 | 0 | 0 | 0.583994 | FALSE | 0 | RARS2   | 0 | 0 |
| 1358 | 1 | 0 | 0 | 0.583994 | FALSE | 0 | RBL2    | 0 | 0 |
| 1358 | 1 | 0 | 0 | 0.583994 | FALSE | 0 | RCN2    | 0 | 0 |
| 1358 | 1 | 0 | 0 | 0.583994 | FALSE | 0 | RFC1    | 0 | 0 |
| 1358 | 1 | 0 | 0 | 0.583994 | FALSE | 0 | RIOK2   | 0 | 0 |
| 1358 | 1 | 0 | 0 | 0.583994 | FALSE | 0 | RIPK4   | 0 | 0 |
| 1358 | 1 | 0 | 0 | 0.583994 | FALSE | 0 | RMI1    | 0 | 0 |
| 1358 | 1 | 0 | 0 | 0.583994 | FALSE | 0 | RNASE1  | 0 | 0 |
| 1358 | 1 | 0 | 0 | 0.583994 | FALSE | 0 | RNASE4  | 0 | 0 |
| 1358 | 1 | 0 | 0 | 0.583994 | FALSE | 0 | RNF114  | 0 | 0 |
| 1358 | 1 | 0 | 0 | 0.583994 | FALSE | 0 | RNF152  | 0 | 0 |
| 1358 | 1 | 0 | 0 | 0.583994 | FALSE | 0 | RNF19A  | 0 | 0 |
| 1358 | 1 | 0 | 0 | 0.583994 | FALSE | 0 | RNF219  | 0 | 0 |
| 1358 | 1 | 0 | 0 | 0.583994 | FALSE | 0 | RPL17   | 0 | 0 |
| 1358 | 1 | 0 | 0 | 0.583994 | FALSE | 0 | RPRD1A  | 0 | 0 |
| 1358 | 1 | 0 | 0 | 0.583994 | FALSE | 0 | RPRD1B  | 0 | 0 |
| 1358 | 1 | 0 | 0 | 0.583994 | FALSE | 0 | RPS20   | 0 | 0 |
| 1358 | 1 | 0 | 0 | 0.583994 | FALSE | 0 | RRM2    | 0 | 0 |
| 1358 | 1 | 0 | 0 | 0.583994 | FALSE | 0 | RUNX1   | 0 | 0 |
| 1358 | 1 | 0 | 0 | 0.583994 | FALSE | 0 | SAMSN1  | 0 | 0 |
| 1358 | 1 | 0 | 0 | 0.583994 | FALSE | 0 | SCAI    | 0 | 0 |
| 1358 | 1 | 0 | 0 | 0.583994 | FALSE | 0 | SCAMP1  | 0 | 0 |
| 1358 | 1 | 0 | 0 | 0.583994 | FALSE | 0 | SCAP    | 0 | 0 |
| 1358 | 1 | 0 | 0 | 0.583994 | FALSE | 0 | SCFD2   | 0 | 0 |
| 1358 | 1 | 0 | 0 | 0.583994 | FALSE | 0 | SCYL2   | 0 | 0 |
| 1358 | 1 | 0 | 0 | 0.583994 | FALSE | 0 | SEC16A  | 0 | 0 |



|          |     |   |   |          |       |   |                     |          |   |
|----------|-----|---|---|----------|-------|---|---------------------|----------|---|
| 1358     | 1   | 0 | 0 | 0.583994 | FALSE | 0 | SEC23A              | 0        | 0 |
| 1358     | 1   | 0 | 0 | 0.583994 | FALSE | 0 | SEC24A              | 0        | 0 |
| 1358     | 1   | 0 | 0 | 0.583994 | FALSE | 0 | SEMA3C              | 0        | 0 |
| 1358     | 1   | 0 | 0 | 0.583994 | FALSE | 0 | SENP6               | 0        | 0 |
| 1358     | 1   | 0 | 0 | 0.583994 | FALSE | 0 | SFPQ                | 0        | 0 |
| 1358     | 1   | 0 | 0 | 0.583994 | FALSE | 0 | SGOL2               | 0        | 0 |
| 1358     | 1   | 0 | 0 | 0.583994 | FALSE | 0 | SHANK2              | 0        | 0 |
| 1358     | 1   | 0 | 0 | 0.583994 | FALSE | 0 | SKOR1               | 0        | 0 |
| 1358     | 1   | 0 | 0 | 0.583994 | FALSE | 0 | SKP2                | 0        | 0 |
| 1358     | 1   | 0 | 0 | 0.583994 | FALSE | 0 | SLAIN2              | 0        | 0 |
| 1358     | 1   | 0 | 0 | 0.583994 | FALSE | 0 | SLC16A1             | 0        | 0 |
| 1358     | 1   | 0 | 0 | 0.583994 | FALSE | 0 | SLC1A1              | 0        | 0 |
| 1358     | 1   | 0 | 0 | 0.583994 | FALSE | 0 | SLC20A2             | 0        | 0 |
| 1358     | 1   | 0 | 0 | 0.583994 | FALSE | 0 | SLC22A23            | 0        | 0 |
| 1358     | 1   | 0 | 0 | 0.583994 | FALSE | 0 | SLC25A3             | 0        | 0 |
| 1358     | 1   | 0 | 0 | 0.583994 | FALSE | 0 | SLC29A2             | 0        | 0 |
| 1358     | 1   | 0 | 0 | 0.583994 | FALSE | 0 | SLC30A5             | 0        | 0 |
| 1358     | 1   | 0 | 0 | 0.583994 | FALSE | 0 | SLC35F5             | 0        | 0 |
| 1358     | 1   | 0 | 0 | 0.583994 | FALSE | 0 | SLC39A14            | 0        | 0 |
| 1358     | 1   | 0 | 0 | 0.583994 | FALSE | 0 | SLC39A6             | 0        | 0 |
| 1358     | 1   | 0 | 0 | 0.583994 | FALSE | 0 | SLC44A1             | 0        | 0 |
| 1358     | 1   | 0 | 0 | 0.583994 | FALSE | 0 | SLC4A4              | 0        | 0 |
| 1358     | 1   | 0 | 0 | 0.583994 | FALSE | 0 | SLC7A2              | 0        | 0 |
| 1358     | 1   | 0 | 0 | 0.583994 | FALSE | 0 | SLMO2               | 0        | 0 |
| 2.495868 | 121 | 0 | 0 | 0.673272 | TRUE  | 0 | hsa-miR-14 27800986 | 0.093492 |   |
| 1358     | 1   | 0 | 0 | 0.583994 | FALSE | 0 | SMAD7               | 0        | 0 |
| 1358     | 1   | 0 | 0 | 0.583994 | FALSE | 0 | SMAD9               | 0        | 0 |
| 1358     | 1   | 0 | 0 | 0.583994 | FALSE | 0 | SMARCD1             | 0        | 0 |
| 1358     | 1   | 0 | 0 | 0.583994 | FALSE | 0 | SMC3                | 0        | 0 |
| 1358     | 1   | 0 | 0 | 0.583994 | FALSE | 0 | SMN2                | 0        | 0 |
| 1358     | 1   | 0 | 0 | 0.583994 | FALSE | 0 | SNHG1               | 0        | 0 |
| 1358     | 1   | 0 | 0 | 0.583994 | FALSE | 0 | SNN                 | 0        | 0 |
| 1358     | 1   | 0 | 0 | 0.583994 | FALSE | 0 | SNRNP35             | 0        | 0 |
| 1358     | 1   | 0 | 0 | 0.583994 | FALSE | 0 | SNTB2               | 0        | 0 |
| 1358     | 1   | 0 | 0 | 0.583994 | FALSE | 0 | SNX31               | 0        | 0 |
| 1358     | 1   | 0 | 0 | 0.583994 | FALSE | 0 | SOD1                | 0        | 0 |
| 1358     | 1   | 0 | 0 | 0.583994 | FALSE | 0 | SP9                 | 0        | 0 |
| 1358     | 1   | 0 | 0 | 0.583994 | FALSE | 0 | SPAG1               | 0        | 0 |
| 1358     | 1   | 0 | 0 | 0.583994 | FALSE | 0 | SPG11               | 0        | 0 |
| 1358     | 1   | 0 | 0 | 0.583994 | FALSE | 0 | SPINT1              | 0        | 0 |
| 1358     | 1   | 0 | 0 | 0.583994 | FALSE | 0 | SPIRE1              | 0        | 0 |
| 1358     | 1   | 0 | 0 | 0.583994 | FALSE | 0 | SPOP                | 0        | 0 |
| 1358     | 1   | 0 | 0 | 0.583994 | FALSE | 0 | SPPL2A              | 0        | 0 |
| 1358     | 1   | 0 | 0 | 0.583994 | FALSE | 0 | SPRTN               | 0        | 0 |
| 1358     | 1   | 0 | 0 | 0.583994 | FALSE | 0 | SQLE                | 0        | 0 |
| 1358     | 1   | 0 | 0 | 0.583994 | FALSE | 0 | SREBF2              | 0        | 0 |
| 1358     | 1   | 0 | 0 | 0.583994 | FALSE | 0 | SREK1IP1            | 0        | 0 |

|      |   |   |   |          |       |   |           |   |   |
|------|---|---|---|----------|-------|---|-----------|---|---|
| 1358 | 1 | 0 | 0 | 0.583994 | FALSE | 0 | SRF       | 0 | 0 |
| 1358 | 1 | 0 | 0 | 0.583994 | FALSE | 0 | SRP19     | 0 | 0 |
| 1358 | 1 | 0 | 0 | 0.583994 | FALSE | 0 | SRRT      | 0 | 0 |
| 1358 | 1 | 0 | 0 | 0.583994 | FALSE | 0 | SRSF10    | 0 | 0 |
| 1358 | 1 | 0 | 0 | 0.583994 | FALSE | 0 | SSFA2     | 0 | 0 |
| 1358 | 1 | 0 | 0 | 0.583994 | FALSE | 0 | SSX2IP    | 0 | 0 |
| 1358 | 1 | 0 | 0 | 0.583994 | FALSE | 0 | STAMBP    | 0 | 0 |
| 1358 | 1 | 0 | 0 | 0.583994 | FALSE | 0 | STARD4    | 0 | 0 |
| 1358 | 1 | 0 | 0 | 0.583994 | FALSE | 0 | STAU2     | 0 | 0 |
| 1358 | 1 | 0 | 0 | 0.583994 | FALSE | 0 | STX3      | 0 | 0 |
| 1358 | 1 | 0 | 0 | 0.583994 | FALSE | 0 | SUMO3     | 0 | 0 |
| 1358 | 1 | 0 | 0 | 0.583994 | FALSE | 0 | SUV39H2   | 0 | 0 |
| 1358 | 1 | 0 | 0 | 0.583994 | FALSE | 0 | SYNRG     | 0 | 0 |
| 1358 | 1 | 0 | 0 | 0.583994 | FALSE | 0 | TAPBP     | 0 | 0 |
| 1358 | 1 | 0 | 0 | 0.583994 | FALSE | 0 | TBC1D12   | 0 | 0 |
| 1358 | 1 | 0 | 0 | 0.583994 | FALSE | 0 | TBX18     | 0 | 0 |
| 1358 | 1 | 0 | 0 | 0.583994 | FALSE | 0 | TCF19     | 0 | 0 |
| 1358 | 1 | 0 | 0 | 0.583994 | FALSE | 0 | TCP11L2   | 0 | 0 |
| 1358 | 1 | 0 | 0 | 0.583994 | FALSE | 0 | TEAD1     | 0 | 0 |
| 1358 | 1 | 0 | 0 | 0.583994 | FALSE | 0 | TENM3     | 0 | 0 |
| 1358 | 1 | 0 | 0 | 0.583994 | FALSE | 0 | TEP1      | 0 | 0 |
| 1358 | 1 | 0 | 0 | 0.583994 | FALSE | 0 | TFB2M     | 0 | 0 |
| 1358 | 1 | 0 | 0 | 0.583994 | FALSE | 0 | TFIP11    | 0 | 0 |
| 1358 | 1 | 0 | 0 | 0.583994 | FALSE | 0 | THAP2     | 0 | 0 |
| 1358 | 1 | 0 | 0 | 0.583994 | FALSE | 0 | THUMPD3   | 0 | 0 |
| 1358 | 1 | 0 | 0 | 0.583994 | FALSE | 0 | TIMP3     | 0 | 0 |
| 1358 | 1 | 0 | 0 | 0.583994 | FALSE | 0 | TLK1      | 0 | 0 |
| 1358 | 1 | 0 | 0 | 0.583994 | FALSE | 0 | TMED7     | 0 | 0 |
| 1358 | 1 | 0 | 0 | 0.583994 | FALSE | 0 | TMED7-TIC | 0 | 0 |
| 1358 | 1 | 0 | 0 | 0.583994 | FALSE | 0 | TMEM126I  | 0 | 0 |
| 1358 | 1 | 0 | 0 | 0.583994 | FALSE | 0 | TMEM161I  | 0 | 0 |
| 1358 | 1 | 0 | 0 | 0.583994 | FALSE | 0 | TMEM168   | 0 | 0 |
| 1358 | 1 | 0 | 0 | 0.583994 | FALSE | 0 | TMEM170I  | 0 | 0 |
| 1358 | 1 | 0 | 0 | 0.583994 | FALSE | 0 | TMEM181   | 0 | 0 |
| 1358 | 1 | 0 | 0 | 0.583994 | FALSE | 0 | TMEM55A   | 0 | 0 |
| 1358 | 1 | 0 | 0 | 0.583994 | FALSE | 0 | TNKS2     | 0 | 0 |
| 1358 | 1 | 0 | 0 | 0.583994 | FALSE | 0 | TOMM6     | 0 | 0 |
| 1358 | 1 | 0 | 0 | 0.583994 | FALSE | 0 | TOP1      | 0 | 0 |
| 1358 | 1 | 0 | 0 | 0.583994 | FALSE | 0 | TRERF1    | 0 | 0 |
| 1358 | 1 | 0 | 0 | 0.583994 | FALSE | 0 | TRIAP1    | 0 | 0 |
| 1358 | 1 | 0 | 0 | 0.583994 | FALSE | 0 | TRIB1     | 0 | 0 |
| 1358 | 1 | 0 | 0 | 0.583994 | FALSE | 0 | TRIM25    | 0 | 0 |
| 1358 | 1 | 0 | 0 | 0.583994 | FALSE | 0 | TRIQK     | 0 | 0 |
| 1358 | 1 | 0 | 0 | 0.583994 | FALSE | 0 | TSC22D2   | 0 | 0 |
| 1358 | 1 | 0 | 0 | 0.583994 | FALSE | 0 | TSHZ2     | 0 | 0 |
| 1358 | 1 | 0 | 0 | 0.583994 | FALSE | 0 | TSPYL4    | 0 | 0 |
| 1358 | 1 | 0 | 0 | 0.583994 | FALSE | 0 | TST       | 0 | 0 |

|          |     |   |   |          |       |   |            |          |          |
|----------|-----|---|---|----------|-------|---|------------|----------|----------|
| 1358     | 1   | 0 | 0 | 0.583994 | FALSE | 0 | TTC37      | 0        | 0        |
| 1358     | 1   | 0 | 0 | 0.583994 | FALSE | 0 | TVP23B     | 0        | 0        |
| 1358     | 1   | 0 | 0 | 0.583994 | FALSE | 0 | UBE2B      | 0        | 0        |
| 1358     | 1   | 0 | 0 | 0.583994 | FALSE | 0 | UBE2D1     | 0        | 0        |
| 1358     | 1   | 0 | 0 | 0.583994 | FALSE | 0 | UBE2F      | 0        | 0        |
| 1358     | 1   | 0 | 0 | 0.583994 | FALSE | 0 | UBE2O      | 0        | 0        |
| 1358     | 1   | 0 | 0 | 0.583994 | FALSE | 0 | UBE3C      | 0        | 0        |
| 1358     | 1   | 0 | 0 | 0.583994 | FALSE | 0 | UBP1       | 0        | 0        |
| 1358     | 1   | 0 | 0 | 0.583994 | FALSE | 0 | UBR4       | 0        | 0        |
| 1358     | 1   | 0 | 0 | 0.583994 | FALSE | 0 | UBTD2      | 0        | 0        |
| 1358     | 1   | 0 | 0 | 0.583994 | FALSE | 0 | UGT2A1     | 0        | 0        |
| 2.142636 | 645 | 0 | 0 | 0.70682  | TRUE  | 0 | hsa-miR-14 | 5.91E+08 | 0.067214 |
| 1358     | 1   | 0 | 0 | 0.583994 | FALSE | 0 | UGT2A2     | 0        | 0        |
| 1358     | 1   | 0 | 0 | 0.583994 | FALSE | 0 | URB2       | 0        | 0        |
| 1358     | 1   | 0 | 0 | 0.583994 | FALSE | 0 | URI1       | 0        | 0        |
| 1358     | 1   | 0 | 0 | 0.583994 | FALSE | 0 | USH2A      | 0        | 0        |
| 1358     | 1   | 0 | 0 | 0.583994 | FALSE | 0 | USP25      | 0        | 0        |
| 1358     | 1   | 0 | 0 | 0.583994 | FALSE | 0 | USP47      | 0        | 0        |
| 1358     | 1   | 0 | 0 | 0.583994 | FALSE | 0 | USP7       | 0        | 0        |
| 1358     | 1   | 0 | 0 | 0.583994 | FALSE | 0 | VHL        | 0        | 0        |
| 1358     | 1   | 0 | 0 | 0.583994 | FALSE | 0 | WAPAL      | 0        | 0        |
| 1358     | 1   | 0 | 0 | 0.583994 | FALSE | 0 | WNT7A      | 0        | 0        |
| 1358     | 1   | 0 | 0 | 0.583994 | FALSE | 0 | XPO7       | 0        | 0        |
| 1358     | 1   | 0 | 0 | 0.583994 | FALSE | 0 | XRCC5      | 0        | 0        |
| 1358     | 1   | 0 | 0 | 0.583994 | FALSE | 0 | YAP1       | 0        | 0        |
| 1358     | 1   | 0 | 0 | 0.583994 | FALSE | 0 | ZBTB1      | 0        | 0        |
| 1358     | 1   | 0 | 0 | 0.583994 | FALSE | 0 | ZBTB21     | 0        | 0        |
| 1358     | 1   | 0 | 0 | 0.583994 | FALSE | 0 | ZBTB43     | 0        | 0        |
| 1358     | 1   | 0 | 0 | 0.583994 | FALSE | 0 | ZBTB5      | 0        | 0        |
| 1358     | 1   | 0 | 0 | 0.583994 | FALSE | 0 | ZC3H4      | 0        | 0        |
| 1358     | 1   | 0 | 0 | 0.583994 | FALSE | 0 | ZDHHC4     | 0        | 0        |
| 1358     | 1   | 0 | 0 | 0.583994 | FALSE | 0 | ZFHX4      | 0        | 0        |
| 1358     | 1   | 0 | 0 | 0.583994 | FALSE | 0 | ZFP41      | 0        | 0        |
| 1358     | 1   | 0 | 0 | 0.583994 | FALSE | 0 | ZFP64      | 0        | 0        |
| 1358     | 1   | 0 | 0 | 0.583994 | FALSE | 0 | ZFP82      | 0        | 0        |
| 1358     | 1   | 0 | 0 | 0.583994 | FALSE | 0 | ZFX        | 0        | 0        |
| 1358     | 1   | 0 | 0 | 0.583994 | FALSE | 0 | ZFYVE21    | 0        | 0        |
| 1358     | 1   | 0 | 0 | 0.583994 | FALSE | 0 | ZKSCAN8    | 0        | 0        |
| 1358     | 1   | 0 | 0 | 0.583994 | FALSE | 0 | ZNF124     | 0        | 0        |
| 1358     | 1   | 0 | 0 | 0.583994 | FALSE | 0 | ZNF143     | 0        | 0        |
| 1358     | 1   | 0 | 0 | 0.583994 | FALSE | 0 | ZNF207     | 0        | 0        |
| 1358     | 1   | 0 | 0 | 0.583994 | FALSE | 0 | ZNF223     | 0        | 0        |
| 1358     | 1   | 0 | 0 | 0.583994 | FALSE | 0 | ZNF283     | 0        | 0        |
| 1358     | 1   | 0 | 0 | 0.583994 | FALSE | 0 | ZNF284     | 0        | 0        |
| 1358     | 1   | 0 | 0 | 0.583994 | FALSE | 0 | ZNF350     | 0        | 0        |
| 1358     | 1   | 0 | 0 | 0.583994 | FALSE | 0 | ZNF480     | 0        | 0        |
| 1358     | 1   | 0 | 0 | 0.583994 | FALSE | 0 | ZNF507     | 0        | 0        |

|      |   |   |   |          |       |   |           |   |   |
|------|---|---|---|----------|-------|---|-----------|---|---|
| 1358 | 1 | 0 | 0 | 0.583994 | FALSE | 0 | ZNF512B   | 0 | 0 |
| 1358 | 1 | 0 | 0 | 0.583994 | FALSE | 0 | ZNF561-AS | 0 | 0 |
| 1358 | 1 | 0 | 0 | 0.583994 | FALSE | 0 | ZNF585A   | 0 | 0 |
| 1358 | 1 | 0 | 0 | 0.583994 | FALSE | 0 | ZNF645    | 0 | 0 |
| 1358 | 1 | 0 | 0 | 0.583994 | FALSE | 0 | ZNF649    | 0 | 0 |
| 1358 | 1 | 0 | 0 | 0.583994 | FALSE | 0 | ZNF664    | 0 | 0 |
| 1358 | 1 | 0 | 0 | 0.583994 | FALSE | 0 | ZNF675    | 0 | 0 |
| 1358 | 1 | 0 | 0 | 0.583994 | FALSE | 0 | ZNF687    | 0 | 0 |
| 1358 | 1 | 0 | 0 | 0.583994 | FALSE | 0 | ZNF714    | 0 | 0 |
| 1358 | 1 | 0 | 0 | 0.583994 | FALSE | 0 | ZNF740    | 0 | 0 |
| 1358 | 1 | 0 | 0 | 0.583994 | FALSE | 0 | ZNF746    | 0 | 0 |
| 1358 | 1 | 0 | 0 | 0.583994 | FALSE | 0 | ZNF778    | 0 | 0 |
| 1358 | 1 | 0 | 0 | 0.583994 | FALSE | 0 | ZNF792    | 0 | 0 |
| 1358 | 1 | 0 | 0 | 0.583994 | FALSE | 0 | ZNF850    | 0 | 0 |
| 1358 | 1 | 0 | 0 | 0.583994 | FALSE | 0 | ZNRF2     | 0 | 0 |
| 1358 | 1 | 0 | 0 | 0.583994 | FALSE | 0 | ZSCAN9    | 0 | 0 |
| 516  | 1 | 0 | 0 | 0.532258 | FALSE | 0 | A1BG      | 0 | 0 |
| 516  | 1 | 0 | 0 | 0.532258 | FALSE | 0 | ABCF3     | 0 | 0 |
| 516  | 1 | 0 | 0 | 0.532258 | FALSE | 0 | ACACB     | 0 | 0 |
| 516  | 1 | 0 | 0 | 0.532258 | FALSE | 0 | AFF3      | 0 | 0 |
| 516  | 1 | 0 | 0 | 0.532258 | FALSE | 0 | AHSA2     | 0 | 0 |
| 516  | 1 | 0 | 0 | 0.532258 | FALSE | 0 | ALDH1B1   | 0 | 0 |
| 516  | 1 | 0 | 0 | 0.532258 | FALSE | 0 | ALDH5A1   | 0 | 0 |
| 516  | 1 | 0 | 0 | 0.532258 | FALSE | 0 | AMER3     | 0 | 0 |
| 516  | 1 | 0 | 0 | 0.532258 | FALSE | 0 | ANGPT4    | 0 | 0 |
| 516  | 1 | 0 | 0 | 0.532258 | FALSE | 0 | APOC3     | 0 | 0 |
| 516  | 1 | 0 | 0 | 0.532258 | FALSE | 0 | AQP6      | 0 | 0 |
| 516  | 1 | 0 | 0 | 0.532258 | FALSE | 0 | ARFIP2    | 0 | 0 |
| 516  | 1 | 0 | 0 | 0.532258 | FALSE | 0 | ATAT1     | 0 | 0 |
| 516  | 1 | 0 | 0 | 0.532258 | FALSE | 0 | ATG2A     | 0 | 0 |
| 516  | 1 | 0 | 0 | 0.532258 | FALSE | 0 | ATP13A4   | 0 | 0 |
| 516  | 1 | 0 | 0 | 0.532258 | FALSE | 0 | ATP8B3    | 0 | 0 |
| 516  | 1 | 0 | 0 | 0.532258 | FALSE | 0 | ATXN2     | 0 | 0 |
| 516  | 1 | 0 | 0 | 0.532258 | FALSE | 0 | AVPR1A    | 0 | 0 |
| 516  | 1 | 0 | 0 | 0.532258 | FALSE | 0 | BASP1     | 0 | 0 |
| 516  | 1 | 0 | 0 | 0.532258 | FALSE | 0 | BBS5      | 0 | 0 |
| 516  | 1 | 0 | 0 | 0.532258 | FALSE | 0 | BTLA      | 0 | 0 |
| 516  | 1 | 0 | 0 | 0.532258 | FALSE | 0 | C17orf75  | 0 | 0 |
| 516  | 1 | 0 | 0 | 0.532258 | FALSE | 0 | C2orf49   | 0 | 0 |
| 516  | 1 | 0 | 0 | 0.532258 | FALSE | 0 | C5AR2     | 0 | 0 |
| 516  | 1 | 0 | 0 | 0.532258 | FALSE | 0 | C6orf141  | 0 | 0 |
| 516  | 1 | 0 | 0 | 0.532258 | FALSE | 0 | CA5B      | 0 | 0 |
| 516  | 1 | 0 | 0 | 0.532258 | FALSE | 0 | CA6       | 0 | 0 |
| 516  | 1 | 0 | 0 | 0.532258 | FALSE | 0 | CAD       | 0 | 0 |
| 516  | 1 | 0 | 0 | 0.532258 | FALSE | 0 | CALCOCO2  | 0 | 0 |
| 516  | 1 | 0 | 0 | 0.532258 | FALSE | 0 | CAMK2G    | 0 | 0 |
| 516  | 1 | 0 | 0 | 0.532258 | FALSE | 0 | CAMK4     | 0 | 0 |

|     |   |   |   |          |       |   |          |   |   |
|-----|---|---|---|----------|-------|---|----------|---|---|
| 516 | 1 | 0 | 0 | 0.532258 | FALSE | 0 | CASS4    | 0 | 0 |
| 516 | 1 | 0 | 0 | 0.532258 | FALSE | 0 | CASTOR2  | 0 | 0 |
| 516 | 1 | 0 | 0 | 0.532258 | FALSE | 0 | CCDC141  | 0 | 0 |
| 516 | 1 | 0 | 0 | 0.532258 | FALSE | 0 | CCDC8    | 0 | 0 |
| 516 | 1 | 0 | 0 | 0.532258 | FALSE | 0 | CCT4     | 0 | 0 |
| 516 | 1 | 0 | 0 | 0.532258 | FALSE | 0 | CD96     | 0 | 0 |
| 516 | 1 | 0 | 0 | 0.532258 | FALSE | 0 | CDKL2    | 0 | 0 |
| 516 | 1 | 0 | 0 | 0.532258 | FALSE | 0 | CDNF     | 0 | 0 |
| 516 | 1 | 0 | 0 | 0.532258 | FALSE | 0 | CHAF1B   | 0 | 0 |
| 516 | 1 | 0 | 0 | 0.532258 | FALSE | 0 | CHP1     | 0 | 0 |
| 516 | 1 | 0 | 0 | 0.532258 | FALSE | 0 | CHST4    | 0 | 0 |
| 516 | 1 | 0 | 0 | 0.532258 | FALSE | 0 | CHST6    | 0 | 0 |
| 516 | 1 | 0 | 0 | 0.532258 | FALSE | 0 | CLPX     | 0 | 0 |
| 516 | 1 | 0 | 0 | 0.532258 | FALSE | 0 | CNKSR3   | 0 | 0 |
| 516 | 1 | 0 | 0 | 0.532258 | FALSE | 0 | COL4A3BP | 0 | 0 |
| 516 | 1 | 0 | 0 | 0.532258 | FALSE | 0 | COL9A2   | 0 | 0 |
| 516 | 1 | 0 | 0 | 0.532258 | FALSE | 0 | COLCA1   | 0 | 0 |
| 516 | 1 | 0 | 0 | 0.532258 | FALSE | 0 | CRISPLD2 | 0 | 0 |
| 516 | 1 | 0 | 0 | 0.532258 | FALSE | 0 | CRKL     | 0 | 0 |
| 516 | 1 | 0 | 0 | 0.532258 | FALSE | 0 | CRP      | 0 | 0 |
| 516 | 1 | 0 | 0 | 0.532258 | FALSE | 0 | CXorf38  | 0 | 0 |
| 516 | 1 | 0 | 0 | 0.532258 | FALSE | 0 | CYP1A2   | 0 | 0 |
| 516 | 1 | 0 | 0 | 0.532258 | FALSE | 0 | CYP4F3   | 0 | 0 |
| 516 | 1 | 0 | 0 | 0.532258 | FALSE | 0 | DCPS     | 0 | 0 |
| 516 | 1 | 0 | 0 | 0.532258 | FALSE | 0 | DDX52    | 0 | 0 |
| 516 | 1 | 0 | 0 | 0.532258 | FALSE | 0 | DEFB105A | 0 | 0 |
| 516 | 1 | 0 | 0 | 0.532258 | FALSE | 0 | DEFB105B | 0 | 0 |
| 516 | 1 | 0 | 0 | 0.532258 | FALSE | 0 | DMKN     | 0 | 0 |
| 516 | 1 | 0 | 0 | 0.532258 | FALSE | 0 | DMRT2    | 0 | 0 |
| 516 | 1 | 0 | 0 | 0.532258 | FALSE | 0 | DMTF1    | 0 | 0 |
| 516 | 1 | 0 | 0 | 0.532258 | FALSE | 0 | DNA2     | 0 | 0 |
| 516 | 1 | 0 | 0 | 0.532258 | FALSE | 0 | DNAJC16  | 0 | 0 |
| 516 | 1 | 0 | 0 | 0.532258 | FALSE | 0 | DOCK7    | 0 | 0 |
| 516 | 1 | 0 | 0 | 0.532258 | FALSE | 0 | DTX3L    | 0 | 0 |
| 516 | 1 | 0 | 0 | 0.532258 | FALSE | 0 | EEF2K    | 0 | 0 |
| 516 | 1 | 0 | 0 | 0.532258 | FALSE | 0 | EIF5A2   | 0 | 0 |
| 516 | 1 | 0 | 0 | 0.532258 | FALSE | 0 | EMC1     | 0 | 0 |
| 516 | 1 | 0 | 0 | 0.532258 | FALSE | 0 | F2RL3    | 0 | 0 |
| 516 | 1 | 0 | 0 | 0.532258 | FALSE | 0 | FAHD1    | 0 | 0 |
| 516 | 1 | 0 | 0 | 0.532258 | FALSE | 0 | FAM163A  | 0 | 0 |
| 516 | 1 | 0 | 0 | 0.532258 | FALSE | 0 | FAM234B  | 0 | 0 |
| 516 | 1 | 0 | 0 | 0.532258 | FALSE | 0 | FAM27E2  | 0 | 0 |
| 516 | 1 | 0 | 0 | 0.532258 | FALSE | 0 | FBXL20   | 0 | 0 |
| 516 | 1 | 0 | 0 | 0.532258 | FALSE | 0 | FBXO47   | 0 | 0 |
| 516 | 1 | 0 | 0 | 0.532258 | FALSE | 0 | FCRL2    | 0 | 0 |
| 516 | 1 | 0 | 0 | 0.532258 | FALSE | 0 | FFAR4    | 0 | 0 |
| 516 | 1 | 0 | 0 | 0.532258 | FALSE | 0 | FHL2     | 0 | 0 |

|     |   |   |   |          |       |             |   |   |
|-----|---|---|---|----------|-------|-------------|---|---|
| 516 | 1 | 0 | 0 | 0.532258 | FALSE | 0 FOPNL     | 0 | 0 |
| 516 | 1 | 0 | 0 | 0.532258 | FALSE | 0 FOXL2NB   | 0 | 0 |
| 516 | 1 | 0 | 0 | 0.532258 | FALSE | 0 FRMD8     | 0 | 0 |
| 516 | 1 | 0 | 0 | 0.532258 | FALSE | 0 FUT1      | 0 | 0 |
| 516 | 1 | 0 | 0 | 0.532258 | FALSE | 0 FUT9      | 0 | 0 |
| 516 | 1 | 0 | 0 | 0.532258 | FALSE | 0 GABPB1    | 0 | 0 |
| 516 | 1 | 0 | 0 | 0.532258 | FALSE | 0 GINM1     | 0 | 0 |
| 516 | 1 | 0 | 0 | 0.532258 | FALSE | 0 GMPR      | 0 | 0 |
| 516 | 1 | 0 | 0 | 0.532258 | FALSE | 0 GON7      | 0 | 0 |
| 516 | 1 | 0 | 0 | 0.532258 | FALSE | 0 GOSR1     | 0 | 0 |
| 516 | 1 | 0 | 0 | 0.532258 | FALSE | 0 GPR75     | 0 | 0 |
| 516 | 1 | 0 | 0 | 0.532258 | FALSE | 0 HACE1     | 0 | 0 |
| 516 | 1 | 0 | 0 | 0.532258 | FALSE | 0 HCAR1     | 0 | 0 |
| 516 | 1 | 0 | 0 | 0.532258 | FALSE | 0 HEPHL1    | 0 | 0 |
| 516 | 1 | 0 | 0 | 0.532258 | FALSE | 0 HINFP     | 0 | 0 |
| 516 | 1 | 0 | 0 | 0.532258 | FALSE | 0 HIST1H2BN | 0 | 0 |
| 516 | 1 | 0 | 0 | 0.532258 | FALSE | 0 HMX3      | 0 | 0 |
| 516 | 1 | 0 | 0 | 0.532258 | FALSE | 0 HSBP1     | 0 | 0 |
| 516 | 1 | 0 | 0 | 0.532258 | FALSE | 0 HTR5A-AS1 | 0 | 0 |
| 516 | 1 | 0 | 0 | 0.532258 | FALSE | 0 IMP4      | 0 | 0 |
| 516 | 1 | 0 | 0 | 0.532258 | FALSE | 0 IMPACT    | 0 | 0 |
| 516 | 1 | 0 | 0 | 0.532258 | FALSE | 0 IPP       | 0 | 0 |
| 516 | 1 | 0 | 0 | 0.532258 | FALSE | 0 IRAK1BP1  | 0 | 0 |
| 516 | 1 | 0 | 0 | 0.532258 | FALSE | 0 JAK3      | 0 | 0 |
| 516 | 1 | 0 | 0 | 0.532258 | FALSE | 0 KANSL3    | 0 | 0 |
| 516 | 1 | 0 | 0 | 0.532258 | FALSE | 0 KCNN3     | 0 | 0 |
| 516 | 1 | 0 | 0 | 0.532258 | FALSE | 0 KIAA1210  | 0 | 0 |
| 516 | 1 | 0 | 0 | 0.532258 | FALSE | 0 KLHDC8A   | 0 | 0 |
| 516 | 1 | 0 | 0 | 0.532258 | FALSE | 0 KLLN      | 0 | 0 |
| 516 | 1 | 0 | 0 | 0.532258 | FALSE | 0 KNSTRN    | 0 | 0 |
| 516 | 1 | 0 | 0 | 0.532258 | FALSE | 0 KRTAP21-2 | 0 | 0 |
| 516 | 1 | 0 | 0 | 0.532258 | FALSE | 0 LAIR1     | 0 | 0 |
| 516 | 1 | 0 | 0 | 0.532258 | FALSE | 0 LAMC3     | 0 | 0 |
| 516 | 1 | 0 | 0 | 0.532258 | FALSE | 0 LETM1     | 0 | 0 |
| 516 | 1 | 0 | 0 | 0.532258 | FALSE | 0 LHPP      | 0 | 0 |
| 516 | 1 | 0 | 0 | 0.532258 | FALSE | 0 LIPH      | 0 | 0 |
| 516 | 1 | 0 | 0 | 0.532258 | FALSE | 0 LRRD1     | 0 | 0 |
| 516 | 1 | 0 | 0 | 0.532258 | FALSE | 0 LRTOMT    | 0 | 0 |
| 516 | 1 | 0 | 0 | 0.532258 | FALSE | 0 LTA       | 0 | 0 |
| 516 | 1 | 0 | 0 | 0.532258 | FALSE | 0 LYZ       | 0 | 0 |
| 516 | 1 | 0 | 0 | 0.532258 | FALSE | 0 MAGI3     | 0 | 0 |
| 516 | 1 | 0 | 0 | 0.532258 | FALSE | 0 ME2       | 0 | 0 |
| 516 | 1 | 0 | 0 | 0.532258 | FALSE | 0 MED18     | 0 | 0 |
| 516 | 1 | 0 | 0 | 0.532258 | FALSE | 0 MED29     | 0 | 0 |
| 516 | 1 | 0 | 0 | 0.532258 | FALSE | 0 MEIOC     | 0 | 0 |
| 516 | 1 | 0 | 0 | 0.532258 | FALSE | 0 MELK      | 0 | 0 |
| 516 | 1 | 0 | 0 | 0.532258 | FALSE | 0 METTL8    | 0 | 0 |

|     |   |   |   |          |       |   |          |   |   |
|-----|---|---|---|----------|-------|---|----------|---|---|
| 516 | 1 | 0 | 0 | 0.532258 | FALSE | 0 | MEX3A    | 0 | 0 |
| 516 | 1 | 0 | 0 | 0.532258 | FALSE | 0 | MFSD14C  | 0 | 0 |
| 516 | 1 | 0 | 0 | 0.532258 | FALSE | 0 | MINDY2   | 0 | 0 |
| 516 | 1 | 0 | 0 | 0.532258 | FALSE | 0 | MRI1     | 0 | 0 |
| 516 | 1 | 0 | 0 | 0.532258 | FALSE | 0 | MRM3     | 0 | 0 |
| 516 | 1 | 0 | 0 | 0.532258 | FALSE | 0 | MSX2     | 0 | 0 |
| 516 | 1 | 0 | 0 | 0.532258 | FALSE | 0 | MTHFD1L  | 0 | 0 |
| 516 | 1 | 0 | 0 | 0.532258 | FALSE | 0 | MUC21    | 0 | 0 |
| 516 | 1 | 0 | 0 | 0.532258 | FALSE | 0 | MYDGF    | 0 | 0 |
| 516 | 1 | 0 | 0 | 0.532258 | FALSE | 0 | MYLK3    | 0 | 0 |
| 516 | 1 | 0 | 0 | 0.532258 | FALSE | 0 | NDUFC2   | 0 | 0 |
| 516 | 1 | 0 | 0 | 0.532258 | FALSE | 0 | NEK8     | 0 | 0 |
| 516 | 1 | 0 | 0 | 0.532258 | FALSE | 0 | NIPAL1   | 0 | 0 |
| 516 | 1 | 0 | 0 | 0.532258 | FALSE | 0 | NLRP9    | 0 | 0 |
| 516 | 1 | 0 | 0 | 0.532258 | FALSE | 0 | NME1-NMI | 0 | 0 |
| 516 | 1 | 0 | 0 | 0.532258 | FALSE | 0 | NOS1AP   | 0 | 0 |
| 516 | 1 | 0 | 0 | 0.532258 | FALSE | 0 | NOX5     | 0 | 0 |
| 516 | 1 | 0 | 0 | 0.532258 | FALSE | 0 | NPAS1    | 0 | 0 |
| 516 | 1 | 0 | 0 | 0.532258 | FALSE | 0 | NRXN3    | 0 | 0 |
| 516 | 1 | 0 | 0 | 0.532258 | FALSE | 0 | NUDT16   | 0 | 0 |
| 516 | 1 | 0 | 0 | 0.532258 | FALSE | 0 | NUP93    | 0 | 0 |
| 516 | 1 | 0 | 0 | 0.532258 | FALSE | 0 | OCIAD1   | 0 | 0 |
| 516 | 1 | 0 | 0 | 0.532258 | FALSE | 0 | OCIAD2   | 0 | 0 |
| 516 | 1 | 0 | 0 | 0.532258 | FALSE | 0 | OR51E2   | 0 | 0 |
| 516 | 1 | 0 | 0 | 0.532258 | FALSE | 0 | ORC6     | 0 | 0 |
| 516 | 1 | 0 | 0 | 0.532258 | FALSE | 0 | PCLAF    | 0 | 0 |
| 516 | 1 | 0 | 0 | 0.532258 | FALSE | 0 | PDE12    | 0 | 0 |
| 516 | 1 | 0 | 0 | 0.532258 | FALSE | 0 | PDK3     | 0 | 0 |
| 516 | 1 | 0 | 0 | 0.532258 | FALSE | 0 | PGM3     | 0 | 0 |
| 516 | 1 | 0 | 0 | 0.532258 | FALSE | 0 | PLEKHG2  | 0 | 0 |
| 516 | 1 | 0 | 0 | 0.532258 | FALSE | 0 | PLLP     | 0 | 0 |
| 516 | 1 | 0 | 0 | 0.532258 | FALSE | 0 | PLPP4    | 0 | 0 |
| 516 | 1 | 0 | 0 | 0.532258 | FALSE | 0 | PNMA8B   | 0 | 0 |
| 516 | 1 | 0 | 0 | 0.532258 | FALSE | 0 | POFUT2   | 0 | 0 |
| 516 | 1 | 0 | 0 | 0.532258 | FALSE | 0 | POLR1A   | 0 | 0 |
| 516 | 1 | 0 | 0 | 0.532258 | FALSE | 0 | PON1     | 0 | 0 |
| 516 | 1 | 0 | 0 | 0.532258 | FALSE | 0 | POU2F3   | 0 | 0 |
| 516 | 1 | 0 | 0 | 0.532258 | FALSE | 0 | PPIL6    | 0 | 0 |
| 516 | 1 | 0 | 0 | 0.532258 | FALSE | 0 | PPM1K    | 0 | 0 |
| 516 | 1 | 0 | 0 | 0.532258 | FALSE | 0 | PRND     | 0 | 0 |
| 516 | 1 | 0 | 0 | 0.532258 | FALSE | 0 | PRPF4    | 0 | 0 |
| 516 | 1 | 0 | 0 | 0.532258 | FALSE | 0 | PRR12    | 0 | 0 |
| 516 | 1 | 0 | 0 | 0.532258 | FALSE | 0 | PSMD9    | 0 | 0 |
| 516 | 1 | 0 | 0 | 0.532258 | FALSE | 0 | PSMG4    | 0 | 0 |
| 516 | 1 | 0 | 0 | 0.532258 | FALSE | 0 | PTCHD3   | 0 | 0 |
| 516 | 1 | 0 | 0 | 0.532258 | FALSE | 0 | PTK6     | 0 | 0 |
| 516 | 1 | 0 | 0 | 0.532258 | FALSE | 0 | PXMP4    | 0 | 0 |

|     |   |   |   |          |       |   |           |   |   |
|-----|---|---|---|----------|-------|---|-----------|---|---|
| 516 | 1 | 0 | 0 | 0.532258 | FALSE | 0 | QPCT      | 0 | 0 |
| 516 | 1 | 0 | 0 | 0.532258 | FALSE | 0 | QPCTL     | 0 | 0 |
| 516 | 1 | 0 | 0 | 0.532258 | FALSE | 0 | RAB11B    | 0 | 0 |
| 516 | 1 | 0 | 0 | 0.532258 | FALSE | 0 | RAD51L3-R | 0 | 0 |
| 516 | 1 | 0 | 0 | 0.532258 | FALSE | 0 | REPS1     | 0 | 0 |
| 516 | 1 | 0 | 0 | 0.532258 | FALSE | 0 | RFFL      | 0 | 0 |
| 516 | 1 | 0 | 0 | 0.532258 | FALSE | 0 | RHNO1     | 0 | 0 |
| 516 | 1 | 0 | 0 | 0.532258 | FALSE | 0 | RILPL1    | 0 | 0 |
| 516 | 1 | 0 | 0 | 0.532258 | FALSE | 0 | RNASEH2B  | 0 | 0 |
| 516 | 1 | 0 | 0 | 0.532258 | FALSE | 0 | RNF115    | 0 | 0 |
| 516 | 1 | 0 | 0 | 0.532258 | FALSE | 0 | RPL12     | 0 | 0 |
| 516 | 1 | 0 | 0 | 0.532258 | FALSE | 0 | RPRD2     | 0 | 0 |
| 516 | 1 | 0 | 0 | 0.532258 | FALSE | 0 | RPTN      | 0 | 0 |
| 516 | 1 | 0 | 0 | 0.532258 | FALSE | 0 | RSRC1     | 0 | 0 |
| 516 | 1 | 0 | 0 | 0.532258 | FALSE | 0 | SC5D      | 0 | 0 |
| 516 | 1 | 0 | 0 | 0.532258 | FALSE | 0 | SDHAF1    | 0 | 0 |
| 516 | 1 | 0 | 0 | 0.532258 | FALSE | 0 | SERPING1  | 0 | 0 |
| 516 | 1 | 0 | 0 | 0.532258 | FALSE | 0 | SIAE      | 0 | 0 |
| 516 | 1 | 0 | 0 | 0.532258 | FALSE | 0 | SLC16A4   | 0 | 0 |
| 516 | 1 | 0 | 0 | 0.532258 | FALSE | 0 | SLC24A4   | 0 | 0 |
| 516 | 1 | 0 | 0 | 0.532258 | FALSE | 0 | SLC25A15  | 0 | 0 |
| 516 | 1 | 0 | 0 | 0.532258 | FALSE | 0 | SLC35E2   | 0 | 0 |
| 516 | 1 | 0 | 0 | 0.532258 | FALSE | 0 | SLC9A7    | 0 | 0 |
| 516 | 1 | 0 | 0 | 0.532258 | FALSE | 0 | SLFN12L   | 0 | 0 |
| 516 | 1 | 0 | 0 | 0.532258 | FALSE | 0 | SMCR8     | 0 | 0 |
| 516 | 1 | 0 | 0 | 0.532258 | FALSE | 0 | SMTNL2    | 0 | 0 |
| 516 | 1 | 0 | 0 | 0.532258 | FALSE | 0 | SNRNP48   | 0 | 0 |
| 516 | 1 | 0 | 0 | 0.532258 | FALSE | 0 | SRCIN1    | 0 | 0 |
| 516 | 1 | 0 | 0 | 0.532258 | FALSE | 0 | SRRD      | 0 | 0 |
| 516 | 1 | 0 | 0 | 0.532258 | FALSE | 0 | SRSF7     | 0 | 0 |
| 516 | 1 | 0 | 0 | 0.532258 | FALSE | 0 | SSH3      | 0 | 0 |
| 516 | 1 | 0 | 0 | 0.532258 | FALSE | 0 | SSTR2     | 0 | 0 |
| 516 | 1 | 0 | 0 | 0.532258 | FALSE | 0 | STK32A    | 0 | 0 |
| 516 | 1 | 0 | 0 | 0.532258 | FALSE | 0 | STX4      | 0 | 0 |
| 516 | 1 | 0 | 0 | 0.532258 | FALSE | 0 | SURF6     | 0 | 0 |
| 516 | 1 | 0 | 0 | 0.532258 | FALSE | 0 | SUSD5     | 0 | 0 |
| 516 | 1 | 0 | 0 | 0.532258 | FALSE | 0 | SVOP      | 0 | 0 |
| 516 | 1 | 0 | 0 | 0.532258 | FALSE | 0 | SYNJ2BP   | 0 | 0 |
| 516 | 1 | 0 | 0 | 0.532258 | FALSE | 0 | TACO1     | 0 | 0 |
| 516 | 1 | 0 | 0 | 0.532258 | FALSE | 0 | TACR2     | 0 | 0 |
| 516 | 1 | 0 | 0 | 0.532258 | FALSE | 0 | TAF11     | 0 | 0 |
| 516 | 1 | 0 | 0 | 0.532258 | FALSE | 0 | TERF2     | 0 | 0 |
| 516 | 1 | 0 | 0 | 0.532258 | FALSE | 0 | THOC2     | 0 | 0 |
| 516 | 1 | 0 | 0 | 0.532258 | FALSE | 0 | THOC5     | 0 | 0 |
| 516 | 1 | 0 | 0 | 0.532258 | FALSE | 0 | TIMM10B   | 0 | 0 |
| 516 | 1 | 0 | 0 | 0.532258 | FALSE | 0 | TIMM29    | 0 | 0 |
| 516 | 1 | 0 | 0 | 0.532258 | FALSE | 0 | TMED4     | 0 | 0 |



|     |   |   |   |          |       |   |           |   |   |
|-----|---|---|---|----------|-------|---|-----------|---|---|
| 516 | 1 | 0 | 0 | 0.532258 | FALSE | 0 | TMEM145   | 0 | 0 |
| 516 | 1 | 0 | 0 | 0.532258 | FALSE | 0 | TMEM151I  | 0 | 0 |
| 516 | 1 | 0 | 0 | 0.532258 | FALSE | 0 | TMEM184C  | 0 | 0 |
| 516 | 1 | 0 | 0 | 0.532258 | FALSE | 0 | TMEM239   | 0 | 0 |
| 516 | 1 | 0 | 0 | 0.532258 | FALSE | 0 | TNFRSF13E | 0 | 0 |
| 516 | 1 | 0 | 0 | 0.532258 | FALSE | 0 | TPGS1     | 0 | 0 |
| 516 | 1 | 0 | 0 | 0.532258 | FALSE | 0 | TRAF3IP1  | 0 | 0 |
| 516 | 1 | 0 | 0 | 0.532258 | FALSE | 0 | TRAFD1    | 0 | 0 |
| 516 | 1 | 0 | 0 | 0.532258 | FALSE | 0 | TRIM16L   | 0 | 0 |
| 516 | 1 | 0 | 0 | 0.532258 | FALSE | 0 | TRIM45    | 0 | 0 |
| 516 | 1 | 0 | 0 | 0.532258 | FALSE | 0 | TRIM58    | 0 | 0 |
| 516 | 1 | 0 | 0 | 0.532258 | FALSE | 0 | TRIM68    | 0 | 0 |
| 516 | 1 | 0 | 0 | 0.532258 | FALSE | 0 | TRNP1     | 0 | 0 |
| 516 | 1 | 0 | 0 | 0.532258 | FALSE | 0 | TRPC5     | 0 | 0 |
| 516 | 1 | 0 | 0 | 0.532258 | FALSE | 0 | TRPV1     | 0 | 0 |
| 516 | 1 | 0 | 0 | 0.532258 | FALSE | 0 | TSPEAR-AS | 0 | 0 |
| 516 | 1 | 0 | 0 | 0.532258 | FALSE | 0 | TTC39A    | 0 | 0 |
| 516 | 1 | 0 | 0 | 0.532258 | FALSE | 0 | TTC39C    | 0 | 0 |
| 516 | 1 | 0 | 0 | 0.532258 | FALSE | 0 | TUFT1     | 0 | 0 |
| 516 | 1 | 0 | 0 | 0.532258 | FALSE | 0 | UBC       | 0 | 0 |
| 516 | 1 | 0 | 0 | 0.532258 | FALSE | 0 | UBXN11    | 0 | 0 |
| 516 | 1 | 0 | 0 | 0.532258 | FALSE | 0 | UGDH      | 0 | 0 |
| 516 | 1 | 0 | 0 | 0.532258 | FALSE | 0 | UGGT1     | 0 | 0 |
| 516 | 1 | 0 | 0 | 0.532258 | FALSE | 0 | UQCR11    | 0 | 0 |
| 516 | 1 | 0 | 0 | 0.532258 | FALSE | 0 | UTP4      | 0 | 0 |
| 516 | 1 | 0 | 0 | 0.532258 | FALSE | 0 | UTP6      | 0 | 0 |
| 516 | 1 | 0 | 0 | 0.532258 | FALSE | 0 | VPS4A     | 0 | 0 |
| 516 | 1 | 0 | 0 | 0.532258 | FALSE | 0 | VWA7      | 0 | 0 |
| 516 | 1 | 0 | 0 | 0.532258 | FALSE | 0 | WT1       | 0 | 0 |
| 516 | 1 | 0 | 0 | 0.532258 | FALSE | 0 | YIPF4     | 0 | 0 |
| 516 | 1 | 0 | 0 | 0.532258 | FALSE | 0 | ZC3H12B   | 0 | 0 |
| 516 | 1 | 0 | 0 | 0.532258 | FALSE | 0 | ZC3H7B    | 0 | 0 |
| 516 | 1 | 0 | 0 | 0.532258 | FALSE | 0 | ZFAND2B   | 0 | 0 |
| 516 | 1 | 0 | 0 | 0.532258 | FALSE | 0 | ZFP69B    | 0 | 0 |
| 516 | 1 | 0 | 0 | 0.532258 | FALSE | 0 | ZNF101    | 0 | 0 |
| 516 | 1 | 0 | 0 | 0.532258 | FALSE | 0 | ZNF221    | 0 | 0 |
| 516 | 1 | 0 | 0 | 0.532258 | FALSE | 0 | ZNF234    | 0 | 0 |
| 516 | 1 | 0 | 0 | 0.532258 | FALSE | 0 | ZNF275    | 0 | 0 |
| 516 | 1 | 0 | 0 | 0.532258 | FALSE | 0 | ZNF286A   | 0 | 0 |
| 516 | 1 | 0 | 0 | 0.532258 | FALSE | 0 | ZNF286B   | 0 | 0 |
| 516 | 1 | 0 | 0 | 0.532258 | FALSE | 0 | ZNF383    | 0 | 0 |
| 516 | 1 | 0 | 0 | 0.532258 | FALSE | 0 | ZNF419    | 0 | 0 |
| 516 | 1 | 0 | 0 | 0.532258 | FALSE | 0 | ZNF555    | 0 | 0 |
| 516 | 1 | 0 | 0 | 0.532258 | FALSE | 0 | ZNF557    | 0 | 0 |
| 516 | 1 | 0 | 0 | 0.532258 | FALSE | 0 | ZNF610    | 0 | 0 |
| 516 | 1 | 0 | 0 | 0.532258 | FALSE | 0 | ZNF641    | 0 | 0 |
| 516 | 1 | 0 | 0 | 0.532258 | FALSE | 0 | ZNF695    | 0 | 0 |

|     |   |   |   |          |       |   |          |   |   |
|-----|---|---|---|----------|-------|---|----------|---|---|
| 516 | 1 | 0 | 0 | 0.532258 | FALSE | 0 | ZNF730   | 0 | 0 |
| 516 | 1 | 0 | 0 | 0.532258 | FALSE | 0 | ZNF749   | 0 | 0 |
| 516 | 1 | 0 | 0 | 0.532258 | FALSE | 0 | ZNF766   | 0 | 0 |
| 516 | 1 | 0 | 0 | 0.532258 | FALSE | 0 | ZNF835   | 0 | 0 |
| 516 | 1 | 0 | 0 | 0.532258 | FALSE | 0 | ZNF844   | 0 | 0 |
| 516 | 1 | 0 | 0 | 0.532258 | FALSE | 0 | ZYG11A   | 0 | 0 |
| 874 | 1 | 0 | 0 | 0.554255 | FALSE | 0 | AAR2     | 0 | 0 |
| 874 | 1 | 0 | 0 | 0.554255 | FALSE | 0 | ABCA2    | 0 | 0 |
| 874 | 1 | 0 | 0 | 0.554255 | FALSE | 0 | ABHD4    | 0 | 0 |
| 874 | 1 | 0 | 0 | 0.554255 | FALSE | 0 | ACOT9    | 0 | 0 |
| 874 | 1 | 0 | 0 | 0.554255 | FALSE | 0 | ADAMTS4  | 0 | 0 |
| 874 | 1 | 0 | 0 | 0.554255 | FALSE | 0 | ADH5     | 0 | 0 |
| 874 | 1 | 0 | 0 | 0.554255 | FALSE | 0 | AGAP1    | 0 | 0 |
| 874 | 1 | 0 | 0 | 0.554255 | FALSE | 0 | AGPAT1   | 0 | 0 |
| 874 | 1 | 0 | 0 | 0.554255 | FALSE | 0 | AGPAT6   | 0 | 0 |
| 874 | 1 | 0 | 0 | 0.554255 | FALSE | 0 | AHR      | 0 | 0 |
| 874 | 1 | 0 | 0 | 0.554255 | FALSE | 0 | AHRR     | 0 | 0 |
| 874 | 1 | 0 | 0 | 0.554255 | FALSE | 0 | AIRE     | 0 | 0 |
| 874 | 1 | 0 | 0 | 0.554255 | FALSE | 0 | AKR7A2   | 0 | 0 |
| 874 | 1 | 0 | 0 | 0.554255 | FALSE | 0 | ALPI     | 0 | 0 |
| 874 | 1 | 0 | 0 | 0.554255 | FALSE | 0 | AMER1    | 0 | 0 |
| 874 | 1 | 0 | 0 | 0.554255 | FALSE | 0 | AMIGO1   | 0 | 0 |
| 874 | 1 | 0 | 0 | 0.554255 | FALSE | 0 | ANKH     | 0 | 0 |
| 874 | 1 | 0 | 0 | 0.554255 | FALSE | 0 | ANKLE2   | 0 | 0 |
| 874 | 1 | 0 | 0 | 0.554255 | FALSE | 0 | ANKRD9   | 0 | 0 |
| 874 | 1 | 0 | 0 | 0.554255 | FALSE | 0 | ANKS4B   | 0 | 0 |
| 874 | 1 | 0 | 0 | 0.554255 | FALSE | 0 | ANXA11   | 0 | 0 |
| 874 | 1 | 0 | 0 | 0.554255 | FALSE | 0 | AP1M1    | 0 | 0 |
| 874 | 1 | 0 | 0 | 0.554255 | FALSE | 0 | AP5B1    | 0 | 0 |
| 874 | 1 | 0 | 0 | 0.554255 | FALSE | 0 | APPL2    | 0 | 0 |
| 874 | 1 | 0 | 0 | 0.554255 | FALSE | 0 | ARPC1B   | 0 | 0 |
| 874 | 1 | 0 | 0 | 0.554255 | FALSE | 0 | ARSD     | 0 | 0 |
| 874 | 1 | 0 | 0 | 0.554255 | FALSE | 0 | ATF3     | 0 | 0 |
| 874 | 1 | 0 | 0 | 0.554255 | FALSE | 0 | ATXN10   | 0 | 0 |
| 874 | 1 | 0 | 0 | 0.554255 | FALSE | 0 | BAG3     | 0 | 0 |
| 874 | 1 | 0 | 0 | 0.554255 | FALSE | 0 | BAP1     | 0 | 0 |
| 874 | 1 | 0 | 0 | 0.554255 | FALSE | 0 | BCCIP    | 0 | 0 |
| 874 | 1 | 0 | 0 | 0.554255 | FALSE | 0 | Bcl-2    | 0 | 0 |
| 874 | 1 | 0 | 0 | 0.554255 | FALSE | 0 | BRD2     | 0 | 0 |
| 874 | 1 | 0 | 0 | 0.554255 | FALSE | 0 | C1orf61  | 0 | 0 |
| 874 | 1 | 0 | 0 | 0.554255 | FALSE | 0 | C2orf15  | 0 | 0 |
| 874 | 1 | 0 | 0 | 0.554255 | FALSE | 0 | C5orf38  | 0 | 0 |
| 874 | 1 | 0 | 0 | 0.554255 | FALSE | 0 | C6orf106 | 0 | 0 |
| 874 | 1 | 0 | 0 | 0.554255 | FALSE | 0 | C9orf91  | 0 | 0 |
| 874 | 1 | 0 | 0 | 0.554255 | FALSE | 0 | CA2      | 0 | 0 |
| 874 | 1 | 0 | 0 | 0.554255 | FALSE | 0 | CACNA1E  | 0 | 0 |
| 874 | 1 | 0 | 0 | 0.554255 | FALSE | 0 | CALR     | 0 | 0 |

|     |   |   |   |          |       |   |           |   |   |
|-----|---|---|---|----------|-------|---|-----------|---|---|
| 874 | 1 | 0 | 0 | 0.554255 | FALSE | 0 | CAND1     | 0 | 0 |
| 874 | 1 | 0 | 0 | 0.554255 | FALSE | 0 | CARM1     | 0 | 0 |
| 874 | 1 | 0 | 0 | 0.554255 | FALSE | 0 | CASP5     | 0 | 0 |
| 874 | 1 | 0 | 0 | 0.554255 | FALSE | 0 | CAT       | 0 | 0 |
| 874 | 1 | 0 | 0 | 0.554255 | FALSE | 0 | CCDC170   | 0 | 0 |
| 874 | 1 | 0 | 0 | 0.554255 | FALSE | 0 | CCDC61    | 0 | 0 |
| 874 | 1 | 0 | 0 | 0.554255 | FALSE | 0 | CCDC93    | 0 | 0 |
| 874 | 1 | 0 | 0 | 0.554255 | FALSE | 0 | CCR5      | 0 | 0 |
| 874 | 1 | 0 | 0 | 0.554255 | FALSE | 0 | CCR6      | 0 | 0 |
| 874 | 1 | 0 | 0 | 0.554255 | FALSE | 0 | CCSER1    | 0 | 0 |
| 874 | 1 | 0 | 0 | 0.554255 | FALSE | 0 | CDC42EP3  | 0 | 0 |
| 874 | 1 | 0 | 0 | 0.554255 | FALSE | 0 | CDKN2AIP1 | 0 | 0 |
| 874 | 1 | 0 | 0 | 0.554255 | FALSE | 0 | CENPP     | 0 | 0 |
| 874 | 1 | 0 | 0 | 0.554255 | FALSE | 0 | CEP95     | 0 | 0 |
| 874 | 1 | 0 | 0 | 0.554255 | FALSE | 0 | CERS4     | 0 | 0 |
| 874 | 1 | 0 | 0 | 0.554255 | FALSE | 0 | CHD6      | 0 | 0 |
| 874 | 1 | 0 | 0 | 0.554255 | FALSE | 0 | CHST10    | 0 | 0 |
| 874 | 1 | 0 | 0 | 0.554255 | FALSE | 0 | CIPC      | 0 | 0 |
| 874 | 1 | 0 | 0 | 0.554255 | FALSE | 0 | CLEC17A   | 0 | 0 |
| 874 | 1 | 0 | 0 | 0.554255 | FALSE | 0 | CLN3      | 0 | 0 |
| 874 | 1 | 0 | 0 | 0.554255 | FALSE | 0 | CLPTM1L   | 0 | 0 |
| 874 | 1 | 0 | 0 | 0.554255 | FALSE | 0 | CMPK1     | 0 | 0 |
| 874 | 1 | 0 | 0 | 0.554255 | FALSE | 0 | CNOT10    | 0 | 0 |
| 874 | 1 | 0 | 0 | 0.554255 | FALSE | 0 | COA1      | 0 | 0 |
| 874 | 1 | 0 | 0 | 0.554255 | FALSE | 0 | COPS3     | 0 | 0 |
| 874 | 1 | 0 | 0 | 0.554255 | FALSE | 0 | CPB1      | 0 | 0 |
| 874 | 1 | 0 | 0 | 0.554255 | FALSE | 0 | CPSF7     | 0 | 0 |
| 874 | 1 | 0 | 0 | 0.554255 | FALSE | 0 | CRAMP1L   | 0 | 0 |
| 874 | 1 | 0 | 0 | 0.554255 | FALSE | 0 | CREG2     | 0 | 0 |
| 874 | 1 | 0 | 0 | 0.554255 | FALSE | 0 | CRTC2     | 0 | 0 |
| 874 | 1 | 0 | 0 | 0.554255 | FALSE | 0 | CSNK2A2   | 0 | 0 |
| 874 | 1 | 0 | 0 | 0.554255 | FALSE | 0 | CSRP1     | 0 | 0 |
| 874 | 1 | 0 | 0 | 0.554255 | FALSE | 0 | CTH       | 0 | 0 |
| 874 | 1 | 0 | 0 | 0.554255 | FALSE | 0 | CTXN1     | 0 | 0 |
| 874 | 1 | 0 | 0 | 0.554255 | FALSE | 0 | CYB5R3    | 0 | 0 |
| 874 | 1 | 0 | 0 | 0.554255 | FALSE | 0 | CYP2C9    | 0 | 0 |
| 874 | 1 | 0 | 0 | 0.554255 | FALSE | 0 | D2HGDH    | 0 | 0 |
| 874 | 1 | 0 | 0 | 0.554255 | FALSE | 0 | DAPK1     | 0 | 0 |
| 874 | 1 | 0 | 0 | 0.554255 | FALSE | 0 | DBT       | 0 | 0 |
| 874 | 1 | 0 | 0 | 0.554255 | FALSE | 0 | DCAF8     | 0 | 0 |
| 874 | 1 | 0 | 0 | 0.554255 | FALSE | 0 | DCTN6     | 0 | 0 |
| 874 | 1 | 0 | 0 | 0.554255 | FALSE | 0 | DCUN1D2   | 0 | 0 |
| 874 | 1 | 0 | 0 | 0.554255 | FALSE | 0 | DHDDS     | 0 | 0 |
| 874 | 1 | 0 | 0 | 0.554255 | FALSE | 0 | DIEXF     | 0 | 0 |
| 874 | 1 | 0 | 0 | 0.554255 | FALSE | 0 | DLG1      | 0 | 0 |
| 874 | 1 | 0 | 0 | 0.554255 | FALSE | 0 | DLGAP4    | 0 | 0 |
| 874 | 1 | 0 | 0 | 0.554255 | FALSE | 0 | DOT1L     | 0 | 0 |

|          |     |   |   |          |       |              |          |          |
|----------|-----|---|---|----------|-------|--------------|----------|----------|
| 874      | 1   | 0 | 0 | 0.554255 | FALSE | 0 DPYSL3     | 0        | 0        |
| 874      | 1   | 0 | 0 | 0.554255 | FALSE | 0 DRG1       | 0        | 0        |
| 874      | 1   | 0 | 0 | 0.554255 | FALSE | 0 DTNB       | 0        | 0        |
| 874      | 1   | 0 | 0 | 0.554255 | FALSE | 0 DUS1L      | 0        | 0        |
| 874      | 1   | 0 | 0 | 0.554255 | FALSE | 0 DUSP16     | 0        | 0        |
| 874      | 1   | 0 | 0 | 0.554255 | FALSE | 0 DYRK1B     | 0        | 0        |
| 874      | 1   | 0 | 0 | 0.554255 | FALSE | 0 EFNA1      | 0        | 0        |
| 874      | 1   | 0 | 0 | 0.554255 | FALSE | 0 EIF1       | 0        | 0        |
| 874      | 1   | 0 | 0 | 0.554255 | FALSE | 0 EIF2AK2    | 0        | 0        |
| 874      | 1   | 0 | 0 | 0.554255 | FALSE | 0 EIF2B1     | 0        | 0        |
| 874      | 1   | 0 | 0 | 0.554255 | FALSE | 0 EIF2S3L    | 0        | 0        |
| 874      | 1   | 0 | 0 | 0.554255 | FALSE | 0 EIF3A      | 0        | 0        |
| 874      | 1   | 0 | 0 | 0.554255 | FALSE | 0 ELMO2      | 0        | 0        |
| 874      | 1   | 0 | 0 | 0.554255 | FALSE | 0 ELMOD1     | 0        | 0        |
| 874      | 1   | 0 | 0 | 0.554255 | FALSE | 0 ENO4       | 0        | 0        |
| 874      | 1   | 0 | 0 | 0.554255 | FALSE | 0 EPB42      | 0        | 0        |
| 874      | 1   | 0 | 0 | 0.554255 | FALSE | 0 EPN1       | 0        | 0        |
| 874      | 1   | 0 | 0 | 0.554255 | FALSE | 0 ERGIC1     | 0        | 0        |
| 874      | 1   | 0 | 0 | 0.554255 | FALSE | 0 ERK5       | 0        | 0        |
| 874      | 1   | 0 | 0 | 0.554255 | FALSE | 0 ETFDH      | 0        | 0        |
| 2.807757 | 593 | 0 | 0 | 0.703625 | TRUE  | 0 hsa-miR-14 | 5.01E+08 | 0.106339 |
| 874      | 1   | 0 | 0 | 0.554255 | FALSE | 0 EXOSC10    | 0        | 0        |
| 874      | 1   | 0 | 0 | 0.554255 | FALSE | 0 FAM120AC   | 0        | 0        |
| 874      | 1   | 0 | 0 | 0.554255 | FALSE | 0 FAM60A     | 0        | 0        |
| 874      | 1   | 0 | 0 | 0.554255 | FALSE | 0 FAM71F2    | 0        | 0        |
| 874      | 1   | 0 | 0 | 0.554255 | FALSE | 0 FAM76B     | 0        | 0        |
| 874      | 1   | 0 | 0 | 0.554255 | FALSE | 0 FAM83F     | 0        | 0        |
| 874      | 1   | 0 | 0 | 0.554255 | FALSE | 0 FBXO31     | 0        | 0        |
| 874      | 1   | 0 | 0 | 0.554255 | FALSE | 0 FBXO38     | 0        | 0        |
| 874      | 1   | 0 | 0 | 0.554255 | FALSE | 0 FGD6       | 0        | 0        |
| 874      | 1   | 0 | 0 | 0.554255 | FALSE | 0 FHIT       | 0        | 0        |
| 874      | 1   | 0 | 0 | 0.554255 | FALSE | 0 FIGNL1     | 0        | 0        |
| 874      | 1   | 0 | 0 | 0.554255 | FALSE | 0 FNDC1      | 0        | 0        |
| 874      | 1   | 0 | 0 | 0.554255 | FALSE | 0 FOSB       | 0        | 0        |
| 874      | 1   | 0 | 0 | 0.554255 | FALSE | 0 FOXJ2      | 0        | 0        |
| 874      | 1   | 0 | 0 | 0.554255 | FALSE | 0 FSD2       | 0        | 0        |
| 874      | 1   | 0 | 0 | 0.554255 | FALSE | 0 FTL        | 0        | 0        |
| 874      | 1   | 0 | 0 | 0.554255 | FALSE | 0 FZD2       | 0        | 0        |
| 874      | 1   | 0 | 0 | 0.554255 | FALSE | 0 G6PD       | 0        | 0        |
| 874      | 1   | 0 | 0 | 0.554255 | FALSE | 0 GABBR1     | 0        | 0        |
| 874      | 1   | 0 | 0 | 0.554255 | FALSE | 0 GAL        | 0        | 0        |
| 874      | 1   | 0 | 0 | 0.554255 | FALSE | 0 GATM       | 0        | 0        |
| 874      | 1   | 0 | 0 | 0.554255 | FALSE | 0 GLB1L      | 0        | 0        |
| 874      | 1   | 0 | 0 | 0.554255 | FALSE | 0 GLRA3      | 0        | 0        |
| 874      | 1   | 0 | 0 | 0.554255 | FALSE | 0 GMEB1      | 0        | 0        |
| 874      | 1   | 0 | 0 | 0.554255 | FALSE | 0 GOLGA8B    | 0        | 0        |
| 874      | 1   | 0 | 0 | 0.554255 | FALSE | 0 GORAB      | 0        | 0        |

|     |   |   |   |          |       |   |           |   |   |
|-----|---|---|---|----------|-------|---|-----------|---|---|
| 874 | 1 | 0 | 0 | 0.554255 | FALSE | 0 | GPR180    | 0 | 0 |
| 874 | 1 | 0 | 0 | 0.554255 | FALSE | 0 | GPT2      | 0 | 0 |
| 874 | 1 | 0 | 0 | 0.554255 | FALSE | 0 | GTF2H5    | 0 | 0 |
| 874 | 1 | 0 | 0 | 0.554255 | FALSE | 0 | GTF3C2    | 0 | 0 |
| 874 | 1 | 0 | 0 | 0.554255 | FALSE | 0 | GTF3C3    | 0 | 0 |
| 874 | 1 | 0 | 0 | 0.554255 | FALSE | 0 | GUCY1A3   | 0 | 0 |
| 874 | 1 | 0 | 0 | 0.554255 | FALSE | 0 | GXYLT1    | 0 | 0 |
| 874 | 1 | 0 | 0 | 0.554255 | FALSE | 0 | GYG1      | 0 | 0 |
| 874 | 1 | 0 | 0 | 0.554255 | FALSE | 0 | HCCS      | 0 | 0 |
| 874 | 1 | 0 | 0 | 0.554255 | FALSE | 0 | HDHD1     | 0 | 0 |
| 874 | 1 | 0 | 0 | 0.554255 | FALSE | 0 | HINT1     | 0 | 0 |
| 874 | 1 | 0 | 0 | 0.554255 | FALSE | 0 | HIST1H2BC | 0 | 0 |
| 874 | 1 | 0 | 0 | 0.554255 | FALSE | 0 | HIVEP1    | 0 | 0 |
| 874 | 1 | 0 | 0 | 0.554255 | FALSE | 0 | HLA-E     | 0 | 0 |
| 874 | 1 | 0 | 0 | 0.554255 | FALSE | 0 | HMGB1     | 0 | 0 |
| 874 | 1 | 0 | 0 | 0.554255 | FALSE | 0 | HOXB2     | 0 | 0 |
| 874 | 1 | 0 | 0 | 0.554255 | FALSE | 0 | HOXC6     | 0 | 0 |
| 874 | 1 | 0 | 0 | 0.554255 | FALSE | 0 | HRAS      | 0 | 0 |
| 874 | 1 | 0 | 0 | 0.554255 | FALSE | 0 | HS6ST2    | 0 | 0 |
| 874 | 1 | 0 | 0 | 0.554255 | FALSE | 0 | HTT       | 0 | 0 |
| 874 | 1 | 0 | 0 | 0.554255 | FALSE | 0 | HYPK      | 0 | 0 |
| 874 | 1 | 0 | 0 | 0.554255 | FALSE | 0 | IAPP      | 0 | 0 |
| 874 | 1 | 0 | 0 | 0.554255 | FALSE | 0 | IFNAR2    | 0 | 0 |
| 874 | 1 | 0 | 0 | 0.554255 | FALSE | 0 | IL10RB    | 0 | 0 |
| 874 | 1 | 0 | 0 | 0.554255 | FALSE | 0 | IL13RA1   | 0 | 0 |
| 874 | 1 | 0 | 0 | 0.554255 | FALSE | 0 | IMPDH2    | 0 | 0 |
| 874 | 1 | 0 | 0 | 0.554255 | FALSE | 0 | INPP5F    | 0 | 0 |
| 874 | 1 | 0 | 0 | 0.554255 | FALSE | 0 | IPO11     | 0 | 0 |
| 874 | 1 | 0 | 0 | 0.554255 | FALSE | 0 | ITGB4     | 0 | 0 |
| 874 | 1 | 0 | 0 | 0.554255 | FALSE | 0 | JAKMIP2   | 0 | 0 |
| 874 | 1 | 0 | 0 | 0.554255 | FALSE | 0 | JDP2      | 0 | 0 |
| 874 | 1 | 0 | 0 | 0.554255 | FALSE | 0 | JPH1      | 0 | 0 |
| 874 | 1 | 0 | 0 | 0.554255 | FALSE | 0 | KANK2     | 0 | 0 |
| 874 | 1 | 0 | 0 | 0.554255 | FALSE | 0 | KARS      | 0 | 0 |
| 874 | 1 | 0 | 0 | 0.554255 | FALSE | 0 | KAT6A     | 0 | 0 |
| 874 | 1 | 0 | 0 | 0.554255 | FALSE | 0 | KAT6B     | 0 | 0 |
| 874 | 1 | 0 | 0 | 0.554255 | FALSE | 0 | KCNJ3     | 0 | 0 |
| 874 | 1 | 0 | 0 | 0.554255 | FALSE | 0 | KDM1A     | 0 | 0 |
| 874 | 1 | 0 | 0 | 0.554255 | FALSE | 0 | KIAA0355  | 0 | 0 |
| 874 | 1 | 0 | 0 | 0.554255 | FALSE | 0 | KIAA1147  | 0 | 0 |
| 874 | 1 | 0 | 0 | 0.554255 | FALSE | 0 | KIF23     | 0 | 0 |
| 874 | 1 | 0 | 0 | 0.554255 | FALSE | 0 | KLK10     | 0 | 0 |
| 874 | 1 | 0 | 0 | 0.554255 | FALSE | 0 | KPNA1     | 0 | 0 |
| 874 | 1 | 0 | 0 | 0.554255 | FALSE | 0 | LGR4      | 0 | 0 |
| 874 | 1 | 0 | 0 | 0.554255 | FALSE | 0 | LMAN2     | 0 | 0 |
| 874 | 1 | 0 | 0 | 0.554255 | FALSE | 0 | LMBR1L    | 0 | 0 |
| 874 | 1 | 0 | 0 | 0.554255 | FALSE | 0 | LMO7      | 0 | 0 |

|     |   |   |   |          |       |   |           |   |   |
|-----|---|---|---|----------|-------|---|-----------|---|---|
| 874 | 1 | 0 | 0 | 0.554255 | FALSE | 0 | LOXL4     | 0 | 0 |
| 874 | 1 | 0 | 0 | 0.554255 | FALSE | 0 | LRAT      | 0 | 0 |
| 874 | 1 | 0 | 0 | 0.554255 | FALSE | 0 | LRIT3     | 0 | 0 |
| 874 | 1 | 0 | 0 | 0.554255 | FALSE | 0 | LRP1      | 0 | 0 |
| 874 | 1 | 0 | 0 | 0.554255 | FALSE | 0 | LYN       | 0 | 0 |
| 874 | 1 | 0 | 0 | 0.554255 | FALSE | 0 | LZTR1     | 0 | 0 |
| 874 | 1 | 0 | 0 | 0.554255 | FALSE | 0 | MACC1     | 0 | 0 |
| 874 | 1 | 0 | 0 | 0.554255 | FALSE | 0 | MAPK7     | 0 | 0 |
| 874 | 1 | 0 | 0 | 0.554255 | FALSE | 0 | MCM3      | 0 | 0 |
| 874 | 1 | 0 | 0 | 0.554255 | FALSE | 0 | MCMBP     | 0 | 0 |
| 874 | 1 | 0 | 0 | 0.554255 | FALSE | 0 | MCRS1     | 0 | 0 |
| 874 | 1 | 0 | 0 | 0.554255 | FALSE | 0 | MDC1      | 0 | 0 |
| 874 | 1 | 0 | 0 | 0.554255 | FALSE | 0 | MED12     | 0 | 0 |
| 874 | 1 | 0 | 0 | 0.554255 | FALSE | 0 | MED14     | 0 | 0 |
| 874 | 1 | 0 | 0 | 0.554255 | FALSE | 0 | METAP1    | 0 | 0 |
| 874 | 1 | 0 | 0 | 0.554255 | FALSE | 0 | MGA       | 0 | 0 |
| 874 | 1 | 0 | 0 | 0.554255 | FALSE | 0 | MLF2      | 0 | 0 |
| 874 | 1 | 0 | 0 | 0.554255 | FALSE | 0 | MLLT3     | 0 | 0 |
| 874 | 1 | 0 | 0 | 0.554255 | FALSE | 0 | MMP-13    | 0 | 0 |
| 874 | 1 | 0 | 0 | 0.554255 | FALSE | 0 | MMP13     | 0 | 0 |
| 874 | 1 | 0 | 0 | 0.554255 | FALSE | 0 | MON1A     | 0 | 0 |
| 874 | 1 | 0 | 0 | 0.554255 | FALSE | 0 | MRPL18    | 0 | 0 |
| 874 | 1 | 0 | 0 | 0.554255 | FALSE | 0 | MTMR3     | 0 | 0 |
| 874 | 1 | 0 | 0 | 0.554255 | FALSE | 0 | MUC13     | 0 | 0 |
| 874 | 1 | 0 | 0 | 0.554255 | FALSE | 0 | NAT6      | 0 | 0 |
| 874 | 1 | 0 | 0 | 0.554255 | FALSE | 0 | NBEA      | 0 | 0 |
| 874 | 1 | 0 | 0 | 0.554255 | FALSE | 0 | NCKIPSD   | 0 | 0 |
| 874 | 1 | 0 | 0 | 0.554255 | FALSE | 0 | NEK6      | 0 | 0 |
| 874 | 1 | 0 | 0 | 0.554255 | FALSE | 0 | NF-??B    | 0 | 0 |
| 874 | 1 | 0 | 0 | 0.554255 | FALSE | 0 | NFKB2     | 0 | 0 |
| 874 | 1 | 0 | 0 | 0.554255 | FALSE | 0 | NKTR      | 0 | 0 |
| 874 | 1 | 0 | 0 | 0.554255 | FALSE | 0 | NOL8      | 0 | 0 |
| 874 | 1 | 0 | 0 | 0.554255 | FALSE | 0 | NPAT      | 0 | 0 |
| 874 | 1 | 0 | 0 | 0.554255 | FALSE | 0 | NPM1      | 0 | 0 |
| 874 | 1 | 0 | 0 | 0.554255 | FALSE | 0 | NPR1      | 0 | 0 |
| 874 | 1 | 0 | 0 | 0.554255 | FALSE | 0 | NPR3      | 0 | 0 |
| 874 | 1 | 0 | 0 | 0.554255 | FALSE | 0 | NSUN4     | 0 | 0 |
| 874 | 1 | 0 | 0 | 0.554255 | FALSE | 0 | NUBPL     | 0 | 0 |
| 874 | 1 | 0 | 0 | 0.554255 | FALSE | 0 | NUCB1     | 0 | 0 |
| 874 | 1 | 0 | 0 | 0.554255 | FALSE | 0 | NUDCD1    | 0 | 0 |
| 874 | 1 | 0 | 0 | 0.554255 | FALSE | 0 | ODF2L     | 0 | 0 |
| 874 | 1 | 0 | 0 | 0.554255 | FALSE | 0 | OSBPL2    | 0 | 0 |
| 874 | 1 | 0 | 0 | 0.554255 | FALSE | 0 | OSBPL8    | 0 | 0 |
| 874 | 1 | 0 | 0 | 0.554255 | FALSE | 0 | OSTF1     | 0 | 0 |
| 874 | 1 | 0 | 0 | 0.554255 | FALSE | 0 | PALLD     | 0 | 0 |
| 874 | 1 | 0 | 0 | 0.554255 | FALSE | 0 | PAN3      | 0 | 0 |
| 874 | 1 | 0 | 0 | 0.554255 | FALSE | 0 | PARD6G-A' | 0 | 0 |

|     |   |   |   |          |       |   |          |   |   |
|-----|---|---|---|----------|-------|---|----------|---|---|
| 874 | 1 | 0 | 0 | 0.554255 | FALSE | 0 | PCDHGA8  | 0 | 0 |
| 874 | 1 | 0 | 0 | 0.554255 | FALSE | 0 | PDCD11   | 0 | 0 |
| 874 | 1 | 0 | 0 | 0.554255 | FALSE | 0 | PDGFB    | 0 | 0 |
| 874 | 1 | 0 | 0 | 0.554255 | FALSE | 0 | PERP     | 0 | 0 |
| 874 | 1 | 0 | 0 | 0.554255 | FALSE | 0 | PGD      | 0 | 0 |
| 874 | 1 | 0 | 0 | 0.554255 | FALSE | 0 | PGLS     | 0 | 0 |
| 874 | 1 | 0 | 0 | 0.554255 | FALSE | 0 | PHAX     | 0 | 0 |
| 874 | 1 | 0 | 0 | 0.554255 | FALSE | 0 | PKD2     | 0 | 0 |
| 874 | 1 | 0 | 0 | 0.554255 | FALSE | 0 | PKP2     | 0 | 0 |
| 874 | 1 | 0 | 0 | 0.554255 | FALSE | 0 | PLCD3    | 0 | 0 |
| 874 | 1 | 0 | 0 | 0.554255 | FALSE | 0 | PLCL2    | 0 | 0 |
| 874 | 1 | 0 | 0 | 0.554255 | FALSE | 0 | PLEKHM3  | 0 | 0 |
| 874 | 1 | 0 | 0 | 0.554255 | FALSE | 0 | PNPO     | 0 | 0 |
| 874 | 1 | 0 | 0 | 0.554255 | FALSE | 0 | POC5     | 0 | 0 |
| 874 | 1 | 0 | 0 | 0.554255 | FALSE | 0 | POLR2C   | 0 | 0 |
| 874 | 1 | 0 | 0 | 0.554255 | FALSE | 0 | POLR3A   | 0 | 0 |
| 874 | 1 | 0 | 0 | 0.554255 | FALSE | 0 | PPIA     | 0 | 0 |
| 874 | 1 | 0 | 0 | 0.554255 | FALSE | 0 | PPP1R15A | 0 | 0 |
| 874 | 1 | 0 | 0 | 0.554255 | FALSE | 0 | PPP4R2   | 0 | 0 |
| 874 | 1 | 0 | 0 | 0.554255 | FALSE | 0 | PRDM4    | 0 | 0 |
| 874 | 1 | 0 | 0 | 0.554255 | FALSE | 0 | PRKAB2   | 0 | 0 |
| 874 | 1 | 0 | 0 | 0.554255 | FALSE | 0 | PRR23A   | 0 | 0 |
| 874 | 1 | 0 | 0 | 0.554255 | FALSE | 0 | PRRC2B   | 0 | 0 |
| 874 | 1 | 0 | 0 | 0.554255 | FALSE | 0 | PRSS23   | 0 | 0 |
| 874 | 1 | 0 | 0 | 0.554255 | FALSE | 0 | PSD3     | 0 | 0 |
| 874 | 1 | 0 | 0 | 0.554255 | FALSE | 0 | PXK      | 0 | 0 |
| 874 | 1 | 0 | 0 | 0.554255 | FALSE | 0 | R3HCC1L  | 0 | 0 |
| 874 | 1 | 0 | 0 | 0.554255 | FALSE | 0 | RAB22A   | 0 | 0 |
| 874 | 1 | 0 | 0 | 0.554255 | FALSE | 0 | RAD1     | 0 | 0 |
| 874 | 1 | 0 | 0 | 0.554255 | FALSE | 0 | RAE1     | 0 | 0 |
| 874 | 1 | 0 | 0 | 0.554255 | FALSE | 0 | RANBP10  | 0 | 0 |
| 874 | 1 | 0 | 0 | 0.554255 | FALSE | 0 | RBBP4    | 0 | 0 |
| 874 | 1 | 0 | 0 | 0.554255 | FALSE | 0 | RBBP6    | 0 | 0 |
| 874 | 1 | 0 | 0 | 0.554255 | FALSE | 0 | RBFOX2   | 0 | 0 |
| 874 | 1 | 0 | 0 | 0.554255 | FALSE | 0 | RBM12    | 0 | 0 |
| 874 | 1 | 0 | 0 | 0.554255 | FALSE | 0 | RBM33    | 0 | 0 |
| 874 | 1 | 0 | 0 | 0.554255 | FALSE | 0 | RBMS1    | 0 | 0 |
| 874 | 1 | 0 | 0 | 0.554255 | FALSE | 0 | RHBDD2   | 0 | 0 |
| 874 | 1 | 0 | 0 | 0.554255 | FALSE | 0 | RHOT1    | 0 | 0 |
| 874 | 1 | 0 | 0 | 0.554255 | FALSE | 0 | RINT1    | 0 | 0 |
| 874 | 1 | 0 | 0 | 0.554255 | FALSE | 0 | RIT1     | 0 | 0 |
| 874 | 1 | 0 | 0 | 0.554255 | FALSE | 0 | RMND5A   | 0 | 0 |
| 874 | 1 | 0 | 0 | 0.554255 | FALSE | 0 | RNH1     | 0 | 0 |
| 874 | 1 | 0 | 0 | 0.554255 | FALSE | 0 | RPL13    | 0 | 0 |
| 874 | 1 | 0 | 0 | 0.554255 | FALSE | 0 | RPL37    | 0 | 0 |
| 874 | 1 | 0 | 0 | 0.554255 | FALSE | 0 | RPS27    | 0 | 0 |
| 874 | 1 | 0 | 0 | 0.554255 | FALSE | 0 | RPS6KA2  | 0 | 0 |

|     |   |   |   |          |       |            |   |   |
|-----|---|---|---|----------|-------|------------|---|---|
| 874 | 1 | 0 | 0 | 0.554255 | FALSE | 0 RPTOR    | 0 | 0 |
| 874 | 1 | 0 | 0 | 0.554255 | FALSE | 0 RUNDC1   | 0 | 0 |
| 874 | 1 | 0 | 0 | 0.554255 | FALSE | 0 S100A10  | 0 | 0 |
| 874 | 1 | 0 | 0 | 0.554255 | FALSE | 0 SAE1     | 0 | 0 |
| 874 | 1 | 0 | 0 | 0.554255 | FALSE | 0 SAP130   | 0 | 0 |
| 874 | 1 | 0 | 0 | 0.554255 | FALSE | 0 SARS     | 0 | 0 |
| 874 | 1 | 0 | 0 | 0.554255 | FALSE | 0 SCN11A   | 0 | 0 |
| 874 | 1 | 0 | 0 | 0.554255 | FALSE | 0 SCN2B    | 0 | 0 |
| 874 | 1 | 0 | 0 | 0.554255 | FALSE | 0 SDR39U1  | 0 | 0 |
| 874 | 1 | 0 | 0 | 0.554255 | FALSE | 0 SERPINB1 | 0 | 0 |
| 874 | 1 | 0 | 0 | 0.554255 | FALSE | 0 SETMAR   | 0 | 0 |
| 874 | 1 | 0 | 0 | 0.554255 | FALSE | 0 SF3B2    | 0 | 0 |
| 874 | 1 | 0 | 0 | 0.554255 | FALSE | 0 SFXN2    | 0 | 0 |
| 874 | 1 | 0 | 0 | 0.554255 | FALSE | 0 SIK1     | 0 | 0 |
| 874 | 1 | 0 | 0 | 0.554255 | FALSE | 0 SIPA1L3  | 0 | 0 |
| 874 | 1 | 0 | 0 | 0.554255 | FALSE | 0 SLC15A4  | 0 | 0 |
| 874 | 1 | 0 | 0 | 0.554255 | FALSE | 0 SLC1A3   | 0 | 0 |
| 874 | 1 | 0 | 0 | 0.554255 | FALSE | 0 SLC25A42 | 0 | 0 |
| 874 | 1 | 0 | 0 | 0.554255 | FALSE | 0 SLC26A6  | 0 | 0 |
| 874 | 1 | 0 | 0 | 0.554255 | FALSE | 0 SLC2A14  | 0 | 0 |
| 874 | 1 | 0 | 0 | 0.554255 | FALSE | 0 SLC30A9  | 0 | 0 |
| 874 | 1 | 0 | 0 | 0.554255 | FALSE | 0 SLC35B2  | 0 | 0 |
| 874 | 1 | 0 | 0 | 0.554255 | FALSE | 0 SLC35F6  | 0 | 0 |
| 874 | 1 | 0 | 0 | 0.554255 | FALSE | 0 SLC38A7  | 0 | 0 |
| 874 | 1 | 0 | 0 | 0.554255 | FALSE | 0 SLC39A1  | 0 | 0 |
| 874 | 1 | 0 | 0 | 0.554255 | FALSE | 0 SLC6A18  | 0 | 0 |
| 874 | 1 | 0 | 0 | 0.554255 | FALSE | 0 SMG9     | 0 | 0 |
| 874 | 1 | 0 | 0 | 0.554255 | FALSE | 0 SNX2     | 0 | 0 |
| 874 | 1 | 0 | 0 | 0.554255 | FALSE | 0 SOBP     | 0 | 0 |
| 874 | 1 | 0 | 0 | 0.554255 | FALSE | 0 SP110    | 0 | 0 |
| 874 | 1 | 0 | 0 | 0.554255 | FALSE | 0 SP2      | 0 | 0 |
| 874 | 1 | 0 | 0 | 0.554255 | FALSE | 0 SPRED3   | 0 | 0 |
| 874 | 1 | 0 | 0 | 0.554255 | FALSE | 0 SPTLC2   | 0 | 0 |
| 874 | 1 | 0 | 0 | 0.554255 | FALSE | 0 SRCAP    | 0 | 0 |
| 874 | 1 | 0 | 0 | 0.554255 | FALSE | 0 SRRM1    | 0 | 0 |
| 874 | 1 | 0 | 0 | 0.554255 | FALSE | 0 SRRM2    | 0 | 0 |
| 874 | 1 | 0 | 0 | 0.554255 | FALSE | 0 STRBP    | 0 | 0 |
| 874 | 1 | 0 | 0 | 0.554255 | FALSE | 0 STRN     | 0 | 0 |
| 874 | 1 | 0 | 0 | 0.554255 | FALSE | 0 SWSAP1   | 0 | 0 |
| 874 | 1 | 0 | 0 | 0.554255 | FALSE | 0 SYCE1    | 0 | 0 |
| 874 | 1 | 0 | 0 | 0.554255 | FALSE | 0 TAF10    | 0 | 0 |
| 874 | 1 | 0 | 0 | 0.554255 | FALSE | 0 TAF4B    | 0 | 0 |
| 874 | 1 | 0 | 0 | 0.554255 | FALSE | 0 TALDO1   | 0 | 0 |
| 874 | 1 | 0 | 0 | 0.554255 | FALSE | 0 TATDN2   | 0 | 0 |
| 874 | 1 | 0 | 0 | 0.554255 | FALSE | 0 TECPR1   | 0 | 0 |
| 874 | 1 | 0 | 0 | 0.554255 | FALSE | 0 TENM4    | 0 | 0 |
| 874 | 1 | 0 | 0 | 0.554255 | FALSE | 0 TFPI     | 0 | 0 |



|     |   |   |   |          |       |   |          |   |   |
|-----|---|---|---|----------|-------|---|----------|---|---|
| 874 | 1 | 0 | 0 | 0.554255 | FALSE | 0 | THAP1    | 0 | 0 |
| 874 | 1 | 0 | 0 | 0.554255 | FALSE | 0 | TMCO3    | 0 | 0 |
| 874 | 1 | 0 | 0 | 0.554255 | FALSE | 0 | TMED10   | 0 | 0 |
| 874 | 1 | 0 | 0 | 0.554255 | FALSE | 0 | TMEM120/ | 0 | 0 |
| 874 | 1 | 0 | 0 | 0.554255 | FALSE | 0 | TMEM205  | 0 | 0 |
| 874 | 1 | 0 | 0 | 0.554255 | FALSE | 0 | TMEM97   | 0 | 0 |
| 874 | 1 | 0 | 0 | 0.554255 | FALSE | 0 | TONSL    | 0 | 0 |
| 874 | 1 | 0 | 0 | 0.554255 | FALSE | 0 | TPP1     | 0 | 0 |
| 874 | 1 | 0 | 0 | 0.554255 | FALSE | 0 | TRAPPC8  | 0 | 0 |
| 874 | 1 | 0 | 0 | 0.554255 | FALSE | 0 | TSPAN11  | 0 | 0 |
| 874 | 1 | 0 | 0 | 0.554255 | FALSE | 0 | TTC38    | 0 | 0 |
| 874 | 1 | 0 | 0 | 0.554255 | FALSE | 0 | TUBA1B   | 0 | 0 |
| 874 | 1 | 0 | 0 | 0.554255 | FALSE | 0 | TUBB2A   | 0 | 0 |
| 874 | 1 | 0 | 0 | 0.554255 | FALSE | 0 | TULP3    | 0 | 0 |
| 874 | 1 | 0 | 0 | 0.554255 | FALSE | 0 | TXNL4B   | 0 | 0 |
| 874 | 1 | 0 | 0 | 0.554255 | FALSE | 0 | UBE2E1   | 0 | 0 |
| 874 | 1 | 0 | 0 | 0.554255 | FALSE | 0 | UBE2E3   | 0 | 0 |
| 874 | 1 | 0 | 0 | 0.554255 | FALSE | 0 | UBE2R2   | 0 | 0 |
| 874 | 1 | 0 | 0 | 0.554255 | FALSE | 0 | UBTF     | 0 | 0 |
| 874 | 1 | 0 | 0 | 0.554255 | FALSE | 0 | UCK2     | 0 | 0 |
| 874 | 1 | 0 | 0 | 0.554255 | FALSE | 0 | UNKL     | 0 | 0 |
| 874 | 1 | 0 | 0 | 0.554255 | FALSE | 0 | UQCC1    | 0 | 0 |
| 874 | 1 | 0 | 0 | 0.554255 | FALSE | 0 | VASH1    | 0 | 0 |
| 874 | 1 | 0 | 0 | 0.554255 | FALSE | 0 | VKORC1L1 | 0 | 0 |
| 874 | 1 | 0 | 0 | 0.554255 | FALSE | 0 | VOPP1    | 0 | 0 |
| 874 | 1 | 0 | 0 | 0.554255 | FALSE | 0 | VTI1B    | 0 | 0 |
| 874 | 1 | 0 | 0 | 0.554255 | FALSE | 0 | WDFY1    | 0 | 0 |
| 874 | 1 | 0 | 0 | 0.554255 | FALSE | 0 | WDR11    | 0 | 0 |
| 874 | 1 | 0 | 0 | 0.554255 | FALSE | 0 | WDR12    | 0 | 0 |
| 874 | 1 | 0 | 0 | 0.554255 | FALSE | 0 | WDR76    | 0 | 0 |
| 874 | 1 | 0 | 0 | 0.554255 | FALSE | 0 | WDR81    | 0 | 0 |
| 874 | 1 | 0 | 0 | 0.554255 | FALSE | 0 | WDR82    | 0 | 0 |
| 874 | 1 | 0 | 0 | 0.554255 | FALSE | 0 | WIPF2    | 0 | 0 |
| 874 | 1 | 0 | 0 | 0.554255 | FALSE | 0 | WIZ      | 0 | 0 |
| 874 | 1 | 0 | 0 | 0.554255 | FALSE | 0 | XPR1     | 0 | 0 |
| 874 | 1 | 0 | 0 | 0.554255 | FALSE | 0 | YPEL5    | 0 | 0 |
| 874 | 1 | 0 | 0 | 0.554255 | FALSE | 0 | YWHAQ    | 0 | 0 |
| 874 | 1 | 0 | 0 | 0.554255 | FALSE | 0 | ZBTB3    | 0 | 0 |
| 874 | 1 | 0 | 0 | 0.554255 | FALSE | 0 | ZBTB44   | 0 | 0 |
| 874 | 1 | 0 | 0 | 0.554255 | FALSE | 0 | ZC3H15   | 0 | 0 |
| 874 | 1 | 0 | 0 | 0.554255 | FALSE | 0 | ZDHHC2   | 0 | 0 |
| 874 | 1 | 0 | 0 | 0.554255 | FALSE | 0 | ZDHHC3   | 0 | 0 |
| 874 | 1 | 0 | 0 | 0.554255 | FALSE | 0 | ZFP36    | 0 | 0 |
| 874 | 1 | 0 | 0 | 0.554255 | FALSE | 0 | ZFP37    | 0 | 0 |
| 874 | 1 | 0 | 0 | 0.554255 | FALSE | 0 | ZHX2     | 0 | 0 |
| 874 | 1 | 0 | 0 | 0.554255 | FALSE | 0 | ZNF121   | 0 | 0 |
| 874 | 1 | 0 | 0 | 0.554255 | FALSE | 0 | ZNF23    | 0 | 0 |

|     |   |   |   |          |       |   |          |   |   |
|-----|---|---|---|----------|-------|---|----------|---|---|
| 874 | 1 | 0 | 0 | 0.554255 | FALSE | 0 | ZNF395   | 0 | 0 |
| 874 | 1 | 0 | 0 | 0.554255 | FALSE | 0 | ZNF429   | 0 | 0 |
| 874 | 1 | 0 | 0 | 0.554255 | FALSE | 0 | ZNF440   | 0 | 0 |
| 874 | 1 | 0 | 0 | 0.554255 | FALSE | 0 | ZNF559   | 0 | 0 |
| 874 | 1 | 0 | 0 | 0.554255 | FALSE | 0 | ZNF607   | 0 | 0 |
| 121 | 1 | 0 | 0 | 0.506636 | FALSE | 0 | ACER3    | 0 | 0 |
| 121 | 1 | 0 | 0 | 0.506636 | FALSE | 0 | ALDH7A1  | 0 | 0 |
| 121 | 1 | 0 | 0 | 0.506636 | FALSE | 0 | ANGPTL3  | 0 | 0 |
| 121 | 1 | 0 | 0 | 0.506636 | FALSE | 0 | ARHGAP21 | 0 | 0 |
| 121 | 1 | 0 | 0 | 0.506636 | FALSE | 0 | CADM3    | 0 | 0 |
| 121 | 1 | 0 | 0 | 0.506636 | FALSE | 0 | CDC5L    | 0 | 0 |
| 121 | 1 | 0 | 0 | 0.506636 | FALSE | 0 | CDH18    | 0 | 0 |
| 121 | 1 | 0 | 0 | 0.506636 | FALSE | 0 | CDK5R1   | 0 | 0 |
| 121 | 1 | 0 | 0 | 0.506636 | FALSE | 0 | ELAVL4   | 0 | 0 |
| 121 | 1 | 0 | 0 | 0.506636 | FALSE | 0 | EML5     | 0 | 0 |
| 121 | 1 | 0 | 0 | 0.506636 | FALSE | 0 | ESRRG    | 0 | 0 |
| 121 | 1 | 0 | 0 | 0.506636 | FALSE | 0 | FRMD4A   | 0 | 0 |
| 121 | 1 | 0 | 0 | 0.506636 | FALSE | 0 | GEM      | 0 | 0 |
| 121 | 1 | 0 | 0 | 0.506636 | FALSE | 0 | GGCX     | 0 | 0 |
| 121 | 1 | 0 | 0 | 0.506636 | FALSE | 0 | GNL1     | 0 | 0 |
| 121 | 1 | 0 | 0 | 0.506636 | FALSE | 0 | GUCY1A2  | 0 | 0 |
| 121 | 1 | 0 | 0 | 0.506636 | FALSE | 0 | LONP2    | 0 | 0 |
| 121 | 1 | 0 | 0 | 0.506636 | FALSE | 0 | LUM      | 0 | 0 |
| 121 | 1 | 0 | 0 | 0.506636 | FALSE | 0 | NTRK2    | 0 | 0 |
| 121 | 1 | 0 | 0 | 0.506636 | FALSE | 0 | PDIA6    | 0 | 0 |
| 121 | 1 | 0 | 0 | 0.506636 | FALSE | 0 | PLCE1    | 0 | 0 |
| 121 | 1 | 0 | 0 | 0.506636 | FALSE | 0 | POLE3    | 0 | 0 |
| 121 | 1 | 0 | 0 | 0.506636 | FALSE | 0 | PPIP5K2  | 0 | 0 |
| 121 | 1 | 0 | 0 | 0.506636 | FALSE | 0 | PPL      | 0 | 0 |
| 121 | 1 | 0 | 0 | 0.506636 | FALSE | 0 | PREP     | 0 | 0 |
| 121 | 1 | 0 | 0 | 0.506636 | FALSE | 0 | PRPF38A  | 0 | 0 |
| 121 | 1 | 0 | 0 | 0.506636 | FALSE | 0 | RPS16    | 0 | 0 |
| 121 | 1 | 0 | 0 | 0.506636 | FALSE | 0 | RPS24    | 0 | 0 |
| 121 | 1 | 0 | 0 | 0.506636 | FALSE | 0 | SHC1     | 0 | 0 |
| 121 | 1 | 0 | 0 | 0.506636 | FALSE | 0 | SIGLEC14 | 0 | 0 |
| 121 | 1 | 0 | 0 | 0.506636 | FALSE | 0 | SLC13A4  | 0 | 0 |
| 121 | 1 | 0 | 0 | 0.506636 | FALSE | 0 | TBC1D8   | 0 | 0 |
| 121 | 1 | 0 | 0 | 0.506636 | FALSE | 0 | TM7SF3   | 0 | 0 |
| 121 | 1 | 0 | 0 | 0.506636 | FALSE | 0 | TMCC2    | 0 | 0 |
| 121 | 1 | 0 | 0 | 0.506636 | FALSE | 0 | TRA2B    | 0 | 0 |
| 121 | 1 | 0 | 0 | 0.506636 | FALSE | 0 | TYW3     | 0 | 0 |
| 121 | 1 | 0 | 0 | 0.506636 | FALSE | 0 | VCAM1    | 0 | 0 |
| 121 | 1 | 0 | 0 | 0.506636 | FALSE | 0 | WRNIP1   | 0 | 0 |
| 645 | 1 | 0 | 0 | 0.540184 | FALSE | 0 | 4-Oct    | 0 | 0 |
| 645 | 1 | 0 | 0 | 0.540184 | FALSE | 0 | ABCE1    | 0 | 0 |
| 645 | 1 | 0 | 0 | 0.540184 | FALSE | 0 | ABCG2    | 0 | 0 |
| 645 | 1 | 0 | 0 | 0.540184 | FALSE | 0 | ACP6     | 0 | 0 |

|     |   |   |   |          |       |   |          |   |   |
|-----|---|---|---|----------|-------|---|----------|---|---|
| 645 | 1 | 0 | 0 | 0.540184 | FALSE | 0 | ACTG1    | 0 | 0 |
| 645 | 1 | 0 | 0 | 0.540184 | FALSE | 0 | ACVR1    | 0 | 0 |
| 645 | 1 | 0 | 0 | 0.540184 | FALSE | 0 | ADAM17   | 0 | 0 |
| 645 | 1 | 0 | 0 | 0.540184 | FALSE | 0 | AGPS     | 0 | 0 |
| 645 | 1 | 0 | 0 | 0.540184 | FALSE | 0 | AGTRAP   | 0 | 0 |
| 645 | 1 | 0 | 0 | 0.540184 | FALSE | 0 | AKAP12   | 0 | 0 |
| 645 | 1 | 0 | 0 | 0.540184 | FALSE | 0 | AKIRIN1  | 0 | 0 |
| 645 | 1 | 0 | 0 | 0.540184 | FALSE | 0 | AKR1B10  | 0 | 0 |
| 645 | 1 | 0 | 0 | 0.540184 | FALSE | 0 | ALDH3A1  | 0 | 0 |
| 645 | 1 | 0 | 0 | 0.540184 | FALSE | 0 | ALPPL2   | 0 | 0 |
| 645 | 1 | 0 | 0 | 0.540184 | FALSE | 0 | ANGPT2   | 0 | 0 |
| 645 | 1 | 0 | 0 | 0.540184 | FALSE | 0 | ANKRD28  | 0 | 0 |
| 645 | 1 | 0 | 0 | 0.540184 | FALSE | 0 | APH1A    | 0 | 0 |
| 645 | 1 | 0 | 0 | 0.540184 | FALSE | 0 | ARHGAP29 | 0 | 0 |
| 645 | 1 | 0 | 0 | 0.540184 | FALSE | 0 | ARHGEF28 | 0 | 0 |
| 645 | 1 | 0 | 0 | 0.540184 | FALSE | 0 | ARIH1    | 0 | 0 |
| 645 | 1 | 0 | 0 | 0.540184 | FALSE | 0 | BCAT1    | 0 | 0 |
| 645 | 1 | 0 | 0 | 0.540184 | FALSE | 0 | BCLAF3   | 0 | 0 |
| 645 | 1 | 0 | 0 | 0.540184 | FALSE | 0 | BHLHE41  | 0 | 0 |
| 645 | 1 | 0 | 0 | 0.540184 | FALSE | 0 | BIRC3    | 0 | 0 |
| 645 | 1 | 0 | 0 | 0.540184 | FALSE | 0 | BMP1     | 0 | 0 |
| 645 | 1 | 0 | 0 | 0.540184 | FALSE | 0 | BMP7     | 0 | 0 |
| 645 | 1 | 0 | 0 | 0.540184 | FALSE | 0 | BRPF3    | 0 | 0 |
| 645 | 1 | 0 | 0 | 0.540184 | FALSE | 0 | BTBD1    | 0 | 0 |
| 645 | 1 | 0 | 0 | 0.540184 | FALSE | 0 | C11orf65 | 0 | 0 |
| 645 | 1 | 0 | 0 | 0.540184 | FALSE | 0 | C1orf27  | 0 | 0 |
| 645 | 1 | 0 | 0 | 0.540184 | FALSE | 0 | C22orf46 | 0 | 0 |
| 645 | 1 | 0 | 0 | 0.540184 | FALSE | 0 | C2orf43  | 0 | 0 |
| 645 | 1 | 0 | 0 | 0.540184 | FALSE | 0 | CAMK1D   | 0 | 0 |
| 645 | 1 | 0 | 0 | 0.540184 | FALSE | 0 | CAMK2N1  | 0 | 0 |
| 645 | 1 | 0 | 0 | 0.540184 | FALSE | 0 | CBFB     | 0 | 0 |
| 645 | 1 | 0 | 0 | 0.540184 | FALSE | 0 | CCDC43   | 0 | 0 |
| 645 | 1 | 0 | 0 | 0.540184 | FALSE | 0 | CCDC85C  | 0 | 0 |
| 645 | 1 | 0 | 0 | 0.540184 | FALSE | 0 | CCL20    | 0 | 0 |
| 645 | 1 | 0 | 0 | 0.540184 | FALSE | 0 | CD40     | 0 | 0 |
| 645 | 1 | 0 | 0 | 0.540184 | FALSE | 0 | CD59     | 0 | 0 |
| 645 | 1 | 0 | 0 | 0.540184 | FALSE | 0 | CEP19    | 0 | 0 |
| 645 | 1 | 0 | 0 | 0.540184 | FALSE | 0 | CEP63    | 0 | 0 |
| 645 | 1 | 0 | 0 | 0.540184 | FALSE | 0 | CHCHD1   | 0 | 0 |
| 645 | 1 | 0 | 0 | 0.540184 | FALSE | 0 | CHCHD10  | 0 | 0 |
| 645 | 1 | 0 | 0 | 0.540184 | FALSE | 0 | CIQTNF5  | 0 | 0 |
| 645 | 1 | 0 | 0 | 0.540184 | FALSE | 0 | CKAP2L   | 0 | 0 |
| 645 | 1 | 0 | 0 | 0.540184 | FALSE | 0 | CKAP5    | 0 | 0 |
| 645 | 1 | 0 | 0 | 0.540184 | FALSE | 0 | CLINT1   | 0 | 0 |
| 645 | 1 | 0 | 0 | 0.540184 | FALSE | 0 | CLUAP1   | 0 | 0 |
| 645 | 1 | 0 | 0 | 0.540184 | FALSE | 0 | CPSF3    | 0 | 0 |
| 645 | 1 | 0 | 0 | 0.540184 | FALSE | 0 | CRAMP1   | 0 | 0 |

|          |     |   |   |          |       |   |            |          |          |
|----------|-----|---|---|----------|-------|---|------------|----------|----------|
| 645      | 1   | 0 | 0 | 0.540184 | FALSE | 0 | CRNDE      | 0        | 0        |
| 645      | 1   | 0 | 0 | 0.540184 | FALSE | 0 | CRNKL1     | 0        | 0        |
| 645      | 1   | 0 | 0 | 0.540184 | FALSE | 0 | CRYBG1     | 0        | 0        |
| 645      | 1   | 0 | 0 | 0.540184 | FALSE | 0 | CRYZ       | 0        | 0        |
| 645      | 1   | 0 | 0 | 0.540184 | FALSE | 0 | CYP2C19    | 0        | 0        |
| 645      | 1   | 0 | 0 | 0.540184 | FALSE | 0 | DDC        | 0        | 0        |
| 645      | 1   | 0 | 0 | 0.540184 | FALSE | 0 | DDR1       | 0        | 0        |
| 645      | 1   | 0 | 0 | 0.540184 | FALSE | 0 | DDR2       | 0        | 0        |
| 645      | 1   | 0 | 0 | 0.540184 | FALSE | 0 | DEK        | 0        | 0        |
| 645      | 1   | 0 | 0 | 0.540184 | FALSE | 0 | DHX9       | 0        | 0        |
| 645      | 1   | 0 | 0 | 0.540184 | FALSE | 0 | DMXL1      | 0        | 0        |
| 645      | 1   | 0 | 0 | 0.540184 | FALSE | 0 | DPH1       | 0        | 0        |
| 645      | 1   | 0 | 0 | 0.540184 | FALSE | 0 | DSP        | 0        | 0        |
| 645      | 1   | 0 | 0 | 0.540184 | FALSE | 0 | DTD1       | 0        | 0        |
| 645      | 1   | 0 | 0 | 0.540184 | FALSE | 0 | DUSP6      | 0        | 0        |
| 645      | 1   | 0 | 0 | 0.540184 | FALSE | 0 | EEF1A2     | 0        | 0        |
| 645      | 1   | 0 | 0 | 0.540184 | FALSE | 0 | EID2B      | 0        | 0        |
| 645      | 1   | 0 | 0 | 0.540184 | FALSE | 0 | EMC2       | 0        | 0        |
| 645      | 1   | 0 | 0 | 0.540184 | FALSE | 0 | ENSG00000  | 0        | 0        |
| 645      | 1   | 0 | 0 | 0.540184 | FALSE | 0 | EPAS1      | 0        | 0        |
| 645      | 1   | 0 | 0 | 0.540184 | FALSE | 0 | EPHX1      | 0        | 0        |
| 645      | 1   | 0 | 0 | 0.540184 | FALSE | 0 | ERG        | 0        | 0        |
| 645      | 1   | 0 | 0 | 0.540184 | FALSE | 0 | ERLIN1     | 0        | 0        |
| 645      | 1   | 0 | 0 | 0.540184 | FALSE | 0 | ETS1       | 0        | 0        |
| 645      | 1   | 0 | 0 | 0.540184 | FALSE | 0 | ETV5       | 0        | 0        |
| 645      | 1   | 0 | 0 | 0.540184 | FALSE | 0 | EXOC4      | 0        | 0        |
| 645      | 1   | 0 | 0 | 0.540184 | FALSE | 0 | F11R       | 0        | 0        |
| 2.927959 | 583 | 0 | 0 | 0.703011 | TRUE  | 0 | hsa-miR-14 | 5.11E+08 | 0.113409 |
| 645      | 1   | 0 | 0 | 0.540184 | FALSE | 0 | FAM120A    | 0        | 0        |
| 645      | 1   | 0 | 0 | 0.540184 | FALSE | 0 | FAM20C     | 0        | 0        |
| 645      | 1   | 0 | 0 | 0.540184 | FALSE | 0 | FAM45A     | 0        | 0        |
| 645      | 1   | 0 | 0 | 0.540184 | FALSE | 0 | FAM79B     | 0        | 0        |
| 645      | 1   | 0 | 0 | 0.540184 | FALSE | 0 | FARP1      | 0        | 0        |
| 645      | 1   | 0 | 0 | 0.540184 | FALSE | 0 | FDFT1      | 0        | 0        |
| 645      | 1   | 0 | 0 | 0.540184 | FALSE | 0 | FGFBP1     | 0        | 0        |
| 645      | 1   | 0 | 0 | 0.540184 | FALSE | 0 | FOXC2      | 0        | 0        |
| 645      | 1   | 0 | 0 | 0.540184 | FALSE | 0 | FSD1L      | 0        | 0        |
| 645      | 1   | 0 | 0 | 0.540184 | FALSE | 0 | FST        | 0        | 0        |
| 645      | 1   | 0 | 0 | 0.540184 | FALSE | 0 | FUBP1      | 0        | 0        |
| 645      | 1   | 0 | 0 | 0.540184 | FALSE | 0 | FZD7       | 0        | 0        |
| 645      | 1   | 0 | 0 | 0.540184 | FALSE | 0 | GANC       | 0        | 0        |
| 645      | 1   | 0 | 0 | 0.540184 | FALSE | 0 | GLUD1      | 0        | 0        |
| 645      | 1   | 0 | 0 | 0.540184 | FALSE | 0 | GNG11      | 0        | 0        |
| 645      | 1   | 0 | 0 | 0.540184 | FALSE | 0 | GNL3       | 0        | 0        |
| 645      | 1   | 0 | 0 | 0.540184 | FALSE | 0 | GOLGB1     | 0        | 0        |
| 645      | 1   | 0 | 0 | 0.540184 | FALSE | 0 | GOLPH2     | 0        | 0        |
| 645      | 1   | 0 | 0 | 0.540184 | FALSE | 0 | GPSM2      | 0        | 0        |

|     |   |   |   |          |       |   |           |   |   |
|-----|---|---|---|----------|-------|---|-----------|---|---|
| 645 | 1 | 0 | 0 | 0.540184 | FALSE | 0 | GSC       | 0 | 0 |
| 645 | 1 | 0 | 0 | 0.540184 | FALSE | 0 | HBEGF     | 0 | 0 |
| 645 | 1 | 0 | 0 | 0.540184 | FALSE | 0 | HDAC11    | 0 | 0 |
| 645 | 1 | 0 | 0 | 0.540184 | FALSE | 0 | HELB      | 0 | 0 |
| 645 | 1 | 0 | 0 | 0.540184 | FALSE | 0 | HIST1H2BF | 0 | 0 |
| 645 | 1 | 0 | 0 | 0.540184 | FALSE | 0 | HLTF      | 0 | 0 |
| 645 | 1 | 0 | 0 | 0.540184 | FALSE | 0 | HMGA2     | 0 | 0 |
| 645 | 1 | 0 | 0 | 0.540184 | FALSE | 0 | HPS3      | 0 | 0 |
| 645 | 1 | 0 | 0 | 0.540184 | FALSE | 0 | HSPA4     | 0 | 0 |
| 645 | 1 | 0 | 0 | 0.540184 | FALSE | 0 | IFI30     | 0 | 0 |
| 645 | 1 | 0 | 0 | 0.540184 | FALSE | 0 | IFNB1     | 0 | 0 |
| 645 | 1 | 0 | 0 | 0.540184 | FALSE | 0 | IL1RN     | 0 | 0 |
| 645 | 1 | 0 | 0 | 0.540184 | FALSE | 0 | ILK       | 0 | 0 |
| 645 | 1 | 0 | 0 | 0.540184 | FALSE | 0 | IMMP2L    | 0 | 0 |
| 645 | 1 | 0 | 0 | 0.540184 | FALSE | 0 | ITGA5     | 0 | 0 |
| 645 | 1 | 0 | 0 | 0.540184 | FALSE | 0 | ITGAV     | 0 | 0 |
| 645 | 1 | 0 | 0 | 0.540184 | FALSE | 0 | KCNB2     | 0 | 0 |
| 645 | 1 | 0 | 0 | 0.540184 | FALSE | 0 | KDM3A     | 0 | 0 |
| 645 | 1 | 0 | 0 | 0.540184 | FALSE | 0 | KDM5A     | 0 | 0 |
| 645 | 1 | 0 | 0 | 0.540184 | FALSE | 0 | KIF21A    | 0 | 0 |
| 645 | 1 | 0 | 0 | 0.540184 | FALSE | 0 | KREMEN1   | 0 | 0 |
| 645 | 1 | 0 | 0 | 0.540184 | FALSE | 0 | KRT14     | 0 | 0 |
| 645 | 1 | 0 | 0 | 0.540184 | FALSE | 0 | KRT19     | 0 | 0 |
| 645 | 1 | 0 | 0 | 0.540184 | FALSE | 0 | KRT7      | 0 | 0 |
| 645 | 1 | 0 | 0 | 0.540184 | FALSE | 0 | KTN1      | 0 | 0 |
| 645 | 1 | 0 | 0 | 0.540184 | FALSE | 0 | LOC203547 | 0 | 0 |
| 645 | 1 | 0 | 0 | 0.540184 | FALSE | 0 | LOC340888 | 0 | 0 |
| 645 | 1 | 0 | 0 | 0.540184 | FALSE | 0 | LOC342705 | 0 | 0 |
| 645 | 1 | 0 | 0 | 0.540184 | FALSE | 0 | LOC400011 | 0 | 0 |
| 645 | 1 | 0 | 0 | 0.540184 | FALSE | 0 | LRRC59    | 0 | 0 |
| 645 | 1 | 0 | 0 | 0.540184 | FALSE | 0 | MAP1LC3B  | 0 | 0 |
| 645 | 1 | 0 | 0 | 0.540184 | FALSE | 0 | MAP2K4    | 0 | 0 |
| 645 | 1 | 0 | 0 | 0.540184 | FALSE | 0 | MAP2K6    | 0 | 0 |
| 645 | 1 | 0 | 0 | 0.540184 | FALSE | 0 | MAP3K11   | 0 | 0 |
| 645 | 1 | 0 | 0 | 0.540184 | FALSE | 0 | MAP3K3    | 0 | 0 |
| 645 | 1 | 0 | 0 | 0.540184 | FALSE | 0 | MAP4K2    | 0 | 0 |
| 645 | 1 | 0 | 0 | 0.540184 | FALSE | 0 | MAP4K4    | 0 | 0 |
| 645 | 1 | 0 | 0 | 0.540184 | FALSE | 0 | MAPK4     | 0 | 0 |
| 645 | 1 | 0 | 0 | 0.540184 | FALSE | 0 | MCM5      | 0 | 0 |
| 645 | 1 | 0 | 0 | 0.540184 | FALSE | 0 | MEST      | 0 | 0 |
| 645 | 1 | 0 | 0 | 0.540184 | FALSE | 0 | MIB1      | 0 | 0 |
| 645 | 1 | 0 | 0 | 0.540184 | FALSE | 0 | MIOS      | 0 | 0 |
| 645 | 1 | 0 | 0 | 0.540184 | FALSE | 0 | MMP1      | 0 | 0 |
| 645 | 1 | 0 | 0 | 0.540184 | FALSE | 0 | MMP12     | 0 | 0 |
| 645 | 1 | 0 | 0 | 0.540184 | FALSE | 0 | MMP3      | 0 | 0 |
| 645 | 1 | 0 | 0 | 0.540184 | FALSE | 0 | MSH3      | 0 | 0 |
| 645 | 1 | 0 | 0 | 0.540184 | FALSE | 0 | MST1R     | 0 | 0 |

|          |      |   |   |          |       |   |            |          |          |
|----------|------|---|---|----------|-------|---|------------|----------|----------|
| 645      | 1    | 0 | 0 | 0.540184 | FALSE | 0 | MTMR14     | 0        | 0        |
| 645      | 1    | 0 | 0 | 0.540184 | FALSE | 0 | MTR        | 0        | 0        |
| 645      | 1    | 0 | 0 | 0.540184 | FALSE | 0 | MUC1       | 0        | 0        |
| 645      | 1    | 0 | 0 | 0.540184 | FALSE | 0 | MUC19      | 0        | 0        |
| 645      | 1    | 0 | 0 | 0.540184 | FALSE | 0 | MUC4       | 0        | 0        |
| 645      | 1    | 0 | 0 | 0.540184 | FALSE | 0 | MYOCD      | 0        | 0        |
| 645      | 1    | 0 | 0 | 0.540184 | FALSE | 0 | MYOF       | 0        | 0        |
| 645      | 1    | 0 | 0 | 0.540184 | FALSE | 0 | NAIP       | 0        | 0        |
| 645      | 1    | 0 | 0 | 0.540184 | FALSE | 0 | NAP1L4     | 0        | 0        |
| 645      | 1    | 0 | 0 | 0.540184 | FALSE | 0 | NCAPD3     | 0        | 0        |
| 645      | 1    | 0 | 0 | 0.540184 | FALSE | 0 | NDRG2      | 0        | 0        |
| 645      | 1    | 0 | 0 | 0.540184 | FALSE | 0 | NDUFA4     | 0        | 0        |
| 645      | 1    | 0 | 0 | 0.540184 | FALSE | 0 | NDUFS1     | 0        | 0        |
| 645      | 1    | 0 | 0 | 0.540184 | FALSE | 0 | NDUFS2     | 0        | 0        |
| 645      | 1    | 0 | 0 | 0.540184 | FALSE | 0 | NEDD9      | 0        | 0        |
| 645      | 1    | 0 | 0 | 0.540184 | FALSE | 0 | NFIL3      | 0        | 0        |
| 645      | 1    | 0 | 0 | 0.540184 | FALSE | 0 | NHEDCI     | 0        | 0        |
| 2.018193 | 1649 | 0 | 0 | 0.76851  | TRUE  | 0 | hsa-miR-19 | 2.46E+09 | 0.059894 |
| 645      | 1    | 0 | 0 | 0.540184 | FALSE | 0 | NHSL1      | 0        | 0        |
| 645      | 1    | 0 | 0 | 0.540184 | FALSE | 0 | NOB1       | 0        | 0        |
| 645      | 1    | 0 | 0 | 0.540184 | FALSE | 0 | NODAL      | 0        | 0        |
| 645      | 1    | 0 | 0 | 0.540184 | FALSE | 0 | NOL11      | 0        | 0        |
| 645      | 1    | 0 | 0 | 0.540184 | FALSE | 0 | NOSTRIN    | 0        | 0        |
| 645      | 1    | 0 | 0 | 0.540184 | FALSE | 0 | NUDT1      | 0        | 0        |
| 645      | 1    | 0 | 0 | 0.540184 | FALSE | 0 | NUDT13     | 0        | 0        |
| 645      | 1    | 0 | 0 | 0.540184 | FALSE | 0 | NUP107     | 0        | 0        |
| 645      | 1    | 0 | 0 | 0.540184 | FALSE | 0 | P4HA1      | 0        | 0        |
| 645      | 1    | 0 | 0 | 0.540184 | FALSE | 0 | PADI1      | 0        | 0        |
| 645      | 1    | 0 | 0 | 0.540184 | FALSE | 0 | PAK1       | 0        | 0        |
| 645      | 1    | 0 | 0 | 0.540184 | FALSE | 0 | PAK4       | 0        | 0        |
| 645      | 1    | 0 | 0 | 0.540184 | FALSE | 0 | PAN2       | 0        | 0        |
| 645      | 1    | 0 | 0 | 0.540184 | FALSE | 0 | PARP8      | 0        | 0        |
| 645      | 1    | 0 | 0 | 0.540184 | FALSE | 0 | PCMTD1     | 0        | 0        |
| 645      | 1    | 0 | 0 | 0.540184 | FALSE | 0 | PCSK5      | 0        | 0        |
| 645      | 1    | 0 | 0 | 0.540184 | FALSE | 0 | PDGFD      | 0        | 0        |
| 645      | 1    | 0 | 0 | 0.540184 | FALSE | 0 | PIGF       | 0        | 0        |
| 645      | 1    | 0 | 0 | 0.540184 | FALSE | 0 | PLAT       | 0        | 0        |
| 645      | 1    | 0 | 0 | 0.540184 | FALSE | 0 | PLEK2      | 0        | 0        |
| 645      | 1    | 0 | 0 | 0.540184 | FALSE | 0 | PLXNB2     | 0        | 0        |
| 645      | 1    | 0 | 0 | 0.540184 | FALSE | 0 | PMM2       | 0        | 0        |
| 645      | 1    | 0 | 0 | 0.540184 | FALSE | 0 | PNMA3      | 0        | 0        |
| 645      | 1    | 0 | 0 | 0.540184 | FALSE | 0 | POSTN      | 0        | 0        |
| 645      | 1    | 0 | 0 | 0.540184 | FALSE | 0 | POU5F1     | 0        | 0        |
| 645      | 1    | 0 | 0 | 0.540184 | FALSE | 0 | PPP3CA     | 0        | 0        |
| 645      | 1    | 0 | 0 | 0.540184 | FALSE | 0 | PRKCA      | 0        | 0        |
| 645      | 1    | 0 | 0 | 0.540184 | FALSE | 0 | PRPF40A    | 0        | 0        |
| 645      | 1    | 0 | 0 | 0.540184 | FALSE | 0 | PSAT1      | 0        | 0        |

|     |   |   |   |          |       |   |          |   |   |
|-----|---|---|---|----------|-------|---|----------|---|---|
| 645 | 1 | 0 | 0 | 0.540184 | FALSE | 0 | PTK2     | 0 | 0 |
| 645 | 1 | 0 | 0 | 0.540184 | FALSE | 0 | PTP4A2   | 0 | 0 |
| 645 | 1 | 0 | 0 | 0.540184 | FALSE | 0 | PTRF     | 0 | 0 |
| 645 | 1 | 0 | 0 | 0.540184 | FALSE | 0 | PXN      | 0 | 0 |
| 645 | 1 | 0 | 0 | 0.540184 | FALSE | 0 | RAD50    | 0 | 0 |
| 645 | 1 | 0 | 0 | 0.540184 | FALSE | 0 | RBM18    | 0 | 0 |
| 645 | 1 | 0 | 0 | 0.540184 | FALSE | 0 | RBM6     | 0 | 0 |
| 645 | 1 | 0 | 0 | 0.540184 | FALSE | 0 | RCAN1    | 0 | 0 |
| 645 | 1 | 0 | 0 | 0.540184 | FALSE | 0 | RGS2     | 0 | 0 |
| 645 | 1 | 0 | 0 | 0.540184 | FALSE | 0 | RING1    | 0 | 0 |
| 645 | 1 | 0 | 0 | 0.540184 | FALSE | 0 | RNF169   | 0 | 0 |
| 645 | 1 | 0 | 0 | 0.540184 | FALSE | 0 | ROBO2    | 0 | 0 |
| 645 | 1 | 0 | 0 | 0.540184 | FALSE | 0 | RPA1     | 0 | 0 |
| 645 | 1 | 0 | 0 | 0.540184 | FALSE | 0 | RPL24    | 0 | 0 |
| 645 | 1 | 0 | 0 | 0.540184 | FALSE | 0 | RPS6KB1  | 0 | 0 |
| 645 | 1 | 0 | 0 | 0.540184 | FALSE | 0 | RTKN     | 0 | 0 |
| 645 | 1 | 0 | 0 | 0.540184 | FALSE | 0 | SOCS7    | 0 | 0 |
| 645 | 1 | 0 | 0 | 0.540184 | FALSE | 0 | SAMD5    | 0 | 0 |
| 645 | 1 | 0 | 0 | 0.540184 | FALSE | 0 | SASH1    | 0 | 0 |
| 645 | 1 | 0 | 0 | 0.540184 | FALSE | 0 | SENP1    | 0 | 0 |
| 645 | 1 | 0 | 0 | 0.540184 | FALSE | 0 | SH3GLB2  | 0 | 0 |
| 645 | 1 | 0 | 0 | 0.540184 | FALSE | 0 | SIN3A    | 0 | 0 |
| 645 | 1 | 0 | 0 | 0.540184 | FALSE | 0 | SIRPA    | 0 | 0 |
| 645 | 1 | 0 | 0 | 0.540184 | FALSE | 0 | SLC16A10 | 0 | 0 |
| 645 | 1 | 0 | 0 | 0.540184 | FALSE | 0 | SLC16A5  | 0 | 0 |
| 645 | 1 | 0 | 0 | 0.540184 | FALSE | 0 | SLC16A6  | 0 | 0 |
| 645 | 1 | 0 | 0 | 0.540184 | FALSE | 0 | SLC22A9  | 0 | 0 |
| 645 | 1 | 0 | 0 | 0.540184 | FALSE | 0 | SLC40A1  | 0 | 0 |
| 645 | 1 | 0 | 0 | 0.540184 | FALSE | 0 | SMIM17   | 0 | 0 |
| 645 | 1 | 0 | 0 | 0.540184 | FALSE | 0 | SNAI3    | 0 | 0 |
| 645 | 1 | 0 | 0 | 0.540184 | FALSE | 0 | SNTB1    | 0 | 0 |
| 645 | 1 | 0 | 0 | 0.540184 | FALSE | 0 | SNW1     | 0 | 0 |
| 645 | 1 | 0 | 0 | 0.540184 | FALSE | 0 | SNX24    | 0 | 0 |
| 645 | 1 | 0 | 0 | 0.540184 | FALSE | 0 | SOX10    | 0 | 0 |
| 645 | 1 | 0 | 0 | 0.540184 | FALSE | 0 | SP100    | 0 | 0 |
| 645 | 1 | 0 | 0 | 0.540184 | FALSE | 0 | SP4      | 0 | 0 |
| 645 | 1 | 0 | 0 | 0.540184 | FALSE | 0 | SP7      | 0 | 0 |
| 645 | 1 | 0 | 0 | 0.540184 | FALSE | 0 | SPARC    | 0 | 0 |
| 645 | 1 | 0 | 0 | 0.540184 | FALSE | 0 | SPTLC1   | 0 | 0 |
| 645 | 1 | 0 | 0 | 0.540184 | FALSE | 0 | SPTY2D1  | 0 | 0 |
| 645 | 1 | 0 | 0 | 0.540184 | FALSE | 0 | ST3GAL1  | 0 | 0 |
| 645 | 1 | 0 | 0 | 0.540184 | FALSE | 0 | STAU1    | 0 | 0 |
| 645 | 1 | 0 | 0 | 0.540184 | FALSE | 0 | STEAP1   | 0 | 0 |
| 645 | 1 | 0 | 0 | 0.540184 | FALSE | 0 | STK3     | 0 | 0 |
| 645 | 1 | 0 | 0 | 0.540184 | FALSE | 0 | STOM     | 0 | 0 |
| 645 | 1 | 0 | 0 | 0.540184 | FALSE | 0 | STX17    | 0 | 0 |
| 645 | 1 | 0 | 0 | 0.540184 | FALSE | 0 | SVEP1    | 0 | 0 |

|     |   |   |   |          |       |            |   |   |
|-----|---|---|---|----------|-------|------------|---|---|
| 645 | 1 | 0 | 0 | 0.540184 | FALSE | 0 SWAP70   | 0 | 0 |
| 645 | 1 | 0 | 0 | 0.540184 | FALSE | 0 TAGLN2   | 0 | 0 |
| 645 | 1 | 0 | 0 | 0.540184 | FALSE | 0 TARDBP   | 0 | 0 |
| 645 | 1 | 0 | 0 | 0.540184 | FALSE | 0 TBC1D22B | 0 | 0 |
| 645 | 1 | 0 | 0 | 0.540184 | FALSE | 0 TCF3     | 0 | 0 |
| 645 | 1 | 0 | 0 | 0.540184 | FALSE | 0 TCTN1    | 0 | 0 |
| 645 | 1 | 0 | 0 | 0.540184 | FALSE | 0 TFPI2    | 0 | 0 |
| 645 | 1 | 0 | 0 | 0.540184 | FALSE | 0 TGFB3    | 0 | 0 |
| 645 | 1 | 0 | 0 | 0.540184 | FALSE | 0 THSD7A   | 0 | 0 |
| 645 | 1 | 0 | 0 | 0.540184 | FALSE | 0 THUMPD1  | 0 | 0 |
| 645 | 1 | 0 | 0 | 0.540184 | FALSE | 0 TIPRL    | 0 | 0 |
| 645 | 1 | 0 | 0 | 0.540184 | FALSE | 0 TIRAP    | 0 | 0 |
| 645 | 1 | 0 | 0 | 0.540184 | FALSE | 0 TLR6     | 0 | 0 |
| 645 | 1 | 0 | 0 | 0.540184 | FALSE | 0 TMEM123  | 0 | 0 |
| 645 | 1 | 0 | 0 | 0.540184 | FALSE | 0 TMEM132A | 0 | 0 |
| 645 | 1 | 0 | 0 | 0.540184 | FALSE | 0 TMEM50A  | 0 | 0 |
| 645 | 1 | 0 | 0 | 0.540184 | FALSE | 0 TMOD2    | 0 | 0 |
| 645 | 1 | 0 | 0 | 0.540184 | FALSE | 0 TNC      | 0 | 0 |
| 645 | 1 | 0 | 0 | 0.540184 | FALSE | 0 TNFSF13  | 0 | 0 |
| 645 | 1 | 0 | 0 | 0.540184 | FALSE | 0 TNR      | 0 | 0 |
| 645 | 1 | 0 | 0 | 0.540184 | FALSE | 0 TP53BP1  | 0 | 0 |
| 645 | 1 | 0 | 0 | 0.540184 | FALSE | 0 TPP2     | 0 | 0 |
| 645 | 1 | 0 | 0 | 0.540184 | FALSE | 0 TPRG1    | 0 | 0 |
| 645 | 1 | 0 | 0 | 0.540184 | FALSE | 0 TRAPPC1  | 0 | 0 |
| 645 | 1 | 0 | 0 | 0.540184 | FALSE | 0 TRAPPC9  | 0 | 0 |
| 645 | 1 | 0 | 0 | 0.540184 | FALSE | 0 TRIM44   | 0 | 0 |
| 645 | 1 | 0 | 0 | 0.540184 | FALSE | 0 TUG1     | 0 | 0 |
| 645 | 1 | 0 | 0 | 0.540184 | FALSE | 0 TWIST1   | 0 | 0 |
| 645 | 1 | 0 | 0 | 0.540184 | FALSE | 0 UBE2L6   | 0 | 0 |
| 645 | 1 | 0 | 0 | 0.540184 | FALSE | 0 UBR7     | 0 | 0 |
| 645 | 1 | 0 | 0 | 0.540184 | FALSE | 0 UNC5D    | 0 | 0 |
| 645 | 1 | 0 | 0 | 0.540184 | FALSE | 0 VEZF1    | 0 | 0 |
| 645 | 1 | 0 | 0 | 0.540184 | FALSE | 0 VIM      | 0 | 0 |
| 645 | 1 | 0 | 0 | 0.540184 | FALSE | 0 VPS13A   | 0 | 0 |
| 645 | 1 | 0 | 0 | 0.540184 | FALSE | 0 VPS51    | 0 | 0 |
| 645 | 1 | 0 | 0 | 0.540184 | FALSE | 0 WASHC2C  | 0 | 0 |
| 645 | 1 | 0 | 0 | 0.540184 | FALSE | 0 WNT11    | 0 | 0 |
| 645 | 1 | 0 | 0 | 0.540184 | FALSE | 0 WNT5A    | 0 | 0 |
| 645 | 1 | 0 | 0 | 0.540184 | FALSE | 0 WNT5B    | 0 | 0 |
| 645 | 1 | 0 | 0 | 0.540184 | FALSE | 0 ZCCHC14  | 0 | 0 |
| 645 | 1 | 0 | 0 | 0.540184 | FALSE | 0 ZFAND3   | 0 | 0 |
| 645 | 1 | 0 | 0 | 0.540184 | FALSE | 0 ZNF445   | 0 | 0 |
| 645 | 1 | 0 | 0 | 0.540184 | FALSE | 0 ZNF660   | 0 | 0 |
| 593 | 1 | 0 | 0 | 0.536989 | FALSE | 0 AF086511 | 0 | 0 |
| 593 | 1 | 0 | 0 | 0.536989 | FALSE | 0 AK022044 | 0 | 0 |
| 593 | 1 | 0 | 0 | 0.536989 | FALSE | 0 AK026784 | 0 | 0 |
| 593 | 1 | 0 | 0 | 0.536989 | FALSE | 0 AK057704 | 0 | 0 |



|     |   |   |   |          |       |             |   |   |
|-----|---|---|---|----------|-------|-------------|---|---|
| 593 | 1 | 0 | 0 | 0.536989 | FALSE | 0 ALP       | 0 | 0 |
| 593 | 1 | 0 | 0 | 0.536989 | FALSE | 0 BCL2A1    | 0 | 0 |
| 593 | 1 | 0 | 0 | 0.536989 | FALSE | 0 BG547557  | 0 | 0 |
| 593 | 1 | 0 | 0 | 0.536989 | FALSE | 0 BGLAP     | 0 | 0 |
| 593 | 1 | 0 | 0 | 0.536989 | FALSE | 0 BRCA1     | 0 | 0 |
| 593 | 1 | 0 | 0 | 0.536989 | FALSE | 0 BRCA2     | 0 | 0 |
| 593 | 1 | 0 | 0 | 0.536989 | FALSE | 0 C1orf21   | 0 | 0 |
| 593 | 1 | 0 | 0 | 0.536989 | FALSE | 0 CASP7     | 0 | 0 |
| 593 | 1 | 0 | 0 | 0.536989 | FALSE | 0 CCL5      | 0 | 0 |
| 593 | 1 | 0 | 0 | 0.536989 | FALSE | 0 CCR9      | 0 | 0 |
| 593 | 1 | 0 | 0 | 0.536989 | FALSE | 0 CD40LG    | 0 | 0 |
| 593 | 1 | 0 | 0 | 0.536989 | FALSE | 0 CD80      | 0 | 0 |
| 593 | 1 | 0 | 0 | 0.536989 | FALSE | 0 CDKN3     | 0 | 0 |
| 593 | 1 | 0 | 0 | 0.536989 | FALSE | 0 CNOT6L    | 0 | 0 |
| 593 | 1 | 0 | 0 | 0.536989 | FALSE | 0 CPM       | 0 | 0 |
| 593 | 1 | 0 | 0 | 0.536989 | FALSE | 0 CPNE3     | 0 | 0 |
| 593 | 1 | 0 | 0 | 0.536989 | FALSE | 0 CXCL8     | 0 | 0 |
| 593 | 1 | 0 | 0 | 0.536989 | FALSE | 0 CXCR4     | 0 | 0 |
| 593 | 1 | 0 | 0 | 0.536989 | FALSE | 0 DNAPTP6   | 0 | 0 |
| 593 | 1 | 0 | 0 | 0.536989 | FALSE | 0 ENSG00000 | 0 | 0 |
| 593 | 1 | 0 | 0 | 0.536989 | FALSE | 0 EPSTI1    | 0 | 0 |
| 593 | 1 | 0 | 0 | 0.536989 | FALSE | 0 FADD      | 0 | 0 |
| 593 | 1 | 0 | 0 | 0.536989 | FALSE | 0 FAF1      | 0 | 0 |
| 593 | 1 | 0 | 0 | 0.536989 | FALSE | 0 FLJ10986  | 0 | 0 |
| 593 | 1 | 0 | 0 | 0.536989 | FALSE | 0 GIMAP4    | 0 | 0 |
| 593 | 1 | 0 | 0 | 0.536989 | FALSE | 0 HDAC7     | 0 | 0 |
| 593 | 1 | 0 | 0 | 0.536989 | FALSE | 0 HOXD10    | 0 | 0 |
| 593 | 1 | 0 | 0 | 0.536989 | FALSE | 0 ICAM1     | 0 | 0 |
| 593 | 1 | 0 | 0 | 0.536989 | FALSE | 0 IFI27     | 0 | 0 |
| 593 | 1 | 0 | 0 | 0.536989 | FALSE | 0 IFI44     | 0 | 0 |
| 593 | 1 | 0 | 0 | 0.536989 | FALSE | 0 IFI44L    | 0 | 0 |
| 593 | 1 | 0 | 0 | 0.536989 | FALSE | 0 IFIT5     | 0 | 0 |
| 593 | 1 | 0 | 0 | 0.536989 | FALSE | 0 IL-12p40  | 0 | 0 |
| 593 | 1 | 0 | 0 | 0.536989 | FALSE | 0 IRAK2     | 0 | 0 |
| 593 | 1 | 0 | 0 | 0.536989 | FALSE | 0 IRF7      | 0 | 0 |
| 593 | 1 | 0 | 0 | 0.536989 | FALSE | 0 IS2       | 0 | 0 |
| 593 | 1 | 0 | 0 | 0.536989 | FALSE | 0 ISG15     | 0 | 0 |
| 593 | 1 | 0 | 0 | 0.536989 | FALSE | 0 ITGB2     | 0 | 0 |
| 593 | 1 | 0 | 0 | 0.536989 | FALSE | 0 KDM2B     | 0 | 0 |
| 593 | 1 | 0 | 0 | 0.536989 | FALSE | 0 KIF22     | 0 | 0 |
| 593 | 1 | 0 | 0 | 0.536989 | FALSE | 0 L1CAM     | 0 | 0 |
| 593 | 1 | 0 | 0 | 0.536989 | FALSE | 0 LAMC2     | 0 | 0 |
| 593 | 1 | 0 | 0 | 0.536989 | FALSE | 0 LIN52     | 0 | 0 |
| 593 | 1 | 0 | 0 | 0.536989 | FALSE | 0 LINC00304 | 0 | 0 |
| 593 | 1 | 0 | 0 | 0.536989 | FALSE | 0 LMO2      | 0 | 0 |
| 593 | 1 | 0 | 0 | 0.536989 | FALSE | 0 LRP2      | 0 | 0 |
| 593 | 1 | 0 | 0 | 0.536989 | FALSE | 0 MIF       | 0 | 0 |

|     |   |   |   |          |       |              |   |   |
|-----|---|---|---|----------|-------|--------------|---|---|
| 593 | 1 | 0 | 0 | 0.536989 | FALSE | 0 MSC        | 0 | 0 |
| 593 | 1 | 0 | 0 | 0.536989 | FALSE | 0 MTUS2      | 0 | 0 |
| 593 | 1 | 0 | 0 | 0.536989 | FALSE | 0 MX2        | 0 | 0 |
| 593 | 1 | 0 | 0 | 0.536989 | FALSE | 0 NFIX       | 0 | 0 |
| 593 | 1 | 0 | 0 | 0.536989 | FALSE | 0 NUMB       | 0 | 0 |
| 593 | 1 | 0 | 0 | 0.536989 | FALSE | 0 OASL       | 0 | 0 |
| 593 | 1 | 0 | 0 | 0.536989 | FALSE | 0 OCN        | 0 | 0 |
| 593 | 1 | 0 | 0 | 0.536989 | FALSE | 0 OPN        | 0 | 0 |
| 593 | 1 | 0 | 0 | 0.536989 | FALSE | 0 OSBPL1A    | 0 | 0 |
| 593 | 1 | 0 | 0 | 0.536989 | FALSE | 0 PA2G4      | 0 | 0 |
| 593 | 1 | 0 | 0 | 0.536989 | FALSE | 0 PLaur      | 0 | 0 |
| 593 | 1 | 0 | 0 | 0.536989 | FALSE | 0 PPP1R1C    | 0 | 0 |
| 593 | 1 | 0 | 0 | 0.536989 | FALSE | 0 PTGES2     | 0 | 0 |
| 593 | 1 | 0 | 0 | 0.536989 | FALSE | 0 RAD54L     | 0 | 0 |
| 593 | 1 | 0 | 0 | 0.536989 | FALSE | 0 RAG1       | 0 | 0 |
| 593 | 1 | 0 | 0 | 0.536989 | FALSE | 0 RGS13      | 0 | 0 |
| 593 | 1 | 0 | 0 | 0.536989 | FALSE | 0 RHO        | 0 | 0 |
| 593 | 1 | 0 | 0 | 0.536989 | FALSE | 0 ROBO1      | 0 | 0 |
| 593 | 1 | 0 | 0 | 0.536989 | FALSE | 0 RSAD2      | 0 | 0 |
| 593 | 1 | 0 | 0 | 0.536989 | FALSE | 0 SAMD9L     | 0 | 0 |
| 593 | 1 | 0 | 0 | 0.536989 | FALSE | 0 SLPI       | 0 | 0 |
| 593 | 1 | 0 | 0 | 0.536989 | FALSE | 0 SMN1       | 0 | 0 |
| 593 | 1 | 0 | 0 | 0.536989 | FALSE | 0 SNTG2      | 0 | 0 |
| 593 | 1 | 0 | 0 | 0.536989 | FALSE | 0 SYT12      | 0 | 0 |
| 593 | 1 | 0 | 0 | 0.536989 | FALSE | 0 TFF3       | 0 | 0 |
| 593 | 1 | 0 | 0 | 0.536989 | FALSE | 0 THC224794  | 0 | 0 |
| 593 | 1 | 0 | 0 | 0.536989 | FALSE | 0 TMTC2      | 0 | 0 |
| 593 | 1 | 0 | 0 | 0.536989 | FALSE | 0 TRIM22     | 0 | 0 |
| 593 | 1 | 0 | 0 | 0.536989 | FALSE | 0 VWCE       | 0 | 0 |
| 593 | 1 | 0 | 0 | 0.536989 | FALSE | 0 WASF2      | 0 | 0 |
| 593 | 1 | 0 | 0 | 0.536989 | FALSE | 0 ZBTB32     | 0 | 0 |
| 593 | 1 | 0 | 0 | 0.536989 | FALSE | 0 ZDHHC13    | 0 | 0 |
| 593 | 1 | 0 | 0 | 0.536989 | FALSE | 0 ????????(P | 0 | 0 |
| 583 | 1 | 0 | 0 | 0.536375 | FALSE | 0 ASAP2      | 0 | 0 |
| 583 | 1 | 0 | 0 | 0.536375 | FALSE | 0 ATR        | 0 | 0 |
| 583 | 1 | 0 | 0 | 0.536375 | FALSE | 0 BLOC1S2    | 0 | 0 |
| 583 | 1 | 0 | 0 | 0.536375 | FALSE | 0 CARD11     | 0 | 0 |
| 583 | 1 | 0 | 0 | 0.536375 | FALSE | 0 CASR       | 0 | 0 |
| 583 | 1 | 0 | 0 | 0.536375 | FALSE | 0 CCL3       | 0 | 0 |
| 583 | 1 | 0 | 0 | 0.536375 | FALSE | 0 CD276      | 0 | 0 |
| 583 | 1 | 0 | 0 | 0.536375 | FALSE | 0 CDC42      | 0 | 0 |
| 583 | 1 | 0 | 0 | 0.536375 | FALSE | 0 CDK5RAP1   | 0 | 0 |
| 583 | 1 | 0 | 0 | 0.536375 | FALSE | 0 CENPU      | 0 | 0 |
| 583 | 1 | 0 | 0 | 0.536375 | FALSE | 0 COL4A1     | 0 | 0 |
| 583 | 1 | 0 | 0 | 0.536375 | FALSE | 0 COPS2      | 0 | 0 |
| 583 | 1 | 0 | 0 | 0.536375 | FALSE | 0 COX1       | 0 | 0 |
| 583 | 1 | 0 | 0 | 0.536375 | FALSE | 0 CSNK1E     | 0 | 0 |

|      |   |   |   |          |       |   |           |   |   |
|------|---|---|---|----------|-------|---|-----------|---|---|
| 583  | 1 | 0 | 0 | 0.536375 | FALSE | 0 | ENSG00000 | 0 | 0 |
| 583  | 1 | 0 | 0 | 0.536375 | FALSE | 0 | EXOC6B    | 0 | 0 |
| 583  | 1 | 0 | 0 | 0.536375 | FALSE | 0 | FAM98B    | 0 | 0 |
| 583  | 1 | 0 | 0 | 0.536375 | FALSE | 0 | FBXO34    | 0 | 0 |
| 583  | 1 | 0 | 0 | 0.536375 | FALSE | 0 | FLNA      | 0 | 0 |
| 583  | 1 | 0 | 0 | 0.536375 | FALSE | 0 | FZD1      | 0 | 0 |
| 583  | 1 | 0 | 0 | 0.536375 | FALSE | 0 | GRAMD1A   | 0 | 0 |
| 583  | 1 | 0 | 0 | 0.536375 | FALSE | 0 | HNRNPD    | 0 | 0 |
| 583  | 1 | 0 | 0 | 0.536375 | FALSE | 0 | HPCAL1    | 0 | 0 |
| 583  | 1 | 0 | 0 | 0.536375 | FALSE | 0 | ICE1      | 0 | 0 |
| 583  | 1 | 0 | 0 | 0.536375 | FALSE | 0 | ISCU      | 0 | 0 |
| 583  | 1 | 0 | 0 | 0.536375 | FALSE | 0 | KIAA1244  | 0 | 0 |
| 583  | 1 | 0 | 0 | 0.536375 | FALSE | 0 | LRRC36    | 0 | 0 |
| 583  | 1 | 0 | 0 | 0.536375 | FALSE | 0 | MALAT1    | 0 | 0 |
| 583  | 1 | 0 | 0 | 0.536375 | FALSE | 0 | MYH14     | 0 | 0 |
| 583  | 1 | 0 | 0 | 0.536375 | FALSE | 0 | NOVA1     | 0 | 0 |
| 583  | 1 | 0 | 0 | 0.536375 | FALSE | 0 | NSFL1C    | 0 | 0 |
| 583  | 1 | 0 | 0 | 0.536375 | FALSE | 0 | OR8U1     | 0 | 0 |
| 583  | 1 | 0 | 0 | 0.536375 | FALSE | 0 | PAX8      | 0 | 0 |
| 583  | 1 | 0 | 0 | 0.536375 | FALSE | 0 | PDGFA     | 0 | 0 |
| 583  | 1 | 0 | 0 | 0.536375 | FALSE | 0 | PGM1      | 0 | 0 |
| 583  | 1 | 0 | 0 | 0.536375 | FALSE | 0 | PHKB      | 0 | 0 |
| 583  | 1 | 0 | 0 | 0.536375 | FALSE | 0 | PLA2G4A   | 0 | 0 |
| 583  | 1 | 0 | 0 | 0.536375 | FALSE | 0 | PLS3      | 0 | 0 |
| 583  | 1 | 0 | 0 | 0.536375 | FALSE | 0 | PLSCR4    | 0 | 0 |
| 583  | 1 | 0 | 0 | 0.536375 | FALSE | 0 | POMT2     | 0 | 0 |
| 583  | 1 | 0 | 0 | 0.536375 | FALSE | 0 | PPA1      | 0 | 0 |
| 583  | 1 | 0 | 0 | 0.536375 | FALSE | 0 | RBM4      | 0 | 0 |
| 583  | 1 | 0 | 0 | 0.536375 | FALSE | 0 | RCE1      | 0 | 0 |
| 583  | 1 | 0 | 0 | 0.536375 | FALSE | 0 | RHEB      | 0 | 0 |
| 583  | 1 | 0 | 0 | 0.536375 | FALSE | 0 | RPL10A    | 0 | 0 |
| 583  | 1 | 0 | 0 | 0.536375 | FALSE | 0 | SART3     | 0 | 0 |
| 583  | 1 | 0 | 0 | 0.536375 | FALSE | 0 | SEMA7A    | 0 | 0 |
| 583  | 1 | 0 | 0 | 0.536375 | FALSE | 0 | SLC5A5    | 0 | 0 |
| 583  | 1 | 0 | 0 | 0.536375 | FALSE | 0 | TBC1D16   | 0 | 0 |
| 583  | 1 | 0 | 0 | 0.536375 | FALSE | 0 | TMEM216   | 0 | 0 |
| 583  | 1 | 0 | 0 | 0.536375 | FALSE | 0 | U2SURP    | 0 | 0 |
| 583  | 1 | 0 | 0 | 0.536375 | FALSE | 0 | USP33     | 0 | 0 |
| 583  | 1 | 0 | 0 | 0.536375 | FALSE | 0 | ZBTB40    | 0 | 0 |
| 583  | 1 | 0 | 0 | 0.536375 | FALSE | 0 | ZNF208    | 0 | 0 |
| 583  | 1 | 0 | 0 | 0.536375 | FALSE | 0 | ZNF676    | 0 | 0 |
| 583  | 1 | 0 | 0 | 0.536375 | FALSE | 0 | ZSCAN29   | 0 | 0 |
| 1649 | 1 | 0 | 0 | 0.601874 | FALSE | 0 | ABHD14B   | 0 | 0 |
| 1649 | 1 | 0 | 0 | 0.601874 | FALSE | 0 | ABHD5     | 0 | 0 |
| 1649 | 1 | 0 | 0 | 0.601874 | FALSE | 0 | ABR       | 0 | 0 |
| 1649 | 1 | 0 | 0 | 0.601874 | FALSE | 0 | ACBD5     | 0 | 0 |
| 1649 | 1 | 0 | 0 | 0.601874 | FALSE | 0 | ACP1      | 0 | 0 |

|      |   |   |   |          |       |   |          |   |   |
|------|---|---|---|----------|-------|---|----------|---|---|
| 1649 | 1 | 0 | 0 | 0.601874 | FALSE | 0 | ADARB1   | 0 | 0 |
| 1649 | 1 | 0 | 0 | 0.601874 | FALSE | 0 | ADRM1    | 0 | 0 |
| 1649 | 1 | 0 | 0 | 0.601874 | FALSE | 0 | ADSS     | 0 | 0 |
| 1649 | 1 | 0 | 0 | 0.601874 | FALSE | 0 | AGPAT5   | 0 | 0 |
| 1649 | 1 | 0 | 0 | 0.601874 | FALSE | 0 | ALCAM    | 0 | 0 |
| 1649 | 1 | 0 | 0 | 0.601874 | FALSE | 0 | ALG1     | 0 | 0 |
| 1649 | 1 | 0 | 0 | 0.601874 | FALSE | 0 | ALG2     | 0 | 0 |
| 1649 | 1 | 0 | 0 | 0.601874 | FALSE | 0 | ALOX5    | 0 | 0 |
| 1649 | 1 | 0 | 0 | 0.601874 | FALSE | 0 | AMBRA1   | 0 | 0 |
| 1649 | 1 | 0 | 0 | 0.601874 | FALSE | 0 | ANAPC16  | 0 | 0 |
| 1649 | 1 | 0 | 0 | 0.601874 | FALSE | 0 | ANAPC5   | 0 | 0 |
| 1649 | 1 | 0 | 0 | 0.601874 | FALSE | 0 | ANAPC7   | 0 | 0 |
| 1649 | 1 | 0 | 0 | 0.601874 | FALSE | 0 | ANGEL2   | 0 | 0 |
| 1649 | 1 | 0 | 0 | 0.601874 | FALSE | 0 | ANKIB1   | 0 | 0 |
| 1649 | 1 | 0 | 0 | 0.601874 | FALSE | 0 | AP1B1    | 0 | 0 |
| 1649 | 1 | 0 | 0 | 0.601874 | FALSE | 0 | AP2M1    | 0 | 0 |
| 1649 | 1 | 0 | 0 | 0.601874 | FALSE | 0 | ARC      | 0 | 0 |
| 1649 | 1 | 0 | 0 | 0.601874 | FALSE | 0 | ARFGEF1  | 0 | 0 |
| 1649 | 1 | 0 | 0 | 0.601874 | FALSE | 0 | ARHGAP19 | 0 | 0 |
| 1649 | 1 | 0 | 0 | 0.601874 | FALSE | 0 | ARHGAP35 | 0 | 0 |
| 1649 | 1 | 0 | 0 | 0.601874 | FALSE | 0 | ARHGEF12 | 0 | 0 |
| 1649 | 1 | 0 | 0 | 0.601874 | FALSE | 0 | ARHGEF18 | 0 | 0 |
| 1649 | 1 | 0 | 0 | 0.601874 | FALSE | 0 | ARHGEF26 | 0 | 0 |
| 1649 | 1 | 0 | 0 | 0.601874 | FALSE | 0 | ARIH2    | 0 | 0 |
| 1649 | 1 | 0 | 0 | 0.601874 | FALSE | 0 | ARPC1A   | 0 | 0 |
| 1649 | 1 | 0 | 0 | 0.601874 | FALSE | 0 | ARPIN    | 0 | 0 |
| 1649 | 1 | 0 | 0 | 0.601874 | FALSE | 0 | ASB7     | 0 | 0 |
| 1649 | 1 | 0 | 0 | 0.601874 | FALSE | 0 | ASNS     | 0 | 0 |
| 1649 | 1 | 0 | 0 | 0.601874 | FALSE | 0 | ATAD2B   | 0 | 0 |
| 1649 | 1 | 0 | 0 | 0.601874 | FALSE | 0 | ATF2     | 0 | 0 |
| 1649 | 1 | 0 | 0 | 0.601874 | FALSE | 0 | ATG16L1  | 0 | 0 |
| 1649 | 1 | 0 | 0 | 0.601874 | FALSE | 0 | ATG2B    | 0 | 0 |
| 1649 | 1 | 0 | 0 | 0.601874 | FALSE | 0 | ATG5     | 0 | 0 |
| 1649 | 1 | 0 | 0 | 0.601874 | FALSE | 0 | ATMIN    | 0 | 0 |
| 1649 | 1 | 0 | 0 | 0.601874 | FALSE | 0 | ATP2C1   | 0 | 0 |
| 1649 | 1 | 0 | 0 | 0.601874 | FALSE | 0 | ATP6V1B2 | 0 | 0 |
| 1649 | 1 | 0 | 0 | 0.601874 | FALSE | 0 | ATP6V1G1 | 0 | 0 |
| 1649 | 1 | 0 | 0 | 0.601874 | FALSE | 0 | ATPAF1   | 0 | 0 |
| 1649 | 1 | 0 | 0 | 0.601874 | FALSE | 0 | ATXN7L1  | 0 | 0 |
| 1649 | 1 | 0 | 0 | 0.601874 | FALSE | 0 | AUH      | 0 | 0 |
| 1649 | 1 | 0 | 0 | 0.601874 | FALSE | 0 | B3GNT5   | 0 | 0 |
| 1649 | 1 | 0 | 0 | 0.601874 | FALSE | 0 | B4GALT1  | 0 | 0 |
| 1649 | 1 | 0 | 0 | 0.601874 | FALSE | 0 | B4GALT3  | 0 | 0 |
| 1649 | 1 | 0 | 0 | 0.601874 | FALSE | 0 | B4GALT5  | 0 | 0 |
| 1649 | 1 | 0 | 0 | 0.601874 | FALSE | 0 | BAMBI    | 0 | 0 |
| 1649 | 1 | 0 | 0 | 0.601874 | FALSE | 0 | BCAS3    | 0 | 0 |
| 1649 | 1 | 0 | 0 | 0.601874 | FALSE | 0 | BCAS4    | 0 | 0 |

|      |   |   |   |          |       |   |            |   |   |
|------|---|---|---|----------|-------|---|------------|---|---|
| 1649 | 1 | 0 | 0 | 0.601874 | FALSE | 0 | BCL7A      | 0 | 0 |
| 1649 | 1 | 0 | 0 | 0.601874 | FALSE | 0 | BDKRB2     | 0 | 0 |
| 1649 | 1 | 0 | 0 | 0.601874 | FALSE | 0 | BEND3      | 0 | 0 |
| 1649 | 1 | 0 | 0 | 0.601874 | FALSE | 0 | BFAR       | 0 | 0 |
| 1649 | 1 | 0 | 0 | 0.601874 | FALSE | 0 | BID        | 0 | 0 |
| 1649 | 1 | 0 | 0 | 0.601874 | FALSE | 0 | BMPR2      | 0 | 0 |
| 1649 | 1 | 0 | 0 | 0.601874 | FALSE | 0 | BNC2       | 0 | 0 |
| 1649 | 1 | 0 | 0 | 0.601874 | FALSE | 0 | BRD1       | 0 | 0 |
| 1649 | 1 | 0 | 0 | 0.601874 | FALSE | 0 | BRD9       | 0 | 0 |
| 1649 | 1 | 0 | 0 | 0.601874 | FALSE | 0 | BROX       | 0 | 0 |
| 1649 | 1 | 0 | 0 | 0.601874 | FALSE | 0 | BTBD11     | 0 | 0 |
| 1649 | 1 | 0 | 0 | 0.601874 | FALSE | 0 | C10orf2    | 0 | 0 |
| 1649 | 1 | 0 | 0 | 0.601874 | FALSE | 0 | C11orf57   | 0 | 0 |
| 1649 | 1 | 0 | 0 | 0.601874 | FALSE | 0 | C12orf76   | 0 | 0 |
| 1649 | 1 | 0 | 0 | 0.601874 | FALSE | 0 | C14orf166  | 0 | 0 |
| 1649 | 1 | 0 | 0 | 0.601874 | FALSE | 0 | C15orf38-A | 0 | 0 |
| 1649 | 1 | 0 | 0 | 0.601874 | FALSE | 0 | C16orf70   | 0 | 0 |
| 1649 | 1 | 0 | 0 | 0.601874 | FALSE | 0 | C18orf25   | 0 | 0 |
| 1649 | 1 | 0 | 0 | 0.601874 | FALSE | 0 | C18orf54   | 0 | 0 |
| 1649 | 1 | 0 | 0 | 0.601874 | FALSE | 0 | C19orf52   | 0 | 0 |
| 1649 | 1 | 0 | 0 | 0.601874 | FALSE | 0 | C2CD2      | 0 | 0 |
| 1649 | 1 | 0 | 0 | 0.601874 | FALSE | 0 | C2orf42    | 0 | 0 |
| 1649 | 1 | 0 | 0 | 0.601874 | FALSE | 0 | C2orf69    | 0 | 0 |
| 1649 | 1 | 0 | 0 | 0.601874 | FALSE | 0 | C4orf32    | 0 | 0 |
| 1649 | 1 | 0 | 0 | 0.601874 | FALSE | 0 | C4orf33    | 0 | 0 |
| 1649 | 1 | 0 | 0 | 0.601874 | FALSE | 0 | C5orf28    | 0 | 0 |
| 1649 | 1 | 0 | 0 | 0.601874 | FALSE | 0 | C5orf30    | 0 | 0 |
| 1649 | 1 | 0 | 0 | 0.601874 | FALSE | 0 | C5orf51    | 0 | 0 |
| 1649 | 1 | 0 | 0 | 0.601874 | FALSE | 0 | C5orf56    | 0 | 0 |
| 1649 | 1 | 0 | 0 | 0.601874 | FALSE | 0 | C6orf132   | 0 | 0 |
| 1649 | 1 | 0 | 0 | 0.601874 | FALSE | 0 | C6orf136   | 0 | 0 |
| 1649 | 1 | 0 | 0 | 0.601874 | FALSE | 0 | C6orf89    | 0 | 0 |
| 1649 | 1 | 0 | 0 | 0.601874 | FALSE | 0 | C9orf69    | 0 | 0 |
| 1649 | 1 | 0 | 0 | 0.601874 | FALSE | 0 | CACNA2D1   | 0 | 0 |
| 1649 | 1 | 0 | 0 | 0.601874 | FALSE | 0 | CADM4      | 0 | 0 |
| 1649 | 1 | 0 | 0 | 0.601874 | FALSE | 0 | CALCRL     | 0 | 0 |
| 1649 | 1 | 0 | 0 | 0.601874 | FALSE | 0 | CAPRIN2    | 0 | 0 |
| 1649 | 1 | 0 | 0 | 0.601874 | FALSE | 0 | CASP10     | 0 | 0 |
| 1649 | 1 | 0 | 0 | 0.601874 | FALSE | 0 | CASZ1      | 0 | 0 |
| 1649 | 1 | 0 | 0 | 0.601874 | FALSE | 0 | CBY1       | 0 | 0 |
| 1649 | 1 | 0 | 0 | 0.601874 | FALSE | 0 | CC2D1A     | 0 | 0 |
| 1649 | 1 | 0 | 0 | 0.601874 | FALSE | 0 | CCAR2      | 0 | 0 |
| 1649 | 1 | 0 | 0 | 0.601874 | FALSE | 0 | CCDC12     | 0 | 0 |
| 1649 | 1 | 0 | 0 | 0.601874 | FALSE | 0 | CCDC126    | 0 | 0 |
| 1649 | 1 | 0 | 0 | 0.601874 | FALSE | 0 | CCDC47     | 0 | 0 |
| 1649 | 1 | 0 | 0 | 0.601874 | FALSE | 0 | CCDC82     | 0 | 0 |
| 1649 | 1 | 0 | 0 | 0.601874 | FALSE | 0 | CCM2       | 0 | 0 |

|      |   |   |   |          |       |   |          |   |   |
|------|---|---|---|----------|-------|---|----------|---|---|
| 1649 | 1 | 0 | 0 | 0.601874 | FALSE | 0 | CCNL1    | 0 | 0 |
| 1649 | 1 | 0 | 0 | 0.601874 | FALSE | 0 | CCSER2   | 0 | 0 |
| 1649 | 1 | 0 | 0 | 0.601874 | FALSE | 0 | CCT8     | 0 | 0 |
| 1649 | 1 | 0 | 0 | 0.601874 | FALSE | 0 | CD164    | 0 | 0 |
| 1649 | 1 | 0 | 0 | 0.601874 | FALSE | 0 | CD22     | 0 | 0 |
| 1649 | 1 | 0 | 0 | 0.601874 | FALSE | 0 | CDC42BPB | 0 | 0 |
| 1649 | 1 | 0 | 0 | 0.601874 | FALSE | 0 | CDK13    | 0 | 0 |
| 1649 | 1 | 0 | 0 | 0.601874 | FALSE | 0 | CDK14    | 0 | 0 |
| 1649 | 1 | 0 | 0 | 0.601874 | FALSE | 0 | CDKAL1   | 0 | 0 |
| 1649 | 1 | 0 | 0 | 0.601874 | FALSE | 0 | CDS1     | 0 | 0 |
| 1649 | 1 | 0 | 0 | 0.601874 | FALSE | 0 | CELSR1   | 0 | 0 |
| 1649 | 1 | 0 | 0 | 0.601874 | FALSE | 0 | CENPF    | 0 | 0 |
| 1649 | 1 | 0 | 0 | 0.601874 | FALSE | 0 | CENPN    | 0 | 0 |
| 1649 | 1 | 0 | 0 | 0.601874 | FALSE | 0 | CEP170   | 0 | 0 |
| 1649 | 1 | 0 | 0 | 0.601874 | FALSE | 0 | CEP55    | 0 | 0 |
| 1649 | 1 | 0 | 0 | 0.601874 | FALSE | 0 | CEP76    | 0 | 0 |
| 1649 | 1 | 0 | 0 | 0.601874 | FALSE | 0 | CERCAM   | 0 | 0 |
| 1649 | 1 | 0 | 0 | 0.601874 | FALSE | 0 | CHD2     | 0 | 0 |
| 1649 | 1 | 0 | 0 | 0.601874 | FALSE | 0 | CHEK2    | 0 | 0 |
| 1649 | 1 | 0 | 0 | 0.601874 | FALSE | 0 | CHIC1    | 0 | 0 |
| 1649 | 1 | 0 | 0 | 0.601874 | FALSE | 0 | CHM      | 0 | 0 |
| 1649 | 1 | 0 | 0 | 0.601874 | FALSE | 0 | CHURC1   | 0 | 0 |
| 1649 | 1 | 0 | 0 | 0.601874 | FALSE | 0 | CISD3    | 0 | 0 |
| 1649 | 1 | 0 | 0 | 0.601874 | FALSE | 0 | CIT      | 0 | 0 |
| 1649 | 1 | 0 | 0 | 0.601874 | FALSE | 0 | CLOCK    | 0 | 0 |
| 1649 | 1 | 0 | 0 | 0.601874 | FALSE | 0 | CLVS2    | 0 | 0 |
| 1649 | 1 | 0 | 0 | 0.601874 | FALSE | 0 | CNIH3    | 0 | 0 |
| 1649 | 1 | 0 | 0 | 0.601874 | FALSE | 0 | CNIH4    | 0 | 0 |
| 1649 | 1 | 0 | 0 | 0.601874 | FALSE | 0 | CNOT1    | 0 | 0 |
| 1649 | 1 | 0 | 0 | 0.601874 | FALSE | 0 | CNOT7    | 0 | 0 |
| 1649 | 1 | 0 | 0 | 0.601874 | FALSE | 0 | COBLL1   | 0 | 0 |
| 1649 | 1 | 0 | 0 | 0.601874 | FALSE | 0 | COG5     | 0 | 0 |
| 1649 | 1 | 0 | 0 | 0.601874 | FALSE | 0 | COL6A2   | 0 | 0 |
| 1649 | 1 | 0 | 0 | 0.601874 | FALSE | 0 | COLGALT1 | 0 | 0 |
| 1649 | 1 | 0 | 0 | 0.601874 | FALSE | 0 | COPS4    | 0 | 0 |
| 1649 | 1 | 0 | 0 | 0.601874 | FALSE | 0 | COQ10B   | 0 | 0 |
| 1649 | 1 | 0 | 0 | 0.601874 | FALSE | 0 | COX6A1   | 0 | 0 |
| 1649 | 1 | 0 | 0 | 0.601874 | FALSE | 0 | CPD      | 0 | 0 |
| 1649 | 1 | 0 | 0 | 0.601874 | FALSE | 0 | CPOX     | 0 | 0 |
| 1649 | 1 | 0 | 0 | 0.601874 | FALSE | 0 | CRCP     | 0 | 0 |
| 1649 | 1 | 0 | 0 | 0.601874 | FALSE | 0 | CREBBP   | 0 | 0 |
| 1649 | 1 | 0 | 0 | 0.601874 | FALSE | 0 | CREBL2   | 0 | 0 |
| 1649 | 1 | 0 | 0 | 0.601874 | FALSE | 0 | CSF2RB   | 0 | 0 |
| 1649 | 1 | 0 | 0 | 0.601874 | FALSE | 0 | CSMD1    | 0 | 0 |
| 1649 | 1 | 0 | 0 | 0.601874 | FALSE | 0 | CSTF2T   | 0 | 0 |
| 1649 | 1 | 0 | 0 | 0.601874 | FALSE | 0 | CTCF     | 0 | 0 |
| 1649 | 1 | 0 | 0 | 0.601874 | FALSE | 0 | CUL4A    | 0 | 0 |

|      |   |   |   |          |       |   |          |   |   |
|------|---|---|---|----------|-------|---|----------|---|---|
| 1649 | 1 | 0 | 0 | 0.601874 | FALSE | 0 | CXorf57  | 0 | 0 |
| 1649 | 1 | 0 | 0 | 0.601874 | FALSE | 0 | CXXC5    | 0 | 0 |
| 1649 | 1 | 0 | 0 | 0.601874 | FALSE | 0 | CYB561D1 | 0 | 0 |
| 1649 | 1 | 0 | 0 | 0.601874 | FALSE | 0 | CYLD     | 0 | 0 |
| 1649 | 1 | 0 | 0 | 0.601874 | FALSE | 0 | CYP2U1   | 0 | 0 |
| 1649 | 1 | 0 | 0 | 0.601874 | FALSE | 0 | CYSTM1   | 0 | 0 |
| 1649 | 1 | 0 | 0 | 0.601874 | FALSE | 0 | DAAM1    | 0 | 0 |
| 1649 | 1 | 0 | 0 | 0.601874 | FALSE | 0 | DBN1     | 0 | 0 |
| 1649 | 1 | 0 | 0 | 0.601874 | FALSE | 0 | DCAKD    | 0 | 0 |
| 1649 | 1 | 0 | 0 | 0.601874 | FALSE | 0 | DCC      | 0 | 0 |
| 1649 | 1 | 0 | 0 | 0.601874 | FALSE | 0 | DDB1     | 0 | 0 |
| 1649 | 1 | 0 | 0 | 0.601874 | FALSE | 0 | DDRGK1   | 0 | 0 |
| 1649 | 1 | 0 | 0 | 0.601874 | FALSE | 0 | DDX28    | 0 | 0 |
| 1649 | 1 | 0 | 0 | 0.601874 | FALSE | 0 | DDX3Y    | 0 | 0 |
| 1649 | 1 | 0 | 0 | 0.601874 | FALSE | 0 | DDX5     | 0 | 0 |
| 1649 | 1 | 0 | 0 | 0.601874 | FALSE | 0 | DEDD2    | 0 | 0 |
| 1649 | 1 | 0 | 0 | 0.601874 | FALSE | 0 | DENND1A  | 0 | 0 |
| 1649 | 1 | 0 | 0 | 0.601874 | FALSE | 0 | DENND6A  | 0 | 0 |
| 1649 | 1 | 0 | 0 | 0.601874 | FALSE | 0 | DEPDC1   | 0 | 0 |
| 1649 | 1 | 0 | 0 | 0.601874 | FALSE | 0 | DEPDC1B  | 0 | 0 |
| 1649 | 1 | 0 | 0 | 0.601874 | FALSE | 0 | DERL1    | 0 | 0 |
| 1649 | 1 | 0 | 0 | 0.601874 | FALSE | 0 | DESI2    | 0 | 0 |
| 1649 | 1 | 0 | 0 | 0.601874 | FALSE | 0 | DHRS3    | 0 | 0 |
| 1649 | 1 | 0 | 0 | 0.601874 | FALSE | 0 | DIP2A    | 0 | 0 |
| 1649 | 1 | 0 | 0 | 0.601874 | FALSE | 0 | DIRC2    | 0 | 0 |
| 1649 | 1 | 0 | 0 | 0.601874 | FALSE | 0 | DIS3L2   | 0 | 0 |
| 1649 | 1 | 0 | 0 | 0.601874 | FALSE | 0 | DKK1     | 0 | 0 |
| 1649 | 1 | 0 | 0 | 0.601874 | FALSE | 0 | DMXL2    | 0 | 0 |
| 1649 | 1 | 0 | 0 | 0.601874 | FALSE | 0 | DNAJA2   | 0 | 0 |
| 1649 | 1 | 0 | 0 | 0.601874 | FALSE | 0 | DNPEP    | 0 | 0 |
| 1649 | 1 | 0 | 0 | 0.601874 | FALSE | 0 | DPYSL2   | 0 | 0 |
| 1649 | 1 | 0 | 0 | 0.601874 | FALSE | 0 | DPYSL5   | 0 | 0 |
| 1649 | 1 | 0 | 0 | 0.601874 | FALSE | 0 | DROSHA   | 0 | 0 |
| 1649 | 1 | 0 | 0 | 0.601874 | FALSE | 0 | DSCR3    | 0 | 0 |
| 1649 | 1 | 0 | 0 | 0.601874 | FALSE | 0 | DSE      | 0 | 0 |
| 1649 | 1 | 0 | 0 | 0.601874 | FALSE | 0 | DSN1     | 0 | 0 |
| 1649 | 1 | 0 | 0 | 0.601874 | FALSE | 0 | DUSP5    | 0 | 0 |
| 1649 | 1 | 0 | 0 | 0.601874 | FALSE | 0 | DUSP7    | 0 | 0 |
| 1649 | 1 | 0 | 0 | 0.601874 | FALSE | 0 | DUT      | 0 | 0 |
| 1649 | 1 | 0 | 0 | 0.601874 | FALSE | 0 | DYNLL1   | 0 | 0 |
| 1649 | 1 | 0 | 0 | 0.601874 | FALSE | 0 | DYNLRB1  | 0 | 0 |
| 1649 | 1 | 0 | 0 | 0.601874 | FALSE | 0 | E2F2     | 0 | 0 |
| 1649 | 1 | 0 | 0 | 0.601874 | FALSE | 0 | ECD      | 0 | 0 |
| 1649 | 1 | 0 | 0 | 0.601874 | FALSE | 0 | ECE2     | 0 | 0 |
| 1649 | 1 | 0 | 0 | 0.601874 | FALSE | 0 | EFR3A    | 0 | 0 |
| 1649 | 1 | 0 | 0 | 0.601874 | FALSE | 0 | EHD1     | 0 | 0 |
| 1649 | 1 | 0 | 0 | 0.601874 | FALSE | 0 | EID1     | 0 | 0 |

|      |   |   |   |          |       |            |   |   |
|------|---|---|---|----------|-------|------------|---|---|
| 1649 | 1 | 0 | 0 | 0.601874 | FALSE | 0 EIF1AX   | 0 | 0 |
| 1649 | 1 | 0 | 0 | 0.601874 | FALSE | 0 ELF1     | 0 | 0 |
| 1649 | 1 | 0 | 0 | 0.601874 | FALSE | 0 ELF2     | 0 | 0 |
| 1649 | 1 | 0 | 0 | 0.601874 | FALSE | 0 ENC1     | 0 | 0 |
| 1649 | 1 | 0 | 0 | 0.601874 | FALSE | 0 ENPP4    | 0 | 0 |
| 1649 | 1 | 0 | 0 | 0.601874 | FALSE | 0 ENPP5    | 0 | 0 |
| 1649 | 1 | 0 | 0 | 0.601874 | FALSE | 0 EOGT     | 0 | 0 |
| 1649 | 1 | 0 | 0 | 0.601874 | FALSE | 0 EPDR1    | 0 | 0 |
| 1649 | 1 | 0 | 0 | 0.601874 | FALSE | 0 EPHA4    | 0 | 0 |
| 1649 | 1 | 0 | 0 | 0.601874 | FALSE | 0 EPHB4    | 0 | 0 |
| 1649 | 1 | 0 | 0 | 0.601874 | FALSE | 0 EPM2AIP1 | 0 | 0 |
| 1649 | 1 | 0 | 0 | 0.601874 | FALSE | 0 EPN2     | 0 | 0 |
| 1649 | 1 | 0 | 0 | 0.601874 | FALSE | 0 EPS15    | 0 | 0 |
| 1649 | 1 | 0 | 0 | 0.601874 | FALSE | 0 ERBB2    | 0 | 0 |
| 1649 | 1 | 0 | 0 | 0.601874 | FALSE | 0 ERCC4    | 0 | 0 |
| 1649 | 1 | 0 | 0 | 0.601874 | FALSE | 0 EREG     | 0 | 0 |
| 1649 | 1 | 0 | 0 | 0.601874 | FALSE | 0 ERLIN1   | 0 | 0 |
| 1649 | 1 | 0 | 0 | 0.601874 | FALSE | 0 ESRP2    | 0 | 0 |
| 1649 | 1 | 0 | 0 | 0.601874 | FALSE | 0 ETV3     | 0 | 0 |
| 1649 | 1 | 0 | 0 | 0.601874 | FALSE | 0 EXOC7    | 0 | 0 |
| 1649 | 1 | 0 | 0 | 0.601874 | FALSE | 0 EXOSC6   | 0 | 0 |
| 1649 | 1 | 0 | 0 | 0.601874 | FALSE | 0 EXOSC7   | 0 | 0 |
| 1649 | 1 | 0 | 0 | 0.601874 | FALSE | 0 F3       | 0 | 0 |
| 1649 | 1 | 0 | 0 | 0.601874 | FALSE | 0 FA2H     | 0 | 0 |
| 1649 | 1 | 0 | 0 | 0.601874 | FALSE | 0 FAM114A1 | 0 | 0 |
| 1649 | 1 | 0 | 0 | 0.601874 | FALSE | 0 FAM127C  | 0 | 0 |
| 1649 | 1 | 0 | 0 | 0.601874 | FALSE | 0 FAM13C   | 0 | 0 |
| 1649 | 1 | 0 | 0 | 0.601874 | FALSE | 0 FAM160B1 | 0 | 0 |
| 1649 | 1 | 0 | 0 | 0.601874 | FALSE | 0 FAM162A  | 0 | 0 |
| 1649 | 1 | 0 | 0 | 0.601874 | FALSE | 0 FAM168A  | 0 | 0 |
| 1649 | 1 | 0 | 0 | 0.601874 | FALSE | 0 FAM178A  | 0 | 0 |
| 1649 | 1 | 0 | 0 | 0.601874 | FALSE | 0 FAM179B  | 0 | 0 |
| 1649 | 1 | 0 | 0 | 0.601874 | FALSE | 0 FAM198B  | 0 | 0 |
| 1649 | 1 | 0 | 0 | 0.601874 | FALSE | 0 FAM208B  | 0 | 0 |
| 1649 | 1 | 0 | 0 | 0.601874 | FALSE | 0 FAM63B   | 0 | 0 |
| 1649 | 1 | 0 | 0 | 0.601874 | FALSE | 0 FAM83D   | 0 | 0 |
| 1649 | 1 | 0 | 0 | 0.601874 | FALSE | 0 FAM86A   | 0 | 0 |
| 1649 | 1 | 0 | 0 | 0.601874 | FALSE | 0 FANCC    | 0 | 0 |
| 1649 | 1 | 0 | 0 | 0.601874 | FALSE | 0 FASTKD5  | 0 | 0 |
| 1649 | 1 | 0 | 0 | 0.601874 | FALSE | 0 FBL      | 0 | 0 |
| 1649 | 1 | 0 | 0 | 0.601874 | FALSE | 0 FBLIM1   | 0 | 0 |
| 1649 | 1 | 0 | 0 | 0.601874 | FALSE | 0 FBRSL1   | 0 | 0 |
| 1649 | 1 | 0 | 0 | 0.601874 | FALSE | 0 FBXO10   | 0 | 0 |
| 1649 | 1 | 0 | 0 | 0.601874 | FALSE | 0 FBXO32   | 0 | 0 |
| 1649 | 1 | 0 | 0 | 0.601874 | FALSE | 0 FBXO48   | 0 | 0 |
| 1649 | 1 | 0 | 0 | 0.601874 | FALSE | 0 FBXO8    | 0 | 0 |
| 1649 | 1 | 0 | 0 | 0.601874 | FALSE | 0 FCRLA    | 0 | 0 |



|      |   |   |   |          |       |   |          |   |   |
|------|---|---|---|----------|-------|---|----------|---|---|
| 1649 | 1 | 0 | 0 | 0.601874 | FALSE | 0 | FEM1A    | 0 | 0 |
| 1649 | 1 | 0 | 0 | 0.601874 | FALSE | 0 | FEM1C    | 0 | 0 |
| 1649 | 1 | 0 | 0 | 0.601874 | FALSE | 0 | FGF7     | 0 | 0 |
| 1649 | 1 | 0 | 0 | 0.601874 | FALSE | 0 | FGFR2    | 0 | 0 |
| 1649 | 1 | 0 | 0 | 0.601874 | FALSE | 0 | FKBP15   | 0 | 0 |
| 1649 | 1 | 0 | 0 | 0.601874 | FALSE | 0 | FKBP4    | 0 | 0 |
| 1649 | 1 | 0 | 0 | 0.601874 | FALSE | 0 | FLRT2    | 0 | 0 |
| 1649 | 1 | 0 | 0 | 0.601874 | FALSE | 0 | FOXF2    | 0 | 0 |
| 1649 | 1 | 0 | 0 | 0.601874 | FALSE | 0 | FOXJ3    | 0 | 0 |
| 1649 | 1 | 0 | 0 | 0.601874 | FALSE | 0 | FOXQ1    | 0 | 0 |
| 1649 | 1 | 0 | 0 | 0.601874 | FALSE | 0 | FUT4     | 0 | 0 |
| 1649 | 1 | 0 | 0 | 0.601874 | FALSE | 0 | FZD5     | 0 | 0 |
| 1649 | 1 | 0 | 0 | 0.601874 | FALSE | 0 | G0S2     | 0 | 0 |
| 1649 | 1 | 0 | 0 | 0.601874 | FALSE | 0 | G2E3     | 0 | 0 |
| 1649 | 1 | 0 | 0 | 0.601874 | FALSE | 0 | G6PC     | 0 | 0 |
| 1649 | 1 | 0 | 0 | 0.601874 | FALSE | 0 | GAA      | 0 | 0 |
| 1649 | 1 | 0 | 0 | 0.601874 | FALSE | 0 | GAK      | 0 | 0 |
| 1649 | 1 | 0 | 0 | 0.601874 | FALSE | 0 | GCNT2    | 0 | 0 |
| 1649 | 1 | 0 | 0 | 0.601874 | FALSE | 0 | GCSH     | 0 | 0 |
| 1649 | 1 | 0 | 0 | 0.601874 | FALSE | 0 | GDNF     | 0 | 0 |
| 1649 | 1 | 0 | 0 | 0.601874 | FALSE | 0 | GEMIN7   | 0 | 0 |
| 1649 | 1 | 0 | 0 | 0.601874 | FALSE | 0 | GEMIN8   | 0 | 0 |
| 1649 | 1 | 0 | 0 | 0.601874 | FALSE | 0 | GID4     | 0 | 0 |
| 1649 | 1 | 0 | 0 | 0.601874 | FALSE | 0 | GIT2     | 0 | 0 |
| 1649 | 1 | 0 | 0 | 0.601874 | FALSE | 0 | GLCE     | 0 | 0 |
| 1649 | 1 | 0 | 0 | 0.601874 | FALSE | 0 | GLE1     | 0 | 0 |
| 1649 | 1 | 0 | 0 | 0.601874 | FALSE | 0 | GLIS2    | 0 | 0 |
| 1649 | 1 | 0 | 0 | 0.601874 | FALSE | 0 | GNAI3    | 0 | 0 |
| 1649 | 1 | 0 | 0 | 0.601874 | FALSE | 0 | GPBP1    | 0 | 0 |
| 1649 | 1 | 0 | 0 | 0.601874 | FALSE | 0 | GPR125   | 0 | 0 |
| 1649 | 1 | 0 | 0 | 0.601874 | FALSE | 0 | GPR176   | 0 | 0 |
| 1649 | 1 | 0 | 0 | 0.601874 | FALSE | 0 | GREB1    | 0 | 0 |
| 1649 | 1 | 0 | 0 | 0.601874 | FALSE | 0 | GRHL2    | 0 | 0 |
| 1649 | 1 | 0 | 0 | 0.601874 | FALSE | 0 | GRK6     | 0 | 0 |
| 1649 | 1 | 0 | 0 | 0.601874 | FALSE | 0 | GSPT1    | 0 | 0 |
| 1649 | 1 | 0 | 0 | 0.601874 | FALSE | 0 | GTF2H1   | 0 | 0 |
| 1649 | 1 | 0 | 0 | 0.601874 | FALSE | 0 | H3F3B    | 0 | 0 |
| 1649 | 1 | 0 | 0 | 0.601874 | FALSE | 0 | HADHB    | 0 | 0 |
| 1649 | 1 | 0 | 0 | 0.601874 | FALSE | 0 | HAT1     | 0 | 0 |
| 1649 | 1 | 0 | 0 | 0.601874 | FALSE | 0 | HBS1L    | 0 | 0 |
| 1649 | 1 | 0 | 0 | 0.601874 | FALSE | 0 | HCFC2    | 0 | 0 |
| 1649 | 1 | 0 | 0 | 0.601874 | FALSE | 0 | HDAC4    | 0 | 0 |
| 1649 | 1 | 0 | 0 | 0.601874 | FALSE | 0 | HDAC5    | 0 | 0 |
| 1649 | 1 | 0 | 0 | 0.601874 | FALSE | 0 | HIST2H4A | 0 | 0 |
| 1649 | 1 | 0 | 0 | 0.601874 | FALSE | 0 | HIST2H4B | 0 | 0 |
| 1649 | 1 | 0 | 0 | 0.601874 | FALSE | 0 | HMBOX1   | 0 | 0 |
| 1649 | 1 | 0 | 0 | 0.601874 | FALSE | 0 | HNRNPLL  | 0 | 0 |

|      |   |   |   |          |       |   |          |   |   |
|------|---|---|---|----------|-------|---|----------|---|---|
| 1649 | 1 | 0 | 0 | 0.601874 | FALSE | 0 | HOMER1   | 0 | 0 |
| 1649 | 1 | 0 | 0 | 0.601874 | FALSE | 0 | HOXA5    | 0 | 0 |
| 1649 | 1 | 0 | 0 | 0.601874 | FALSE | 0 | HOXB3    | 0 | 0 |
| 1649 | 1 | 0 | 0 | 0.601874 | FALSE | 0 | HOXB9    | 0 | 0 |
| 1649 | 1 | 0 | 0 | 0.601874 | FALSE | 0 | IARS     | 0 | 0 |
| 1649 | 1 | 0 | 0 | 0.601874 | FALSE | 0 | IDNK     | 0 | 0 |
| 1649 | 1 | 0 | 0 | 0.601874 | FALSE | 0 | IGF2BP3  | 0 | 0 |
| 1649 | 1 | 0 | 0 | 0.601874 | FALSE | 0 | IGFBP3   | 0 | 0 |
| 1649 | 1 | 0 | 0 | 0.601874 | FALSE | 0 | IGSF3    | 0 | 0 |
| 1649 | 1 | 0 | 0 | 0.601874 | FALSE | 0 | IL1R1    | 0 | 0 |
| 1649 | 1 | 0 | 0 | 0.601874 | FALSE | 0 | IL2RB    | 0 | 0 |
| 1649 | 1 | 0 | 0 | 0.601874 | FALSE | 0 | IMPDH1   | 0 | 0 |
| 1649 | 1 | 0 | 0 | 0.601874 | FALSE | 0 | IMPDH1P1 | 0 | 0 |
| 1649 | 1 | 0 | 0 | 0.601874 | FALSE | 0 | INF2     | 0 | 0 |
| 1649 | 1 | 0 | 0 | 0.601874 | FALSE | 0 | INHBA    | 0 | 0 |
| 1649 | 1 | 0 | 0 | 0.601874 | FALSE | 0 | INHBB    | 0 | 0 |
| 1649 | 1 | 0 | 0 | 0.601874 | FALSE | 0 | INO80    | 0 | 0 |
| 1649 | 1 | 0 | 0 | 0.601874 | FALSE | 0 | INSIG1   | 0 | 0 |
| 1649 | 1 | 0 | 0 | 0.601874 | FALSE | 0 | INTS2    | 0 | 0 |
| 1649 | 1 | 0 | 0 | 0.601874 | FALSE | 0 | IP6K1    | 0 | 0 |
| 1649 | 1 | 0 | 0 | 0.601874 | FALSE | 0 | IP6K2    | 0 | 0 |
| 1649 | 1 | 0 | 0 | 0.601874 | FALSE | 0 | IRX4     | 0 | 0 |
| 1649 | 1 | 0 | 0 | 0.601874 | FALSE | 0 | ITGA2    | 0 | 0 |
| 1649 | 1 | 0 | 0 | 0.601874 | FALSE | 0 | ITGA6    | 0 | 0 |
| 1649 | 1 | 0 | 0 | 0.601874 | FALSE | 0 | ITM2B    | 0 | 0 |
| 1649 | 1 | 0 | 0 | 0.601874 | FALSE | 0 | ITPKB    | 0 | 0 |
| 1649 | 1 | 0 | 0 | 0.601874 | FALSE | 0 | ITPR2    | 0 | 0 |
| 1649 | 1 | 0 | 0 | 0.601874 | FALSE | 0 | JMY      | 0 | 0 |
| 1649 | 1 | 0 | 0 | 0.601874 | FALSE | 0 | JUND     | 0 | 0 |
| 1649 | 1 | 0 | 0 | 0.601874 | FALSE | 0 | KAT2B    | 0 | 0 |
| 1649 | 1 | 0 | 0 | 0.601874 | FALSE | 0 | KBTBD8   | 0 | 0 |
| 1649 | 1 | 0 | 0 | 0.601874 | FALSE | 0 | KCNJ2    | 0 | 0 |
| 1649 | 1 | 0 | 0 | 0.601874 | FALSE | 0 | KCTD10   | 0 | 0 |
| 1649 | 1 | 0 | 0 | 0.601874 | FALSE | 0 | KDEL2    | 0 | 0 |
| 1649 | 1 | 0 | 0 | 0.601874 | FALSE | 0 | KDM6A    | 0 | 0 |
| 1649 | 1 | 0 | 0 | 0.601874 | FALSE | 0 | KIAA0101 | 0 | 0 |
| 1649 | 1 | 0 | 0 | 0.601874 | FALSE | 0 | KIAA0825 | 0 | 0 |
| 1649 | 1 | 0 | 0 | 0.601874 | FALSE | 0 | KIAA1279 | 0 | 0 |
| 1649 | 1 | 0 | 0 | 0.601874 | FALSE | 0 | KIAA1468 | 0 | 0 |
| 1649 | 1 | 0 | 0 | 0.601874 | FALSE | 0 | KIF26A   | 0 | 0 |
| 1649 | 1 | 0 | 0 | 0.601874 | FALSE | 0 | KITLG    | 0 | 0 |
| 1649 | 1 | 0 | 0 | 0.601874 | FALSE | 0 | KLHDC2   | 0 | 0 |
| 1649 | 1 | 0 | 0 | 0.601874 | FALSE | 0 | KLHL3    | 0 | 0 |
| 1649 | 1 | 0 | 0 | 0.601874 | FALSE | 0 | LAMP1    | 0 | 0 |
| 1649 | 1 | 0 | 0 | 0.601874 | FALSE | 0 | LAMTOR5  | 0 | 0 |
| 1649 | 1 | 0 | 0 | 0.601874 | FALSE | 0 | LCLAT1   | 0 | 0 |
| 1649 | 1 | 0 | 0 | 0.601874 | FALSE | 0 | LDLRAP1  | 0 | 0 |

|      |   |   |   |          |       |   |                      |   |   |
|------|---|---|---|----------|-------|---|----------------------|---|---|
| 1649 | 1 | 0 | 0 | 0.601874 | FALSE | 0 | LEMD3                | 0 | 0 |
| 1649 | 1 | 0 | 0 | 0.601874 | FALSE | 0 | LIF                  | 0 | 0 |
| 1649 | 1 | 0 | 0 | 0.601874 | FALSE | 0 | LMLN                 | 0 | 0 |
| 1649 | 1 | 0 | 0 | 0.601874 | FALSE | 0 | LOC613266            | 0 | 0 |
| 1649 | 1 | 0 | 0 | 0.601874 | FALSE | 0 | LONRF1               | 0 | 0 |
| 1649 | 1 | 0 | 0 | 0.601874 | FALSE | 0 | LPP                  | 0 | 0 |
| 1649 | 1 | 0 | 0 | 0.601874 | FALSE | 0 | LRBA                 | 0 | 0 |
| 1649 | 1 | 0 | 0 | 0.601874 | FALSE | 0 | LRCH1                | 0 | 0 |
| 1649 | 1 | 0 | 0 | 0.601874 | FALSE | 0 | LRCH3                | 0 | 0 |
| 1649 | 1 | 0 | 0 | 0.601874 | FALSE | 0 | LRFN5                | 0 | 0 |
| 1649 | 1 | 0 | 0 | 0.601874 | FALSE | 0 | LRP8                 | 0 | 0 |
| 1649 | 1 | 0 | 0 | 0.601874 | FALSE | 0 | LRRC8A               | 0 | 0 |
| 1649 | 1 | 0 | 0 | 0.601874 | FALSE | 0 | LRRC8B               | 0 | 0 |
| 1649 | 1 | 0 | 0 | 0.601874 | FALSE | 0 | LRRTM4               | 0 | 0 |
| 1649 | 1 | 0 | 0 | 0.601874 | FALSE | 0 | LTV1                 | 0 | 0 |
| 1649 | 1 | 0 | 0 | 0.601874 | FALSE | 0 | LY75-CD30            | 0 | 0 |
| 1649 | 1 | 0 | 0 | 0.601874 | FALSE | 0 | MALT1                | 0 | 0 |
| 1649 | 1 | 0 | 0 | 0.601874 | FALSE | 0 | MAP2K3               | 0 | 0 |
| 1649 | 1 | 0 | 0 | 0.601874 | FALSE | 0 | MAP3K1               | 0 | 0 |
| 1649 | 1 | 0 | 0 | 0.601874 | FALSE | 0 | MAP3K14              | 0 | 0 |
| 1649 | 1 | 0 | 0 | 0.601874 | FALSE | 0 | MAP4K5               | 0 | 0 |
| 1649 | 1 | 0 | 0 | 0.601874 | FALSE | 0 | MAPK8                | 0 | 0 |
| 1649 | 1 | 0 | 0 | 0.601874 | FALSE | 0 | MARK1                | 0 | 0 |
| 1649 | 1 | 0 | 0 | 0.601874 | FALSE | 0 | MAT2A                | 0 | 0 |
| 1649 | 1 | 0 | 0 | 0.601874 | FALSE | 0 | MATN3                | 0 | 0 |
| 1649 | 1 | 0 | 0 | 0.601874 | FALSE | 0 | MB21D1               | 0 | 0 |
| 1649 | 1 | 0 | 0 | 0.601874 | FALSE | 0 | MB21D2               | 0 | 0 |
| 1649 | 1 | 0 | 0 | 0.601874 | FALSE | 0 | MBNL3                | 0 | 0 |
| 1649 | 1 | 0 | 0 | 0.601874 | FALSE | 0 | MBTPS2               | 0 | 0 |
| 1649 | 1 | 0 | 0 | 0.601874 | FALSE | 0 | MCM3AP- <del>L</del> | 0 | 0 |
| 1649 | 1 | 0 | 0 | 0.601874 | FALSE | 0 | MCRIP2               | 0 | 0 |
| 1649 | 1 | 0 | 0 | 0.601874 | FALSE | 0 | MED12L               | 0 | 0 |
| 1649 | 1 | 0 | 0 | 0.601874 | FALSE | 0 | MED13L               | 0 | 0 |
| 1649 | 1 | 0 | 0 | 0.601874 | FALSE | 0 | MED21                | 0 | 0 |
| 1649 | 1 | 0 | 0 | 0.601874 | FALSE | 0 | MESDC1               | 0 | 0 |
| 1649 | 1 | 0 | 0 | 0.601874 | FALSE | 0 | MFHAS1               | 0 | 0 |
| 1649 | 1 | 0 | 0 | 0.601874 | FALSE | 0 | MFSD1                | 0 | 0 |
| 1649 | 1 | 0 | 0 | 0.601874 | FALSE | 0 | MFSD9                | 0 | 0 |
| 1649 | 1 | 0 | 0 | 0.601874 | FALSE | 0 | MICAL3               | 0 | 0 |
| 1649 | 1 | 0 | 0 | 0.601874 | FALSE | 0 | MID1IP1              | 0 | 0 |
| 1649 | 1 | 0 | 0 | 0.601874 | FALSE | 0 | MIER1                | 0 | 0 |
| 1649 | 1 | 0 | 0 | 0.601874 | FALSE | 0 | MIGA2                | 0 | 0 |
| 1649 | 1 | 0 | 0 | 0.601874 | FALSE | 0 | MLYCD                | 0 | 0 |
| 1649 | 1 | 0 | 0 | 0.601874 | FALSE | 0 | MN1                  | 0 | 0 |
| 1649 | 1 | 0 | 0 | 0.601874 | FALSE | 0 | MOSPD2               | 0 | 0 |
| 1649 | 1 | 0 | 0 | 0.601874 | FALSE | 0 | MPZL1                | 0 | 0 |
| 1649 | 1 | 0 | 0 | 0.601874 | FALSE | 0 | MREG                 | 0 | 0 |

|      |   |   |   |          |       |   |          |   |   |
|------|---|---|---|----------|-------|---|----------|---|---|
| 1649 | 1 | 0 | 0 | 0.601874 | FALSE | 0 | MRPL17   | 0 | 0 |
| 1649 | 1 | 0 | 0 | 0.601874 | FALSE | 0 | MRPS2    | 0 | 0 |
| 1649 | 1 | 0 | 0 | 0.601874 | FALSE | 0 | MST4     | 0 | 0 |
| 1649 | 1 | 0 | 0 | 0.601874 | FALSE | 0 | MTMR12   | 0 | 0 |
| 1649 | 1 | 0 | 0 | 0.601874 | FALSE | 0 | MTRNR2L8 | 0 | 0 |
| 1649 | 1 | 0 | 0 | 0.601874 | FALSE | 0 | MTRR     | 0 | 0 |
| 1649 | 1 | 0 | 0 | 0.601874 | FALSE | 0 | MTUS1    | 0 | 0 |
| 1649 | 1 | 0 | 0 | 0.601874 | FALSE | 0 | MXD1     | 0 | 0 |
| 1649 | 1 | 0 | 0 | 0.601874 | FALSE | 0 | MXRA7    | 0 | 0 |
| 1649 | 1 | 0 | 0 | 0.601874 | FALSE | 0 | MYCBP2   | 0 | 0 |
| 1649 | 1 | 0 | 0 | 0.601874 | FALSE | 0 | MZT1     | 0 | 0 |
| 1649 | 1 | 0 | 0 | 0.601874 | FALSE | 0 | N6AMT1   | 0 | 0 |
| 1649 | 1 | 0 | 0 | 0.601874 | FALSE | 0 | NAA25    | 0 | 0 |
| 1649 | 1 | 0 | 0 | 0.601874 | FALSE | 0 | NAA50    | 0 | 0 |
| 1649 | 1 | 0 | 0 | 0.601874 | FALSE | 0 | NAPB     | 0 | 0 |
| 1649 | 1 | 0 | 0 | 0.601874 | FALSE | 0 | NAV1     | 0 | 0 |
| 1649 | 1 | 0 | 0 | 0.601874 | FALSE | 0 | NCDN     | 0 | 0 |
| 1649 | 1 | 0 | 0 | 0.601874 | FALSE | 0 | NCOA4    | 0 | 0 |
| 1649 | 1 | 0 | 0 | 0.601874 | FALSE | 0 | NDFIP2   | 0 | 0 |
| 1649 | 1 | 0 | 0 | 0.601874 | FALSE | 0 | NDRG1    | 0 | 0 |
| 1649 | 1 | 0 | 0 | 0.601874 | FALSE | 0 | NDUFB2   | 0 | 0 |
| 1649 | 1 | 0 | 0 | 0.601874 | FALSE | 0 | NDUFB5   | 0 | 0 |
| 1649 | 1 | 0 | 0 | 0.601874 | FALSE | 0 | NDUFS3   | 0 | 0 |
| 1649 | 1 | 0 | 0 | 0.601874 | FALSE | 0 | NFATC2IP | 0 | 0 |
| 1649 | 1 | 0 | 0 | 0.601874 | FALSE | 0 | NFIA     | 0 | 0 |
| 1649 | 1 | 0 | 0 | 0.601874 | FALSE | 0 | NFX1     | 0 | 0 |
| 1649 | 1 | 0 | 0 | 0.601874 | FALSE | 0 | NFYA     | 0 | 0 |
| 1649 | 1 | 0 | 0 | 0.601874 | FALSE | 0 | NICN1    | 0 | 0 |
| 1649 | 1 | 0 | 0 | 0.601874 | FALSE | 0 | NIPAL2   | 0 | 0 |
| 1649 | 1 | 0 | 0 | 0.601874 | FALSE | 0 | NME4     | 0 | 0 |
| 1649 | 1 | 0 | 0 | 0.601874 | FALSE | 0 | NMT2     | 0 | 0 |
| 1649 | 1 | 0 | 0 | 0.601874 | FALSE | 0 | NOP58    | 0 | 0 |
| 1649 | 1 | 0 | 0 | 0.601874 | FALSE | 0 | NOTCH3   | 0 | 0 |
| 1649 | 1 | 0 | 0 | 0.601874 | FALSE | 0 | NPEPL1   | 0 | 0 |
| 1649 | 1 | 0 | 0 | 0.601874 | FALSE | 0 | NPTX1    | 0 | 0 |
| 1649 | 1 | 0 | 0 | 0.601874 | FALSE | 0 | NR3C2    | 0 | 0 |
| 1649 | 1 | 0 | 0 | 0.601874 | FALSE | 0 | NR4A2    | 0 | 0 |
| 1649 | 1 | 0 | 0 | 0.601874 | FALSE | 0 | NRARP    | 0 | 0 |
| 1649 | 1 | 0 | 0 | 0.601874 | FALSE | 0 | NRBP1    | 0 | 0 |
| 1649 | 1 | 0 | 0 | 0.601874 | FALSE | 0 | NRDE2    | 0 | 0 |
| 1649 | 1 | 0 | 0 | 0.601874 | FALSE | 0 | NSMAF    | 0 | 0 |
| 1649 | 1 | 0 | 0 | 0.601874 | FALSE | 0 | NT5C2    | 0 | 0 |
| 1649 | 1 | 0 | 0 | 0.601874 | FALSE | 0 | NUDT19   | 0 | 0 |
| 1649 | 1 | 0 | 0 | 0.601874 | FALSE | 0 | NUP133   | 0 | 0 |
| 1649 | 1 | 0 | 0 | 0.601874 | FALSE | 0 | NUP54    | 0 | 0 |
| 1649 | 1 | 0 | 0 | 0.601874 | FALSE | 0 | NUTF2    | 0 | 0 |
| 1649 | 1 | 0 | 0 | 0.601874 | FALSE | 0 | OCRL     | 0 | 0 |

|      |   |   |   |          |       |   |         |   |   |
|------|---|---|---|----------|-------|---|---------|---|---|
| 1649 | 1 | 0 | 0 | 0.601874 | FALSE | 0 | ODF4    | 0 | 0 |
| 1649 | 1 | 0 | 0 | 0.601874 | FALSE | 0 | OGG1    | 0 | 0 |
| 1649 | 1 | 0 | 0 | 0.601874 | FALSE | 0 | ORMDL3  | 0 | 0 |
| 1649 | 1 | 0 | 0 | 0.601874 | FALSE | 0 | OSTC    | 0 | 0 |
| 1649 | 1 | 0 | 0 | 0.601874 | FALSE | 0 | PABPC4L | 0 | 0 |
| 1649 | 1 | 0 | 0 | 0.601874 | FALSE | 0 | PAPD4   | 0 | 0 |
| 1649 | 1 | 0 | 0 | 0.601874 | FALSE | 0 | PARM1   | 0 | 0 |
| 1649 | 1 | 0 | 0 | 0.601874 | FALSE | 0 | PCDH9   | 0 | 0 |
| 1649 | 1 | 0 | 0 | 0.601874 | FALSE | 0 | PCDHA9  | 0 | 0 |
| 1649 | 1 | 0 | 0 | 0.601874 | FALSE | 0 | PCDHGB5 | 0 | 0 |
| 1649 | 1 | 0 | 0 | 0.601874 | FALSE | 0 | PCNA    | 0 | 0 |
| 1649 | 1 | 0 | 0 | 0.601874 | FALSE | 0 | PDCD6IP | 0 | 0 |
| 1649 | 1 | 0 | 0 | 0.601874 | FALSE | 0 | PDE4A   | 0 | 0 |
| 1649 | 1 | 0 | 0 | 0.601874 | FALSE | 0 | PDE7B   | 0 | 0 |
| 1649 | 1 | 0 | 0 | 0.601874 | FALSE | 0 | PDHA1   | 0 | 0 |
| 1649 | 1 | 0 | 0 | 0.601874 | FALSE | 0 | PDIA3   | 0 | 0 |
| 1649 | 1 | 0 | 0 | 0.601874 | FALSE | 0 | PDRG1   | 0 | 0 |
| 1649 | 1 | 0 | 0 | 0.601874 | FALSE | 0 | PDSS1   | 0 | 0 |
| 1649 | 1 | 0 | 0 | 0.601874 | FALSE | 0 | PFDN4   | 0 | 0 |
| 1649 | 1 | 0 | 0 | 0.601874 | FALSE | 0 | PFKFB4  | 0 | 0 |
| 1649 | 1 | 0 | 0 | 0.601874 | FALSE | 0 | PGAP2   | 0 | 0 |
| 1649 | 1 | 0 | 0 | 0.601874 | FALSE | 0 | PGR     | 0 | 0 |
| 1649 | 1 | 0 | 0 | 0.601874 | FALSE | 0 | PHACTR1 | 0 | 0 |
| 1649 | 1 | 0 | 0 | 0.601874 | FALSE | 0 | PHC3    | 0 | 0 |
| 1649 | 1 | 0 | 0 | 0.601874 | FALSE | 0 | PHF6    | 0 | 0 |
| 1649 | 1 | 0 | 0 | 0.601874 | FALSE | 0 | PHLDA1  | 0 | 0 |
| 1649 | 1 | 0 | 0 | 0.601874 | FALSE | 0 | PHLDA3  | 0 | 0 |
| 1649 | 1 | 0 | 0 | 0.601874 | FALSE | 0 | PHLPP1  | 0 | 0 |
| 1649 | 1 | 0 | 0 | 0.601874 | FALSE | 0 | PI4KA   | 0 | 0 |
| 1649 | 1 | 0 | 0 | 0.601874 | FALSE | 0 | PI4KB   | 0 | 0 |
| 1649 | 1 | 0 | 0 | 0.601874 | FALSE | 0 | PIGBOS1 | 0 | 0 |
| 1649 | 1 | 0 | 0 | 0.601874 | FALSE | 0 | PIGS    | 0 | 0 |
| 1649 | 1 | 0 | 0 | 0.601874 | FALSE | 0 | PIK3CA  | 0 | 0 |
| 1649 | 1 | 0 | 0 | 0.601874 | FALSE | 0 | PIK3R3  | 0 | 0 |
| 1649 | 1 | 0 | 0 | 0.601874 | FALSE | 0 | PIK3R5  | 0 | 0 |
| 1649 | 1 | 0 | 0 | 0.601874 | FALSE | 0 | PILRB   | 0 | 0 |
| 1649 | 1 | 0 | 0 | 0.601874 | FALSE | 0 | PKM     | 0 | 0 |
| 1649 | 1 | 0 | 0 | 0.601874 | FALSE | 0 | PLCL1   | 0 | 0 |
| 1649 | 1 | 0 | 0 | 0.601874 | FALSE | 0 | PLEKHF2 | 0 | 0 |
| 1649 | 1 | 0 | 0 | 0.601874 | FALSE | 0 | PLXNA4  | 0 | 0 |
| 1649 | 1 | 0 | 0 | 0.601874 | FALSE | 0 | PMEPA1  | 0 | 0 |
| 1649 | 1 | 0 | 0 | 0.601874 | FALSE | 0 | PML     | 0 | 0 |
| 1649 | 1 | 0 | 0 | 0.601874 | FALSE | 0 | PNRC1   | 0 | 0 |
| 1649 | 1 | 0 | 0 | 0.601874 | FALSE | 0 | POLR2A  | 0 | 0 |
| 1649 | 1 | 0 | 0 | 0.601874 | FALSE | 0 | PON2    | 0 | 0 |
| 1649 | 1 | 0 | 0 | 0.601874 | FALSE | 0 | POP7    | 0 | 0 |
| 1649 | 1 | 0 | 0 | 0.601874 | FALSE | 0 | PP7080  | 0 | 0 |

|      |   |   |   |          |       |   |          |   |   |
|------|---|---|---|----------|-------|---|----------|---|---|
| 1649 | 1 | 0 | 0 | 0.601874 | FALSE | 0 | PPARA    | 0 | 0 |
| 1649 | 1 | 0 | 0 | 0.601874 | FALSE | 0 | PPARD    | 0 | 0 |
| 1649 | 1 | 0 | 0 | 0.601874 | FALSE | 0 | PPIL1    | 0 | 0 |
| 1649 | 1 | 0 | 0 | 0.601874 | FALSE | 0 | PPM1G    | 0 | 0 |
| 1649 | 1 | 0 | 0 | 0.601874 | FALSE | 0 | PPP1R13B | 0 | 0 |
| 1649 | 1 | 0 | 0 | 0.601874 | FALSE | 0 | PPP2R1B  | 0 | 0 |
| 1649 | 1 | 0 | 0 | 0.601874 | FALSE | 0 | PPP6R1   | 0 | 0 |
| 1649 | 1 | 0 | 0 | 0.601874 | FALSE | 0 | PPP6R3   | 0 | 0 |
| 1649 | 1 | 0 | 0 | 0.601874 | FALSE | 0 | PRDM5    | 0 | 0 |
| 1649 | 1 | 0 | 0 | 0.601874 | FALSE | 0 | PRKAR2A  | 0 | 0 |
| 1649 | 1 | 0 | 0 | 0.601874 | FALSE | 0 | PRK CZ   | 0 | 0 |
| 1649 | 1 | 0 | 0 | 0.601874 | FALSE | 0 | PRKD3    | 0 | 0 |
| 1649 | 1 | 0 | 0 | 0.601874 | FALSE | 0 | PRKN     | 0 | 0 |
| 1649 | 1 | 0 | 0 | 0.601874 | FALSE | 0 | PRKRIR   | 0 | 0 |
| 1649 | 1 | 0 | 0 | 0.601874 | FALSE | 0 | PRMT5    | 0 | 0 |
| 1649 | 1 | 0 | 0 | 0.601874 | FALSE | 0 | PRR5L    | 0 | 0 |
| 1649 | 1 | 0 | 0 | 0.601874 | FALSE | 0 | PRRT3    | 0 | 0 |
| 1649 | 1 | 0 | 0 | 0.601874 | FALSE | 0 | PRTG     | 0 | 0 |
| 1649 | 1 | 0 | 0 | 0.601874 | FALSE | 0 | PSMA6    | 0 | 0 |
| 1649 | 1 | 0 | 0 | 0.601874 | FALSE | 0 | PTBP2    | 0 | 0 |
| 1649 | 1 | 0 | 0 | 0.601874 | FALSE | 0 | PTGES3   | 0 | 0 |
| 1649 | 1 | 0 | 0 | 0.601874 | FALSE | 0 | PTPRB    | 0 | 0 |
| 1649 | 1 | 0 | 0 | 0.601874 | FALSE | 0 | PTPRC    | 0 | 0 |
| 1649 | 1 | 0 | 0 | 0.601874 | FALSE | 0 | PTPRG    | 0 | 0 |
| 1649 | 1 | 0 | 0 | 0.601874 | FALSE | 0 | PURG     | 0 | 0 |
| 1649 | 1 | 0 | 0 | 0.601874 | FALSE | 0 | RAB13    | 0 | 0 |
| 1649 | 1 | 0 | 0 | 0.601874 | FALSE | 0 | RAB23    | 0 | 0 |
| 1649 | 1 | 0 | 0 | 0.601874 | FALSE | 0 | RAB2A    | 0 | 0 |
| 1649 | 1 | 0 | 0 | 0.601874 | FALSE | 0 | RAB5B    | 0 | 0 |
| 1649 | 1 | 0 | 0 | 0.601874 | FALSE | 0 | RABGGTB  | 0 | 0 |
| 1649 | 1 | 0 | 0 | 0.601874 | FALSE | 0 | RAD51B   | 0 | 0 |
| 1649 | 1 | 0 | 0 | 0.601874 | FALSE | 0 | RAF1     | 0 | 0 |
| 1649 | 1 | 0 | 0 | 0.601874 | FALSE | 0 | RAP1GAP2 | 0 | 0 |
| 1649 | 1 | 0 | 0 | 0.601874 | FALSE | 0 | RAPGEF2  | 0 | 0 |
| 1649 | 1 | 0 | 0 | 0.601874 | FALSE | 0 | RAPGEF4  | 0 | 0 |
| 1649 | 1 | 0 | 0 | 0.601874 | FALSE | 0 | RASEF    | 0 | 0 |
| 1649 | 1 | 0 | 0 | 0.601874 | FALSE | 0 | RASSF2   | 0 | 0 |
| 1649 | 1 | 0 | 0 | 0.601874 | FALSE | 0 | RBM20    | 0 | 0 |
| 1649 | 1 | 0 | 0 | 0.601874 | FALSE | 0 | RC3H1    | 0 | 0 |
| 1649 | 1 | 0 | 0 | 0.601874 | FALSE | 0 | RCAN3    | 0 | 0 |
| 1649 | 1 | 0 | 0 | 0.601874 | FALSE | 0 | RCHY1    | 0 | 0 |
| 1649 | 1 | 0 | 0 | 0.601874 | FALSE | 0 | RDX      | 0 | 0 |
| 1649 | 1 | 0 | 0 | 0.601874 | FALSE | 0 | RERE     | 0 | 0 |
| 1649 | 1 | 0 | 0 | 0.601874 | FALSE | 0 | RHOT2    | 0 | 0 |
| 1649 | 1 | 0 | 0 | 0.601874 | FALSE | 0 | RNF145   | 0 | 0 |
| 1649 | 1 | 0 | 0 | 0.601874 | FALSE | 0 | RNF165   | 0 | 0 |
| 1649 | 1 | 0 | 0 | 0.601874 | FALSE | 0 | RNF167   | 0 | 0 |

|      |   |   |   |          |       |   |          |   |   |
|------|---|---|---|----------|-------|---|----------|---|---|
| 1649 | 1 | 0 | 0 | 0.601874 | FALSE | 0 | RNF220   | 0 | 0 |
| 1649 | 1 | 0 | 0 | 0.601874 | FALSE | 0 | RNF4     | 0 | 0 |
| 1649 | 1 | 0 | 0 | 0.601874 | FALSE | 0 | RNF6     | 0 | 0 |
| 1649 | 1 | 0 | 0 | 0.601874 | FALSE | 0 | RPAP2    | 0 | 0 |
| 1649 | 1 | 0 | 0 | 0.601874 | FALSE | 0 | RPF2     | 0 | 0 |
| 1649 | 1 | 0 | 0 | 0.601874 | FALSE | 0 | RPL4     | 0 | 0 |
| 1649 | 1 | 0 | 0 | 0.601874 | FALSE | 0 | RPS13    | 0 | 0 |
| 1649 | 1 | 0 | 0 | 0.601874 | FALSE | 0 | RPS29    | 0 | 0 |
| 1649 | 1 | 0 | 0 | 0.601874 | FALSE | 0 | RPS4Y1   | 0 | 0 |
| 1649 | 1 | 0 | 0 | 0.601874 | FALSE | 0 | RQCD1    | 0 | 0 |
| 1649 | 1 | 0 | 0 | 0.601874 | FALSE | 0 | RRAS2    | 0 | 0 |
| 1649 | 1 | 0 | 0 | 0.601874 | FALSE | 0 | RYR2     | 0 | 0 |
| 1649 | 1 | 0 | 0 | 0.601874 | FALSE | 0 | S1PR1    | 0 | 0 |
| 1649 | 1 | 0 | 0 | 0.601874 | FALSE | 0 | SAAL1    | 0 | 0 |
| 1649 | 1 | 0 | 0 | 0.601874 | FALSE | 0 | SALL1    | 0 | 0 |
| 1649 | 1 | 0 | 0 | 0.601874 | FALSE | 0 | SAMD12   | 0 | 0 |
| 1649 | 1 | 0 | 0 | 0.601874 | FALSE | 0 | SAMHD1   | 0 | 0 |
| 1649 | 1 | 0 | 0 | 0.601874 | FALSE | 0 | SAR1B    | 0 | 0 |
| 1649 | 1 | 0 | 0 | 0.601874 | FALSE | 0 | SATB1    | 0 | 0 |
| 1649 | 1 | 0 | 0 | 0.601874 | FALSE | 0 | SBF2     | 0 | 0 |
| 1649 | 1 | 0 | 0 | 0.601874 | FALSE | 0 | SCARA3   | 0 | 0 |
| 1649 | 1 | 0 | 0 | 0.601874 | FALSE | 0 | SDAD1    | 0 | 0 |
| 1649 | 1 | 0 | 0 | 0.601874 | FALSE | 0 | SEC11A   | 0 | 0 |
| 1649 | 1 | 0 | 0 | 0.601874 | FALSE | 0 | SEC13    | 0 | 0 |
| 1649 | 1 | 0 | 0 | 0.601874 | FALSE | 0 | SEC24D   | 0 | 0 |
| 1649 | 1 | 0 | 0 | 0.601874 | FALSE | 0 | SEMA4C   | 0 | 0 |
| 1649 | 1 | 0 | 0 | 0.601874 | FALSE | 0 | SEPHS2   | 0 | 0 |
| 1649 | 1 | 0 | 0 | 0.601874 | FALSE | 0 | SERPINE2 | 0 | 0 |
| 1649 | 1 | 0 | 0 | 0.601874 | FALSE | 0 | SF3A1    | 0 | 0 |
| 1649 | 1 | 0 | 0 | 0.601874 | FALSE | 0 | SF3B1    | 0 | 0 |
| 1649 | 1 | 0 | 0 | 0.601874 | FALSE | 0 | SFTPA1   | 0 | 0 |
| 1649 | 1 | 0 | 0 | 0.601874 | FALSE | 0 | SGK1     | 0 | 0 |
| 1649 | 1 | 0 | 0 | 0.601874 | FALSE | 0 | SH2D3C   | 0 | 0 |
| 1649 | 1 | 0 | 0 | 0.601874 | FALSE | 0 | SH3BP5L  | 0 | 0 |
| 1649 | 1 | 0 | 0 | 0.601874 | FALSE | 0 | SIM2     | 0 | 0 |
| 1649 | 1 | 0 | 0 | 0.601874 | FALSE | 0 | SIN3B    | 0 | 0 |
| 1649 | 1 | 0 | 0 | 0.601874 | FALSE | 0 | SIPA1L2  | 0 | 0 |
| 1649 | 1 | 0 | 0 | 0.601874 | FALSE | 0 | SIVA1    | 0 | 0 |
| 1649 | 1 | 0 | 0 | 0.601874 | FALSE | 0 | SKIDA1   | 0 | 0 |
| 1649 | 1 | 0 | 0 | 0.601874 | FALSE | 0 | SLAIN1   | 0 | 0 |
| 1649 | 1 | 0 | 0 | 0.601874 | FALSE | 0 | SLC12A7  | 0 | 0 |
| 1649 | 1 | 0 | 0 | 0.601874 | FALSE | 0 | SLC25A12 | 0 | 0 |
| 1649 | 1 | 0 | 0 | 0.601874 | FALSE | 0 | SLC25A24 | 0 | 0 |
| 1649 | 1 | 0 | 0 | 0.601874 | FALSE | 0 | SLC25A6  | 0 | 0 |
| 1649 | 1 | 0 | 0 | 0.601874 | FALSE | 0 | SLC31A2  | 0 | 0 |
| 1649 | 1 | 0 | 0 | 0.601874 | FALSE | 0 | SLC35D1  | 0 | 0 |
| 1649 | 1 | 0 | 0 | 0.601874 | FALSE | 0 | SLC35F1  | 0 | 0 |

|      |   |   |   |          |       |   |           |   |   |
|------|---|---|---|----------|-------|---|-----------|---|---|
| 1649 | 1 | 0 | 0 | 0.601874 | FALSE | 0 | SLC36A1   | 0 | 0 |
| 1649 | 1 | 0 | 0 | 0.601874 | FALSE | 0 | SLC37A1   | 0 | 0 |
| 1649 | 1 | 0 | 0 | 0.601874 | FALSE | 0 | SLC39A4   | 0 | 0 |
| 1649 | 1 | 0 | 0 | 0.601874 | FALSE | 0 | SLC39A8   | 0 | 0 |
| 1649 | 1 | 0 | 0 | 0.601874 | FALSE | 0 | SLC46A1   | 0 | 0 |
| 1649 | 1 | 0 | 0 | 0.601874 | FALSE | 0 | SLC48A1   | 0 | 0 |
| 1649 | 1 | 0 | 0 | 0.601874 | FALSE | 0 | SLC6A11   | 0 | 0 |
| 1649 | 1 | 0 | 0 | 0.601874 | FALSE | 0 | SLC6A6    | 0 | 0 |
| 1649 | 1 | 0 | 0 | 0.601874 | FALSE | 0 | SLC7A11   | 0 | 0 |
| 1649 | 1 | 0 | 0 | 0.601874 | FALSE | 0 | SLC9A2    | 0 | 0 |
| 1649 | 1 | 0 | 0 | 0.601874 | FALSE | 0 | SLC9A6    | 0 | 0 |
| 1649 | 1 | 0 | 0 | 0.601874 | FALSE | 0 | SLMAP     | 0 | 0 |
| 1649 | 1 | 0 | 0 | 0.601874 | FALSE | 0 | SMAP1     | 0 | 0 |
| 1649 | 1 | 0 | 0 | 0.601874 | FALSE | 0 | SMARCA2   | 0 | 0 |
| 1649 | 1 | 0 | 0 | 0.601874 | FALSE | 0 | SMCHD1    | 0 | 0 |
| 1649 | 1 | 0 | 0 | 0.601874 | FALSE | 0 | SMEK1     | 0 | 0 |
| 1649 | 1 | 0 | 0 | 0.601874 | FALSE | 0 | SMG1      | 0 | 0 |
| 1649 | 1 | 0 | 0 | 0.601874 | FALSE | 0 | SMOC1     | 0 | 0 |
| 1649 | 1 | 0 | 0 | 0.601874 | FALSE | 0 | SNPH      | 0 | 0 |
| 1649 | 1 | 0 | 0 | 0.601874 | FALSE | 0 | SNX3      | 0 | 0 |
| 1649 | 1 | 0 | 0 | 0.601874 | FALSE | 0 | SNX4      | 0 | 0 |
| 1649 | 1 | 0 | 0 | 0.601874 | FALSE | 0 | SNX5      | 0 | 0 |
| 1649 | 1 | 0 | 0 | 0.601874 | FALSE | 0 | SOCS1     | 0 | 0 |
| 1649 | 1 | 0 | 0 | 0.601874 | FALSE | 0 | SOCS3     | 0 | 0 |
| 1649 | 1 | 0 | 0 | 0.601874 | FALSE | 0 | SOCS5     | 0 | 0 |
| 1649 | 1 | 0 | 0 | 0.601874 | FALSE | 0 | SOX12     | 0 | 0 |
| 1649 | 1 | 0 | 0 | 0.601874 | FALSE | 0 | SOX6      | 0 | 0 |
| 1649 | 1 | 0 | 0 | 0.601874 | FALSE | 0 | SPART     | 0 | 0 |
| 1649 | 1 | 0 | 0 | 0.601874 | FALSE | 0 | SPRED2    | 0 | 0 |
| 1649 | 1 | 0 | 0 | 0.601874 | FALSE | 0 | SPTSSB    | 0 | 0 |
| 1649 | 1 | 0 | 0 | 0.601874 | FALSE | 0 | SRP54     | 0 | 0 |
| 1649 | 1 | 0 | 0 | 0.601874 | FALSE | 0 | SRPK2     | 0 | 0 |
| 1649 | 1 | 0 | 0 | 0.601874 | FALSE | 0 | SRSF4     | 0 | 0 |
| 1649 | 1 | 0 | 0 | 0.601874 | FALSE | 0 | SRSF6     | 0 | 0 |
| 1649 | 1 | 0 | 0 | 0.601874 | FALSE | 0 | ST3GAL5   | 0 | 0 |
| 1649 | 1 | 0 | 0 | 0.601874 | FALSE | 0 | ST6GALNAI | 0 | 0 |
| 1649 | 1 | 0 | 0 | 0.601874 | FALSE | 0 | ST7       | 0 | 0 |
| 1649 | 1 | 0 | 0 | 0.601874 | FALSE | 0 | STK24     | 0 | 0 |
| 1649 | 1 | 0 | 0 | 0.601874 | FALSE | 0 | STX11     | 0 | 0 |
| 1649 | 1 | 0 | 0 | 0.601874 | FALSE | 0 | STX6      | 0 | 0 |
| 1649 | 1 | 0 | 0 | 0.601874 | FALSE | 0 | SUCLA2    | 0 | 0 |
| 1649 | 1 | 0 | 0 | 0.601874 | FALSE | 0 | SUCO      | 0 | 0 |
| 1649 | 1 | 0 | 0 | 0.601874 | FALSE | 0 | SYBU      | 0 | 0 |
| 1649 | 1 | 0 | 0 | 0.601874 | FALSE | 0 | SYDE1     | 0 | 0 |
| 1649 | 1 | 0 | 0 | 0.601874 | FALSE | 0 | SYN2      | 0 | 0 |
| 1649 | 1 | 0 | 0 | 0.601874 | FALSE | 0 | TAF4      | 0 | 0 |
| 1649 | 1 | 0 | 0 | 0.601874 | FALSE | 0 | TARS2     | 0 | 0 |



|          |    |   |   |          |       |   |                     |          |   |
|----------|----|---|---|----------|-------|---|---------------------|----------|---|
| 1649     | 1  | 0 | 0 | 0.601874 | FALSE | 0 | TBC1D10B            | 0        | 0 |
| 1649     | 1  | 0 | 0 | 0.601874 | FALSE | 0 | TBC1D25             | 0        | 0 |
| 1649     | 1  | 0 | 0 | 0.601874 | FALSE | 0 | TBC1D4              | 0        | 0 |
| 1649     | 1  | 0 | 0 | 0.601874 | FALSE | 0 | TCEB3               | 0        | 0 |
| 1649     | 1  | 0 | 0 | 0.601874 | FALSE | 0 | TDGF1               | 0        | 0 |
| 1649     | 1  | 0 | 0 | 0.601874 | FALSE | 0 | TF                  | 0        | 0 |
| 1649     | 1  | 0 | 0 | 0.601874 | FALSE | 0 | TFB1M               | 0        | 0 |
| 1649     | 1  | 0 | 0 | 0.601874 | FALSE | 0 | TGFBRAP1            | 0        | 0 |
| 1649     | 1  | 0 | 0 | 0.601874 | FALSE | 0 | TIMM23              | 0        | 0 |
| 1649     | 1  | 0 | 0 | 0.601874 | FALSE | 0 | TIPARP              | 0        | 0 |
| 1649     | 1  | 0 | 0 | 0.601874 | FALSE | 0 | TJAP1               | 0        | 0 |
| 1649     | 1  | 0 | 0 | 0.601874 | FALSE | 0 | TK2                 | 0        | 0 |
| 1649     | 1  | 0 | 0 | 0.601874 | FALSE | 0 | TLR10               | 0        | 0 |
| 1649     | 1  | 0 | 0 | 0.601874 | FALSE | 0 | TLR7                | 0        | 0 |
| 1649     | 1  | 0 | 0 | 0.601874 | FALSE | 0 | TMEM117             | 0        | 0 |
| 1649     | 1  | 0 | 0 | 0.601874 | FALSE | 0 | TMEM132F            | 0        | 0 |
| 1649     | 1  | 0 | 0 | 0.601874 | FALSE | 0 | TMEM138             | 0        | 0 |
| 1649     | 1  | 0 | 0 | 0.601874 | FALSE | 0 | TMEM159             | 0        | 0 |
| 1649     | 1  | 0 | 0 | 0.601874 | FALSE | 0 | TMEM167B            | 0        | 0 |
| 1649     | 1  | 0 | 0 | 0.601874 | FALSE | 0 | TMEM2               | 0        | 0 |
| 1649     | 1  | 0 | 0 | 0.601874 | FALSE | 0 | TMEM203             | 0        | 0 |
| 1649     | 1  | 0 | 0 | 0.601874 | FALSE | 0 | TMEM25              | 0        | 0 |
| 1649     | 1  | 0 | 0 | 0.601874 | FALSE | 0 | TMEM45A             | 0        | 0 |
| 1649     | 1  | 0 | 0 | 0.601874 | FALSE | 0 | TMEM87B             | 0        | 0 |
| 2.159091 | 88 | 0 | 0 | 0.670568 | TRUE  | 0 | hsa-miR-33 14852510 | 0.072443 |   |
| 1649     | 1  | 0 | 0 | 0.601874 | FALSE | 0 | TMTC1               | 0        | 0 |
| 1649     | 1  | 0 | 0 | 0.601874 | FALSE | 0 | TMX4                | 0        | 0 |
| 1649     | 1  | 0 | 0 | 0.601874 | FALSE | 0 | TNFRSF11A           | 0        | 0 |
| 1649     | 1  | 0 | 0 | 0.601874 | FALSE | 0 | TNFRSF12A           | 0        | 0 |
| 1649     | 1  | 0 | 0 | 0.601874 | FALSE | 0 | TNFRSF1A            | 0        | 0 |
| 1649     | 1  | 0 | 0 | 0.601874 | FALSE | 0 | TNFRSF1B            | 0        | 0 |
| 1649     | 1  | 0 | 0 | 0.601874 | FALSE | 0 | TOMM22              | 0        | 0 |
| 1649     | 1  | 0 | 0 | 0.601874 | FALSE | 0 | TOPBP1              | 0        | 0 |
| 1649     | 1  | 0 | 0 | 0.601874 | FALSE | 0 | TPM4                | 0        | 0 |
| 1649     | 1  | 0 | 0 | 0.601874 | FALSE | 0 | TRAPPC10            | 0        | 0 |
| 1649     | 1  | 0 | 0 | 0.601874 | FALSE | 0 | TRIM11              | 0        | 0 |
| 1649     | 1  | 0 | 0 | 0.601874 | FALSE | 0 | TRIM39              | 0        | 0 |
| 1649     | 1  | 0 | 0 | 0.601874 | FALSE | 0 | TRPC3               | 0        | 0 |
| 1649     | 1  | 0 | 0 | 0.601874 | FALSE | 0 | TRPM7               | 0        | 0 |
| 1649     | 1  | 0 | 0 | 0.601874 | FALSE | 0 | TSHZ3               | 0        | 0 |
| 1649     | 1  | 0 | 0 | 0.601874 | FALSE | 0 | TSR1                | 0        | 0 |
| 1649     | 1  | 0 | 0 | 0.601874 | FALSE | 0 | TTC5                | 0        | 0 |
| 1649     | 1  | 0 | 0 | 0.601874 | FALSE | 0 | TTC9                | 0        | 0 |
| 1649     | 1  | 0 | 0 | 0.601874 | FALSE | 0 | TTF2                | 0        | 0 |
| 1649     | 1  | 0 | 0 | 0.601874 | FALSE | 0 | TUB                 | 0        | 0 |
| 1649     | 1  | 0 | 0 | 0.601874 | FALSE | 0 | TWF1                | 0        | 0 |
| 1649     | 1  | 0 | 0 | 0.601874 | FALSE | 0 | TWIST2              | 0        | 0 |

|          |     |   |   |          |       |   |            |          |          |
|----------|-----|---|---|----------|-------|---|------------|----------|----------|
| 1649     | 1   | 0 | 0 | 0.601874 | FALSE | 0 | TXLNA      | 0        | 0        |
| 1649     | 1   | 0 | 0 | 0.601874 | FALSE | 0 | UACA       | 0        | 0        |
| 1649     | 1   | 0 | 0 | 0.601874 | FALSE | 0 | UBE2K      | 0        | 0        |
| 1649     | 1   | 0 | 0 | 0.601874 | FALSE | 0 | UBE2Q2     | 0        | 0        |
| 1649     | 1   | 0 | 0 | 0.601874 | FALSE | 0 | UBE3D      | 0        | 0        |
| 1649     | 1   | 0 | 0 | 0.601874 | FALSE | 0 | UCHL1      | 0        | 0        |
| 1649     | 1   | 0 | 0 | 0.601874 | FALSE | 0 | URGCP-MR   | 0        | 0        |
| 1649     | 1   | 0 | 0 | 0.601874 | FALSE | 0 | USP13      | 0        | 0        |
| 1649     | 1   | 0 | 0 | 0.601874 | FALSE | 0 | USP14      | 0        | 0        |
| 1649     | 1   | 0 | 0 | 0.601874 | FALSE | 0 | VAMP1      | 0        | 0        |
| 1649     | 1   | 0 | 0 | 0.601874 | FALSE | 0 | VCPIP1     | 0        | 0        |
| 1649     | 1   | 0 | 0 | 0.601874 | FALSE | 0 | VMP1       | 0        | 0        |
| 1649     | 1   | 0 | 0 | 0.601874 | FALSE | 0 | VPS29      | 0        | 0        |
| 1649     | 1   | 0 | 0 | 0.601874 | FALSE | 0 | VPS37A     | 0        | 0        |
| 1649     | 1   | 0 | 0 | 0.601874 | FALSE | 0 | VPS39      | 0        | 0        |
| 1649     | 1   | 0 | 0 | 0.601874 | FALSE | 0 | VPS4B      | 0        | 0        |
| 1649     | 1   | 0 | 0 | 0.601874 | FALSE | 0 | VTI1A      | 0        | 0        |
| 1649     | 1   | 0 | 0 | 0.601874 | FALSE | 0 | WARS       | 0        | 0        |
| 1649     | 1   | 0 | 0 | 0.601874 | FALSE | 0 | WBP1L      | 0        | 0        |
| 1649     | 1   | 0 | 0 | 0.601874 | FALSE | 0 | WBP4       | 0        | 0        |
| 1649     | 1   | 0 | 0 | 0.601874 | FALSE | 0 | WDFY3      | 0        | 0        |
| 1649     | 1   | 0 | 0 | 0.601874 | FALSE | 0 | WDR1       | 0        | 0        |
| 2.216769 | 489 | 0 | 0 | 0.697235 | TRUE  | 0 | hsa-miR-34 | 3.66E+08 | 0.071575 |
| 1649     | 1   | 0 | 0 | 0.601874 | FALSE | 0 | WDR18      | 0        | 0        |
| 1649     | 1   | 0 | 0 | 0.601874 | FALSE | 0 | WDR20      | 0        | 0        |
| 1649     | 1   | 0 | 0 | 0.601874 | FALSE | 0 | WDR26      | 0        | 0        |
| 1649     | 1   | 0 | 0 | 0.601874 | FALSE | 0 | WDR44      | 0        | 0        |
| 1649     | 1   | 0 | 0 | 0.601874 | FALSE | 0 | WDR45B     | 0        | 0        |
| 1649     | 1   | 0 | 0 | 0.601874 | FALSE | 0 | WNK3       | 0        | 0        |
| 1649     | 1   | 0 | 0 | 0.601874 | FALSE | 0 | WNT10A     | 0        | 0        |
| 1649     | 1   | 0 | 0 | 0.601874 | FALSE | 0 | WNT3       | 0        | 0        |
| 1649     | 1   | 0 | 0 | 0.601874 | FALSE | 0 | WNT7B      | 0        | 0        |
| 1649     | 1   | 0 | 0 | 0.601874 | FALSE | 0 | WWTR1      | 0        | 0        |
| 1649     | 1   | 0 | 0 | 0.601874 | FALSE | 0 | XDH        | 0        | 0        |
| 1649     | 1   | 0 | 0 | 0.601874 | FALSE | 0 | XPO1       | 0        | 0        |
| 1649     | 1   | 0 | 0 | 0.601874 | FALSE | 0 | YAF2       | 0        | 0        |
| 1649     | 1   | 0 | 0 | 0.601874 | FALSE | 0 | YBX1       | 0        | 0        |
| 1649     | 1   | 0 | 0 | 0.601874 | FALSE | 0 | YIPF6      | 0        | 0        |
| 1649     | 1   | 0 | 0 | 0.601874 | FALSE | 0 | YRDC       | 0        | 0        |
| 1649     | 1   | 0 | 0 | 0.601874 | FALSE | 0 | YTHDF1     | 0        | 0        |
| 1649     | 1   | 0 | 0 | 0.601874 | FALSE | 0 | ZBTB14     | 0        | 0        |
| 1649     | 1   | 0 | 0 | 0.601874 | FALSE | 0 | ZBTB7B     | 0        | 0        |
| 1649     | 1   | 0 | 0 | 0.601874 | FALSE | 0 | ZC3H7A     | 0        | 0        |
| 1649     | 1   | 0 | 0 | 0.601874 | FALSE | 0 | ZC3HAV1    | 0        | 0        |
| 1649     | 1   | 0 | 0 | 0.601874 | FALSE | 0 | ZDHHC18    | 0        | 0        |
| 1649     | 1   | 0 | 0 | 0.601874 | FALSE | 0 | ZDHHC7     | 0        | 0        |
| 1649     | 1   | 0 | 0 | 0.601874 | FALSE | 0 | ZER1       | 0        | 0        |

|      |   |   |   |          |       |             |   |   |
|------|---|---|---|----------|-------|-------------|---|---|
| 1649 | 1 | 0 | 0 | 0.601874 | FALSE | 0 ZFP91-CNT | 0 | 0 |
| 1649 | 1 | 0 | 0 | 0.601874 | FALSE | 0 ZNF134    | 0 | 0 |
| 1649 | 1 | 0 | 0 | 0.601874 | FALSE | 0 ZNF154    | 0 | 0 |
| 1649 | 1 | 0 | 0 | 0.601874 | FALSE | 0 ZNF17     | 0 | 0 |
| 1649 | 1 | 0 | 0 | 0.601874 | FALSE | 0 ZNF227    | 0 | 0 |
| 1649 | 1 | 0 | 0 | 0.601874 | FALSE | 0 ZNF280B   | 0 | 0 |
| 1649 | 1 | 0 | 0 | 0.601874 | FALSE | 0 ZNF287    | 0 | 0 |
| 1649 | 1 | 0 | 0 | 0.601874 | FALSE | 0 ZNF304    | 0 | 0 |
| 1649 | 1 | 0 | 0 | 0.601874 | FALSE | 0 ZNF317    | 0 | 0 |
| 1649 | 1 | 0 | 0 | 0.601874 | FALSE | 0 ZNF324    | 0 | 0 |
| 1649 | 1 | 0 | 0 | 0.601874 | FALSE | 0 ZNF354B   | 0 | 0 |
| 1649 | 1 | 0 | 0 | 0.601874 | FALSE | 0 ZNF423    | 0 | 0 |
| 1649 | 1 | 0 | 0 | 0.601874 | FALSE | 0 ZNF436    | 0 | 0 |
| 1649 | 1 | 0 | 0 | 0.601874 | FALSE | 0 ZNF516    | 0 | 0 |
| 1649 | 1 | 0 | 0 | 0.601874 | FALSE | 0 ZNF518A   | 0 | 0 |
| 1649 | 1 | 0 | 0 | 0.601874 | FALSE | 0 ZNF526    | 0 | 0 |
| 1649 | 1 | 0 | 0 | 0.601874 | FALSE | 0 ZNF544    | 0 | 0 |
| 1649 | 1 | 0 | 0 | 0.601874 | FALSE | 0 ZNF562    | 0 | 0 |
| 1649 | 1 | 0 | 0 | 0.601874 | FALSE | 0 ZNF583    | 0 | 0 |
| 1649 | 1 | 0 | 0 | 0.601874 | FALSE | 0 ZNF621    | 0 | 0 |
| 1649 | 1 | 0 | 0 | 0.601874 | FALSE | 0 ZNF680    | 0 | 0 |
| 1649 | 1 | 0 | 0 | 0.601874 | FALSE | 0 ZNF704    | 0 | 0 |
| 1649 | 1 | 0 | 0 | 0.601874 | FALSE | 0 ZNF718    | 0 | 0 |
| 1649 | 1 | 0 | 0 | 0.601874 | FALSE | 0 ZNF721    | 0 | 0 |
| 1649 | 1 | 0 | 0 | 0.601874 | FALSE | 0 ZNF726    | 0 | 0 |
| 1649 | 1 | 0 | 0 | 0.601874 | FALSE | 0 ZNF736    | 0 | 0 |
| 1649 | 1 | 0 | 0 | 0.601874 | FALSE | 0 ZNF805    | 0 | 0 |
| 1649 | 1 | 0 | 0 | 0.601874 | FALSE | 0 ZNF91     | 0 | 0 |
| 88   | 1 | 0 | 0 | 0.503932 | FALSE | 0 ACTR3     | 0 | 0 |
| 88   | 1 | 0 | 0 | 0.503932 | FALSE | 0 ACTR5     | 0 | 0 |
| 88   | 1 | 0 | 0 | 0.503932 | FALSE | 0 BEST3     | 0 | 0 |
| 88   | 1 | 0 | 0 | 0.503932 | FALSE | 0 C1orf210  | 0 | 0 |
| 88   | 1 | 0 | 0 | 0.503932 | FALSE | 0 CASP1     | 0 | 0 |
| 88   | 1 | 0 | 0 | 0.503932 | FALSE | 0 CDC42BPG  | 0 | 0 |
| 88   | 1 | 0 | 0 | 0.503932 | FALSE | 0 CDKN2AIP  | 0 | 0 |
| 88   | 1 | 0 | 0 | 0.503932 | FALSE | 0 CLDN1     | 0 | 0 |
| 88   | 1 | 0 | 0 | 0.503932 | FALSE | 0 COIL      | 0 | 0 |
| 88   | 1 | 0 | 0 | 0.503932 | FALSE | 0 COQ7      | 0 | 0 |
| 88   | 1 | 0 | 0 | 0.503932 | FALSE | 0 GDF7      | 0 | 0 |
| 88   | 1 | 0 | 0 | 0.503932 | FALSE | 0 HOPX      | 0 | 0 |
| 88   | 1 | 0 | 0 | 0.503932 | FALSE | 0 IBA57     | 0 | 0 |
| 88   | 1 | 0 | 0 | 0.503932 | FALSE | 0 ITPRIPL1  | 0 | 0 |
| 88   | 1 | 0 | 0 | 0.503932 | FALSE | 0 KIF1C     | 0 | 0 |
| 88   | 1 | 0 | 0 | 0.503932 | FALSE | 0 MZF1      | 0 | 0 |
| 88   | 1 | 0 | 0 | 0.503932 | FALSE | 0 NFATC3    | 0 | 0 |
| 88   | 1 | 0 | 0 | 0.503932 | FALSE | 0 NXPE3     | 0 | 0 |
| 88   | 1 | 0 | 0 | 0.503932 | FALSE | 0 OPRM1     | 0 | 0 |

|     |   |   |   |          |       |   |          |   |   |
|-----|---|---|---|----------|-------|---|----------|---|---|
| 88  | 1 | 0 | 0 | 0.503932 | FALSE | 0 | PIGN     | 0 | 0 |
| 88  | 1 | 0 | 0 | 0.503932 | FALSE | 0 | PLEKHG7  | 0 | 0 |
| 88  | 1 | 0 | 0 | 0.503932 | FALSE | 0 | ROBO4    | 0 | 0 |
| 88  | 1 | 0 | 0 | 0.503932 | FALSE | 0 | RUNX1T1  | 0 | 0 |
| 88  | 1 | 0 | 0 | 0.503932 | FALSE | 0 | SMIM14   | 0 | 0 |
| 88  | 1 | 0 | 0 | 0.503932 | FALSE | 0 | SNX16    | 0 | 0 |
| 88  | 1 | 0 | 0 | 0.503932 | FALSE | 0 | SPN      | 0 | 0 |
| 88  | 1 | 0 | 0 | 0.503932 | FALSE | 0 | TFAM     | 0 | 0 |
| 88  | 1 | 0 | 0 | 0.503932 | FALSE | 0 | THBS2    | 0 | 0 |
| 88  | 1 | 0 | 0 | 0.503932 | FALSE | 0 | TMEM236  | 0 | 0 |
| 88  | 1 | 0 | 0 | 0.503932 | FALSE | 0 | TRABD2A  | 0 | 0 |
| 88  | 1 | 0 | 0 | 0.503932 | FALSE | 0 | VASH2    | 0 | 0 |
| 88  | 1 | 0 | 0 | 0.503932 | FALSE | 0 | ZDHHC23  | 0 | 0 |
| 88  | 1 | 0 | 0 | 0.503932 | FALSE | 0 | ZFP30    | 0 | 0 |
| 88  | 1 | 0 | 0 | 0.503932 | FALSE | 0 | ZNF326   | 0 | 0 |
| 88  | 1 | 0 | 0 | 0.503932 | FALSE | 0 | ZNF347   | 0 | 0 |
| 88  | 1 | 0 | 0 | 0.503932 | FALSE | 0 | ZWILCH   | 0 | 0 |
| 489 | 1 | 0 | 0 | 0.530599 | FALSE | 0 | ABCA5    | 0 | 0 |
| 489 | 1 | 0 | 0 | 0.530599 | FALSE | 0 | ACADSB   | 0 | 0 |
| 489 | 1 | 0 | 0 | 0.530599 | FALSE | 0 | ADAM12   | 0 | 0 |
| 489 | 1 | 0 | 0 | 0.530599 | FALSE | 0 | ADAP1    | 0 | 0 |
| 489 | 1 | 0 | 0 | 0.530599 | FALSE | 0 | ADGRG3   | 0 | 0 |
| 489 | 1 | 0 | 0 | 0.530599 | FALSE | 0 | AKAP10   | 0 | 0 |
| 489 | 1 | 0 | 0 | 0.530599 | FALSE | 0 | AKAP13   | 0 | 0 |
| 489 | 1 | 0 | 0 | 0.530599 | FALSE | 0 | ALG3     | 0 | 0 |
| 489 | 1 | 0 | 0 | 0.530599 | FALSE | 0 | AMPD2    | 0 | 0 |
| 489 | 1 | 0 | 0 | 0.530599 | FALSE | 0 | ARFGEF2  | 0 | 0 |
| 489 | 1 | 0 | 0 | 0.530599 | FALSE | 0 | ARHGDIG  | 0 | 0 |
| 489 | 1 | 0 | 0 | 0.530599 | FALSE | 0 | ATP6V0A1 | 0 | 0 |
| 489 | 1 | 0 | 0 | 0.530599 | FALSE | 0 | ATP6V1E1 | 0 | 0 |
| 489 | 1 | 0 | 0 | 0.530599 | FALSE | 0 | AXL      | 0 | 0 |
| 489 | 1 | 0 | 0 | 0.530599 | FALSE | 0 | B3GALT4  | 0 | 0 |
| 489 | 1 | 0 | 0 | 0.530599 | FALSE | 0 | BCORL1   | 0 | 0 |
| 489 | 1 | 0 | 0 | 0.530599 | FALSE | 0 | BIRC2    | 0 | 0 |
| 489 | 1 | 0 | 0 | 0.530599 | FALSE | 0 | BLOC1S3  | 0 | 0 |
| 489 | 1 | 0 | 0 | 0.530599 | FALSE | 0 | BMF      | 0 | 0 |
| 489 | 1 | 0 | 0 | 0.530599 | FALSE | 0 | BTBD2    | 0 | 0 |
| 489 | 1 | 0 | 0 | 0.530599 | FALSE | 0 | C15orf52 | 0 | 0 |
| 489 | 1 | 0 | 0 | 0.530599 | FALSE | 0 | C18orf32 | 0 | 0 |
| 489 | 1 | 0 | 0 | 0.530599 | FALSE | 0 | CBX3     | 0 | 0 |
| 489 | 1 | 0 | 0 | 0.530599 | FALSE | 0 | CC2D1B   | 0 | 0 |
| 489 | 1 | 0 | 0 | 0.530599 | FALSE | 0 | CCL22    | 0 | 0 |
| 489 | 1 | 0 | 0 | 0.530599 | FALSE | 0 | CD48     | 0 | 0 |
| 489 | 1 | 0 | 0 | 0.530599 | FALSE | 0 | CDC27    | 0 | 0 |
| 489 | 1 | 0 | 0 | 0.530599 | FALSE | 0 | CDK12    | 0 | 0 |
| 489 | 1 | 0 | 0 | 0.530599 | FALSE | 0 | CHD8     | 0 | 0 |
| 489 | 1 | 0 | 0 | 0.530599 | FALSE | 0 | CLASRP   | 0 | 0 |

|     |   |   |   |          |       |   |         |   |   |
|-----|---|---|---|----------|-------|---|---------|---|---|
| 489 | 1 | 0 | 0 | 0.530599 | FALSE | 0 | CLCN6   | 0 | 0 |
| 489 | 1 | 0 | 0 | 0.530599 | FALSE | 0 | CLIC5   | 0 | 0 |
| 489 | 1 | 0 | 0 | 0.530599 | FALSE | 0 | CNOT3   | 0 | 0 |
| 489 | 1 | 0 | 0 | 0.530599 | FALSE | 0 | CNPPD1  | 0 | 0 |
| 489 | 1 | 0 | 0 | 0.530599 | FALSE | 0 | COPZ1   | 0 | 0 |
| 489 | 1 | 0 | 0 | 0.530599 | FALSE | 0 | CRABP2  | 0 | 0 |
| 489 | 1 | 0 | 0 | 0.530599 | FALSE | 0 | CTDP1   | 0 | 0 |
| 489 | 1 | 0 | 0 | 0.530599 | FALSE | 0 | CTDSP1  | 0 | 0 |
| 489 | 1 | 0 | 0 | 0.530599 | FALSE | 0 | CTPS1   | 0 | 0 |
| 489 | 1 | 0 | 0 | 0.530599 | FALSE | 0 | CTSB    | 0 | 0 |
| 489 | 1 | 0 | 0 | 0.530599 | FALSE | 0 | CYTH3   | 0 | 0 |
| 489 | 1 | 0 | 0 | 0.530599 | FALSE | 0 | DBNL    | 0 | 0 |
| 489 | 1 | 0 | 0 | 0.530599 | FALSE | 0 | DCHS1   | 0 | 0 |
| 489 | 1 | 0 | 0 | 0.530599 | FALSE | 0 | DCTN5   | 0 | 0 |
| 489 | 1 | 0 | 0 | 0.530599 | FALSE | 0 | DDA1    | 0 | 0 |
| 489 | 1 | 0 | 0 | 0.530599 | FALSE | 0 | DENND4B | 0 | 0 |
| 489 | 1 | 0 | 0 | 0.530599 | FALSE | 0 | DGAT2L6 | 0 | 0 |
| 489 | 1 | 0 | 0 | 0.530599 | FALSE | 0 | DMWD    | 0 | 0 |
| 489 | 1 | 0 | 0 | 0.530599 | FALSE | 0 | DNAAF3  | 0 | 0 |
| 489 | 1 | 0 | 0 | 0.530599 | FALSE | 0 | DOK3    | 0 | 0 |
| 489 | 1 | 0 | 0 | 0.530599 | FALSE | 0 | DYRK3   | 0 | 0 |
| 489 | 1 | 0 | 0 | 0.530599 | FALSE | 0 | E2F5    | 0 | 0 |
| 489 | 1 | 0 | 0 | 0.530599 | FALSE | 0 | EDIL3   | 0 | 0 |
| 489 | 1 | 0 | 0 | 0.530599 | FALSE | 0 | EFNB1   | 0 | 0 |
| 489 | 1 | 0 | 0 | 0.530599 | FALSE | 0 | EMD     | 0 | 0 |
| 489 | 1 | 0 | 0 | 0.530599 | FALSE | 0 | EPB41L3 | 0 | 0 |
| 489 | 1 | 0 | 0 | 0.530599 | FALSE | 0 | ERF     | 0 | 0 |
| 489 | 1 | 0 | 0 | 0.530599 | FALSE | 0 | FAM104A | 0 | 0 |
| 489 | 1 | 0 | 0 | 0.530599 | FALSE | 0 | FAM76A  | 0 | 0 |
| 489 | 1 | 0 | 0 | 0.530599 | FALSE | 0 | FBXO5   | 0 | 0 |
| 489 | 1 | 0 | 0 | 0.530599 | FALSE | 0 | FLOT2   | 0 | 0 |
| 489 | 1 | 0 | 0 | 0.530599 | FALSE | 0 | FOSL1   | 0 | 0 |
| 489 | 1 | 0 | 0 | 0.530599 | FALSE | 0 | FOXRED1 | 0 | 0 |
| 489 | 1 | 0 | 0 | 0.530599 | FALSE | 0 | GABBR2  | 0 | 0 |
| 489 | 1 | 0 | 0 | 0.530599 | FALSE | 0 | GABRA3  | 0 | 0 |
| 489 | 1 | 0 | 0 | 0.530599 | FALSE | 0 | GALNT7  | 0 | 0 |
| 489 | 1 | 0 | 0 | 0.530599 | FALSE | 0 | GANAB   | 0 | 0 |
| 489 | 1 | 0 | 0 | 0.530599 | FALSE | 0 | GAPDH   | 0 | 0 |
| 489 | 1 | 0 | 0 | 0.530599 | FALSE | 0 | GBX1    | 0 | 0 |
| 489 | 1 | 0 | 0 | 0.530599 | FALSE | 0 | GIT1    | 0 | 0 |
| 489 | 1 | 0 | 0 | 0.530599 | FALSE | 0 | GLYR1   | 0 | 0 |
| 489 | 1 | 0 | 0 | 0.530599 | FALSE | 0 | GPR133  | 0 | 0 |
| 489 | 1 | 0 | 0 | 0.530599 | FALSE | 0 | GPR156  | 0 | 0 |
| 489 | 1 | 0 | 0 | 0.530599 | FALSE | 0 | GRAMD4  | 0 | 0 |
| 489 | 1 | 0 | 0 | 0.530599 | FALSE | 0 | GRM7    | 0 | 0 |
| 489 | 1 | 0 | 0 | 0.530599 | FALSE | 0 | HAPLN3  | 0 | 0 |
| 489 | 1 | 0 | 0 | 0.530599 | FALSE | 0 | HIP1R   | 0 | 0 |

|     |   |   |   |          |       |   |            |   |   |
|-----|---|---|---|----------|-------|---|------------|---|---|
| 489 | 1 | 0 | 0 | 0.530599 | FALSE | 0 | HIRIP3     | 0 | 0 |
| 489 | 1 | 0 | 0 | 0.530599 | FALSE | 0 | HK1        | 0 | 0 |
| 489 | 1 | 0 | 0 | 0.530599 | FALSE | 0 | HN1L       | 0 | 0 |
| 489 | 1 | 0 | 0 | 0.530599 | FALSE | 0 | HNRNPUL2   | 0 | 0 |
| 489 | 1 | 0 | 0 | 0.530599 | FALSE | 0 | HOXA13     | 0 | 0 |
| 489 | 1 | 0 | 0 | 0.530599 | FALSE | 0 | IFI35      | 0 | 0 |
| 489 | 1 | 0 | 0 | 0.530599 | FALSE | 0 | IL6R       | 0 | 0 |
| 489 | 1 | 0 | 0 | 0.530599 | FALSE | 0 | IQCJ-SCHIP | 0 | 0 |
| 489 | 1 | 0 | 0 | 0.530599 | FALSE | 0 | IRF3       | 0 | 0 |
| 489 | 1 | 0 | 0 | 0.530599 | FALSE | 0 | ITGB3      | 0 | 0 |
| 489 | 1 | 0 | 0 | 0.530599 | FALSE | 0 | JOSD2      | 0 | 0 |
| 489 | 1 | 0 | 0 | 0.530599 | FALSE | 0 | KLHDC10    | 0 | 0 |
| 489 | 1 | 0 | 0 | 0.530599 | FALSE | 0 | KTI12      | 0 | 0 |
| 489 | 1 | 0 | 0 | 0.530599 | FALSE | 0 | LAPTM4A    | 0 | 0 |
| 489 | 1 | 0 | 0 | 0.530599 | FALSE | 0 | LDHA       | 0 | 0 |
| 489 | 1 | 0 | 0 | 0.530599 | FALSE | 0 | LLGL1      | 0 | 0 |
| 489 | 1 | 0 | 0 | 0.530599 | FALSE | 0 | LRRC32     | 0 | 0 |
| 489 | 1 | 0 | 0 | 0.530599 | FALSE | 0 | MAPT       | 0 | 0 |
| 489 | 1 | 0 | 0 | 0.530599 | FALSE | 0 | MCFD2      | 0 | 0 |
| 489 | 1 | 0 | 0 | 0.530599 | FALSE | 0 | MEGF8      | 0 | 0 |
| 489 | 1 | 0 | 0 | 0.530599 | FALSE | 0 | MFSD8      | 0 | 0 |
| 489 | 1 | 0 | 0 | 0.530599 | FALSE | 0 | MIEF1      | 0 | 0 |
| 489 | 1 | 0 | 0 | 0.530599 | FALSE | 0 | MOAP1      | 0 | 0 |
| 489 | 1 | 0 | 0 | 0.530599 | FALSE | 0 | MTHFR      | 0 | 0 |
| 489 | 1 | 0 | 0 | 0.530599 | FALSE | 0 | MTMR9      | 0 | 0 |
| 489 | 1 | 0 | 0 | 0.530599 | FALSE | 0 | MUC2       | 0 | 0 |
| 489 | 1 | 0 | 0 | 0.530599 | FALSE | 0 | MXD4       | 0 | 0 |
| 489 | 1 | 0 | 0 | 0.530599 | FALSE | 0 | MYB        | 0 | 0 |
| 489 | 1 | 0 | 0 | 0.530599 | FALSE | 0 | MYBL2      | 0 | 0 |
| 489 | 1 | 0 | 0 | 0.530599 | FALSE | 0 | MYO19      | 0 | 0 |
| 489 | 1 | 0 | 0 | 0.530599 | FALSE | 0 | NAT8L      | 0 | 0 |
| 489 | 1 | 0 | 0 | 0.530599 | FALSE | 0 | NEUROD2    | 0 | 0 |
| 489 | 1 | 0 | 0 | 0.530599 | FALSE | 0 | NFKBIA     | 0 | 0 |
| 489 | 1 | 0 | 0 | 0.530599 | FALSE | 0 | NOTCH4     | 0 | 0 |
| 489 | 1 | 0 | 0 | 0.530599 | FALSE | 0 | NR2C2AP    | 0 | 0 |
| 489 | 1 | 0 | 0 | 0.530599 | FALSE | 0 | NTN1       | 0 | 0 |
| 489 | 1 | 0 | 0 | 0.530599 | FALSE | 0 | NTN4       | 0 | 0 |
| 489 | 1 | 0 | 0 | 0.530599 | FALSE | 0 | NUP210     | 0 | 0 |
| 489 | 1 | 0 | 0 | 0.530599 | FALSE | 0 | NXF1       | 0 | 0 |
| 489 | 1 | 0 | 0 | 0.530599 | FALSE | 0 | OXNAD1     | 0 | 0 |
| 489 | 1 | 0 | 0 | 0.530599 | FALSE | 0 | PANK2      | 0 | 0 |
| 489 | 1 | 0 | 0 | 0.530599 | FALSE | 0 | PAPLN      | 0 | 0 |
| 489 | 1 | 0 | 0 | 0.530599 | FALSE | 0 | PARP1      | 0 | 0 |
| 489 | 1 | 0 | 0 | 0.530599 | FALSE | 0 | PCNXL3     | 0 | 0 |
| 489 | 1 | 0 | 0 | 0.530599 | FALSE | 0 | PEA15      | 0 | 0 |
| 489 | 1 | 0 | 0 | 0.530599 | FALSE | 0 | PEX16      | 0 | 0 |
| 489 | 1 | 0 | 0 | 0.530599 | FALSE | 0 | PHB        | 0 | 0 |

|          |     |   |   |          |       |   |                     |          |   |
|----------|-----|---|---|----------|-------|---|---------------------|----------|---|
| 489      | 1   | 0 | 0 | 0.530599 | FALSE | 0 | PHF19               | 0        | 0 |
| 489      | 1   | 0 | 0 | 0.530599 | FALSE | 0 | PIGX                | 0        | 0 |
| 489      | 1   | 0 | 0 | 0.530599 | FALSE | 0 | PLA2G2D             | 0        | 0 |
| 489      | 1   | 0 | 0 | 0.530599 | FALSE | 0 | PLK2                | 0        | 0 |
| 489      | 1   | 0 | 0 | 0.530599 | FALSE | 0 | PPAN-P2RY           | 0        | 0 |
| 489      | 1   | 0 | 0 | 0.530599 | FALSE | 0 | PPP2R1A             | 0        | 0 |
| 489      | 1   | 0 | 0 | 0.530599 | FALSE | 0 | PRCC                | 0        | 0 |
| 489      | 1   | 0 | 0 | 0.530599 | FALSE | 0 | PRRT2               | 0        | 0 |
| 489      | 1   | 0 | 0 | 0.530599 | FALSE | 0 | PTENP1              | 0        | 0 |
| 489      | 1   | 0 | 0 | 0.530599 | FALSE | 0 | RAB11FIP4           | 0        | 0 |
| 489      | 1   | 0 | 0 | 0.530599 | FALSE | 0 | RAI14               | 0        | 0 |
| 489      | 1   | 0 | 0 | 0.530599 | FALSE | 0 | RALY                | 0        | 0 |
| 489      | 1   | 0 | 0 | 0.530599 | FALSE | 0 | RHBDF2              | 0        | 0 |
| 489      | 1   | 0 | 0 | 0.530599 | FALSE | 0 | RPS12               | 0        | 0 |
| 489      | 1   | 0 | 0 | 0.530599 | FALSE | 0 | RTL8A               | 0        | 0 |
| 489      | 1   | 0 | 0 | 0.530599 | FALSE | 0 | RWDD2A              | 0        | 0 |
| 489      | 1   | 0 | 0 | 0.530599 | FALSE | 0 | SARS2               | 0        | 0 |
| 489      | 1   | 0 | 0 | 0.530599 | FALSE | 0 | SCRN1               | 0        | 0 |
| 2.239837 | 246 | 0 | 0 | 0.682304 | TRUE  | 0 | hsa-miR-3c 98678956 | 0.072932 |   |
| 489      | 1   | 0 | 0 | 0.530599 | FALSE | 0 | SF3A2               | 0        | 0 |
| 489      | 1   | 0 | 0 | 0.530599 | FALSE | 0 | SHANK3              | 0        | 0 |
| 489      | 1   | 0 | 0 | 0.530599 | FALSE | 0 | SKI                 | 0        | 0 |
| 489      | 1   | 0 | 0 | 0.530599 | FALSE | 0 | SLC35G2             | 0        | 0 |
| 489      | 1   | 0 | 0 | 0.530599 | FALSE | 0 | SNCA                | 0        | 0 |
| 489      | 1   | 0 | 0 | 0.530599 | FALSE | 0 | SPAM1               | 0        | 0 |
| 489      | 1   | 0 | 0 | 0.530599 | FALSE | 0 | SRSF2               | 0        | 0 |
| 489      | 1   | 0 | 0 | 0.530599 | FALSE | 0 | SSX5                | 0        | 0 |
| 489      | 1   | 0 | 0 | 0.530599 | FALSE | 0 | STK25               | 0        | 0 |
| 489      | 1   | 0 | 0 | 0.530599 | FALSE | 0 | STK38L              | 0        | 0 |
| 489      | 1   | 0 | 0 | 0.530599 | FALSE | 0 | SYNGR2              | 0        | 0 |
| 489      | 1   | 0 | 0 | 0.530599 | FALSE | 0 | TBC1D23             | 0        | 0 |
| 489      | 1   | 0 | 0 | 0.530599 | FALSE | 0 | TEX22               | 0        | 0 |
| 489      | 1   | 0 | 0 | 0.530599 | FALSE | 0 | TFEB                | 0        | 0 |
| 489      | 1   | 0 | 0 | 0.530599 | FALSE | 0 | TIAF1               | 0        | 0 |
| 489      | 1   | 0 | 0 | 0.530599 | FALSE | 0 | TJP2                | 0        | 0 |
| 489      | 1   | 0 | 0 | 0.530599 | FALSE | 0 | TMEM246             | 0        | 0 |
| 489      | 1   | 0 | 0 | 0.530599 | FALSE | 0 | TMLHE               | 0        | 0 |
| 489      | 1   | 0 | 0 | 0.530599 | FALSE | 0 | TNFSF12-TI          | 0        | 0 |
| 489      | 1   | 0 | 0 | 0.530599 | FALSE | 0 | TNK2                | 0        | 0 |
| 489      | 1   | 0 | 0 | 0.530599 | FALSE | 0 | TNKS1BP1            | 0        | 0 |
| 489      | 1   | 0 | 0 | 0.530599 | FALSE | 0 | TOP2A               | 0        | 0 |
| 489      | 1   | 0 | 0 | 0.530599 | FALSE | 0 | TPCN2               | 0        | 0 |
| 489      | 1   | 0 | 0 | 0.530599 | FALSE | 0 | TRIM41              | 0        | 0 |
| 489      | 1   | 0 | 0 | 0.530599 | FALSE | 0 | TTK                 | 0        | 0 |
| 489      | 1   | 0 | 0 | 0.530599 | FALSE | 0 | UBE2S               | 0        | 0 |
| 489      | 1   | 0 | 0 | 0.530599 | FALSE | 0 | UBIAD1              | 0        | 0 |
| 489      | 1   | 0 | 0 | 0.530599 | FALSE | 0 | UBL4A               | 0        | 0 |

|     |   |   |   |          |       |   |          |   |   |
|-----|---|---|---|----------|-------|---|----------|---|---|
| 489 | 1 | 0 | 0 | 0.530599 | FALSE | 0 | UBXN2B   | 0 | 0 |
| 489 | 1 | 0 | 0 | 0.530599 | FALSE | 0 | ULBP2    | 0 | 0 |
| 489 | 1 | 0 | 0 | 0.530599 | FALSE | 0 | UNG      | 0 | 0 |
| 489 | 1 | 0 | 0 | 0.530599 | FALSE | 0 | UST      | 0 | 0 |
| 489 | 1 | 0 | 0 | 0.530599 | FALSE | 0 | VASN     | 0 | 0 |
| 489 | 1 | 0 | 0 | 0.530599 | FALSE | 0 | VPS37D   | 0 | 0 |
| 489 | 1 | 0 | 0 | 0.530599 | FALSE | 0 | XBP1     | 0 | 0 |
| 489 | 1 | 0 | 0 | 0.530599 | FALSE | 0 | XBP1P1   | 0 | 0 |
| 489 | 1 | 0 | 0 | 0.530599 | FALSE | 0 | XRN1     | 0 | 0 |
| 489 | 1 | 0 | 0 | 0.530599 | FALSE | 0 | ZAP70    | 0 | 0 |
| 489 | 1 | 0 | 0 | 0.530599 | FALSE | 0 | ZBED3    | 0 | 0 |
| 489 | 1 | 0 | 0 | 0.530599 | FALSE | 0 | ZCCHC3   | 0 | 0 |
| 489 | 1 | 0 | 0 | 0.530599 | FALSE | 0 | ZFAT     | 0 | 0 |
| 489 | 1 | 0 | 0 | 0.530599 | FALSE | 0 | ZNF551   | 0 | 0 |
| 489 | 1 | 0 | 0 | 0.530599 | FALSE | 0 | ZNF587   | 0 | 0 |
| 489 | 1 | 0 | 0 | 0.530599 | FALSE | 0 | ZNF614   | 0 | 0 |
| 489 | 1 | 0 | 0 | 0.530599 | FALSE | 0 | ZNF7     | 0 | 0 |
| 489 | 1 | 0 | 0 | 0.530599 | FALSE | 0 | ZNF783   | 0 | 0 |
| 489 | 1 | 0 | 0 | 0.530599 | FALSE | 0 | ZRSR1    | 0 | 0 |
| 246 | 1 | 0 | 0 | 0.515668 | FALSE | 0 | 4-Mar    | 0 | 0 |
| 246 | 1 | 0 | 0 | 0.515668 | FALSE | 0 | ABCD2    | 0 | 0 |
| 246 | 1 | 0 | 0 | 0.515668 | FALSE | 0 | AGK      | 0 | 0 |
| 246 | 1 | 0 | 0 | 0.515668 | FALSE | 0 | AK4      | 0 | 0 |
| 246 | 1 | 0 | 0 | 0.515668 | FALSE | 0 | ALG13    | 0 | 0 |
| 246 | 1 | 0 | 0 | 0.515668 | FALSE | 0 | ANKRD40  | 0 | 0 |
| 246 | 1 | 0 | 0 | 0.515668 | FALSE | 0 | ARNTL    | 0 | 0 |
| 246 | 1 | 0 | 0 | 0.515668 | FALSE | 0 | ARRDC1   | 0 | 0 |
| 246 | 1 | 0 | 0 | 0.515668 | FALSE | 0 | ATP6V0A2 | 0 | 0 |
| 246 | 1 | 0 | 0 | 0.515668 | FALSE | 0 | BACE2    | 0 | 0 |
| 246 | 1 | 0 | 0 | 0.515668 | FALSE | 0 | BAIAP2L1 | 0 | 0 |
| 246 | 1 | 0 | 0 | 0.515668 | FALSE | 0 | BCL10    | 0 | 0 |
| 246 | 1 | 0 | 0 | 0.515668 | FALSE | 0 | BOD1L1   | 0 | 0 |
| 246 | 1 | 0 | 0 | 0.515668 | FALSE | 0 | C6orf120 | 0 | 0 |
| 246 | 1 | 0 | 0 | 0.515668 | FALSE | 0 | C8orf88  | 0 | 0 |
| 246 | 1 | 0 | 0 | 0.515668 | FALSE | 0 | CCBL2    | 0 | 0 |
| 246 | 1 | 0 | 0 | 0.515668 | FALSE | 0 | CCDC71L  | 0 | 0 |
| 246 | 1 | 0 | 0 | 0.515668 | FALSE | 0 | CCNB1IP1 | 0 | 0 |
| 246 | 1 | 0 | 0 | 0.515668 | FALSE | 0 | CPE      | 0 | 0 |
| 246 | 1 | 0 | 0 | 0.515668 | FALSE | 0 | CYCS     | 0 | 0 |
| 246 | 1 | 0 | 0 | 0.515668 | FALSE | 0 | DARS     | 0 | 0 |
| 246 | 1 | 0 | 0 | 0.515668 | FALSE | 0 | DCAF6    | 0 | 0 |
| 246 | 1 | 0 | 0 | 0.515668 | FALSE | 0 | DCDC2    | 0 | 0 |
| 246 | 1 | 0 | 0 | 0.515668 | FALSE | 0 | DOCK10   | 0 | 0 |
| 246 | 1 | 0 | 0 | 0.515668 | FALSE | 0 | DPP8     | 0 | 0 |
| 246 | 1 | 0 | 0 | 0.515668 | FALSE | 0 | ENDOD1   | 0 | 0 |
| 246 | 1 | 0 | 0 | 0.515668 | FALSE | 0 | FOXA1    | 0 | 0 |
| 246 | 1 | 0 | 0 | 0.515668 | FALSE | 0 | FOXC1    | 0 | 0 |



|          |    |   |   |          |       |   |            |         |          |
|----------|----|---|---|----------|-------|---|------------|---------|----------|
| 246      | 1  | 0 | 0 | 0.515668 | FALSE | 0 | FOXN2      | 0       | 0        |
| 246      | 1  | 0 | 0 | 0.515668 | FALSE | 0 | GABARAP    | 0       | 0        |
| 246      | 1  | 0 | 0 | 0.515668 | FALSE | 0 | GJA3       | 0       | 0        |
| 246      | 1  | 0 | 0 | 0.515668 | FALSE | 0 | GRIK4      | 0       | 0        |
| 246      | 1  | 0 | 0 | 0.515668 | FALSE | 0 | GTPBP8     | 0       | 0        |
| 246      | 1  | 0 | 0 | 0.515668 | FALSE | 0 | HAUS5      | 0       | 0        |
| 246      | 1  | 0 | 0 | 0.515668 | FALSE | 0 | HGFAC      | 0       | 0        |
| 246      | 1  | 0 | 0 | 0.515668 | FALSE | 0 | HIC2       | 0       | 0        |
| 246      | 1  | 0 | 0 | 0.515668 | FALSE | 0 | HMG1       | 0       | 0        |
| 246      | 1  | 0 | 0 | 0.515668 | FALSE | 0 | HYLS1      | 0       | 0        |
| 246      | 1  | 0 | 0 | 0.515668 | FALSE | 0 | IL21R      | 0       | 0        |
| 246      | 1  | 0 | 0 | 0.515668 | FALSE | 0 | INPP4A     | 0       | 0        |
| 246      | 1  | 0 | 0 | 0.515668 | FALSE | 0 | IPMK       | 0       | 0        |
| 246      | 1  | 0 | 0 | 0.515668 | FALSE | 0 | IRF2       | 0       | 0        |
| 246      | 1  | 0 | 0 | 0.515668 | FALSE | 0 | KCTD5      | 0       | 0        |
| 246      | 1  | 0 | 0 | 0.515668 | FALSE | 0 | KLHL36     | 0       | 0        |
| 246      | 1  | 0 | 0 | 0.515668 | FALSE | 0 | KLHL6      | 0       | 0        |
| 246      | 1  | 0 | 0 | 0.515668 | FALSE | 0 | LRRC16A    | 0       | 0        |
| 246      | 1  | 0 | 0 | 0.515668 | FALSE | 0 | MARK3      | 0       | 0        |
| 246      | 1  | 0 | 0 | 0.515668 | FALSE | 0 | MEF2C      | 0       | 0        |
| 246      | 1  | 0 | 0 | 0.515668 | FALSE | 0 | METTL20    | 0       | 0        |
| 246      | 1  | 0 | 0 | 0.515668 | FALSE | 0 | MFAP1      | 0       | 0        |
| 246      | 1  | 0 | 0 | 0.515668 | FALSE | 0 | MPP6       | 0       | 0        |
| 246      | 1  | 0 | 0 | 0.515668 | FALSE | 0 | MRPS18C    | 0       | 0        |
| 246      | 1  | 0 | 0 | 0.515668 | FALSE | 0 | N4BP2      | 0       | 0        |
| 246      | 1  | 0 | 0 | 0.515668 | FALSE | 0 | NEU3       | 0       | 0        |
| 246      | 1  | 0 | 0 | 0.515668 | FALSE | 0 | NRXN1      | 0       | 0        |
| 246      | 1  | 0 | 0 | 0.515668 | FALSE | 0 | NUB1       | 0       | 0        |
| 246      | 1  | 0 | 0 | 0.515668 | FALSE | 0 | OPHN1      | 0       | 0        |
| 246      | 1  | 0 | 0 | 0.515668 | FALSE | 0 | PAK6       | 0       | 0        |
| 246      | 1  | 0 | 0 | 0.515668 | FALSE | 0 | PAX5       | 0       | 0        |
| 246      | 1  | 0 | 0 | 0.515668 | FALSE | 0 | PBRM1      | 0       | 0        |
| 246      | 1  | 0 | 0 | 0.515668 | FALSE | 0 | PCDH15     | 0       | 0        |
| 246      | 1  | 0 | 0 | 0.515668 | FALSE | 0 | PCM1       | 0       | 0        |
| 2.531915 | 47 | 0 | 0 | 0.666697 | TRUE  | 0 | hsa-miR-37 | 4974732 | 0.102128 |
| 246      | 1  | 0 | 0 | 0.515668 | FALSE | 0 | PGRMC1     | 0       | 0        |
| 246      | 1  | 0 | 0 | 0.515668 | FALSE | 0 | PLBD2      | 0       | 0        |
| 246      | 1  | 0 | 0 | 0.515668 | FALSE | 0 | PPP1R12B   | 0       | 0        |
| 246      | 1  | 0 | 0 | 0.515668 | FALSE | 0 | PPP1R8     | 0       | 0        |
| 246      | 1  | 0 | 0 | 0.515668 | FALSE | 0 | PSIP1      | 0       | 0        |
| 246      | 1  | 0 | 0 | 0.515668 | FALSE | 0 | PSMD14     | 0       | 0        |
| 246      | 1  | 0 | 0 | 0.515668 | FALSE | 0 | PYURF      | 0       | 0        |
| 246      | 1  | 0 | 0 | 0.515668 | FALSE | 0 | RAB3GAP2   | 0       | 0        |
| 246      | 1  | 0 | 0 | 0.515668 | FALSE | 0 | RBM8A      | 0       | 0        |
| 246      | 1  | 0 | 0 | 0.515668 | FALSE | 0 | RNF2       | 0       | 0        |
| 246      | 1  | 0 | 0 | 0.515668 | FALSE | 0 | RRM2B      | 0       | 0        |
| 246      | 1  | 0 | 0 | 0.515668 | FALSE | 0 | SAP18      | 0       | 0        |

|          |     |   |   |          |       |                       |          |   |
|----------|-----|---|---|----------|-------|-----------------------|----------|---|
| 246      | 1   | 0 | 0 | 0.515668 | FALSE | 0 SAT2                | 0        | 0 |
| 246      | 1   | 0 | 0 | 0.515668 | FALSE | 0 SCML2               | 0        | 0 |
| 246      | 1   | 0 | 0 | 0.515668 | FALSE | 0 SH3RF3              | 0        | 0 |
| 246      | 1   | 0 | 0 | 0.515668 | FALSE | 0 SHROOM3             | 0        | 0 |
| 246      | 1   | 0 | 0 | 0.515668 | FALSE | 0 SLC16A7             | 0        | 0 |
| 2.188525 | 122 | 0 | 0 | 0.673333 | TRUE  | 0 hsa-miR-38 24017260 | 0.074283 |   |
| 246      | 1   | 0 | 0 | 0.515668 | FALSE | 0 SLC7A7              | 0        | 0 |
| 246      | 1   | 0 | 0 | 0.515668 | FALSE | 0 SLC9A8              | 0        | 0 |
| 246      | 1   | 0 | 0 | 0.515668 | FALSE | 0 SNX10               | 0        | 0 |
| 246      | 1   | 0 | 0 | 0.515668 | FALSE | 0 ST6GALNA4           | 0        | 0 |
| 246      | 1   | 0 | 0 | 0.515668 | FALSE | 0 THAP4               | 0        | 0 |
| 246      | 1   | 0 | 0 | 0.515668 | FALSE | 0 TM4SF1              | 0        | 0 |
| 246      | 1   | 0 | 0 | 0.515668 | FALSE | 0 TMA16               | 0        | 0 |
| 246      | 1   | 0 | 0 | 0.515668 | FALSE | 0 TRAM2               | 0        | 0 |
| 246      | 1   | 0 | 0 | 0.515668 | FALSE | 0 TRIM38              | 0        | 0 |
| 246      | 1   | 0 | 0 | 0.515668 | FALSE | 0 TSFM                | 0        | 0 |
| 246      | 1   | 0 | 0 | 0.515668 | FALSE | 0 UNC119B             | 0        | 0 |
| 246      | 1   | 0 | 0 | 0.515668 | FALSE | 0 XRCC2               | 0        | 0 |
| 246      | 1   | 0 | 0 | 0.515668 | FALSE | 0 ZBTB46              | 0        | 0 |
| 246      | 1   | 0 | 0 | 0.515668 | FALSE | 0 ZCCHC6              | 0        | 0 |
| 246      | 1   | 0 | 0 | 0.515668 | FALSE | 0 ZDHHC20             | 0        | 0 |
| 246      | 1   | 0 | 0 | 0.515668 | FALSE | 0 ZNF418              | 0        | 0 |
| 246      | 1   | 0 | 0 | 0.515668 | FALSE | 0 ZNF699              | 0        | 0 |
| 246      | 1   | 0 | 0 | 0.515668 | FALSE | 0 ZNF791              | 0        | 0 |
| 47       | 1   | 0 | 0 | 0.500061 | FALSE | 0 C2orf72             | 0        | 0 |
| 47       | 1   | 0 | 0 | 0.500061 | FALSE | 0 CELF4               | 0        | 0 |
| 47       | 1   | 0 | 0 | 0.500061 | FALSE | 0 DCTPP1              | 0        | 0 |
| 47       | 1   | 0 | 0 | 0.500061 | FALSE | 0 DEPDC5              | 0        | 0 |
| 47       | 1   | 0 | 0 | 0.500061 | FALSE | 0 DPY19L3             | 0        | 0 |
| 47       | 1   | 0 | 0 | 0.500061 | FALSE | 0 IGDCC3              | 0        | 0 |
| 47       | 1   | 0 | 0 | 0.500061 | FALSE | 0 LGSN                | 0        | 0 |
| 47       | 1   | 0 | 0 | 0.500061 | FALSE | 0 NDST1               | 0        | 0 |
| 47       | 1   | 0 | 0 | 0.500061 | FALSE | 0 PRKD2               | 0        | 0 |
| 47       | 1   | 0 | 0 | 0.500061 | FALSE | 0 RCC2                | 0        | 0 |
| 47       | 1   | 0 | 0 | 0.500061 | FALSE | 0 SPA17               | 0        | 0 |
| 47       | 1   | 0 | 0 | 0.500061 | FALSE | 0 TXNL1               | 0        | 0 |
| 47       | 1   | 0 | 0 | 0.500061 | FALSE | 0 ZNF609              | 0        | 0 |
| 122      | 1   | 0 | 0 | 0.506697 | FALSE | 0 ACTR8               | 0        | 0 |
| 122      | 1   | 0 | 0 | 0.506697 | FALSE | 0 BRD7                | 0        | 0 |
| 122      | 1   | 0 | 0 | 0.506697 | FALSE | 0 C9orf41             | 0        | 0 |
| 122      | 1   | 0 | 0 | 0.506697 | FALSE | 0 CAPN7               | 0        | 0 |
| 122      | 1   | 0 | 0 | 0.506697 | FALSE | 0 CASC4               | 0        | 0 |
| 122      | 1   | 0 | 0 | 0.506697 | FALSE | 0 CD244               | 0        | 0 |
| 122      | 1   | 0 | 0 | 0.506697 | FALSE | 0 CDK19               | 0        | 0 |
| 122      | 1   | 0 | 0 | 0.506697 | FALSE | 0 CLPB                | 0        | 0 |
| 122      | 1   | 0 | 0 | 0.506697 | FALSE | 0 CNIH1               | 0        | 0 |
| 122      | 1   | 0 | 0 | 0.506697 | FALSE | 0 COX6C               | 0        | 0 |

|          |     |   |   |          |       |   |                     |          |   |
|----------|-----|---|---|----------|-------|---|---------------------|----------|---|
| 122      | 1   | 0 | 0 | 0.506697 | FALSE | 0 | DUSP3               | 0        | 0 |
| 122      | 1   | 0 | 0 | 0.506697 | FALSE | 0 | ENO2                | 0        | 0 |
| 122      | 1   | 0 | 0 | 0.506697 | FALSE | 0 | FUBP3               | 0        | 0 |
| 122      | 1   | 0 | 0 | 0.506697 | FALSE | 0 | GABRB2              | 0        | 0 |
| 122      | 1   | 0 | 0 | 0.506697 | FALSE | 0 | GP5                 | 0        | 0 |
| 122      | 1   | 0 | 0 | 0.506697 | FALSE | 0 | HERC2               | 0        | 0 |
| 122      | 1   | 0 | 0 | 0.506697 | FALSE | 0 | KIAA2022            | 0        | 0 |
| 122      | 1   | 0 | 0 | 0.506697 | FALSE | 0 | LIMS3               | 0        | 0 |
| 122      | 1   | 0 | 0 | 0.506697 | FALSE | 0 | LIMS4               | 0        | 0 |
| 122      | 1   | 0 | 0 | 0.506697 | FALSE | 0 | LIPA                | 0        | 0 |
| 122      | 1   | 0 | 0 | 0.506697 | FALSE | 0 | LTBP1               | 0        | 0 |
| 122      | 1   | 0 | 0 | 0.506697 | FALSE | 0 | LY6K                | 0        | 0 |
| 122      | 1   | 0 | 0 | 0.506697 | FALSE | 0 | MEAF6               | 0        | 0 |
| 122      | 1   | 0 | 0 | 0.506697 | FALSE | 0 | NDUFV3              | 0        | 0 |
| 122      | 1   | 0 | 0 | 0.506697 | FALSE | 0 | NSRP1               | 0        | 0 |
| 122      | 1   | 0 | 0 | 0.506697 | FALSE | 0 | PCTP                | 0        | 0 |
| 122      | 1   | 0 | 0 | 0.506697 | FALSE | 0 | PHLDB2              | 0        | 0 |
| 2.136364 | 44  | 0 | 0 | 0.663195 | TRUE  | 0 | hsa-miR-45 5107528  | 0.081169 |   |
| 122      | 1   | 0 | 0 | 0.506697 | FALSE | 0 | PITPNC1             | 0        | 0 |
| 122      | 1   | 0 | 0 | 0.506697 | FALSE | 0 | PRKAA2              | 0        | 0 |
| 122      | 1   | 0 | 0 | 0.506697 | FALSE | 0 | RBM47               | 0        | 0 |
| 122      | 1   | 0 | 0 | 0.506697 | FALSE | 0 | RIMBP2              | 0        | 0 |
| 122      | 1   | 0 | 0 | 0.506697 | FALSE | 0 | RSL24D1             | 0        | 0 |
| 122      | 1   | 0 | 0 | 0.506697 | FALSE | 0 | S100A14             | 0        | 0 |
| 122      | 1   | 0 | 0 | 0.506697 | FALSE | 0 | SDHAF2              | 0        | 0 |
| 122      | 1   | 0 | 0 | 0.506697 | FALSE | 0 | SELENOI             | 0        | 0 |
| 122      | 1   | 0 | 0 | 0.506697 | FALSE | 0 | SETD2               | 0        | 0 |
| 122      | 1   | 0 | 0 | 0.506697 | FALSE | 0 | SLC30A6             | 0        | 0 |
| 122      | 1   | 0 | 0 | 0.506697 | FALSE | 0 | ST8SIA1             | 0        | 0 |
| 122      | 1   | 0 | 0 | 0.506697 | FALSE | 0 | STPG1               | 0        | 0 |
| 122      | 1   | 0 | 0 | 0.506697 | FALSE | 0 | SUV420H1            | 0        | 0 |
| 122      | 1   | 0 | 0 | 0.506697 | FALSE | 0 | TARS                | 0        | 0 |
| 122      | 1   | 0 | 0 | 0.506697 | FALSE | 0 | TFCP2               | 0        | 0 |
| 122      | 1   | 0 | 0 | 0.506697 | FALSE | 0 | TP53BP2             | 0        | 0 |
| 122      | 1   | 0 | 0 | 0.506697 | FALSE | 0 | TRMT10B             | 0        | 0 |
| 122      | 1   | 0 | 0 | 0.506697 | FALSE | 0 | TXK                 | 0        | 0 |
| 122      | 1   | 0 | 0 | 0.506697 | FALSE | 0 | TYRP1               | 0        | 0 |
| 122      | 1   | 0 | 0 | 0.506697 | FALSE | 0 | VIMP                | 0        | 0 |
| 122      | 1   | 0 | 0 | 0.506697 | FALSE | 0 | ZCRB1               | 0        | 0 |
| 122      | 1   | 0 | 0 | 0.506697 | FALSE | 0 | ZKSCAN2             | 0        | 0 |
| 122      | 1   | 0 | 0 | 0.506697 | FALSE | 0 | ZNF616              | 0        | 0 |
| 122      | 1   | 0 | 0 | 0.506697 | FALSE | 0 | ZNF697              | 0        | 0 |
| 2.150442 | 226 | 0 | 0 | 0.679048 | TRUE  | 0 | hsa-miR-45 96001696 | 0.071903 |   |
| 44       | 1   | 0 | 0 | 0.496559 | FALSE | 0 | ADCY9               | 0        | 0 |
| 44       | 1   | 0 | 0 | 0.496559 | FALSE | 0 | AMH                 | 0        | 0 |
| 44       | 1   | 0 | 0 | 0.496559 | FALSE | 0 | ARHGAP40            | 0        | 0 |
| 44       | 1   | 0 | 0 | 0.496559 | FALSE | 0 | BARHL1              | 0        | 0 |

|     |   |   |   |          |       |   |           |   |   |
|-----|---|---|---|----------|-------|---|-----------|---|---|
| 44  | 1 | 0 | 0 | 0.496559 | FALSE | 0 | BRSK2     | 0 | 0 |
| 44  | 1 | 0 | 0 | 0.496559 | FALSE | 0 | CAPNS1    | 0 | 0 |
| 44  | 1 | 0 | 0 | 0.496559 | FALSE | 0 | CERS1     | 0 | 0 |
| 44  | 1 | 0 | 0 | 0.496559 | FALSE | 0 | CSTF1     | 0 | 0 |
| 44  | 1 | 0 | 0 | 0.496559 | FALSE | 0 | IRAK3     | 0 | 0 |
| 44  | 1 | 0 | 0 | 0.496559 | FALSE | 0 | KIAA0754  | 0 | 0 |
| 44  | 1 | 0 | 0 | 0.496559 | FALSE | 0 | LEPROTL1  | 0 | 0 |
| 44  | 1 | 0 | 0 | 0.496559 | FALSE | 0 | NKX2-3    | 0 | 0 |
| 44  | 1 | 0 | 0 | 0.496559 | FALSE | 0 | PEX26     | 0 | 0 |
| 44  | 1 | 0 | 0 | 0.496559 | FALSE | 0 | PTGIS     | 0 | 0 |
| 44  | 1 | 0 | 0 | 0.496559 | FALSE | 0 | RGS6      | 0 | 0 |
| 44  | 1 | 0 | 0 | 0.496559 | FALSE | 0 | RPS27L    | 0 | 0 |
| 44  | 1 | 0 | 0 | 0.496559 | FALSE | 0 | SCAF4     | 0 | 0 |
| 44  | 1 | 0 | 0 | 0.496559 | FALSE | 0 | STRN4     | 0 | 0 |
| 44  | 1 | 0 | 0 | 0.496559 | FALSE | 0 | TAF1      | 0 | 0 |
| 44  | 1 | 0 | 0 | 0.496559 | FALSE | 0 | TMEM63C   | 0 | 0 |
| 44  | 1 | 0 | 0 | 0.496559 | FALSE | 0 | ZRANB2    | 0 | 0 |
| 226 | 1 | 0 | 0 | 0.512412 | FALSE | 0 | ABCC6     | 0 | 0 |
| 226 | 1 | 0 | 0 | 0.512412 | FALSE | 0 | AGAP9     | 0 | 0 |
| 226 | 1 | 0 | 0 | 0.512412 | FALSE | 0 | AHCYL2    | 0 | 0 |
| 226 | 1 | 0 | 0 | 0.512412 | FALSE | 0 | AIG1      | 0 | 0 |
| 226 | 1 | 0 | 0 | 0.512412 | FALSE | 0 | ALKBH5    | 0 | 0 |
| 226 | 1 | 0 | 0 | 0.512412 | FALSE | 0 | ASTN2     | 0 | 0 |
| 226 | 1 | 0 | 0 | 0.512412 | FALSE | 0 | BACH2     | 0 | 0 |
| 226 | 1 | 0 | 0 | 0.512412 | FALSE | 0 | C12orf55  | 0 | 0 |
| 226 | 1 | 0 | 0 | 0.512412 | FALSE | 0 | C14orf144 | 0 | 0 |
| 226 | 1 | 0 | 0 | 0.512412 | FALSE | 0 | CABLES1   | 0 | 0 |
| 226 | 1 | 0 | 0 | 0.512412 | FALSE | 0 | CCNT1     | 0 | 0 |
| 226 | 1 | 0 | 0 | 0.512412 | FALSE | 0 | CDC42SE1  | 0 | 0 |
| 226 | 1 | 0 | 0 | 0.512412 | FALSE | 0 | CES2      | 0 | 0 |
| 226 | 1 | 0 | 0 | 0.512412 | FALSE | 0 | CRMP1     | 0 | 0 |
| 226 | 1 | 0 | 0 | 0.512412 | FALSE | 0 | CTTNBP2N  | 0 | 0 |
| 226 | 1 | 0 | 0 | 0.512412 | FALSE | 0 | DPY19L4   | 0 | 0 |
| 226 | 1 | 0 | 0 | 0.512412 | FALSE | 0 | DUSP9     | 0 | 0 |
| 226 | 1 | 0 | 0 | 0.512412 | FALSE | 0 | EIF5AL1   | 0 | 0 |
| 226 | 1 | 0 | 0 | 0.512412 | FALSE | 0 | ELP6      | 0 | 0 |
| 226 | 1 | 0 | 0 | 0.512412 | FALSE | 0 | FAM129B   | 0 | 0 |
| 226 | 1 | 0 | 0 | 0.512412 | FALSE | 0 | FOXO6     | 0 | 0 |
| 226 | 1 | 0 | 0 | 0.512412 | FALSE | 0 | FSTL4     | 0 | 0 |
| 226 | 1 | 0 | 0 | 0.512412 | FALSE | 0 | GATA6     | 0 | 0 |
| 226 | 1 | 0 | 0 | 0.512412 | FALSE | 0 | GOLGA8H   | 0 | 0 |
| 226 | 1 | 0 | 0 | 0.512412 | FALSE | 0 | GOLGA8J   | 0 | 0 |
| 226 | 1 | 0 | 0 | 0.512412 | FALSE | 0 | GOLGA8M   | 0 | 0 |
| 226 | 1 | 0 | 0 | 0.512412 | FALSE | 0 | GPIHBP1   | 0 | 0 |
| 226 | 1 | 0 | 0 | 0.512412 | FALSE | 0 | GPR173    | 0 | 0 |
| 226 | 1 | 0 | 0 | 0.512412 | FALSE | 0 | GRK4      | 0 | 0 |
| 226 | 1 | 0 | 0 | 0.512412 | FALSE | 0 | HAL       | 0 | 0 |

|     |   |   |   |          |       |   |          |   |   |
|-----|---|---|---|----------|-------|---|----------|---|---|
| 226 | 1 | 0 | 0 | 0.512412 | FALSE | 0 | HLA-DRB5 | 0 | 0 |
| 226 | 1 | 0 | 0 | 0.512412 | FALSE | 0 | HMG2     | 0 | 0 |
| 226 | 1 | 0 | 0 | 0.512412 | FALSE | 0 | HOXA3    | 0 | 0 |
| 226 | 1 | 0 | 0 | 0.512412 | FALSE | 0 | HRK      | 0 | 0 |
| 226 | 1 | 0 | 0 | 0.512412 | FALSE | 0 | IDH3A    | 0 | 0 |
| 226 | 1 | 0 | 0 | 0.512412 | FALSE | 0 | IGLL5    | 0 | 0 |
| 226 | 1 | 0 | 0 | 0.512412 | FALSE | 0 | ING4     | 0 | 0 |
| 226 | 1 | 0 | 0 | 0.512412 | FALSE | 0 | KCND1    | 0 | 0 |
| 226 | 1 | 0 | 0 | 0.512412 | FALSE | 0 | KCNH2    | 0 | 0 |
| 226 | 1 | 0 | 0 | 0.512412 | FALSE | 0 | KCNK5    | 0 | 0 |
| 226 | 1 | 0 | 0 | 0.512412 | FALSE | 0 | KDM5C    | 0 | 0 |
| 226 | 1 | 0 | 0 | 0.512412 | FALSE | 0 | LCE1B    | 0 | 0 |
| 226 | 1 | 0 | 0 | 0.512412 | FALSE | 0 | LRRC20   | 0 | 0 |
| 226 | 1 | 0 | 0 | 0.512412 | FALSE | 0 | MAF      | 0 | 0 |
| 226 | 1 | 0 | 0 | 0.512412 | FALSE | 0 | MAP7D1   | 0 | 0 |
| 226 | 1 | 0 | 0 | 0.512412 | FALSE | 0 | MAPK13   | 0 | 0 |
| 226 | 1 | 0 | 0 | 0.512412 | FALSE | 0 | MED7     | 0 | 0 |
| 226 | 1 | 0 | 0 | 0.512412 | FALSE | 0 | MTHFSD   | 0 | 0 |
| 226 | 1 | 0 | 0 | 0.512412 | FALSE | 0 | MTMR1    | 0 | 0 |
| 226 | 1 | 0 | 0 | 0.512412 | FALSE | 0 | MYL12A   | 0 | 0 |
| 226 | 1 | 0 | 0 | 0.512412 | FALSE | 0 | NAB2     | 0 | 0 |
| 226 | 1 | 0 | 0 | 0.512412 | FALSE | 0 | NAT9     | 0 | 0 |
| 226 | 1 | 0 | 0 | 0.512412 | FALSE | 0 | NCAPH    | 0 | 0 |
| 226 | 1 | 0 | 0 | 0.512412 | FALSE | 0 | NUDCD2   | 0 | 0 |
| 226 | 1 | 0 | 0 | 0.512412 | FALSE | 0 | NXN      | 0 | 0 |
| 226 | 1 | 0 | 0 | 0.512412 | FALSE | 0 | PALD1    | 0 | 0 |
| 226 | 1 | 0 | 0 | 0.512412 | FALSE | 0 | PANK4    | 0 | 0 |
| 226 | 1 | 0 | 0 | 0.512412 | FALSE | 0 | PCBP1    | 0 | 0 |
| 226 | 1 | 0 | 0 | 0.512412 | FALSE | 0 | PHC2     | 0 | 0 |
| 226 | 1 | 0 | 0 | 0.512412 | FALSE | 0 | PIM2     | 0 | 0 |
| 226 | 1 | 0 | 0 | 0.512412 | FALSE | 0 | PLXNA2   | 0 | 0 |
| 226 | 1 | 0 | 0 | 0.512412 | FALSE | 0 | PRKCH    | 0 | 0 |
| 226 | 1 | 0 | 0 | 0.512412 | FALSE | 0 | PTPA     | 0 | 0 |
| 226 | 1 | 0 | 0 | 0.512412 | FALSE | 0 | PTPN6    | 0 | 0 |
| 226 | 1 | 0 | 0 | 0.512412 | FALSE | 0 | REXO2    | 0 | 0 |
| 226 | 1 | 0 | 0 | 0.512412 | FALSE | 0 | RPRM     | 0 | 0 |
| 226 | 1 | 0 | 0 | 0.512412 | FALSE | 0 | SAMD10   | 0 | 0 |
| 226 | 1 | 0 | 0 | 0.512412 | FALSE | 0 | SAMD14   | 0 | 0 |
| 226 | 1 | 0 | 0 | 0.512412 | FALSE | 0 | SBNO1    | 0 | 0 |
| 226 | 1 | 0 | 0 | 0.512412 | FALSE | 0 | SEMA3F   | 0 | 0 |
| 226 | 1 | 0 | 0 | 0.512412 | FALSE | 0 | SETDB1   | 0 | 0 |
| 226 | 1 | 0 | 0 | 0.512412 | FALSE | 0 | SFN      | 0 | 0 |
| 226 | 1 | 0 | 0 | 0.512412 | FALSE | 0 | SHISA9   | 0 | 0 |
| 226 | 1 | 0 | 0 | 0.512412 | FALSE | 0 | SIAH3    | 0 | 0 |
| 226 | 1 | 0 | 0 | 0.512412 | FALSE | 0 | SLC2A1   | 0 | 0 |
| 226 | 1 | 0 | 0 | 0.512412 | FALSE | 0 | SLF1     | 0 | 0 |
| 226 | 1 | 0 | 0 | 0.512412 | FALSE | 0 | SND1     | 0 | 0 |

|          |     |   |   |          |       |                       |         |   |
|----------|-----|---|---|----------|-------|-----------------------|---------|---|
| 226      | 1   | 0 | 0 | 0.512412 | FALSE | 0 SPATA6              | 0       | 0 |
| 226      | 1   | 0 | 0 | 0.512412 | FALSE | 0 SPRY4               | 0       | 0 |
| 226      | 1   | 0 | 0 | 0.512412 | FALSE | 0 SUMO1               | 0       | 0 |
| 226      | 1   | 0 | 0 | 0.512412 | FALSE | 0 TAF12               | 0       | 0 |
| 226      | 1   | 0 | 0 | 0.512412 | FALSE | 0 TAF7                | 0       | 0 |
| 226      | 1   | 0 | 0 | 0.512412 | FALSE | 0 TJP3                | 0       | 0 |
| 1.937037 | 270 | 0 | 0 | 0.683779 | TRUE  | 0 hsa-miR-6C 87046650 | 0.05512 |   |
| 226      | 1   | 0 | 0 | 0.512412 | FALSE | 0 TMEM63A             | 0       | 0 |
| 226      | 1   | 0 | 0 | 0.512412 | FALSE | 0 TPM2                | 0       | 0 |
| 226      | 1   | 0 | 0 | 0.512412 | FALSE | 0 TRIB3               | 0       | 0 |
| 226      | 1   | 0 | 0 | 0.512412 | FALSE | 0 TRIM56              | 0       | 0 |
| 226      | 1   | 0 | 0 | 0.512412 | FALSE | 0 UBE2J1              | 0       | 0 |
| 226      | 1   | 0 | 0 | 0.512412 | FALSE | 0 WNT8B               | 0       | 0 |
| 226      | 1   | 0 | 0 | 0.512412 | FALSE | 0 ZNF34               | 0       | 0 |
| 226      | 1   | 0 | 0 | 0.512412 | FALSE | 0 ZNF774              | 0       | 0 |
| 226      | 1   | 0 | 0 | 0.512412 | FALSE | 0 ZNF84               | 0       | 0 |
| 270      | 1   | 0 | 0 | 0.517143 | FALSE | 0 14-Sep              | 0       | 0 |
| 270      | 1   | 0 | 0 | 0.517143 | FALSE | 0 A2ML1               | 0       | 0 |
| 270      | 1   | 0 | 0 | 0.517143 | FALSE | 0 ACOT2               | 0       | 0 |
| 270      | 1   | 0 | 0 | 0.517143 | FALSE | 0 ADA2                | 0       | 0 |
| 270      | 1   | 0 | 0 | 0.517143 | FALSE | 0 ADIPOQ              | 0       | 0 |
| 270      | 1   | 0 | 0 | 0.517143 | FALSE | 0 ADSL                | 0       | 0 |
| 270      | 1   | 0 | 0 | 0.517143 | FALSE | 0 AKT1S1              | 0       | 0 |
| 270      | 1   | 0 | 0 | 0.517143 | FALSE | 0 ARHGAP39            | 0       | 0 |
| 270      | 1   | 0 | 0 | 0.517143 | FALSE | 0 ARL5C               | 0       | 0 |
| 270      | 1   | 0 | 0 | 0.517143 | FALSE | 0 ASPA                | 0       | 0 |
| 270      | 1   | 0 | 0 | 0.517143 | FALSE | 0 BCAM                | 0       | 0 |
| 270      | 1   | 0 | 0 | 0.517143 | FALSE | 0 BPNT1               | 0       | 0 |
| 270      | 1   | 0 | 0 | 0.517143 | FALSE | 0 C10orf111           | 0       | 0 |
| 270      | 1   | 0 | 0 | 0.517143 | FALSE | 0 C12orf49            | 0       | 0 |
| 270      | 1   | 0 | 0 | 0.517143 | FALSE | 0 C1GALT1C1           | 0       | 0 |
| 270      | 1   | 0 | 0 | 0.517143 | FALSE | 0 C9orf3              | 0       | 0 |
| 270      | 1   | 0 | 0 | 0.517143 | FALSE | 0 CALML3              | 0       | 0 |
| 270      | 1   | 0 | 0 | 0.517143 | FALSE | 0 CBY3                | 0       | 0 |
| 270      | 1   | 0 | 0 | 0.517143 | FALSE | 0 CCR4                | 0       | 0 |
| 270      | 1   | 0 | 0 | 0.517143 | FALSE | 0 CDH7                | 0       | 0 |
| 270      | 1   | 0 | 0 | 0.517143 | FALSE | 0 CSTF2               | 0       | 0 |
| 270      | 1   | 0 | 0 | 0.517143 | FALSE | 0 CTDNEP1             | 0       | 0 |
| 270      | 1   | 0 | 0 | 0.517143 | FALSE | 0 DENND2C             | 0       | 0 |
| 270      | 1   | 0 | 0 | 0.517143 | FALSE | 0 ECE1                | 0       | 0 |
| 270      | 1   | 0 | 0 | 0.517143 | FALSE | 0 ECSIT               | 0       | 0 |
| 270      | 1   | 0 | 0 | 0.517143 | FALSE | 0 EFCAB11             | 0       | 0 |
| 270      | 1   | 0 | 0 | 0.517143 | FALSE | 0 ELFN2               | 0       | 0 |
| 270      | 1   | 0 | 0 | 0.517143 | FALSE | 0 EMILIN2             | 0       | 0 |
| 270      | 1   | 0 | 0 | 0.517143 | FALSE | 0 ESF1                | 0       | 0 |
| 270      | 1   | 0 | 0 | 0.517143 | FALSE | 0 ETV7                | 0       | 0 |
| 270      | 1   | 0 | 0 | 0.517143 | FALSE | 0 F2                  | 0       | 0 |

|     |   |   |   |          |       |   |          |   |   |
|-----|---|---|---|----------|-------|---|----------|---|---|
| 270 | 1 | 0 | 0 | 0.517143 | FALSE | 0 | FAAH     | 0 | 0 |
| 270 | 1 | 0 | 0 | 0.517143 | FALSE | 0 | FECH     | 0 | 0 |
| 270 | 1 | 0 | 0 | 0.517143 | FALSE | 0 | GCK      | 0 | 0 |
| 270 | 1 | 0 | 0 | 0.517143 | FALSE | 0 | GM2A     | 0 | 0 |
| 270 | 1 | 0 | 0 | 0.517143 | FALSE | 0 | GNG4     | 0 | 0 |
| 270 | 1 | 0 | 0 | 0.517143 | FALSE | 0 | GOLGA3   | 0 | 0 |
| 270 | 1 | 0 | 0 | 0.517143 | FALSE | 0 | GPALPP1  | 0 | 0 |
| 270 | 1 | 0 | 0 | 0.517143 | FALSE | 0 | GREM2    | 0 | 0 |
| 270 | 1 | 0 | 0 | 0.517143 | FALSE | 0 | HASPIN   | 0 | 0 |
| 270 | 1 | 0 | 0 | 0.517143 | FALSE | 0 | HAVCR1   | 0 | 0 |
| 270 | 1 | 0 | 0 | 0.517143 | FALSE | 0 | HOMEZ    | 0 | 0 |
| 270 | 1 | 0 | 0 | 0.517143 | FALSE | 0 | HOXD3    | 0 | 0 |
| 270 | 1 | 0 | 0 | 0.517143 | FALSE | 0 | HRNR     | 0 | 0 |
| 270 | 1 | 0 | 0 | 0.517143 | FALSE | 0 | IDE      | 0 | 0 |
| 270 | 1 | 0 | 0 | 0.517143 | FALSE | 0 | IGF1     | 0 | 0 |
| 270 | 1 | 0 | 0 | 0.517143 | FALSE | 0 | INAFM1   | 0 | 0 |
| 270 | 1 | 0 | 0 | 0.517143 | FALSE | 0 | IRGQ     | 0 | 0 |
| 270 | 1 | 0 | 0 | 0.517143 | FALSE | 0 | ITGAX    | 0 | 0 |
| 270 | 1 | 0 | 0 | 0.517143 | FALSE | 0 | JAM2     | 0 | 0 |
| 270 | 1 | 0 | 0 | 0.517143 | FALSE | 0 | KBTBD12  | 0 | 0 |
| 270 | 1 | 0 | 0 | 0.517143 | FALSE | 0 | KIAA0513 | 0 | 0 |
| 270 | 1 | 0 | 0 | 0.517143 | FALSE | 0 | KIFC2    | 0 | 0 |
| 270 | 1 | 0 | 0 | 0.517143 | FALSE | 0 | KNL1     | 0 | 0 |
| 270 | 1 | 0 | 0 | 0.517143 | FALSE | 0 | LBX1     | 0 | 0 |
| 270 | 1 | 0 | 0 | 0.517143 | FALSE | 0 | LILRA5   | 0 | 0 |
| 270 | 1 | 0 | 0 | 0.517143 | FALSE | 0 | LIPG     | 0 | 0 |
| 270 | 1 | 0 | 0 | 0.517143 | FALSE | 0 | MALL     | 0 | 0 |
| 270 | 1 | 0 | 0 | 0.517143 | FALSE | 0 | MAPKAPK5 | 0 | 0 |
| 270 | 1 | 0 | 0 | 0.517143 | FALSE | 0 | MED16    | 0 | 0 |
| 270 | 1 | 0 | 0 | 0.517143 | FALSE | 0 | MIER2    | 0 | 0 |
| 270 | 1 | 0 | 0 | 0.517143 | FALSE | 0 | MRPS23   | 0 | 0 |
| 270 | 1 | 0 | 0 | 0.517143 | FALSE | 0 | NMNAT1   | 0 | 0 |
| 270 | 1 | 0 | 0 | 0.517143 | FALSE | 0 | NMUR1    | 0 | 0 |
| 270 | 1 | 0 | 0 | 0.517143 | FALSE | 0 | NT5DC3   | 0 | 0 |
| 270 | 1 | 0 | 0 | 0.517143 | FALSE | 0 | OGFRL1   | 0 | 0 |
| 270 | 1 | 0 | 0 | 0.517143 | FALSE | 0 | PACSIN1  | 0 | 0 |
| 270 | 1 | 0 | 0 | 0.517143 | FALSE | 0 | PAOX     | 0 | 0 |
| 270 | 1 | 0 | 0 | 0.517143 | FALSE | 0 | PCDHB11  | 0 | 0 |
| 270 | 1 | 0 | 0 | 0.517143 | FALSE | 0 | PDE4C    | 0 | 0 |
| 270 | 1 | 0 | 0 | 0.517143 | FALSE | 0 | PDE6B    | 0 | 0 |
| 270 | 1 | 0 | 0 | 0.517143 | FALSE | 0 | PEAK3    | 0 | 0 |
| 270 | 1 | 0 | 0 | 0.517143 | FALSE | 0 | PHF7     | 0 | 0 |
| 270 | 1 | 0 | 0 | 0.517143 | FALSE | 0 | PHYHIP   | 0 | 0 |
| 270 | 1 | 0 | 0 | 0.517143 | FALSE | 0 | PIGO     | 0 | 0 |
| 270 | 1 | 0 | 0 | 0.517143 | FALSE | 0 | PLAA     | 0 | 0 |
| 270 | 1 | 0 | 0 | 0.517143 | FALSE | 0 | PLD6     | 0 | 0 |
| 270 | 1 | 0 | 0 | 0.517143 | FALSE | 0 | PLEKHG3  | 0 | 0 |

|     |   |   |   |          |       |   |         |   |   |
|-----|---|---|---|----------|-------|---|---------|---|---|
| 270 | 1 | 0 | 0 | 0.517143 | FALSE | 0 | POU3F3  | 0 | 0 |
| 270 | 1 | 0 | 0 | 0.517143 | FALSE | 0 | PPFIBP1 | 0 | 0 |
| 270 | 1 | 0 | 0 | 0.517143 | FALSE | 0 | PPP1R3G | 0 | 0 |
| 270 | 1 | 0 | 0 | 0.517143 | FALSE | 0 | PRPS1L1 | 0 | 0 |
| 270 | 1 | 0 | 0 | 0.517143 | FALSE | 0 | PRR13   | 0 | 0 |
| 270 | 1 | 0 | 0 | 0.517143 | FALSE | 0 | PSMG1   | 0 | 0 |
| 270 | 1 | 0 | 0 | 0.517143 | FALSE | 0 | PTGR2   | 0 | 0 |
| 270 | 1 | 0 | 0 | 0.517143 | FALSE | 0 | RBM28   | 0 | 0 |
| 270 | 1 | 0 | 0 | 0.517143 | FALSE | 0 | RBM4B   | 0 | 0 |
| 270 | 1 | 0 | 0 | 0.517143 | FALSE | 0 | RBMS2   | 0 | 0 |
| 270 | 1 | 0 | 0 | 0.517143 | FALSE | 0 | RNF149  | 0 | 0 |
| 270 | 1 | 0 | 0 | 0.517143 | FALSE | 0 | RNF20   | 0 | 0 |
| 270 | 1 | 0 | 0 | 0.517143 | FALSE | 0 | RPH3AL  | 0 | 0 |
| 270 | 1 | 0 | 0 | 0.517143 | FALSE | 0 | RTCA    | 0 | 0 |
| 270 | 1 | 0 | 0 | 0.517143 | FALSE | 0 | S100A16 | 0 | 0 |
| 270 | 1 | 0 | 0 | 0.517143 | FALSE | 0 | SCD5    | 0 | 0 |
| 270 | 1 | 0 | 0 | 0.517143 | FALSE | 0 | SCO1    | 0 | 0 |
| 270 | 1 | 0 | 0 | 0.517143 | FALSE | 0 | SCUBE3  | 0 | 0 |
| 270 | 1 | 0 | 0 | 0.517143 | FALSE | 0 | SIPA1   | 0 | 0 |
| 270 | 1 | 0 | 0 | 0.517143 | FALSE | 0 | SIRT3   | 0 | 0 |
| 270 | 1 | 0 | 0 | 0.517143 | FALSE | 0 | SLC29A4 | 0 | 0 |
| 270 | 1 | 0 | 0 | 0.517143 | FALSE | 0 | SMC5    | 0 | 0 |
| 270 | 1 | 0 | 0 | 0.517143 | FALSE | 0 | SNAP23  | 0 | 0 |
| 270 | 1 | 0 | 0 | 0.517143 | FALSE | 0 | SPRED1  | 0 | 0 |
| 270 | 1 | 0 | 0 | 0.517143 | FALSE | 0 | SRPRA   | 0 | 0 |
| 270 | 1 | 0 | 0 | 0.517143 | FALSE | 0 | SUGT1   | 0 | 0 |
| 270 | 1 | 0 | 0 | 0.517143 | FALSE | 0 | SUSD1   | 0 | 0 |
| 270 | 1 | 0 | 0 | 0.517143 | FALSE | 0 | SYAP1   | 0 | 0 |
| 270 | 1 | 0 | 0 | 0.517143 | FALSE | 0 | TBC1D19 | 0 | 0 |
| 270 | 1 | 0 | 0 | 0.517143 | FALSE | 0 | TCF23   | 0 | 0 |
| 270 | 1 | 0 | 0 | 0.517143 | FALSE | 0 | TGS1    | 0 | 0 |
| 270 | 1 | 0 | 0 | 0.517143 | FALSE | 0 | THSD4   | 0 | 0 |
| 270 | 1 | 0 | 0 | 0.517143 | FALSE | 0 | TIAL1   | 0 | 0 |
| 270 | 1 | 0 | 0 | 0.517143 | FALSE | 0 | TLN2    | 0 | 0 |
| 270 | 1 | 0 | 0 | 0.517143 | FALSE | 0 | TMEM44  | 0 | 0 |
| 270 | 1 | 0 | 0 | 0.517143 | FALSE | 0 | TNFSF15 | 0 | 0 |
| 270 | 1 | 0 | 0 | 0.517143 | FALSE | 0 | TNNI1   | 0 | 0 |
| 270 | 1 | 0 | 0 | 0.517143 | FALSE | 0 | TRIM72  | 0 | 0 |
| 270 | 1 | 0 | 0 | 0.517143 | FALSE | 0 | TRUB2   | 0 | 0 |
| 270 | 1 | 0 | 0 | 0.517143 | FALSE | 0 | TLL1    | 0 | 0 |
| 270 | 1 | 0 | 0 | 0.517143 | FALSE | 0 | TYRO3   | 0 | 0 |
| 270 | 1 | 0 | 0 | 0.517143 | FALSE | 0 | UQCRQ   | 0 | 0 |
| 270 | 1 | 0 | 0 | 0.517143 | FALSE | 0 | USP1    | 0 | 0 |
| 270 | 1 | 0 | 0 | 0.517143 | FALSE | 0 | VENTX   | 0 | 0 |
| 270 | 1 | 0 | 0 | 0.517143 | FALSE | 0 | VPS8    | 0 | 0 |
| 270 | 1 | 0 | 0 | 0.517143 | FALSE | 0 | ZNF141  | 0 | 0 |
| 270 | 1 | 0 | 0 | 0.517143 | FALSE | 0 | ZNF280C | 0 | 0 |



|          |     |   |   |          |       |   |                     |          |   |
|----------|-----|---|---|----------|-------|---|---------------------|----------|---|
| 270      | 1   | 0 | 0 | 0.517143 | FALSE | 0 | ZNF35               | 0        | 0 |
| 270      | 1   | 0 | 0 | 0.517143 | FALSE | 0 | ZNF394              | 0        | 0 |
| 2.247423 | 97  | 0 | 0 | 0.66424  | TRUE  | 0 | hsa-miR-67 37972912 | 0.089102 |   |
| 270      | 1   | 0 | 0 | 0.517143 | FALSE | 0 | ZNF548              | 0        | 0 |
| 270      | 1   | 0 | 0 | 0.517143 | FALSE | 0 | ZNF713              | 0        | 0 |
| 270      | 1   | 0 | 0 | 0.517143 | FALSE | 0 | ZNF788              | 0        | 0 |
| 270      | 1   | 0 | 0 | 0.517143 | FALSE | 0 | ZNF790              | 0        | 0 |
| 97       | 1   | 0 | 0 | 0.497604 | FALSE | 0 | ADAMTS7             | 0        | 0 |
| 97       | 1   | 0 | 0 | 0.497604 | FALSE | 0 | CASC3               | 0        | 0 |
| 97       | 1   | 0 | 0 | 0.497604 | FALSE | 0 | DDX39A              | 0        | 0 |
| 97       | 1   | 0 | 0 | 0.497604 | FALSE | 0 | DGKZ                | 0        | 0 |
| 97       | 1   | 0 | 0 | 0.497604 | FALSE | 0 | DIS3L               | 0        | 0 |
| 97       | 1   | 0 | 0 | 0.497604 | FALSE | 0 | FAM208A             | 0        | 0 |
| 97       | 1   | 0 | 0 | 0.497604 | FALSE | 0 | FTO                 | 0        | 0 |
| 97       | 1   | 0 | 0 | 0.497604 | FALSE | 0 | GRB2                | 0        | 0 |
| 97       | 1   | 0 | 0 | 0.497604 | FALSE | 0 | GSG2                | 0        | 0 |
| 97       | 1   | 0 | 0 | 0.497604 | FALSE | 0 | HUS1                | 0        | 0 |
| 97       | 1   | 0 | 0 | 0.497604 | FALSE | 0 | MAN1B1              | 0        | 0 |
| 97       | 1   | 0 | 0 | 0.497604 | FALSE | 0 | MLXIP               | 0        | 0 |
| 97       | 1   | 0 | 0 | 0.497604 | FALSE | 0 | MYSM1               | 0        | 0 |
| 97       | 1   | 0 | 0 | 0.497604 | FALSE | 0 | NCEH1               | 0        | 0 |
| 97       | 1   | 0 | 0 | 0.497604 | FALSE | 0 | NHS                 | 0        | 0 |
| 97       | 1   | 0 | 0 | 0.497604 | FALSE | 0 | NIFK                | 0        | 0 |
| 97       | 1   | 0 | 0 | 0.497604 | FALSE | 0 | NIN                 | 0        | 0 |
| 97       | 1   | 0 | 0 | 0.497604 | FALSE | 0 | PATZ1               | 0        | 0 |
| 97       | 1   | 0 | 0 | 0.497604 | FALSE | 0 | PIP5K1A             | 0        | 0 |
| 97       | 1   | 0 | 0 | 0.497604 | FALSE | 0 | PLEKHA6             | 0        | 0 |
| 97       | 1   | 0 | 0 | 0.497604 | FALSE | 0 | PRMT1               | 0        | 0 |
| 97       | 1   | 0 | 0 | 0.497604 | FALSE | 0 | PTPRD               | 0        | 0 |
| 97       | 1   | 0 | 0 | 0.497604 | FALSE | 0 | PVR                 | 0        | 0 |
| 97       | 1   | 0 | 0 | 0.497604 | FALSE | 0 | RASGRF1             | 0        | 0 |
| 97       | 1   | 0 | 0 | 0.497604 | FALSE | 0 | S100A6              | 0        | 0 |
| 97       | 1   | 0 | 0 | 0.497604 | FALSE | 0 | SEMA5A              | 0        | 0 |
| 97       | 1   | 0 | 0 | 0.497604 | FALSE | 0 | SORCS2              | 0        | 0 |
| 97       | 1   | 0 | 0 | 0.497604 | FALSE | 0 | TMEM223             | 0        | 0 |
| 97       | 1   | 0 | 0 | 0.497604 | FALSE | 0 | TRAF2               | 0        | 0 |
| 97       | 1   | 0 | 0 | 0.497604 | FALSE | 0 | USP24               | 0        | 0 |
| 97       | 1   | 0 | 0 | 0.497604 | FALSE | 0 | UTP18               | 0        | 0 |
| 97       | 1   | 0 | 0 | 0.497604 | FALSE | 0 | ZFC3H1              | 0        | 0 |
| 2.138504 | 722 | 0 | 0 | 0.711551 | TRUE  | 0 | hsa-miR-67 7.29E+08 | 0.066971 |   |
| 722      | 1   | 0 | 0 | 0.544916 | FALSE | 0 | 6-Mar               | 0        | 0 |
| 722      | 1   | 0 | 0 | 0.544916 | FALSE | 0 | ABHD14A-7           | 0        | 0 |
| 722      | 1   | 0 | 0 | 0.544916 | FALSE | 0 | ACY1                | 0        | 0 |
| 722      | 1   | 0 | 0 | 0.544916 | FALSE | 0 | ADAM11              | 0        | 0 |
| 722      | 1   | 0 | 0 | 0.544916 | FALSE | 0 | ADAMTS5             | 0        | 0 |
| 722      | 1   | 0 | 0 | 0.544916 | FALSE | 0 | ADCY1               | 0        | 0 |
| 722      | 1   | 0 | 0 | 0.544916 | FALSE | 0 | ADCY6               | 0        | 0 |

|     |   |   |   |          |       |   |           |   |   |
|-----|---|---|---|----------|-------|---|-----------|---|---|
| 722 | 1 | 0 | 0 | 0.544916 | FALSE | 0 | AGFG2     | 0 | 0 |
| 722 | 1 | 0 | 0 | 0.544916 | FALSE | 0 | AMOT      | 0 | 0 |
| 722 | 1 | 0 | 0 | 0.544916 | FALSE | 0 | ANGEL1    | 0 | 0 |
| 722 | 1 | 0 | 0 | 0.544916 | FALSE | 0 | ANXA6     | 0 | 0 |
| 722 | 1 | 0 | 0 | 0.544916 | FALSE | 0 | APH1B     | 0 | 0 |
| 722 | 1 | 0 | 0 | 0.544916 | FALSE | 0 | ARFIP1    | 0 | 0 |
| 722 | 1 | 0 | 0 | 0.544916 | FALSE | 0 | ARL6IP4   | 0 | 0 |
| 722 | 1 | 0 | 0 | 0.544916 | FALSE | 0 | ARV1      | 0 | 0 |
| 722 | 1 | 0 | 0 | 0.544916 | FALSE | 0 | ASAH2     | 0 | 0 |
| 722 | 1 | 0 | 0 | 0.544916 | FALSE | 0 | ASF1B     | 0 | 0 |
| 722 | 1 | 0 | 0 | 0.544916 | FALSE | 0 | ATAD2     | 0 | 0 |
| 722 | 1 | 0 | 0 | 0.544916 | FALSE | 0 | ATN1      | 0 | 0 |
| 722 | 1 | 0 | 0 | 0.544916 | FALSE | 0 | ATP1B3    | 0 | 0 |
| 722 | 1 | 0 | 0 | 0.544916 | FALSE | 0 | ATP5S     | 0 | 0 |
| 722 | 1 | 0 | 0 | 0.544916 | FALSE | 0 | ATP6AP1   | 0 | 0 |
| 722 | 1 | 0 | 0 | 0.544916 | FALSE | 0 | ATP6V1C1  | 0 | 0 |
| 722 | 1 | 0 | 0 | 0.544916 | FALSE | 0 | AUP1      | 0 | 0 |
| 722 | 1 | 0 | 0 | 0.544916 | FALSE | 0 | AURKA     | 0 | 0 |
| 722 | 1 | 0 | 0 | 0.544916 | FALSE | 0 | B4GALNT4  | 0 | 0 |
| 722 | 1 | 0 | 0 | 0.544916 | FALSE | 0 | BCAP31    | 0 | 0 |
| 722 | 1 | 0 | 0 | 0.544916 | FALSE | 0 | BCL2L2-PA | 0 | 0 |
| 722 | 1 | 0 | 0 | 0.544916 | FALSE | 0 | BCR       | 0 | 0 |
| 722 | 1 | 0 | 0 | 0.544916 | FALSE | 0 | BET1      | 0 | 0 |
| 722 | 1 | 0 | 0 | 0.544916 | FALSE | 0 | BMP10     | 0 | 0 |
| 722 | 1 | 0 | 0 | 0.544916 | FALSE | 0 | BMP8A     | 0 | 0 |
| 722 | 1 | 0 | 0 | 0.544916 | FALSE | 0 | BSDC1     | 0 | 0 |
| 722 | 1 | 0 | 0 | 0.544916 | FALSE | 0 | BTBD16    | 0 | 0 |
| 722 | 1 | 0 | 0 | 0.544916 | FALSE | 0 | C11orf24  | 0 | 0 |
| 722 | 1 | 0 | 0 | 0.544916 | FALSE | 0 | C17orf58  | 0 | 0 |
| 722 | 1 | 0 | 0 | 0.544916 | FALSE | 0 | C17orf67  | 0 | 0 |
| 722 | 1 | 0 | 0 | 0.544916 | FALSE | 0 | C1orf85   | 0 | 0 |
| 722 | 1 | 0 | 0 | 0.544916 | FALSE | 0 | C1QTNF1   | 0 | 0 |
| 722 | 1 | 0 | 0 | 0.544916 | FALSE | 0 | C8orf58   | 0 | 0 |
| 722 | 1 | 0 | 0 | 0.544916 | FALSE | 0 | C8orf82   | 0 | 0 |
| 722 | 1 | 0 | 0 | 0.544916 | FALSE | 0 | CCDC58    | 0 | 0 |
| 722 | 1 | 0 | 0 | 0.544916 | FALSE | 0 | CCHCR1    | 0 | 0 |
| 722 | 1 | 0 | 0 | 0.544916 | FALSE | 0 | CCT3      | 0 | 0 |
| 722 | 1 | 0 | 0 | 0.544916 | FALSE | 0 | CDC6      | 0 | 0 |
| 722 | 1 | 0 | 0 | 0.544916 | FALSE | 0 | CDCA7L    | 0 | 0 |
| 722 | 1 | 0 | 0 | 0.544916 | FALSE | 0 | CDH13     | 0 | 0 |
| 722 | 1 | 0 | 0 | 0.544916 | FALSE | 0 | CDK2AP2   | 0 | 0 |
| 722 | 1 | 0 | 0 | 0.544916 | FALSE | 0 | CDKN2A    | 0 | 0 |
| 722 | 1 | 0 | 0 | 0.544916 | FALSE | 0 | CENPT     | 0 | 0 |
| 722 | 1 | 0 | 0 | 0.544916 | FALSE | 0 | CEP120    | 0 | 0 |
| 722 | 1 | 0 | 0 | 0.544916 | FALSE | 0 | CEP128    | 0 | 0 |
| 722 | 1 | 0 | 0 | 0.544916 | FALSE | 0 | CEP85     | 0 | 0 |
| 722 | 1 | 0 | 0 | 0.544916 | FALSE | 0 | CHCHD2    | 0 | 0 |

|     |   |   |   |          |       |   |           |   |   |
|-----|---|---|---|----------|-------|---|-----------|---|---|
| 722 | 1 | 0 | 0 | 0.544916 | FALSE | 0 | CHTF18    | 0 | 0 |
| 722 | 1 | 0 | 0 | 0.544916 | FALSE | 0 | CLNS1A    | 0 | 0 |
| 722 | 1 | 0 | 0 | 0.544916 | FALSE | 0 | CLPTM1    | 0 | 0 |
| 722 | 1 | 0 | 0 | 0.544916 | FALSE | 0 | COA4      | 0 | 0 |
| 722 | 1 | 0 | 0 | 0.544916 | FALSE | 0 | COG4      | 0 | 0 |
| 722 | 1 | 0 | 0 | 0.544916 | FALSE | 0 | COL8A2    | 0 | 0 |
| 722 | 1 | 0 | 0 | 0.544916 | FALSE | 0 | CPNE2     | 0 | 0 |
| 722 | 1 | 0 | 0 | 0.544916 | FALSE | 0 | CREG1     | 0 | 0 |
| 722 | 1 | 0 | 0 | 0.544916 | FALSE | 0 | CSK       | 0 | 0 |
| 722 | 1 | 0 | 0 | 0.544916 | FALSE | 0 | CTDSP2    | 0 | 0 |
| 722 | 1 | 0 | 0 | 0.544916 | FALSE | 0 | CTSD      | 0 | 0 |
| 722 | 1 | 0 | 0 | 0.544916 | FALSE | 0 | CUL3      | 0 | 0 |
| 722 | 1 | 0 | 0 | 0.544916 | FALSE | 0 | CYP46A1   | 0 | 0 |
| 722 | 1 | 0 | 0 | 0.544916 | FALSE | 0 | CYTH2     | 0 | 0 |
| 722 | 1 | 0 | 0 | 0.544916 | FALSE | 0 | DAZAP1    | 0 | 0 |
| 722 | 1 | 0 | 0 | 0.544916 | FALSE | 0 | DCAF17    | 0 | 0 |
| 722 | 1 | 0 | 0 | 0.544916 | FALSE | 0 | DDHD2     | 0 | 0 |
| 722 | 1 | 0 | 0 | 0.544916 | FALSE | 0 | DDX24     | 0 | 0 |
| 722 | 1 | 0 | 0 | 0.544916 | FALSE | 0 | DHCR24    | 0 | 0 |
| 722 | 1 | 0 | 0 | 0.544916 | FALSE | 0 | DLX5      | 0 | 0 |
| 722 | 1 | 0 | 0 | 0.544916 | FALSE | 0 | DNAJB9    | 0 | 0 |
| 722 | 1 | 0 | 0 | 0.544916 | FALSE | 0 | DNAJC11   | 0 | 0 |
| 722 | 1 | 0 | 0 | 0.544916 | FALSE | 0 | DNAJC13   | 0 | 0 |
| 722 | 1 | 0 | 0 | 0.544916 | FALSE | 0 | DPP9      | 0 | 0 |
| 722 | 1 | 0 | 0 | 0.544916 | FALSE | 0 | DSG2      | 0 | 0 |
| 722 | 1 | 0 | 0 | 0.544916 | FALSE | 0 | DSTN      | 0 | 0 |
| 722 | 1 | 0 | 0 | 0.544916 | FALSE | 0 | EFHD2     | 0 | 0 |
| 722 | 1 | 0 | 0 | 0.544916 | FALSE | 0 | EGR1      | 0 | 0 |
| 722 | 1 | 0 | 0 | 0.544916 | FALSE | 0 | EIF2S2    | 0 | 0 |
| 722 | 1 | 0 | 0 | 0.544916 | FALSE | 0 | EIF3D     | 0 | 0 |
| 722 | 1 | 0 | 0 | 0.544916 | FALSE | 0 | EMX1      | 0 | 0 |
| 722 | 1 | 0 | 0 | 0.544916 | FALSE | 0 | EPHX4     | 0 | 0 |
| 722 | 1 | 0 | 0 | 0.544916 | FALSE | 0 | EPT1      | 0 | 0 |
| 722 | 1 | 0 | 0 | 0.544916 | FALSE | 0 | ERCC6     | 0 | 0 |
| 722 | 1 | 0 | 0 | 0.544916 | FALSE | 0 | ERP29     | 0 | 0 |
| 722 | 1 | 0 | 0 | 0.544916 | FALSE | 0 | FAM47E-ST | 0 | 0 |
| 722 | 1 | 0 | 0 | 0.544916 | FALSE | 0 | FARSB     | 0 | 0 |
| 722 | 1 | 0 | 0 | 0.544916 | FALSE | 0 | FBLN1     | 0 | 0 |
| 722 | 1 | 0 | 0 | 0.544916 | FALSE | 0 | FBXO36    | 0 | 0 |
| 722 | 1 | 0 | 0 | 0.544916 | FALSE | 0 | FGF19     | 0 | 0 |
| 722 | 1 | 0 | 0 | 0.544916 | FALSE | 0 | FUT8      | 0 | 0 |
| 722 | 1 | 0 | 0 | 0.544916 | FALSE | 0 | GFM1      | 0 | 0 |
| 722 | 1 | 0 | 0 | 0.544916 | FALSE | 0 | GOLIM4    | 0 | 0 |
| 722 | 1 | 0 | 0 | 0.544916 | FALSE | 0 | GOLPH3L   | 0 | 0 |
| 722 | 1 | 0 | 0 | 0.544916 | FALSE | 0 | GON4L     | 0 | 0 |
| 722 | 1 | 0 | 0 | 0.544916 | FALSE | 0 | GPATCH2   | 0 | 0 |
| 722 | 1 | 0 | 0 | 0.544916 | FALSE | 0 | GPI       | 0 | 0 |

|     |   |   |   |          |       |   |           |   |   |
|-----|---|---|---|----------|-------|---|-----------|---|---|
| 722 | 1 | 0 | 0 | 0.544916 | FALSE | 0 | GPR107    | 0 | 0 |
| 722 | 1 | 0 | 0 | 0.544916 | FALSE | 0 | GRHL1     | 0 | 0 |
| 722 | 1 | 0 | 0 | 0.544916 | FALSE | 0 | GRPR      | 0 | 0 |
| 722 | 1 | 0 | 0 | 0.544916 | FALSE | 0 | GRWD1     | 0 | 0 |
| 722 | 1 | 0 | 0 | 0.544916 | FALSE | 0 | GTPBP2    | 0 | 0 |
| 722 | 1 | 0 | 0 | 0.544916 | FALSE | 0 | GYS1      | 0 | 0 |
| 722 | 1 | 0 | 0 | 0.544916 | FALSE | 0 | HCN2      | 0 | 0 |
| 722 | 1 | 0 | 0 | 0.544916 | FALSE | 0 | HDAC1     | 0 | 0 |
| 722 | 1 | 0 | 0 | 0.544916 | FALSE | 0 | HIST1H3B  | 0 | 0 |
| 722 | 1 | 0 | 0 | 0.544916 | FALSE | 0 | HIST1H3J  | 0 | 0 |
| 722 | 1 | 0 | 0 | 0.544916 | FALSE | 0 | HIST2H2AA | 0 | 0 |
| 722 | 1 | 0 | 0 | 0.544916 | FALSE | 0 | HJURP     | 0 | 0 |
| 722 | 1 | 0 | 0 | 0.544916 | FALSE | 0 | HNRNPL    | 0 | 0 |
| 722 | 1 | 0 | 0 | 0.544916 | FALSE | 0 | HOXB5     | 0 | 0 |
| 722 | 1 | 0 | 0 | 0.544916 | FALSE | 0 | HOXD9     | 0 | 0 |
| 722 | 1 | 0 | 0 | 0.544916 | FALSE | 0 | HRH2      | 0 | 0 |
| 722 | 1 | 0 | 0 | 0.544916 | FALSE | 0 | HSPB8     | 0 | 0 |
| 722 | 1 | 0 | 0 | 0.544916 | FALSE | 0 | IAH1      | 0 | 0 |
| 722 | 1 | 0 | 0 | 0.544916 | FALSE | 0 | IARS2     | 0 | 0 |
| 722 | 1 | 0 | 0 | 0.544916 | FALSE | 0 | ICMT      | 0 | 0 |
| 722 | 1 | 0 | 0 | 0.544916 | FALSE | 0 | ICOSLG    | 0 | 0 |
| 722 | 1 | 0 | 0 | 0.544916 | FALSE | 0 | IGSF8     | 0 | 0 |
| 722 | 1 | 0 | 0 | 0.544916 | FALSE | 0 | IKZF2     | 0 | 0 |
| 722 | 1 | 0 | 0 | 0.544916 | FALSE | 0 | IL15RA    | 0 | 0 |
| 722 | 1 | 0 | 0 | 0.544916 | FALSE | 0 | INSR      | 0 | 0 |
| 722 | 1 | 0 | 0 | 0.544916 | FALSE | 0 | IST1      | 0 | 0 |
| 722 | 1 | 0 | 0 | 0.544916 | FALSE | 0 | ISYNA1    | 0 | 0 |
| 722 | 1 | 0 | 0 | 0.544916 | FALSE | 0 | JKAMP     | 0 | 0 |
| 722 | 1 | 0 | 0 | 0.544916 | FALSE | 0 | JRK       | 0 | 0 |
| 722 | 1 | 0 | 0 | 0.544916 | FALSE | 0 | KHDRBS3   | 0 | 0 |
| 722 | 1 | 0 | 0 | 0.544916 | FALSE | 0 | KIAA1045  | 0 | 0 |
| 722 | 1 | 0 | 0 | 0.544916 | FALSE | 0 | KIF6      | 0 | 0 |
| 722 | 1 | 0 | 0 | 0.544916 | FALSE | 0 | KLHL18    | 0 | 0 |
| 722 | 1 | 0 | 0 | 0.544916 | FALSE | 0 | KLHL21    | 0 | 0 |
| 722 | 1 | 0 | 0 | 0.544916 | FALSE | 0 | KLHL7     | 0 | 0 |
| 722 | 1 | 0 | 0 | 0.544916 | FALSE | 0 | KPNB1     | 0 | 0 |
| 722 | 1 | 0 | 0 | 0.544916 | FALSE | 0 | LANCL1    | 0 | 0 |
| 722 | 1 | 0 | 0 | 0.544916 | FALSE | 0 | LASP1     | 0 | 0 |
| 722 | 1 | 0 | 0 | 0.544916 | FALSE | 0 | LCMT2     | 0 | 0 |
| 722 | 1 | 0 | 0 | 0.544916 | FALSE | 0 | LMAN2L    | 0 | 0 |
| 722 | 1 | 0 | 0 | 0.544916 | FALSE | 0 | LRPAP1    | 0 | 0 |
| 722 | 1 | 0 | 0 | 0.544916 | FALSE | 0 | LRRN2     | 0 | 0 |
| 722 | 1 | 0 | 0 | 0.544916 | FALSE | 0 | LYSMD1    | 0 | 0 |
| 722 | 1 | 0 | 0 | 0.544916 | FALSE | 0 | MAFG      | 0 | 0 |
| 722 | 1 | 0 | 0 | 0.544916 | FALSE | 0 | MAOB      | 0 | 0 |
| 722 | 1 | 0 | 0 | 0.544916 | FALSE | 0 | MARS      | 0 | 0 |
| 722 | 1 | 0 | 0 | 0.544916 | FALSE | 0 | MARVELD1  | 0 | 0 |

|     |   |   |   |          |       |   |         |   |   |
|-----|---|---|---|----------|-------|---|---------|---|---|
| 722 | 1 | 0 | 0 | 0.544916 | FALSE | 0 | MELTF   | 0 | 0 |
| 722 | 1 | 0 | 0 | 0.544916 | FALSE | 0 | MEPCE   | 0 | 0 |
| 722 | 1 | 0 | 0 | 0.544916 | FALSE | 0 | METTL23 | 0 | 0 |
| 722 | 1 | 0 | 0 | 0.544916 | FALSE | 0 | MKKS    | 0 | 0 |
| 722 | 1 | 0 | 0 | 0.544916 | FALSE | 0 | MOSPD3  | 0 | 0 |
| 722 | 1 | 0 | 0 | 0.544916 | FALSE | 0 | MRM1    | 0 | 0 |
| 722 | 1 | 0 | 0 | 0.544916 | FALSE | 0 | MRPS34  | 0 | 0 |
| 722 | 1 | 0 | 0 | 0.544916 | FALSE | 0 | MS4A1   | 0 | 0 |
| 722 | 1 | 0 | 0 | 0.544916 | FALSE | 0 | MSL1    | 0 | 0 |
| 722 | 1 | 0 | 0 | 0.544916 | FALSE | 0 | NBEAL2  | 0 | 0 |
| 722 | 1 | 0 | 0 | 0.544916 | FALSE | 0 | NCLN    | 0 | 0 |
| 722 | 1 | 0 | 0 | 0.544916 | FALSE | 0 | NCS1    | 0 | 0 |
| 722 | 1 | 0 | 0 | 0.544916 | FALSE | 0 | NDOR1   | 0 | 0 |
| 722 | 1 | 0 | 0 | 0.544916 | FALSE | 0 | NDUFA10 | 0 | 0 |
| 722 | 1 | 0 | 0 | 0.544916 | FALSE | 0 | NDUFA3  | 0 | 0 |
| 722 | 1 | 0 | 0 | 0.544916 | FALSE | 0 | NDUFAF3 | 0 | 0 |
| 722 | 1 | 0 | 0 | 0.544916 | FALSE | 0 | NEDD8   | 0 | 0 |
| 722 | 1 | 0 | 0 | 0.544916 | FALSE | 0 | NEO1    | 0 | 0 |
| 722 | 1 | 0 | 0 | 0.544916 | FALSE | 0 | NES     | 0 | 0 |
| 722 | 1 | 0 | 0 | 0.544916 | FALSE | 0 | NET1    | 0 | 0 |
| 722 | 1 | 0 | 0 | 0.544916 | FALSE | 0 | NIF3L1  | 0 | 0 |
| 722 | 1 | 0 | 0 | 0.544916 | FALSE | 0 | NR4A3   | 0 | 0 |
| 722 | 1 | 0 | 0 | 0.544916 | FALSE | 0 | NRSN2   | 0 | 0 |
| 722 | 1 | 0 | 0 | 0.544916 | FALSE | 0 | NSF     | 0 | 0 |
| 722 | 1 | 0 | 0 | 0.544916 | FALSE | 0 | NSUN5   | 0 | 0 |
| 722 | 1 | 0 | 0 | 0.544916 | FALSE | 0 | ODC1    | 0 | 0 |
| 722 | 1 | 0 | 0 | 0.544916 | FALSE | 0 | OGDH    | 0 | 0 |
| 722 | 1 | 0 | 0 | 0.544916 | FALSE | 0 | ONECUT2 | 0 | 0 |
| 722 | 1 | 0 | 0 | 0.544916 | FALSE | 0 | OPA1    | 0 | 0 |
| 722 | 1 | 0 | 0 | 0.544916 | FALSE | 0 | OR2D2   | 0 | 0 |
| 722 | 1 | 0 | 0 | 0.544916 | FALSE | 0 | OSBP    | 0 | 0 |
| 722 | 1 | 0 | 0 | 0.544916 | FALSE | 0 | PAX1    | 0 | 0 |
| 722 | 1 | 0 | 0 | 0.544916 | FALSE | 0 | PCF11   | 0 | 0 |
| 722 | 1 | 0 | 0 | 0.544916 | FALSE | 0 | PCNXL4  | 0 | 0 |
| 722 | 1 | 0 | 0 | 0.544916 | FALSE | 0 | PFDN5   | 0 | 0 |
| 722 | 1 | 0 | 0 | 0.544916 | FALSE | 0 | PHF10   | 0 | 0 |
| 722 | 1 | 0 | 0 | 0.544916 | FALSE | 0 | PHYKPL  | 0 | 0 |
| 722 | 1 | 0 | 0 | 0.544916 | FALSE | 0 | PIEZO1  | 0 | 0 |
| 722 | 1 | 0 | 0 | 0.544916 | FALSE | 0 | PIP4K2C | 0 | 0 |
| 722 | 1 | 0 | 0 | 0.544916 | FALSE | 0 | PITHD1  | 0 | 0 |
| 722 | 1 | 0 | 0 | 0.544916 | FALSE | 0 | PITPNA  | 0 | 0 |
| 722 | 1 | 0 | 0 | 0.544916 | FALSE | 0 | PKNOX2  | 0 | 0 |
| 722 | 1 | 0 | 0 | 0.544916 | FALSE | 0 | PKP3    | 0 | 0 |
| 722 | 1 | 0 | 0 | 0.544916 | FALSE | 0 | PLD1    | 0 | 0 |
| 722 | 1 | 0 | 0 | 0.544916 | FALSE | 0 | POLD1   | 0 | 0 |
| 722 | 1 | 0 | 0 | 0.544916 | FALSE | 0 | POR     | 0 | 0 |
| 722 | 1 | 0 | 0 | 0.544916 | FALSE | 0 | PPIF    | 0 | 0 |

|     |   |   |   |          |       |   |           |   |   |
|-----|---|---|---|----------|-------|---|-----------|---|---|
| 722 | 1 | 0 | 0 | 0.544916 | FALSE | 0 | PPP1R12C  | 0 | 0 |
| 722 | 1 | 0 | 0 | 0.544916 | FALSE | 0 | PPP1R18   | 0 | 0 |
| 722 | 1 | 0 | 0 | 0.544916 | FALSE | 0 | PRKAR1A   | 0 | 0 |
| 722 | 1 | 0 | 0 | 0.544916 | FALSE | 0 | PSD4      | 0 | 0 |
| 722 | 1 | 0 | 0 | 0.544916 | FALSE | 0 | PSMD2     | 0 | 0 |
| 722 | 1 | 0 | 0 | 0.544916 | FALSE | 0 | PSMF1     | 0 | 0 |
| 722 | 1 | 0 | 0 | 0.544916 | FALSE | 0 | PTK2B     | 0 | 0 |
| 722 | 1 | 0 | 0 | 0.544916 | FALSE | 0 | QRSL1     | 0 | 0 |
| 722 | 1 | 0 | 0 | 0.544916 | FALSE | 0 | R3HDM2    | 0 | 0 |
| 722 | 1 | 0 | 0 | 0.544916 | FALSE | 0 | RAB3B     | 0 | 0 |
| 722 | 1 | 0 | 0 | 0.544916 | FALSE | 0 | RABL6     | 0 | 0 |
| 722 | 1 | 0 | 0 | 0.544916 | FALSE | 0 | RAD23A    | 0 | 0 |
| 722 | 1 | 0 | 0 | 0.544916 | FALSE | 0 | RADIL     | 0 | 0 |
| 722 | 1 | 0 | 0 | 0.544916 | FALSE | 0 | RASSF3    | 0 | 0 |
| 722 | 1 | 0 | 0 | 0.544916 | FALSE | 0 | RAVER1    | 0 | 0 |
| 722 | 1 | 0 | 0 | 0.544916 | FALSE | 0 | RBBP5     | 0 | 0 |
| 722 | 1 | 0 | 0 | 0.544916 | FALSE | 0 | RELT      | 0 | 0 |
| 722 | 1 | 0 | 0 | 0.544916 | FALSE | 0 | RFWD2     | 0 | 0 |
| 722 | 1 | 0 | 0 | 0.544916 | FALSE | 0 | RFX6      | 0 | 0 |
| 722 | 1 | 0 | 0 | 0.544916 | FALSE | 0 | RLF       | 0 | 0 |
| 722 | 1 | 0 | 0 | 0.544916 | FALSE | 0 | RNASEH2C  | 0 | 0 |
| 722 | 1 | 0 | 0 | 0.544916 | FALSE | 0 | RP11-546B | 0 | 0 |
| 722 | 1 | 0 | 0 | 0.544916 | FALSE | 0 | RPL23A    | 0 | 0 |
| 722 | 1 | 0 | 0 | 0.544916 | FALSE | 0 | RPL28     | 0 | 0 |
| 722 | 1 | 0 | 0 | 0.544916 | FALSE | 0 | RPL35A    | 0 | 0 |
| 722 | 1 | 0 | 0 | 0.544916 | FALSE | 0 | RPL5      | 0 | 0 |
| 722 | 1 | 0 | 0 | 0.544916 | FALSE | 0 | RPLP0     | 0 | 0 |
| 722 | 1 | 0 | 0 | 0.544916 | FALSE | 0 | RPN1      | 0 | 0 |
| 722 | 1 | 0 | 0 | 0.544916 | FALSE | 0 | RTN3      | 0 | 0 |
| 722 | 1 | 0 | 0 | 0.544916 | FALSE | 0 | S100A4    | 0 | 0 |
| 722 | 1 | 0 | 0 | 0.544916 | FALSE | 0 | SAV1      | 0 | 0 |
| 722 | 1 | 0 | 0 | 0.544916 | FALSE | 0 | SCP2      | 0 | 0 |
| 722 | 1 | 0 | 0 | 0.544916 | FALSE | 0 | SCUBE1    | 0 | 0 |
| 722 | 1 | 0 | 0 | 0.544916 | FALSE | 0 | SDC4      | 0 | 0 |
| 722 | 1 | 0 | 0 | 0.544916 | FALSE | 0 | SEC22C    | 0 | 0 |
| 722 | 1 | 0 | 0 | 0.544916 | FALSE | 0 | SEMA4G    | 0 | 0 |
| 722 | 1 | 0 | 0 | 0.544916 | FALSE | 0 | SERPINB6  | 0 | 0 |
| 722 | 1 | 0 | 0 | 0.544916 | FALSE | 0 | SF3A3     | 0 | 0 |
| 722 | 1 | 0 | 0 | 0.544916 | FALSE | 0 | SGK3      | 0 | 0 |
| 722 | 1 | 0 | 0 | 0.544916 | FALSE | 0 | SH2B1     | 0 | 0 |
| 722 | 1 | 0 | 0 | 0.544916 | FALSE | 0 | SIAH1     | 0 | 0 |
| 722 | 1 | 0 | 0 | 0.544916 | FALSE | 0 | SIRT1     | 0 | 0 |
| 722 | 1 | 0 | 0 | 0.544916 | FALSE | 0 | SLC25A29  | 0 | 0 |
| 722 | 1 | 0 | 0 | 0.544916 | FALSE | 0 | SLC25A5   | 0 | 0 |
| 722 | 1 | 0 | 0 | 0.544916 | FALSE | 0 | SLC35B4   | 0 | 0 |
| 722 | 1 | 0 | 0 | 0.544916 | FALSE | 0 | SLC44A2   | 0 | 0 |
| 722 | 1 | 0 | 0 | 0.544916 | FALSE | 0 | SLC5A3    | 0 | 0 |

|     |   |   |   |          |       |   |          |   |   |
|-----|---|---|---|----------|-------|---|----------|---|---|
| 722 | 1 | 0 | 0 | 0.544916 | FALSE | 0 | SLC6A9   | 0 | 0 |
| 722 | 1 | 0 | 0 | 0.544916 | FALSE | 0 | SLC8A3   | 0 | 0 |
| 722 | 1 | 0 | 0 | 0.544916 | FALSE | 0 | SLCO3A1  | 0 | 0 |
| 722 | 1 | 0 | 0 | 0.544916 | FALSE | 0 | SLIT2    | 0 | 0 |
| 722 | 1 | 0 | 0 | 0.544916 | FALSE | 0 | SMARCB1  | 0 | 0 |
| 722 | 1 | 0 | 0 | 0.544916 | FALSE | 0 | SMARCE1  | 0 | 0 |
| 722 | 1 | 0 | 0 | 0.544916 | FALSE | 0 | SMG5     | 0 | 0 |
| 722 | 1 | 0 | 0 | 0.544916 | FALSE | 0 | SMUG1    | 0 | 0 |
| 722 | 1 | 0 | 0 | 0.544916 | FALSE | 0 | SNRK     | 0 | 0 |
| 722 | 1 | 0 | 0 | 0.544916 | FALSE | 0 | SOX17    | 0 | 0 |
| 722 | 1 | 0 | 0 | 0.544916 | FALSE | 0 | SPOCK1   | 0 | 0 |
| 722 | 1 | 0 | 0 | 0.544916 | FALSE | 0 | SSBP1    | 0 | 0 |
| 722 | 1 | 0 | 0 | 0.544916 | FALSE | 0 | SSPO     | 0 | 0 |
| 722 | 1 | 0 | 0 | 0.544916 | FALSE | 0 | SSR2     | 0 | 0 |
| 722 | 1 | 0 | 0 | 0.544916 | FALSE | 0 | ST5      | 0 | 0 |
| 722 | 1 | 0 | 0 | 0.544916 | FALSE | 0 | SUCLG2   | 0 | 0 |
| 722 | 1 | 0 | 0 | 0.544916 | FALSE | 0 | SULF2    | 0 | 0 |
| 722 | 1 | 0 | 0 | 0.544916 | FALSE | 0 | SYVN1    | 0 | 0 |
| 722 | 1 | 0 | 0 | 0.544916 | FALSE | 0 | TAF2     | 0 | 0 |
| 722 | 1 | 0 | 0 | 0.544916 | FALSE | 0 | TAF5L    | 0 | 0 |
| 722 | 1 | 0 | 0 | 0.544916 | FALSE | 0 | TAGLN    | 0 | 0 |
| 722 | 1 | 0 | 0 | 0.544916 | FALSE | 0 | TBC1D2B  | 0 | 0 |
| 722 | 1 | 0 | 0 | 0.544916 | FALSE | 0 | TBCEL    | 0 | 0 |
| 722 | 1 | 0 | 0 | 0.544916 | FALSE | 0 | TBKBP1   | 0 | 0 |
| 722 | 1 | 0 | 0 | 0.544916 | FALSE | 0 | TCF7L2   | 0 | 0 |
| 722 | 1 | 0 | 0 | 0.544916 | FALSE | 0 | TCFL5    | 0 | 0 |
| 722 | 1 | 0 | 0 | 0.544916 | FALSE | 0 | TET1     | 0 | 0 |
| 722 | 1 | 0 | 0 | 0.544916 | FALSE | 0 | TIMP2    | 0 | 0 |
| 722 | 1 | 0 | 0 | 0.544916 | FALSE | 0 | TM2D3    | 0 | 0 |
| 722 | 1 | 0 | 0 | 0.544916 | FALSE | 0 | TMBIM1   | 0 | 0 |
| 722 | 1 | 0 | 0 | 0.544916 | FALSE | 0 | TMCC1    | 0 | 0 |
| 722 | 1 | 0 | 0 | 0.544916 | FALSE | 0 | TMEM106C | 0 | 0 |
| 722 | 1 | 0 | 0 | 0.544916 | FALSE | 0 | TMEM140  | 0 | 0 |
| 722 | 1 | 0 | 0 | 0.544916 | FALSE | 0 | TMEM151A | 0 | 0 |
| 722 | 1 | 0 | 0 | 0.544916 | FALSE | 0 | TMEM177  | 0 | 0 |
| 722 | 1 | 0 | 0 | 0.544916 | FALSE | 0 | TMEM206  | 0 | 0 |
| 722 | 1 | 0 | 0 | 0.544916 | FALSE | 0 | TRIM63   | 0 | 0 |
| 722 | 1 | 0 | 0 | 0.544916 | FALSE | 0 | TRPM6    | 0 | 0 |
| 722 | 1 | 0 | 0 | 0.544916 | FALSE | 0 | TRRAP    | 0 | 0 |
| 722 | 1 | 0 | 0 | 0.544916 | FALSE | 0 | TSC22D1  | 0 | 0 |
| 722 | 1 | 0 | 0 | 0.544916 | FALSE | 0 | TSKU     | 0 | 0 |
| 722 | 1 | 0 | 0 | 0.544916 | FALSE | 0 | TTC3     | 0 | 0 |
| 722 | 1 | 0 | 0 | 0.544916 | FALSE | 0 | TXNRD2   | 0 | 0 |
| 722 | 1 | 0 | 0 | 0.544916 | FALSE | 0 | UBE2C    | 0 | 0 |
| 722 | 1 | 0 | 0 | 0.544916 | FALSE | 0 | UBE2D4   | 0 | 0 |
| 722 | 1 | 0 | 0 | 0.544916 | FALSE | 0 | UBE2I    | 0 | 0 |
| 722 | 1 | 0 | 0 | 0.544916 | FALSE | 0 | UFC1     | 0 | 0 |

|     |   |   |   |          |       |   |         |   |   |
|-----|---|---|---|----------|-------|---|---------|---|---|
| 722 | 1 | 0 | 0 | 0.544916 | FALSE | 0 | USP20   | 0 | 0 |
| 722 | 1 | 0 | 0 | 0.544916 | FALSE | 0 | USP21   | 0 | 0 |
| 722 | 1 | 0 | 0 | 0.544916 | FALSE | 0 | USP31   | 0 | 0 |
| 722 | 1 | 0 | 0 | 0.544916 | FALSE | 0 | VPS13D  | 0 | 0 |
| 722 | 1 | 0 | 0 | 0.544916 | FALSE | 0 | WDR41   | 0 | 0 |
| 722 | 1 | 0 | 0 | 0.544916 | FALSE | 0 | XPO5    | 0 | 0 |
| 722 | 1 | 0 | 0 | 0.544916 | FALSE | 0 | XRCC3   | 0 | 0 |
| 722 | 1 | 0 | 0 | 0.544916 | FALSE | 0 | XRCC6   | 0 | 0 |
| 722 | 1 | 0 | 0 | 0.544916 | FALSE | 0 | YBEY    | 0 | 0 |
| 722 | 1 | 0 | 0 | 0.544916 | FALSE | 0 | YIPF3   | 0 | 0 |
| 722 | 1 | 0 | 0 | 0.544916 | FALSE | 0 | YWHAH   | 0 | 0 |
| 722 | 1 | 0 | 0 | 0.544916 | FALSE | 0 | ZBTB41  | 0 | 0 |
| 722 | 1 | 0 | 0 | 0.544916 | FALSE | 0 | ZDHHC9  | 0 | 0 |
| 722 | 1 | 0 | 0 | 0.544916 | FALSE | 0 | ZFHX2   | 0 | 0 |
| 722 | 1 | 0 | 0 | 0.544916 | FALSE | 0 | ZNF212  | 0 | 0 |
| 722 | 1 | 0 | 0 | 0.544916 | FALSE | 0 | ZNF224  | 0 | 0 |
| 722 | 1 | 0 | 0 | 0.544916 | FALSE | 0 | ZNF391  | 0 | 0 |
| 722 | 1 | 0 | 0 | 0.544916 | FALSE | 0 | ZNF442  | 0 | 0 |
| 722 | 1 | 0 | 0 | 0.544916 | FALSE | 0 | ZNF585B | 0 | 0 |
| 722 | 1 | 0 | 0 | 0.544916 | FALSE | 0 | ZNF646  | 0 | 0 |
| 722 | 1 | 0 | 0 | 0.544916 | FALSE | 0 | ZNF706  | 0 | 0 |
| 722 | 1 | 0 | 0 | 0.544916 | FALSE | 0 | ZNF853  | 0 | 0 |



ICoefficient
