# Supplementary material for: [Retracted] Shared Genetic and Epigenetic Mechanisms between the Osteogenic Differentiation of Dental Pulp Stem Cells and Bone Marrow Stem Cells
Source: Hindawi journal article supplement (doi:10.1155/2021/6697810), 2021-01-01
Supplement: f4 [file 6697810.f4.pdf]

| SUID | AverageSh | Betweenne | ClosenessC | ClusteringC | Degree | Eccentricity | IsSingleNo | lab      | name       |
|------|-----------|-----------|------------|-------------|--------|--------------|------------|----------|------------|
| 72   | 2.887701  | 0.000113  | 0.346296   | 0           | 7      | 4            | false      | miRNA_do | hsa-miR-95 |
| 73   | 3.52139   | 0         | 0.283979   | 0           | 1      | 5            | false      | TF       | TLX1       |
| 74   | 3.52139   | 0         | 0.283979   | 0           | 1      | 5            | false      | TF       | KDM3A      |
| 75   | 2.524064  | 0.032877  | 0.396186   | 0           | 70     | 4            | false      | miRNA_do | hsa-miR-8C |
| 76   | 2.925134  | 0.000707  | 0.341865   | 0           | 8      | 5            | false      | miRNA_do | hsa-miR-6E |
| 77   | 3.21123   | 0         | 0.311407   | 0           | 1      | 4            | false      | TF       | KDM6A      |
| 78   | 3.21123   | 0         | 0.311407   | 0           | 1      | 4            | false      | TF       | FXR2       |
| 79   | 3.21123   | 0         | 0.311407   | 0           | 1      | 4            | false      | TF       | NFYC       |
| 80   | 3.21123   | 0         | 0.311407   | 0           | 1      | 4            | false      | TF       | CIITA      |
| 81   | 3.21123   | 0         | 0.311407   | 0           | 1      | 4            | false      | TF       | BPTF       |
| 82   | 3.21123   | 0         | 0.311407   | 0           | 1      | 4            | false      | TF       | ETV5       |
| 83   | 3.21123   | 0         | 0.311407   | 0           | 1      | 4            | false      | TF       | HEXIM1     |
| 84   | 2.213904  | 0.092141  | 0.451691   | 0           | 127    | 3            | false      | miRNA_up | hsa-miR-64 |
| 85   | 2.486631  | 0.01581   | 0.402151   | 0           | 76     | 3            | false      | miRNA_do | hsa-miR-6E |
| 86   | 2.930481  | 0.000769  | 0.341241   | 0           | 10     | 5            | false      | miRNA_up | hsa-miR-61 |
| 87   | 3.203209  | 0         | 0.312187   | 0           | 1      | 5            | false      | miRNA_do | hsa-miR-6C |
| 88   | 3.302139  | 0         | 0.302834   | 0           | 1      | 5            | false      | TF       | MTA3       |
| 89   | 3.302139  | 0         | 0.302834   | 0           | 1      | 5            | false      | TF       | SNAPC4     |
| 90   | 3.302139  | 0         | 0.302834   | 0           | 1      | 5            | false      | TF       | SNAPC1     |
| 91   | 3.302139  | 0         | 0.302834   | 0           | 1      | 5            | false      | TF       | ERCC3      |
| 92   | 3.302139  | 0         | 0.302834   | 0           | 1      | 5            | false      | TF       | ZBTB17     |
| 93   | 3.302139  | 0         | 0.302834   | 0           | 1      | 5            | false      | TF       | INTS13     |
| 94   | 3.302139  | 0         | 0.302834   | 0           | 1      | 5            | false      | TF       | ERCC2      |
| 95   | 2.815508  | 0.000158  | 0.355176   | 0           | 3      | 4            | false      | TF       | SIX2       |
| 96   | 2.304813  | 0.09027   | 0.433875   | 0           | 111    | 4            | false      | miRNA_up | hsa-miR-6C |
| 97   | 3.724599  | 0         | 0.268485   | 0           | 1      | 5            | false      | TF       | HNF1B      |
| 98   | 3.724599  | 0         | 0.268485   | 0           | 1      | 5            | false      | TF       | HNF1A      |
| 99   | 2.727273  | 0.015392  | 0.366667   | 0           | 32     | 4            | false      | miRNA_do | hsa-miR-6C |
| 100  | 3.601604  | 0         | 0.277654   | 0           | 1      | 4            | false      | TF       | LMTK3      |
| 101  | 3.601604  | 0         | 0.277654   | 0           | 1      | 4            | false      | TF       | PHOX2B     |
| 102  | 3.601604  | 0         | 0.277654   | 0           | 1      | 4            | false      | TF       | RBL2       |
| 103  | 3.07754   | 7.62E-05  | 0.324935   | 0           | 2      | 4            | false      | TF       | SP4        |
| 104  | 3.494652  | 3.94E-05  | 0.286151   | 0           | 2      | 4            | false      | TF       | KLF4       |
| 105  | 3.601604  | 0         | 0.277654   | 0           | 1      | 4            | false      | TF       | ZFP42      |
| 106  | 3.601604  | 0         | 0.277654   | 0           | 1      | 4            | false      | TF       | RNF2       |
| 107  | 2.604278  | 0.039007  | 0.383984   | 0           | 54     | 3            | false      | miRNA_up | hsa-miR-5E |
| 108  | 3.360963  | 0         | 0.297534   | 0           | 1      | 5            | false      | TF       | MEF2A      |
| 109  | 3.323529  | 4.49E-05  | 0.300885   | 0           | 2      | 5            | false      | TF       | OTX2       |
| 110  | 2.363636  | 0.035409  | 0.423077   | 0           | 100    | 4            | false      | miRNA_do | hsa-miR-57 |
| 111  | 3.275401  | 4.47E-06  | 0.305306   | 0           | 2      | 4            | false      | TF       | SUMO1      |
| 112  | 2.486631  | 0.017362  | 0.402151   | 0           | 76     | 3            | false      | miRNA_do | hsa-miR-57 |
| 113  | 3.34492   | 0         | 0.298961   | 0           | 1      | 4            | false      | TF       | ORC2       |
| 114  | 3.024064  | 4.56E-05  | 0.330681   | 0           | 2      | 4            | false      | TF       | ZMIZ1      |
| 115  | 3.34492   | 0         | 0.298961   | 0           | 1      | 4            | false      | TF       | MITF       |
| 116  | 2.347594  | 0.054024  | 0.425968   | 0           | 102    | 3            | false      | miRNA_do | hsa-miR-5E |
| 117  | 2.898396  | 4.87E-05  | 0.345018   | 0           | 4      | 4            | false      | miRNA_do | hsa-miR-52 |

|     |          |          |          |   |     |   |       |          |            |
|-----|----------|----------|----------|---|-----|---|-------|----------|------------|
| 118 | 2.561497 | 0.008256 | 0.390397 | 0 | 63  | 4 | false | miRNA_do | hsa-miR-47 |
| 119 | 3.024064 | 3.63E-05 | 0.330681 | 0 | 2   | 4 | false | TF       | HOXA6      |
| 120 | 3.302139 | 0        | 0.302834 | 0 | 1   | 4 | false | TF       | SAP30      |
| 121 | 3.302139 | 0        | 0.302834 | 0 | 1   | 4 | false | TF       | EPAS1      |
| 122 | 3.302139 | 0        | 0.302834 | 0 | 1   | 4 | false | TF       | ELK3       |
| 123 | 3.302139 | 0        | 0.302834 | 0 | 1   | 4 | false | TF       | KLF6       |
| 124 | 2.304813 | 0.064095 | 0.433875 | 0 | 110 | 3 | false | miRNA_up | hsa-miR-47 |
| 125 | 3.131016 | 5.04E-05 | 0.319385 | 0 | 2   | 4 | false | TF       | DUX4       |
| 126 | 3.21123  | 0        | 0.311407 | 0 | 1   | 4 | false | TF       | HMBOX1     |
| 127 | 3.21123  | 0        | 0.311407 | 0 | 1   | 4 | false | TF       | ZBTB16     |
| 128 | 3.045455 | 2.62E-05 | 0.328358 | 0 | 2   | 4 | false | TF       | ZNF83      |
| 129 | 3.21123  | 0        | 0.311407 | 0 | 1   | 4 | false | TF       | GLI2       |
| 130 | 3.21123  | 0        | 0.311407 | 0 | 1   | 4 | false | TF       | DYRK1A     |
| 131 | 3.21123  | 0        | 0.311407 | 0 | 1   | 4 | false | TF       | RB1        |
| 132 | 2.213904 | 0.076107 | 0.451691 | 0 | 127 | 3 | false | miRNA_do | hsa-miR-46 |
| 133 | 3.152406 | 0        | 0.317218 | 0 | 1   | 4 | false | TF       | NCAPG      |
| 134 | 2.986631 | 3.36E-05 | 0.334825 | 0 | 2   | 4 | false | TF       | NFE2L2     |
| 135 | 2.868984 | 7.8E-05  | 0.348555 | 0 | 2   | 4 | false | TF       | CDK6       |
| 136 | 3.152406 | 0        | 0.317218 | 0 | 1   | 4 | false | TF       | C17orf49   |
| 137 | 2.76738  | 0.000135 | 0.361353 | 0 | 3   | 4 | false | TF       | PRAME      |
| 138 | 3.152406 | 0        | 0.317218 | 0 | 1   | 4 | false | TF       | RXRA       |
| 139 | 3.152406 | 0        | 0.317218 | 0 | 1   | 4 | false | TF       | WWTR1      |
| 140 | 3.152406 | 0        | 0.317218 | 0 | 1   | 4 | false | TF       | GREB1      |
| 141 | 3.152406 | 0        | 0.317218 | 0 | 1   | 4 | false | TF       | ARID3A     |
| 142 | 3.152406 | 0        | 0.317218 | 0 | 1   | 4 | false | TF       | BRF1       |
| 143 | 3.152406 | 0        | 0.317218 | 0 | 1   | 4 | false | TF       | BDP1       |
| 144 | 3.152406 | 0        | 0.317218 | 0 | 1   | 4 | false | TF       | SREBF2     |
| 145 | 2.15508  | 0.111565 | 0.46402  | 0 | 138 | 3 | false | miRNA_do | hsa-miR-45 |
| 146 | 2.703209 | 0.000217 | 0.369931 | 0 | 4   | 4 | false | TF       | CEBPD      |
| 147 | 3.045455 | 2.16E-05 | 0.328358 | 0 | 2   | 5 | false | TF       | INTS3      |
| 148 | 2.890374 | 6.52E-05 | 0.345976 | 0 | 3   | 4 | false | TF       | ARNT       |
| 149 | 2.304813 | 0.041483 | 0.433875 | 0 | 111 | 4 | false | miRNA_do | hsa-miR-45 |
| 150 | 2.858289 | 2.91E-05 | 0.34986  | 0 | 2   | 4 | false | TF       | EP400      |
| 151 | 2.831551 | 3.84E-05 | 0.353163 | 0 | 2   | 4 | false | TF       | KDM5C      |
| 152 | 2.681818 | 0.000204 | 0.372881 | 0 | 5   | 4 | false | TF       | SP2        |
| 153 | 2.981283 | 0        | 0.335426 | 0 | 1   | 4 | false | TF       | PRDM14     |
| 154 | 2.981283 | 0        | 0.335426 | 0 | 1   | 4 | false | TF       | THAP11     |
| 155 | 2.890374 | 1.27E-05 | 0.345976 | 0 | 2   | 4 | false | TF       | HMGN3      |
| 156 | 2.494652 | 0.000714 | 0.400857 | 0 | 6   | 4 | false | TF       | ATF2       |
| 157 | 2.762032 | 9.85E-05 | 0.362052 | 0 | 4   | 4 | false | TF       | CCNT2      |
| 158 | 2.804813 | 4.25E-05 | 0.35653  | 0 | 2   | 4 | false | TF       | TBL1Y      |
| 159 | 2.703209 | 0.000127 | 0.369931 | 0 | 3   | 4 | false | TF       | ELK4       |
| 160 | 2.981283 | 0        | 0.335426 | 0 | 1   | 4 | false | TF       | T          |
| 161 | 2.740642 | 0.000197 | 0.364878 | 0 | 3   | 4 | false | TF       | KDM6B      |
| 162 | 2.949198 | 8.71E-06 | 0.339075 | 0 | 2   | 4 | false | TF       | HDAC3      |
| 163 | 2.831551 | 3.84E-05 | 0.353163 | 0 | 2   | 4 | false | TF       | SOX9       |
| 164 | 2.671123 | 0.00017  | 0.374374 | 0 | 3   | 4 | false | TF       | HOXA4      |

|     |          |          |          |   |     |         |          |            |
|-----|----------|----------|----------|---|-----|---------|----------|------------|
| 165 | 2.505348 | 0.000663 | 0.399146 | 0 | 6   | 4 false | TF       | RBPJ       |
| 166 | 2.794118 | 5.86E-05 | 0.357895 | 0 | 2   | 4 false | TF       | MAPK1      |
| 167 | 1.983957 | 0.128566 | 0.504043 | 0 | 170 | 3 false | miRNA_do | hsa-miR-45 |
| 168 | 2.748663 | 0.006397 | 0.363813 | 0 | 31  | 4 false | miRNA_do | hsa-miR-45 |
| 169 | 2.81016  | 7E-05    | 0.355852 | 0 | 3   | 4 false | TF       | SIX5       |
| 170 | 2.703209 | 0.00022  | 0.369931 | 0 | 5   | 4 false | TF       | BCLAF1     |
| 171 | 2.938503 | 6.58E-05 | 0.340309 | 0 | 3   | 5 false | TF       | ICE1       |
| 172 | 3.168449 | 1.55E-05 | 0.315612 | 0 | 2   | 4 false | TF       | GATAD1     |
| 173 | 2.697861 | 0.000201 | 0.370664 | 0 | 5   | 4 false | TF       | ELK1       |
| 174 | 3.473262 | 0        | 0.287914 | 0 | 1   | 5 false | TF       | CDK12      |
| 175 | 3.061497 | 3.87E-05 | 0.326638 | 0 | 3   | 4 false | TF       | THAP1      |
| 176 | 2.475936 | 0.027077 | 0.403888 | 0 | 79  | 4 false | miRNA_do | hsa-miR-45 |
| 177 | 3.205882 | 1.89E-05 | 0.311927 | 0 | 2   | 5 false | TF       | LMO2       |
| 178 | 2.419786 | 0.00147  | 0.41326  | 0 | 10  | 4 false | TF       | POU2F2     |
| 179 | 2.68984  | 0.006134 | 0.371769 | 0 | 42  | 4 false | miRNA_do | hsa-miR-44 |
| 180 | 2.898396 | 0.000486 | 0.345018 | 0 | 4   | 4 false | miRNA_up | hsa-miR-44 |
| 181 | 3.63369  | 4.84E-05 | 0.275202 | 0 | 3   | 5 false | TF       | ASCL1      |
| 182 | 2.791444 | 0.003202 | 0.358238 | 0 | 21  | 4 false | miRNA_do | hsa-miR-44 |
| 183 | 2.775401 | 0.001419 | 0.360308 | 0 | 24  | 4 false | miRNA_up | hsa-miR-44 |
| 184 | 2.780749 | 0.001714 | 0.359615 | 0 | 22  | 4 false | miRNA_up | hsa-miR-42 |
| 185 | 2.756684 | 0.000318 | 0.362755 | 0 | 4   | 4 false | TF       | FOSL1      |
| 186 | 2.796791 | 0.002204 | 0.357553 | 0 | 20  | 4 false | miRNA_up | hsa-miR-42 |
| 187 | 3.762032 | 0        | 0.265814 | 0 | 1   | 5 false | TF       | NCAPG2     |
| 188 | 3.259358 | 3.73E-05 | 0.306809 | 0 | 2   | 4 false | TF       | IRF4       |
| 189 | 3.762032 | 0        | 0.265814 | 0 | 1   | 5 false | TF       | JMJD6      |
| 190 | 3.029412 | 8.86E-05 | 0.330097 | 0 | 3   | 4 false | TF       | ZBTB48     |
| 191 | 2.764706 | 0.012937 | 0.361702 | 0 | 27  | 4 false | miRNA_do | hsa-miR-42 |
| 192 | 3.708556 | 0        | 0.269647 | 0 | 1   | 5 false | TF       | ZNF750     |
| 193 | 2.71123  | 0.010635 | 0.368836 | 0 | 35  | 4 false | miRNA_do | hsa-miR-42 |
| 194 | 2.903743 | 3.7E-05  | 0.344383 | 0 | 4   | 4 false | miRNA_do | hsa-miR-42 |
| 195 | 2.574866 | 0.000351 | 0.38837  | 0 | 6   | 4 false | TF       | NFKB1      |
| 196 | 2.863636 | 0.000107 | 0.349206 | 0 | 3   | 4 false | TF       | ELL2       |
| 197 | 2.68984  | 0.003913 | 0.371769 | 0 | 40  | 4 false | miRNA_up | hsa-miR-37 |
| 198 | 2.676471 | 0.000212 | 0.373626 | 0 | 5   | 4 false | TF       | CDK7       |
| 199 | 2.588235 | 0.010709 | 0.386364 | 0 | 59  | 4 false | miRNA_up | hsa-miR-37 |
| 200 | 3.398396 | 0        | 0.294256 | 0 | 1   | 4 false | TF       | TP73       |
| 201 | 3.23262  | 3.6E-05  | 0.309347 | 0 | 2   | 4 false | TF       | HAND2      |
| 202 | 2.804813 | 0.00049  | 0.35653  | 0 | 7   | 4 false | TF       | TP63       |
| 203 | 2.52139  | 0.000681 | 0.396607 | 0 | 9   | 4 false | TF       | RBBP5      |
| 204 | 2.40107  | 0.031381 | 0.416481 | 0 | 92  | 3 false | miRNA_up | hsa-miR-36 |
| 205 | 3.537433 | 1.44E-05 | 0.282691 | 0 | 2   | 5 false | TF       | XBP1       |
| 206 | 3.622995 | 0        | 0.276015 | 0 | 1   | 5 false | TF       | PITX3      |
| 207 | 3.008021 | 0.0001   | 0.332444 | 0 | 3   | 4 false | TF       | RUNX2      |
| 208 | 2.483957 | 0.000759 | 0.402583 | 0 | 7   | 4 false | TF       | ETV1       |
| 209 | 2.927807 | 0.000137 | 0.341553 | 0 | 3   | 4 false | TF       | APOBEC3B   |
| 210 | 3.312834 | 2.2E-05  | 0.301856 | 0 | 2   | 4 false | TF       | IKZF1      |
| 211 | 3.622995 | 0        | 0.276015 | 0 | 1   | 5 false | TF       | BACH2      |

|     |          |          |          |   |     |   |       |          |            |
|-----|----------|----------|----------|---|-----|---|-------|----------|------------|
| 212 | 3.622995 | 0        | 0.276015 | 0 | 1   | 5 | false | TF       | ASH2L      |
| 213 | 3.622995 | 0        | 0.276015 | 0 | 1   | 5 | false | TF       | JARID2     |
| 214 | 2.625668 | 0.03278  | 0.380855 | 0 | 52  | 4 | false | miRNA_do | hsa-miR-36 |
| 215 | 3.286096 | 0        | 0.304312 | 0 | 1   | 4 | false | TF       | TCF21      |
| 216 | 2.451872 | 0.001045 | 0.407852 | 0 | 9   | 4 | false | TF       | HCFC1      |
| 217 | 3.286096 | 0        | 0.304312 | 0 | 1   | 4 | false | TF       | GFI1B      |
| 218 | 3.040107 | 3.27E-05 | 0.328936 | 0 | 2   | 4 | false | TF       | LDB1       |
| 219 | 3.114973 | 1.61E-05 | 0.32103  | 0 | 2   | 4 | false | TF       | PIAS1      |
| 220 | 2.564171 | 0.000618 | 0.38999  | 0 | 7   | 4 | false | TF       | PBX1       |
| 221 | 2.398396 | 0.000798 | 0.416945 | 0 | 7   | 4 | false | TF       | E2F3       |
| 222 | 3.221925 | 2.3E-05  | 0.310373 | 0 | 2   | 4 | false | TF       | ATF4       |
| 223 | 2.729947 | 0.000199 | 0.366308 | 0 | 4   | 4 | false | TF       | FOXM1      |
| 224 | 2.938503 | 4.83E-05 | 0.340309 | 0 | 2   | 4 | false | TF       | FOKK1      |
| 225 | 2.81016  | 0.000146 | 0.355852 | 0 | 4   | 4 | false | TF       | NFKB2      |
| 226 | 2.596257 | 0.000238 | 0.38517  | 0 | 4   | 4 | false | TF       | MYBL2      |
| 227 | 2.516043 | 0.000554 | 0.39745  | 0 | 8   | 4 | false | TF       | BCL6       |
| 228 | 3.179144 | 2.26E-05 | 0.31455  | 0 | 2   | 4 | false | TF       | BRD1       |
| 229 | 2.312834 | 0.001616 | 0.43237  | 0 | 13  | 4 | false | TF       | KMT2D      |
| 230 | 3.286096 | 0        | 0.304312 | 0 | 1   | 4 | false | TF       | NCOR1      |
| 231 | 3.179144 | 2.26E-05 | 0.31455  | 0 | 2   | 4 | false | TF       | ING5       |
| 232 | 2.339572 | 0.001253 | 0.427429 | 0 | 10  | 4 | false | TF       | FGFR1      |
| 233 | 2.28877  | 0.070914 | 0.436916 | 0 | 113 | 3 | false | miRNA_do | hsa-miR-36 |
| 234 | 2.783422 | 0.000608 | 0.35927  | 0 | 6   | 4 | false | TF       | DNMT3A     |
| 235 | 2.783422 | 0.00044  | 0.35927  | 0 | 6   | 4 | false | TF       | YAP1       |
| 236 | 3.596257 | 0        | 0.278067 | 0 | 1   | 4 | false | TF       | HOXB13     |
| 237 | 2.820856 | 0.000279 | 0.354502 | 0 | 6   | 4 | false | TF       | ELF3       |
| 238 | 2.703209 | 0.000267 | 0.369931 | 0 | 5   | 4 | false | TF       | KDM4A      |
| 239 | 3.574866 | 2.92E-05 | 0.279731 | 0 | 2   | 4 | false | TF       | DMC1       |
| 240 | 2.323529 | 0.001854 | 0.43038  | 0 | 12  | 4 | false | TF       | KMT2A      |
| 241 | 3.596257 | 0        | 0.278067 | 0 | 1   | 4 | false | TF       | DAXX       |
| 242 | 3.596257 | 0        | 0.278067 | 0 | 1   | 4 | false | TF       | FOXP1      |
| 243 | 2.649733 | 0.000409 | 0.377397 | 0 | 7   | 4 | false | TF       | TRIM24     |
| 244 | 2.729947 | 0.000265 | 0.366308 | 0 | 5   | 4 | false | TF       | ZNF263     |
| 245 | 2.59893  | 0.027955 | 0.384774 | 0 | 55  | 3 | false | miRNA_do | hsa-miR-31 |
| 246 | 3.131016 | 0        | 0.319385 | 0 | 1   | 5 | false | TF       | AML1-ETO   |
| 247 | 2.997326 | 3.59E-05 | 0.333631 | 0 | 2   | 5 | false | TF       | CHD1       |
| 248 | 2.681818 | 0.000241 | 0.372881 | 0 | 4   | 4 | false | TF       | JMJD1C     |
| 249 | 2.997326 | 3.59E-05 | 0.333631 | 0 | 2   | 5 | false | TF       | PDX1       |
| 250 | 2.21123  | 0.003266 | 0.452237 | 0 | 17  | 4 | false | TF       | MYB        |
| 251 | 2.505348 | 0.000633 | 0.399146 | 0 | 8   | 4 | false | TF       | EZH2       |
| 252 | 2.719251 | 0.000249 | 0.367748 | 0 | 6   | 4 | false | TF       | ZNF384     |
| 253 | 2.275401 | 0.003196 | 0.439483 | 0 | 14  | 4 | false | TF       | FOS        |
| 254 | 2.569519 | 0.000252 | 0.389178 | 0 | 5   | 4 | false | TF       | GTF2B      |
| 255 | 2.221925 | 0.002211 | 0.45006  | 0 | 11  | 4 | false | TF       | E2F4       |
| 256 | 2.590909 | 0.000206 | 0.385965 | 0 | 4   | 4 | false | TF       | TAF7       |
| 257 | 2.168449 | 0.003017 | 0.461159 | 0 | 16  | 4 | false | TF       | RUNX3      |
| 258 | 2.724599 | 0.000533 | 0.367027 | 0 | 6   | 4 | false | TF       | CEBPA      |

|     |          |          |          |   |    |         |    |         |
|-----|----------|----------|----------|---|----|---------|----|---------|
| 259 | 2.328877 | 0.001635 | 0.429392 | 0 | 12 | 4 false | TF | REST    |
| 260 | 2.794118 | 9.46E-05 | 0.357895 | 0 | 3  | 4 false | TF | MED26   |
| 261 | 2.906417 | 3.37E-05 | 0.344066 | 0 | 2  | 4 false | TF | SMAD4   |
| 262 | 2.195187 | 0.004902 | 0.455542 | 0 | 18 | 4 false | TF | STAT3   |
| 263 | 2.649733 | 0.000189 | 0.377397 | 0 | 4  | 4 false | TF | RUNX1T1 |
| 264 | 2.794118 | 9.36E-05 | 0.357895 | 0 | 3  | 5 false | TF | DCP1A   |
| 265 | 2.836898 | 5.05E-05 | 0.352498 | 0 | 2  | 4 false | TF | ZEB1    |
| 266 | 2.088235 | 0.005238 | 0.478873 | 0 | 21 | 4 false | TF | TCF3    |
| 267 | 3.131016 | 0        | 0.319385 | 0 | 1  | 5 false | TF | PAF1    |
| 268 | 2.393048 | 0.001049 | 0.417877 | 0 | 8  | 4 false | TF | TCF4    |
| 269 | 2.419786 | 0.001072 | 0.41326  | 0 | 8  | 4 false | TF | ATF1    |
| 270 | 2.36631  | 0.00112  | 0.422599 | 0 | 10 | 4 false | TF | CBFB    |
| 271 | 2.740642 | 0.000134 | 0.364878 | 0 | 3  | 4 false | TF | STAT5A  |
| 272 | 2.90107  | 5.71E-05 | 0.3447   | 0 | 3  | 5 false | TF | LYL1    |
| 273 | 2.799465 | 8.45E-05 | 0.357211 | 0 | 3  | 4 false | TF | PRDM11  |
| 274 | 2.489305 | 0.000553 | 0.401719 | 0 | 7  | 4 false | TF | KDM1A   |
| 275 | 2.553476 | 0.000527 | 0.391623 | 0 | 6  | 4 false | TF | PBX3    |
| 276 | 2.558824 | 0.000262 | 0.390805 | 0 | 5  | 4 false | TF | HNF4A   |
| 277 | 2.441176 | 0.000642 | 0.409639 | 0 | 7  | 4 false | TF | NELFA   |
| 278 | 2.708556 | 0.000128 | 0.3692   | 0 | 3  | 4 false | TF | RFX5    |
| 279 | 3.002674 | 0.000116 | 0.333037 | 0 | 3  | 5 false | TF | ESRRA   |
| 280 | 2.815508 | 0.000137 | 0.355176 | 0 | 3  | 5 false | TF | MAF     |
| 281 | 2.483957 | 0.001137 | 0.402583 | 0 | 8  | 4 false | TF | NR2F1   |
| 282 | 2.125668 | 0.00441  | 0.47044  | 0 | 18 | 4 false | TF | EGR1    |
| 283 | 2.852941 | 0.000144 | 0.350515 | 0 | 3  | 4 false | TF | PPARG   |
| 284 | 2.243316 | 0.003169 | 0.445769 | 0 | 13 | 4 false | TF | TFAP4   |
| 285 | 2.676471 | 0.000183 | 0.373626 | 0 | 3  | 4 false | TF | SMARCB1 |
| 286 | 2.697861 | 0.000219 | 0.370664 | 0 | 4  | 4 false | TF | ING2    |
| 287 | 2.47861  | 0.000989 | 0.403452 | 0 | 9  | 4 false | TF | FOSL2   |
| 288 | 2.36631  | 0.001388 | 0.422599 | 0 | 10 | 4 false | TF | RCOR1   |
| 289 | 2.836898 | 5.05E-05 | 0.352498 | 0 | 2  | 4 false | TF | NR1H2   |
| 290 | 2.574866 | 0.000265 | 0.38837  | 0 | 5  | 4 false | TF | USF2    |
| 291 | 2.446524 | 0.000731 | 0.408743 | 0 | 8  | 4 false | TF | GATA2   |
| 292 | 2.462567 | 0.000617 | 0.40608  | 0 | 8  | 4 false | TF | CDK8    |
| 293 | 2.473262 | 0.000839 | 0.404324 | 0 | 8  | 4 false | TF | USF1    |
| 294 | 2.794118 | 9.36E-05 | 0.357895 | 0 | 3  | 5 false | TF | AFF4    |
| 295 | 2.895722 | 5.45E-05 | 0.345337 | 0 | 2  | 5 false | TF | GTF2F1  |
| 296 | 2.676471 | 0.000109 | 0.373626 | 0 | 4  | 4 false | TF | UBTF    |
| 297 | 2.858289 | 4.81E-05 | 0.34986  | 0 | 2  | 4 false | TF | HDAC1   |
| 298 | 2.564171 | 0.000578 | 0.38999  | 0 | 6  | 4 false | TF | BATF    |
| 299 | 2.371658 | 0.001112 | 0.421646 | 0 | 10 | 4 false | TF | PML     |
| 300 | 2.895722 | 5.45E-05 | 0.345337 | 0 | 2  | 5 false | TF | INTS11  |
| 301 | 2.195187 | 0.003279 | 0.455542 | 0 | 19 | 4 false | TF | MED1    |
| 302 | 2.312834 | 0.001876 | 0.43237  | 0 | 13 | 4 false | TF | CREBBP  |
| 303 | 2.414439 | 0.001022 | 0.414175 | 0 | 8  | 4 false | TF | SFPQ    |
| 304 | 2.542781 | 0.000606 | 0.39327  | 0 | 5  | 4 false | TF | TBL1XR1 |
| 305 | 2.184492 | 0.003897 | 0.457772 | 0 | 15 | 4 false | TF | TBP     |

|     |          |          |          |   |     |         |          |            |
|-----|----------|----------|----------|---|-----|---------|----------|------------|
| 306 | 2.826203 | 5.43E-05 | 0.353832 | 0 | 2   | 4 false | TF       | SREBF1     |
| 307 | 2.419786 | 0.00131  | 0.41326  | 0 | 9   | 4 false | TF       | ATF3       |
| 308 | 2.23262  | 0.00266  | 0.447904 | 0 | 16  | 4 false | TF       | SUPT5H     |
| 309 | 2.446524 | 0.000653 | 0.408743 | 0 | 9   | 4 false | TF       | LEO1       |
| 310 | 2.590909 | 0.000206 | 0.385965 | 0 | 4   | 4 false | TF       | NFATC1     |
| 311 | 2.296791 | 0.001542 | 0.43539  | 0 | 11  | 4 false | TF       | NELFE      |
| 312 | 2.18984  | 0.005712 | 0.456654 | 0 | 19  | 4 false | TF       | JUND       |
| 313 | 2.398396 | 0.001482 | 0.416945 | 0 | 9   | 4 false | TF       | GRHL2      |
| 314 | 2.318182 | 0.001428 | 0.431373 | 0 | 12  | 4 false | TF       | BCOR       |
| 315 | 2.13369  | 0.110606 | 0.468672 | 0 | 143 | 4 false | miRNA_up | hsa-miR-31 |
| 316 | 2.088235 | 0.004576 | 0.478873 | 0 | 19  | 4 false | TF       | NOTCH1     |
| 317 | 2.858289 | 0.000124 | 0.34986  | 0 | 4   | 4 false | TF       | VDR        |
| 318 | 2.644385 | 0.000387 | 0.37816  | 0 | 6   | 4 false | TF       | SMAD3      |
| 319 | 2.147059 | 0.003495 | 0.465753 | 0 | 19  | 4 false | TF       | KDM2B      |
| 320 | 2.09893  | 0.004831 | 0.476433 | 0 | 18  | 4 false | TF       | CREB1      |
| 321 | 2.649733 | 0.00028  | 0.377397 | 0 | 6   | 4 false | TF       | KDM4C      |
| 322 | 2.435829 | 0.000716 | 0.410538 | 0 | 9   | 4 false | TF       | RARA       |
| 323 | 2.104278 | 0.004425 | 0.475222 | 0 | 19  | 4 false | TF       | LARP7      |
| 324 | 2.516043 | 0.000472 | 0.39745  | 0 | 8   | 4 false | TF       | TRIM25     |
| 325 | 2.205882 | 0.002891 | 0.453333 | 0 | 15  | 4 false | TF       | RELA       |
| 326 | 2.136364 | 0.004093 | 0.468085 | 0 | 21  | 4 false | TF       | PHF8       |
| 327 | 2.574866 | 0.00023  | 0.38837  | 0 | 4   | 4 false | TF       | BCL3       |
| 328 | 2.606952 | 0.000475 | 0.38359  | 0 | 10  | 4 false | TF       | FOXO1      |
| 329 | 2.066845 | 0.00628  | 0.483829 | 0 | 22  | 4 false | TF       | ZNF143     |
| 330 | 2.494652 | 0.000596 | 0.400857 | 0 | 8   | 4 false | TF       | SETD1A     |
| 331 | 2.040107 | 0.006168 | 0.49017  | 0 | 20  | 4 false | TF       | E2F1       |
| 332 | 2.23262  | 0.002183 | 0.447904 | 0 | 13  | 4 false | TF       | NRF1       |
| 333 | 2.596257 | 0.000405 | 0.38517  | 0 | 6   | 4 false | TF       | BRPF3      |
| 334 | 2.227273 | 0.003173 | 0.44898  | 0 | 17  | 4 false | TF       | SMC1A      |
| 335 | 2.050802 | 0.006421 | 0.487614 | 0 | 22  | 4 false | TF       | MAZ        |
| 336 | 2.243316 | 0.002654 | 0.445769 | 0 | 16  | 4 false | TF       | YY1        |
| 337 | 2.259358 | 0.001865 | 0.442604 | 0 | 15  | 4 false | TF       | CXXC1      |
| 338 | 2.483957 | 0.000924 | 0.402583 | 0 | 8   | 4 false | TF       | ZMYND8     |
| 339 | 2.671123 | 0.000136 | 0.374374 | 0 | 4   | 4 false | TF       | MYOD1      |
| 340 | 2.339572 | 0.001861 | 0.427429 | 0 | 14  | 4 false | TF       | EBF1       |
| 341 | 2.628342 | 0.000632 | 0.380468 | 0 | 8   | 4 false | TF       | NFIC       |
| 342 | 2.18984  | 0.003154 | 0.456654 | 0 | 17  | 4 false | TF       | GATA1      |
| 343 | 2.184492 | 0.003282 | 0.457772 | 0 | 17  | 4 false | TF       | ZBTB7A     |
| 344 | 2.221925 | 0.002375 | 0.45006  | 0 | 15  | 4 false | TF       | FLI1       |
| 345 | 2.173797 | 0.003104 | 0.460025 | 0 | 15  | 4 false | TF       | NFE2       |
| 346 | 2.227273 | 0.003081 | 0.44898  | 0 | 17  | 4 false | TF       | TAL1       |
| 347 | 2.21123  | 0.002329 | 0.452237 | 0 | 16  | 4 false | TF       | CHD8       |
| 348 | 2.419786 | 0.000811 | 0.41326  | 0 | 10  | 4 false | TF       | TAF3       |
| 349 | 2.387701 | 0.00094  | 0.418813 | 0 | 8   | 4 false | TF       | NFYB       |
| 350 | 2.318182 | 0.001229 | 0.431373 | 0 | 11  | 4 false | TF       | CBX3       |
| 351 | 2.286096 | 0.001672 | 0.437427 | 0 | 11  | 4 false | TF       | KLF11      |
| 352 | 2.034759 | 0.009876 | 0.491459 | 0 | 25  | 4 false | TF       | CTCF       |

|     |          |          |          |   |    |         |          |            |
|-----|----------|----------|----------|---|----|---------|----------|------------|
| 353 | 2.147059 | 0.003415 | 0.465753 | 0 | 16 | 4 false | TF       | KLF1       |
| 354 | 2.179144 | 0.003253 | 0.458896 | 0 | 18 | 4 false | TF       | MYCN       |
| 355 | 3.013369 | 5.8E-05  | 0.331854 | 0 | 3  | 4 false | TF       | KAT7       |
| 356 | 2.254011 | 0.002661 | 0.443654 | 0 | 15 | 4 false | TF       | SRF        |
| 357 | 3.136364 | 1.32E-05 | 0.318841 | 0 | 2  | 4 false | TF       | BACH1      |
| 358 | 2.286096 | 0.001819 | 0.437427 | 0 | 11 | 4 false | TF       | ASXL1      |
| 359 | 2.377005 | 0.000834 | 0.420697 | 0 | 8  | 4 false | TF       | NFYA       |
| 360 | 2.141711 | 0.004164 | 0.466916 | 0 | 20 | 4 false | TF       | TAF1       |
| 361 | 2.248663 | 0.002685 | 0.444709 | 0 | 16 | 4 false | TF       | RAD21      |
| 362 | 2.323529 | 0.00234  | 0.43038  | 0 | 13 | 4 false | TF       | TP53       |
| 363 | 2.596257 | 0.000333 | 0.38517  | 0 | 7  | 4 false | TF       | MYH11      |
| 364 | 2.184492 | 0.003882 | 0.457772 | 0 | 18 | 4 false | TF       | HEY1       |
| 365 | 2.227273 | 0.002248 | 0.44898  | 0 | 14 | 4 false | TF       | MBD3       |
| 366 | 2.382353 | 0.001345 | 0.419753 | 0 | 10 | 4 false | TF       | SMAD1      |
| 367 | 2.248663 | 0.002344 | 0.444709 | 0 | 13 | 4 false | TF       | IRF1       |
| 368 | 2.451872 | 0.000883 | 0.407852 | 0 | 8  | 4 false | TF       | BRD3       |
| 369 | 2.307487 | 0.001419 | 0.433372 | 0 | 12 | 4 false | TF       | WDR5       |
| 370 | 2.125668 | 0.004486 | 0.47044  | 0 | 19 | 4 false | TF       | STAT1      |
| 371 | 2.532086 | 0.000689 | 0.394931 | 0 | 8  | 4 false | TF       | SMC3       |
| 372 | 2.537433 | 0.000607 | 0.394099 | 0 | 6  | 4 false | TF       | NR1H3      |
| 373 | 2.296791 | 0.001966 | 0.43539  | 0 | 12 | 4 false | TF       | JUN        |
| 374 | 2.072193 | 0.00707  | 0.482581 | 0 | 23 | 4 false | TF       | SPI1       |
| 375 | 2.997326 | 3.71E-05 | 0.333631 | 0 | 3  | 4 false | TF       | FOXP2      |
| 376 | 2.350267 | 0.001808 | 0.425484 | 0 | 13 | 4 false | TF       | STAG1      |
| 377 | 2.390374 | 0.033753 | 0.418345 | 0 | 95 | 4 false | miRNA_do | hsa-miR-31 |
| 378 | 2.350267 | 0.001541 | 0.425484 | 0 | 10 | 4 false | TF       | CHD2       |
| 379 | 3.259358 | 7.03E-05 | 0.306809 | 0 | 2  | 4 false | TF       | DDX5       |
| 380 | 2.425134 | 0.001462 | 0.412348 | 0 | 9  | 4 false | TF       | BRCA1      |
| 381 | 2.457219 | 0.000968 | 0.406964 | 0 | 6  | 4 false | TF       | ZBTB33     |
| 382 | 2.877005 | 0.000577 | 0.347584 | 0 | 8  | 4 false | miRNA_do | hsa-miR-14 |
| 383 | 2.564171 | 0.000423 | 0.38999  | 0 | 6  | 4 false | TF       | SOX2       |
| 384 | 2.147059 | 0.003234 | 0.465753 | 0 | 14 | 4 false | TF       | SIN3A      |
| 385 | 2.323529 | 0.001889 | 0.43038  | 0 | 11 | 4 false | TF       | KLF5       |
| 386 | 2.168449 | 0.002909 | 0.461159 | 0 | 16 | 4 false | TF       | GABPA      |
| 387 | 2.419786 | 0.001272 | 0.41326  | 0 | 11 | 4 false | TF       | FOXA2      |
| 388 | 3.045455 | 0.000137 | 0.328358 | 0 | 3  | 4 false | TF       | MAFF       |
| 389 | 2.088235 | 0.00484  | 0.478873 | 0 | 19 | 4 false | TF       | E2F6       |
| 390 | 3.302139 | 3.86E-05 | 0.302834 | 0 | 3  | 4 false | TF       | TLE3       |
| 391 | 2.125668 | 0.004727 | 0.47044  | 0 | 18 | 4 false | TF       | NR3C1      |
| 392 | 2.751337 | 0.000116 | 0.36346  | 0 | 3  | 4 false | TF       | KDM5D      |
| 393 | 2.697861 | 0.000852 | 0.370664 | 0 | 8  | 4 false | TF       | TET2       |
| 394 | 2.163102 | 0.004673 | 0.462299 | 0 | 19 | 4 false | TF       | GATA3      |
| 395 | 1.954545 | 0.015768 | 0.511628 | 0 | 30 | 4 false | TF       | FOXA1      |
| 396 | 3.221925 | 1.34E-05 | 0.310373 | 0 | 2  | 4 false | TF       | POU5F1     |
| 397 | 2.526738 | 0.000508 | 0.395767 | 0 | 6  | 4 false | TF       | HDAC2      |
| 398 | 2.804813 | 0.000105 | 0.35653  | 0 | 3  | 4 false | TF       | SMAD2      |
| 399 | 2.05615  | 0.005904 | 0.486346 | 0 | 22 | 4 false | TF       | ELF1       |

|     |          |          |          |   |    |         |          |            |
|-----|----------|----------|----------|---|----|---------|----------|------------|
| 400 | 2.034759 | 0.006933 | 0.491459 | 0 | 24 | 4 false | TF       | RUNX1      |
| 401 | 2.227273 | 0.002927 | 0.44898  | 0 | 13 | 4 false | TF       | TCF7L2     |
| 402 | 2.147059 | 0.004839 | 0.465753 | 0 | 19 | 4 false | TF       | TRIM28     |
| 403 | 2.606952 | 0.00032  | 0.38359  | 0 | 4  | 4 false | TF       | SMARCA4    |
| 404 | 2.949198 | 6.6E-05  | 0.339075 | 0 | 3  | 4 false | TF       | NIPBL      |
| 405 | 2.008021 | 0.008387 | 0.498003 | 0 | 26 | 4 false | TF       | ERG        |
| 406 | 2.205882 | 0.009432 | 0.453333 | 0 | 17 | 4 false | TF       | SUMO2      |
| 407 | 2.590909 | 0.000638 | 0.385965 | 0 | 7  | 4 false | TF       | GATA4      |
| 408 | 2.109626 | 0.005538 | 0.474018 | 0 | 22 | 4 false | TF       | ARNTL      |
| 409 | 2.024064 | 0.01016  | 0.494055 | 0 | 27 | 4 false | TF       | ESR1       |
| 410 | 2.259358 | 0.002226 | 0.442604 | 0 | 12 | 4 false | TF       | TEAD4      |
| 411 | 1.986631 | 0.01079  | 0.503365 | 0 | 27 | 4 false | TF       | HIF1A      |
| 412 | 2.286096 | 0.002157 | 0.437427 | 0 | 11 | 4 false | TF       | NR2F2      |
| 413 | 2.008021 | 0.009367 | 0.498003 | 0 | 29 | 4 false | TF       | BRD4       |
| 414 | 2.622995 | 0.000358 | 0.381244 | 0 | 6  | 4 false | TF       | EOMES      |
| 415 | 3.307487 | 2.59E-05 | 0.302344 | 0 | 2  | 4 false | TF       | GATA6      |
| 416 | 2.697861 | 0.000552 | 0.370664 | 0 | 6  | 4 false | TF       | KMT2C      |
| 417 | 2.681818 | 0.000313 | 0.372881 | 0 | 6  | 4 false | TF       | PAX5       |
| 418 | 3.553476 | 0        | 0.281415 | 0 | 1  | 4 false | TF       | STAT5B     |
| 419 | 2.029412 | 0.012695 | 0.492754 | 0 | 29 | 4 false | TF       | AR         |
| 420 | 2.441176 | 0.000723 | 0.409639 | 0 | 7  | 4 false | TF       | BHLHE40    |
| 421 | 2.78877  | 9.19E-05 | 0.358581 | 0 | 3  | 4 false | TF       | FOXH1      |
| 422 | 1.986631 | 0.008951 | 0.503365 | 0 | 26 | 4 false | TF       | KDM5B      |
| 423 | 2.152406 | 0.004902 | 0.464596 | 0 | 18 | 4 false | TF       | TFAP2A     |
| 424 | 2.254011 | 0.002898 | 0.443654 | 0 | 17 | 4 false | TF       | MXI1       |
| 425 | 2.125668 | 0.006218 | 0.47044  | 0 | 21 | 4 false | TF       | CEBPB      |
| 426 | 1.981283 | 0.010644 | 0.504723 | 0 | 28 | 4 false | TF       | EP300      |
| 427 | 2.836898 | 0.000264 | 0.352498 | 0 | 5  | 4 false | TF       | AHR        |
| 428 | 2.013369 | 0.008083 | 0.49668  | 0 | 25 | 4 false | TF       | MYC        |
| 429 | 2.061497 | 0.007389 | 0.485084 | 0 | 22 | 4 false | TF       | SP1        |
| 430 | 2.697861 | 0.000603 | 0.370664 | 0 | 6  | 4 false | TF       | GTF2I      |
| 431 | 2.114973 | 0.005147 | 0.472819 | 0 | 21 | 4 false | TF       | TCF12      |
| 432 | 2.259358 | 0.002655 | 0.442604 | 0 | 16 | 4 false | TF       | CNOT3      |
| 433 | 2.136364 | 0.006262 | 0.468085 | 0 | 21 | 4 false | TF       | TFAP2C     |
| 434 | 2.676471 | 0.000417 | 0.373626 | 0 | 6  | 4 false | TF       | LMNA       |
| 435 | 2.179144 | 0.002982 | 0.458896 | 0 | 16 | 4 false | TF       | ETS1       |
| 436 | 1.997326 | 0.009458 | 0.500669 | 0 | 29 | 4 false | TF       | MAX        |
| 437 | 2.510695 | 0.001012 | 0.398296 | 0 | 9  | 4 false | TF       | SNAI2      |
| 438 | 2.462567 | 0.000932 | 0.40608  | 0 | 7  | 4 false | TF       | HNF4G      |
| 439 | 3.221925 | 1.34E-05 | 0.310373 | 0 | 2  | 4 false | TF       | CTNNB1     |
| 440 | 2.687166 | 0.000343 | 0.372139 | 0 | 6  | 4 false | TF       | NKX2-1     |
| 441 | 2.371658 | 0.001705 | 0.421646 | 0 | 12 | 4 false | TF       | PGR        |
| 442 | 2.131016 | 0.004453 | 0.46926  | 0 | 20 | 4 false | TF       | CTCF       |
| 443 | 2.569519 | 0.000507 | 0.389178 | 0 | 8  | 4 false | TF       | CDK9       |
| 444 | 2.858289 | 0.000363 | 0.34986  | 0 | 6  | 4 false | TF       | MAFK       |
| 445 | 2.804813 | 0.000278 | 0.35653  | 0 | 4  | 4 false | TF       | NANOG      |
| 446 | 2.55615  | 0.029296 | 0.391213 | 0 | 63 | 3 false | miRNA_up | hsa-miR-12 |



| Neighborh | NumberOfI | NumberOfI | PartnerOfI | Radiality | selected | SelfLoops | shared nan | Stress  | Topologica |
|-----------|-----------|-----------|------------|-----------|----------|-----------|------------|---------|------------|
| 18.57143  | 7         | 0         | 0          | 0.62246   | false    | 0         | hsa-miR-95 | 4458    | 0.516807   |
| 70        | 1         | 0         | 0          | 0.495722  | false    | 0         | TLX1       | 0       | 0          |
| 70        | 1         | 0         | 0          | 0.495722  | false    | 0         | KDM3A      | 0       | 0          |
| 15.18571  | 70        | 0         | 0          | 0.695187  | false    | 0         | hsa-miR-8C | 989740  | 0.363736   |
| 13        | 8         | 0         | 0          | 0.614973  | false    | 0         | hsa-miR-6C | 18204   | 0.4        |
| 127       | 1         | 0         | 0          | 0.557754  | false    | 0         | KDM6A      | 0       | 0          |
| 127       | 1         | 0         | 0          | 0.557754  | false    | 0         | FXR2       | 0       | 0          |
| 127       | 1         | 0         | 0          | 0.557754  | false    | 0         | NFYC       | 0       | 0          |
| 127       | 1         | 0         | 0          | 0.557754  | false    | 0         | CIITA      | 0       | 0          |
| 127       | 1         | 0         | 0          | 0.557754  | false    | 0         | BPTF       | 0       | 0          |
| 127       | 1         | 0         | 0          | 0.557754  | false    | 0         | ETV5       | 0       | 0          |
| 127       | 1         | 0         | 0          | 0.557754  | false    | 0         | HEXIM1     | 0       | 0          |
| 13.14173  | 127       | 0         | 0          | 0.757219  | false    | 0         | hsa-miR-64 | 2356360 | 0.303543   |
| 15.22368  | 76        | 0         | 0          | 0.702674  | false    | 0         | hsa-miR-63 | 551556  | 0.355592   |
| 10.9      | 10        | 0         | 0          | 0.613904  | false    | 0         | hsa-miR-61 | 18602   | 0.341379   |
| 17        | 1         | 0         | 0          | 0.559358  | false    | 0         | hsa-miR-6C | 0       | 0          |
| 111       | 1         | 0         | 0          | 0.539572  | false    | 0         | MTA3       | 0       | 0          |
| 111       | 1         | 0         | 0          | 0.539572  | false    | 0         | SNAPC4     | 0       | 0          |
| 111       | 1         | 0         | 0          | 0.539572  | false    | 0         | SNAPC1     | 0       | 0          |
| 111       | 1         | 0         | 0          | 0.539572  | false    | 0         | ERCC3      | 0       | 0          |
| 111       | 1         | 0         | 0          | 0.539572  | false    | 0         | ZBTB17     | 0       | 0          |
| 111       | 1         | 0         | 0          | 0.539572  | false    | 0         | INTS13     | 0       | 0          |
| 111       | 1         | 0         | 0          | 0.539572  | false    | 0         | ERCC2      | 0       | 0          |
| 102.6667  | 3         | 0         | 0          | 0.636898  | false    | 0         | SIX2       | 6612    | 0.513468   |
| 11.73874  | 111       | 0         | 0          | 0.739037  | false    | 0         | hsa-miR-6C | 2320702 | 0.275352   |
| 32        | 1         | 0         | 0          | 0.45508   | false    | 0         | HNF1B      | 0       | 0          |
| 32        | 1         | 0         | 0          | 0.45508   | false    | 0         | HNF1A      | 0       | 0          |
| 14.5625   | 32        | 0         | 0          | 0.654545  | false    | 0         | hsa-miR-6C | 278708  | 0.347756   |
| 54        | 1         | 0         | 0          | 0.479679  | false    | 0         | LMTK3      | 0       | 0          |
| 54        | 1         | 0         | 0          | 0.479679  | false    | 0         | PHOX2B     | 0       | 0          |
| 54        | 1         | 0         | 0          | 0.479679  | false    | 0         | RBL2       | 0       | 0          |
| 90.5      | 2         | 0         | 0          | 0.584492  | false    | 0         | SP4        | 2006    | 0.596667   |
| 43        | 2         | 0         | 0          | 0.50107   | false    | 0         | KLF4       | 540     | 0.583333   |
| 54        | 1         | 0         | 0          | 0.479679  | false    | 0         | ZFP42      | 0       | 0          |
| 54        | 1         | 0         | 0          | 0.479679  | false    | 0         | RNF2       | 0       | 0          |
| 13.59259  | 54        | 0         | 0          | 0.679144  | false    | 0         | hsa-miR-58 | 845112  | 0.314815   |
| 100       | 1         | 0         | 0          | 0.527807  | false    | 0         | MEF2A      | 0       | 0          |
| 55        | 2         | 0         | 0          | 0.535294  | false    | 0         | OTX2       | 872     | 0.514286   |
| 15.13     | 100       | 0         | 0          | 0.727273  | false    | 0         | hsa-miR-57 | 1156898 | 0.362308   |
| 88        | 2         | 0         | 0          | 0.54492   | false    | 0         | SUMO1      | 286     | 0.769912   |
| 16.28947  | 76        | 0         | 0          | 0.702674  | false    | 0         | hsa-miR-57 | 644170  | 0.382237   |
| 102       | 1         | 0         | 0          | 0.531016  | false    | 0         | ORC2       | 0       | 0          |
| 106.5     | 2         | 0         | 0          | 0.595187  | false    | 0         | ZMIZ1      | 2208    | 0.659375   |
| 102       | 1         | 0         | 0          | 0.531016  | false    | 0         | MITF       | 0       | 0          |
| 14.06863  | 102       | 0         | 0          | 0.730481  | false    | 0         | hsa-miR-5C | 1581068 | 0.326716   |
| 21        | 4         | 0         | 0          | 0.620321  | false    | 0         | hsa-miR-52 | 1576    | 0.571429   |

|          |     |   |   |          |       |   |            |         |          |
|----------|-----|---|---|----------|-------|---|------------|---------|----------|
| 17.96825 | 63  | 0 | 0 | 0.687701 | false | 0 | hsa-miR-47 | 324858  | 0.435083 |
| 118.5    | 2   | 0 | 0 | 0.595187 | false | 0 | HOXA6      | 1710    | 0.734375 |
| 110      | 1   | 0 | 0 | 0.539572 | false | 0 | SAP30      | 0       | 0        |
| 110      | 1   | 0 | 0 | 0.539572 | false | 0 | EPAS1      | 0       | 0        |
| 110      | 1   | 0 | 0 | 0.539572 | false | 0 | ELK3       | 0       | 0        |
| 110      | 1   | 0 | 0 | 0.539572 | false | 0 | KLF6       | 0       | 0        |
| 13.78182 | 110 | 0 | 0 | 0.739037 | false | 0 | hsa-miR-47 | 1809326 | 0.319545 |
| 90.5     | 2   | 0 | 0 | 0.573797 | false | 0 | DUX4       | 1526    | 0.639286 |
| 127      | 1   | 0 | 0 | 0.557754 | false | 0 | HMBOX1     | 0       | 0        |
| 127      | 1   | 0 | 0 | 0.557754 | false | 0 | ZBTB16     | 0       | 0        |
| 118.5    | 2   | 0 | 0 | 0.590909 | false | 0 | ZNF83      | 1354    | 0.753205 |
| 127      | 1   | 0 | 0 | 0.557754 | false | 0 | GLI2       | 0       | 0        |
| 127      | 1   | 0 | 0 | 0.557754 | false | 0 | DYRK1A     | 0       | 0        |
| 127      | 1   | 0 | 0 | 0.557754 | false | 0 | RB1        | 0       | 0        |
| 13.94488 | 127 | 0 | 0 | 0.757219 | false | 0 | hsa-miR-46 | 2080056 | 0.323622 |
| 138      | 1   | 0 | 0 | 0.569519 | false | 0 | NCAPG      | 0       | 0        |
| 120      | 2   | 0 | 0 | 0.602674 | false | 0 | NFE2L2     | 1680    | 0.712575 |
| 124.5    | 2   | 0 | 0 | 0.626203 | false | 0 | CDK6       | 3496    | 0.653439 |
| 138      | 1   | 0 | 0 | 0.569519 | false | 0 | C17orf49   | 0       | 0        |
| 130.6667 | 3   | 0 | 0 | 0.646524 | false | 0 | PRAME      | 6622    | 0.626409 |
| 138      | 1   | 0 | 0 | 0.569519 | false | 0 | RXRA       | 0       | 0        |
| 138      | 1   | 0 | 0 | 0.569519 | false | 0 | WWTR1      | 0       | 0        |
| 138      | 1   | 0 | 0 | 0.569519 | false | 0 | GREB1      | 0       | 0        |
| 138      | 1   | 0 | 0 | 0.569519 | false | 0 | ARID3A     | 0       | 0        |
| 138      | 1   | 0 | 0 | 0.569519 | false | 0 | BRF1       | 0       | 0        |
| 138      | 1   | 0 | 0 | 0.569519 | false | 0 | BDP1       | 0       | 0        |
| 138      | 1   | 0 | 0 | 0.569519 | false | 0 | SREBF2     | 0       | 0        |
| 12.63043 | 138 | 0 | 0 | 0.768984 | false | 0 | hsa-miR-45 | 2749952 | 0.290761 |
| 115.5    | 4   | 0 | 0 | 0.659358 | false | 0 | CEBPD      | 11410   | 0.525229 |
| 111      | 2   | 0 | 0 | 0.590909 | false | 0 | INTS3      | 1438    | 0.700637 |
| 107.6667 | 3   | 0 | 0 | 0.621925 | false | 0 | ARNT       | 4052    | 0.57971  |
| 14.09009 | 111 | 0 | 0 | 0.739037 | false | 0 | hsa-miR-45 | 1344718 | 0.335643 |
| 136      | 2   | 0 | 0 | 0.628342 | false | 0 | EP400      | 1910    | 0.706806 |
| 148.5    | 2   | 0 | 0 | 0.63369  | false | 0 | KDM5C      | 2288    | 0.752551 |
| 116.6    | 5   | 0 | 0 | 0.663636 | false | 0 | SP2        | 11300   | 0.523077 |
| 170      | 1   | 0 | 0 | 0.603743 | false | 0 | PRDM14     | 0       | 0        |
| 170      | 1   | 0 | 0 | 0.603743 | false | 0 | THAP11     | 0       | 0        |
| 140.5    | 2   | 0 | 0 | 0.621925 | false | 0 | HMG3       | 1066    | 0.754054 |
| 118.5    | 6   | 0 | 0 | 0.70107  | false | 0 | ATF2       | 30474   | 0.460784 |
| 120.75   | 4   | 0 | 0 | 0.647594 | false | 0 | CCNT2      | 6678    | 0.578502 |
| 154      | 2   | 0 | 0 | 0.639037 | false | 0 | TBL1Y      | 2584    | 0.761194 |
| 139.3333 | 3   | 0 | 0 | 0.659358 | false | 0 | ELK4       | 7026    | 0.631659 |
| 170      | 1   | 0 | 0 | 0.603743 | false | 0 | T          | 0       | 0        |
| 120.6667 | 3   | 0 | 0 | 0.651872 | false | 0 | KDM6B      | 6954    | 0.564465 |
| 116.5    | 2   | 0 | 0 | 0.61016  | false | 0 | HDAC3      | 486     | 0.663793 |
| 148.5    | 2   | 0 | 0 | 0.63369  | false | 0 | SOX9       | 2288    | 0.752551 |
| 136      | 3   | 0 | 0 | 0.665775 | false | 0 | HOXA4      | 8930    | 0.6      |

|          |     |   |   |          |       |   |            |         |          |
|----------|-----|---|---|----------|-------|---|------------|---------|----------|
| 116.8333 | 6   | 0 | 0 | 0.69893  | false | 0 | RBPJ       | 28250   | 0.457839 |
| 140.5    | 2   | 0 | 0 | 0.641176 | false | 0 | MAPK1      | 3356    | 0.687192 |
| 12.15882 | 170 | 0 | 0 | 0.803209 | false | 0 | hsa-miR-45 | 3078426 | 0.278971 |
| 14.29032 | 31  | 0 | 0 | 0.650267 | false | 0 | hsa-miR-45 | 187622  | 0.369176 |
| 119.6667 | 3   | 0 | 0 | 0.637968 | false | 0 | SIX5       | 3984    | 0.596315 |
| 107.2    | 5   | 0 | 0 | 0.659358 | false | 0 | BCLAF1     | 12304   | 0.489401 |
| 100.3333 | 3   | 0 | 0 | 0.612299 | false | 0 | ICE1       | 3768    | 0.564394 |
| 94.5     | 2   | 0 | 0 | 0.56631  | false | 0 | GATAD1     | 810     | 0.703008 |
| 117.2    | 5   | 0 | 0 | 0.660428 | false | 0 | ELK1       | 11382   | 0.533028 |
| 79       | 1   | 0 | 0 | 0.505348 | false | 0 | CDK12      | 0       | 0        |
| 96.33333 | 3   | 0 | 0 | 0.587701 | false | 0 | THAP1      | 2096    | 0.627193 |
| 14.35443 | 79  | 0 | 0 | 0.704813 | false | 0 | hsa-miR-45 | 866184  | 0.342421 |
| 76.5     | 2   | 0 | 0 | 0.558824 | false | 0 | LMO2       | 704     | 0.594488 |
| 96.1     | 10  | 0 | 0 | 0.716043 | false | 0 | POU2F2     | 55708   | 0.358868 |
| 14.69048 | 42  | 0 | 0 | 0.662032 | false | 0 | hsa-miR-44 | 217244  | 0.380291 |
| 21.25    | 4   | 0 | 0 | 0.620321 | false | 0 | hsa-miR-44 | 9904    | 0.578571 |
| 18.66667 | 3   | 0 | 0 | 0.473262 | false | 0 | ASCL1      | 284     | 0.384058 |
| 16.61905 | 21  | 0 | 0 | 0.641711 | false | 0 | hsa-miR-44 | 85302   | 0.411028 |
| 16.70833 | 24  | 0 | 0 | 0.64492  | false | 0 | hsa-miR-44 | 49254   | 0.413377 |
| 18.68182 | 22  | 0 | 0 | 0.64385  | false | 0 | hsa-miR-42 | 63534   | 0.45338  |
| 84.5     | 4   | 0 | 0 | 0.648663 | false | 0 | FOSL1      | 6926    | 0.401442 |
| 13.4     | 20  | 0 | 0 | 0.640642 | false | 0 | hsa-miR-42 | 65918   | 0.326316 |
| 27       | 1   | 0 | 0 | 0.447594 | false | 0 | NCAPG2     | 0       | 0        |
| 68.5     | 2   | 0 | 0 | 0.548128 | false | 0 | IRF4       | 664     | 0.581897 |
| 27       | 1   | 0 | 0 | 0.447594 | false | 0 | JMJD6      | 0       | 0        |
| 82.66667 | 3   | 0 | 0 | 0.594118 | false | 0 | ZBTB48     | 2608    | 0.516878 |
| 16.88889 | 27  | 0 | 0 | 0.647059 | false | 0 | hsa-miR-42 | 219934  | 0.429429 |
| 35       | 1   | 0 | 0 | 0.458289 | false | 0 | ZNF750     | 0       | 0        |
| 17.11429 | 35  | 0 | 0 | 0.657754 | false | 0 | hsa-miR-42 | 263052  | 0.413187 |
| 22.25    | 4   | 0 | 0 | 0.619251 | false | 0 | hsa-miR-42 | 1842    | 0.625    |
| 108.8333 | 6   | 0 | 0 | 0.685027 | false | 0 | NFKB1      | 18640   | 0.449306 |
| 92.66667 | 3   | 0 | 0 | 0.627273 | false | 0 | ELL2       | 4560    | 0.485009 |
| 17.625   | 40  | 0 | 0 | 0.662032 | false | 0 | hsa-miR-37 | 151288  | 0.4375   |
| 106      | 5   | 0 | 0 | 0.664706 | false | 0 | CDK7       | 12246   | 0.472973 |
| 15.59322 | 59  | 0 | 0 | 0.682353 | false | 0 | hsa-miR-37 | 383680  | 0.384032 |
| 92       | 1   | 0 | 0 | 0.520321 | false | 0 | TP73       | 0       | 0        |
| 73       | 2   | 0 | 0 | 0.553476 | false | 0 | HAND2      | 1226    | 0.595041 |
| 54.85714 | 7   | 0 | 0 | 0.639037 | false | 0 | TP63       | 11490   | 0.274781 |
| 97.66667 | 9   | 0 | 0 | 0.695722 | false | 0 | RBBP5      | 32700   | 0.391363 |
| 15.05435 | 92  | 0 | 0 | 0.719786 | false | 0 | hsa-miR-37 | 1002966 | 0.351359 |
| 43.5     | 2   | 0 | 0 | 0.492513 | false | 0 | XBP1       | 324     | 0.653846 |
| 52       | 1   | 0 | 0 | 0.475401 | false | 0 | PITX3      | 0       | 0        |
| 86       | 3   | 0 | 0 | 0.598396 | false | 0 | RUNX2      | 3660    | 0.524691 |
| 110.8571 | 7   | 0 | 0 | 0.703209 | false | 0 | ETV1       | 33394   | 0.429129 |
| 97.33333 | 3   | 0 | 0 | 0.614439 | false | 0 | APOBEC3B   | 4606    | 0.544256 |
| 64       | 2   | 0 | 0 | 0.537433 | false | 0 | IKZF1      | 928     | 0.59434  |
| 52       | 1   | 0 | 0 | 0.475401 | false | 0 | BACH2      | 0       | 0        |

|          |     |   |   |          |       |   |            |         |          |
|----------|-----|---|---|----------|-------|---|------------|---------|----------|
| 52       | 1   | 0 | 0 | 0.475401 | false | 0 | ASH2L      | 0       | 0        |
| 52       | 1   | 0 | 0 | 0.475401 | false | 0 | JARID2     | 0       | 0        |
| 14.51923 | 52  | 0 | 0 | 0.674866 | false | 0 | hsa-miR-36 | 774216  | 0.355769 |
| 113      | 1   | 0 | 0 | 0.542781 | false | 0 | TCF21      | 0       | 0        |
| 98.77778 | 9   | 0 | 0 | 0.709626 | false | 0 | HCFC1      | 46580   | 0.376068 |
| 113      | 1   | 0 | 0 | 0.542781 | false | 0 | GFI1B      | 0       | 0        |
| 107.5    | 2   | 0 | 0 | 0.591979 | false | 0 | LDB1       | 1826    | 0.678344 |
| 102.5    | 2   | 0 | 0 | 0.577005 | false | 0 | PIAS1      | 972     | 0.70979  |
| 87.14286 | 7   | 0 | 0 | 0.687166 | false | 0 | PBX1       | 24650   | 0.357439 |
| 122.5714 | 7   | 0 | 0 | 0.720321 | false | 0 | E2F3       | 41684   | 0.446954 |
| 72       | 2   | 0 | 0 | 0.555615 | false | 0 | ATF4       | 654     | 0.577236 |
| 106.75   | 4   | 0 | 0 | 0.654011 | false | 0 | FOX M1     | 10100   | 0.496479 |
| 125.5    | 2   | 0 | 0 | 0.612299 | false | 0 | FOXK1      | 2416    | 0.707386 |
| 95.5     | 4   | 0 | 0 | 0.637968 | false | 0 | NFKB2      | 7062    | 0.477273 |
| 137      | 4   | 0 | 0 | 0.680749 | false | 0 | MYBL2      | 13308   | 0.571429 |
| 104      | 8   | 0 | 0 | 0.696791 | false | 0 | BCL6       | 30336   | 0.413655 |
| 91.5     | 2   | 0 | 0 | 0.564171 | false | 0 | BRD1       | 994     | 0.69084  |
| 99.69231 | 13  | 0 | 0 | 0.737433 | false | 0 | KMT2D      | 81890   | 0.349973 |
| 113      | 1   | 0 | 0 | 0.542781 | false | 0 | NCOR1      | 0       | 0        |
| 91.5     | 2   | 0 | 0 | 0.564171 | false | 0 | ING5       | 994     | 0.69084  |
| 108.7    | 10  | 0 | 0 | 0.732086 | false | 0 | FGFR1      | 64800   | 0.384643 |
| 13.61062 | 113 | 0 | 0 | 0.742246 | false | 0 | hsa-miR-36 | 2032508 | 0.315265 |
| 67.5     | 6   | 0 | 0 | 0.643316 | false | 0 | DNMT3A     | 13302   | 0.330846 |
| 59.33333 | 6   | 0 | 0 | 0.643316 | false | 0 | YAP1       | 9446    | 0.290216 |
| 55       | 1   | 0 | 0 | 0.480749 | false | 0 | HOXB13     | 0       | 0        |
| 76.16667 | 6   | 0 | 0 | 0.635829 | false | 0 | ELF3       | 10590   | 0.387457 |
| 104.2    | 5   | 0 | 0 | 0.659358 | false | 0 | KDM4A      | 11688   | 0.475576 |
| 31.5     | 2   | 0 | 0 | 0.485027 | false | 0 | DMC1       | 376     | 0.535088 |
| 97       | 12  | 0 | 0 | 0.735294 | false | 0 | KMT2A      | 80030   | 0.341637 |
| 55       | 1   | 0 | 0 | 0.480749 | false | 0 | DAXX       | 0       | 0        |
| 55       | 1   | 0 | 0 | 0.480749 | false | 0 | FOXP1      | 0       | 0        |
| 97.85714 | 7   | 0 | 0 | 0.670053 | false | 0 | TRIM24     | 19978   | 0.430476 |
| 93.2     | 5   | 0 | 0 | 0.654011 | false | 0 | ZNF263     | 11546   | 0.434906 |
| 15.70909 | 55  | 0 | 0 | 0.680214 | false | 0 | hsa-miR-31 | 673398  | 0.367727 |
| 143      | 1   | 0 | 0 | 0.573797 | false | 0 | AML1-ETO   | 0       | 0        |
| 106.5    | 2   | 0 | 0 | 0.600535 | false | 0 | CHD1       | 1662    | 0.635542 |
| 111.25   | 4   | 0 | 0 | 0.663636 | false | 0 | JMJD1C     | 9160    | 0.496622 |
| 106.5    | 2   | 0 | 0 | 0.600535 | false | 0 | PDX1       | 1662    | 0.635542 |
| 91.05882 | 17  | 0 | 0 | 0.757754 | true  | 0 | MYB        | 140112  | 0.303228 |
| 94.25    | 8   | 0 | 0 | 0.69893  | false | 0 | EZH2       | 29686   | 0.371514 |
| 78.16667 | 6   | 0 | 0 | 0.65615  | false | 0 | ZNF384     | 11004   | 0.362285 |
| 79.57143 | 14  | 0 | 0 | 0.74492  | false | 0 | FOS        | 95842   | 0.272817 |
| 122.2    | 5   | 0 | 0 | 0.686096 | false | 0 | GTF2B      | 16176   | 0.500826 |
| 114.7273 | 11  | 0 | 0 | 0.755615 | false | 0 | E2F4       | 105554  | 0.377831 |
| 133.75   | 4   | 0 | 0 | 0.681818 | false | 0 | TAF7       | 13192   | 0.555439 |
| 103.875  | 16  | 0 | 0 | 0.76631  | true  | 0 | RUNX3      | 160520  | 0.336193 |
| 66.5     | 6   | 0 | 0 | 0.65508  | false | 0 | CEBPA      | 10342   | 0.308962 |

|          |    |   |   |          |       |   |         |        |          |
|----------|----|---|---|----------|-------|---|---------|--------|----------|
| 97.66667 | 12 | 0 | 0 | 0.734225 | false | 0 | REST    | 82210  | 0.345238 |
| 111.6667 | 3  | 0 | 0 | 0.641176 | false | 0 | MED26   | 5454   | 0.547855 |
| 122.5    | 2  | 0 | 0 | 0.618717 | false | 0 | SMAD4   | 2092   | 0.667582 |
| 83.44444 | 18 | 0 | 0 | 0.760963 | true  | 0 | STAT3   | 152440 | 0.275734 |
| 122.25   | 4  | 0 | 0 | 0.670053 | false | 0 | RUNX1T1 | 10772  | 0.531798 |
| 121.6667 | 3  | 0 | 0 | 0.641176 | false | 0 | DCP1A   | 5666   | 0.594417 |
| 140.5    | 2  | 0 | 0 | 0.63262  | false | 0 | ZEB1    | 2810   | 0.715385 |
| 89.95238 | 21 | 0 | 0 | 0.782353 | true  | 0 | TCF3    | 227578 | 0.281495 |
| 143      | 1  | 0 | 0 | 0.573797 | false | 0 | PAF1    | 0      | 0        |
| 105.875  | 8  | 0 | 0 | 0.72139  | false | 0 | TCF4    | 44506  | 0.38557  |
| 107.375  | 8  | 0 | 0 | 0.716043 | false | 0 | ATF1    | 47636  | 0.398408 |
| 108.3    | 10 | 0 | 0 | 0.726738 | false | 0 | CBFB    | 61342  | 0.390182 |
| 118.6667 | 3  | 0 | 0 | 0.651872 | false | 0 | STAT5A  | 7108   | 0.555031 |
| 88       | 3  | 0 | 0 | 0.619786 | false | 0 | LYL1    | 2904   | 0.47541  |
| 116      | 3  | 0 | 0 | 0.640107 | false | 0 | PRDM11  | 5098   | 0.572139 |
| 105.5714 | 7  | 0 | 0 | 0.702139 | false | 0 | KDM1A   | 29570  | 0.410084 |
| 99       | 6  | 0 | 0 | 0.689305 | false | 0 | PBX3    | 23550  | 0.401639 |
| 130.8    | 5  | 0 | 0 | 0.688235 | false | 0 | HNF4A   | 17082  | 0.531967 |
| 123.5714 | 7  | 0 | 0 | 0.711765 | false | 0 | NELFA   | 37572  | 0.464286 |
| 132.3333 | 3  | 0 | 0 | 0.658289 | false | 0 | RFX5    | 7134   | 0.602446 |
| 76.66667 | 3  | 0 | 0 | 0.599465 | false | 0 | ESRRA   | 3064   | 0.461382 |
| 108      | 3  | 0 | 0 | 0.636898 | false | 0 | MAF     | 6192   | 0.537688 |
| 87       | 8  | 0 | 0 | 0.703209 | false | 0 | NR2F1   | 33714  | 0.337255 |
| 99.27778 | 18 | 0 | 0 | 0.774866 | true  | 0 | EGR1    | 195730 | 0.314993 |
| 100.6667 | 3  | 0 | 0 | 0.629412 | false | 0 | PPARG   | 4412   | 0.521815 |
| 91.30769 | 13 | 0 | 0 | 0.751337 | false | 0 | TFAP4   | 104168 | 0.306128 |
| 130.6667 | 3  | 0 | 0 | 0.664706 | false | 0 | SMARCB1 | 9114   | 0.578869 |
| 109      | 4  | 0 | 0 | 0.660428 | false | 0 | ING2    | 11264  | 0.493151 |
| 96       | 9  | 0 | 0 | 0.704278 | false | 0 | FOSL2   | 40132  | 0.372549 |
| 99.4     | 10 | 0 | 0 | 0.726738 | false | 0 | RCOR1   | 62310  | 0.357818 |
| 140.5    | 2  | 0 | 0 | 0.63262  | false | 0 | NR1H2   | 2810   | 0.715385 |
| 117.2    | 5  | 0 | 0 | 0.685027 | false | 0 | USF2    | 13968  | 0.482158 |
| 105.125  | 8  | 0 | 0 | 0.710695 | false | 0 | GATA2   | 39452  | 0.397424 |
| 115.875  | 8  | 0 | 0 | 0.707487 | false | 0 | CDK8    | 37772  | 0.443533 |
| 101.375  | 8  | 0 | 0 | 0.705348 | false | 0 | USF1    | 35836  | 0.390564 |
| 121.6667 | 3  | 0 | 0 | 0.641176 | false | 0 | AFF4    | 5666   | 0.594417 |
| 127      | 2  | 0 | 0 | 0.620856 | false | 0 | GTF2F1  | 2808   | 0.681081 |
| 120.25   | 4  | 0 | 0 | 0.664706 | false | 0 | UBTF    | 7466   | 0.534753 |
| 126.5    | 2  | 0 | 0 | 0.628342 | false | 0 | HDAC1   | 2776   | 0.657068 |
| 106.5    | 6  | 0 | 0 | 0.687166 | false | 0 | BATF    | 24282  | 0.43595  |
| 112.9    | 10 | 0 | 0 | 0.725668 | false | 0 | PML     | 65224  | 0.408394 |
| 127      | 2  | 0 | 0 | 0.620856 | false | 0 | INTS11  | 2808   | 0.681081 |
| 90.84211 | 19 | 0 | 0 | 0.760963 | true  | 0 | MED1    | 162134 | 0.301484 |
| 97.61538 | 13 | 0 | 0 | 0.737433 | false | 0 | CREBBP  | 88328  | 0.342608 |
| 102.875  | 8  | 0 | 0 | 0.717112 | false | 0 | SFPQ    | 42032  | 0.380131 |
| 109.6    | 5  | 0 | 0 | 0.691444 | false | 0 | TBL1XR1 | 23078  | 0.439676 |
| 95.13333 | 15 | 0 | 0 | 0.763102 | true  | 0 | TBP     | 139498 | 0.309649 |

|          |     |   |   |          |       |   |            |         |          |
|----------|-----|---|---|----------|-------|---|------------|---------|----------|
| 135      | 2   | 0 | 0 | 0.634759 | false | 0 | SREBF1     | 3060    | 0.680203 |
| 90.22222 | 9   | 0 | 0 | 0.716043 | false | 0 | ATF3       | 46042   | 0.335422 |
| 99.9375  | 16  | 0 | 0 | 0.753476 | true  | 0 | SUPT5H     | 139344  | 0.336522 |
| 103.2222 | 9   | 0 | 0 | 0.710695 | false | 0 | LEO1       | 38072   | 0.391656 |
| 133.75   | 4   | 0 | 0 | 0.681818 | false | 0 | NFATC1     | 13192   | 0.555439 |
| 115.1818 | 11  | 0 | 0 | 0.740642 | false | 0 | NELFE      | 87278   | 0.397846 |
| 80.15789 | 19  | 0 | 0 | 0.762032 | true  | 0 | JUND       | 166718  | 0.264742 |
| 97.55556 | 9   | 0 | 0 | 0.720321 | false | 0 | GRHL2      | 53960   | 0.357613 |
| 103.1667 | 12  | 0 | 0 | 0.736364 | false | 0 | BCOR       | 78294   | 0.362293 |
| 11.48252 | 143 | 0 | 0 | 0.773262 | false | 0 | hsa-miR-31 | 2734662 | 0.268783 |
| 99.52632 | 19  | 0 | 0 | 0.782353 | true  | 0 | NOTCH1     | 218828  | 0.309831 |
| 89.25    | 4   | 0 | 0 | 0.628342 | false | 0 | VDR        | 5092    | 0.466931 |
| 84.83333 | 6   | 0 | 0 | 0.671123 | false | 0 | SMAD3      | 14590   | 0.36931  |
| 96.47368 | 19  | 0 | 0 | 0.770588 | true  | 0 | KDM2B      | 179590  | 0.310989 |
| 101.6111 | 18  | 0 | 0 | 0.780214 | true  | 0 | CREB1      | 215364  | 0.317385 |
| 102.8333 | 6   | 0 | 0 | 0.670053 | false | 0 | KDM4C      | 16628   | 0.45059  |
| 111.8889 | 9   | 0 | 0 | 0.712834 | false | 0 | RARA       | 44142   | 0.421631 |
| 100.6842 | 19  | 0 | 0 | 0.779144 | true  | 0 | LARP7      | 219972  | 0.316458 |
| 101.5    | 8   | 0 | 0 | 0.696791 | false | 0 | TRIM25     | 28322   | 0.403614 |
| 97.33333 | 15  | 0 | 0 | 0.758824 | true  | 0 | RELA       | 125692  | 0.321111 |
| 91.57143 | 21  | 0 | 0 | 0.772727 | true  | 0 | PHF8       | 202328  | 0.295021 |
| 129.75   | 4   | 0 | 0 | 0.685027 | false | 0 | BCL3       | 14182   | 0.532025 |
| 86.4     | 10  | 0 | 0 | 0.67861  | false | 0 | FOXO1      | 25170   | 0.371304 |
| 82.63636 | 22  | 0 | 0 | 0.786631 | true  | 0 | ZNF143     | 217830  | 0.255913 |
| 107.25   | 8   | 0 | 0 | 0.70107  | false | 0 | SETD1A     | 32964   | 0.41996  |
| 97.35    | 20  | 0 | 0 | 0.791979 | true  | 0 | E2F1       | 261036  | 0.295552 |
| 103.5385 | 13  | 0 | 0 | 0.753476 | false | 0 | NRF1       | 104668  | 0.345247 |
| 106.6667 | 6   | 0 | 0 | 0.680749 | false | 0 | BRPF3      | 22000   | 0.44774  |
| 89.29412 | 17  | 0 | 0 | 0.754545 | true  | 0 | SMC1A      | 132594  | 0.30032  |
| 90.95455 | 22  | 0 | 0 | 0.78984  | true  | 0 | MAZ        | 264512  | 0.279362 |
| 94.9375  | 16  | 0 | 0 | 0.751337 | true  | 0 | YY1        | 124622  | 0.321704 |
| 101.5333 | 15  | 0 | 0 | 0.748128 | true  | 0 | CXXC1      | 104722  | 0.346667 |
| 96       | 8   | 0 | 0 | 0.703209 | false | 0 | ZMYND8     | 38392   | 0.372549 |
| 108      | 4   | 0 | 0 | 0.665775 | false | 0 | MYOD1      | 7070    | 0.477679 |
| 82.42857 | 14  | 0 | 0 | 0.732086 | false | 0 | EBF1       | 76366   | 0.295031 |
| 75.5     | 8   | 0 | 0 | 0.674332 | false | 0 | NFIC       | 23276   | 0.326754 |
| 99.58824 | 17  | 0 | 0 | 0.762032 | true  | 0 | GATA1      | 163014  | 0.327536 |
| 98.52941 | 17  | 0 | 0 | 0.763102 | true  | 0 | ZBTB7A     | 164192  | 0.322945 |
| 100.0667 | 15  | 0 | 0 | 0.755615 | true  | 0 | FLI1       | 117910  | 0.333558 |
| 102.7333 | 15  | 0 | 0 | 0.765241 | true  | 0 | NFE2       | 144092  | 0.332462 |
| 90.17647 | 17  | 0 | 0 | 0.754545 | true  | 0 | TAL1       | 138414  | 0.303321 |
| 102      | 16  | 0 | 0 | 0.757754 | true  | 0 | CHD8       | 129906  | 0.338926 |
| 107.9    | 10  | 0 | 0 | 0.716043 | false | 0 | TAF3       | 50578   | 0.403396 |
| 112.5    | 8   | 0 | 0 | 0.72246  | false | 0 | NFYB       | 47486   | 0.408425 |
| 111.5455 | 11  | 0 | 0 | 0.736364 | false | 0 | CBX3       | 72582   | 0.39062  |
| 113.7273 | 11  | 0 | 0 | 0.742781 | false | 0 | KLF11      | 83106   | 0.39006  |
| 82.16    | 25  | 0 | 0 | 0.793048 | true  | 0 | CTCF       | 280520  | 0.25205  |

|          |    |   |   |          |       |   |            |         |          |
|----------|----|---|---|----------|-------|---|------------|---------|----------|
| 100.25   | 16 | 0 | 0 | 0.770588 | true  | 0 | KLF1       | 157368  | 0.320161 |
| 98.55556 | 18 | 0 | 0 | 0.764171 | true  | 0 | MYCN       | 167878  | 0.323032 |
| 92.66667 | 3  | 0 | 0 | 0.597326 | false | 0 | KAT7       | 3072    | 0.569358 |
| 96.2     | 15 | 0 | 0 | 0.749198 | true  | 0 | SRF        | 112570  | 0.327148 |
| 98.5     | 2  | 0 | 0 | 0.572727 | false | 0 | BACH1      | 894     | 0.701439 |
| 106.9091 | 11 | 0 | 0 | 0.742781 | false | 0 | ASXL1      | 85048   | 0.366467 |
| 122      | 8  | 0 | 0 | 0.724599 | false | 0 | NFYA       | 47654   | 0.44     |
| 92.4     | 20 | 0 | 0 | 0.771658 | true  | 0 | TAF1       | 188120  | 0.29772  |
| 88.875   | 16 | 0 | 0 | 0.750267 | true  | 0 | RAD21      | 108448  | 0.301976 |
| 82.30769 | 13 | 0 | 0 | 0.735294 | false | 0 | TP53       | 80498   | 0.290385 |
| 106.4286 | 7  | 0 | 0 | 0.680749 | false | 0 | MYH11      | 20334   | 0.448632 |
| 92.83333 | 18 | 0 | 0 | 0.763102 | true  | 0 | HEY1       | 167932  | 0.305094 |
| 106.5714 | 14 | 0 | 0 | 0.754545 | false | 0 | MBD3       | 111290  | 0.355459 |
| 100.4    | 10 | 0 | 0 | 0.723529 | false | 0 | SMAD1      | 60040   | 0.365441 |
| 106.5385 | 13 | 0 | 0 | 0.750267 | false | 0 | IRF1       | 108554  | 0.358974 |
| 103.75   | 8  | 0 | 0 | 0.709626 | false | 0 | BRD3       | 40410   | 0.393678 |
| 108.6667 | 12 | 0 | 0 | 0.738503 | false | 0 | WDR5       | 83404   | 0.379108 |
| 95.47368 | 19 | 0 | 0 | 0.774866 | true  | 0 | STAT1      | 198266  | 0.303774 |
| 91.25    | 8  | 0 | 0 | 0.693583 | false | 0 | SMC3       | 27258   | 0.36687  |
| 96.16667 | 6  | 0 | 0 | 0.692513 | false | 0 | NR1H3      | 23448   | 0.38529  |
| 104.5833 | 12 | 0 | 0 | 0.740642 | false | 0 | JUN        | 87420   | 0.362179 |
| 80.56522 | 23 | 0 | 0 | 0.785562 | true  | 0 | SPI1       | 232842  | 0.250994 |
| 94.66667 | 3  | 0 | 0 | 0.600535 | false | 0 | FOXP2      | 2460    | 0.571138 |
| 90.84615 | 13 | 0 | 0 | 0.729947 | false | 0 | STAG1      | 71320   | 0.326713 |
| 14.86316 | 95 | 0 | 0 | 0.721925 | false | 0 | hsa-miR-31 | 1127870 | 0.355466 |
| 105.8    | 10 | 0 | 0 | 0.729947 | false | 0 | CHD2       | 57488   | 0.376978 |
| 60.5     | 2  | 0 | 0 | 0.548128 | false | 0 | DDX5       | 452     | 0.512931 |
| 96.33333 | 9  | 0 | 0 | 0.714973 | false | 0 | BRCA1      | 46894   | 0.359748 |
| 116.1667 | 6  | 0 | 0 | 0.708556 | false | 0 | ZBTB33     | 30250   | 0.439567 |
| 13.25    | 8  | 0 | 0 | 0.624599 | false | 0 | hsa-miR-14 | 14094   | 0.35     |
| 104.3333 | 6  | 0 | 0 | 0.687166 | false | 0 | SOX2       | 21578   | 0.426997 |
| 108.7143 | 14 | 0 | 0 | 0.770588 | false | 0 | SIN3A      | 153274  | 0.345238 |
| 101.7273 | 11 | 0 | 0 | 0.735294 | false | 0 | KLF5       | 77942   | 0.357189 |
| 100.375  | 16 | 0 | 0 | 0.766631 | true  | 0 | GABPA      | 150742  | 0.324755 |
| 89.90909 | 11 | 0 | 0 | 0.716043 | false | 0 | FOXA2      | 59876   | 0.336777 |
| 66       | 3  | 0 | 0 | 0.590909 | false | 0 | MAFF       | 2324    | 0.419355 |
| 88.31579 | 19 | 0 | 0 | 0.782353 | true  | 0 | E2F6       | 194484  | 0.274578 |
| 47.33333 | 3  | 0 | 0 | 0.539572 | false | 0 | TLE3       | 968     | 0.433022 |
| 90.11111 | 18 | 0 | 0 | 0.774866 | true  | 0 | NR3C1      | 186240  | 0.285613 |
| 120      | 3  | 0 | 0 | 0.649733 | false | 0 | KDM5D      | 5870    | 0.566667 |
| 63.375   | 8  | 0 | 0 | 0.660428 | false | 0 | TET2       | 18042   | 0.290116 |
| 88.05263 | 19 | 0 | 0 | 0.76738  | true  | 0 | GATA3      | 189518  | 0.286357 |
| 75.36667 | 30 | 0 | 0 | 0.809091 | true  | 0 | FOXA1      | 390646  | 0.223996 |
| 79       | 2  | 0 | 0 | 0.555615 | false | 0 | POU5F1     | 768     | 0.634146 |
| 103.8333 | 6  | 0 | 0 | 0.694652 | false | 0 | HDAC2      | 24222   | 0.412985 |
| 102.6667 | 3  | 0 | 0 | 0.639037 | false | 0 | SMAD2      | 5402    | 0.508333 |
| 96.90909 | 22 | 0 | 0 | 0.78877  | true  | 0 | ELF1       | 284256  | 0.298782 |

|          |    |   |   |          |       |   |            |        |          |
|----------|----|---|---|----------|-------|---|------------|--------|----------|
| 90.625   | 24 | 0 | 0 | 0.793048 | true  | 0 | RUNX1      | 307922 | 0.277477 |
| 97       | 13 | 0 | 0 | 0.754545 | false | 0 | TCF7L2     | 112678 | 0.322148 |
| 92.42105 | 19 | 0 | 0 | 0.770588 | true  | 0 | TRIM28     | 179318 | 0.297788 |
| 111      | 4  | 0 | 0 | 0.67861  | false | 0 | SMARCA4    | 14934  | 0.466102 |
| 88.66667 | 3  | 0 | 0 | 0.61016  | false | 0 | NIPBL      | 3188   | 0.506744 |
| 87.42308 | 26 | 0 | 0 | 0.798396 | true  | 0 | ERG        | 342632 | 0.265101 |
| 81.41176 | 17 | 0 | 0 | 0.758824 | true  | 0 | SUMO2      | 216970 | 0.269838 |
| 90       | 7  | 0 | 0 | 0.681818 | false | 0 | GATA4      | 24348  | 0.377119 |
| 85.54545 | 22 | 0 | 0 | 0.778075 | true  | 0 | ARNTL      | 226142 | 0.27185  |
| 74       | 27 | 0 | 0 | 0.795187 | true  | 0 | ESR1       | 293900 | 0.226708 |
| 103.8333 | 12 | 0 | 0 | 0.748128 | false | 0 | TEAD4      | 107606 | 0.350967 |
| 81.62963 | 27 | 0 | 0 | 0.802674 | true  | 0 | HIF1A      | 354380 | 0.245075 |
| 99.18182 | 11 | 0 | 0 | 0.742781 | false | 0 | NR2F2      | 87744  | 0.339729 |
| 80.06897 | 29 | 0 | 0 | 0.798396 | true  | 0 | BRD4       | 354484 | 0.244796 |
| 98.16667 | 6  | 0 | 0 | 0.675401 | false | 0 | EOMES      | 18330  | 0.420635 |
| 66.5     | 2  | 0 | 0 | 0.538503 | false | 0 | GATA6      | 958    | 0.61215  |
| 71.16667 | 6  | 0 | 0 | 0.660428 | false | 0 | KMT2C      | 15368  | 0.323349 |
| 84.66667 | 6  | 0 | 0 | 0.663636 | false | 0 | PAX5       | 13522  | 0.380303 |
| 63       | 1  | 0 | 0 | 0.489305 | false | 0 | STAT5B     | 0      | 0        |
| 73.37931 | 29 | 0 | 0 | 0.794118 | true  | 0 | AR         | 318292 | 0.226894 |
| 106.7143 | 7  | 0 | 0 | 0.711765 | false | 0 | BHLHE40    | 37210  | 0.400433 |
| 111.6667 | 3  | 0 | 0 | 0.642246 | false | 0 | FOXH1      | 4932   | 0.545156 |
| 86.65385 | 26 | 0 | 0 | 0.802674 | true  | 0 | KDM5B      | 350706 | 0.259557 |
| 89.61111 | 18 | 0 | 0 | 0.769519 | true  | 0 | TFAP2A     | 173268 | 0.288636 |
| 92.82353 | 17 | 0 | 0 | 0.749198 | true  | 0 | MXI1       | 136134 | 0.317728 |
| 85.19048 | 21 | 0 | 0 | 0.774866 | true  | 0 | CEBPB      | 221804 | 0.272461 |
| 82.64286 | 28 | 0 | 0 | 0.803743 | true  | 0 | EP300      | 380728 | 0.248155 |
| 70.2     | 5  | 0 | 0 | 0.63262  | false | 0 | AHR        | 9506   | 0.360417 |
| 89.32    | 25 | 0 | 0 | 0.797326 | true  | 0 | MYC        | 333884 | 0.27092  |
| 90.27273 | 22 | 0 | 0 | 0.787701 | true  | 0 | SP1        | 276386 | 0.278977 |
| 71.16667 | 6  | 0 | 0 | 0.660428 | false | 0 | GTF2I      | 10906  | 0.323349 |
| 91.04762 | 21 | 0 | 0 | 0.777005 | true  | 0 | TCF12      | 236194 | 0.289542 |
| 91.25    | 16 | 0 | 0 | 0.748128 | true  | 0 | CNOT3      | 117206 | 0.312284 |
| 82.90476 | 21 | 0 | 0 | 0.772727 | true  | 0 | TFAP2C     | 201456 | 0.266791 |
| 82.33333 | 6  | 0 | 0 | 0.664706 | false | 0 | LMNA       | 14210  | 0.368024 |
| 99.5625  | 16 | 0 | 0 | 0.764171 | true  | 0 | ETS1       | 149984 | 0.324219 |
| 80.89655 | 29 | 0 | 0 | 0.800535 | true  | 0 | MAX        | 373166 | 0.245836 |
| 76.66667 | 9  | 0 | 0 | 0.697861 | false | 0 | SNAI2      | 37274  | 0.303882 |
| 98.57143 | 7  | 0 | 0 | 0.707487 | false | 0 | HNF4G      | 33604  | 0.375275 |
| 79       | 2  | 0 | 0 | 0.555615 | false | 0 | CTNNB1     | 768    | 0.634146 |
| 86.33333 | 6  | 0 | 0 | 0.662567 | false | 0 | NKX2-1     | 14546  | 0.38965  |
| 90.16667 | 12 | 0 | 0 | 0.725668 | false | 0 | PGR        | 70234  | 0.327819 |
| 94.05    | 20 | 0 | 0 | 0.773797 | true  | 0 | CTCF       | 205056 | 0.301133 |
| 100      | 8  | 0 | 0 | 0.686096 | false | 0 | CDK9       | 27904  | 0.414226 |
| 62.33333 | 6  | 0 | 0 | 0.628342 | false | 0 | MAFK       | 8786   | 0.327986 |
| 77.75    | 4  | 0 | 0 | 0.639037 | false | 0 | NANOG      | 7366   | 0.385678 |
| 13.42857 | 63 | 0 | 0 | 0.68877  | false | 0 | hsa-miR-12 | 809378 | 0.310714 |



ICoefficient
