# Supplementary material for: [Retracted] Shared Genetic and Epigenetic Mechanisms between the Osteogenic Differentiation of Dental Pulp Stem Cells and Bone Marrow Stem Cells
Source: Hindawi journal article supplement (doi:10.1155/2021/6697810), 2021-01-01
Supplement: f5 [file 6697810.f5.pdf]

| SUID | AverageSho | Betweenne | ClosenessC | ClusteringC | Degree | Eccentricity | IsSingleNo | lab      | name       |
|------|------------|-----------|------------|-------------|--------|--------------|------------|----------|------------|
| 100  | 2.908602   | 0.000331  | 0.343808   | 0           | 16     | 5            | false      | miRNA_do | hsa-miR-6f |
| 101  | 2.96595    | 4.96E-05  | 0.33716    | 0           | 7      | 5            | false      | miRNA_do | hsa-miR-54 |
| 102  | 2.933692   | 0.000219  | 0.340867   | 0           | 8      | 5            | false      | miRNA_do | hsa-miR-48 |
| 103  | 3.069892   | 6.52E-06  | 0.325744   | 0           | 2      | 5            | false      | miRNA_up | hsa-miR-47 |
| 104  | 3.634409   | 0         | 0.275148   | 0           | 1      | 4            | false      | TF       | BDP1       |
| 105  | 3.634409   | 0         | 0.275148   | 0           | 1      | 4            | false      | TF       | TBL1Y      |
| 106  | 3.634409   | 0         | 0.275148   | 0           | 1      | 4            | false      | TF       | MAF        |
| 107  | 2.636201   | 0.02267   | 0.379334   | 0           | 86     | 3            | false      | miRNA_do | hsa-miR-45 |
| 108  | 3.849462   | 0         | 0.259777   | 0           | 1      | 6            | false      | TF       | ATF4       |
| 109  | 2.851254   | 0.004755  | 0.350723   | 0           | 31     | 5            | false      | miRNA_up | hsa-miR-45 |
| 110  | 3.673835   | 0         | 0.272195   | 0           | 1      | 6            | false      | TF       | CDK12      |
| 111  | 2.675627   | 0.01342   | 0.373744   | 0           | 79     | 5            | false      | miRNA_up | hsa-miR-45 |
| 112  | 2.922939   | 0.000492  | 0.342121   | 0           | 13     | 5            | false      | miRNA_up | hsa-miR-44 |
| 113  | 3.738351   | 0         | 0.267498   | 0           | 1      | 6            | false      | TF       | MEF2B      |
| 114  | 2.740143   | 0.010125  | 0.364944   | 0           | 62     | 5            | false      | miRNA_up | hsa-miR-44 |
| 115  | 3.817204   | 0         | 0.261972   | 0           | 1      | 5            | false      | TF       | PRDM14     |
| 116  | 2.818996   | 0.005624  | 0.354736   | 0           | 38     | 4            | false      | miRNA_up | hsa-miR-44 |
| 117  | 2.18638    | 0         | 0.457377   | 0           | 1      | 4            | false      | TF       | HMBX1      |
| 118  | 2.18638    | 0         | 0.457377   | 0           | 1      | 4            | false      | TF       | GMEB2      |
| 119  | 2.18638    | 0         | 0.457377   | 0           | 1      | 4            | false      | TF       | ARRB1      |
| 120  | 2.18638    | 0         | 0.457377   | 0           | 1      | 4            | false      | TF       | PAX7       |
| 121  | 2.18638    | 0         | 0.457377   | 0           | 1      | 4            | false      | TF       | INO80      |
| 122  | 2.18638    | 0         | 0.457377   | 0           | 1      | 4            | false      | TF       | AHCTF1     |
| 123  | 2.18638    | 0         | 0.457377   | 0           | 1      | 4            | false      | TF       | AGO2       |
| 124  | 2.18638    | 0         | 0.457377   | 0           | 1      | 4            | false      | TF       | NR2C2      |
| 125  | 2.18638    | 0         | 0.457377   | 0           | 1      | 4            | false      | TF       | NCAPG      |
| 126  | 2.18638    | 0         | 0.457377   | 0           | 1      | 4            | false      | TF       | VEZF1      |
| 127  | 2.18638    | 0         | 0.457377   | 0           | 1      | 4            | false      | TF       | SP4        |
| 128  | 2.18638    | 0         | 0.457377   | 0           | 1      | 4            | false      | TF       | ORC2       |
| 129  | 2.18638    | 0         | 0.457377   | 0           | 1      | 4            | false      | TF       | AGO1       |
| 130  | 2.18638    | 0         | 0.457377   | 0           | 1      | 4            | false      | TF       | DR1        |
| 131  | 2.18638    | 0         | 0.457377   | 0           | 1      | 4            | false      | TF       | ID3        |
| 132  | 2.18638    | 0         | 0.457377   | 0           | 1      | 4            | false      | TF       | TCF7L1     |
| 133  | 2.18638    | 0         | 0.457377   | 0           | 1      | 4            | false      | TF       | NKX3-1     |
| 134  | 2.18638    | 0         | 0.457377   | 0           | 1      | 4            | false      | TF       | LIN9       |
| 135  | 2.18638    | 0         | 0.457377   | 0           | 1      | 4            | false      | TF       | ARNT2      |
| 136  | 2.18638    | 0         | 0.457377   | 0           | 1      | 4            | false      | TF       | FOXR2      |
| 137  | 2.18638    | 0         | 0.457377   | 0           | 1      | 4            | false      | TF       | HJURP      |
| 138  | 2.18638    | 0         | 0.457377   | 0           | 1      | 4            | false      | TF       | TOP1       |
| 139  | 2.18638    | 0         | 0.457377   | 0           | 1      | 4            | false      | TF       | KAT5       |
| 140  | 2.18638    | 0         | 0.457377   | 0           | 1      | 4            | false      | TF       | NR5A2      |
| 141  | 2.164875   | 0.000106  | 0.461921   | 0           | 2      | 4            | false      | TF       | BPTF       |
| 142  | 2.18638    | 0         | 0.457377   | 0           | 1      | 4            | false      | TF       | SGF29      |
| 143  | 2.18638    | 0         | 0.457377   | 0           | 1      | 4            | false      | TF       | HOXC9      |
| 144  | 2.168459   | 7.4E-05   | 0.461157   | 0           | 2      | 4            | false      | TF       | SOX2       |
| 145  | 2.18638    | 0         | 0.457377   | 0           | 1      | 4            | false      | TF       | LDB1       |

|     |          |          |          |   |   |         |    |         |
|-----|----------|----------|----------|---|---|---------|----|---------|
| 146 | 2.18638  | 0        | 0.457377 | 0 | 1 | 4 false | TF | ATF1    |
| 147 | 2.18638  | 0        | 0.457377 | 0 | 1 | 4 false | TF | HHEX    |
| 148 | 2.18638  | 0        | 0.457377 | 0 | 1 | 4 false | TF | HDAC3   |
| 149 | 2.18638  | 0        | 0.457377 | 0 | 1 | 4 false | TF | XRCC4   |
| 150 | 2.18638  | 0        | 0.457377 | 0 | 1 | 4 false | TF | HOXB8   |
| 151 | 2.18638  | 0        | 0.457377 | 0 | 1 | 4 false | TF | CDK6    |
| 152 | 2.18638  | 0        | 0.457377 | 0 | 1 | 4 false | TF | ZNF84   |
| 153 | 2.18638  | 0        | 0.457377 | 0 | 1 | 4 false | TF | ZNF280D |
| 154 | 2.18638  | 0        | 0.457377 | 0 | 1 | 4 false | TF | OGT     |
| 155 | 2.18638  | 0        | 0.457377 | 0 | 1 | 4 false | TF | L3MBTL3 |
| 156 | 2.164875 | 0.000106 | 0.461921 | 0 | 2 | 4 false | TF | TBL1XR1 |
| 157 | 2.18638  | 0        | 0.457377 | 0 | 1 | 4 false | TF | LEF1    |
| 158 | 2.18638  | 0        | 0.457377 | 0 | 1 | 4 false | TF | PCGF1   |
| 159 | 2.182796 | 0.0012   | 0.458128 | 0 | 2 | 4 false | TF | LMO2    |
| 160 | 2.18638  | 0        | 0.457377 | 0 | 1 | 4 false | TF | NFAT5   |
| 161 | 2.18638  | 0        | 0.457377 | 0 | 1 | 4 false | TF | TRRAP   |
| 162 | 2.18638  | 0        | 0.457377 | 0 | 1 | 4 false | TF | E2F7    |
| 163 | 2.18638  | 0        | 0.457377 | 0 | 1 | 4 false | TF | FANCD2  |
| 164 | 2.168459 | 7.4E-05  | 0.461157 | 0 | 2 | 4 false | TF | LYL1    |
| 165 | 2.18638  | 0        | 0.457377 | 0 | 1 | 4 false | TF | USP7    |
| 166 | 2.18638  | 0        | 0.457377 | 0 | 1 | 4 false | TF | ZNF395  |
| 167 | 2.18638  | 0        | 0.457377 | 0 | 1 | 4 false | TF | WRN     |
| 168 | 2.18638  | 0        | 0.457377 | 0 | 1 | 4 false | TF | EZH1    |
| 169 | 2.18638  | 0        | 0.457377 | 0 | 1 | 4 false | TF | ZKSCAN1 |
| 170 | 2.18638  | 0        | 0.457377 | 0 | 1 | 4 false | TF | HDAC6   |
| 171 | 2.18638  | 0        | 0.457377 | 0 | 1 | 4 false | TF | NPAT    |
| 172 | 2.18638  | 0        | 0.457377 | 0 | 1 | 4 false | TF | NSD2    |
| 173 | 2.18638  | 0        | 0.457377 | 0 | 1 | 4 false | TF | MAP2K1  |
| 174 | 2.18638  | 0        | 0.457377 | 0 | 1 | 4 false | TF | TERF1   |
| 175 | 2.18638  | 0        | 0.457377 | 0 | 1 | 4 false | TF | ZC3H8   |
| 176 | 2.18638  | 0        | 0.457377 | 0 | 1 | 4 false | TF | ELL     |
| 177 | 2.18638  | 0        | 0.457377 | 0 | 1 | 4 false | TF | ASH1L   |
| 178 | 2.18638  | 0        | 0.457377 | 0 | 1 | 4 false | TF | EHF     |
| 179 | 2.18638  | 0        | 0.457377 | 0 | 1 | 4 false | TF | HEYL    |
| 180 | 2.164875 | 0.000106 | 0.461921 | 0 | 2 | 4 false | TF | CUX1    |
| 181 | 2.18638  | 0        | 0.457377 | 0 | 1 | 4 false | TF | MED12   |
| 182 | 2.18638  | 0        | 0.457377 | 0 | 1 | 4 false | TF | SPDEF   |
| 183 | 2.18638  | 0        | 0.457377 | 0 | 1 | 4 false | TF | ARID3A  |
| 184 | 2.18638  | 0        | 0.457377 | 0 | 1 | 4 false | TF | DDX5    |
| 185 | 2.18638  | 0        | 0.457377 | 0 | 1 | 4 false | TF | SMN1    |
| 186 | 2.18638  | 0        | 0.457377 | 0 | 1 | 4 false | TF | ICE2    |
| 187 | 2.18638  | 0        | 0.457377 | 0 | 1 | 4 false | TF | OVOL2   |
| 188 | 2.18638  | 0        | 0.457377 | 0 | 1 | 4 false | TF | SMARCC2 |
| 189 | 2.18638  | 0        | 0.457377 | 0 | 1 | 4 false | TF | SUPT20H |
| 190 | 2.18638  | 0        | 0.457377 | 0 | 1 | 4 false | TF | TFAM    |
| 191 | 2.18638  | 0        | 0.457377 | 0 | 1 | 4 false | TF | GLYR1   |
| 192 | 2.18638  | 0        | 0.457377 | 0 | 1 | 4 false | TF | INTS13  |

|     |          |          |          |   |   |         |    |          |
|-----|----------|----------|----------|---|---|---------|----|----------|
| 193 | 2.18638  | 0        | 0.457377 | 0 | 1 | 4 false | TF | SAG      |
| 194 | 2.18638  | 0        | 0.457377 | 0 | 1 | 4 false | TF | TAF2     |
| 195 | 2.18638  | 0        | 0.457377 | 0 | 1 | 4 false | TF | BANP     |
| 196 | 2.18638  | 0        | 0.457377 | 0 | 1 | 4 false | TF | SNAPC4   |
| 197 | 2.18638  | 0        | 0.457377 | 0 | 1 | 4 false | TF | MLLT3    |
| 198 | 2.18638  | 0        | 0.457377 | 0 | 1 | 4 false | TF | FOXK1    |
| 199 | 2.18638  | 0        | 0.457377 | 0 | 1 | 4 false | TF | MAPK1    |
| 200 | 2.18638  | 0        | 0.457377 | 0 | 1 | 4 false | TF | SCML2    |
| 201 | 2.18638  | 0        | 0.457377 | 0 | 1 | 4 false | TF | NCOA4    |
| 202 | 2.18638  | 0        | 0.457377 | 0 | 1 | 4 false | TF | GLI2     |
| 203 | 2.18638  | 0        | 0.457377 | 0 | 1 | 4 false | TF | THAP11   |
| 204 | 2.18638  | 0        | 0.457377 | 0 | 1 | 4 false | TF | F2RL1    |
| 205 | 2.18638  | 0        | 0.457377 | 0 | 1 | 4 false | TF | PDX1     |
| 206 | 2.18638  | 0        | 0.457377 | 0 | 1 | 4 false | TF | SNAPC1   |
| 207 | 2.18638  | 0        | 0.457377 | 0 | 1 | 4 false | TF | KAT2B    |
| 208 | 2.18638  | 0        | 0.457377 | 0 | 1 | 4 false | TF | E2F8     |
| 209 | 2.18638  | 0        | 0.457377 | 0 | 1 | 4 false | TF | CBX2     |
| 210 | 2.18638  | 0        | 0.457377 | 0 | 1 | 4 false | TF | T        |
| 211 | 2.18638  | 0        | 0.457377 | 0 | 1 | 4 false | TF | NR2E3    |
| 212 | 2.18638  | 0        | 0.457377 | 0 | 1 | 4 false | TF | RB1      |
| 213 | 2.18638  | 0        | 0.457377 | 0 | 1 | 4 false | TF | IRF3     |
| 214 | 2.18638  | 0        | 0.457377 | 0 | 1 | 4 false | TF | RELB     |
| 215 | 2.18638  | 0        | 0.457377 | 0 | 1 | 4 false | TF | FXR1     |
| 216 | 2.18638  | 0        | 0.457377 | 0 | 1 | 4 false | TF | CDK2     |
| 217 | 2.168459 | 9.22E-05 | 0.461157 | 0 | 2 | 4 false | TF | SIX2     |
| 218 | 2.146953 | 0.000193 | 0.465776 | 0 | 3 | 4 false | TF | BCLAF1   |
| 219 | 2.18638  | 0        | 0.457377 | 0 | 1 | 4 false | TF | CBX8     |
| 220 | 2.18638  | 0        | 0.457377 | 0 | 1 | 4 false | TF | GREB1    |
| 221 | 2.18638  | 0        | 0.457377 | 0 | 1 | 4 false | TF | KDM3A    |
| 222 | 2.18638  | 0        | 0.457377 | 0 | 1 | 4 false | TF | E2F2     |
| 223 | 2.18638  | 0        | 0.457377 | 0 | 1 | 4 false | TF | CTBP1    |
| 224 | 2.18638  | 0        | 0.457377 | 0 | 1 | 4 false | TF | JMJD1C   |
| 225 | 2.18638  | 0        | 0.457377 | 0 | 1 | 4 false | TF | XRN2     |
| 226 | 2.18638  | 0        | 0.457377 | 0 | 1 | 4 false | TF | PPARGC1A |
| 227 | 2.18638  | 0        | 0.457377 | 0 | 1 | 4 false | TF | BMI1     |
| 228 | 2.18638  | 0        | 0.457377 | 0 | 1 | 4 false | TF | HECTD1   |
| 229 | 2.168459 | 9.22E-05 | 0.461157 | 0 | 2 | 4 false | TF | KDM3B    |
| 230 | 2.18638  | 0        | 0.457377 | 0 | 1 | 4 false | TF | MEF2C    |
| 231 | 2.18638  | 0        | 0.457377 | 0 | 1 | 4 false | TF | KDM6B    |
| 232 | 2.18638  | 0        | 0.457377 | 0 | 1 | 4 false | TF | BRD7     |
| 233 | 2.18638  | 0        | 0.457377 | 0 | 1 | 4 false | TF | CASP8AP2 |
| 234 | 2.18638  | 0        | 0.457377 | 0 | 1 | 4 false | TF | BCL11A   |
| 235 | 2.18638  | 0        | 0.457377 | 0 | 1 | 4 false | TF | CIITA    |
| 236 | 2.18638  | 0        | 0.457377 | 0 | 1 | 4 false | TF | MAFB     |
| 237 | 2.18638  | 0        | 0.457377 | 0 | 1 | 4 false | TF | FUS      |
| 238 | 2.18638  | 0        | 0.457377 | 0 | 1 | 4 false | TF | MORC2    |
| 239 | 2.18638  | 0        | 0.457377 | 0 | 1 | 4 false | TF | HNRNPL   |

|     |          |          |          |   |   |         |    |          |
|-----|----------|----------|----------|---|---|---------|----|----------|
| 240 | 2.18638  | 0        | 0.457377 | 0 | 1 | 4 false | TF | MBD4     |
| 241 | 2.18638  | 0        | 0.457377 | 0 | 1 | 4 false | TF | TERF2    |
| 242 | 2.18638  | 0        | 0.457377 | 0 | 1 | 4 false | TF | CHD4     |
| 243 | 2.18638  | 0        | 0.457377 | 0 | 1 | 4 false | TF | CHD3     |
| 244 | 2.18638  | 0        | 0.457377 | 0 | 1 | 4 false | TF | ID2      |
| 245 | 2.18638  | 0        | 0.457377 | 0 | 1 | 4 false | TF | ZC3H11A  |
| 246 | 2.18638  | 0        | 0.457377 | 0 | 1 | 4 false | TF | KDM5D    |
| 247 | 2.18638  | 0        | 0.457377 | 0 | 1 | 4 false | TF | PBX2     |
| 248 | 2.18638  | 0        | 0.457377 | 0 | 1 | 4 false | TF | CCNT1    |
| 249 | 2.18638  | 0        | 0.457377 | 0 | 1 | 4 false | TF | MXD3     |
| 250 | 2.164875 | 0.000106 | 0.461921 | 0 | 2 | 4 false | TF | RBL1     |
| 251 | 2.164875 | 0.000106 | 0.461921 | 0 | 2 | 4 false | TF | SUZ12    |
| 252 | 2.164875 | 0.000106 | 0.461921 | 0 | 2 | 4 false | TF | BRF1     |
| 253 | 2.18638  | 0        | 0.457377 | 0 | 1 | 4 false | TF | BACH1    |
| 254 | 2.164875 | 0.000106 | 0.461921 | 0 | 2 | 4 false | TF | SREBF2   |
| 255 | 2.18638  | 0        | 0.457377 | 0 | 1 | 4 false | TF | SIRT6    |
| 256 | 2.18638  | 0        | 0.457377 | 0 | 1 | 4 false | TF | NCAPG2   |
| 257 | 2.18638  | 0        | 0.457377 | 0 | 1 | 4 false | TF | BARX1    |
| 258 | 2.18638  | 0        | 0.457377 | 0 | 1 | 4 false | TF | CTBP2    |
| 259 | 2.18638  | 0        | 0.457377 | 0 | 1 | 4 false | TF | PRKCQ    |
| 260 | 2.18638  | 0        | 0.457377 | 0 | 1 | 4 false | TF | EPCAM    |
| 261 | 2.18638  | 0        | 0.457377 | 0 | 1 | 4 false | TF | NR1D1    |
| 262 | 2.18638  | 0        | 0.457377 | 0 | 1 | 4 false | TF | ZNF12    |
| 263 | 2.18638  | 0        | 0.457377 | 0 | 1 | 4 false | TF | STAT2    |
| 264 | 2.18638  | 0        | 0.457377 | 0 | 1 | 4 false | TF | SMARCA4  |
| 265 | 2.18638  | 0        | 0.457377 | 0 | 1 | 4 false | TF | NFYC     |
| 266 | 2.168459 | 9.22E-05 | 0.461157 | 0 | 2 | 4 false | TF | MEF2A    |
| 267 | 2.18638  | 0        | 0.457377 | 0 | 1 | 4 false | TF | EED      |
| 268 | 2.164875 | 0.000106 | 0.461921 | 0 | 2 | 4 false | TF | PIAS1    |
| 269 | 2.18638  | 0        | 0.457377 | 0 | 1 | 4 false | TF | JAZF1    |
| 270 | 2.18638  | 0        | 0.457377 | 0 | 1 | 4 false | TF | HSF2     |
| 271 | 2.18638  | 0        | 0.457377 | 0 | 1 | 4 false | TF | LMNB1    |
| 272 | 2.18638  | 0        | 0.457377 | 0 | 1 | 4 false | TF | BRF2     |
| 273 | 2.18638  | 0        | 0.457377 | 0 | 1 | 4 false | TF | PALB2    |
| 274 | 2.18638  | 0        | 0.457377 | 0 | 1 | 4 false | TF | NCOA3    |
| 275 | 2.18638  | 0        | 0.457377 | 0 | 1 | 4 false | TF | ZNF217   |
| 276 | 2.18638  | 0        | 0.457377 | 0 | 1 | 4 false | TF | HOXB4    |
| 277 | 2.18638  | 0        | 0.457377 | 0 | 1 | 4 false | TF | AML1-ETO |
| 278 | 2.18638  | 0        | 0.457377 | 0 | 1 | 4 false | TF | WRNIP1   |
| 279 | 2.18638  | 0        | 0.457377 | 0 | 1 | 4 false | TF | HNF1A    |
| 280 | 2.18638  | 0        | 0.457377 | 0 | 1 | 4 false | TF | KDM6A    |
| 281 | 2.18638  | 0        | 0.457377 | 0 | 1 | 4 false | TF | GFI1B    |
| 282 | 2.18638  | 0        | 0.457377 | 0 | 1 | 4 false | TF | ELF2     |
| 283 | 2.18638  | 0        | 0.457377 | 0 | 1 | 4 false | TF | SMARCC1  |
| 284 | 2.18638  | 0        | 0.457377 | 0 | 1 | 4 false | TF | DNMT3B   |
| 285 | 2.18638  | 0        | 0.457377 | 0 | 1 | 4 false | TF | FOXP2    |
| 286 | 2.18638  | 0        | 0.457377 | 0 | 1 | 4 false | TF | ZBTB16   |

|     |          |          |          |   |   |         |    |          |
|-----|----------|----------|----------|---|---|---------|----|----------|
| 287 | 2.18638  | 0        | 0.457377 | 0 | 1 | 4 false | TF | SVIL     |
| 288 | 2.18638  | 0        | 0.457377 | 0 | 1 | 4 false | TF | SAP30    |
| 289 | 2.18638  | 0        | 0.457377 | 0 | 1 | 4 false | TF | ZNF274   |
| 290 | 2.18638  | 0        | 0.457377 | 0 | 1 | 4 false | TF | ELK4     |
| 291 | 2.18638  | 0        | 0.457377 | 0 | 1 | 4 false | TF | RXRA     |
| 292 | 2.18638  | 0        | 0.457377 | 0 | 1 | 4 false | TF | CBX6     |
| 293 | 2.18638  | 0        | 0.457377 | 0 | 1 | 4 false | TF | NR4A1    |
| 294 | 2.164875 | 0.000106 | 0.461921 | 0 | 2 | 4 false | TF | RBPJ     |
| 295 | 2.18638  | 0        | 0.457377 | 0 | 1 | 4 false | TF | HDAC8    |
| 296 | 2.168459 | 7.4E-05  | 0.461157 | 0 | 2 | 4 false | TF | SIX5     |
| 297 | 2.18638  | 0        | 0.457377 | 0 | 1 | 4 false | TF | PRKDC    |
| 298 | 2.18638  | 0        | 0.457377 | 0 | 1 | 4 false | TF | PRAME    |
| 299 | 2.18638  | 0        | 0.457377 | 0 | 1 | 4 false | TF | CHD7     |
| 300 | 2.18638  | 0        | 0.457377 | 0 | 1 | 4 false | TF | NUP98    |
| 301 | 2.168459 | 7.4E-05  | 0.461157 | 0 | 2 | 4 false | TF | RUNX2    |
| 302 | 2.18638  | 0        | 0.457377 | 0 | 1 | 4 false | TF | DMC1     |
| 303 | 2.18638  | 0        | 0.457377 | 0 | 1 | 4 false | TF | KLF15    |
| 304 | 2.164875 | 0.000106 | 0.461921 | 0 | 2 | 4 false | TF | NCOA1    |
| 305 | 2.18638  | 0        | 0.457377 | 0 | 1 | 4 false | TF | GRHL3    |
| 306 | 2.18638  | 0        | 0.457377 | 0 | 1 | 4 false | TF | RYBP     |
| 307 | 2.18638  | 0        | 0.457377 | 0 | 1 | 4 false | TF | ID1      |
| 308 | 2.18638  | 0        | 0.457377 | 0 | 1 | 4 false | TF | HAND1    |
| 309 | 2.18638  | 0        | 0.457377 | 0 | 1 | 4 false | TF | CDKN1B   |
| 310 | 2.18638  | 0        | 0.457377 | 0 | 1 | 4 false | TF | C17orf49 |
| 311 | 2.18638  | 0        | 0.457377 | 0 | 1 | 4 false | TF | IRF2     |
| 312 | 2.18638  | 0        | 0.457377 | 0 | 1 | 4 false | TF | TET3     |
| 313 | 2.18638  | 0        | 0.457377 | 0 | 1 | 4 false | TF | HOXD11   |
| 314 | 2.18638  | 0        | 0.457377 | 0 | 1 | 4 false | TF | HOXC11   |
| 315 | 2.18638  | 0        | 0.457377 | 0 | 1 | 4 false | TF | TEAD1    |
| 316 | 2.18638  | 0        | 0.457377 | 0 | 1 | 4 false | TF | DOT1L    |
| 317 | 2.18638  | 0        | 0.457377 | 0 | 1 | 4 false | TF | HOXA13   |
| 318 | 2.18638  | 0        | 0.457377 | 0 | 1 | 4 false | TF | LRWD1    |
| 319 | 2.18638  | 0        | 0.457377 | 0 | 1 | 4 false | TF | SMAD5    |
| 320 | 2.18638  | 0        | 0.457377 | 0 | 1 | 4 false | TF | SMARCA2  |
| 321 | 2.18638  | 0        | 0.457377 | 0 | 1 | 4 false | TF | FOXH1    |
| 322 | 2.18638  | 0        | 0.457377 | 0 | 1 | 4 false | TF | ZNF581   |
| 323 | 2.18638  | 0        | 0.457377 | 0 | 1 | 4 false | TF | SMAD2    |
| 324 | 2.164875 | 0.000106 | 0.461921 | 0 | 2 | 4 false | TF | WWTR1    |
| 325 | 2.18638  | 0        | 0.457377 | 0 | 1 | 4 false | TF | CTNNB1   |
| 326 | 2.18638  | 0        | 0.457377 | 0 | 1 | 4 false | TF | MTA3     |
| 327 | 2.18638  | 0        | 0.457377 | 0 | 1 | 4 false | TF | SIX1     |
| 328 | 2.18638  | 0        | 0.457377 | 0 | 1 | 4 false | TF | CEBPZ    |
| 329 | 2.18638  | 0        | 0.457377 | 0 | 1 | 4 false | TF | NCOR2    |
| 330 | 2.18638  | 0        | 0.457377 | 0 | 1 | 4 false | TF | HNF1B    |
| 331 | 2.18638  | 0        | 0.457377 | 0 | 1 | 4 false | TF | HES4     |
| 332 | 2.18638  | 0        | 0.457377 | 0 | 1 | 4 false | TF | BRD9     |
| 333 | 2.18638  | 0        | 0.457377 | 0 | 1 | 4 false | TF | GRHL1    |

|     |          |          |          |   |     |         |          |            |
|-----|----------|----------|----------|---|-----|---------|----------|------------|
| 334 | 2.18638  | 0        | 0.457377 | 0 | 1   | 4 false | TF       | ZFHX4      |
| 335 | 2.18638  | 0        | 0.457377 | 0 | 1   | 4 false | TF       | ATF7       |
| 336 | 2.18638  | 0        | 0.457377 | 0 | 1   | 4 false | TF       | NFKB2      |
| 337 | 2.18638  | 0        | 0.457377 | 0 | 1   | 4 false | TF       | AFF1       |
| 338 | 2.18638  | 0        | 0.457377 | 0 | 1   | 4 false | TF       | ESRRA      |
| 339 | 2.18638  | 0        | 0.457377 | 0 | 1   | 4 false | TF       | RFX2       |
| 340 | 2.164875 | 0.000106 | 0.461921 | 0 | 2   | 4 false | TF       | HIRA       |
| 341 | 2.18638  | 0        | 0.457377 | 0 | 1   | 4 false | TF       | CBX7       |
| 342 | 2.179211 | 0.000194 | 0.458882 | 0 | 2   | 4 false | TF       | TET2       |
| 343 | 2.175627 | 0.00015  | 0.459638 | 0 | 2   | 4 false | TF       | ASCL1      |
| 344 | 2.18638  | 0        | 0.457377 | 0 | 1   | 4 false | TF       | HOXA5      |
| 345 | 2.18638  | 0        | 0.457377 | 0 | 1   | 4 false | TF       | SETDB1     |
| 346 | 2.164875 | 0.000106 | 0.461921 | 0 | 2   | 4 false | TF       | MYBL2      |
| 347 | 2.18638  | 0        | 0.457377 | 0 | 1   | 4 false | TF       | HDAC4      |
| 348 | 2.18638  | 0        | 0.457377 | 0 | 1   | 4 false | TF       | SETX       |
| 349 | 2.18638  | 0        | 0.457377 | 0 | 1   | 4 false | TF       | KAT2A      |
| 350 | 2.18638  | 0        | 0.457377 | 0 | 1   | 4 false | TF       | LMO3       |
| 351 | 2.18638  | 0        | 0.457377 | 0 | 1   | 4 false | TF       | ETV5       |
| 352 | 2.18638  | 0        | 0.457377 | 0 | 1   | 4 false | TF       | NEUROD1    |
| 353 | 2.18638  | 0        | 0.457377 | 0 | 1   | 4 false | TF       | HOXA11     |
| 354 | 2.18638  | 0        | 0.457377 | 0 | 1   | 4 false | TF       | SMARCE1    |
| 355 | 2.18638  | 0        | 0.457377 | 0 | 1   | 4 false | TF       | ATF6       |
| 356 | 2.18638  | 0        | 0.457377 | 0 | 1   | 4 false | TF       | HOXC8      |
| 357 | 2.18638  | 0        | 0.457377 | 0 | 1   | 4 false | TF       | RNF2       |
| 358 | 2.18638  | 0        | 0.457377 | 0 | 1   | 4 false | TF       | SMARCA1    |
| 359 | 2.18638  | 0        | 0.457377 | 0 | 1   | 4 false | TF       | KMT2C      |
| 360 | 2.18638  | 0        | 0.457377 | 0 | 1   | 4 false | TF       | HOXC13     |
| 361 | 2.18638  | 0        | 0.457377 | 0 | 1   | 4 false | TF       | POU2AF1    |
| 362 | 2.18638  | 0        | 0.457377 | 0 | 1   | 4 false | TF       | EHMT2      |
| 363 | 2.18638  | 0        | 0.457377 | 0 | 1   | 4 false | TF       | POU2F1     |
| 364 | 2.18638  | 0        | 0.457377 | 0 | 1   | 4 false | TF       | KDM5A      |
| 365 | 2.18638  | 0        | 0.457377 | 0 | 1   | 4 false | TF       | CAMTA1     |
| 366 | 2.18638  | 0        | 0.457377 | 0 | 1   | 4 false | TF       | MDM2       |
| 367 | 2.18638  | 0        | 0.457377 | 0 | 1   | 4 false | TF       | MRE11      |
| 368 | 1.188172 | 0.830715 | 0.841629 | 0 | 490 | 3 false | miRNA_up | hsa-miR-44 |
| 369 | 2.18638  | 0        | 0.457377 | 0 | 1   | 4 false | TF       | MBD2       |
| 370 | 2.175627 | 0.000121 | 0.459638 | 0 | 2   | 4 false | TF       | JMJD6      |
| 371 | 3.810036 | 0        | 0.262465 | 0 | 1   | 6 false | TF       | TLX1       |
| 372 | 2.811828 | 0.006491 | 0.355641 | 0 | 42  | 5 false | miRNA_do | hsa-miR-43 |
| 373 | 2.175627 | 0.000121 | 0.459638 | 0 | 2   | 4 false | TF       | ZNF750     |
| 374 | 3.81362  | 0        | 0.262218 | 0 | 1   | 6 false | TF       | APOBEC3B   |
| 375 | 2.179211 | 0.000105 | 0.458882 | 0 | 2   | 4 false | TF       | JUNB       |
| 376 | 2.815412 | 0.005332 | 0.355188 | 0 | 41  | 5 false | miRNA_up | hsa-miR-42 |
| 377 | 3.863799 | 0        | 0.258813 | 0 | 1   | 6 false | TF       | TGFB1      |
| 378 | 2.865591 | 0.004751 | 0.348968 | 0 | 26  | 5 false | miRNA_up | hsa-miR-42 |
| 379 | 2.175627 | 4.19E-05 | 0.459638 | 0 | 2   | 4 false | TF       | KDM4A      |
| 380 | 2.175627 | 4.19E-05 | 0.459638 | 0 | 2   | 4 false | TF       | LMNA       |

|     |          |          |          |   |    |   |       |          |            |
|-----|----------|----------|----------|---|----|---|-------|----------|------------|
| 381 | 2.175627 | 4.19E-05 | 0.459638 | 0 | 2  | 4 | false | TF       | TLE3       |
| 382 | 2.743728 | 0.004804 | 0.364468 | 0 | 59 | 5 | false | miRNA_up | hsa-miR-37 |
| 383 | 3.888889 | 0        | 0.257143 | 0 | 1  | 6 | false | TF       | IL6        |
| 384 | 3.888889 | 0        | 0.257143 | 0 | 1  | 6 | false | TF       | LIN28A     |
| 385 | 2.172043 | 0.000386 | 0.460396 | 0 | 2  | 4 | false | TF       | HOXB13     |
| 386 | 2.890681 | 0.007902 | 0.345939 | 0 | 20 | 5 | false | miRNA_do | hsa-miR-37 |
| 387 | 2.150538 | 0.000153 | 0.465    | 0 | 3  | 4 | false | TF       | CREBBP     |
| 388 | 2.16129  | 7.36E-05 | 0.462687 | 0 | 2  | 4 | false | TF       | FOXP1      |
| 389 | 2.157706 | 0.000118 | 0.463455 | 0 | 3  | 4 | false | TF       | MYH11      |
| 390 | 2.16129  | 7.36E-05 | 0.462687 | 0 | 2  | 4 | false | TF       | HDAC1      |
| 391 | 3.648746 | 0        | 0.274067 | 0 | 1  | 5 | false | TF       | ZFX        |
| 392 | 2.650538 | 0.014318 | 0.377282 | 0 | 83 | 4 | false | miRNA_up | hsa-miR-36 |
| 393 | 2.175627 | 5.1E-05  | 0.459638 | 0 | 2  | 4 | false | TF       | HDAC2      |
| 394 | 2.164875 | 0.000184 | 0.461921 | 0 | 3  | 4 | false | TF       | RUNX1T1    |
| 395 | 2.164875 | 0.000184 | 0.461921 | 0 | 3  | 4 | false | TF       | PRDM5      |
| 396 | 2.175627 | 5.1E-05  | 0.459638 | 0 | 2  | 4 | false | TF       | GATA4      |
| 397 | 2.164875 | 0.00021  | 0.461921 | 0 | 3  | 4 | false | TF       | AHR        |
| 398 | 2.16129  | 0.000131 | 0.462687 | 0 | 3  | 4 | false | TF       | GRHL2      |
| 399 | 2.175627 | 5.1E-05  | 0.459638 | 0 | 2  | 4 | false | TF       | NANOG      |
| 400 | 2.175627 | 5.1E-05  | 0.459638 | 0 | 2  | 4 | false | TF       | ZMYND8     |
| 401 | 2.175627 | 5.1E-05  | 0.459638 | 0 | 2  | 4 | false | TF       | BRD2       |
| 402 | 2.139785 | 0.000794 | 0.467337 | 0 | 6  | 4 | false | TF       | GATA2      |
| 403 | 2.66129  | 0.012593 | 0.375758 | 0 | 82 | 5 | false | miRNA_do | hsa-miR-32 |
| 404 | 2.175627 | 6.97E-05 | 0.459638 | 0 | 2  | 4 | false | TF       | SMAD4      |
| 405 | 2.175627 | 6.97E-05 | 0.459638 | 0 | 2  | 4 | false | TF       | MITF       |
| 406 | 2.154122 | 0.000151 | 0.464226 | 0 | 3  | 4 | false | TF       | VDR        |
| 407 | 2.175627 | 6.97E-05 | 0.459638 | 0 | 2  | 4 | false | TF       | PRDM1      |
| 408 | 3.72043  | 0        | 0.268786 | 0 | 1  | 6 | false | TF       | NKX2-1     |
| 409 | 2.175627 | 6.97E-05 | 0.459638 | 0 | 2  | 4 | false | TF       | DAXX       |
| 410 | 2.150538 | 0.00034  | 0.465    | 0 | 4  | 4 | false | TF       | DNMT3A     |
| 411 | 2.175627 | 6.97E-05 | 0.459638 | 0 | 2  | 4 | false | TF       | ESR2       |
| 412 | 2.722222 | 0.010133 | 0.367347 | 0 | 67 | 5 | false | miRNA_up | hsa-miR-31 |
| 413 | 2.168459 | 0.00018  | 0.461157 | 0 | 3  | 4 | false | TF       | SMAD3      |
| 414 | 2.143369 | 0.000359 | 0.466555 | 0 | 4  | 4 | false | TF       | KDM4C      |
| 415 | 3.623656 | 1.03E-05 | 0.275964 | 0 | 2  | 6 | false | TF       | HAND2      |
| 416 | 2.933692 | 0.001009 | 0.340867 | 0 | 17 | 5 | false | miRNA_up | hsa-miR-31 |
| 417 | 2.182796 | 0.000198 | 0.458128 | 0 | 2  | 4 | false | TF       | JARID2     |
| 418 | 2.143369 | 0.000537 | 0.466555 | 0 | 5  | 4 | false | TF       | EZH2       |
| 419 | 2.944444 | 0.000166 | 0.339623 | 0 | 11 | 5 | false | miRNA_up | hsa-miR-31 |
| 420 | 2.136201 | 0.000371 | 0.468121 | 0 | 5  | 4 | false | TF       | ZNF384     |
| 421 | 2.168459 | 4.96E-05 | 0.461157 | 0 | 2  | 4 | false | TF       | ZEB1       |
| 422 | 2.168459 | 4.96E-05 | 0.461157 | 0 | 2  | 4 | false | TF       | BATF       |
| 423 | 2.157706 | 0.000275 | 0.463455 | 0 | 4  | 4 | false | TF       | BCL3       |
| 424 | 2.168459 | 4.96E-05 | 0.461157 | 0 | 2  | 4 | false | TF       | NFE2L2     |
| 425 | 2.132616 | 0.000502 | 0.468908 | 0 | 6  | 4 | false | TF       | USF1       |
| 426 | 2.154122 | 0.000242 | 0.464226 | 0 | 4  | 4 | false | TF       | USF2       |
| 427 | 3.555556 | 7.15E-06 | 0.28125  | 0 | 2  | 6 | false | TF       | PRDM11     |

|     |          |          |          |   |    |   |       |          |             |
|-----|----------|----------|----------|---|----|---|-------|----------|-------------|
| 428 | 2.632616 | 0.014023 | 0.37985  | 0 | 91 | 5 | false | miRNA_up | hsa-miR-31  |
| 429 | 3.935484 | 0        | 0.254098 | 0 | 1  | 6 | false | TF       | ZBTB48      |
| 430 | 2.937276 | 0.003713 | 0.340451 | 0 | 12 | 5 | false | miRNA_up | hsa-miR-31  |
| 431 | 2.164875 | 6.52E-05 | 0.461921 | 0 | 2  | 4 | false | TF       | SOX9        |
| 432 | 2.164875 | 6.52E-05 | 0.461921 | 0 | 2  | 4 | false | TF       | NIPBL       |
| 433 | 2.157706 | 0.000118 | 0.463455 | 0 | 3  | 4 | false | TF       | HMGN3       |
| 434 | 3.645161 | 0        | 0.274336 | 0 | 1  | 5 | false | TF       | VHL         |
| 435 | 2.150538 | 0.000145 | 0.465    | 0 | 3  | 4 | false | TF       | THAP1       |
| 436 | 2.129032 | 0.000479 | 0.469697 | 0 | 7  | 4 | false | TF       | CBFB        |
| 437 | 2.157706 | 0.000142 | 0.463455 | 0 | 3  | 4 | false | TF       | EPAS1       |
| 438 | 2.157706 | 0.000118 | 0.463455 | 0 | 3  | 4 | false | TF       | CCNT2       |
| 439 | 3.290323 | 5.82E-05 | 0.303922 | 0 | 5  | 5 | false | TF       | NR2F1       |
| 440 | 2.164875 | 6.52E-05 | 0.461921 | 0 | 2  | 4 | false | TF       | ARNT        |
| 441 | 2.164875 | 6.52E-05 | 0.461921 | 0 | 2  | 4 | false | TF       | NR1H2       |
| 442 | 2.121864 | 0.001227 | 0.471284 | 0 | 8  | 4 | false | TF       | NR2F2       |
| 443 | 2.646953 | 0.014201 | 0.377793 | 0 | 85 | 4 | false | miRNA_do | hsa-miR-21  |
| 444 | 2.132616 | 0.000401 | 0.468908 | 0 | 6  | 4 | false | TF       | ZBTB7A      |
| 445 | 2.179211 | 0.000119 | 0.458882 | 0 | 2  | 4 | false | TF       | MECP2       |
| 446 | 2.179211 | 0.000119 | 0.458882 | 0 | 2  | 4 | false | TF       | DNMT1       |
| 447 | 2.887097 | 0.00103  | 0.346369 | 0 | 21 | 5 | false | miRNA_up | hsa-miR-18  |
| 448 | 3.116487 | 1.47E-06 | 0.320874 | 0 | 2  | 5 | false | miRNA_up | hsa-miR-14  |
| 449 | 2.168459 | 0.000347 | 0.461157 | 0 | 3  | 4 | false | TF       | KLF4        |
| 450 | 2.168459 | 0.000313 | 0.461157 | 0 | 3  | 4 | false | TF       | CEBPA       |
| 451 | 2.930108 | 0.000375 | 0.341284 | 0 | 10 | 5 | false | miRNA_do | hsa-miR-13  |
| 452 | 3.551971 | 0.000762 | 0.281534 | 0 | 8  | 4 | false | TF       | GTF2I       |
| 453 | 3.9319   | 0        | 0.25433  | 0 | 1  | 6 | false | TF       | APEX1       |
| 454 | 3.9319   | 0        | 0.25433  | 0 | 1  | 6 | false | TF       | OGG1        |
| 455 | 2.933692 | 0.016207 | 0.340867 | 0 | 10 | 5 | false | miRNA_up | hsa-miR-13  |
| 456 | 3.921147 | 3.85E-05 | 0.255027 | 0 | 2  | 6 | false | TF       | TNFSF12     |
| 457 | 3.921147 | 3.85E-05 | 0.255027 | 0 | 2  | 6 | false | TF       | calcineurin |
| 458 | 4.064516 | 0        | 0.246032 | 0 | 1  | 6 | false | TF       | MRF4        |
| 459 | 4.064516 | 0        | 0.246032 | 0 | 1  | 6 | false | TF       | MYF5        |
| 460 | 3.066308 | 0.008958 | 0.326125 | 0 | 6  | 5 | false | miRNA_up | hsa-miR-13  |
| 461 | 3.921147 | 3.85E-05 | 0.255027 | 0 | 2  | 6 | false | TF       | MYOG        |
| 462 | 2.071685 | 0.003446 | 0.482699 | 0 | 13 | 4 | false | TF       | CEBPB       |
| 463 | 2.146953 | 0.000289 | 0.465776 | 0 | 4  | 4 | false | TF       | SFPQ        |
| 464 | 2.143369 | 0.00014  | 0.466555 | 0 | 3  | 4 | false | TF       | PAF1        |
| 465 | 3.37276  | 4.01E-05 | 0.296493 | 0 | 3  | 6 | false | TF       | TAF3        |
| 466 | 2.146953 | 0.000225 | 0.465776 | 0 | 3  | 4 | false | TF       | UBTF        |
| 467 | 3.46595  | 0        | 0.288521 | 0 | 1  | 6 | false | TF       | ERCC3       |
| 468 | 2.139785 | 0.000206 | 0.467337 | 0 | 3  | 4 | false | TF       | ZBTB33      |
| 469 | 2.139785 | 0.000165 | 0.467337 | 0 | 3  | 4 | false | TF       | IRF4        |
| 470 | 2.143369 | 0.000156 | 0.466555 | 0 | 3  | 4 | false | TF       | POU2F2      |
| 471 | 2.146953 | 0.000164 | 0.465776 | 0 | 3  | 4 | false | TF       | GATAD1      |
| 472 | 2.150538 | 0.000142 | 0.465    | 0 | 3  | 4 | false | TF       | GATA6       |
| 473 | 2.157706 | 8.21E-05 | 0.463455 | 0 | 2  | 4 | false | TF       | RING1       |
| 474 | 2.139785 | 0.000206 | 0.467337 | 0 | 3  | 4 | false | TF       | ASXL1       |



|     |          |          |          |   |     |   |       |          |            |
|-----|----------|----------|----------|---|-----|---|-------|----------|------------|
| 475 | 2.157706 | 8.21E-05 | 0.463455 | 0 | 2   | 4 | false | TF       | ZBTB17     |
| 476 | 2.157706 | 8.21E-05 | 0.463455 | 0 | 2   | 4 | false | TF       | KAT7       |
| 477 | 2.157706 | 8.21E-05 | 0.463455 | 0 | 2   | 4 | false | TF       | GTF2B      |
| 478 | 2.136201 | 0.000261 | 0.468121 | 0 | 4   | 4 | false | TF       | KDM1A      |
| 479 | 2.146953 | 0.000225 | 0.465776 | 0 | 3   | 4 | false | TF       | OTX2       |
| 480 | 3.168459 | 0.000116 | 0.315611 | 0 | 6   | 4 | false | TF       | TRIM24     |
| 481 | 2.157706 | 8.21E-05 | 0.463455 | 0 | 2   | 4 | false | TF       | INTS3      |
| 482 | 2.157706 | 8.21E-05 | 0.463455 | 0 | 2   | 4 | false | TF       | ZMIZ1      |
| 483 | 2.103943 | 0.00061  | 0.475298 | 0 | 8   | 4 | false | TF       | E2F6       |
| 484 | 3.46595  | 0        | 0.288521 | 0 | 1   | 6 | false | TF       | DCP1A      |
| 485 | 2.157706 | 8.21E-05 | 0.463455 | 0 | 2   | 4 | false | TF       | FOXM1      |
| 486 | 2.121864 | 0.000354 | 0.471284 | 0 | 6   | 4 | false | TF       | RARA       |
| 487 | 2.157706 | 8.21E-05 | 0.463455 | 0 | 2   | 4 | false | TF       | CEBPD      |
| 488 | 2.157706 | 8.21E-05 | 0.463455 | 0 | 2   | 4 | false | TF       | INTS11     |
| 489 | 2.157706 | 8.21E-05 | 0.463455 | 0 | 2   | 4 | false | TF       | STAT5A     |
| 490 | 2.157706 | 8.21E-05 | 0.463455 | 0 | 2   | 4 | false | TF       | CSNK2A1    |
| 491 | 2.157706 | 8.21E-05 | 0.463455 | 0 | 2   | 4 | false | TF       | AFF4       |
| 492 | 2.11828  | 0.000803 | 0.472081 | 0 | 7   | 4 | false | TF       | ELF3       |
| 493 | 2.157706 | 8.21E-05 | 0.463455 | 0 | 2   | 4 | false | TF       | ZNF83      |
| 494 | 2.157706 | 8.21E-05 | 0.463455 | 0 | 2   | 4 | false | TF       | CCND2      |
| 495 | 2.150538 | 0.000142 | 0.465    | 0 | 3   | 4 | false | TF       | EOMES      |
| 496 | 2.146953 | 0.000164 | 0.465776 | 0 | 3   | 4 | false | TF       | MED26      |
| 497 | 2.157706 | 8.21E-05 | 0.463455 | 0 | 2   | 4 | false | TF       | TAF7       |
| 498 | 2.157706 | 8.21E-05 | 0.463455 | 0 | 2   | 4 | false | TF       | BRD1       |
| 499 | 2.129032 | 0.000298 | 0.469697 | 0 | 5   | 4 | false | TF       | CXXC1      |
| 500 | 2.139785 | 0.000216 | 0.467337 | 0 | 4   | 4 | false | TF       | PBX1       |
| 501 | 2.157706 | 8.21E-05 | 0.463455 | 0 | 2   | 4 | false | TF       | KLF6       |
| 502 | 2.143369 | 0.000156 | 0.466555 | 0 | 3   | 4 | false | TF       | NFKB1      |
| 503 | 2.132616 | 0.000365 | 0.468908 | 0 | 4   | 4 | false | TF       | PAX5       |
| 504 | 2.143369 | 0.00014  | 0.466555 | 0 | 3   | 4 | false | TF       | NFATC1     |
| 505 | 2.143369 | 0.000156 | 0.466555 | 0 | 3   | 4 | false | TF       | CHD1       |
| 506 | 2.157706 | 8.21E-05 | 0.463455 | 0 | 2   | 4 | false | TF       | ING5       |
| 507 | 2.129032 | 0.000281 | 0.469697 | 0 | 5   | 4 | false | TF       | LEO1       |
| 508 | 2.157706 | 8.21E-05 | 0.463455 | 0 | 2   | 4 | false | TF       | GTF2F1     |
| 509 | 2.132616 | 0.00038  | 0.468908 | 0 | 4   | 4 | false | TF       | BRPF3      |
| 510 | 2.139785 | 0.000216 | 0.467337 | 0 | 4   | 4 | false | TF       | CDK7       |
| 511 | 2.125448 | 0.000312 | 0.470489 | 0 | 5   | 4 | false | TF       | CDK8       |
| 512 | 3.46595  | 0        | 0.288521 | 0 | 1   | 6 | false | TF       | ERCC2      |
| 513 | 2.467742 | 0.042554 | 0.405229 | 0 | 137 | 5 | false | miRNA_up | hsa-miR-12 |
| 514 | 2.139785 | 0.000206 | 0.467337 | 0 | 3   | 4 | false | TF       | SMARCB1    |
| 515 | 2.164875 | 0.000447 | 0.461921 | 0 | 3   | 4 | false | TF       | TP73       |
| 516 | 2.082437 | 0.005379 | 0.480207 | 0 | 9   | 4 | false | TF       | TP63       |
| 517 | 2.182796 | 0.000371 | 0.458128 | 0 | 2   | 4 | false | TF       | POU5F1     |
| 518 | 2.955197 | 9.11E-05 | 0.338387 | 0 | 6   | 5 | false | miRNA_up | hsa-miR-12 |
| 519 | 2.125448 | 0.000321 | 0.470489 | 0 | 5   | 4 | false | TF       | HCFC1      |
| 520 | 2.100358 | 0.000663 | 0.476109 | 0 | 7   | 4 | false | TF       | TBP        |
| 521 | 2.136201 | 0.000228 | 0.468121 | 0 | 4   | 4 | false | TF       | NELFE      |

|     |          |          |          |   |    |         |    |         |
|-----|----------|----------|----------|---|----|---------|----|---------|
| 522 | 2.096774 | 0.001079 | 0.476923 | 0 | 10 | 4 false | TF | FOS     |
| 523 | 2.150538 | 0.000129 | 0.465    | 0 | 3  | 4 false | TF | ICE1    |
| 524 | 2.143369 | 0.000176 | 0.466555 | 0 | 4  | 4 false | TF | NFYB    |
| 525 | 2.143369 | 0.000232 | 0.466555 | 0 | 4  | 4 false | TF | NR1H3   |
| 526 | 2.0681   | 0.001526 | 0.483536 | 0 | 12 | 4 false | TF | E2F1    |
| 527 | 2.09319  | 0.000987 | 0.47774  | 0 | 10 | 4 false | TF | MYB     |
| 528 | 2.136201 | 0.000264 | 0.468121 | 0 | 5  | 4 false | TF | SP2     |
| 529 | 2.096774 | 0.000763 | 0.476923 | 0 | 8  | 4 false | TF | CBX3    |
| 530 | 2.11828  | 0.000438 | 0.472081 | 0 | 6  | 4 false | TF | YY1     |
| 531 | 2.111111 | 0.000541 | 0.473684 | 0 | 7  | 4 false | TF | SIN3A   |
| 532 | 2.164875 | 0.000048 | 0.461921 | 0 | 2  | 4 false | TF | ING2    |
| 533 | 2.075269 | 0.004133 | 0.481865 | 0 | 12 | 4 false | TF | SPI1    |
| 534 | 2.100358 | 0.000775 | 0.476109 | 0 | 8  | 4 false | TF | ETS1    |
| 535 | 2.114695 | 0.000565 | 0.472881 | 0 | 7  | 4 false | TF | FGFR1   |
| 536 | 2.078853 | 0.001289 | 0.481034 | 0 | 11 | 4 false | TF | HEY1    |
| 537 | 2.164875 | 0.000048 | 0.461921 | 0 | 2  | 4 false | TF | STAT5B  |
| 538 | 2.121864 | 0.000668 | 0.471284 | 0 | 7  | 4 false | TF | CNOT3   |
| 539 | 2.139785 | 0.000568 | 0.467337 | 0 | 5  | 4 false | TF | FOSL1   |
| 540 | 2.121864 | 0.000452 | 0.471284 | 0 | 6  | 4 false | TF | BCL6    |
| 541 | 2.071685 | 0.001787 | 0.482699 | 0 | 11 | 4 false | TF | MYCN    |
| 542 | 2.089606 | 0.001158 | 0.478559 | 0 | 11 | 4 false | TF | ELF1    |
| 543 | 2.078853 | 0.001153 | 0.481034 | 0 | 10 | 4 false | TF | RELA    |
| 544 | 2.035842 | 0.00274  | 0.491197 | 0 | 16 | 4 false | TF | HIF1A   |
| 545 | 2.089606 | 0.000894 | 0.478559 | 0 | 10 | 4 false | TF | NOTCH1  |
| 546 | 2.111111 | 0.00075  | 0.473684 | 0 | 9  | 4 false | TF | CTCFL   |
| 547 | 3.114695 | 0.000231 | 0.321059 | 0 | 8  | 4 false | TF | TCF4    |
| 548 | 2.100358 | 0.001151 | 0.476109 | 0 | 10 | 4 false | TF | JUND    |
| 549 | 2.121864 | 0.000494 | 0.471284 | 0 | 5  | 4 false | TF | ATF2    |
| 550 | 2.114695 | 0.000479 | 0.472881 | 0 | 6  | 4 false | TF | YAP1    |
| 551 | 2.150538 | 0.000165 | 0.465    | 0 | 3  | 4 false | TF | RFX5    |
| 552 | 2.050179 | 0.001697 | 0.487762 | 0 | 14 | 4 false | TF | BRD4    |
| 553 | 2.164875 | 0.000048 | 0.461921 | 0 | 2  | 4 false | TF | HOXA6   |
| 554 | 2.121864 | 0.000552 | 0.471284 | 0 | 7  | 4 false | TF | BHLHE40 |
| 555 | 2.154122 | 0.00018  | 0.464226 | 0 | 3  | 4 false | TF | SUMO1   |
| 556 | 2.096774 | 0.000889 | 0.476923 | 0 | 9  | 4 false | TF | EGR1    |
| 557 | 2.111111 | 0.000757 | 0.473684 | 0 | 7  | 4 false | TF | ZNF263  |
| 558 | 2.164875 | 0.000048 | 0.461921 | 0 | 2  | 4 false | TF | SREBF1  |
| 559 | 2.107527 | 0.000667 | 0.47449  | 0 | 8  | 4 false | TF | KMT2D   |
| 560 | 2.164875 | 0.000048 | 0.461921 | 0 | 2  | 4 false | TF | E2F3    |
| 561 | 2.100358 | 0.001876 | 0.476109 | 0 | 10 | 4 false | TF | GATA3   |
| 562 | 2.100358 | 0.000828 | 0.476109 | 0 | 9  | 4 false | TF | JUN     |
| 563 | 2.125448 | 0.000494 | 0.470489 | 0 | 6  | 4 false | TF | BRD3    |
| 564 | 2.114695 | 0.000434 | 0.472881 | 0 | 6  | 4 false | TF | RUNX3   |
| 565 | 2.086022 | 0.002033 | 0.479381 | 0 | 10 | 4 false | TF | SMC1A   |
| 566 | 2.107527 | 0.000654 | 0.47449  | 0 | 7  | 4 false | TF | WDR5    |
| 567 | 2.121864 | 0.002451 | 0.471284 | 0 | 7  | 4 false | TF | MAFK    |
| 568 | 2.086022 | 0.01682  | 0.479381 | 0 | 8  | 4 false | TF | MYOD1   |

|     |          |          |          |   |    |         |    |        |
|-----|----------|----------|----------|---|----|---------|----|--------|
| 569 | 2.114695 | 0.000524 | 0.472881 | 0 | 6  | 4 false | TF | PBX3   |
| 570 | 2.111111 | 0.00071  | 0.473684 | 0 | 8  | 4 false | TF | SRF    |
| 571 | 2.125448 | 0.000564 | 0.470489 | 0 | 6  | 4 false | TF | ATF3   |
| 572 | 2.139785 | 0.000191 | 0.467337 | 0 | 4  | 4 false | TF | CHD2   |
| 573 | 2.032258 | 0.002722 | 0.492063 | 0 | 18 | 4 false | TF | MYC    |
| 574 | 2.143369 | 0.000208 | 0.466555 | 0 | 4  | 4 false | TF | HNF4G  |
| 575 | 3.311828 | 1.78E-05 | 0.301948 | 0 | 3  | 4 false | TF | ETV1   |
| 576 | 2.075269 | 0.001284 | 0.481865 | 0 | 11 | 4 false | TF | EBF1   |
| 577 | 2.010753 | 0.010422 | 0.497326 | 0 | 20 | 4 false | TF | AR     |
| 578 | 2.103943 | 0.000742 | 0.475298 | 0 | 7  | 4 false | TF | RBBP5  |
| 579 | 2.0681   | 0.001237 | 0.483536 | 0 | 12 | 4 false | TF | STAT1  |
| 580 | 2.060932 | 0.001517 | 0.485217 | 0 | 13 | 4 false | TF | TCF12  |
| 581 | 2.132616 | 0.000422 | 0.468908 | 0 | 5  | 4 false | TF | PGR    |
| 582 | 2.11828  | 0.000346 | 0.472081 | 0 | 5  | 4 false | TF | E2F4   |
| 583 | 2.0681   | 0.001403 | 0.483536 | 0 | 12 | 4 false | TF | TRIM28 |
| 584 | 2.064516 | 0.002431 | 0.484375 | 0 | 13 | 4 false | TF | TP53   |
| 585 | 2.09319  | 0.001251 | 0.47774  | 0 | 8  | 4 false | TF | SUMO2  |
| 586 | 2.039427 | 0.002605 | 0.490334 | 0 | 17 | 4 false | TF | ERG    |
| 587 | 2.129032 | 0.000484 | 0.469697 | 0 | 6  | 4 false | TF | NFIC   |
| 588 | 2.071685 | 0.001465 | 0.482699 | 0 | 12 | 4 false | TF | PHF8   |
| 589 | 2.050179 | 0.00182  | 0.487762 | 0 | 15 | 4 false | TF | EP300  |
| 590 | 2.154122 | 0.000102 | 0.464226 | 0 | 3  | 4 false | TF | KLF11  |
| 591 | 2.143369 | 0.000176 | 0.466555 | 0 | 4  | 4 false | TF | NFYA   |
| 592 | 2.143369 | 0.000163 | 0.466555 | 0 | 4  | 4 false | TF | XBP1   |
| 593 | 2.078853 | 0.001169 | 0.481034 | 0 | 10 | 4 false | TF | ZNF143 |
| 594 | 2.046595 | 0.003777 | 0.488616 | 0 | 16 | 4 false | TF | CREB1  |
| 595 | 2.164875 | 0.000048 | 0.461921 | 0 | 2  | 4 false | TF | HOXA4  |
| 596 | 2.064516 | 0.001834 | 0.484375 | 0 | 12 | 4 false | TF | TEAD4  |
| 597 | 2.096774 | 0.000939 | 0.476923 | 0 | 9  | 4 false | TF | TFAP2A |
| 598 | 2.103943 | 0.001217 | 0.475298 | 0 | 7  | 4 false | TF | FOXA2  |
| 599 | 2.089606 | 0.001058 | 0.478559 | 0 | 10 | 4 false | TF | GABPA  |
| 600 | 2.100358 | 0.000741 | 0.476109 | 0 | 9  | 4 false | TF | TAF1   |
| 601 | 2.082437 | 0.00105  | 0.480207 | 0 | 10 | 4 false | TF | SP1    |
| 602 | 2.139785 | 0.001981 | 0.467337 | 0 | 5  | 4 false | TF | MAFF   |
| 603 | 2.11828  | 0.000564 | 0.472081 | 0 | 8  | 4 false | TF | FOXO1  |
| 604 | 2.164875 | 0.000048 | 0.461921 | 0 | 2  | 4 false | TF | BACH2  |
| 605 | 2.11828  | 0.000371 | 0.472081 | 0 | 5  | 4 false | TF | HSF1   |
| 606 | 2.129032 | 0.000341 | 0.469697 | 0 | 5  | 4 false | TF | SETD1A |
| 607 | 3.014337 | 0.000322 | 0.331748 | 0 | 9  | 4 false | TF | SNAI2  |
| 608 | 2.164875 | 0.000048 | 0.461921 | 0 | 2  | 4 false | TF | NCOR1  |
| 609 | 2.078853 | 0.000994 | 0.481034 | 0 | 10 | 4 false | TF | KLF1   |
| 610 | 2.107527 | 0.001037 | 0.47449  | 0 | 7  | 4 false | TF | SMC3   |
| 611 | 2.11828  | 0.000388 | 0.472081 | 0 | 6  | 4 false | TF | KLF5   |
| 612 | 3.250896 | 8.81E-06 | 0.307608 | 0 | 2  | 4 false | TF | NELFA  |
| 613 | 2.071685 | 0.00123  | 0.482699 | 0 | 11 | 4 false | TF | NFE2   |
| 614 | 2.096774 | 0.000962 | 0.476923 | 0 | 10 | 4 false | TF | TAL1   |
| 615 | 2.057348 | 0.001999 | 0.486063 | 0 | 14 | 4 false | TF | FLI1   |

|     |          |          |          |   |     |         |          |            |
|-----|----------|----------|----------|---|-----|---------|----------|------------|
| 616 | 2.143369 | 0.000139 | 0.466555 | 0 | 3   | 4 false | TF       | ELL2       |
| 617 | 2.125448 | 0.000463 | 0.470489 | 0 | 6   | 4 false | TF       | FOSL2      |
| 618 | 2.150538 | 0.000165 | 0.465    | 0 | 3   | 4 false | TF       | IKZF1      |
| 619 | 2.071685 | 0.002276 | 0.482699 | 0 | 13  | 4 false | TF       | TFAP2C     |
| 620 | 2.121864 | 0.000655 | 0.471284 | 0 | 7   | 4 false | TF       | TRIM25     |
| 621 | 2.089606 | 0.001344 | 0.478559 | 0 | 9   | 4 false | TF       | STAG1      |
| 622 | 2.0681   | 0.002309 | 0.483536 | 0 | 13  | 4 false | TF       | RAD21      |
| 623 | 2.057348 | 0.004905 | 0.486063 | 0 | 17  | 4 false | TF       | FOXA1      |
| 624 | 2.075269 | 0.00107  | 0.481865 | 0 | 11  | 4 false | TF       | KDM2B      |
| 625 | 2.02509  | 0.004109 | 0.493805 | 0 | 18  | 4 false | TF       | ESR1       |
| 626 | 2.129032 | 0.000273 | 0.469697 | 0 | 4   | 4 false | TF       | BRCA1      |
| 627 | 2.082437 | 0.001129 | 0.480207 | 0 | 11  | 4 false | TF       | LARP7      |
| 628 | 2.132616 | 0.001316 | 0.468908 | 0 | 7   | 4 false | TF       | HNF4A      |
| 629 | 3.444444 | 0        | 0.290323 | 0 | 1   | 4 false | TF       | TCF21      |
| 630 | 2.078853 | 0.001208 | 0.481034 | 0 | 10  | 4 false | TF       | GATA1      |
| 631 | 2.082437 | 0.001244 | 0.480207 | 0 | 11  | 4 false | TF       | TCF3       |
| 632 | 2.021505 | 0.003652 | 0.494681 | 0 | 20  | 4 false | TF       | MAX        |
| 633 | 2.129032 | 0.000423 | 0.469697 | 0 | 5   | 4 false | TF       | SUPT5H     |
| 634 | 2.089606 | 0.000983 | 0.478559 | 0 | 9   | 4 false | TF       | TFAP4      |
| 635 | 2.082437 | 0.001177 | 0.480207 | 0 | 11  | 4 false | TF       | ARNTL      |
| 636 | 2.11828  | 0.000372 | 0.472081 | 0 | 6   | 4 false | TF       | PML        |
| 637 | 2.086022 | 0.001074 | 0.479381 | 0 | 10  | 4 false | TF       | NRF1       |
| 638 | 2.09319  | 0.000969 | 0.47774  | 0 | 10  | 4 false | TF       | MED1       |
| 639 | 2.075269 | 0.001451 | 0.481865 | 0 | 10  | 4 false | TF       | NR3C1      |
| 640 | 2.057348 | 0.001707 | 0.486063 | 0 | 13  | 4 false | TF       | KDM5B      |
| 641 | 2.100358 | 0.000784 | 0.476109 | 0 | 8   | 4 false | TF       | TCF7L2     |
| 642 | 2.136201 | 0.000237 | 0.468121 | 0 | 4   | 4 false | TF       | RCOR1      |
| 643 | 2.043011 | 0.002819 | 0.489474 | 0 | 15  | 4 false | TF       | CTCF       |
| 644 | 2.111111 | 0.000497 | 0.473684 | 0 | 7   | 4 false | TF       | IRF1       |
| 645 | 2.096774 | 0.001641 | 0.476923 | 0 | 10  | 4 false | TF       | STAT3      |
| 646 | 2.103943 | 0.000654 | 0.475298 | 0 | 8   | 4 false | TF       | KMT2A      |
| 647 | 2.129032 | 0.000411 | 0.469697 | 0 | 5   | 4 false | TF       | PPARG      |
| 648 | 2.139785 | 0.000206 | 0.467337 | 0 | 4   | 4 false | TF       | ELK1       |
| 649 | 2.100358 | 0.00075  | 0.476109 | 0 | 8   | 4 false | TF       | MXI1       |
| 650 | 2.09319  | 0.0016   | 0.47774  | 0 | 10  | 4 false | TF       | CHD8       |
| 651 | 2.057348 | 0.00601  | 0.486063 | 0 | 11  | 4 false | TF       | REST       |
| 652 | 2.107527 | 0.000974 | 0.47449  | 0 | 8   | 4 false | TF       | MBD3       |
| 653 | 2.132616 | 0.000219 | 0.468908 | 0 | 4   | 4 false | TF       | CDK9       |
| 654 | 2.071685 | 0.001542 | 0.482699 | 0 | 13  | 4 false | TF       | RUNX1      |
| 655 | 2.050179 | 0.003885 | 0.487762 | 0 | 17  | 4 false | TF       | MAZ        |
| 656 | 2.129032 | 0.000282 | 0.469697 | 0 | 5   | 4 false | TF       | BCOR       |
| 657 | 2.446237 | 0.034676 | 0.408791 | 0 | 139 | 3 false | miRNA_do | hsa-miR-11 |
| 658 | 2.129032 | 0.000357 | 0.469697 | 0 | 5   | 4 false | TF       | SMAD1      |

| Neighborh | NumberOfI | NumberOfI | PartnerOfI | Radiality | selected | SelfLoops | shared nan | Stress | Topologica |
|-----------|-----------|-----------|------------|-----------|----------|-----------|------------|--------|------------|
| 11.6875   | 16        | 0         | 0          | 0.6819    | false    | 0         | hsa-miR-66 | 6770   | 0.395833   |
| 12.28571  | 7         | 0         | 0          | 0.672342  | false    | 0         | hsa-miR-54 | 1104   | 0.451429   |
| 13.5      | 8         | 0         | 0          | 0.677718  | false    | 0         | hsa-miR-48 | 11702  | 0.446429   |
| 7         | 2         | 0         | 0          | 0.655018  | false    | 0         | hsa-miR-47 | 96     | 0.545455   |
| 86        | 1         | 0         | 0          | 0.560932  | false    | 0         | BDP1       | 0      | 0          |
| 86        | 1         | 0         | 0          | 0.560932  | false    | 0         | TBL1Y      | 0      | 0          |
| 86        | 1         | 0         | 0          | 0.560932  | false    | 0         | MAF        | 0      | 0          |
| 8.104651  | 86        | 0         | 0          | 0.7273    | false    | 0         | hsa-miR-45 | 595150 | 0.229182   |
| 31        | 1         | 0         | 0          | 0.52509   | false    | 0         | ATF4       | 0      | 0          |
| 9.290323  | 31        | 0         | 0          | 0.691458  | false    | 0         | hsa-miR-45 | 95582  | 0.296083   |
| 79        | 1         | 0         | 0          | 0.554361  | false    | 0         | CDK12      | 0      | 0          |
| 8.43038   | 79        | 0         | 0          | 0.720729  | false    | 0         | hsa-miR-45 | 416530 | 0.25622    |
| 9.153846  | 13        | 0         | 0          | 0.67951   | false    | 0         | hsa-miR-44 | 19830  | 0.313609   |
| 62        | 1         | 0         | 0          | 0.543608  | false    | 0         | MEF2B      | 0      | 0          |
| 9.83871   | 62        | 0         | 0          | 0.709976  | false    | 0         | hsa-miR-44 | 339304 | 0.315668   |
| 38        | 1         | 0         | 0          | 0.530466  | false    | 0         | PRDM14     | 0      | 0          |
| 10        | 38        | 0         | 0          | 0.696834  | false    | 0         | hsa-miR-44 | 150460 | 0.321429   |
| 490       | 1         | 0         | 0          | 0.80227   | false    | 0         | HMBOX1     | 0      | 0          |
| 490       | 1         | 0         | 0          | 0.80227   | false    | 0         | GMEB2      | 0      | 0          |
| 490       | 1         | 0         | 0          | 0.80227   | false    | 0         | ARRB1      | 0      | 0          |
| 490       | 1         | 0         | 0          | 0.80227   | false    | 0         | PAX7       | 0      | 0          |
| 490       | 1         | 0         | 0          | 0.80227   | false    | 0         | INO80      | 0      | 0          |
| 490       | 1         | 0         | 0          | 0.80227   | false    | 0         | AHCTF1     | 0      | 0          |
| 490       | 1         | 0         | 0          | 0.80227   | false    | 0         | AGO2       | 0      | 0          |
| 490       | 1         | 0         | 0          | 0.80227   | false    | 0         | NR2C2      | 0      | 0          |
| 490       | 1         | 0         | 0          | 0.80227   | false    | 0         | NCAPG      | 0      | 0          |
| 490       | 1         | 0         | 0          | 0.80227   | false    | 0         | VEZF1      | 0      | 0          |
| 490       | 1         | 0         | 0          | 0.80227   | false    | 0         | SP4        | 0      | 0          |
| 490       | 1         | 0         | 0          | 0.80227   | false    | 0         | ORC2       | 0      | 0          |
| 490       | 1         | 0         | 0          | 0.80227   | false    | 0         | AGO1       | 0      | 0          |
| 490       | 1         | 0         | 0          | 0.80227   | false    | 0         | DR1        | 0      | 0          |
| 490       | 1         | 0         | 0          | 0.80227   | false    | 0         | ID3        | 0      | 0          |
| 490       | 1         | 0         | 0          | 0.80227   | false    | 0         | TCF7L1     | 0      | 0          |
| 490       | 1         | 0         | 0          | 0.80227   | false    | 0         | NKX3-1     | 0      | 0          |
| 490       | 1         | 0         | 0          | 0.80227   | false    | 0         | LIN9       | 0      | 0          |
| 490       | 1         | 0         | 0          | 0.80227   | false    | 0         | ARNT2      | 0      | 0          |
| 490       | 1         | 0         | 0          | 0.80227   | false    | 0         | FOXR2      | 0      | 0          |
| 490       | 1         | 0         | 0          | 0.80227   | false    | 0         | HJURP      | 0      | 0          |
| 490       | 1         | 0         | 0          | 0.80227   | false    | 0         | TOP1       | 0      | 0          |
| 490       | 1         | 0         | 0          | 0.80227   | false    | 0         | KAT5       | 0      | 0          |
| 490       | 1         | 0         | 0          | 0.80227   | false    | 0         | NR5A2      | 0      | 0          |
| 288       | 2         | 0         | 0          | 0.805854  | false    | 0         | BPTF       | 4364   | 0.580972   |
| 490       | 1         | 0         | 0          | 0.80227   | false    | 0         | SGF29      | 0      | 0          |
| 490       | 1         | 0         | 0          | 0.80227   | false    | 0         | HOXC9      | 0      | 0          |
| 284.5     | 2         | 0         | 0          | 0.805257  | false    | 0         | SOX2       | 3618   | 0.575051   |
| 490       | 1         | 0         | 0          | 0.80227   | false    | 0         | LDB1       | 0      | 0          |

|       |   |   |   |          |       |           |      |          |
|-------|---|---|---|----------|-------|-----------|------|----------|
| 490   | 1 | 0 | 0 | 0.80227  | false | 0 ATF1    | 0    | 0        |
| 490   | 1 | 0 | 0 | 0.80227  | false | 0 HHEX    | 0    | 0        |
| 490   | 1 | 0 | 0 | 0.80227  | false | 0 HDAC3   | 0    | 0        |
| 490   | 1 | 0 | 0 | 0.80227  | false | 0 XRCC4   | 0    | 0        |
| 490   | 1 | 0 | 0 | 0.80227  | false | 0 HOXB8   | 0    | 0        |
| 490   | 1 | 0 | 0 | 0.80227  | false | 0 CDK6    | 0    | 0        |
| 490   | 1 | 0 | 0 | 0.80227  | false | 0 ZNF84   | 0    | 0        |
| 490   | 1 | 0 | 0 | 0.80227  | false | 0 ZNF280D | 0    | 0        |
| 490   | 1 | 0 | 0 | 0.80227  | false | 0 OGT     | 0    | 0        |
| 490   | 1 | 0 | 0 | 0.80227  | false | 0 L3MBTL3 | 0    | 0        |
| 288   | 2 | 0 | 0 | 0.805854 | false | 0 TBL1XR1 | 4364 | 0.580972 |
| 490   | 1 | 0 | 0 | 0.80227  | false | 0 LEF1    | 0    | 0        |
| 490   | 1 | 0 | 0 | 0.80227  | false | 0 PCGF1   | 0    | 0        |
| 246   | 2 | 0 | 0 | 0.802867 | false | 0 LMO2    | 2808 | 0.501022 |
| 490   | 1 | 0 | 0 | 0.80227  | false | 0 NFAT5   | 0    | 0        |
| 490   | 1 | 0 | 0 | 0.80227  | false | 0 TRRAP   | 0    | 0        |
| 490   | 1 | 0 | 0 | 0.80227  | false | 0 E2F7    | 0    | 0        |
| 490   | 1 | 0 | 0 | 0.80227  | false | 0 FANCD2  | 0    | 0        |
| 284.5 | 2 | 0 | 0 | 0.805257 | false | 0 LYL1    | 3618 | 0.575051 |
| 490   | 1 | 0 | 0 | 0.80227  | false | 0 USP7    | 0    | 0        |
| 490   | 1 | 0 | 0 | 0.80227  | false | 0 ZNF395  | 0    | 0        |
| 490   | 1 | 0 | 0 | 0.80227  | false | 0 WRN     | 0    | 0        |
| 490   | 1 | 0 | 0 | 0.80227  | false | 0 EZH1    | 0    | 0        |
| 490   | 1 | 0 | 0 | 0.80227  | false | 0 ZKSCAN1 | 0    | 0        |
| 490   | 1 | 0 | 0 | 0.80227  | false | 0 HDAC6   | 0    | 0        |
| 490   | 1 | 0 | 0 | 0.80227  | false | 0 NPAT    | 0    | 0        |
| 490   | 1 | 0 | 0 | 0.80227  | false | 0 NSD2    | 0    | 0        |
| 490   | 1 | 0 | 0 | 0.80227  | false | 0 MAP2K1  | 0    | 0        |
| 490   | 1 | 0 | 0 | 0.80227  | false | 0 TERF1   | 0    | 0        |
| 490   | 1 | 0 | 0 | 0.80227  | false | 0 ZC3H8   | 0    | 0        |
| 490   | 1 | 0 | 0 | 0.80227  | false | 0 ELL     | 0    | 0        |
| 490   | 1 | 0 | 0 | 0.80227  | false | 0 ASH1L   | 0    | 0        |
| 490   | 1 | 0 | 0 | 0.80227  | false | 0 EHF     | 0    | 0        |
| 490   | 1 | 0 | 0 | 0.80227  | false | 0 HEYL    | 0    | 0        |
| 288   | 2 | 0 | 0 | 0.805854 | false | 0 CUX1    | 4364 | 0.580972 |
| 490   | 1 | 0 | 0 | 0.80227  | false | 0 MED12   | 0    | 0        |
| 490   | 1 | 0 | 0 | 0.80227  | false | 0 SPDEF   | 0    | 0        |
| 490   | 1 | 0 | 0 | 0.80227  | false | 0 ARID3A  | 0    | 0        |
| 490   | 1 | 0 | 0 | 0.80227  | false | 0 DDX5    | 0    | 0        |
| 490   | 1 | 0 | 0 | 0.80227  | false | 0 SMN1    | 0    | 0        |
| 490   | 1 | 0 | 0 | 0.80227  | false | 0 ICE2    | 0    | 0        |
| 490   | 1 | 0 | 0 | 0.80227  | false | 0 OVOL2   | 0    | 0        |
| 490   | 1 | 0 | 0 | 0.80227  | false | 0 SMARCC2 | 0    | 0        |
| 490   | 1 | 0 | 0 | 0.80227  | false | 0 SUPT20H | 0    | 0        |
| 490   | 1 | 0 | 0 | 0.80227  | false | 0 TFAM    | 0    | 0        |
| 490   | 1 | 0 | 0 | 0.80227  | false | 0 GLYR1   | 0    | 0        |
| 490   | 1 | 0 | 0 | 0.80227  | false | 0 INTS13  | 0    | 0        |

|          |   |   |   |          |       |            |      |          |
|----------|---|---|---|----------|-------|------------|------|----------|
| 490      | 1 | 0 | 0 | 0.80227  | false | 0 SAG      | 0    | 0        |
| 490      | 1 | 0 | 0 | 0.80227  | false | 0 TAF2     | 0    | 0        |
| 490      | 1 | 0 | 0 | 0.80227  | false | 0 BANP     | 0    | 0        |
| 490      | 1 | 0 | 0 | 0.80227  | false | 0 SNAPC4   | 0    | 0        |
| 490      | 1 | 0 | 0 | 0.80227  | false | 0 MLLT3    | 0    | 0        |
| 490      | 1 | 0 | 0 | 0.80227  | false | 0 FOXK1    | 0    | 0        |
| 490      | 1 | 0 | 0 | 0.80227  | false | 0 MAPK1    | 0    | 0        |
| 490      | 1 | 0 | 0 | 0.80227  | false | 0 SCML2    | 0    | 0        |
| 490      | 1 | 0 | 0 | 0.80227  | false | 0 NCOA4    | 0    | 0        |
| 490      | 1 | 0 | 0 | 0.80227  | false | 0 GLI2     | 0    | 0        |
| 490      | 1 | 0 | 0 | 0.80227  | false | 0 THAP11   | 0    | 0        |
| 490      | 1 | 0 | 0 | 0.80227  | false | 0 F2RL1    | 0    | 0        |
| 490      | 1 | 0 | 0 | 0.80227  | false | 0 PDX1     | 0    | 0        |
| 490      | 1 | 0 | 0 | 0.80227  | false | 0 SNAPC1   | 0    | 0        |
| 490      | 1 | 0 | 0 | 0.80227  | false | 0 KAT2B    | 0    | 0        |
| 490      | 1 | 0 | 0 | 0.80227  | false | 0 E2F8     | 0    | 0        |
| 490      | 1 | 0 | 0 | 0.80227  | false | 0 CBX2     | 0    | 0        |
| 490      | 1 | 0 | 0 | 0.80227  | false | 0 T        | 0    | 0        |
| 490      | 1 | 0 | 0 | 0.80227  | false | 0 NR2E3    | 0    | 0        |
| 490      | 1 | 0 | 0 | 0.80227  | false | 0 RB1      | 0    | 0        |
| 490      | 1 | 0 | 0 | 0.80227  | false | 0 IRF3     | 0    | 0        |
| 490      | 1 | 0 | 0 | 0.80227  | false | 0 RELB     | 0    | 0        |
| 490      | 1 | 0 | 0 | 0.80227  | false | 0 FXR1     | 0    | 0        |
| 490      | 1 | 0 | 0 | 0.80227  | false | 0 CDK2     | 0    | 0        |
| 276      | 2 | 0 | 0 | 0.805257 | false | 0 SIX2     | 3732 | 0.557809 |
| 218.3333 | 3 | 0 | 0 | 0.808841 | false | 0 BCLAF1   | 8780 | 0.436412 |
| 490      | 1 | 0 | 0 | 0.80227  | false | 0 CBX8     | 0    | 0        |
| 490      | 1 | 0 | 0 | 0.80227  | false | 0 GREB1    | 0    | 0        |
| 490      | 1 | 0 | 0 | 0.80227  | false | 0 KDM3A    | 0    | 0        |
| 490      | 1 | 0 | 0 | 0.80227  | false | 0 E2F2     | 0    | 0        |
| 490      | 1 | 0 | 0 | 0.80227  | false | 0 CTBP1    | 0    | 0        |
| 490      | 1 | 0 | 0 | 0.80227  | false | 0 JMJD1C   | 0    | 0        |
| 490      | 1 | 0 | 0 | 0.80227  | false | 0 XRN2     | 0    | 0        |
| 490      | 1 | 0 | 0 | 0.80227  | false | 0 PPARGC1A | 0    | 0        |
| 490      | 1 | 0 | 0 | 0.80227  | false | 0 BMI1     | 0    | 0        |
| 490      | 1 | 0 | 0 | 0.80227  | false | 0 HECTD1   | 0    | 0        |
| 276      | 2 | 0 | 0 | 0.805257 | false | 0 KDM3B    | 3732 | 0.557809 |
| 490      | 1 | 0 | 0 | 0.80227  | false | 0 MEF2C    | 0    | 0        |
| 490      | 1 | 0 | 0 | 0.80227  | false | 0 KDM6B    | 0    | 0        |
| 490      | 1 | 0 | 0 | 0.80227  | false | 0 BRD7     | 0    | 0        |
| 490      | 1 | 0 | 0 | 0.80227  | false | 0 CASP8AP2 | 0    | 0        |
| 490      | 1 | 0 | 0 | 0.80227  | false | 0 BCL11A   | 0    | 0        |
| 490      | 1 | 0 | 0 | 0.80227  | false | 0 CIITA    | 0    | 0        |
| 490      | 1 | 0 | 0 | 0.80227  | false | 0 MAFB     | 0    | 0        |
| 490      | 1 | 0 | 0 | 0.80227  | false | 0 FUS      | 0    | 0        |
| 490      | 1 | 0 | 0 | 0.80227  | false | 0 MORC2    | 0    | 0        |
| 490      | 1 | 0 | 0 | 0.80227  | false | 0 HNRNPL   | 0    | 0        |

|     |   |   |   |          |       |            |      |          |
|-----|---|---|---|----------|-------|------------|------|----------|
| 490 | 1 | 0 | 0 | 0.80227  | false | 0 MBD4     | 0    | 0        |
| 490 | 1 | 0 | 0 | 0.80227  | false | 0 TERF2    | 0    | 0        |
| 490 | 1 | 0 | 0 | 0.80227  | false | 0 CHD4     | 0    | 0        |
| 490 | 1 | 0 | 0 | 0.80227  | false | 0 CHD3     | 0    | 0        |
| 490 | 1 | 0 | 0 | 0.80227  | false | 0 ID2      | 0    | 0        |
| 490 | 1 | 0 | 0 | 0.80227  | false | 0 ZC3H11A  | 0    | 0        |
| 490 | 1 | 0 | 0 | 0.80227  | false | 0 KDM5D    | 0    | 0        |
| 490 | 1 | 0 | 0 | 0.80227  | false | 0 PBX2     | 0    | 0        |
| 490 | 1 | 0 | 0 | 0.80227  | false | 0 CCNT1    | 0    | 0        |
| 490 | 1 | 0 | 0 | 0.80227  | false | 0 MXD3     | 0    | 0        |
| 288 | 2 | 0 | 0 | 0.805854 | false | 0 RBL1     | 4364 | 0.580972 |
| 288 | 2 | 0 | 0 | 0.805854 | false | 0 SUZ12    | 4364 | 0.580972 |
| 288 | 2 | 0 | 0 | 0.805854 | false | 0 BRF1     | 4364 | 0.580972 |
| 490 | 1 | 0 | 0 | 0.80227  | false | 0 BACH1    | 0    | 0        |
| 288 | 2 | 0 | 0 | 0.805854 | false | 0 SREBF2   | 4364 | 0.580972 |
| 490 | 1 | 0 | 0 | 0.80227  | false | 0 SIRT6    | 0    | 0        |
| 490 | 1 | 0 | 0 | 0.80227  | false | 0 NCAPG2   | 0    | 0        |
| 490 | 1 | 0 | 0 | 0.80227  | false | 0 BARX1    | 0    | 0        |
| 490 | 1 | 0 | 0 | 0.80227  | false | 0 CTBP2    | 0    | 0        |
| 490 | 1 | 0 | 0 | 0.80227  | false | 0 PRKCQ    | 0    | 0        |
| 490 | 1 | 0 | 0 | 0.80227  | false | 0 EPCAM    | 0    | 0        |
| 490 | 1 | 0 | 0 | 0.80227  | false | 0 NR1D1    | 0    | 0        |
| 490 | 1 | 0 | 0 | 0.80227  | false | 0 ZNF12    | 0    | 0        |
| 490 | 1 | 0 | 0 | 0.80227  | false | 0 STAT2    | 0    | 0        |
| 490 | 1 | 0 | 0 | 0.80227  | false | 0 SMARCA4  | 0    | 0        |
| 490 | 1 | 0 | 0 | 0.80227  | false | 0 NFYC     | 0    | 0        |
| 276 | 2 | 0 | 0 | 0.805257 | false | 0 MEF2A    | 3732 | 0.557809 |
| 490 | 1 | 0 | 0 | 0.80227  | false | 0 EED      | 0    | 0        |
| 288 | 2 | 0 | 0 | 0.805854 | false | 0 PIAS1    | 4364 | 0.580972 |
| 490 | 1 | 0 | 0 | 0.80227  | false | 0 JAZF1    | 0    | 0        |
| 490 | 1 | 0 | 0 | 0.80227  | false | 0 HSF2     | 0    | 0        |
| 490 | 1 | 0 | 0 | 0.80227  | false | 0 LMNB1    | 0    | 0        |
| 490 | 1 | 0 | 0 | 0.80227  | false | 0 BRF2     | 0    | 0        |
| 490 | 1 | 0 | 0 | 0.80227  | false | 0 PALB2    | 0    | 0        |
| 490 | 1 | 0 | 0 | 0.80227  | false | 0 NCOA3    | 0    | 0        |
| 490 | 1 | 0 | 0 | 0.80227  | false | 0 ZNF217   | 0    | 0        |
| 490 | 1 | 0 | 0 | 0.80227  | false | 0 HOXB4    | 0    | 0        |
| 490 | 1 | 0 | 0 | 0.80227  | false | 0 AML1-ETO | 0    | 0        |
| 490 | 1 | 0 | 0 | 0.80227  | false | 0 WRNIP1   | 0    | 0        |
| 490 | 1 | 0 | 0 | 0.80227  | false | 0 HNF1A    | 0    | 0        |
| 490 | 1 | 0 | 0 | 0.80227  | false | 0 KDM6A    | 0    | 0        |
| 490 | 1 | 0 | 0 | 0.80227  | false | 0 GFI1B    | 0    | 0        |
| 490 | 1 | 0 | 0 | 0.80227  | false | 0 ELF2     | 0    | 0        |
| 490 | 1 | 0 | 0 | 0.80227  | false | 0 SMARCC1  | 0    | 0        |
| 490 | 1 | 0 | 0 | 0.80227  | false | 0 DNMT3B   | 0    | 0        |
| 490 | 1 | 0 | 0 | 0.80227  | false | 0 FOXP2    | 0    | 0        |
| 490 | 1 | 0 | 0 | 0.80227  | false | 0 ZBTB16   | 0    | 0        |



|       |   |   |   |          |       |   |          |      |          |
|-------|---|---|---|----------|-------|---|----------|------|----------|
| 490   | 1 | 0 | 0 | 0.80227  | false | 0 | SVIL     | 0    | 0        |
| 490   | 1 | 0 | 0 | 0.80227  | false | 0 | SAP30    | 0    | 0        |
| 490   | 1 | 0 | 0 | 0.80227  | false | 0 | ZNF274   | 0    | 0        |
| 490   | 1 | 0 | 0 | 0.80227  | false | 0 | ELK4     | 0    | 0        |
| 490   | 1 | 0 | 0 | 0.80227  | false | 0 | RXRA     | 0    | 0        |
| 490   | 1 | 0 | 0 | 0.80227  | false | 0 | CBX6     | 0    | 0        |
| 490   | 1 | 0 | 0 | 0.80227  | false | 0 | NR4A1    | 0    | 0        |
| 288   | 2 | 0 | 0 | 0.805854 | false | 0 | RBPJ     | 4364 | 0.580972 |
| 490   | 1 | 0 | 0 | 0.80227  | false | 0 | HDAC8    | 0    | 0        |
| 284.5 | 2 | 0 | 0 | 0.805257 | false | 0 | SIX5     | 3618 | 0.575051 |
| 490   | 1 | 0 | 0 | 0.80227  | false | 0 | PRKDC    | 0    | 0        |
| 490   | 1 | 0 | 0 | 0.80227  | false | 0 | PRAME    | 0    | 0        |
| 490   | 1 | 0 | 0 | 0.80227  | false | 0 | CHD7     | 0    | 0        |
| 490   | 1 | 0 | 0 | 0.80227  | false | 0 | NUP98    | 0    | 0        |
| 284.5 | 2 | 0 | 0 | 0.805257 | false | 0 | RUNX2    | 3618 | 0.575051 |
| 490   | 1 | 0 | 0 | 0.80227  | false | 0 | DMC1     | 0    | 0        |
| 490   | 1 | 0 | 0 | 0.80227  | false | 0 | KLF15    | 0    | 0        |
| 288   | 2 | 0 | 0 | 0.805854 | false | 0 | NCOA1    | 4364 | 0.580972 |
| 490   | 1 | 0 | 0 | 0.80227  | false | 0 | GRHL3    | 0    | 0        |
| 490   | 1 | 0 | 0 | 0.80227  | false | 0 | RYBP     | 0    | 0        |
| 490   | 1 | 0 | 0 | 0.80227  | false | 0 | ID1      | 0    | 0        |
| 490   | 1 | 0 | 0 | 0.80227  | false | 0 | HAND1    | 0    | 0        |
| 490   | 1 | 0 | 0 | 0.80227  | false | 0 | CDKN1B   | 0    | 0        |
| 490   | 1 | 0 | 0 | 0.80227  | false | 0 | C17orf49 | 0    | 0        |
| 490   | 1 | 0 | 0 | 0.80227  | false | 0 | IRF2     | 0    | 0        |
| 490   | 1 | 0 | 0 | 0.80227  | false | 0 | TET3     | 0    | 0        |
| 490   | 1 | 0 | 0 | 0.80227  | false | 0 | HOXD11   | 0    | 0        |
| 490   | 1 | 0 | 0 | 0.80227  | false | 0 | HOXC11   | 0    | 0        |
| 490   | 1 | 0 | 0 | 0.80227  | false | 0 | TEAD1    | 0    | 0        |
| 490   | 1 | 0 | 0 | 0.80227  | false | 0 | DOT1L    | 0    | 0        |
| 490   | 1 | 0 | 0 | 0.80227  | false | 0 | HOXA13   | 0    | 0        |
| 490   | 1 | 0 | 0 | 0.80227  | false | 0 | LRWD1    | 0    | 0        |
| 490   | 1 | 0 | 0 | 0.80227  | false | 0 | SMAD5    | 0    | 0        |
| 490   | 1 | 0 | 0 | 0.80227  | false | 0 | SMARCA2  | 0    | 0        |
| 490   | 1 | 0 | 0 | 0.80227  | false | 0 | FOXH1    | 0    | 0        |
| 490   | 1 | 0 | 0 | 0.80227  | false | 0 | ZNF581   | 0    | 0        |
| 490   | 1 | 0 | 0 | 0.80227  | false | 0 | SMAD2    | 0    | 0        |
| 288   | 2 | 0 | 0 | 0.805854 | false | 0 | WWTR1    | 4364 | 0.580972 |
| 490   | 1 | 0 | 0 | 0.80227  | false | 0 | CTNNB1   | 0    | 0        |
| 490   | 1 | 0 | 0 | 0.80227  | false | 0 | MTA3     | 0    | 0        |
| 490   | 1 | 0 | 0 | 0.80227  | false | 0 | SIX1     | 0    | 0        |
| 490   | 1 | 0 | 0 | 0.80227  | false | 0 | CEBPZ    | 0    | 0        |
| 490   | 1 | 0 | 0 | 0.80227  | false | 0 | NCOR2    | 0    | 0        |
| 490   | 1 | 0 | 0 | 0.80227  | false | 0 | HNF1B    | 0    | 0        |
| 490   | 1 | 0 | 0 | 0.80227  | false | 0 | HES4     | 0    | 0        |
| 490   | 1 | 0 | 0 | 0.80227  | false | 0 | BRD9     | 0    | 0        |
| 490   | 1 | 0 | 0 | 0.80227  | false | 0 | GRHL1    | 0    | 0        |

|          |     |   |   |          |       |              |         |          |
|----------|-----|---|---|----------|-------|--------------|---------|----------|
| 490      | 1   | 0 | 0 | 0.80227  | false | 0 ZFHX4      | 0       | 0        |
| 490      | 1   | 0 | 0 | 0.80227  | false | 0 ATF7       | 0       | 0        |
| 490      | 1   | 0 | 0 | 0.80227  | false | 0 NFKB2      | 0       | 0        |
| 490      | 1   | 0 | 0 | 0.80227  | false | 0 AFF1       | 0       | 0        |
| 490      | 1   | 0 | 0 | 0.80227  | false | 0 ESRR       | 0       | 0        |
| 490      | 1   | 0 | 0 | 0.80227  | false | 0 RFX2       | 0       | 0        |
| 288      | 2   | 0 | 0 | 0.805854 | false | 0 HIRA       | 4364    | 0.580972 |
| 490      | 1   | 0 | 0 | 0.80227  | false | 0 CBX7       | 0       | 0        |
| 251.5    | 2   | 0 | 0 | 0.803465 | false | 0 TET2       | 1828    | 0.511224 |
| 260.5    | 2   | 0 | 0 | 0.804062 | false | 0 ASCL1      | 2440    | 0.528513 |
| 490      | 1   | 0 | 0 | 0.80227  | false | 0 HOXA5      | 0       | 0        |
| 490      | 1   | 0 | 0 | 0.80227  | false | 0 SETDB1     | 0       | 0        |
| 288      | 2   | 0 | 0 | 0.805854 | false | 0 MYBL2      | 4364    | 0.580972 |
| 490      | 1   | 0 | 0 | 0.80227  | false | 0 HDAC4      | 0       | 0        |
| 490      | 1   | 0 | 0 | 0.80227  | false | 0 SETX       | 0       | 0        |
| 490      | 1   | 0 | 0 | 0.80227  | false | 0 KAT2A      | 0       | 0        |
| 490      | 1   | 0 | 0 | 0.80227  | false | 0 LMO3       | 0       | 0        |
| 490      | 1   | 0 | 0 | 0.80227  | false | 0 ETV5       | 0       | 0        |
| 490      | 1   | 0 | 0 | 0.80227  | false | 0 NEUROD1    | 0       | 0        |
| 490      | 1   | 0 | 0 | 0.80227  | false | 0 HOXA11     | 0       | 0        |
| 490      | 1   | 0 | 0 | 0.80227  | false | 0 SMARCE1    | 0       | 0        |
| 490      | 1   | 0 | 0 | 0.80227  | false | 0 ATF6       | 0       | 0        |
| 490      | 1   | 0 | 0 | 0.80227  | false | 0 HOXC8      | 0       | 0        |
| 490      | 1   | 0 | 0 | 0.80227  | false | 0 RNF2       | 0       | 0        |
| 490      | 1   | 0 | 0 | 0.80227  | false | 0 SMARCA1    | 0       | 0        |
| 490      | 1   | 0 | 0 | 0.80227  | false | 0 KMT2C      | 0       | 0        |
| 490      | 1   | 0 | 0 | 0.80227  | false | 0 HOXC13     | 0       | 0        |
| 490      | 1   | 0 | 0 | 0.80227  | false | 0 POU2AF1    | 0       | 0        |
| 490      | 1   | 0 | 0 | 0.80227  | false | 0 EHMT2      | 0       | 0        |
| 490      | 1   | 0 | 0 | 0.80227  | false | 0 POU2F1     | 0       | 0        |
| 490      | 1   | 0 | 0 | 0.80227  | false | 0 KDM5A      | 0       | 0        |
| 490      | 1   | 0 | 0 | 0.80227  | false | 0 CAMTA1     | 0       | 0        |
| 490      | 1   | 0 | 0 | 0.80227  | false | 0 MDM2       | 0       | 0        |
| 490      | 1   | 0 | 0 | 0.80227  | false | 0 MRE11      | 0       | 0        |
| 3.512245 | 490 | 0 | 0 | 0.968638 | false | 0 hsa-miR-44 | 4391514 | 0.08104  |
| 490      | 1   | 0 | 0 | 0.80227  | false | 0 MBD2       | 0       | 0        |
| 266      | 2   | 0 | 0 | 0.804062 | false | 0 JMJD6      | 2612    | 0.539715 |
| 42       | 1   | 0 | 0 | 0.531661 | false | 0 TLX1       | 0       | 0        |
| 10.19048 | 42  | 0 | 0 | 0.698029 | false | 0 hsa-miR-43 | 165114  | 0.328231 |
| 266      | 2   | 0 | 0 | 0.804062 | false | 0 ZNF750     | 2612    | 0.539715 |
| 41       | 1   | 0 | 0 | 0.531063 | false | 0 APOBEC3B   | 0       | 0        |
| 265.5    | 2   | 0 | 0 | 0.803465 | false | 0 JUNB       | 1832    | 0.539796 |
| 10.4878  | 41  | 0 | 0 | 0.697431 | false | 0 hsa-miR-42 | 113926  | 0.33885  |
| 26       | 1   | 0 | 0 | 0.5227   | false | 0 TGFB1      | 0       | 0        |
| 10.65385 | 26  | 0 | 0 | 0.689068 | false | 0 hsa-miR-42 | 98384   | 0.332891 |
| 274.5    | 2   | 0 | 0 | 0.804062 | false | 0 KDM4A      | 1958    | 0.557026 |
| 274.5    | 2   | 0 | 0 | 0.804062 | false | 0 LMNA       | 1958    | 0.557026 |

|          |    |   |   |          |       |   |            |        |          |
|----------|----|---|---|----------|-------|---|------------|--------|----------|
| 274.5    | 2  | 0 | 0 | 0.804062 | false | 0 | TLE3       | 1958   | 0.557026 |
| 9.254237 | 59 | 0 | 0 | 0.709379 | false | 0 | hsa-miR-37 | 143008 | 0.275141 |
| 20       | 1  | 0 | 0 | 0.518519 | false | 0 | IL6        | 0      | 0        |
| 20       | 1  | 0 | 0 | 0.518519 | false | 0 | LIN28A     | 0      | 0        |
| 255      | 2  | 0 | 0 | 0.80466  | false | 0 | HOXB13     | 3688   | 0.51626  |
| 11.4     | 20 | 0 | 0 | 0.684887 | false | 0 | hsa-miR-37 | 107986 | 0.371429 |
| 217.3333 | 3  | 0 | 0 | 0.808244 | false | 0 | CREBBP     | 8704   | 0.435278 |
| 286.5    | 2  | 0 | 0 | 0.806452 | false | 0 | FOXP1      | 4642   | 0.576768 |
| 210.6667 | 3  | 0 | 0 | 0.807049 | false | 0 | MYH11      | 6796   | 0.423569 |
| 286.5    | 2  | 0 | 0 | 0.806452 | false | 0 | HDAC1      | 4642   | 0.576768 |
| 83       | 1  | 0 | 0 | 0.558542 | false | 0 | ZFX        | 0      | 0        |
| 9.180723 | 83 | 0 | 0 | 0.72491  | false | 0 | hsa-miR-36 | 520688 | 0.272691 |
| 286      | 2  | 0 | 0 | 0.804062 | false | 0 | HDAC2      | 2232   | 0.580448 |
| 203.3333 | 3  | 0 | 0 | 0.805854 | false | 0 | RUNX1T1    | 5562   | 0.410412 |
| 203.3333 | 3  | 0 | 0 | 0.805854 | false | 0 | PRDM5      | 5562   | 0.410412 |
| 286      | 2  | 0 | 0 | 0.804062 | false | 0 | GATA4      | 2232   | 0.580448 |
| 201      | 3  | 0 | 0 | 0.805854 | false | 0 | AHR        | 5010   | 0.40568  |
| 217      | 3  | 0 | 0 | 0.806452 | false | 0 | GRHL2      | 6298   | 0.437247 |
| 286      | 2  | 0 | 0 | 0.804062 | false | 0 | NANOG      | 2232   | 0.580448 |
| 286      | 2  | 0 | 0 | 0.804062 | false | 0 | ZMYND8     | 2232   | 0.580448 |
| 286      | 2  | 0 | 0 | 0.804062 | false | 0 | BRD2       | 2232   | 0.580448 |
| 121      | 6  | 0 | 0 | 0.810036 | false | 0 | GATA2      | 14266  | 0.241449 |
| 9.47561  | 82 | 0 | 0 | 0.723118 | false | 0 | hsa-miR-32 | 331926 | 0.28252  |
| 278.5    | 2  | 0 | 0 | 0.804062 | false | 0 | SMAD4      | 2382   | 0.565173 |
| 278.5    | 2  | 0 | 0 | 0.804062 | false | 0 | MITF       | 2382   | 0.565173 |
| 213.3333 | 3  | 0 | 0 | 0.807646 | false | 0 | VDR        | 7532   | 0.428091 |
| 278.5    | 2  | 0 | 0 | 0.804062 | false | 0 | PRDM1      | 2382   | 0.565173 |
| 67       | 1  | 0 | 0 | 0.546595 | false | 0 | NKX2-1     | 0      | 0        |
| 278.5    | 2  | 0 | 0 | 0.804062 | false | 0 | DAXX       | 2382   | 0.565173 |
| 164.75   | 4  | 0 | 0 | 0.808244 | false | 0 | DNMT3A     | 8710   | 0.330141 |
| 278.5    | 2  | 0 | 0 | 0.804062 | false | 0 | ESR2       | 2382   | 0.565173 |
| 8.835821 | 67 | 0 | 0 | 0.712963 | false | 0 | hsa-miR-31 | 257712 | 0.279851 |
| 199.3333 | 3  | 0 | 0 | 0.805257 | false | 0 | SMAD3      | 4400   | 0.403117 |
| 167.25   | 4  | 0 | 0 | 0.809438 | false | 0 | KDM4C      | 12454  | 0.333835 |
| 49.5     | 2  | 0 | 0 | 0.562724 | false | 0 | HAND2      | 312    | 0.538889 |
| 9.352941 | 17 | 0 | 0 | 0.677718 | false | 0 | hsa-miR-31 | 47616  | 0.348039 |
| 250.5    | 2  | 0 | 0 | 0.802867 | false | 0 | JARID2     | 1028   | 0.510225 |
| 133.6    | 5  | 0 | 0 | 0.809438 | false | 0 | EZH2       | 11642  | 0.266801 |
| 11.63636 | 11 | 0 | 0 | 0.675926 | false | 0 | hsa-miR-31 | 3122   | 0.393939 |
| 154.6    | 5  | 0 | 0 | 0.810633 | false | 0 | ZNF384     | 14034  | 0.307816 |
| 290.5    | 2  | 0 | 0 | 0.805257 | false | 0 | ZEB1       | 3332   | 0.587221 |
| 290.5    | 2  | 0 | 0 | 0.805257 | false | 0 | BATF       | 3332   | 0.587221 |
| 166      | 4  | 0 | 0 | 0.807049 | false | 0 | BCL3       | 7436   | 0.334008 |
| 290.5    | 2  | 0 | 0 | 0.805257 | false | 0 | NFE2L2     | 3332   | 0.587221 |
| 130.6667 | 6  | 0 | 0 | 0.811231 | false | 0 | USF1       | 15090  | 0.259853 |
| 172.25   | 4  | 0 | 0 | 0.807646 | false | 0 | USF2       | 8444   | 0.34596  |
| 66.5     | 2  | 0 | 0 | 0.574074 | false | 0 | PRDM11     | 336    | 0.595455 |

|          |    |   |   |          |       |   |             |        |          |
|----------|----|---|---|----------|-------|---|-------------|--------|----------|
| 8.692308 | 91 | 0 | 0 | 0.727897 | false | 0 | hsa-miR-31  | 446132 | 0.265252 |
| 12       | 1  | 0 | 0 | 0.510753 | false | 0 | ZBTB48      | 0      | 0        |
| 10.66667 | 12 | 0 | 0 | 0.677121 | false | 0 | hsa-miR-31  | 29826  | 0.345238 |
| 287.5    | 2  | 0 | 0 | 0.805854 | false | 0 | SOX9        | 3984   | 0.57996  |
| 287.5    | 2  | 0 | 0 | 0.805854 | false | 0 | NIPBL       | 3984   | 0.57996  |
| 222      | 3  | 0 | 0 | 0.807049 | false | 0 | HMG3        | 7608   | 0.446465 |
| 85       | 1  | 0 | 0 | 0.55914  | false | 0 | VHL         | 0      | 0        |
| 218      | 3  | 0 | 0 | 0.808244 | false | 0 | THAP1       | 8086   | 0.43662  |
| 133.1429 | 7  | 0 | 0 | 0.811828 | false | 0 | CBFB        | 23772  | 0.264815 |
| 214      | 3  | 0 | 0 | 0.807049 | false | 0 | EPAS1       | 6802   | 0.430303 |
| 222      | 3  | 0 | 0 | 0.807049 | false | 0 | CCNT2       | 7608   | 0.446465 |
| 77.6     | 5  | 0 | 0 | 0.61828  | false | 0 | NR2F1       | 4024   | 0.430337 |
| 287.5    | 2  | 0 | 0 | 0.805854 | false | 0 | ARNT        | 3984   | 0.57996  |
| 287.5    | 2  | 0 | 0 | 0.805854 | false | 0 | NR1H2       | 3984   | 0.57996  |
| 107.625  | 8  | 0 | 0 | 0.813023 | false | 0 | NR2F2       | 25644  | 0.21325  |
| 8.835294 | 85 | 0 | 0 | 0.725508 | false | 0 | hsa-miR-21  | 473676 | 0.270183 |
| 145.3333 | 6  | 0 | 0 | 0.811231 | false | 0 | ZBTB7A      | 19632  | 0.289245 |
| 255.5    | 2  | 0 | 0 | 0.803465 | false | 0 | MECP2       | 1758   | 0.519388 |
| 255.5    | 2  | 0 | 0 | 0.803465 | false | 0 | DNMT1       | 1758   | 0.519388 |
| 11.80952 | 21 | 0 | 0 | 0.685484 | false | 0 | hsa-miR-18  | 39400  | 0.386054 |
| 6        | 2  | 0 | 0 | 0.647252 | false | 0 | hsa-miR-14  | 12     | 0.833333 |
| 189      | 3  | 0 | 0 | 0.805257 | false | 0 | KLF4        | 4420   | 0.382114 |
| 186.3333 | 3  | 0 | 0 | 0.805257 | false | 0 | CEBPA       | 3968   | 0.376694 |
| 10.9     | 10 | 0 | 0 | 0.678315 | false | 0 | hsa-miR-13  | 14264  | 0.366667 |
| 21.25    | 8  | 0 | 0 | 0.574671 | false | 0 | GTF2I       | 5954   | 0.200495 |
| 10       | 1  | 0 | 0 | 0.51135  | false | 0 | APEX1       | 0      | 0        |
| 10       | 1  | 0 | 0 | 0.51135  | false | 0 | OGG1        | 0      | 0        |
| 6.4      | 10 | 0 | 0 | 0.677718 | false | 0 | hsa-miR-13  | 68464  | 0.216    |
| 8        | 2  | 0 | 0 | 0.513142 | false | 0 | TNFSF12     | 468    | 0.636364 |
| 8        | 2  | 0 | 0 | 0.513142 | false | 0 | calcineurin | 468    | 0.636364 |
| 6        | 1  | 0 | 0 | 0.489247 | false | 0 | MRF4        | 0      | 0        |
| 6        | 1  | 0 | 0 | 0.489247 | false | 0 | MYF5        | 0      | 0        |
| 2.666667 | 6  | 0 | 0 | 0.655615 | false | 0 | hsa-miR-13  | 39620  | 0.238095 |
| 8        | 2  | 0 | 0 | 0.513142 | false | 0 | MYOG        | 468    | 0.636364 |
| 80.76923 | 13 | 0 | 0 | 0.821386 | false | 0 | CEBPD       | 54308  | 0.156718 |
| 175.5    | 4  | 0 | 0 | 0.808841 | false | 0 | SFPQ        | 9158   | 0.351107 |
| 239.3333 | 3  | 0 | 0 | 0.809438 | false | 0 | PAF1        | 9476   | 0.477622 |
| 77.66667 | 3  | 0 | 0 | 0.60454  | false | 0 | TAF3        | 1386   | 0.479167 |
| 221.6667 | 3  | 0 | 0 | 0.808841 | false | 0 | UBTF        | 9040   | 0.443106 |
| 137      | 1  | 0 | 0 | 0.589008 | false | 0 | ERCC3       | 0      | 0        |
| 237.6667 | 3  | 0 | 0 | 0.810036 | false | 0 | ZBTB33      | 10896  | 0.473333 |
| 236.6667 | 3  | 0 | 0 | 0.810036 | false | 0 | IRF4        | 10766  | 0.471333 |
| 237.3333 | 3  | 0 | 0 | 0.809438 | false | 0 | POU2F2      | 10106  | 0.473614 |
| 235.3333 | 3  | 0 | 0 | 0.808841 | false | 0 | GATAD1      | 9546   | 0.470549 |
| 236.3333 | 3  | 0 | 0 | 0.808244 | false | 0 | GATA6       | 8268   | 0.473508 |
| 313.5    | 2  | 0 | 0 | 0.807049 | false | 0 | RING1       | 5346   | 0.63004  |
| 237.6667 | 3  | 0 | 0 | 0.810036 | false | 0 | ASXL1       | 10896  | 0.473333 |

|          |     |   |   |          |       |   |            |         |          |
|----------|-----|---|---|----------|-------|---|------------|---------|----------|
| 313.5    | 2   | 0 | 0 | 0.807049 | false | 0 | ZBTB17     | 5346    | 0.63004  |
| 313.5    | 2   | 0 | 0 | 0.807049 | false | 0 | KAT7       | 5346    | 0.63004  |
| 313.5    | 2   | 0 | 0 | 0.807049 | false | 0 | GTF2B      | 5346    | 0.63004  |
| 193      | 4   | 0 | 0 | 0.810633 | false | 0 | KDM1A      | 13648   | 0.384    |
| 221.6667 | 3   | 0 | 0 | 0.808841 | false | 0 | OTX2       | 9040    | 0.443106 |
| 84       | 6   | 0 | 0 | 0.63859  | false | 0 | TRIM24     | 7444    | 0.395238 |
| 313.5    | 2   | 0 | 0 | 0.807049 | false | 0 | INTS3      | 5346    | 0.63004  |
| 313.5    | 2   | 0 | 0 | 0.807049 | false | 0 | ZMIZ1      | 5346    | 0.63004  |
| 135.75   | 8   | 0 | 0 | 0.81601  | false | 0 | E2F6       | 36522   | 0.266832 |
| 137      | 1   | 0 | 0 | 0.589008 | false | 0 | DCP1A      | 0       | 0        |
| 313.5    | 2   | 0 | 0 | 0.807049 | false | 0 | FOXM1      | 5346    | 0.63004  |
| 157      | 6   | 0 | 0 | 0.813023 | false | 0 | RARA       | 22106   | 0.310757 |
| 313.5    | 2   | 0 | 0 | 0.807049 | false | 0 | CEBPD      | 5346    | 0.63004  |
| 313.5    | 2   | 0 | 0 | 0.807049 | false | 0 | INTS11     | 5346    | 0.63004  |
| 313.5    | 2   | 0 | 0 | 0.807049 | false | 0 | STAT5A     | 5346    | 0.63004  |
| 313.5    | 2   | 0 | 0 | 0.807049 | false | 0 | CSNK2A1    | 5346    | 0.63004  |
| 313.5    | 2   | 0 | 0 | 0.807049 | false | 0 | AFF4       | 5346    | 0.63004  |
| 123.5714 | 7   | 0 | 0 | 0.81362  | false | 0 | ELF3       | 23364   | 0.244166 |
| 313.5    | 2   | 0 | 0 | 0.807049 | false | 0 | ZNF83      | 5346    | 0.63004  |
| 313.5    | 2   | 0 | 0 | 0.807049 | false | 0 | CCND2      | 5346    | 0.63004  |
| 236.3333 | 3   | 0 | 0 | 0.808244 | false | 0 | EOMES      | 8268    | 0.473508 |
| 235.3333 | 3   | 0 | 0 | 0.808841 | false | 0 | MED26      | 9546    | 0.470549 |
| 313.5    | 2   | 0 | 0 | 0.807049 | false | 0 | TAF7       | 5346    | 0.63004  |
| 313.5    | 2   | 0 | 0 | 0.807049 | false | 0 | BRD1       | 5346    | 0.63004  |
| 170.8    | 5   | 0 | 0 | 0.811828 | false | 0 | CXXC1      | 18660   | 0.338922 |
| 191.25   | 4   | 0 | 0 | 0.810036 | false | 0 | PBX1       | 12208   | 0.381263 |
| 313.5    | 2   | 0 | 0 | 0.807049 | false | 0 | KLF6       | 5346    | 0.63004  |
| 237.3333 | 3   | 0 | 0 | 0.809438 | false | 0 | NFKB1      | 10106   | 0.473614 |
| 180      | 4   | 0 | 0 | 0.811231 | false | 0 | PAX5       | 13298   | 0.357285 |
| 239.3333 | 3   | 0 | 0 | 0.809438 | false | 0 | NFATC1     | 9476    | 0.477622 |
| 237.3333 | 3   | 0 | 0 | 0.809438 | false | 0 | CHD1       | 10106   | 0.473614 |
| 313.5    | 2   | 0 | 0 | 0.807049 | false | 0 | ING5       | 5346    | 0.63004  |
| 172      | 5   | 0 | 0 | 0.811828 | false | 0 | LEO1       | 18080   | 0.341317 |
| 313.5    | 2   | 0 | 0 | 0.807049 | false | 0 | GTF2F1     | 5346    | 0.63004  |
| 181.75   | 4   | 0 | 0 | 0.811231 | false | 0 | BRPF3      | 14716   | 0.360778 |
| 191.25   | 4   | 0 | 0 | 0.810036 | false | 0 | CDK7       | 12208   | 0.381263 |
| 176.4    | 5   | 0 | 0 | 0.812425 | false | 0 | CDK8       | 19718   | 0.349402 |
| 137      | 1   | 0 | 0 | 0.589008 | false | 0 | ERCC2      | 0       | 0        |
| 7.364964 | 137 | 0 | 0 | 0.755376 | false | 0 | hsa-miR-12 | 1131748 | 0.219482 |
| 237.6667 | 3   | 0 | 0 | 0.810036 | false | 0 | SMARCB1    | 10896   | 0.473333 |
| 195.6667 | 3   | 0 | 0 | 0.805854 | false | 0 | TP73       | 4784    | 0.394861 |
| 110.2222 | 9   | 0 | 0 | 0.819594 | false | 0 | TP63       | 48342   | 0.214161 |
| 248      | 2   | 0 | 0 | 0.802867 | false | 0 | POU5F1     | 1176    | 0.505112 |
| 10.66667 | 6   | 0 | 0 | 0.674134 | false | 0 | hsa-miR-12 | 1156    | 0.386667 |
| 185.6    | 5   | 0 | 0 | 0.812425 | false | 0 | HCFC1      | 21228   | 0.367729 |
| 148.5714 | 7   | 0 | 0 | 0.816607 | false | 0 | TBP        | 32190   | 0.291068 |
| 211.25   | 4   | 0 | 0 | 0.810633 | false | 0 | NELFE      | 14876   | 0.4205   |

|          |    |   |   |          |       |           |       |          |
|----------|----|---|---|----------|-------|-----------|-------|----------|
| 112.7    | 10 | 0 | 0 | 0.817204 | false | 0 FOS     | 41640 | 0.221188 |
| 236      | 3  | 0 | 0 | 0.808244 | false | 0 ICE1    | 8006  | 0.472837 |
| 201.25   | 4  | 0 | 0 | 0.809438 | false | 0 NFYB    | 12368 | 0.402108 |
| 189.5    | 4  | 0 | 0 | 0.809438 | false | 0 NR1H3   | 11480 | 0.378514 |
| 111.3333 | 12 | 0 | 0 | 0.821983 | false | 0 E2F1    | 65310 | 0.215917 |
| 123.6    | 10 | 0 | 0 | 0.817802 | false | 0 MYB     | 48044 | 0.242292 |
| 177.6    | 5  | 0 | 0 | 0.810633 | false | 0 SP2     | 18194 | 0.353908 |
| 140.875  | 8  | 0 | 0 | 0.817204 | false | 0 CBX3    | 39024 | 0.275888 |
| 165      | 6  | 0 | 0 | 0.81362  | false | 0 YY1     | 25342 | 0.326044 |
| 151.7143 | 7  | 0 | 0 | 0.814815 | false | 0 SIN3A   | 30048 | 0.299036 |
| 314.5    | 2  | 0 | 0 | 0.805854 | false | 0 ING2    | 3784  | 0.634615 |
| 106.0833 | 12 | 0 | 0 | 0.820789 | false | 0 SPI1    | 68172 | 0.206451 |
| 138      | 8  | 0 | 0 | 0.816607 | false | 0 ETS1    | 37602 | 0.270751 |
| 139.2857 | 7  | 0 | 0 | 0.814217 | false | 0 FGFR1   | 27350 | 0.274922 |
| 118.6364 | 11 | 0 | 0 | 0.820191 | false | 0 HEY1    | 58070 | 0.231113 |
| 314.5    | 2  | 0 | 0 | 0.805854 | false | 0 STAT5B  | 3784  | 0.634615 |
| 130.1429 | 7  | 0 | 0 | 0.813023 | false | 0 CNOT3   | 23966 | 0.25777  |
| 149.4    | 5  | 0 | 0 | 0.810036 | false | 0 FOSL1   | 11932 | 0.297992 |
| 157.6667 | 6  | 0 | 0 | 0.813023 | false | 0 BCL6    | 23686 | 0.312085 |
| 119.0909 | 11 | 0 | 0 | 0.821386 | false | 0 MYCN    | 60800 | 0.231098 |
| 116.2727 | 11 | 0 | 0 | 0.818399 | false | 0 ELF1    | 52924 | 0.227812 |
| 125.3    | 10 | 0 | 0 | 0.820191 | false | 0 RELA    | 52568 | 0.243725 |
| 97.25    | 16 | 0 | 0 | 0.82736  | false | 0 HIF1A   | 99298 | 0.186531 |
| 126.7    | 10 | 0 | 0 | 0.818399 | false | 0 NOTCH1  | 50336 | 0.247929 |
| 123.2222 | 9  | 0 | 0 | 0.814815 | false | 0 CTCFL   | 36008 | 0.243471 |
| 76.5     | 8  | 0 | 0 | 0.647551 | false | 0 TCF4    | 11796 | 0.338565 |
| 108.1    | 10 | 0 | 0 | 0.816607 | false | 0 JUND    | 36798 | 0.2125   |
| 170.8    | 5  | 0 | 0 | 0.813023 | false | 0 ATF2    | 19640 | 0.337575 |
| 153.8333 | 6  | 0 | 0 | 0.814217 | false | 0 YAP1    | 23892 | 0.303241 |
| 238.3333 | 3  | 0 | 0 | 0.808244 | false | 0 RFX5    | 8910  | 0.477532 |
| 106.4286 | 14 | 0 | 0 | 0.82497  | false | 0 BRD4    | 80928 | 0.205114 |
| 314.5    | 2  | 0 | 0 | 0.805854 | false | 0 HOXA6   | 3784  | 0.634615 |
| 138.1429 | 7  | 0 | 0 | 0.813023 | false | 0 BHLHE40 | 23944 | 0.273738 |
| 223.6667 | 3  | 0 | 0 | 0.807646 | false | 0 SUMO1   | 6982  | 0.448925 |
| 131.8889 | 9  | 0 | 0 | 0.817204 | false | 0 EGR1    | 41320 | 0.258674 |
| 132.4286 | 7  | 0 | 0 | 0.814815 | false | 0 ZNF263  | 28268 | 0.260771 |
| 314.5    | 2  | 0 | 0 | 0.805854 | false | 0 SREBF1  | 3784  | 0.634615 |
| 139.375  | 8  | 0 | 0 | 0.815412 | false | 0 KMT2D   | 35066 | 0.274554 |
| 314.5    | 2  | 0 | 0 | 0.805854 | false | 0 E2F3    | 3784  | 0.634615 |
| 96.4     | 10 | 0 | 0 | 0.816607 | false | 0 GATA3   | 34462 | 0.189286 |
| 122.4444 | 9  | 0 | 0 | 0.816607 | false | 0 JUN     | 35558 | 0.240484 |
| 151.8333 | 6  | 0 | 0 | 0.812425 | false | 0 BRD3    | 21172 | 0.301065 |
| 165.6667 | 6  | 0 | 0 | 0.814217 | false | 0 RUNX3   | 26246 | 0.32672  |
| 101.1    | 10 | 0 | 0 | 0.818996 | false | 0 SMC1A   | 40528 | 0.197047 |
| 148.8571 | 7  | 0 | 0 | 0.815412 | false | 0 WDR5    | 31090 | 0.292786 |
| 126.2857 | 7  | 0 | 0 | 0.813023 | false | 0 MAFK    | 37982 | 0.250071 |
| 117.125  | 8  | 0 | 0 | 0.818996 | false | 0 MYOD1   | 94252 | 0.227696 |

|          |    |   |   |          |       |          |        |          |
|----------|----|---|---|----------|-------|----------|--------|----------|
| 158.3333 | 6  | 0 | 0 | 0.814217 | false | 0 PBX3   | 24534  | 0.312169 |
| 126.5    | 8  | 0 | 0 | 0.814815 | false | 0 SRF    | 30712  | 0.249503 |
| 146.3333 | 6  | 0 | 0 | 0.812425 | false | 0 ATF3   | 20544  | 0.290086 |
| 206.25   | 4  | 0 | 0 | 0.810036 | false | 0 CHD2   | 12714  | 0.411323 |
| 91.33333 | 18 | 0 | 0 | 0.827957 | false | 0 MYC    | 107718 | 0.175405 |
| 195.5    | 4  | 0 | 0 | 0.809438 | false | 0 HNF4G  | 12350  | 0.390562 |
| 100.3333 | 3  | 0 | 0 | 0.614695 | false | 0 ETV1   | 1536   | 0.574181 |
| 113.6364 | 11 | 0 | 0 | 0.820789 | false | 0 EBF1   | 54122  | 0.220856 |
| 78.35    | 20 | 0 | 0 | 0.831541 | false | 0 AR     | 135218 | 0.149037 |
| 147.2857 | 7  | 0 | 0 | 0.81601  | false | 0 RBBP5  | 34372  | 0.289102 |
| 118.0833 | 12 | 0 | 0 | 0.821983 | false | 0 STAT1  | 66620  | 0.229126 |
| 110.8462 | 13 | 0 | 0 | 0.823178 | false | 0 TCF12  | 72592  | 0.214543 |
| 159.6    | 5  | 0 | 0 | 0.811231 | false | 0 PGR    | 16488  | 0.3172   |
| 188.6    | 5  | 0 | 0 | 0.81362  | false | 0 E2F4   | 21698  | 0.372222 |
| 114.8333 | 12 | 0 | 0 | 0.821983 | false | 0 TRIM28 | 66344  | 0.222766 |
| 103.4615 | 13 | 0 | 0 | 0.822581 | false | 0 TP53   | 68350  | 0.200512 |
| 130.75   | 8  | 0 | 0 | 0.817802 | false | 0 SUMO2  | 36722  | 0.255413 |
| 94.76471 | 17 | 0 | 0 | 0.826762 | false | 0 ERG    | 103856 | 0.182422 |
| 145.6667 | 6  | 0 | 0 | 0.811828 | false | 0 NFIC   | 17562  | 0.289333 |
| 114.5833 | 12 | 0 | 0 | 0.821386 | false | 0 PHF8   | 63552  | 0.222712 |
| 104      | 15 | 0 | 0 | 0.82497  | false | 0 EP300  | 87328  | 0.20078  |
| 240      | 3  | 0 | 0 | 0.807646 | false | 0 KLF11  | 7572   | 0.481855 |
| 201.25   | 4  | 0 | 0 | 0.809438 | false | 0 NFYA   | 12368  | 0.402108 |
| 200.5    | 4  | 0 | 0 | 0.809438 | false | 0 XBP1   | 10730  | 0.400602 |
| 119.4    | 10 | 0 | 0 | 0.820191 | false | 0 ZNF143 | 51786  | 0.232157 |
| 89.5625  | 16 | 0 | 0 | 0.825568 | false | 0 CREB1  | 89804  | 0.172636 |
| 314.5    | 2  | 0 | 0 | 0.805854 | false | 0 HOXA4  | 3784   | 0.634615 |
| 109.5833 | 12 | 0 | 0 | 0.822581 | false | 0 TEAD4  | 64330  | 0.212077 |
| 129.6667 | 9  | 0 | 0 | 0.817204 | false | 0 TFAP2A | 43094  | 0.254282 |
| 134.8571 | 7  | 0 | 0 | 0.81601  | false | 0 FOXA2  | 28368  | 0.26454  |
| 119.7    | 10 | 0 | 0 | 0.818399 | false | 0 GABPA  | 45704  | 0.234122 |
| 133.8889 | 9  | 0 | 0 | 0.816607 | false | 0 TAF1   | 42538  | 0.263146 |
| 125.7    | 10 | 0 | 0 | 0.819594 | false | 0 SP1    | 51340  | 0.24499  |
| 147.8    | 5  | 0 | 0 | 0.810036 | false | 0 MAFF   | 24046  | 0.294779 |
| 133.875  | 8  | 0 | 0 | 0.81362  | false | 0 FOXO1  | 30412  | 0.26522  |
| 314.5    | 2  | 0 | 0 | 0.805854 | false | 0 BACH2  | 3784   | 0.634615 |
| 187      | 5  | 0 | 0 | 0.81362  | false | 0 HSF1   | 23006  | 0.369048 |
| 176.6    | 5  | 0 | 0 | 0.811828 | false | 0 SETD1A | 20330  | 0.350499 |
| 84.33333 | 9  | 0 | 0 | 0.664277 | false | 0 SNAI2  | 18790  | 0.333333 |
| 314.5    | 2  | 0 | 0 | 0.805854 | false | 0 NCOR1  | 3784   | 0.634615 |
| 128.1    | 10 | 0 | 0 | 0.820191 | false | 0 KLF1   | 52374  | 0.249216 |
| 129.4286 | 7  | 0 | 0 | 0.815412 | false | 0 SMC3   | 28434  | 0.254314 |
| 168.1667 | 6  | 0 | 0 | 0.81362  | false | 0 KLF5   | 24882  | 0.332339 |
| 138      | 2  | 0 | 0 | 0.624851 | false | 0 NELFA  | 942    | 0.717277 |
| 119.1818 | 11 | 0 | 0 | 0.821386 | false | 0 NFE2   | 56912  | 0.231276 |
| 119.3    | 10 | 0 | 0 | 0.817204 | false | 0 TAL1   | 41690  | 0.234257 |
| 99.85714 | 14 | 0 | 0 | 0.823775 | false | 0 FLI1   | 76010  | 0.19308  |

|          |     |   |   |          |       |              |        |          |
|----------|-----|---|---|----------|-------|--------------|--------|----------|
| 255.3333 | 3   | 0 | 0 | 0.809438 | false | 0 ELL2       | 10072  | 0.509686 |
| 152.3333 | 6   | 0 | 0 | 0.812425 | false | 0 FOSL2      | 20692  | 0.302063 |
| 238.3333 | 3   | 0 | 0 | 0.808244 | false | 0 IKZF1      | 8910   | 0.477532 |
| 94.46154 | 13  | 0 | 0 | 0.821386 | false | 0 TFAP2C     | 60848  | 0.183618 |
| 129.7143 | 7   | 0 | 0 | 0.813023 | false | 0 TRIM25     | 22248  | 0.256915 |
| 115.7778 | 9   | 0 | 0 | 0.818399 | false | 0 STAG1      | 41694  | 0.225941 |
| 89.76923 | 13  | 0 | 0 | 0.821983 | false | 0 RAD21      | 60256  | 0.174057 |
| 72.17647 | 17  | 0 | 0 | 0.823775 | false | 0 FOXA1      | 72156  | 0.139836 |
| 123.2727 | 11  | 0 | 0 | 0.820789 | false | 0 KDM2B      | 59242  | 0.23975  |
| 81       | 18  | 0 | 0 | 0.829152 | false | 0 ESR1       | 101870 | 0.154739 |
| 213      | 4   | 0 | 0 | 0.811828 | false | 0 BRCA1      | 16384  | 0.422311 |
| 120.4545 | 11  | 0 | 0 | 0.819594 | false | 0 LARP7      | 55070  | 0.235147 |
| 115.2857 | 7   | 0 | 0 | 0.811231 | false | 0 HNF4A      | 19634  | 0.229489 |
| 139      | 1   | 0 | 0 | 0.592593 | false | 0 TCF21      | 0      | 0        |
| 122.2    | 10  | 0 | 0 | 0.820191 | false | 0 GATA1      | 53536  | 0.237647 |
| 115.7273 | 11  | 0 | 0 | 0.819594 | false | 0 TCF3       | 56162  | 0.225841 |
| 84.1     | 20  | 0 | 0 | 0.829749 | false | 0 MAX        | 122608 | 0.161047 |
| 175.2    | 5   | 0 | 0 | 0.811828 | false | 0 SUPT5H     | 18800  | 0.347705 |
| 130.1111 | 9   | 0 | 0 | 0.818399 | false | 0 TFAP4      | 45262  | 0.254156 |
| 116.7273 | 11  | 0 | 0 | 0.819594 | false | 0 ARNTL      | 53616  | 0.22781  |
| 169.6667 | 6   | 0 | 0 | 0.81362  | false | 0 PML        | 24264  | 0.335321 |
| 125      | 10  | 0 | 0 | 0.818996 | false | 0 NRF1       | 50678  | 0.244094 |
| 122.3    | 10  | 0 | 0 | 0.817802 | false | 0 MED1       | 45588  | 0.239723 |
| 125      | 10  | 0 | 0 | 0.820789 | false | 0 NR3C1      | 53576  | 0.242661 |
| 109.3846 | 13  | 0 | 0 | 0.823775 | false | 0 KDM5B      | 76042  | 0.211276 |
| 134.625  | 8   | 0 | 0 | 0.816607 | false | 0 TCF7L2     | 36220  | 0.264081 |
| 192.5    | 4   | 0 | 0 | 0.810633 | false | 0 RCOR1      | 12918  | 0.383    |
| 92.6     | 15  | 0 | 0 | 0.826165 | false | 0 CTCF       | 85002  | 0.177864 |
| 155.4286 | 7   | 0 | 0 | 0.814815 | false | 0 IRF1       | 31190  | 0.306406 |
| 98.8     | 10  | 0 | 0 | 0.817204 | false | 0 STAT3      | 38420  | 0.193663 |
| 139.25   | 8   | 0 | 0 | 0.81601  | false | 0 KMT2A      | 36180  | 0.273762 |
| 164      | 5   | 0 | 0 | 0.811828 | false | 0 PPARG      | 16816  | 0.325349 |
| 198.25   | 4   | 0 | 0 | 0.810036 | false | 0 ELK1       | 12994  | 0.395291 |
| 141.125  | 8   | 0 | 0 | 0.816607 | false | 0 MXI1       | 36462  | 0.276927 |
| 106.5    | 10  | 0 | 0 | 0.817802 | false | 0 CHD8       | 40904  | 0.208498 |
| 107.6364 | 11  | 0 | 0 | 0.823775 | false | 0 REST       | 66334  | 0.207061 |
| 131.125  | 8   | 0 | 0 | 0.815412 | false | 0 MBD3       | 33022  | 0.258185 |
| 212.75   | 4   | 0 | 0 | 0.811231 | false | 0 CDK9       | 15352  | 0.422655 |
| 107.9231 | 13  | 0 | 0 | 0.821386 | false | 0 RUNX1      | 67128  | 0.210065 |
| 84.76471 | 17  | 0 | 0 | 0.82497  | false | 0 MAZ        | 89380  | 0.163923 |
| 181.6    | 5   | 0 | 0 | 0.811828 | false | 0 BCOR       | 18818  | 0.360479 |
| 8.18705  | 139 | 0 | 0 | 0.758961 | false | 0 hsa-miR-11 | 903786 | 0.23184  |
| 163      | 5   | 0 | 0 | 0.811828 | false | 0 SMAD1      | 15194  | 0.323353 |



ICoefficient
